# Supplementary material for: A subset of CB002 xanthine analogs bypass p53-signaling to restore a p53 transcriptome and target an S-phase cell cycle checkpoint in tumors with mutated-p53
Source: eLife journal article supplement (doi:10.7554/elife.70429), 2021-07-29

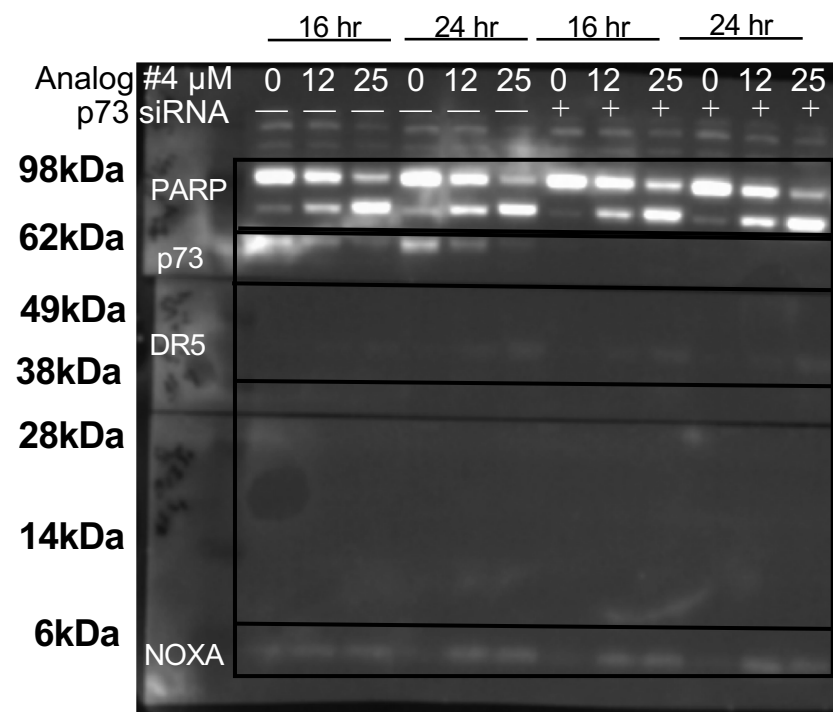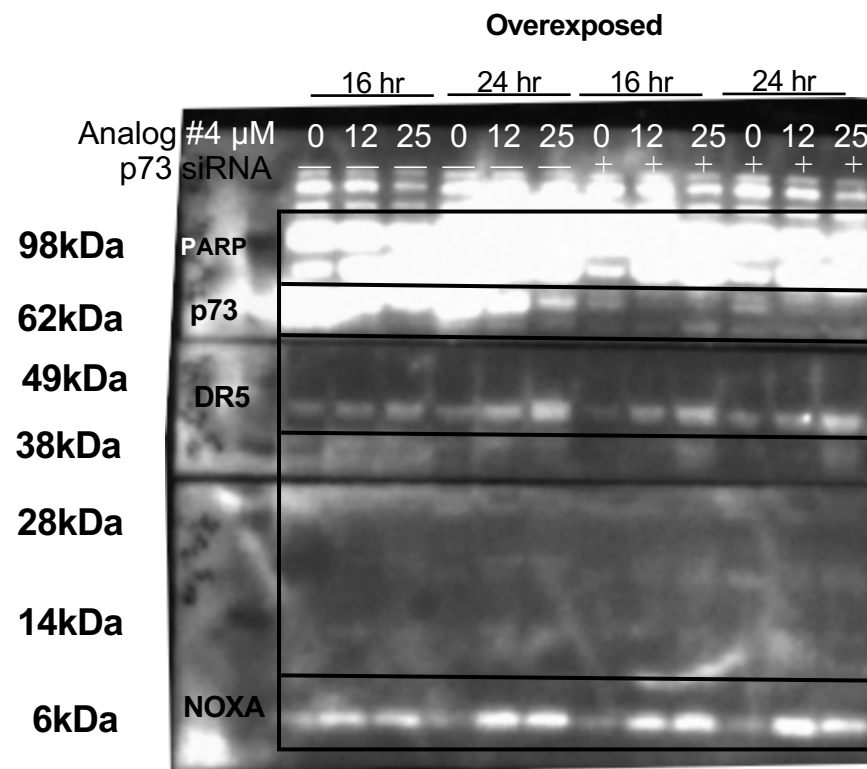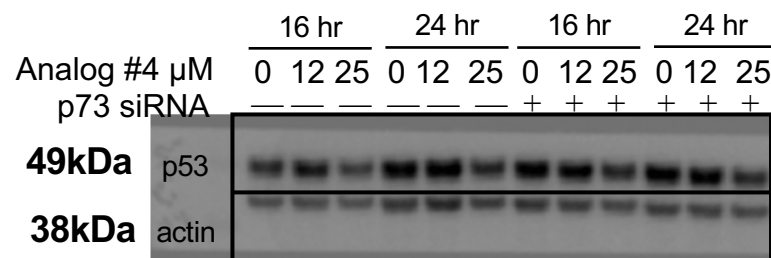

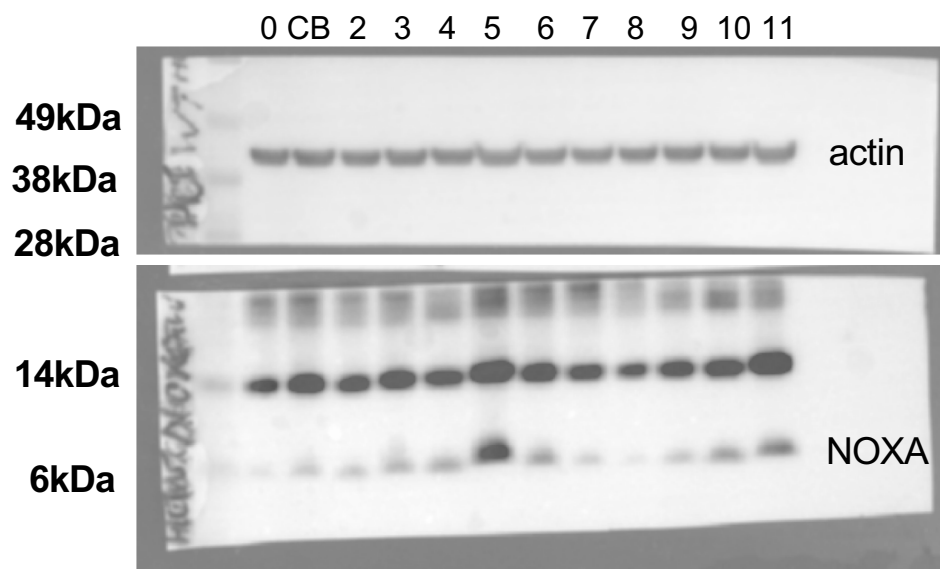

**HCT116**

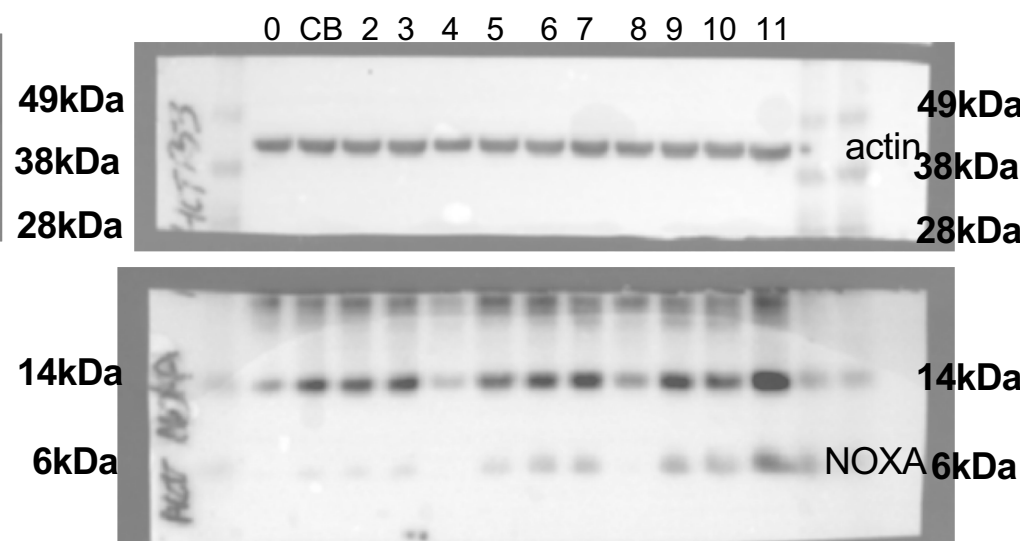

**HCT116 p53<sup>R175H</sup>**

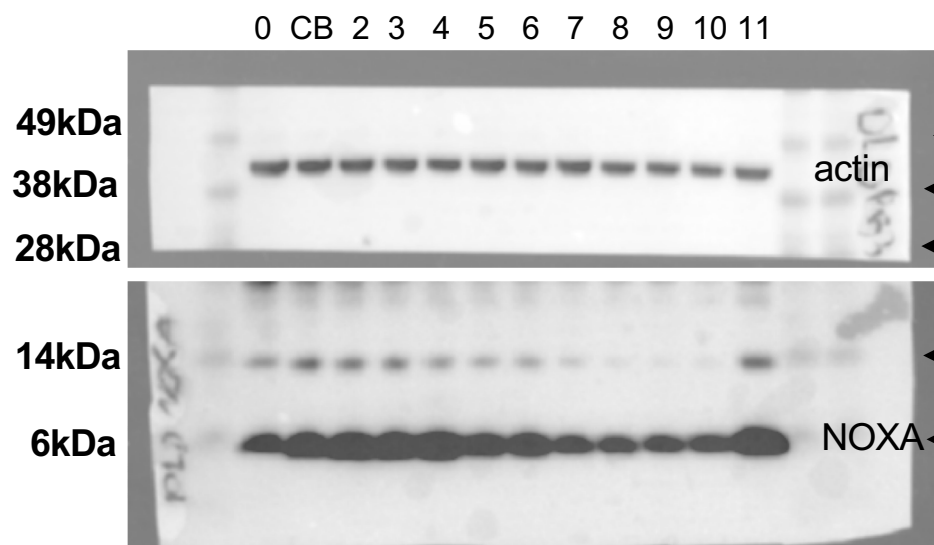

**DLD-1**

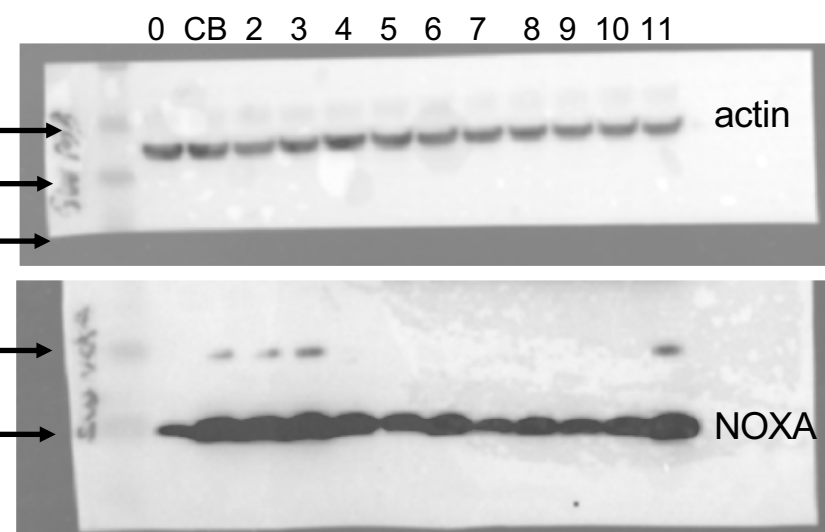

**SW480**

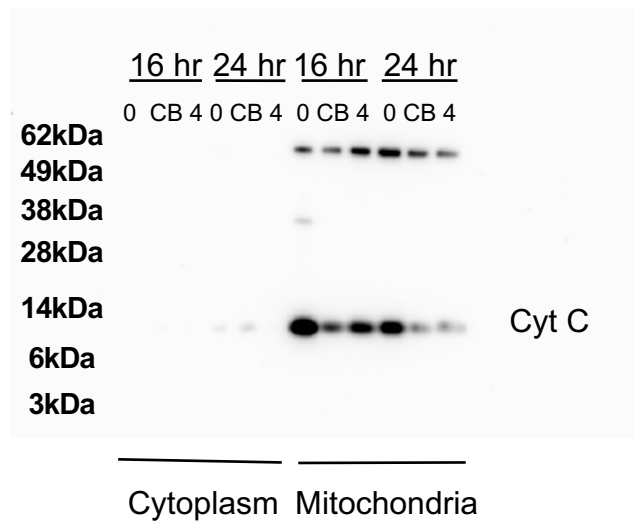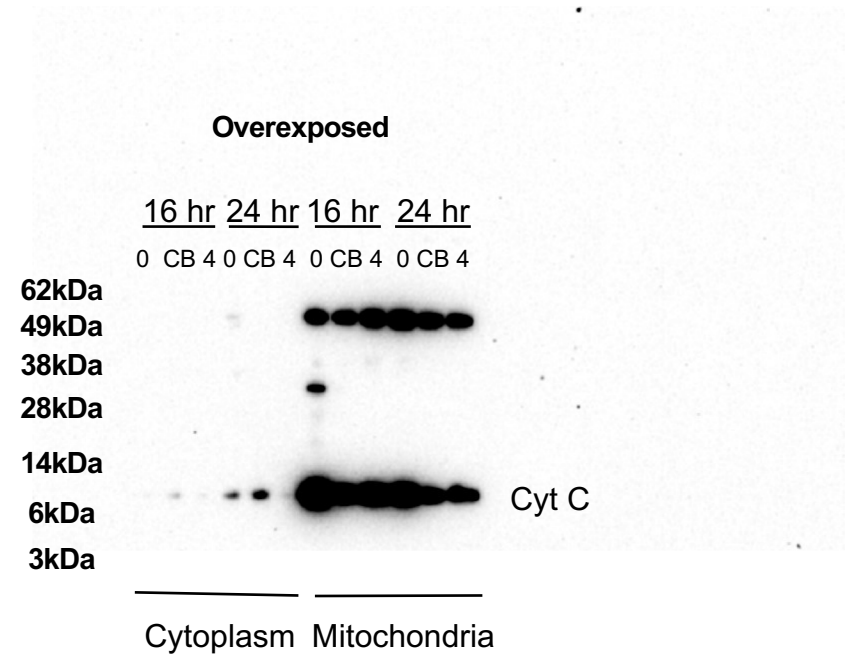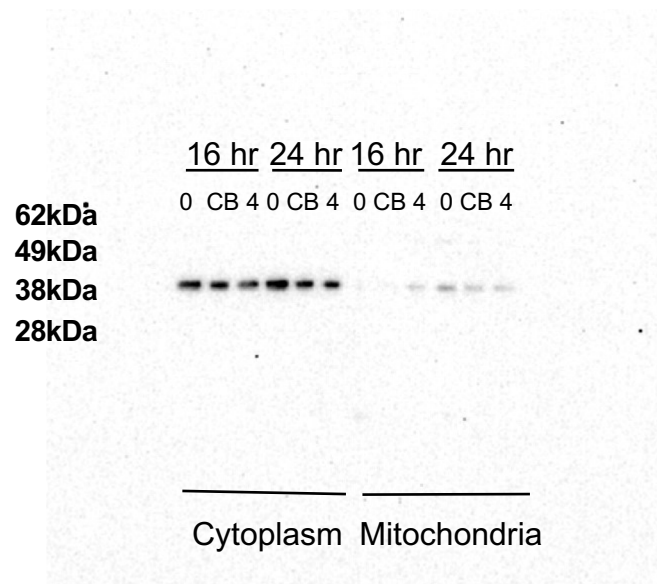





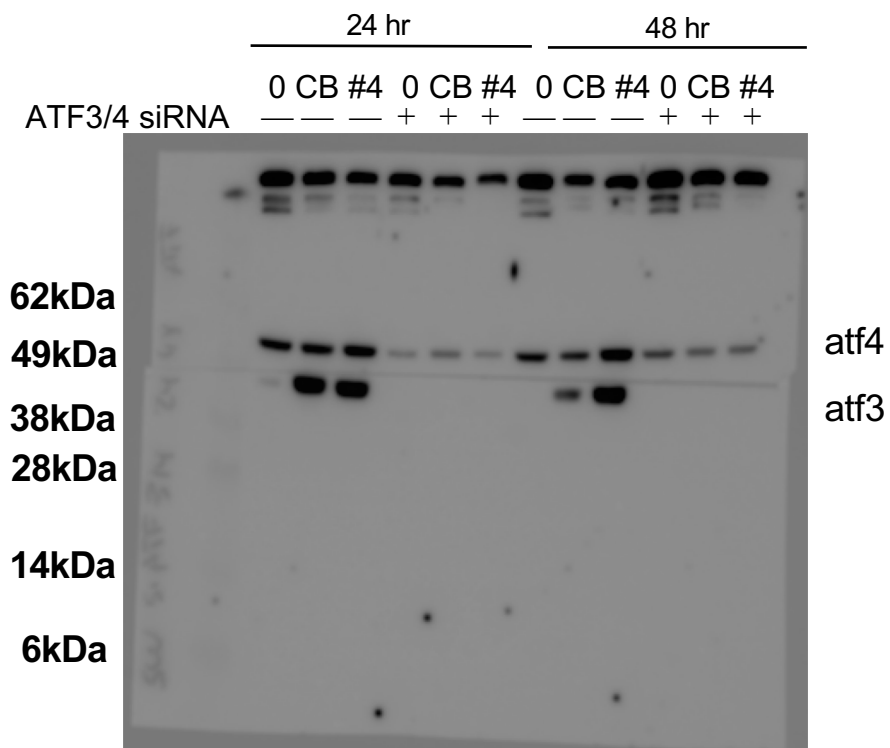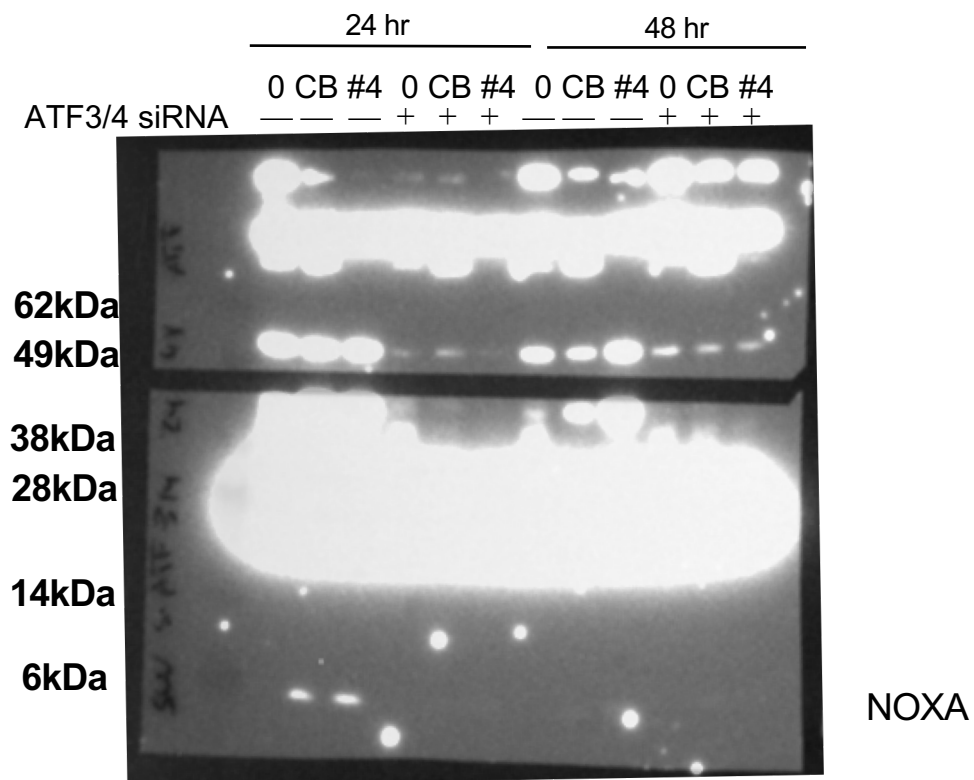

Overexposed

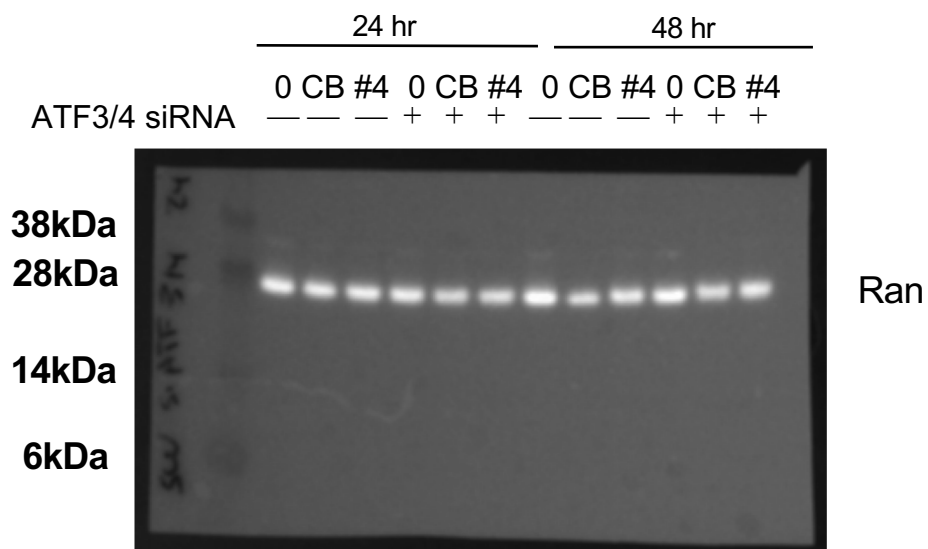

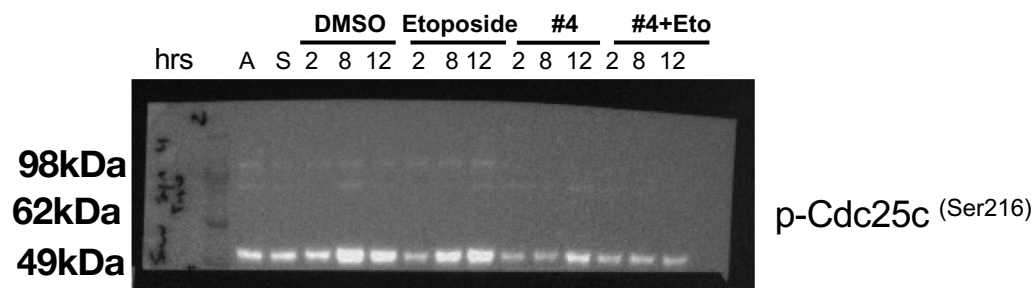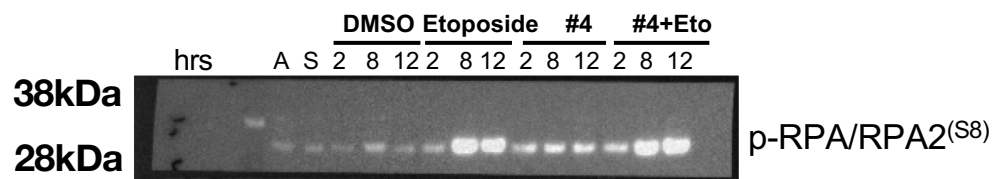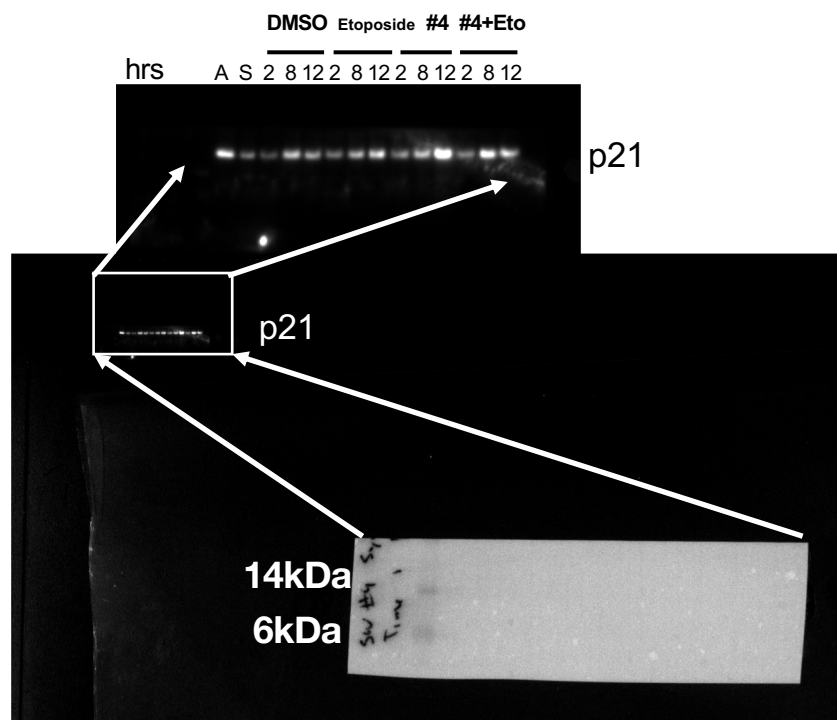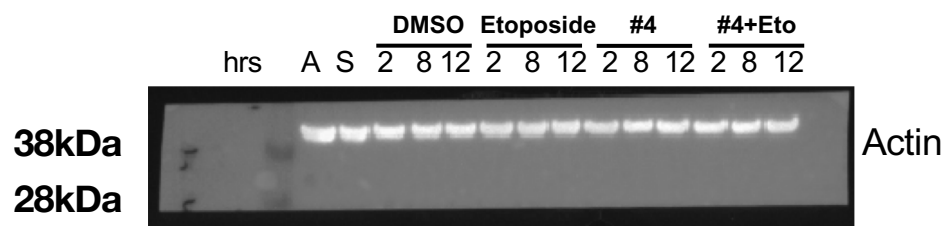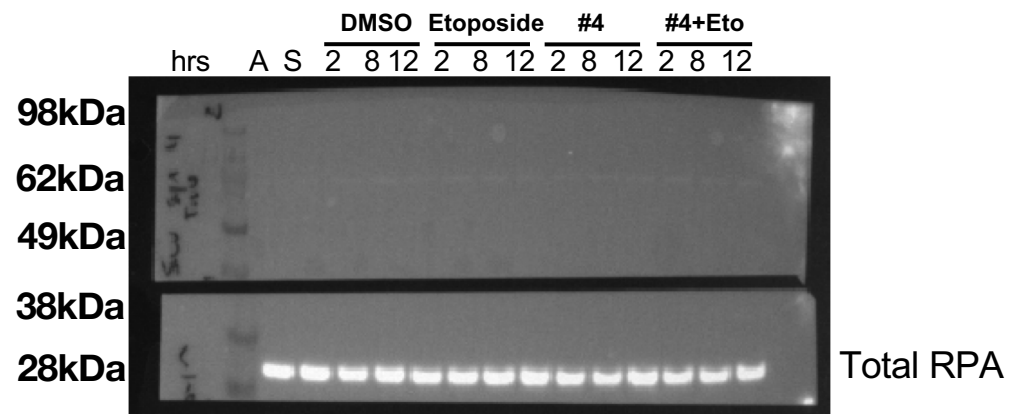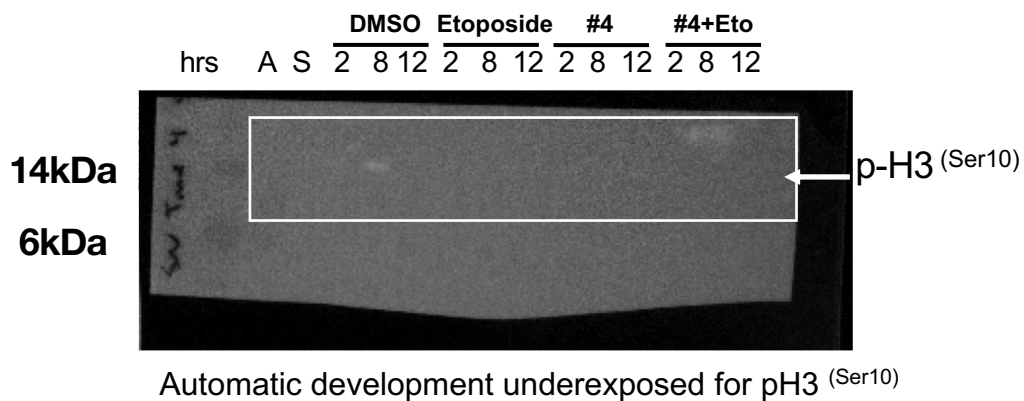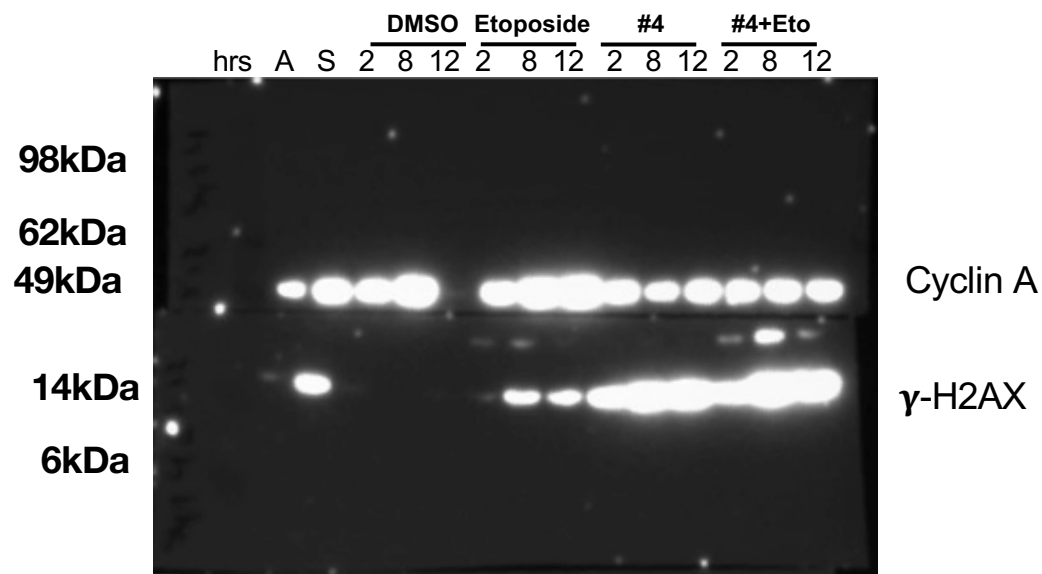

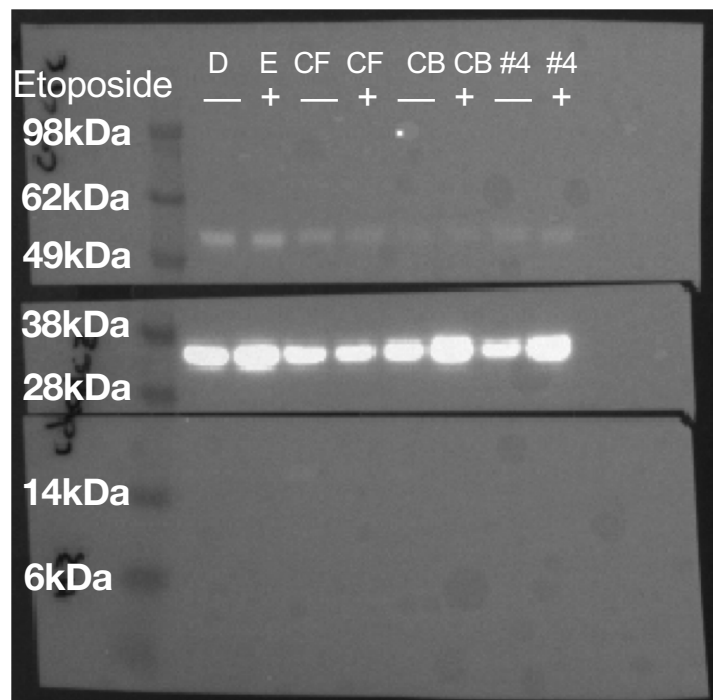

p-cdc25c (Ser216)

p-cdc2 (Tyr15)

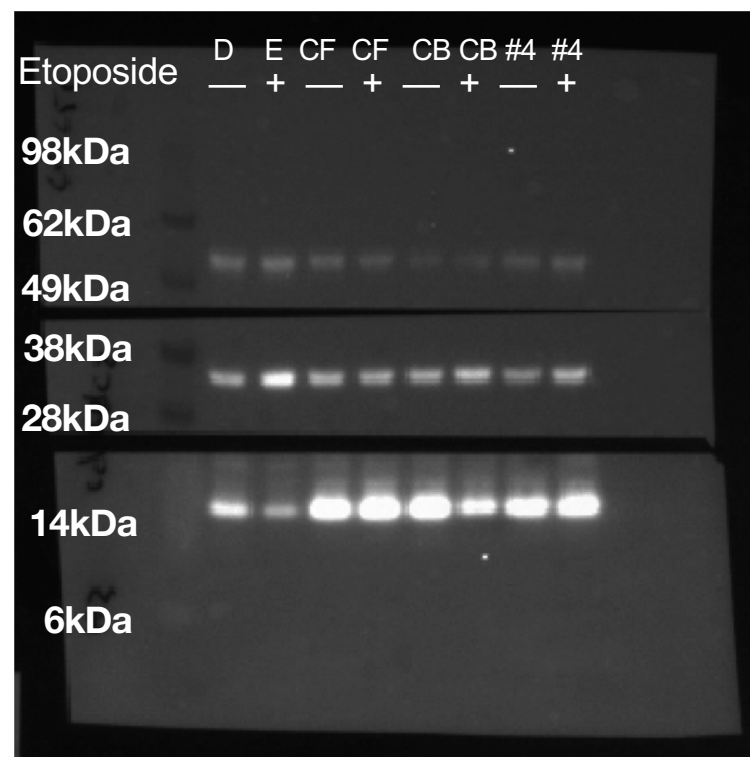

Total cdc25c

Total cdc2

Total H3

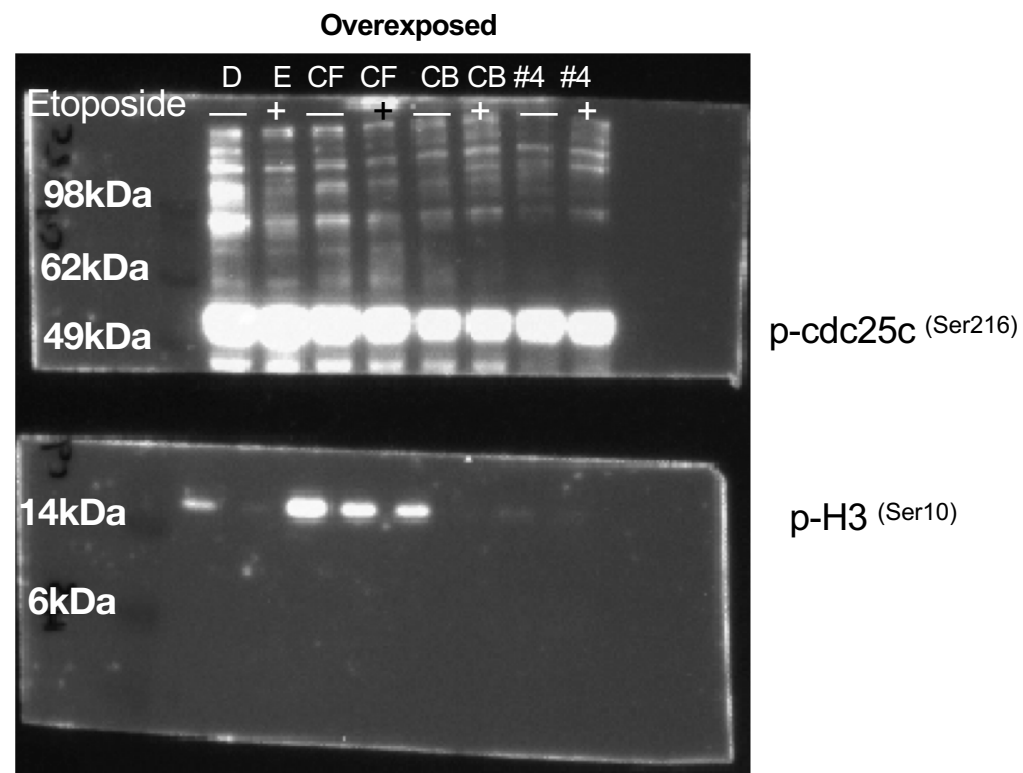

p-cdc25c (Ser216)

p-H3 (Ser10)

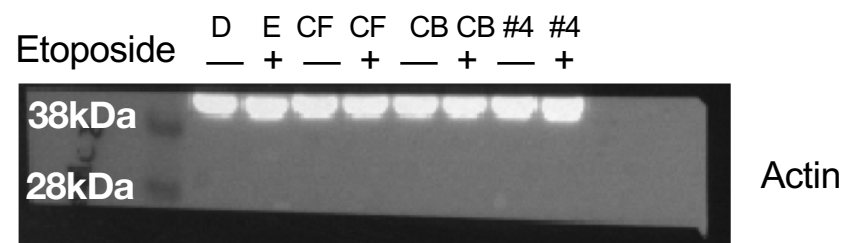

Actin

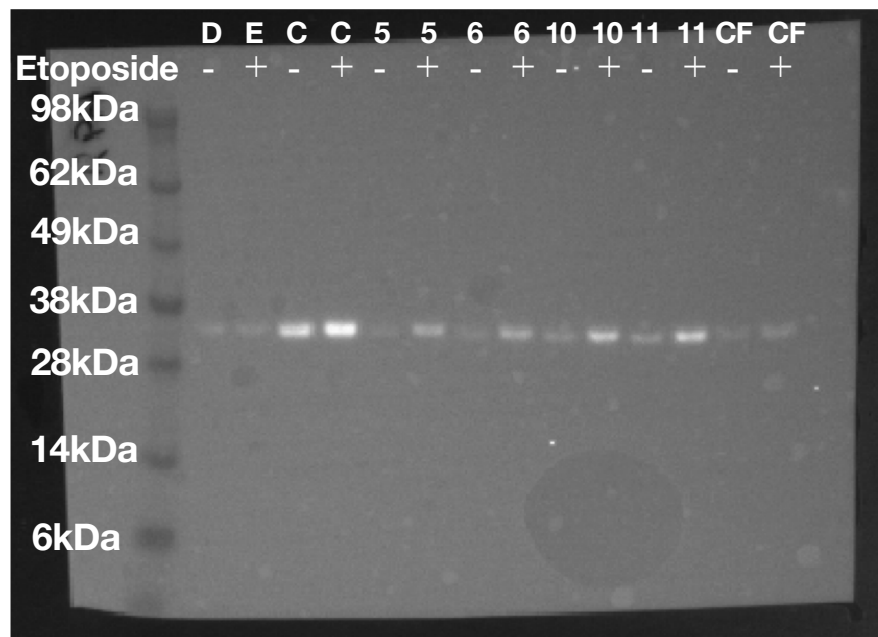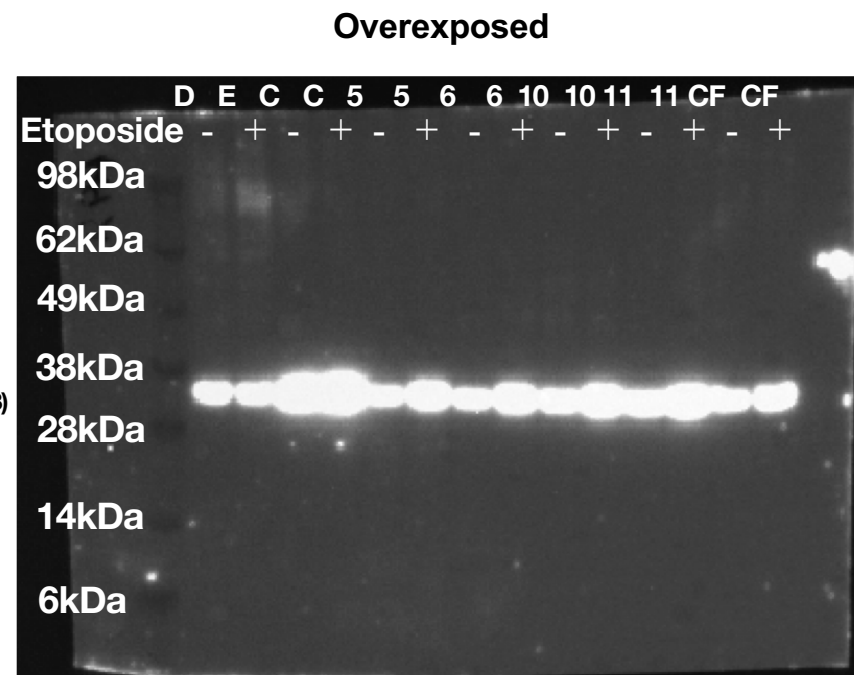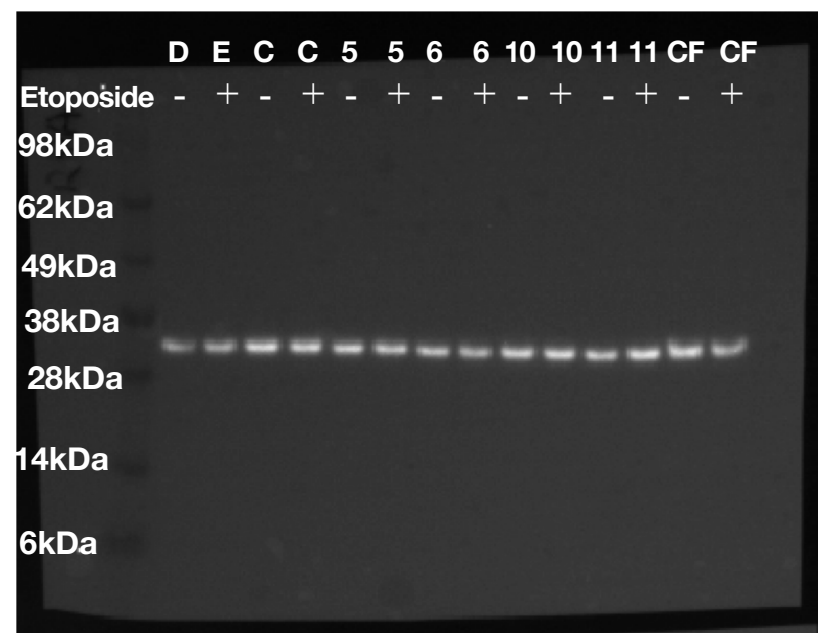

**Total RPA/RPA2**

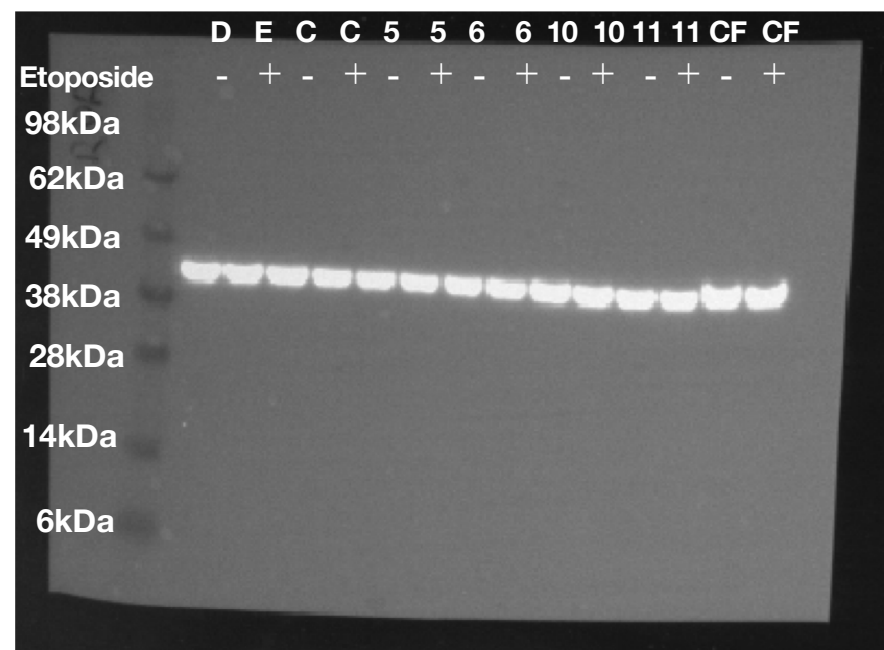

**ACTIN**

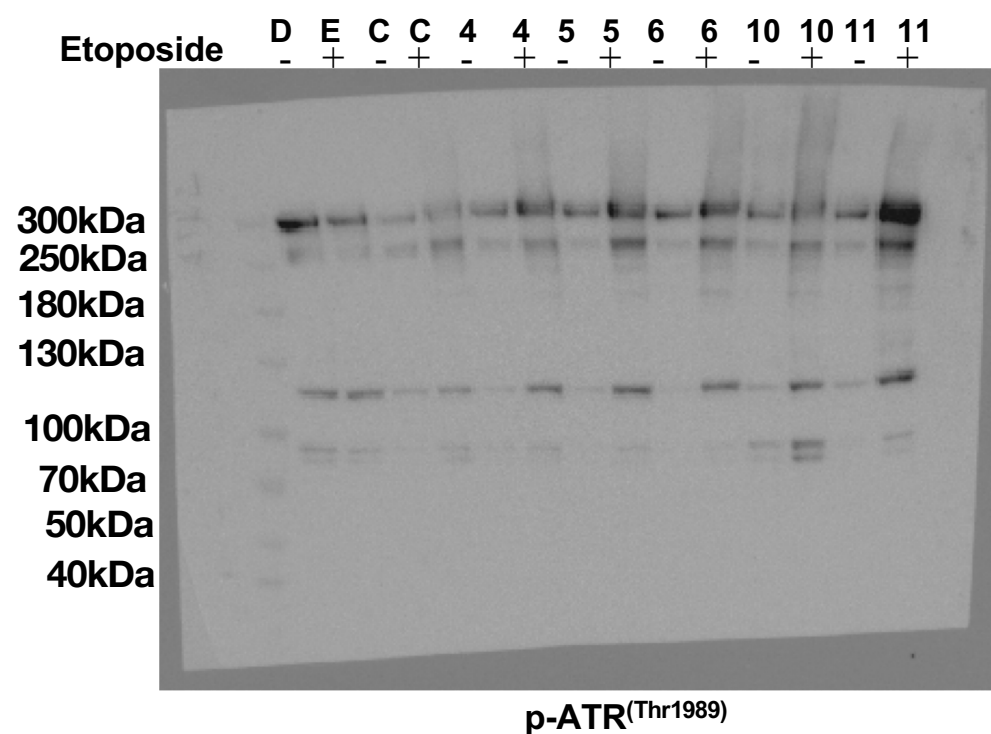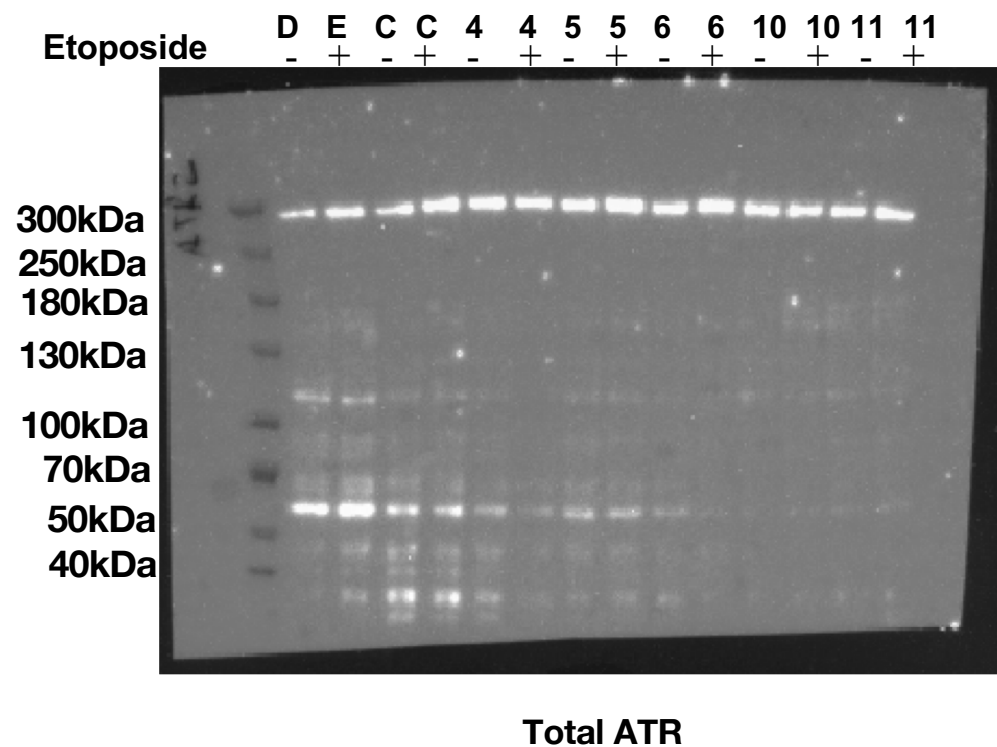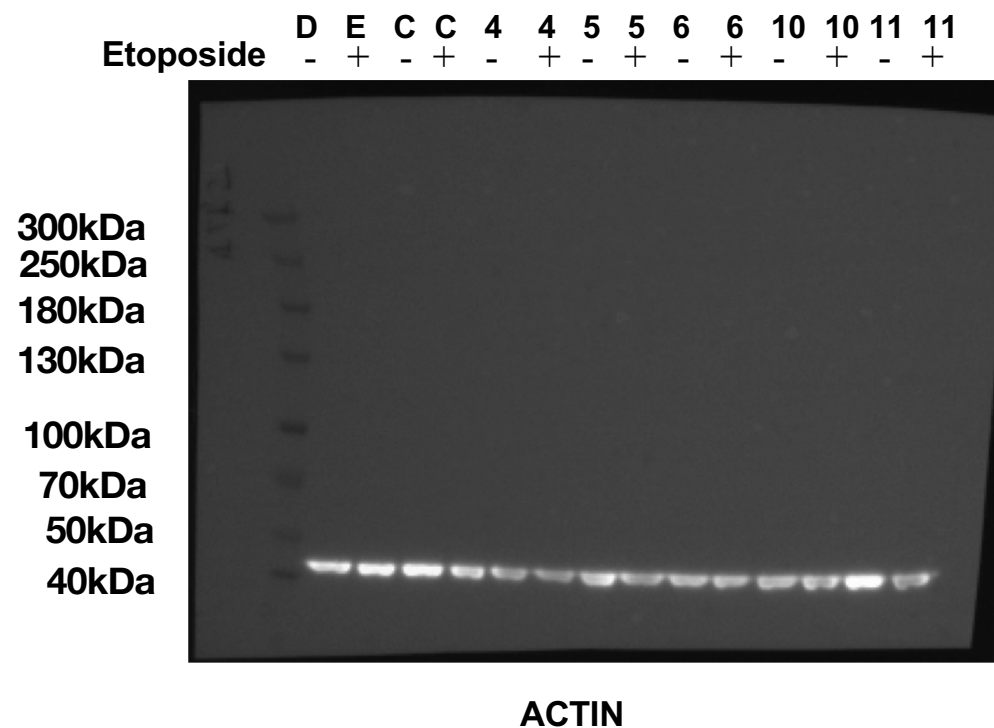

Supplement: data1 [file elife-70429-data1-v1.zip]
