# Supplementary material for: A subset of CB002 xanthine analogs bypass p53-signaling to restore a p53 transcriptome and target an S-phase cell cycle checkpoint in tumors with mutated-p53
Source: eLife. 2021 Jul 29;10:e70429. doi: 10.7554/eLife.70429 (PMC8321552; doi:10.7554/eLife.70429)
Supplement: Figure 2—source data 1. [file elife-70429-fig2-data1.xlsx]

## Sheet: Sheet1-Table description
Supplemental table includes gene expression values of DMSO vehicle control and analogue #4 SW480 treated cells at 12 hrs samples analyzed by microarray Affymetrix Human Gene 2.0-ST array probe set. Experiment included duplicates of each condition. Gene expression low expression cutoff of probe signal intensity was set at 50 (unless at least one sample did not meet this criteria for that particula…

## Sheet: Sheet 2 - DifferentialExpressio
PROBEID	ID	SYMBOL	GENE NAME	logFC	Average Expression	t	P.Value	FDR	B	SW480 treated with Analogue #4_A	SW480 treated with Analogue #4_B	SW480 treated with DMSO_A	SW480 treated with DMSO_B
16705961	NM_019058	DDIT4	DNA-damage-inducible transcript 4	2.87685	8.28187	26.0168	2.15146e-07	0.000781161	7.76851	9.73644	9.70415	6.94715	6.73973
16962022	NM_014398	LAMP3	lysosomal-associated membrane protein 3	2.32612	7.52201	24.4855	3.08572e-07	0.000781161	7.49316	8.71592	8.65421	6.38056	6.33734
16891555	NM_152386	SGPP2	sphingosine-1-phosphate phosphatase 2	2.45069	8.17464	24.2475	3.27008e-07	0.000781161	7.4478	9.39486	9.40509	6.87887	7.01972
16709128	NM_004419	DUSP5	dual specificity phosphatase 5	2.25304	8.0067	23.6353	3.80654e-07	0.000781161	7.32771	9.09322	9.17322	6.88236	6.87799
16697196	NM_052966	FAM129A	family with sequence similarity 129, member A	2.21858	7.7211	22.9263	4.56092e-07	0.000781161	7.18226	8.80237	8.85841	6.57117	6.65245
16910609	uc002wdn.3	TRIB3	tribbles pseudokinase 3	2.16323	8.22698	22.1008	5.66936e-07	0.000781161	7.00372	9.28777	9.32943	7.19685	7.09389
17079293	NM_057749	CCNE2	cyclin E2	-2.21345	6.04979	-21.9067	5.97382e-07	0.000781161	6.96023	5.011	4.87514	7.13772	7.17532
17045917	NM_001287426	UPP1	uridine phosphorylase 1	1.96801	6.14236	20.9448	7.79523e-07	0.000781161	6.73567	7.11265	7.14007	5.13298	5.18372
17123744	NR_121625	LOC100507639	uncharacterized LOC100507639	-1.98723	7.95317	-20.3033	9.37168e-07	0.000781161	6.57711	6.98058	6.93852	8.99816	8.8954
16859795	NM_004864	GDF15	growth differentiation factor 15	1.91003	8.79725	20.2806	9.43378e-07	0.000781161	6.57138	9.77788	9.72666	7.82496	7.85952
16736638	NM_001256371	E2F8	E2F transcription factor 8	-1.89688	8.45399	-20.0571	1.00734e-06	0.000781161	6.51427	7.53627	7.47485	9.38714	9.41772
17057759	NM_001001549	GRB10	growth factor receptor-bound protein 10	2.23796	5.7571	19.7892	1.09075e-06	0.000781161	6.4446	6.83559	6.91656	4.53294	4.74329
17009093	NM_001025366	VEGFA	vascular endothelial growth factor A	2.24374	6.62989	19.7695	1.09719e-06	0.000781161	6.43943	7.66084	7.84269	5.57665	5.43941
16717240	NM_003015	SFRP5	secreted frizzled-related protein 5	2.08017	9.58458	19.5239	1.18137e-06	0.000781161	6.37425	10.6473	10.602	8.45572	8.63327
16764817	NM_002281	KRT81	keratin 81	2.01572	7.67323	19.5117	1.18573e-06	0.000781161	6.37099	8.60529	8.75688	6.69011	6.64063
16681288	NM_001561	TNFRSF9	tumor necrosis factor receptor superfamily, member 9	1.82517	6.3294	19.1497	1.32456e-06	0.000818082	6.27262	7.21079	7.27317	5.39185	5.44178
16725041	NM_001142703	FAM111B	family with sequence similarity 111, member B	-2.38716	8.59163	-18.4981	1.62508e-06	0.0008672	6.08876	7.2669	7.5292	9.86936	9.70105
16859205	NR_015379	UCA1	urothelial cancer associated 1 (non-protein coding)	2.20022	7.6654	18.4972	1.62555e-06	0.0008672	6.0885	8.74326	8.78776	6.43769	6.69288
16661544	NM_031459	SESN2	sestrin 2	1.71341	7.36514	18.4178	1.66735e-06	0.0008672	6.06547	8.21637	8.22732	6.52514	6.49173
16698590	NM_052934	SLC26A9	solute carrier family 26 (anion exchanger), member 9	1.9196	6.93807	18.1713	1.80534e-06	0.000870898	5.99308	7.82514	7.97061	6.02853	5.92802
16962661	NM_021101	CLDN1	claudin 1	1.72992	8.4169	17.9235	1.95766e-06	0.000870898	5.91892	9.26956	9.29415	7.5057	7.59818
16967863	NM_001657	AREG	amphiregulin	2.23239	5.98255	17.8616	1.99807e-06	0.000870898	5.90015	7.23503	6.96246	4.81524	4.91748
16833327	NM_144975	SLFN5	schlafen family member 5	1.666	9.20641	17.8181	2.02698e-06	0.000870898	5.88693	10.0231	10.0557	8.39089	8.35592
16666055	ENST00000346806	CTH	cystathionine gamma-lyase	1.74144	5.92838	17.3244	2.3921e-06	0.000924702	5.73364	6.73189	6.86633	5.0693	5.04603
16676183	NM_001001396	ATP2B4	ATPase, Ca++ transporting, plasma membrane 4	1.69179	7.13714	17.2717	2.43539e-06	0.000924702	5.71694	7.92733	8.03874	6.29602	6.28647
16941024	NM_001005914	SEMA3B	sema domain, immunoglobulin domain (Ig), short basic domain, secreted, (semaphorin) 3B	1.6396	8.7861	16.9412	2.72888e-06	0.000924702	5.61052	9.58051	9.63128	7.92388	8.00871
16844099	NM_000723	CACNB1	calcium channel, voltage-dependent, beta 1 subunit	2.19617	8.08978	16.8917	2.7763e-06	0.000924702	5.59434	9.21521	9.16053	6.83586	7.14753
17076726	NM_000930	PLAT	plasminogen activator, tissue	1.85404	7.63759	16.8833	2.78442e-06	0.000924702	5.59159	8.57735	8.55187	6.81231	6.60882
16917183	NM_000214	JAG1	jagged 1	1.74143	8.15854	16.8633	2.8039e-06	0.000924702	5.58504	9.05571	9.00279	7.36287	7.21278
16989636	NM_005733	KIF20A	kinesin family member 20A	-1.70832	8.82461	-16.817	2.84961e-06	0.000924702	5.56983	8.02316	7.91774	9.62858	9.72896
17005582	BC056264	HIST1H2BF	histone cluster 1, H2bf	-2.11018	5.86962	-16.7662	2.9008e-06	0.000924702	5.55306	4.67215	4.95691	6.96439	6.88503
16692297	NM_005399	PRKAB2	protein kinase, AMP-activated, beta 2 non-catalytic subunit	1.97648	7.65777	16.6042	3.07133e-06	0.000948464	5.49914	8.53401	8.75801	6.60401	6.73505
16789149	NM_006291	TNFAIP2	tumor necrosis factor, alpha-induced protein 2	1.60757	7.98882	16.3496	3.36357e-06	0.00100724	5.41295	8.83703	8.74818	7.22208	7.148
16984032	NM_001243120	SKP2	S-phase kinase-associated protein 2, E3 ubiquitin protein ligase	-1.56081	8.55913	-16.1265	3.64637e-06	0.00102293	5.336	7.79707	7.76038	9.29362	9.38546
16686201	NM_001024845	SLC6A9	solute carrier family 6 (neurotransmitter transporter, glycine), member 9	1.6261	8.26509	15.9611	3.8741e-06	0.00102293	5.27802	9.15191	9.00436	7.44611	7.45797
17016499	NM_005322	HIST1H1B	histone cluster 1, H1b	-1.68523	8.92133	-15.8404	4.05066e-06	0.00102293	5.23523	8.03281	8.12462	9.6853	9.8426
16910618	NM_006462	RBCK1	RanBP-type and C3HC4-type zinc finger containing 1	1.61016	9.29889	15.8201	4.08129e-06	0.00102293	5.22799	10.1219	10.086	8.42243	8.56519
16677201	AF195765	DTL	denticleless E3 ubiquitin protein ligase homolog (Drosophila)	-1.54953	8.89305	-15.7193	4.23738e-06	0.00102293	5.19186	8.07689	8.15968	9.71	9.62563
16756136	NM_013320	HCFC2	host cell factor C2	-1.44788	5.06603	-15.6464	4.35452e-06	0.00102293	5.16556	4.34182	4.34236	5.78407	5.79586
16815735	NM_000663	ABAT	4-aminobutyrate aminotransferase	1.87052	7.6038	15.5715	4.47893e-06	0.00102293	5.13835	8.53114	8.54699	6.80103	6.53604
16968122	NM_025074	FRAS1	Fraser extracellular matrix complex subunit 1	1.48752	8.15461	15.5099	4.58433e-06	0.00102293	5.11585	8.92686	8.86987	7.37728	7.44441
17016406	uc003nhl.1	HIST1H4H	histone cluster 1, H4h	-1.59068	6.36694	-15.5078	4.58788e-06	0.00102293	5.1151	5.5878	5.5554	7.23738	7.08718
16859314	NM_016270	KLF2	Kruppel-like factor 2	-1.84794	7.62651	-15.3324	4.9044e-06	0.00102293	5.05041	6.78084	6.62424	8.44197	8.659
16780859	NM_004093	EFNB2	ephrin-B2	1.89771	6.4904	15.2353	5.09056e-06	0.00102293	5.01418	7.38974	7.48876	5.40583	5.67726
16979917	NM_014331	SLC7A11	solute carrier family 7 (anionic amino acid transporter light chain, xc- system), member 11	1.6551	7.14586	15.1733	5.21372e-06	0.00102293	4.9909	7.9485	7.99833	6.41532	6.2213
17016379	ENST00000314332	HIST1H2BG	histone cluster 1, H2bg	-1.68999	6.00872	-15.1706	5.21918e-06	0.00102293	4.98988	5.27073	5.05671	6.86428	6.84314
16858137	NM_000201	ICAM1	intercellular adhesion molecule 1	1.622	8.50387	15.138	5.28531e-06	0.00102293	4.9776	9.24119	9.38856	7.75074	7.635
17002898	NM_003714	STC2	stanniocalcin 2	1.76628	9.10662	15.1269	5.30821e-06	0.00102293	4.97339	9.92759	10.0519	8.11686	8.3301
16677556	NM_001135599	TGFB2	transforming growth factor, beta 2	1.92129	7.03572	15.12	5.32239e-06	0.00102293	4.97078	7.94282	8.04991	6.21613	5.93403
16676764	NM_000574	CD55	CD55 molecule, decay accelerating factor for complement (Cromer blood group)	1.44816	7.29672	15.1197	5.32292e-06	0.00102293	4.97069	8.0024	8.0392	6.61171	6.53358
16848079	NM_017983	WIPI1	WD repeat domain, phosphoinositide interacting 1	1.65916	9.27818	15.0964	5.37137e-06	0.00102293	4.96184	10.1202	10.0954	8.55066	8.34652
17060061	NM_001178075	ASNS	asparagine synthetase (glutamine-hydrolyzing)	1.45107	8.15082	15.0909	5.38276e-06	0.00102293	4.95978	8.87181	8.88091	7.47068	7.3799
16679411	NM_003686	EXO1	exonuclease 1	-1.62667	7.37531	-15.0092	5.55673e-06	0.00103544	4.9287	6.65813	6.46581	8.20673	8.17056
16989736	NM_001964	EGR1	early growth response 1	-1.41384	10.627	-14.9153	5.76477e-06	0.00103544	4.89272	9.90753	9.9327	11.3678	11.3002
16687188	NM_001190818	ORC1	origin recognition complex, subunit 1	-1.64162	7.58753	-14.8282	5.96587e-06	0.00103544	4.8591	6.87174	6.6617	8.3997	8.41698
16926111	NM_001178008	CBS	cystathionine-beta-synthase	1.45856	6.73475	14.7744	6.09415e-06	0.00103544	4.83821	7.41554	7.51253	6.04052	5.97043
16833204	NM_002982	CCL2	chemokine (C-C motif) ligand 2	2.83288	5.06363	14.7628	6.12231e-06	0.00103544	4.83368	6.25965	6.7005	3.45708	3.83731
17019040	NM_024807	TREML2	triggering receptor expressed on myeloid cells-like 2	1.50229	8.96863	14.7424	6.17211e-06	0.00103544	4.82572	9.6827	9.75684	8.28165	8.15331
16685165	NM_001190481	CLSPN	claspin	-1.4855	7.76826	-14.7191	6.22949e-06	0.00103544	4.81661	7.0188	7.03222	8.44135	8.58066
16707695	NM_001289067	HELLS	helicase, lymphoid-specific	-1.67695	7.447	-14.6679	6.35784e-06	0.00103544	4.79655	6.5417	6.67535	8.38076	8.19019
17067314	NM_016240	SCARA3	scavenger receptor class A, member 3	-1.45346	7.05172	-14.6498	6.40397e-06	0.00103544	4.78943	6.26446	6.38551	7.79288	7.76401
17016366	NM_003513	HIST1H2AB	histone cluster 1, H2ab	-2.1009	6.84284	-14.5663	6.62169e-06	0.00103544	4.75647	5.96668	5.6181	7.97291	7.81368
16863168	NM_006509	RELB	v-rel avian reticuloendotheliosis viral oncogene homolog B	1.73744	7.16281	14.5574	6.64538e-06	0.00103544	4.75295	8.00669	8.05636	6.42233	6.16584
16665932	NM_001199741	GADD45A	growth arrest and DNA-damage-inducible, alpha	1.34891	8.97137	14.5211	6.74331e-06	0.00103544	4.73851	9.64833	9.64333	8.31197	8.28186
16832852	NM_024857	ATAD5	ATPase family, AAA domain containing 5	-1.37071	8.54396	-14.4964	6.81074e-06	0.00103544	4.72868	7.89169	7.8255	9.22086	9.23776
16816386	NM_001160364	TMC7	transmembrane channel-like 7	2.06987	7.45024	14.4412	6.96442e-06	0.00104276	4.70662	8.52078	8.44957	6.60151	6.22909
16767851	NM_203394	E2F7	E2F transcription factor 7	-1.45207	7.01789	-14.3897	7.1113e-06	0.00104616	4.68597	6.32584	6.25787	7.68282	7.80504
16857258	NM_001048201	UHRF1	ubiquitin-like with PHD and ring finger domains 1	-1.34568	8.85842	-14.3344	7.27338e-06	0.00104616	4.66365	8.21186	8.15931	9.52159	9.54093
16828886	NM_016095	GINS2	GINS complex subunit 2 (Psf2 homolog)	-1.59184	7.77435	-14.2966	7.38628e-06	0.00104616	4.64838	7.04426	6.91259	8.48546	8.65507
16681304	ENST00000467067	ERRFI1	ERBB receptor feedback inhibitor 1	1.61042	9.28729	14.2886	7.41057e-06	0.00104616	4.64512	9.98188	10.2031	8.49641	8.46774
17016506	NM_003546	HIST1H4L	histone cluster 1, H4l	-1.53546	10.1532	-14.144	7.86423e-06	0.00109457	4.5861	9.28769	9.48333	10.9099	10.932
16692632	NM_003528	HIST2H2BE	histone cluster 2, H2be	-1.4508	7.42527	-14.0786	8.07997e-06	0.00110898	4.55916	6.62811	6.77163	8.11831	8.18304
16799739	ENST00000446533	CHAC1	ChaC, cation transport regulator homolog 1 (E. coli)	1.72344	7.21992	13.9859	8.39793e-06	0.00113683	4.52069	8.11375	8.04953	6.49549	6.22091
17009620	NM_014051	TMEM14A	transmembrane protein 14A	-1.31621	7.3123	-13.9381	8.56739e-06	0.00114409	4.50075	6.65346	6.65493	7.93729	8.00352
17024980	NM_001142522	FBXO5	F-box protein 5	-1.28704	5.45235	-13.8161	9.01834e-06	0.00118826	4.44946	4.79364	4.82401	6.0837	6.10804
16824572	ENST00000300571	GPRC5B	G protein-coupled receptor, class C, group 5, member B	1.51375	6.99387	13.6669	9.6079e-06	0.00123133	4.38598	7.78873	7.71275	6.13853	6.33545
17012946	NM_001270507	TNFAIP3	tumor necrosis factor, alpha-induced protein 3	2.19253	5.72755	13.6303	9.75961e-06	0.00123133	4.37025	6.64584	7.00179	4.77357	4.489
16730522	ENST00000263464	BIRC3	baculoviral IAP repeat containing 3	2.44806	6.81632	13.5912	9.92406e-06	0.00123133	4.35346	7.77487	8.30582	5.55869	5.62588
16751438	ENST00000550557	NR4A1	nuclear receptor subfamily 4, group A, member 1	1.58962	6.60807	13.5826	9.96105e-06	0.00123133	4.34972	7.40098	7.40479	5.93743	5.6891
16756310	ENST00000546625	TCP11L2	t-complex 11, testis-specific-like 2	1.26432	5.72282	13.5809	9.96824e-06	0.00123133	4.34899	6.34072	6.36924	5.07875	5.10258
16929615	NM_030641	APOL6	apolipoprotein L, 6	1.28782	7.06181	13.4695	1.04582e-05	0.0012759	4.3007	7.67642	7.73502	6.44805	6.38776
16944344	NM_020754	ARHGAP31	Rho GTPase activating protein 31	2.22145	6.83568	13.4196	1.0687e-05	0.00128791	4.27889	7.86113	8.03169	5.50309	5.94682
16885638	NM_015320	ARHGEF4	Rho guanine nucleotide exchange factor (GEF) 4	1.25777	6.40682	13.3897	1.08269e-05	0.00128905	4.26577	7.03002	7.04138	5.80594	5.74993
16911108	NM_001270691	SMOX	spermine oxidase	1.35548	7.5535	13.3026	1.12459e-05	0.00130116	4.22743	8.15727	8.30522	6.87176	6.87976
17080595	NM_024094	DSCC1	DNA replication and sister chromatid cohesion 1	-1.33953	6.66726	-13.2512	1.15023e-05	0.00130116	4.20463	5.9496	6.0454	7.38901	7.28504
16735921	OTTHUMT00000386174	RP11-265D17.2	novel transcript	1.55629	7.04843	13.2405	1.15566e-05	0.00130116	4.19987	7.70194	7.95119	6.25462	6.28594
16674845	NM_005562	LAMC2	laminin, gamma 2	1.22444	9.34036	13.2093	1.17163e-05	0.00130116	4.18598	9.94956	9.9556	8.71749	8.73879
16823215	NM_022119	PRSS22	protease, serine, 22	1.22577	7.86533	13.2028	1.175e-05	0.00130116	4.18308	8.49215	8.46427	7.24935	7.25554
16705439	NM_001130161	STOX1	storkhead box 1	-1.46437	5.54535	-13.1921	1.18056e-05	0.00130116	4.17829	4.71458	4.91175	6.3173	6.23777
17021845	NM_198468	MMS22L	MMS22-like, DNA repair protein	-1.25922	6.78694	-13.1833	1.18515e-05	0.00130116	4.17436	6.18863	6.12604	7.44365	7.38945
16736453	NM_001127380	SAA2	serum amyloid A2	1.74356	7.61549	13.1585	1.19819e-05	0.00130116	4.16328	8.34981	8.62474	6.65374	6.83368
16791991	NM_020529	NFKBIA	nuclear factor of kappa light polypeptide gene enhancer in B-cells inhibitor, alpha	1.35329	8.22736	13.1139	1.22212e-05	0.00131271	4.14324	8.96175	8.84626	7.49637	7.60506
16978568	NM_001286734	CENPE	centromere protein E, 312kDa	-1.21994	7.78872	-13.054	1.25508e-05	0.00132349	4.11623	7.16207	7.19543	8.38234	8.41504
16685868	NM_133467	CITED4	Cbp/p300-interacting transactivator, with Glu/Asp-rich carboxy-terminal domain, 4	1.42131	8.27764	13.0471	1.25894e-05	0.00132349	4.11312	8.96713	9.00946	7.46958	7.6644
16778849	NM_002298	LCP1	lymphocyte cytosolic protein 1 (L-plastin)	1.31859	6.36675	12.9885	1.29236e-05	0.00133015	4.0865	6.98772	7.06437	5.76902	5.64589
16863041	ENST00000403534	BCL3	B-cell CLL/lymphoma 3	1.34134	6.61179	12.9732	1.30122e-05	0.00133015	4.07955	7.26148	7.30344	5.86385	6.01838
16658192	NM_001126240	TP73	tumor protein p73	-1.30127	6.55973	-12.9656	1.30565e-05	0.00133015	4.0761	5.84215	5.97605	7.20161	7.21914
16868838	NM_182513	SPC24	SPC24, NDC80 kinetochore complex component	-1.53695	7.81889	-12.935	1.3237e-05	0.00133477	4.06214	7.17951	6.92132	8.58317	8.59155
17050381	NM_001007245	IFRD1	interferon-related developmental regulator 1	1.21002	8.04837	12.9012	1.34401e-05	0.00134157	4.04664	8.65783	8.64893	7.41662	7.47011
17005865	NM_003521	HIST1H2BM	histone cluster 1, H2bm	-2.14333	11.0189	-12.852	1.3742e-05	0.00134719	4.02402	9.73427	10.1601	12.2018	11.9792
16725049	NM_001142519	FAM111A	family with sequence similarity 111, member A	-1.1968	7.40875	-12.8476	1.37691e-05	0.00134719	4.02201	6.79186	6.82885	8.00118	8.01312
17115777	NM_171998	RAB39B	RAB39B, member RAS oncogene family	1.23203	7.0421	12.8077	1.40206e-05	0.00135835	4.00356	7.67214	7.64408	6.38242	6.46975
17016383	NM_003539	HIST1H4D	histone cluster 1, H4d	-1.40223	7.46731	-12.773	1.42428e-05	0.00136648	3.98752	6.69415	6.83824	8.09563	8.24123
16743432	NM_001271594	SESN3	sestrin 3	-1.38255	5.83988	-12.7314	1.45153e-05	0.00137923	3.96818	5.24706	5.05014	6.53556	6.52674
16691121	NM_001010922	BCL2L15	BCL2-like 15	-1.21172	9.05732	-12.6947	1.47607e-05	0.00138171	3.95106	8.45731	8.44561	9.62265	9.7037
16708089	NM_001010917	GOLGA7B	golgin A7 family, member B	1.86656	7.09361	12.6668	1.49506e-05	0.00138171	3.938	8.05627	7.99751	5.9639	6.35677
16777756	NM_001135919	SLC46A3	solute carrier family 46, member 3	-1.48124	5.88628	-12.6317	1.51935e-05	0.00138171	3.92151	5.11072	5.1806	6.50706	6.74674
17111594	NM_001012968	SPIN4	spindlin family, member 4	-1.18172	7.79276	-12.6251	1.5239e-05	0.00138171	3.91845	7.22546	7.17835	8.39216	8.37508
16877019	NM_001034	RRM2	ribonucleotide reductase M2	-1.18644	9.19461	-12.6249	1.52405e-05	0.00138171	3.91835	8.59054	8.61224	9.76097	9.81469
16754177	NM_018279	TMEM19	transmembrane protein 19	-1.28383	5.42562	-12.6024	1.53996e-05	0.00138344	3.90773	4.79364	4.77377	6.14085	5.99422
17110040	NM_031442	TMEM47	transmembrane protein 47	1.17411	10.2241	12.5377	1.5866e-05	0.00140666	3.87718	10.7868	10.8356	9.64468	9.62945
17027710	NM_001077511	TCF19	transcription factor 19	-1.29232	7.10237	-12.5273	1.59427e-05	0.00140666	3.87224	6.50356	6.40885	7.6851	7.81196
16692834	ENST00000448301	CTSS	cathepsin S	1.38679	5.32966	12.4294	1.66852e-05	0.00145467	3.82556	5.9422	6.10392	4.56456	4.70797
16745997	NM_001143820	ETS1	v-ets avian erythroblastosis virus E26 oncogene homolog 1	1.3558	8.30008	12.4148	1.67987e-05	0.00145467	3.81859	8.99387	8.9621	7.52287	7.72149
17125034	ENST00000518311	ASNSP1	asparagine synthetase pseudogene 1	1.39087	9.06891	12.3698	1.71564e-05	0.00145467	3.79696	9.78406	9.74463	8.48245	8.26452
17053892	NM_005542	INSIG1	insulin induced gene 1	1.19982	8.81882	12.3426	1.73764e-05	0.00145467	3.78386	9.40039	9.43707	8.26744	8.17037
16669437	NR_027337	HIST2H2BA	histone cluster 2, H2ba (pseudogene)	-1.19742	10.2982	-12.3394	1.74032e-05	0.00145467	3.78228	9.66235	9.73654	10.9318	10.862
16773086	NM_002010	FGF9	fibroblast growth factor 9	1.34037	6.30324	12.3345	1.74433e-05	0.00145467	3.77991	6.90515	7.0417	5.70447	5.56163
16800355	NM_001167941	WDR76	WD repeat domain 76	-1.23404	7.31195	-12.3178	1.75804e-05	0.00145467	3.77186	6.63064	6.75921	7.94682	7.91111
17048102	NM_001039706	C7orf63	chromosome 7 open reading frame 63	1.25044	5.00863	12.3077	1.76645e-05	0.00145467	3.76695	5.69956	5.56815	4.41488	4.35195
16938271	NM_003884	KAT2B	K(lysine) acetyltransferase 2B	-1.14921	5.94972	-12.2593	1.80722e-05	0.00146657	3.74347	5.37658	5.37364	6.55089	6.49776
16965346	NM_022346	NCAPG	non-SMC condensin I complex, subunit G	-1.24943	9.66857	-12.2553	1.81059e-05	0.00146657	3.74156	8.98028	9.10743	10.3318	10.2548
16842673	NM_006461	SPAG5	sperm associated antigen 5	-1.16845	8.58886	-12.2336	1.82927e-05	0.00146966	3.73099	7.97576	8.03351	9.2027	9.14346
16929573	ENST00000216122	MCM5	minichromosome maintenance complex component 5	-1.23427	9.00944	-12.2149	1.84561e-05	0.00147083	3.72183	8.46242	8.32218	9.61917	9.63397
17081002	NM_174911	FAM84B	family with sequence similarity 84, member B	1.28455	8.1181	12.1691	1.88622e-05	0.00149117	3.6994	8.82674	8.694	7.5338	7.41785
16777278	NM_001166017	SKA3	spindle and kinetochore associated complex subunit 3	-1.2078	8.88018	-12.0944	1.95465e-05	0.00151286	3.66264	8.21768	8.33488	9.51281	9.45534
16830754	NM_001080424	KDM6B	lysine (K)-specific demethylase 6B	1.41705	7.92471	12.086	1.96248e-05	0.00151286	3.65851	8.56549	8.70098	7.11139	7.32097
16847771	NM_001433	1	endoplasmic reticulum to nucleus signaling 1	1.24318	6.80013	12.0826	1.96571e-05	0.00151286	3.65681	7.34417	7.49927	6.16935	6.18772
16752908	NM_004990	MARS	methionyl-tRNA synthetase	1.14178	9.54462	12.0701	1.97753e-05	0.00151286	3.65062	10.0987	10.1323	8.94361	9.00385
16697544	NM_001206846	ASPM	asp (abnormal spindle) homolog, microcephaly associated (Drosophila)	-1.18201	8.76161	-12.0395	2.00674e-05	0.00151286	3.63547	8.17711	8.16408	9.40933	9.2959
16877007	NM_001177716	KLF11	Kruppel-like factor 11	1.17518	8.46545	12.0306	2.01539e-05	0.00151286	3.63103	9.08454	9.02155	7.83341	7.92232
17001763	NM_001252385	TNIP1	TNFAIP3 interacting protein 1	1.13113	7.34746	12.025	2.02082e-05	0.00151286	3.62825	7.897	7.92904	6.75674	6.80704
16796694	NM_004184	WARS	tryptophanyl-tRNA synthetase	1.17092	8.07784	12.0085	2.03687e-05	0.00151341	3.62007	8.61031	8.71629	7.49997	7.48479
16996771	NM_019072	SGTB	small glutamine-rich tetratricopeptide repeat (TPR)-containing, beta	1.13174	7.97255	11.9712	2.07388e-05	0.00152941	3.60145	8.56522	8.51162	7.42763	7.38573
16993719	NM_001284351	SLC9A3	solute carrier family 9, subfamily A (NHE3, cation proton antiporter 3), member 3	1.42325	6.90881	11.9451	2.10022e-05	0.00153374	3.58839	7.57827	7.66261	6.32024	6.07415
17103303	NM_001282167	PORCN	porcupine homolog (Drosophila)	1.12081	8.85516	11.9319	2.11375e-05	0.00153374	3.58175	9.38712	9.44402	8.29722	8.29229
16847432	NM_032043	BRIP1	BRCA1 interacting protein C-terminal helicase 1	-1.16378	7.82981	-11.9093	2.137e-05	0.00153374	3.57042	7.21024	7.28561	8.45133	8.37208
16796414	NM_152592	SYNE3	spectrin repeat containing, nuclear envelope family member 3	1.10361	7.64326	11.8868	2.16052e-05	0.00153374	3.55909	8.19591	8.19422	7.07717	7.10575
16747014	NM_001130862	RAD51AP1	RAD51 associated protein 1	-1.15316	6.78604	-11.8754	2.17252e-05	0.00153374	3.55335	6.16388	6.25505	7.38614	7.33911
16725065	NM_015177	DTX4	deltex 4, E3 ubiquitin ligase	1.41807	6.11609	11.8751	2.17287e-05	0.00153374	3.55318	6.93834	6.71189	5.34156	5.47254
17043982	NM_002214	ITGB8	integrin, beta 8	1.39543	7.5235	11.848	2.20168e-05	0.00154305	3.53953	8.32623	8.11621	6.75567	6.89591
16869588	ENST00000263382	ASF1B	anti-silencing function 1B histone chaperone	-1.39434	8.21749	-11.821	2.23094e-05	0.00154836	3.52584	7.49572	7.54491	9.03901	8.7903
16722081	NM_001282663	MICAL2	microtubule associated monooxygenase, calponin and LIM domain containing 2	1.31305	7.26719	11.8122	2.24059e-05	0.00154836	3.52137	7.91	7.93743	6.71657	6.50475
16912167	NM_002862	PYGB	phosphorylase, glycogen; brain	1.23438	10.2103	11.7737	2.28321e-05	0.00156686	3.50182	10.85	10.805	9.51058	9.67563
16670401	NM_003517	HIST2H2AC	histone cluster 2, H2ac	-1.14653	11.7658	-11.753	2.30657e-05	0.00157197	3.49126	11.1432	11.2418	12.3176	12.3605
16667037	NM_001134419	CDC7	cell division cycle 7	-1.12634	7.1014	-11.7057	2.36093e-05	0.00159111	3.46706	6.54427	6.53219	7.61893	7.71021
16903090	NM_005915	MCM6	minichromosome maintenance complex component 6	-1.11111	9.08983	-11.7006	2.36687e-05	0.00159111	3.46446	8.50309	8.56547	9.62478	9.666
16889251	NM_001160033	SGOL2	shugoshin-like 2 (S. pombe)	-1.17009	6.06305	-11.6857	2.38427e-05	0.00159199	3.45684	5.53552	5.4205	6.68144	6.61476
16700673	NM_001077397	IRF2BP2	interferon regulatory factor 2 binding protein 2	1.07939	8.91315	11.6538	2.42221e-05	0.00160065	3.44043	9.45791	9.44778	8.36598	8.38093
16868847	NM_001136191	KANK2	KN motif and ankyrin repeat domains 2	-1.14827	7.24597	-11.6241	2.45817e-05	0.00160065	3.42511	6.61376	6.72991	7.80449	7.83573
16799793	NM_001243142	NUSAP1	nucleolar and spindle associated protein 1	-1.14034	9.37354	-11.6235	2.45884e-05	0.00160065	3.42482	8.85108	8.75567	9.91304	9.97438
16875237	OTTHUMT00000134433	AC008440.5	putative novel transcript	1.15932	7.56557	11.6208	2.46215e-05	0.00160065	3.42342	8.09296	8.19751	7.0242	6.94762
16826160	NM_024745	SHCBP1	SHC SH2-domain binding protein 1	-1.12237	7.94109	-11.6077	2.47823e-05	0.00160065	3.41665	7.42464	7.33516	8.522	8.48254
17074815	NM_152271	LONRF1	LON peptidase N-terminal domain and ring finger 1	1.15536	6.56415	11.5918	2.49801e-05	0.00160294	3.40838	7.11662	7.16705	6.0457	5.92723
16708623	NM_001077494	NFKB2	nuclear factor of kappa light polypeptide gene enhancer in B-cells 2 (p49/p100)	1.49485	7.67943	11.5787	2.51431e-05	0.00160299	3.40161	8.46739	8.38631	7.0826	6.7814
16692636	NM_175065	HIST2H2AB	histone cluster 2, H2ab	-1.14811	9.00509	-11.5094	2.60287e-05	0.00164882	3.36555	8.47365	8.38842	9.53038	9.62791
17075973	NM_057158	DUSP4	dual specificity phosphatase 4	1.09785	6.52187	11.4712	2.6533e-05	0.00167006	3.34554	7.03189	7.10971	5.99051	5.95539
16669087	NM_018420	SLC22A15	solute carrier family 22, member 15	1.3063	5.37018	11.4469	2.68588e-05	0.00167986	3.33282	6.08977	5.95689	4.62223	4.81183
17070008	OTTHUMT00000379313	RP11-531A24.5	novel transcript	-1.06891	5.68518	-11.422	2.7198e-05	0.00169038	3.31972	5.15315	5.14829	6.19488	6.24438
16744125	NM_153705	KDELC2	KDEL (Lys-Asp-Glu-Leu) containing 2	-1.06625	8.71263	-11.4078	2.7394e-05	0.00169192	3.31222	8.15601	8.20301	9.24652	9.24499
16698489	NM_001001552	LEMD1	LEM domain containing 1	1.18196	5.43374	11.3503	2.82026e-05	0.00171978	3.28185	5.94211	6.10733	4.84958	4.83594
16799598	NM_144508	CASC5	cancer susceptibility candidate 5	-1.17	8.44194	-11.3279	2.85257e-05	0.00171978	3.26994	7.78617	7.92771	8.99042	9.06347
17097661	NM_002160	TNC	tenascin C	1.37839	8.17068	11.3201	2.86387e-05	0.00171978	3.26581	8.96397	8.75578	7.39221	7.57077
16935228	ENST00000331163	PDGFB	platelet-derived growth factor beta polypeptide	1.12344	8.65195	11.3011	2.89171e-05	0.00171978	3.25569	9.1526	9.27475	8.10631	8.07416
17089868	NM_001127244	LRRC8A	leucine rich repeat containing 8 family, member A	1.15536	7.06907	11.2951	2.9007e-05	0.00171978	3.25245	7.63533	7.65817	6.56621	6.41656
16755542	ENST00000547045	APAF1	apoptotic peptidase activating factor 1	-1.12643	7.05205	-11.2933	2.90337e-05	0.00171978	3.25149	6.45003	6.52765	7.66705	7.56348
16707468	NM_004523	KIF11	kinesin family member 11	-1.05244	9.25282	-11.2913	2.90632e-05	0.00171978	3.25042	8.73623	8.71696	9.7968	9.76127
16852445	NM_001288980	C18orf54	chromosome 18 open reading frame 54	-1.1836	5.73229	-11.2757	2.92944e-05	0.00172314	3.24213	5.13766	5.14333	6.41003	6.23815
17118166	NM_001257273	ZNF451	zinc finger protein 451	-1.145	7.31257	-11.2394	2.98438e-05	0.00174507	3.22269	6.76467	6.71546	7.95485	7.81529
17105401	NM_006733	CENPI	centromere protein I	-1.30255	8.11055	-11.2249	3.00666e-05	0.00174776	3.21491	7.35825	7.5603	8.82906	8.69459
16662322	NM_001005752	GJB3	gap junction protein, beta 3, 31kDa	1.13411	7.94211	11.1574	3.11287e-05	0.00179891	3.17855	8.51924	8.49909	7.3027	7.44741
16929442	NM_000362	TIMP3	TIMP metallopeptidase inhibitor 3	1.1276	8.64444	11.0922	3.21951e-05	0.00184188	3.14323	9.27911	9.13737	8.09852	8.06275
17020019	NM_001270472	MCM3	minichromosome maintenance complex component 3	-1.0528	9.55551	-11.0892	3.22449e-05	0.00184188	3.14161	9.06195	8.99626	10.0644	10.0994
17080749	NM_014109	ATAD2	ATPase family, AAA domain containing 2	-1.1889	8.86074	-11.0763	3.2462e-05	0.0018429	3.13457	8.19501	8.33758	9.3934	9.51698
17078539	NM_001033723	ZNF704	zinc finger protein 704	-1.02392	8.57588	-11.066	3.26359e-05	0.0018429	3.12896	8.06683	8.061	9.09249	9.08319
16773662	NM_001204406	ALOX5AP	arachidonate 5-lipoxygenase-activating protein	1.61353	6.30236	11.0464	3.297e-05	0.00185119	3.11827	6.96641	7.25184	5.62957	5.36162
16844312	NM_001067	TOP2A	topoisomerase (DNA) II alpha 170kDa	-1.02487	10.9113	-11.0296	3.32604e-05	0.00185694	3.10906	10.3876	10.41	11.4348	11.4127
16991859	NM_001142556	HMMR	hyaluronan-mediated motility receptor (RHAMM)	-1.16416	8.24624	-11.0095	3.36101e-05	0.00186593	3.09808	7.58968	7.73865	8.87662	8.78002
16914297	NM_052951	DNTTIP1	deoxynucleotidyltransferase, terminal, interacting protein 1	1.03123	11.5232	10.9879	3.39921e-05	0.00187659	3.08621	12.0663	12.0114	11.0039	11.0113
16841561	NM_000304	PMP22	peripheral myelin protein 22	1.14332	7.97611	10.9564	3.45566e-05	0.00189641	3.0689	8.62414	8.4714	7.37018	7.43871
16873060	NM_001005376	PLAUR	plasminogen activator, urokinase receptor	1.12799	9.09544	10.9466	3.47349e-05	0.00189641	3.06349	9.58088	9.73799	8.52662	8.53627
16660014	NM_013358	PADI1	peptidyl arginine deiminase, type I	1.12888	8.43832	10.9005	3.5587e-05	0.00192604	3.038	9.06008	8.94546	7.81705	7.93072
17005396	NM_001251989	GMNN	geminin, DNA replication inhibitor	-1.08847	7.20992	-10.8943	3.57042e-05	0.00192604	3.03454	6.68212	6.64925	7.81754	7.69076
16745139	OTTHUMT00000389662	RP11-110I1.12	novel transcript	-1.60891	6.04202	-10.8823	3.59309e-05	0.00192604	3.02788	5.06613	5.409	6.74404	6.94891
16766403	NM_001130963	TMEM194A	transmembrane protein 194A	-1.12145	9.00591	-10.8697	3.61706e-05	0.00192604	3.02088	8.37532	8.51505	9.60394	9.52933
16734526	NM_001014437	CARS	cysteinyl-tRNA synthetase	1.16681	7.75905	10.8654	3.62522e-05	0.00192604	3.01851	8.27166	8.41324	7.11302	7.23826
16917054	NM_152611	LRRN4	leucine rich repeat neuronal 4	-1.03402	9.36088	-10.8403	3.6737e-05	0.00194136	3.00452	8.81638	8.87136	9.84816	9.90762
16697018	NM_002928	RGS16	regulator of G-protein signaling 16	1.15189	6.62046	10.8213	3.71079e-05	0.00194452	2.99394	7.10966	7.28315	6.07289	6.01615
16933535	NM_001079539	XBP1	X-box binding protein 1	1.1079	7.47186	10.8135	3.72622e-05	0.00194452	2.98957	7.95108	8.10055	6.93359	6.90223
16795794	NM_004755	RPS6KA5	ribosomal protein S6 kinase, 90kDa, polypeptide 5	1.01851	8.55712	10.8053	3.74254e-05	0.00194452	2.98497	9.04356	9.08919	8.02597	8.06975
17041697	NM_001134870	PPP1R18	protein phosphatase 1, regulatory subunit 18	1.12216	8.82898	10.7973	3.75838e-05	0.00194452	2.98052	9.32667	9.45345	8.3201	8.2157
16860644	NM_001252296	CEBPG	CCAAT/enhancer binding protein (C/EBP), gamma	1.47898	8.31299	10.7741	3.80507e-05	0.00195842	2.9675	8.93225	9.1727	7.70152	7.44547
17063428	NM_020119	ZC3HAV1	zinc finger CCCH-type, antiviral 1	-1.06848	8.83814	-10.7521	3.85007e-05	0.00197132	2.95511	8.35542	8.25238	9.33614	9.40862
16821790	NM_001127464	ZNF469	zinc finger protein 469	1.17231	5.39563	10.7311	3.89347e-05	0.00198326	2.94329	5.99214	5.97143	4.70932	4.90964
16718230	NR_039702	MIR4482	microRNA 4482	1.20635	5.35035	10.702	3.95459e-05	0.00199406	2.92686	5.89433	6.01272	4.84177	4.65258
17067963	ENST00000338825	EIF4EBP1	eukaryotic translation initiation factor 4E binding protein 1	1.00469	8.6069	10.6781	4.00551e-05	0.00199406	2.91335	9.08061	9.13787	8.11366	8.09545
16692918	NM_001040217	FAM63A	family with sequence similarity 63, member A	-1.25327	5.94493	-10.6741	4.01401e-05	0.00199406	2.91112	5.2969	5.33969	6.44816	6.69497
16724471	NM_000107	DDB2	damage-specific DNA binding protein 2, 48kDa	-1.04392	7.74097	-10.6714	4.02e-05	0.00199406	2.90954	7.19908	7.23895	8.21142	8.31444
17072669	NM_002467	MYC	v-myc avian myelocytomatosis viral oncogene homolog	1.07529	10.277	10.668	4.02727e-05	0.00199406	2.90763	10.7927	10.8366	9.67349	9.80524
17077826	NM_001080416	MYBL1	v-myb avian myeloblastosis viral oncogene homolog-like 1	-1.03603	6.92902	-10.6607	4.04317e-05	0.00199406	2.90348	6.46084	6.36116	7.46091	7.43316
17047985	NM_021722	ADAM22	ADAM metallopeptidase domain 22	-1.08334	7.36805	-10.6548	4.05592e-05	0.00199406	2.90015	6.76866	6.8841	7.95469	7.86475
17111895	NM_000206	IL2RG	interleukin 2 receptor, gamma	0.992365	5.98415	10.6288	4.1132e-05	0.00200294	2.88534	6.49624	6.46443	5.50358	5.47236
17122478	XR_249188	LOC101930489	uncharacterized LOC101930489	1.13251	6.31484	10.623	4.12614e-05	0.00200294	2.88202	6.90139	6.86079	5.83815	5.65902
16852812	NM_002639	SERPINB5	serpin peptidase inhibitor, clade B (ovalbumin), member 5	1.02382	5.75031	10.6191	4.1348e-05	0.00200294	2.87981	6.29585	6.22859	5.20525	5.27155
16820486	NM_004360	CDH1	cadherin 1, type 1, E-cadherin (epithelial)	0.988911	9.43154	10.5559	4.27842e-05	0.00205714	2.84371	9.93636	9.91563	8.91328	8.96089
16675975	NM_001017403	LGR6	leucine-rich repeat containing G protein-coupled receptor 6	1.03103	7.61709	10.5517	4.2883e-05	0.00205714	2.84127	8.1754	8.0898	7.13554	7.0676
16793225	NM_001146015	DLGAP5	discs, large (Drosophila) homolog-associated protein 5	-0.981627	8.24013	-10.5338	4.33017e-05	0.00206085	2.831	7.75622	7.7424	8.74963	8.71224
16916958	NM_002592	PCNA	proliferating cell nuclear antigen	-1.16225	10.2008	-10.5243	4.35258e-05	0.00206085	2.82554	9.55939	9.6799	10.8673	10.6965
16721126	NM_001033	RRM1	ribonucleotide reductase M1	-0.974227	9.48871	-10.5218	4.35862e-05	0.00206085	2.82407	9.00782	8.99537	9.9707	9.98095
16780069	ENST00000377102	SPRY2	sprouty homolog 2 (Drosophila)	0.976093	6.37694	10.4773	4.46564e-05	0.0021014	2.7984	6.88399	6.84598	5.89359	5.88419
16756627	NM_003362	UNG	uracil-DNA glycosylase	-1.15403	8.59444	-10.447	4.54019e-05	0.00212382	2.78087	8.0751	7.95976	9.25873	9.08419
17086193	NM_021154	PSAT1	phosphoserine aminotransferase 1	0.971392	10.6098	10.4405	4.55627e-05	0.00212382	2.77712	11.0959	11.0952	10.1064	10.1419
16952414	NM_033027	CSRNP1	cysteine-serine-rich nuclear protein 1	-1.01644	5.57553	-10.3986	4.66239e-05	0.00216309	2.75273	5.12211	5.01251	6.08558	6.08192
16988703	NM_005573	LMNB1	lamin B1	-1.0292	9.51913	-10.3828	4.70301e-05	0.00216987	2.74353	8.95249	9.05657	10.0671	10.0004
16716590	NM_013451	MYOF	myoferlin	0.986234	10.0033	10.3744	4.72485e-05	0.00216987	2.73862	10.509	10.4837	9.54614	9.47414
16707221	NM_001284259	KIF20B	kinesin family member 20B	-1.10006	8.30183	-10.3632	4.75408e-05	0.00216987	2.73208	7.66195	7.84165	8.86013	8.84359
16850477	NM_001071	TYMS	thymidylate synthetase	-0.987514	10.0892	-10.3529	4.78126e-05	0.00216987	2.72604	9.61126	9.57959	10.6202	10.5457
17087413	NM_024642	GALNT12	polypeptide N-acetylgalactosaminyltransferase 12	-1.19889	6.62128	-10.3508	4.7868e-05	0.00216987	2.72481	6.13733	5.90635	7.25595	7.18551
16698984	NM_001204182	NEK2	NIMA-related kinase 2	-0.973881	6.86655	-10.3397	4.81635e-05	0.0021733	2.71828	6.3928	6.36641	7.32547	7.38151
16730540	NM_001166	BIRC2	baculoviral IAP repeat containing 2	1.22173	7.51567	10.2964	4.93308e-05	0.00219225	2.69287	8.01623	8.23685	6.97113	6.83848
17019805	NM_014452	TNFRSF21	tumor necrosis factor receptor superfamily, member 21	0.956741	8.91773	10.291	4.948e-05	0.00219225	2.68967	9.38208	9.41013	8.4482	8.43053
17125226	OTTHUMT00000129789	RP11-146D12.2	novel protein	-0.953564	5.71588	-10.2871	4.95879e-05	0.00219225	2.68735	5.24958	5.22862	6.18906	6.19626
17047918	NM_001143935	CROT	carnitine O-octanoyltransferase	-0.994297	6.30569	-10.2811	4.97514e-05	0.00219225	2.68386	5.84927	5.76782	6.83012	6.77557
16931766	NM_138433	KLHDC7B	kelch domain containing 7B	1.19237	5.37566	10.2801	4.97804e-05	0.00219225	2.68324	5.86986	6.07383	4.71398	4.84498
16799315	NM_003246	THBS1	thrombospondin 1	0.970029	7.6586	10.2752	4.99146e-05	0.00219225	2.68038	8.11924	8.16798	7.15151	7.19566
16882975	NM_001281710	NCAPH	non-SMC condensin I complex, subunit H	-1.00306	8.4092	-10.2508	5.05971e-05	0.00221239	2.66596	7.93213	7.88322	8.86104	8.96042
16741725	NM_001143839	PDE2A	phosphodiesterase 2A, cGMP-stimulated	1.24675	5.97304	10.2282	5.12397e-05	0.002224	2.65255	6.45909	6.73375	5.34328	5.35606
16747287	NM_014865	NCAPD2	non-SMC condensin I complex, subunit D2	-0.952633	9.76219	-10.2257	5.13126e-05	0.002224	2.65104	9.2717	9.30004	10.252	10.225
17087716	NM_001042550	SMC2	structural maintenance of chromosomes 2	-0.954504	8.96273	-10.2079	5.18255e-05	0.00222662	2.64048	8.50162	8.46933	9.45773	9.42224
16725735	NM_004111	FEN1	flap structure-specific endonuclease 1	-1.11927	8.01211	-10.2033	5.19578e-05	0.00222662	2.63777	7.53565	7.36931	8.63107	8.51243
16917114	ENST00000246024	TMX4	thioredoxin-related transmembrane protein 4	-0.978165	7.74146	-10.2002	5.20492e-05	0.00222662	2.6359	7.21773	7.28702	8.25759	8.20348
16694361	NM_001162383	ARHGEF2	Rho/Rac guanine nucleotide exchange factor (GEF) 2	1.06783	7.6668	10.1739	5.28215e-05	0.00224992	2.62024	8.16246	8.23898	7.20985	7.05593
16836624	NR_029493	MIR21	microRNA 21	1.21278	8.32537	10.1624	5.31611e-05	0.00225467	2.61343	9.00348	8.86005	7.60985	7.82812
16887463	NM_001003845	SP5	Sp5 transcription factor	-1.01521	8.21755	-10.1438	5.37223e-05	0.00226678	2.60226	7.77378	7.64611	8.7074	8.74291
17011708	AK126183	SLC16A10	solute carrier family 16 (aromatic amino acid transporter), member 10	-1.17832	6.8581	-10.1363	5.3947e-05	0.00226678	2.59782	6.22942	6.30846	7.56263	7.33189
16937741	NM_015869	PPARG	peroxisome proliferator-activated receptor gamma	1.01779	6.46284	10.1275	5.42158e-05	0.00226678	2.59253	7.03515	6.90831	5.97881	5.92907
16991991	ENST00000265293	WWC1	WW and C2 domain containing 1	0.983025	8.8561	10.1227	5.43643e-05	0.00226678	2.58962	9.39272	9.30251	8.3891	8.34009
17044056	NM_003112	SP4	Sp4 transcription factor	-1.0142	7.00797	-10.106	5.48759e-05	0.0022785	2.57965	6.44193	6.5598	7.48217	7.54796
16898578	NM_001244710	GFPT1	glutamine--fructose-6-phosphate transaminase 1	1.00474	9.43555	10.0981	5.51219e-05	0.00227914	2.57489	9.92128	9.95456	8.99453	8.87183
17047138	NM_001199207	GTF2IRD1	GTF2I repeat domain containing 1	0.969915	9.43238	10.0717	5.59505e-05	0.00229872	2.55901	9.89637	9.9383	8.98895	8.90588
16717032	NM_003061	SLIT1	slit homolog 1 (Drosophila)	1.02961	6.97241	10.0683	5.60606e-05	0.00229872	2.55692	7.5623	7.41212	6.44894	6.46625
17022736	NM_016262	TUBE1	tubulin, epsilon 1	1.55492	6.20759	10.0435	5.6854e-05	0.00232162	2.54195	7.03929	6.93081	5.22214	5.63814
16800962	NM_001159629	SLC27A2	solute carrier family 27 (fatty acid transporter), member 2	-0.944446	8.57086	-10.0304	5.72775e-05	0.00232928	2.53405	8.12398	8.07329	9.06039	9.02577
16988984	NM_001131027	PDLIM4	PDZ and LIM domain 4	0.970568	8.21044	10.0163	5.77369e-05	0.00233834	2.52553	8.64618	8.74527	7.71767	7.73265
16970906	NM_001204366	MGST2	microsomal glutathione S-transferase 2	-0.967096	5.37843	-9.99965	5.82883e-05	0.00234982	2.51541	4.85955	4.93022	5.828	5.89596
16668919	NM_152900	MAGI3	membrane associated guanylate kinase, WW and PDZ domain containing 3	-0.988439	6.464	-9.98751	5.86929e-05	0.00234982	2.50803	6.01861	5.92096	6.92159	6.99485
16787679	NM_175748	UBR7	ubiquitin protein ligase E3 component n-recognin 7 (putative)	-1.24203	7.85027	-9.98229	5.88679e-05	0.00234982	2.50486	7.10503	7.35349	8.54433	8.39825
17007810	NM_001171818	PPARD	peroxisome proliferator-activated receptor delta	0.94088	9.91411	9.96979	5.92898e-05	0.00234982	2.49725	10.4142	10.3549	9.43018	9.45716
16697750	NM_001252100	KIF21B	kinesin family member 21B	1.16153	6.39139	9.95882	5.96627e-05	0.00234982	2.49056	6.94283	7.00149	5.93013	5.69112
17121574	ENST00000453883	KRT16P4	keratin 16 pseudogene 4	1.24927	5.67294	9.95875	5.96649e-05	0.00234982	2.49052	6.39179	6.20337	4.9358	5.16081
16925798	NR_026543	C21orf88	chromosome 21 open reading frame 88	1.16613	5.57941	9.95058	5.99445e-05	0.00234982	2.48553	6.03922	6.28572	4.97786	5.01482
17093397	NM_194313	KIF24	kinesin family member 24	-0.939932	6.83241	-9.94035	6.02968e-05	0.00234982	2.47929	6.33867	6.38622	7.32692	7.27784
16956002	NM_001278689	EOGT	EGF domain-specific O-linked N-acetylglucosamine (GlcNAc) transferase	-0.948196	8.65366	-9.93864	6.03557e-05	0.00234982	2.47824	8.19852	8.1606	9.16368	9.09183
16734284	NM_001004325	KRTAP5-2	keratin associated protein 5-2	-0.992267	5.11173	-9.93741	6.03982e-05	0.00234982	2.47749	4.65059	4.5806	5.66289	5.55284
16764791	NM_182507	KRT80	keratin 80	1.01716	9.09022	9.9239	6.08677e-05	0.0023588	2.46923	9.6169	9.5807	8.50729	8.65599
16914812	NM_001285878	CEBPB	CCAAT/enhancer binding protein (C/EBP), beta	1.04318	7.11101	9.90335	6.15905e-05	0.00236083	2.45664	7.61245	7.65274	6.67439	6.50445
16659102	NM_001256959	CLCN6	chloride channel, voltage-sensitive 6	0.956497	8.40988	9.89681	6.18223e-05	0.00236083	2.45263	8.90675	8.86951	7.97656	7.88671
16966026	NM_138389	FAM114A1	family with sequence similarity 114, member A1	0.959419	7.13473	9.88818	6.21301e-05	0.00236083	2.44733	7.65964	7.56924	6.67831	6.63173
17000168	NM_004887	CXCL14	chemokine (C-X-C motif) ligand 14	-1.14511	6.69656	-9.88464	6.22567e-05	0.00236083	2.44515	6.08476	6.16325	7.38336	7.15487
16849379	NM_003258	TK1	thymidine kinase 1, soluble	-1.11436	9.74567	-9.88073	6.23972e-05	0.00236083	2.44275	9.11968	9.25729	10.2148	10.3909
17107097	NM_001163438	SMIM10	small integral membrane protein 10	-0.993204	6.67832	-9.87091	6.27511e-05	0.00236083	2.43671	6.2362	6.12725	7.13314	7.21671
16828485	NM_001077416	TMEM231	transmembrane protein 231	1.02161	6.71125	9.87023	6.27756e-05	0.00236083	2.43629	7.30136	7.14275	6.2142	6.1867
16951485	NM_001012410	SGOL1	shugoshin-like 1 (S. pombe)	-1.00702	7.36524	-9.8687	6.28313e-05	0.00236083	2.43535	6.90069	6.82278	7.93247	7.80503
16912192	NM_021067	GINS1	GINS complex subunit 1 (Psf1 homolog)	-0.938107	7.39514	-9.85659	6.32717e-05	0.00236837	2.42789	6.92423	6.92794	7.90312	7.82526
17045198	NM_001284301	ANLN	anillin, actin binding protein	-0.933227	10.9036	-9.83893	6.39203e-05	0.00237989	2.417	10.4728	10.4012	11.3776	11.3629
17016403	NM_003534	HIST1H3G	histone cluster 1, H3g	-1.45069	8.80501	-9.83513	6.40609e-05	0.00237989	2.41465	8.2272	7.93213	9.3969	9.66381
17001005	NM_001278613	PCDH1	protocadherin 1	0.942296	7.19637	9.815	6.48118e-05	0.00238466	2.4022	7.71117	7.62387	6.71576	6.73468
16992557	NM_030627	CPEB4	cytoplasmic polyadenylation element binding protein 4	1.01468	6.56328	9.80947	6.50196e-05	0.00238466	2.39878	6.99241	7.14882	6.03801	6.07388
16803562	NM_000745	CHRNA5	cholinergic receptor, nicotinic, alpha 5 (neuronal)	-0.960102	8.22959	-9.80856	6.50541e-05	0.00238466	2.39821	7.80397	7.69512	8.7208	8.69849
16821239	NM_001100624	CENPN	centromere protein N	-0.936029	7.91106	-9.8059	6.51545e-05	0.00238466	2.39656	7.40939	7.47671	8.35571	8.40245
16818610	NM_001142466	GPT2	glutamic pyruvate transaminase (alanine aminotransferase) 2	1.27777	7.05317	9.77787	6.62233e-05	0.00241012	2.37918	7.76779	7.61632	6.27352	6.55506
16873659	NM_015168	ZC3H4	zinc finger CCCH-type containing 4	-0.945209	7.70197	-9.77489	6.63382e-05	0.00241012	2.37732	7.18258	7.27616	8.18891	8.16024
16746057	NM_001142685	ARHGAP32	Rho GTPase activating protein 32	0.956332	10.0187	9.76047	6.68973e-05	0.00242153	2.36835	10.4995	10.4943	9.48455	9.59655
16881660	NM_006636	MTHFD2	methylenetetrahydrofolate dehydrogenase (NADP+ dependent) 2, methenyltetrahydrofolate cyclohydrolase	0.902398	8.60027	9.75309	6.71852e-05	0.00242308	2.36376	9.05663	9.0463	8.14805	8.15008
17109358	OTTHUMT00000055898	RP11-431J24.2	novel trancript antisense to MAGEB17	1.00918	7.2308	9.73492	6.79009e-05	0.00243155	2.35243	7.76958	7.70119	6.65266	6.79976
16683358	NM_004091	E2F2	E2F transcription factor 2	-1.09301	6.19551	-9.72651	6.82353e-05	0.00243155	2.34717	5.63997	5.65804	6.63186	6.85218
16693976	NM_001044391	MUC1	mucin 1, cell surface associated	0.917368	7.35795	9.7196	6.85113e-05	0.00243155	2.34285	7.84905	7.78421	6.90351	6.89502
16764398	NM_175736	FMNL3	formin-like 3	1.04258	8.63187	9.71638	6.86405e-05	0.00243155	2.34084	9.08558	9.22074	8.04492	8.17623
16714504	NM_001005413	ZWINT	ZW10 interacting kinetochore protein	-1.07227	6.84628	-9.71066	6.88703e-05	0.00243155	2.33726	6.32695	6.29333	7.27931	7.48553
16937909	NM_024334	TMEM43	transmembrane protein 43	0.909579	10.0749	9.70015	6.92952e-05	0.00243155	2.33068	10.5565	10.5028	9.62136	9.61884
17049330	NM_001194990	MEPCE	methylphosphate capping enzyme	-0.94074	9.83229	-9.69587	6.94694e-05	0.00243155	2.32799	9.31769	9.40616	10.2776	10.3277
16728227	NM_001293291	MYEOV	myeloma overexpressed	1.09248	7.1468	9.69165	6.96412e-05	0.00243155	2.32535	7.71327	7.67281	6.49082	6.71031
16904827	NM_004525	LRP2	low density lipoprotein receptor-related protein 2	-1.11195	6.29731	-9.6869	6.98353e-05	0.00243155	2.32237	5.81793	5.66473	6.94269	6.76387
17052767	NM_001282876	TMEM139	transmembrane protein 139	-0.943001	8.18248	-9.6858	6.98806e-05	0.00243155	2.32168	7.70877	7.71318	8.70665	8.60131
16691046	NM_006608	PHTF1	putative homeodomain transcription factor 1	-0.955962	6.87739	-9.67164	7.04631e-05	0.00243502	2.31279	6.34717	6.45165	7.38573	7.32501
16798919	NM_001286480	ARHGAP11A	Rho GTPase activating protein 11A	-0.894864	9.16327	-9.6714	7.0473e-05	0.00243502	2.31264	8.71046	8.72121	9.61115	9.61024
17111998	NM_017669	ERCC6L	excision repair cross-complementation group 6-like	-1.0169	5.58506	-9.65578	7.1123e-05	0.00244002	2.30281	5.05233	5.10088	6.00971	6.1773
16821377	NM_001220488	CDH13	cadherin 13	0.899963	8.51671	9.65317	7.12322e-05	0.00244002	2.30117	8.98279	8.9506	8.07944	8.05402
16834689	NM_153006	NAGS	N-acetylglutamate synthase	0.947221	7.96991	9.65015	7.13587e-05	0.00244002	2.29927	8.48948	8.39755	7.46263	7.52996
16919044	NM_002895	RBL1	retinoblastoma-like 1	-1.00773	8.2864	-9.63287	7.20885e-05	0.00245326	2.28838	7.69851	7.86657	8.8007	8.77983
17013728	ENST00000367321	MTHFD1L	methylenetetrahydrofolate dehydrogenase (NADP+ dependent) 1-like	0.99421	8.47138	9.62925	7.22423e-05	0.00245326	2.28609	8.92834	9.00862	8.0429	7.90565
16913681	NM_030919	FAM83D	family with sequence similarity 83, member D	-0.899632	8.91848	-9.60169	7.34266e-05	0.00248494	2.26867	8.45517	8.48217	9.39064	9.34596
17119802	NM_001288747	DKC1	dyskeratosis congenita 1, dyskerin	1.34884	6.45642	9.59293	7.38081e-05	0.00248932	2.26312	7.01371	7.24798	5.64093	5.92309
17067332	NM_001017420	ESCO2	establishment of sister chromatid cohesion N-acetyltransferase 2	-0.933488	6.88753	-9.57625	7.45401e-05	0.00250059	2.25255	6.38374	6.45782	7.31583	7.39271
16726790	NM_002689	POLA2	polymerase (DNA directed), alpha 2, accessory subunit	-0.898277	8.16627	-9.57294	7.46865e-05	0.00250059	2.25044	7.74408	7.69019	8.6096	8.62122
16665512	ENST00000263440	ALG6	ALG6, alpha-1,3-glucosyltransferase	-0.920225	6.31611	-9.5681	7.49012e-05	0.00250059	2.24737	5.83594	5.87605	6.81734	6.7351
17094761	NM_001206	KLF9	Kruppel-like factor 9	1.06452	7.08218	9.55073	7.56771e-05	0.00251725	2.23632	7.71255	7.51633	6.50543	6.5944
16910222	NM_001244008	KIF1A	kinesin family member 1A	1.01872	8.0758	9.54555	7.59099e-05	0.00251725	2.23303	8.644	8.52633	7.63747	7.49542
16979256	NM_014822	SEC24D	SEC24 family member D	0.951758	7.67991	9.4917	7.83838e-05	0.00258503	2.19863	8.15507	8.1565	7.13691	7.27114
17007673	NM_017754	UHRF1BP1	UHRF1 binding protein 1	1.03755	8.43405	9.48971	7.84769e-05	0.00258503	2.19735	8.99196	8.91369	8.00836	7.82218
16931384	NM_016426	GTSE1	G-2 and S-phase expressed 1	-0.936509	8.23342	-9.47531	7.91551e-05	0.00259871	2.18812	7.82302	7.7073	8.68434	8.719
17052823	NM_001010972	ZYX	zyxin	0.953902	9.16901	9.45523	8.01118e-05	0.00262141	2.17523	9.71274	9.57919	8.71245	8.67167
17010552	ENST00000230510	TTK	TTK protein kinase	-0.933796	8.81367	-9.44273	8.07144e-05	0.00262239	2.16718	8.40267	8.29088	9.30414	9.257
16735764	NM_001098579	MRVI1	murine retrovirus integration site 1 homolog	-0.881516	5.80705	-9.44089	8.08035e-05	0.00262239	2.166	5.35312	5.37946	6.22973	6.26588
16690067	NM_194292	SASS6	spindle assembly 6 homolog (C. elegans)	-0.911854	7.63032	-9.43812	8.09379e-05	0.00262239	2.16421	7.12998	7.2188	8.0669	8.10558
16745236	NM_002105	H2AFX	H2A histone family, member X	-1.082	9.23138	-9.43069	8.12998e-05	0.00262551	2.15942	8.57771	8.80304	9.73877	9.80598
16913014	NM_020884	MYH7B	myosin, heavy chain 7B, cardiac muscle, beta	-0.946872	6.62874	-9.42357	8.1648e-05	0.00262816	2.15483	6.0911	6.21951	7.07967	7.12469
16740630	NM_005438	FOSL1	FOS-like antigen 1	0.961854	10.6727	9.40635	8.24981e-05	0.00263718	2.14371	11.1292	11.1781	10.1203	10.2633
17009054	NM_001291969	POLH	polymerase (DNA directed), eta	-0.920255	6.21517	-9.40611	8.25096e-05	0.00263718	2.14356	5.69975	5.81033	6.67438	6.6762
16952925	ENST00000431015	ALS2CL	ALS2 C-terminal like	0.922792	6.13574	9.39621	8.30033e-05	0.00263718	2.13715	6.58589	6.60838	5.61821	5.73048
16736891	NM_031217	KIF18A	kinesin family member 18A	-0.958511	7.64883	-9.39441	8.3093e-05	0.00263718	2.13599	7.10237	7.23677	8.0956	8.16056
17110367	NR_029636	MIR222	microRNA 222	1.15803	5.32979	9.38701	8.34644e-05	0.00263718	2.1312	5.93079	5.88681	4.61113	4.89041
17098949	NM_001287390	CCBL1	cysteine conjugate-beta lyase, cytoplasmic	0.962676	7.48547	9.38573	8.35292e-05	0.00263718	2.13037	8.02411	7.9095	6.95298	7.05528
16684760	NM_003680	YARS	tyrosyl-tRNA synthetase	0.868033	8.42492	9.37099	8.42752e-05	0.00265094	2.12081	8.85063	8.86723	7.98673	7.99507
17068782	NM_005914	MCM4	minichromosome maintenance complex component 4	-1.01701	9.60789	-9.36655	8.45017e-05	0.00265094	2.11793	9.02123	9.17753	10.1764	10.0564
16925911	ENST00000352483	RIPK4	receptor-interacting serine-threonine kinase 4	1.37719	7.2176	9.3456	8.55789e-05	0.00267307	2.10432	7.9005	7.9119	6.33046	6.72756
17016486	NM_003519	HIST1H2BL	histone cluster 1, H2bl	-1.5616	6.59037	-9.34233	8.57483e-05	0.00267307	2.10219	5.89163	5.72752	7.59783	7.14451
17100350	NM_001013653	LRRC26	leucine rich repeat containing 26	-0.94181	6.6963	-9.33152	8.63119e-05	0.00267571	2.09515	6.19756	6.25324	7.23143	7.10298
16818820	NM_022162	NOD2	nucleotide-binding oligomerization domain containing 2	0.922738	6.0462	9.33033	8.63743e-05	0.00267571	2.09437	6.49574	6.5194	5.5253	5.64436
16804631	NM_152259	TICRR	TOPBP1-interacting checkpoint and replication regulator	-0.94264	8.03107	-9.31973	8.69312e-05	0.00268454	2.08746	7.60792	7.51157	8.45032	8.55445
16721965	NM_014633	CTR9	CTR9, Paf1/RNA polymerase II complex component	-1.06095	9.56396	-9.30554	8.76834e-05	0.00269325	2.0782	8.92114	9.14584	10.0678	10.121
17021004	NM_017934	PHIP	pleckstrin homology domain interacting protein	-0.890491	8.95964	-9.29965	8.79976e-05	0.00269325	2.07435	8.52124	8.50755	9.44736	9.36241
17026318	NM_005345	HSPA1A	heat shock 70kDa protein 1A	-0.914897	10.4743	-9.29655	8.81637e-05	0.00269325	2.07232	10.067	9.96663	10.9021	10.9614
16730215	NM_152431	PIWIL4	piwi-like RNA-mediated gene silencing 4	0.932252	6.34851	9.28979	8.85269e-05	0.00269325	2.0679	6.7554	6.87387	5.9147	5.85007
17019565	NM_004556	NFKBIE	nuclear factor of kappa light polypeptide gene enhancer in B-cells inhibitor, epsilon	0.87053	6.51512	9.28529	8.877e-05	0.00269325	2.06495	6.95987	6.9409	6.10484	6.05487
16802653	NM_024817	THSD4	thrombospondin, type I, domain containing 4	1.15618	6.22888	9.28384	8.88482e-05	0.00269325	2.064	6.83225	6.78168	5.50861	5.79296
16979515	NM_001237	CCNA2	cyclin A2	-0.858128	9.43774	-9.27597	8.92752e-05	0.00269475	2.05884	9.01153	9.00582	9.87029	9.86332
16749875	ENST00000541178	ALG10	ALG10, alpha-1,2-glucosyltransferase	-1.05065	6.27164	-9.26906	8.96521e-05	0.00269475	2.05431	5.805	5.68763	6.8941	6.69984
16757687	NM_001130112	RFC5	replication factor C (activator 1) 5, 36.5kDa	-0.866275	8.75273	-9.24379	9.10455e-05	0.00269475	2.03772	8.31413	8.32505	9.16014	9.2116
16670377	NM_001034077	HIST2H4B	histone cluster 2, H4b	-1.25861	8.61723	-9.24085	9.12092e-05	0.00269475	2.03578	7.82034	8.15551	9.20315	9.28992
16697893	NM_005558	LAD1	ladinin 1	0.995168	7.98972	9.23427	9.15772e-05	0.00269475	2.03145	8.58244	8.39217	7.48081	7.50346
16796412	NR_026779	LINC00341	long intergenic non-protein coding RNA 341	0.858246	8.60909	9.22881	9.18835e-05	0.00269475	2.02785	9.02553	9.0509	8.1686	8.19134
16844735	NM_002274	KRT13	keratin 13	1.13151	10.4554	9.22872	9.18889e-05	0.00269475	2.02779	10.9952	11.0471	9.75267	10.0265
17028007	NM_005346	HSPA1B	heat shock 70kDa protein 1B	-0.895127	10.26	-9.2247	9.2115e-05	0.00269475	2.02515	9.83787	9.78693	10.6635	10.7516
17028041	NM_001040437	C6orf48	chromosome 6 open reading frame 48	0.863301	10.5478	9.22442	9.2131e-05	0.00269475	2.02496	10.9734	10.9854	10.1403	10.0919
16933760	NM_001257135	LIF	leukemia inhibitory factor	0.889349	8.46495	9.22321	9.21992e-05	0.00269475	2.02416	8.94906	8.87018	7.99418	8.04637
16666738	NM_001554	CYR61	cysteine-rich, angiogenic inducer, 61	0.878428	8.13888	9.22168	9.22856e-05	0.00269475	2.02315	8.58795	8.56824	7.66135	7.73799
16790744	NM_012244	SLC7A8	solute carrier family 7 (amino acid transporter light chain, L system), member 8	-0.880284	8.70857	-9.21781	9.25047e-05	0.00269475	2.0206	8.23219	8.30465	9.12893	9.16848
17048613	NM_016116	ASB4	ankyrin repeat and SOCS box containing 4	-0.884564	7.45086	-9.21736	9.25304e-05	0.00269475	2.0203	7.05253	6.96463	7.89956	7.88673
16775883	NM_144778	MBNL2	muscleblind-like splicing regulator 2	0.891749	9.49531	9.21409	9.27156e-05	0.00269475	2.01815	9.95883	9.92353	9.0956	9.00327
16697062	NM_015039	NMNAT2	nicotinamide nucleotide adenylyltransferase 2	0.950715	7.05994	9.2001	9.35149e-05	0.00271001	2.00891	7.46698	7.60361	6.54325	6.62591
16969578	NM_183075	CYP2U1	cytochrome P450, family 2, subfamily U, polypeptide 1	-0.918143	6.09615	-9.18513	9.43787e-05	0.00272705	1.99901	5.70182	5.57232	6.56638	6.54405
16824690	NM_080663	ERI2	ERI1 exoribonuclease family member 2	-0.858636	6.47858	-9.15995	9.58527e-05	0.00276156	1.98231	6.07333	6.0252	6.91913	6.89667
16863877	NM_014330	PPP1R15A	protein phosphatase 1, regulatory subunit 15A	0.992197	8.24428	9.13563	9.73014e-05	0.00278849	1.96615	8.64927	8.83149	7.78588	7.71048
16769952	NM_001177428	TRPV4	transient receptor potential cation channel, subfamily V, member 4	0.922747	7.78854	9.13479	9.73516e-05	0.00278849	1.96559	8.18709	8.31273	7.29545	7.35888
17121740	NM_000422	KRT17	keratin 17	0.846927	7.51406	9.12271	9.80811e-05	0.00280039	1.95755	7.92595	7.9491	7.08238	7.09881
16945101	NM_004526	MCM2	minichromosome maintenance complex component 2	-0.854864	9.35	-9.11855	9.83338e-05	0.00280039	1.95477	8.94888	8.89626	9.77299	9.78188
17005589	NM_021052	HIST1H2AE	histone cluster 1, H2ae	-0.848883	7.92832	-9.10561	9.91249e-05	0.00281206	1.94614	7.50115	7.5066	8.37303	8.33248
17121756	OTTHUMT00000431352	RP11-218F4.1	novel transcript	-1.4499	5.53352	-9.10028	9.94525e-05	0.00281206	1.94258	4.90936	4.70777	6.4592	6.05775
17002861	NR_026682	LOC100268168	uncharacterized LOC100268168	0.856385	5.46148	9.09612	9.97096e-05	0.00281206	1.93979	5.90868	5.87066	5.00931	5.05726
16973975	NM_001014809	CRMP1	collapsin response mediator protein 1	0.96855	6.45183	9.09093	0.000100031	0.00281206	1.93633	6.93832	6.93389	6.05912	5.87599
16804902	NM_000057	BLM	Bloom syndrome, RecQ helicase-like	-1.03694	7.82663	-9.08521	0.000100387	0.00281206	1.9325	7.19509	7.42124	8.37014	8.32007
16936137	NM_022766	CERK	ceramide kinase	-0.859992	7.94819	-9.08418	0.000100451	0.00281206	1.93181	7.51017	7.52622	8.34403	8.41234
17120076	NM_001194986	TRABD2B	TraB domain containing 2B	0.977909	6.18874	9.06859	0.000101428	0.00282617	1.92137	6.71689	6.63851	5.78746	5.61212
17067410	NM_017412	FZD3	frizzled class receptor 3	-0.960022	7.70789	-9.05485	0.000102299	0.00282617	1.91215	7.14195	7.31381	8.21392	8.1619
16998059	NM_020801	ARRDC3	arrestin domain containing 3	0.910971	8.12929	9.05424	0.000102338	0.00282617	1.91174	8.51848	8.65106	7.69156	7.65604
16913957	NM_001278610	MYBL2	v-myb avian myeloblastosis viral oncogene homolog-like 2	-0.969159	9.15665	-9.05172	0.000102499	0.00282617	1.91004	8.62083	8.7233	9.56311	9.71935
16737260	NM_145804	ABTB2	ankyrin repeat and BTB (POZ) domain containing 2	0.888677	8.31374	9.04847	0.000102706	0.00282617	1.90787	8.70085	8.81532	7.86752	7.87129
16697930	NM_012396	PHLDA3	pleckstrin homology-like domain, family A, member 3	1.3599	7.24109	9.04277	0.000103071	0.00282617	1.90403	7.71668	8.1254	6.54144	6.58083
16880712	NM_003038	SLC1A4	solute carrier family 1 (glutamate/neutral amino acid transporter), member 4	0.867468	8.32964	9.04121	0.000103171	0.00282617	1.90298	8.72403	8.80272	7.8756	7.91622
17109612	NM_001024666	SH3KBP1	SH3-domain kinase binding protein 1	0.840804	8.43915	9.0401	0.000103243	0.00282617	1.90223	8.86987	8.84924	8.00495	8.03255
16673154	NM_031423	NUF2	NUF2, NDC80 kinetochore complex component	-0.930587	6.41275	-9.03559	0.000103533	0.00282629	1.89921	5.91218	5.98274	6.80793	6.94816
16934568	NM_001102371	FOXRED2	FAD-dependent oxidoreductase domain containing 2	-0.978636	9.06621	-9.02017	0.000104535	0.00284141	1.88882	8.67207	8.48171	9.53125	9.5798
17096205	NM_153695	ZNF367	zinc finger protein 367	-1.05115	7.76829	-9.01485	0.000104883	0.00284141	1.88523	7.1511	7.33433	8.37587	8.21185
16736807	ENST00000529615	CCDC34	coiled-coil domain containing 34	-1.16433	5.62755	-9.0039	0.000105603	0.00284141	1.87784	5.10591	4.98486	6.06541	6.35402
16894710	NM_030797	FAM49A	family with sequence similarity 49, member A	0.952415	5.4051	8.999	0.000105928	0.00284141	1.87453	5.91428	5.84834	5.01168	4.8461
16849274	NM_006456	ST6GALNAC2	ST6 (alpha-N-acetyl-neuraminyl-2,3-beta-galactosyl-1,3)-N-acetylgalactosaminide alpha-2,6-sialyltransferase 2	0.851381	6.54572	8.99871	0.000105947	0.00284141	1.87434	6.94046	7.00236	6.10452	6.13553
16995715	NR_037665	LOC100506548	uncharacterized LOC100506548	0.983428	7.69081	8.99784	0.000106004	0.00284141	1.87375	8.18031	8.18474	7.09826	7.29993
16757636	XM_005253968	RNFT2	ring finger protein, transmembrane 2	-0.886958	7.05709	-8.99238	0.000106367	0.00284141	1.87006	6.56389	6.66332	7.46806	7.53307
17013773	NM_005100	AKAP12	A kinase (PRKA) anchor protein 12	0.846011	7.79515	8.98737	0.000106702	0.00284141	1.86667	8.18903	8.24728	7.38107	7.36321
16809748	NM_018365	MNS1	meiosis-specific nuclear structural 1	-1.17736	5.26455	-8.98387	0.000106936	0.00284141	1.8643	4.53242	4.81932	5.92579	5.78067
16680362	NM_001242659	C1orf233	chromosome 1 open reading frame 233	-0.876644	6.83617	-8.98347	0.000106963	0.00284141	1.86404	6.36266	6.43305	7.23361	7.31539
16889563	NM_003507	FZD7	frizzled class receptor 7	-0.91237	7.31951	-8.96033	0.000108527	0.00287525	1.84836	6.85856	6.86809	7.84933	7.70207
17047258	NM_001145064	GATSL2	GATS protein-like 2	-0.846545	8.94498	-8.954	0.00010896	0.00287635	1.84406	8.52691	8.51651	9.40191	9.3346
16801835	NM_001288585	LACTB	lactamase, beta	0.847838	5.85693	8.95122	0.000109151	0.00287635	1.84217	6.26721	6.29449	5.40026	5.46576
17094064	NM_003028	SHB	Src homology 2 domain containing adaptor protein B	0.848485	7.46818	8.94594	0.000109513	0.00287717	1.83859	7.85594	7.9289	7.04335	7.04452
17109211	NM_001018113	FANCB	Fanconi anemia, complementation group B	-0.849724	6.76643	-8.94231	0.000109764	0.00287717	1.83612	6.34127	6.34186	7.15345	7.22913
16757347	AB044545	OAS3	2-5-oligoadenylate synthetase 3, 100kDa	-0.948812	6.56591	-8.93689	0.000110139	0.00287935	1.83243	6.17876	6.00424	7.01712	7.0635
16956983	NM_170662	CBLB	Cbl proto-oncogene B, E3 ubiquitin protein ligase	1.0751	5.68192	8.91312	0.000111802	0.00291511	1.81625	6.24817	6.19077	5.01341	5.27533
16696490	NM_001127181	CENPL	centromere protein L	-0.824277	6.95697	-8.89605	0.000113014	0.00293897	1.80459	6.55388	6.53578	7.37349	7.36472
16852296	NM_006033	LIPG	lipase, endothelial	1.04314	6.88891	8.88735	0.000113638	0.00294742	1.79864	7.31276	7.50819	6.44551	6.28916
16778887	NM_001286761	KIAA0226L	KIAA0226-like	0.966456	6.61277	8.87056	0.000114852	0.00297113	1.78715	7.07547	7.11652	6.22714	6.03194
16991948	ENST00000519204	TENM2	teneurin transmembrane protein 2	-1.00436	5.70221	-8.85496	0.000115995	0.00299284	1.77645	5.14377	5.2563	6.10559	6.30319
16762597	NM_016551	TM7SF3	transmembrane 7 superfamily member 3	-0.862529	8.95282	-8.84933	0.00011641	0.00299575	1.77259	8.46826	8.57486	9.38563	9.38255
17093920	NM_001128227	GNE	glucosamine (UDP-N-acetyl)-2-epimerase/N-acetylmannosamine kinase	0.885164	6.75681	8.84466	0.000116756	0.00299683	1.76938	7.15799	7.24079	6.26251	6.36594
17101737	ENST00000498004	CA5B	carbonic anhydrase VB, mitochondrial	1.09304	6.43534	8.8347	0.000117498	0.00299697	1.76253	6.90823	7.05549	5.76706	6.01058
16931763	OTTHUMT00000341493	CTA-384D8.31	novel transcript	1.09324	6.54556	8.82779	0.000118015	0.00299697	1.75778	6.98913	7.19523	6.09751	5.90037
16664569	NM_078626	CDKN2C	cyclin-dependent kinase inhibitor 2C (p18, inhibits CDK4)	-1.91493	4.63273	-8.82572	0.000118171	0.00299697	1.75635	3.43085	3.91968	5.35413	5.82625
16867511	NM_001276479	LONP1	lon peptidase 1, mitochondrial	0.864972	8.37814	8.82531	0.000118201	0.00299697	1.75607	8.8459	8.77536	7.90188	7.98944
16765558	NM_002205	ITGA5	integrin, alpha 5 (fibronectin receptor, alpha polypeptide)	0.906888	7.96584	8.81677	0.000118846	0.00299697	1.75019	8.48753	8.35104	7.47469	7.5501
16890602	NR_037701	PKI55	DKFZp434H1419	-0.976571	7.22097	-8.81661	0.000118858	0.00299697	1.75008	6.62805	6.83732	7.69539	7.72312
16864373	NM_001168222	TBC1D17	TBC1 domain family, member 17	0.960806	8.88997	8.81524	0.000118962	0.00299697	1.74913	9.27098	9.46977	8.41933	8.39981
16965162	NM_001177381	CPEB2	cytoplasmic polyadenylation element binding protein 2	1.18992	5.50091	8.81227	0.000119187	0.00299697	1.74709	6.11144	6.08031	5.07558	4.73633
16714998	NM_001080449	DNA2	DNA replication helicase/nuclease 2	-1.10978	6.98088	-8.8046	0.000119772	0.00300399	1.74179	6.5742	6.27779	7.54049	7.53106
16677278	NM_001030287	ATF3	activating transcription factor 3	0.952305	5.69426	8.80065	0.000120075	0.00300399	1.73907	6.2625	6.07833	5.18673	5.24949
17014714	NM_001207008	MLLT4	myeloid/lymphoid or mixed-lineage leukemia (trithorax homolog, Drosophila); translocated to, 4	0.831381	9.18487	8.78625	0.000121184	0.00302047	1.72912	9.63148	9.56964	8.78495	8.75341
17117636	AK095276	LOC283588	uncharacterized LOC283588	1.36031	5.34592	8.78417	0.000121345	0.00302047	1.72768	5.84564	6.20651	4.54877	4.78276
16662648	NM_001256875	CDCA8	cell division cycle associated 8	-0.989217	8.46966	-8.76162	0.000123109	0.0030432	1.71206	7.95707	7.99303	8.85358	9.07496
16956897	NM_001077203	SENP7	SUMO1/sentrin specific peptidase 7	-0.922615	5.25786	-8.75784	0.000123407	0.0030432	1.70944	4.72551	4.8676	5.77001	5.66833
16816660	NM_020422	TMEM159	transmembrane protein 159	1.40587	6.13598	8.75339	0.00012376	0.0030432	1.70635	6.84071	6.83713	5.20572	5.66037
16937024	ENST00000256495	BHLHE40	basic helix-loop-helix family, member e40	0.853429	9.33711	8.74573	0.00012437	0.0030432	1.70103	9.73746	9.79019	8.95745	8.86334
16907488	NM_203365	RAPH1	Ras association (RalGDS/AF-6) and pleckstrin homology domains 1	0.855392	8.53198	8.74261	0.000124619	0.0030432	1.69887	8.92101	8.99833	8.0647	8.14386
16930811	NM_019106	SEPT3	septin 3	-0.881243	7.08737	-8.73692	0.000125075	0.0030432	1.69491	6.62381	6.66969	7.59384	7.46215
16660863	NM_013943	CLIC4	chloride intracellular channel 4	0.848406	9.98347	8.73536	0.000125201	0.0030432	1.69382	10.3746	10.4408	9.59859	9.51995
16686376	NM_020883	ZSWIM5	zinc finger, SWIM-type containing 5	-0.964697	6.15602	-8.73392	0.000125317	0.0030432	1.69282	5.60983	5.73751	6.55554	6.72119
16901755	NM_001278616	BUB1	BUB1 mitotic checkpoint serine/threonine kinase	-0.817498	9.32421	-8.73377	0.000125328	0.0030432	1.69272	8.93418	8.89674	9.74965	9.71627
16728245	XR_252919	LOC101928262	uncharacterized LOC101928262	1.56159	5.96828	8.73366	0.000125337	0.0030432	1.69264	6.78215	6.716	4.92464	5.45034
17070013	NM_172037	RDH10	retinol dehydrogenase 10 (all-trans)	0.848158	6.94789	8.70745	0.000127469	0.00308737	1.67438	7.32781	7.41613	6.49455	6.55307
16673557	ENST00000286031	C1orf112	chromosome 1 open reading frame 112	-0.865964	6.53113	-8.69895	0.000128169	0.00309215	1.66845	6.03509	6.1612	6.95438	6.97384
16839294	NM_001159746	ABR	active BCR-related	0.823218	9.67374	8.69746	0.000128292	0.00309215	1.66741	10.1013	10.0694	9.23105	9.29321
17013657	NM_025218	ULBP1	UL16 binding protein 1	1.84028	6.59676	8.68719	0.000129145	0.00310062	1.66023	7.52569	7.50812	6.00645	5.34679
16836311	NM_005450	NOG	noggin	1.043	6.78613	8.68312	0.000129485	0.00310062	1.65738	7.43191	7.18335	6.31119	6.21806
17052776	NM_001224	CASP2	caspase 2, apoptosis-related cysteine peptidase	-0.822692	9.27908	-8.68192	0.000129585	0.00310062	1.65655	8.90354	8.83194	9.68975	9.6911
17014091	NM_016224	SNX9	sorting nexin 9	0.875681	9.64989	8.67496	0.000130169	0.00310707	1.65167	10.1003	10.0752	9.28098	9.14311
17033131	NM_001202521	DDR1	discoidin domain receptor tyrosine kinase 1	0.825878	9.77357	8.65435	0.000131916	0.00313295	1.63722	10.173	10.2	9.39913	9.32212
17057478	NM_000598	IGFBP3	insulin-like growth factor binding protein 3	0.845867	8.03883	8.65278	0.000132051	0.00313295	1.63612	8.40838	8.51516	7.6286	7.6032
16863419	NM_198541	IGFL1	IGF-like family member 1	2.21041	6.22632	8.64588	0.000132642	0.00313295	1.63128	7.23294	7.43012	4.72044	5.5218
16921268	NM_001256358	PTK6	protein tyrosine kinase 6	0.970421	8.42691	8.64579	0.00013265	0.00313295	1.63121	8.99644	8.8278	7.87085	8.01254
16841660	OTTHUMT00000363271	RP11-385D13.1	novel tripartite motif-containing 16 (TRIM16) and CMT1A duplicated region transcript 1 (CDRT1) protein	0.827111	7.22564	8.6436	0.000132838	0.00313295	1.62968	7.60446	7.67392	6.83673	6.78743
17095703	NM_005384	NFIL3	nuclear factor, interleukin 3 regulated	0.881008	6.42214	8.60631	0.000136095	0.00319787	1.60342	6.93864	6.78664	5.98061	5.98265
16848435	ENST00000453722	LINC00511	long intergenic non-protein coding RNA 511	1.00722	8.63084	8.6047	0.000136238	0.00319787	1.60228	9.23405	9.03484	8.05298	8.20149
17054980	NM_004227	CYTH3	cytohesin 3	0.868566	7.74551	8.57958	0.000138486	0.00324278	1.58453	8.22989	8.12969	7.26046	7.36199
16688386	NM_001114120	DEPDC1	DEP domain containing 1	-0.835736	7.63254	-8.57603	0.000138807	0.00324278	1.58202	7.25679	7.17255	8.08294	8.01787
16993878	NM_006598	SLC12A7	solute carrier family 12 (potassium/chloride transporter), member 7	0.817901	7.59194	8.57087	0.000139276	0.00324606	1.57836	8.03141	7.97037	7.15594	7.21004
17028781	NM_002714	PPP1R10	protein phosphatase 1, regulatory subunit 10	-0.822547	8.91754	-8.55817	0.000140436	0.0032654	1.56936	8.54273	8.46981	9.30186	9.35578
16962208	NM_033259	CAMK2N2	calcium/calmodulin-dependent protein kinase II inhibitor 2	-0.840528	6.04252	-8.54979	0.000141209	0.00327566	1.56341	5.57195	5.67257	6.49117	6.4344
16824706	NM_173475	DCUN1D3	DCN1, defective in cullin neddylation 1, domain containing 3	0.935517	9.68604	8.54372	0.000141771	0.00327902	1.55911	10.2481	10.0595	9.18076	9.2558
17024335	NM_006734	HIVEP2	human immunodeficiency virus type I enhancer binding protein 2	0.807477	8.25874	8.54107	0.000142018	0.00327902	1.55722	8.63371	8.69125	7.83683	7.87318
16916012	NR_037882	RTEL1-TNFRSF6B	RTEL1-TNFRSF6B readthrough (NMD candidate)	0.937272	8.1222	8.53736	0.000142364	0.00327934	1.55458	8.52196	8.65972	7.57774	7.72939
16897886	NM_001114636	FANCL	Fanconi anemia, complementation group L	-0.916083	6.41422	-8.52667	0.000143364	0.00329472	1.54698	6.02775	5.88462	6.81027	6.93426
16706610	NR_038464	LINC00857	long intergenic non-protein coding RNA 857	-0.995053	6.35098	-8.51417	0.000144545	0.00330786	1.53807	5.96777	5.73914	6.89582	6.8012
16668150	NR_034072	SARS	seryl-tRNA synthetase	0.8332	8.64508	8.51354	0.000144606	0.00330786	1.53762	9.09212	9.03124	8.27485	8.18211
16787831	NM_020958	PPP4R4	protein phosphatase 4, regulatory subunit 4	1.1873	6.45391	8.5099	0.000144951	0.00330811	1.53503	6.89214	7.20297	5.76776	5.95275
16957951	NM_199420	POLQ	polymerase (DNA directed), theta	-0.871983	7.86209	-8.50479	0.000145439	0.00331159	1.53138	7.45321	7.399	8.22638	8.36979
16942103	NM_001164317	FLNB	filamin B, beta	0.811311	10.2711	8.49947	0.000145949	0.00331557	1.52758	10.7163	10.6372	9.85485	9.876
17084904	NM_001256685	MELK	maternal embryonic leucine zipper kinase	-0.816415	8.74348	-8.49208	0.000146661	0.00331975	1.5223	8.37535	8.29519	9.17325	9.13012
16865116	NM_001020818	MYADM	myeloid-associated differentiation marker	0.915121	8.78918	8.48659	0.000147192	0.00331975	1.51838	9.19486	9.29863	8.41241	8.25083
16847238	NM_001100595	SKA2	spindle and kinetochore associated complex subunit 2	-1.23218	6.87557	-8.48107	0.000147729	0.00331975	1.51443	6.26399	6.25496	7.6856	7.29772
17005532	NM_003529	HIST1H3A	histone cluster 1, H3a	-1.90768	6.19725	-8.48075	0.00014776	0.00331975	1.5142	4.88973	5.59709	7.12059	7.18159
16758336	NM_014708	KNTC1	kinetochore associated 1	-0.824268	8.3709	-8.47705	0.00014812	0.00331975	1.51155	7.91115	8.00637	8.80401	8.76205
17108096	NM_000033	ABCD1	ATP-binding cassette, sub-family D (ALD), member 1	-0.791315	7.08296	-8.47675	0.000148149	0.00331975	1.51134	6.6747	6.69991	7.46047	7.49677
16873087	NM_002250	KCNN4	potassium intermediate/small conductance calcium-activated channel, subfamily N, member 4	0.849583	8.16395	8.4651	0.000149293	0.00333781	1.50299	8.62919	8.54829	7.68509	7.79322
16717235	NM_021732	AVPI1	arginine vasopressin-induced 1	0.818924	7.7889	8.45698	0.000150095	0.00334213	1.49717	8.1693	8.22742	7.33907	7.4198
17102129	NM_002970	SAT1	spermidine/spermine N1-acetyltransferase 1	0.844747	7.94333	8.45631	0.000150162	0.00334213	1.49668	8.30075	8.43065	7.52874	7.51317
16850025	NM_006907	PYCR1	pyrroline-5-carboxylate reductase 1	0.836479	7.95573	8.44094	0.000151696	0.00335938	1.48565	8.42174	8.32621	7.49849	7.5765
16838359	NM_001012270	BIRC5	baculoviral IAP repeat containing 5	-0.828022	8.13989	-8.43378	0.000152417	0.00335938	1.4805	7.78004	7.67172	8.57197	8.53584
16810559	ENST00000559280	KIAA0101	KIAA0101	-0.79117	7.95331	-8.43292	0.000152504	0.00335938	1.47988	7.53584	7.57962	8.33241	8.36539
16972616	NM_018248	NEIL3	nei endonuclease VIII-like 3 (E. coli)	-1.20424	7.17756	-8.42929	0.00015287	0.00335938	1.47727	6.38761	6.76326	7.79589	7.76346
16979389	ENST00000296509	MAD2L1	MAD2 mitotic arrest deficient-like 1 (yeast)	-0.781024	7.43242	-8.42533	0.000153272	0.00335938	1.47442	7.0349	7.04893	7.81423	7.83164
16999712	ENST00000401867	P4HA2	prolyl 4-hydroxylase, alpha polypeptide II	0.910953	8.15231	8.42427	0.000153381	0.00335938	1.47365	8.6476	8.56798	7.78533	7.60835
16942167	NM_020676	ABHD6	abhydrolase domain containing 6	-0.928159	8.46216	-8.42368	0.00015344	0.00335938	1.47323	7.97372	8.02244	9.02705	8.82542
16901393	NM_001450	FHL2	four and a half LIM domains 2	0.782788	7.3549	8.42097	0.000153717	0.00335938	1.47127	7.73241	7.76017	6.95481	6.97219
16943954	NM_017945	SLC35A5	solute carrier family 35, member A5	-0.971448	7.80955	-8.41797	0.000154023	0.00335938	1.46911	7.274	7.37365	8.40391	8.18664
16815905	NM_152308	RMI2	RecQ mediated genome instability 2	-0.807352	6.44904	-8.41077	0.00015476	0.00335938	1.46392	6.06914	6.02159	6.89041	6.81503
16911675	NM_052865	MGME1	mitochondrial genome maintenance exonuclease 1	-0.781551	8.34889	-8.41065	0.000154772	0.00335938	1.46384	7.96841	7.94782	8.72767	8.75166
16919769	NM_020967	NCOA5	nuclear receptor coactivator 5	-0.937709	9.61833	-8.40801	0.000155044	0.00335938	1.46193	9.04285	9.2561	10.0705	10.1039
16706180	NM_001145031	PLAU	plasminogen activator, urokinase	0.990213	6.68528	8.40497	0.000155357	0.00335938	1.45974	7.17993	7.18084	6.0638	6.31654
16719515	NM_001145966	MKI67	marker of proliferation Ki-67	-0.854599	10.8485	-8.39672	0.000156211	0.00336579	1.45378	10.4914	10.3511	11.2536	11.2981
16904995	NR_027433	LINC01124	long intergenic non-protein coding RNA 1124	-0.828453	6.74052	-8.39369	0.000156527	0.00336579	1.45159	6.26734	6.38525	7.1643	7.14519
17075776	NM_001278945	PBK	PDZ binding kinase	-0.817706	8.41526	-8.39049	0.00015686	0.00336579	1.44928	7.95868	8.05413	8.84773	8.80049
16874005	NM_001352	DBP	D site of albumin promoter (albumin D-box) binding protein	-0.800371	7.73763	-8.389	0.000157016	0.00336579	1.4482	7.37463	7.30026	8.15421	8.12142
17016372	NM_005319	HIST1H1C	histone cluster 1, H1c	-0.860521	9.58239	-8.37395	0.000158597	0.00338895	1.43731	9.08287	9.22138	9.97767	10.0476
16986583	NM_152405	JMY	junction mediating and regulatory protein, p53 cofactor	0.884759	7.90568	8.3722	0.000158782	0.00338895	1.43604	8.43645	8.25967	7.46865	7.45796
16972155	ENST00000261507	MSMO1	methylsterol monooxygenase 1	0.777953	8.83032	8.36027	0.00016005	0.00339708	1.4274	9.22698	9.21161	8.42513	8.45756
16925239	NM_017613	DONSON	downstream neighbor of SON	-0.783757	8.56343	-8.35901	0.000160185	0.00339708	1.42648	8.15589	8.18722	8.97706	8.93356
16952797	NM_020208	SLC6A20	solute carrier family 6 (proline IMINO transporter), member 20	0.829977	6.21594	8.3576	0.000160336	0.00339708	1.42545	6.64701	6.61484	5.86153	5.74038
16904780	NM_020675	SPC25	SPC25, NDC80 kinetochore complex component	-1.27709	6.55952	-8.35571	0.000160538	0.00339708	1.42409	5.84748	5.99448	7.3955	7.00063
16702571	NM_018518	MCM10	minichromosome maintenance complex component 10	-1.2038	7.94852	-8.33289	0.000163006	0.00344194	1.4075	7.47794	7.21531	8.41016	8.6907
17012313	NM_001199619	NCOA7	nuclear receptor coactivator 7	0.887903	7.09598	8.32736	0.00016361	0.00344442	1.40347	7.52317	7.55669	6.56168	6.74237
16961379	ENST00000522596	LRRC34	leucine rich repeat containing 34	-0.780356	6.26764	-8.32536	0.00016383	0.00344442	1.40201	5.87145	5.88349	6.63202	6.68363
16695262	NM_002241	KCNJ10	potassium inwardly-rectifying channel, subfamily J, member 10	1.12731	7.07129	8.31884	0.000164547	0.00344442	1.39727	7.79078	7.47911	6.5792	6.43607
16987531	NM_001130140	ERAP2	endoplasmic reticulum aminopeptidase 2	-0.865376	5.36869	-8.31704	0.000164745	0.00344442	1.39596	4.9535	4.91851	5.72069	5.88207
16857192	NM_005483	CHAF1A	chromatin assembly factor 1, subunit A (p150)	-0.825015	8.36977	-8.31594	0.000164867	0.00344442	1.39516	7.99695	7.91757	8.73438	8.83016
16827764	NM_001605	AARS	alanyl-tRNA synthetase	0.808272	9.94468	8.30712	0.000165845	0.00345756	1.38872	10.3626	10.335	9.49002	9.59107
16787623	NM_005113	GOLGA5	golgin A5	0.78745	9.30422	8.29873	0.000166782	0.00346477	1.38259	9.6972	9.69868	8.9473	8.87368
16771894	NM_022782	MPHOSPH9	M-phase phosphoprotein 9	-0.769808	7.04822	-8.29563	0.000167129	0.00346477	1.38033	6.65034	6.67628	7.42982	7.43642
17086784	NM_001012267	CENPP	centromere protein P	-0.939865	7.29784	-8.29462	0.000167243	0.00346477	1.37959	6.72021	6.93561	7.80313	7.73242
16867784	NM_000064	C3	complement component 3	0.94296	5.91048	8.28792	0.000167997	0.00347312	1.37469	6.31143	6.45249	5.34849	5.52951
16899982	XR_251108	LOC101928173	uncharacterized LOC101928173	-1.00959	5.50206	-8.28007	0.000168887	0.00348422	1.36895	4.99279	5.00174	6.14435	5.86935
17097560	NM_030767	AKNA	AT-hook transcription factor	1.1693	6.42192	8.2748	0.000169487	0.00348931	1.36509	6.82179	7.19135	5.84574	5.82881
16921134	NM_033081	DIDO1	death inducer-obliterator 1	-1.03485	8.35042	-8.26759	0.000170312	0.003499	1.35981	7.70221	7.96378	8.93282	8.80287
16852312	NM_001039535	SKA1	spindle and kinetochore associated complex subunit 1	-0.769168	7.00532	-8.26076	0.000171098	0.00350345	1.3548	6.60251	6.63896	7.3946	7.38521
17103413	NM_001282166	SUV39H1	suppressor of variegation 3-9 homolog 1 (Drosophila)	-0.765512	7.84672	-8.25671	0.000171567	0.00350345	1.35182	7.47351	7.45443	8.22299	8.23597
16686796	NM_001048166	STIL	SCL/TAL1 interrupting locus	-0.766202	9.16968	-8.25466	0.000171803	0.00350345	1.35032	8.79696	8.7762	9.54359	9.56198
16822507	NM_153350	FBXL16	F-box and leucine-rich repeat protein 16	0.808759	8.14752	8.25217	0.000172092	0.00350345	1.34849	8.57812	8.52567	7.69344	7.79284
16820849	NM_001740	CALB2	calbindin 2	1.18852	5.84876	8.25038	0.000172301	0.00350345	1.34717	6.31261	6.57342	5.39436	5.11463
16930199	NM_021822	APOBEC3G	apolipoprotein B mRNA editing enzyme, catalytic polypeptide-like 3G	0.786963	7.70325	8.2396	0.000173559	0.00352094	1.33925	8.13809	8.05538	7.31014	7.30941
16761617	NM_018050	MANSC1	MANSC domain containing 1	-1.09442	5.93971	-8.23692	0.000173873	0.00352094	1.33728	5.35154	5.43346	6.32691	6.64692
16879883	NM_000251	MSH2	mutS homolog 2	-0.769094	8.79601	-8.22774	0.000174957	0.00353042	1.33052	8.43475	8.38817	9.17661	9.1845
16861914	NM_001004318	PAPL	iron/zinc purple acid phosphatase-like protein	1.04638	6.35958	8.22689	0.000175057	0.00353042	1.3299	7.007	6.75854	5.75023	5.92254
16848070	NM_001174166	SLC16A6	solute carrier family 16, member 6	0.987566	8.51703	8.22045	0.000175823	0.00353042	1.32515	8.91026	9.11135	8.10994	7.93655
16927174	NM_001190326	DGCR8	DGCR8 microprocessor complex subunit	-0.940099	6.13279	-8.21907	0.000175986	0.00353042	1.32413	5.68419	5.64129	6.48829	6.71738
16960355	AL832780	TM4SF1	transmembrane 4 L six family member 1	0.801054	9.01079	8.21788	0.000176128	0.00353042	1.32326	9.41133	9.4113	8.5569	8.66363
16705159	NM_001170406	CDK1	cyclin-dependent kinase 1	-1.04062	7.26217	-8.20526	0.000177641	0.00355354	1.31394	6.60401	6.87971	7.84226	7.72271
16984562	NM_001178055	PARP8	poly (ADP-ribose) polymerase family, member 8	0.775977	6.26182	8.19561	0.000178808	0.00356967	1.30681	6.64307	6.65655	5.90837	5.8393
16848953	NM_033452	TRIM47	tripartite motif containing 47	0.775757	8.57075	8.1892	0.000179589	0.00357801	1.30207	8.98717	8.93008	8.20409	8.16165
16752185	NM_152637	METTL7B	methyltransferase like 7B	-0.816387	10.1102	-8.18373	0.000180257	0.00358199	1.29802	9.65538	9.74855	10.5634	10.4733
17121006	NR_002816	MRPS31P5	mitochondrial ribosomal protein S31 pseudogene 5	0.871256	8.71508	8.18164	0.000180513	0.00358199	1.29648	9.08366	9.21776	8.34159	8.21731
16752834	NM_001166356	SHMT2	serine hydroxymethyltransferase 2 (mitochondrial)	0.793529	7.28597	8.16714	0.000182302	0.00361024	1.28574	7.64632	7.71915	6.85263	6.92578
16658135	NM_022114	PRDM16	PR domain containing 16	0.779625	6.62582	8.16058	0.000183119	0.00361916	1.28087	7.05513	6.97613	6.24884	6.22317
16668960	NM_022836	DCLRE1B	DNA cross-link repair 1B	-0.761534	8.00292	-8.1451	0.000185063	0.00365028	1.26937	7.61497	7.62934	8.36094	8.40645
16957170	NM_020890	KIAA1524	KIAA1524	-0.885863	7.77991	-8.13722	0.00018606	0.00366264	1.26351	7.41785	7.2561	8.16496	8.28071
16703478	NM_001172303	MASTL	microtubule associated serine/threonine kinase-like	-0.759534	8.41933	-8.12387	0.000187767	0.00368888	1.25356	8.0508	8.02834	8.82013	8.77807
17016956	NM_007243	NRM	nurim (nuclear envelope membrane protein)	-0.843328	6.61718	-8.11547	0.000188848	0.00369681	1.2473	6.12547	6.26555	6.99607	7.0816
16819325	NM_001010989	HERPUD1	homocysteine-inducible, endoplasmic reticulum stress-inducible, ubiquitin-like domain member 1	0.796507	8.9844	8.11164	0.000189344	0.00369681	1.24444	9.39372	9.3716	8.64224	8.53006
17007459	NM_002263	KIFC1	kinesin family member C1	-0.926827	7.76886	-8.10976	0.000189588	0.00369681	1.24304	7.24012	7.37077	8.1361	8.32844
17123268	NM_014831	TRANK1	tetratricopeptide repeat and ankyrin repeat containing 1	-1.02165	5.11329	-8.10916	0.000189666	0.00369681	1.24259	4.6304	4.57453	5.47864	5.76958
16755498	NM_001032283	TMPO	thymopoietin	-0.836288	8.16214	-8.10298	0.00019047	0.00370101	1.23798	7.68668	7.80132	8.52543	8.63514
16877762	ENST00000380834	CENPO	centromere protein O	-0.812247	8.09229	-8.1014	0.000190678	0.00370101	1.23679	7.68872	7.68361	8.4314	8.56543
16914117	NM_001124756	PABPC1L	poly(A) binding protein, cytoplasmic 1-like	0.81543	7.05905	8.09889	0.000191006	0.00370101	1.23492	7.41175	7.52179	6.69288	6.6098
17095150	NM_005077	TLE1	transducin-like enhancer of split 1 (E(sp1) homolog, Drosophila)	0.87508	5.72264	8.07847	0.000193702	0.00374592	1.21964	6.09532	6.22504	5.35811	5.21209
16852683	NM_021127	PMAIP1	phorbol-12-myristate-13-acetate-induced protein 1	0.805407	8.20426	8.07115	0.000194679	0.00375407	1.21415	8.56139	8.65254	7.75533	7.84779
17087107	NR_029664	MIR23B	microRNA 23b	0.817557	7.39889	8.06963	0.000194883	0.00375407	1.21301	7.87911	7.73624	6.98461	6.99562
16683541	NM_021258	IL22RA1	interleukin 22 receptor, alpha 1	-0.824363	6.1518	-8.06046	0.000196117	0.00377048	1.20613	5.67861	5.80062	6.51929	6.60866
16865112	OTTHUMT00000313724	AC008440.10	putative novel transcript	1.41918	7.44534	8.05449	0.000196925	0.00377761	1.20165	8.38754	7.92232	6.85111	6.62039
16921850	NM_001197297	GABPA	GA binding protein transcription factor, alpha subunit 60kDa	-0.807145	7.51645	-8.05208	0.000197252	0.00377761	1.19984	7.04956	7.17619	7.94186	7.89819
16866574	NM_001100122	SBNO2	strawberry notch homolog 2 (Drosophila)	0.755884	7.61084	8.03277	0.000199897	0.00382086	1.18531	7.99573	7.98184	7.26224	7.20356
16993235	NM_015111	N4BP3	NEDD4 binding protein 3	1.39508	5.93434	8.02778	0.000200588	0.00382665	1.18155	6.71788	6.54589	5.47657	4.99704
16901957	NM_152515	CKAP2L	cytoskeleton associated protein 2-like	-1.0042	7.85778	-8.01638	0.000202175	0.00384175	1.17295	7.50158	7.20979	8.37067	8.34909
17054328	NM_182491	ZFAND2A	zinc finger, AN1-type domain 2A	0.764975	7.27843	8.01443	0.000202448	0.00384175	1.17148	7.65716	7.66468	6.85518	6.93671
16966008	NM_016531	KLF3	Kruppel-like factor 3 (basic)	0.776718	7.964	8.01374	0.000202545	0.00384175	1.17096	8.40245	8.30228	7.57974	7.57155
16856828	NM_001102651	ZNF554	zinc finger protein 554	0.820546	6.48361	7.99824	0.000204731	0.00386576	1.15924	6.95191	6.83586	6.12381	6.02287
16746348	NM_001277285	IGSF9B	immunoglobulin superfamily, member 9B	0.803145	7.96517	7.99694	0.000204915	0.00386576	1.15826	8.41718	8.31631	7.51824	7.60895
16773700	ENST00000461652	B3GALTL	beta 1,3-galactosyltransferase-like	-0.836799	7.09843	-7.99429	0.000205293	0.00386576	1.15626	6.64215	6.7179	7.44084	7.59281
16731654	ENST00000533863	TAGLN	transgelin	1.40932	6.34616	7.99371	0.000205376	0.00386576	1.15582	7.11855	6.98309	5.89238	5.39062
16874109	NM_001161354	PLEKHA4	pleckstrin homology domain containing, family A (phosphoinositide binding specific) member 4	0.826212	6.98541	7.97879	0.000207512	0.0038983	1.14452	7.34637	7.45065	6.51074	6.63386
17088100	ENST00000374279	UGCG	UDP-glucose ceramide glucosyltransferase	0.741508	9.83755	7.97609	0.000207902	0.0038983	1.14248	10.2211	10.1955	9.47723	9.45637
16974146	NM_001130083	ABLIM2	actin binding LIM protein family, member 2	1.03992	6.64883	7.97093	0.000208648	0.0038983	1.13856	7.31304	7.02453	6.06124	6.19649
17111413	NM_017848	FAM120C	family with sequence similarity 120C	-0.765503	6.3518	-7.9707	0.000208683	0.0038983	1.13838	5.92677	6.01133	6.71949	6.74962
16819539	NM_001145770	GPR56	G protein-coupled receptor 56	0.739248	10.0411	7.96584	0.000209389	0.00390412	1.1347	10.4133	10.4081	9.68473	9.65824
17059628	NM_000786	CYP51A1	cytochrome P450, family 51, subfamily A, polypeptide 1	0.763032	9.52821	7.95586	0.000210847	0.00392391	1.12712	9.90316	9.91628	9.19023	9.10315
16915448	NM_001190826	FAM217B	family with sequence similarity 217, member B	-0.749009	7.37471	-7.94185	0.000212917	0.00395497	1.11646	6.98309	7.01731	7.72209	7.77634
16872803	NM_001024912	CEACAM1	carcinoembryonic antigen-related cell adhesion molecule 1 (biliary glycoprotein)	0.943423	7.03026	7.93272	0.000214276	0.00396955	1.10951	7.40696	7.59697	6.4706	6.64649
16797196	NM_138420	AHNAK2	AHNAK nucleoprotein 2	0.864793	7.67379	7.93119	0.000214505	0.00396955	1.10835	8.02507	8.18731	7.29989	7.1829
17082366	NM_000445	PLEC	plectin	0.843388	8.76748	7.92321	0.000215704	0.00398428	1.10226	9.20424	9.1741	8.25577	8.43579
16674767	NM_001357	DHX9	DEAH (Asp-Glu-Ala-His) box helicase 9	-0.771911	9.76657	-7.88957	0.000220844	0.0040649	1.07655	9.41502	9.3462	10.1092	10.1958
16766318	NM_000946	PRIM1	primase, DNA, polypeptide 1 (49kDa)	-0.795136	8.49098	-7.88926	0.000220892	0.0040649	1.07631	8.05903	8.1278	8.94882	8.82828
16898326	NM_020651	PELI1	pellino E3 ubiquitin protein ligase 1	0.763345	7.68777	7.88291	0.000221878	0.00407546	1.07145	8.11828	8.0206	7.29664	7.31555
16692580	ENST00000392948	HIST2H3PS2	histone cluster 2, H3, pseudogene 2	-0.881355	7.06434	-7.86842	0.000224147	0.00410951	1.06033	6.51618	6.73114	7.52557	7.48447
16676562	NM_001170637	SRGAP2	SLIT-ROBO Rho GTPase activating protein 2	0.817829	10.5356	7.86188	0.000225181	0.00412082	1.0553	10.9673	10.9217	10.0474	10.206
16766578	NM_001195053	DDIT3	DNA-damage-inducible transcript 3	1.02558	6.19957	7.85252	0.000226669	0.00414038	1.04811	6.66351	6.76122	5.53477	5.83879
16849635	NM_003655	CBX4	chromobox homolog 4	0.89964	7.35551	7.84946	0.000227157	0.00414163	1.04576	7.7299	7.88076	6.81597	6.99541
16821367	NM_002153	HSD17B2	hydroxysteroid (17-beta) dehydrogenase 2	1.10601	5.88374	7.84287	0.000228214	0.00415163	1.04069	6.42023	6.45325	5.51431	5.14716
16955197	NM_003392	WNT5A	wingless-type MMTV integration site family, member 5A	0.813373	8.55394	7.84081	0.000228545	0.00415163	1.0391	8.93139	8.98987	8.2232	8.07131
17119800	NR_002969	SNORA36A	small nucleolar RNA, H/ACA box 36A	0.745556	6.09872	7.83384	0.000229672	0.00415442	1.03373	6.47166	6.47134	5.687	5.76489
16923289	NM_001286258	PKNOX1	PBX/knotted 1 homeobox 1	-0.834097	6.93263	-7.83366	0.000229701	0.00415442	1.03359	6.48864	6.54253	7.43699	7.26237
16997503	NM_005779	LHFPL2	lipoma HMGIC fusion partner-like 2	0.799956	6.36834	7.83207	0.00022996	0.00415442	1.03236	6.78875	6.74788	5.89612	6.0406
17068385	ENST00000523277	GINS4	GINS complex subunit 4 (Sld5 homolog)	-1.01659	6.32028	-7.82175	0.00023164	0.00417556	1.0244	5.96507	5.65891	6.78904	6.86811
16746992	NM_001759	CCND2	cyclin D2	0.849665	6.35417	7.81918	0.000232061	0.00417556	1.02242	6.77191	6.78609	6.02787	5.8308
17112339	NM_015975	TAF9B	TAF9B RNA polymerase II, TATA box binding protein (TBP)-associated factor, 31kDa	-0.873354	8.20903	-7.81713	0.000232398	0.00417556	1.02083	7.75667	7.78803	8.53831	8.7531
17005573	NM_138720	HIST1H2BD	histone cluster 1, H2bd	-1.14754	6.00681	-7.80557	0.000234306	0.00419654	1.01189	5.23693	5.62914	6.60685	6.5543
16834302	NM_001130020	ATP6V0A1	ATPase, H+ transporting, lysosomal V0 subunit a1	-0.723909	8.50191	-7.80491	0.000234415	0.00419654	1.01139	8.14368	8.13624	8.85206	8.87568
16802389	NM_016166	PIAS1	protein inhibitor of activated STAT, 1	-0.755565	8.0141	-7.7804	0.000238522	0.00426235	0.992399	7.6579	7.61474	8.34531	8.43846
16855318	NM_016626	MEX3C	mex-3 RNA binding family member C	0.735584	9.26261	7.77326	0.000239734	0.00427626	0.986862	9.60401	9.6568	8.87219	8.91745
16869653	NM_006145	DNAJB1	DnaJ (Hsp40) homolog, subfamily B, member 1	-0.724532	9.07721	-7.76912	0.00024044	0.00428114	0.983644	8.72595	8.70394	9.45723	9.42172
17005560	ENST00000377803	HIST1H4I	histone cluster 1, H4i	-1.02652	8.65347	-7.75914	0.000242152	0.00430387	0.975886	8.01934	8.26108	9.27726	9.0562
16672426	ENST00000410620	RNA5SP60	RNA, 5S ribosomal pseudogene 60	1.04995	7.94457	7.73753	0.000245905	0.00436273	0.959067	8.31875	8.62034	7.50216	7.33703
17074958	NM_019851	FGF20	fibroblast growth factor 20	-0.790678	6.54095	-7.73259	0.000246775	0.0043703	0.955208	6.09635	6.19486	6.99356	6.87901
17106526	NM_001031855	LONRF3	LON peptidase N-terminal domain and ring finger 3	0.761648	7.40681	7.72641	0.000247864	0.00437667	0.950392	7.83983	7.73543	7.05373	6.99823
16832429	ENST00000336687	TMEM97	transmembrane protein 97	-0.72777	8.993	-7.72553	0.00024802	0.00437667	0.949701	8.6078	8.65044	9.37953	9.33424
16863091	NM_001042724	PVRL2	poliovirus receptor-related 2 (herpesvirus entry mediator B)	0.812101	8.96811	7.72152	0.000248732	0.0043814	0.946568	9.28767	9.46066	8.56853	8.5556
16941344	NM_000688	ALAS1	aminolevulinate, delta-, synthase 1	0.726234	8.89963	7.71442	0.000249996	0.00439583	0.941023	9.28758	9.23792	8.51877	8.55426
16970068	NR_003584	SNHG8	small nucleolar RNA host gene 8 (non-protein coding)	0.754571	8.19663	7.70812	0.000251124	0.00440783	0.936097	8.53121	8.61661	7.78373	7.85495
16823201	NM_152891	PRSS33	protease, serine, 33	0.885214	7.24729	7.7045	0.000251776	0.00441144	0.93326	7.57185	7.80794	6.80564	6.80372
16755692	NM_174942	GAS2L3	growth arrest-specific 2 like 3	-0.817226	7.46344	-7.69816	0.000252921	0.00441861	0.928297	7.01258	7.09707	7.95181	7.79229
16929775	XM_006724108	CDC42EP1	CDC42 effector protein (Rho GTPase binding) 1	0.790977	6.34252	7.69533	0.000253433	0.00441861	0.926086	6.7558	6.72022	6.02265	5.87141
16905371	ENST00000272748	KIAA1715	KIAA1715	-0.762299	6.96057	-7.68883	0.000254617	0.00441861	0.920986	6.64129	6.51756	7.34007	7.34337
16921338	NM_001134758	ARFRP1	ADP-ribosylation factor related protein 1	0.724011	7.90925	7.68867	0.000254646	0.00441861	0.92086	8.24176	8.30076	7.53852	7.55598
17016400	NM_021018	HIST1H3F	histone cluster 1, H3f	-1.13741	7.93013	-7.68828	0.000254717	0.00441861	0.920554	7.24456	7.47829	8.66103	8.33664
16738512	ENST00000524995	SLC43A1	solute carrier family 43 (amino acid system L transporter), member 1	0.711992	8.2272	7.68745	0.000254868	0.00441861	0.919906	8.57977	8.58662	7.87943	7.86298
16801557	NM_004701	CCNB2	cyclin B2	-0.75094	8.02812	-7.68356	0.00025558	0.00442318	0.916855	7.59835	7.70694	8.41065	8.39652
16775014	NM_001286687	CKAP2	cytoskeleton associated protein 2	-0.811797	8.89794	-7.67271	0.000257576	0.00444995	0.908339	8.5637	8.42039	9.25106	9.35662
16970536	NM_014278	HSPA4L	heat shock 70kDa protein 4-like	-0.858421	7.56412	-7.66983	0.00025811	0.00445139	0.906074	7.24147	7.02835	8.01695	7.96971
16793190	NM_001008396	WDHD1	WD repeat and HMG-box DNA binding protein 1	-0.862966	8.04747	-7.66436	0.000259126	0.00446112	0.901775	7.7218	7.51018	8.51316	8.44474
16893634	NM_022134	GAL3ST2	galactose-3-O-sulfotransferase 2	-0.752286	6.67052	-7.64856	0.000262088	0.00450427	0.889336	6.25354	6.33522	7.00548	7.08785
17070381	NM_033402	LRRCC1	leucine rich repeat and coiled-coil centrosomal protein 1	-0.750342	5.23621	-7.64027	0.000263657	0.0045157	0.882804	4.86107	4.861	5.55413	5.66863
16710126	NM_002775	HTRA1	HtrA serine peptidase 1	-0.727454	7.09964	-7.64022	0.000263667	0.0045157	0.88276	6.71298	6.75885	7.43151	7.49523
16720307	NM_001042463	TMEM80	transmembrane protein 80	-0.802259	6.53772	-7.63618	0.000264435	0.00451839	0.879578	6.12763	6.14555	7.02471	6.853
16928428	NM_005160	ADRBK2	adrenergic, beta, receptor kinase 2	0.711561	7.19522	7.63399	0.000264853	0.00451839	0.877847	7.53472	7.56727	6.85145	6.82742
17019190	NM_001164446	C6orf132	chromosome 6 open reading frame 132	0.768695	7.69585	7.6322	0.000265196	0.00451839	0.876431	8.04952	8.11087	7.2496	7.3734
16697927	OTTHUMT00000097763	RP11-134G8.8	putative novel transcript	1.18707	5.89492	7.6259	0.000266403	0.00453114	0.871461	6.42337	6.55355	5.50816	5.09462
16968246	NM_198892	BMP2K	BMP2 inducible kinase	0.712481	9.07761	7.61082	0.000269321	0.00457279	0.859535	9.41295	9.45476	8.73547	8.70728
16956621	NM_001042533	MINA	MYC induced nuclear antigen	0.792578	6.57229	7.60848	0.000269777	0.00457279	0.857681	7.01381	6.92334	6.10638	6.24561
16664005	NM_004073	PLK3	polo-like kinase 3	0.793367	6.73871	7.60592	0.000270277	0.00457342	0.855655	7.06011	7.21069	6.30582	6.37824
16705199	NM_001244638	ARID5B	AT rich interactive domain 5B (MRF1-like)	-0.751312	6.794	-7.59083	0.000273245	0.00461573	0.843697	6.47704	6.35964	7.18654	7.15277
16768936	NR_027157	TMPO-AS1	TMPO antisense RNA 1	-1.05386	6.32559	-7.58736	0.000273933	0.00461946	0.840942	5.76794	5.82936	6.67575	7.02929
16911212	NM_001281520	MCM8	minichromosome maintenance complex component 8	-0.7206	9.74274	-7.57864	0.000275669	0.00462464	0.834021	9.38258	9.3823	10.0647	10.1413
16825583	NM_178863	KCTD13	potassium channel tetramerization domain containing 13	0.703314	8.63281	7.57816	0.000275765	0.00462464	0.833639	8.97589	8.99305	8.27059	8.29172
16706779	NM_001284240	CCSER2	coiled-coil serine-rich protein 2	0.776444	7.22539	7.57654	0.000276089	0.00462464	0.832354	7.54289	7.68434	6.80811	6.86624
17096827	uc004bdh.3	KLF4	Kruppel-like factor 4 (gut)	1.04587	7.00795	7.57643	0.000276112	0.00462464	0.832265	7.67339	7.38837	6.59071	6.37931
16999147	NM_173666	DTWD2	DTW domain containing 2	-1.03563	6.34238	-7.5715	0.000277102	0.00463337	0.828344	5.65178	5.99736	6.88437	6.83603
16773840	NM_000059	BRCA2	breast cancer 2, early onset	-0.793251	8.63441	-7.56305	0.000278807	0.00465401	0.821625	8.15221	8.32337	9.03518	9.0269
16977820	NM_016245	HSD17B11	hydroxysteroid (17-beta) dehydrogenase 11	-0.731358	8.63576	-7.55814	0.000279804	0.00466158	0.817715	8.26219	8.27798	9.05013	8.95275
16738409	NM_033396	TNKS1BP1	tankyrase 1 binding protein 1, 182kDa	0.738833	7.65215	7.5531	0.000280832	0.00466158	0.8137	7.98512	8.05802	7.24127	7.3242
16660700	NM_020362	PITHD1	PITH (C-terminal proteasome-interacting domain of thioredoxin-like) domain containing 1	-0.706848	6.78794	-7.55256	0.000280941	0.00466158	0.813272	6.44545	6.42358	7.16379	7.11894
16717005	NM_152309	PIK3AP1	phosphoinositide-3-kinase adaptor protein 1	0.737032	7.77951	7.55065	0.000281333	0.00466158	0.811746	8.10671	8.18934	7.37607	7.44592
16851900	NM_001143826	MAPRE2	microtubule-associated protein, RP/EB family, member 2	-0.794373	6.85704	-7.54789	0.000281898	0.00466158	0.809547	6.38145	6.53826	7.21654	7.29191
16712879	NM_003174	SVIL	supervillin	0.747332	6.1762	7.54695	0.000282091	0.00466158	0.808798	6.60983	6.4899	5.78974	5.81533
16863307	NM_003370	VASP	vasodilator-stimulated phosphoprotein	0.742305	9.86338	7.53406	0.000284751	0.00469135	0.798515	10.2577	10.2114	9.4381	9.54636
17102230	NM_016937	POLA1	polymerase (DNA directed), alpha 1, catalytic subunit	-0.797251	9.04485	-7.53363	0.000284842	0.00469135	0.798165	8.55719	8.73525	9.44636	9.44059
16763666	NM_001098531	RAPGEF3	Rap guanine nucleotide exchange factor (GEF) 3	0.859282	6.9792	7.53057	0.000285477	0.00469398	0.795726	7.32402	7.49366	6.47083	6.62828
16773946	NM_002915	RFC3	replication factor C (activator 1) 3, 38kDa	-0.885492	9.20986	-7.52466	0.000286712	0.00470266	0.790997	8.65304	8.88119	9.7061	9.59911
16968735	NM_001165136	HERC6	HECT and RLD domain containing E3 ubiquitin protein ligase family member 6	-0.718585	6.25608	-7.52349	0.000286957	0.00470266	0.790062	5.91812	5.87547	6.65083	6.57992
16663514	NM_001255	CDC20	cell division cycle 20	-0.695194	9.87161	-7.51704	0.000288311	0.00471703	0.784904	9.52595	9.52208	10.2201	10.2183
16848938	NM_012478	WBP2	WW domain binding protein 2	0.734262	9.34782	7.51232	0.000289307	0.0047255	0.781125	9.73363	9.69628	9.03221	8.92918
17086167	NM_001098802	CEP78	centrosomal protein 78kDa	-0.848198	8.60985	-7.49988	0.000291949	0.0047608	0.77116	8.07427	8.29724	9.05054	9.01736
16732985	NM_001145290	SLC37A2	solute carrier family 37 (glucose-6-phosphate transporter), member 2	0.745863	5.48811	7.49626	0.000292725	0.00476558	0.768253	5.88402	5.83807	5.05591	5.17446
17088408	NM_153045	C9orf91	chromosome 9 open reading frame 91	0.826529	7.04646	7.49021	0.000294024	0.00477885	0.763401	7.36071	7.55875	6.60064	6.66576
16849321	NM_003016	SRSF2	serine/arginine-rich splicing factor 2	-0.881107	9.36242	-7.48573	0.00029499	0.00478669	0.759804	8.80286	9.04087	9.84458	9.76137
17047707	ENST00000416283	PHTF2	putative homeodomain transcription factor 2	-0.70329	7.69075	-7.48164	0.000295877	0.00479321	0.756514	7.3099	7.36831	8.04328	8.04151
16952782	NM_015444	TMEM158	transmembrane protein 158 (gene/pseudogene)	0.833743	6.90601	7.47666	0.000296959	0.00479514	0.752515	7.31741	7.32836	6.38139	6.59689
16807605	NM_007280	OIP5	Opa interacting protein 5	-1.24877	5.91174	-7.47604	0.000297095	0.00479514	0.752011	5.11706	5.45765	6.70639	6.36585
16944096	NM_001690	ATP6V1A	ATPase, H+ transporting, lysosomal 70kDa, V1 subunit A	-0.72751	8.82508	-7.4744	0.000297452	0.00479514	0.750695	8.4777	8.44495	9.2388	9.13887
17075426	NM_003842	TNFRSF10B	tumor necrosis factor receptor superfamily, member 10b	0.737349	7.65821	7.47057	0.00029829	0.00479844	0.747612	8.08439	7.96939	7.27338	7.3057
16782548	NM_001291556	PCK2	phosphoenolpyruvate carboxykinase 2 (mitochondrial)	1.06176	7.09103	7.46675	0.000299126	0.00479844	0.744541	7.73652	7.5073	6.70792	6.41238
17005564	ENST00000314088	HIST1H2AC	histone cluster 1, H2ac	-0.70817	8.69671	-7.46565	0.00029937	0.00479844	0.74365	8.31935	8.3659	9.02258	9.07901
16708802	NM_006951	TAF5	TAF5 RNA polymerase II, TATA box binding protein (TBP)-associated factor, 100kDa	-0.724248	7.24507	-7.4646	0.000299599	0.00479844	0.74281	6.89194	6.87396	7.65723	7.55717
16756447	NM_001017523	BTBD11	BTB (POZ) domain containing 11	0.727302	6.63183	7.45975	0.000300668	0.00480778	0.738904	6.94324	7.04771	6.25674	6.27961
16685076	NM_005066	SFPQ	splicing factor proline/glutamine-rich	-0.702689	7.67502	-7.4523	0.000302322	0.0048264	0.732893	7.35397	7.29338	8.03634	8.01638
16748590	NM_001423	EMP1	epithelial membrane protein 1	0.811727	9.21086	7.44974	0.00030289	0.00482768	0.730833	9.55103	9.68241	8.72991	8.88008
17111219	NM_001281463	SMC1A	structural maintenance of chromosomes 1A	-0.703236	9.84967	-7.43819	0.000305479	0.00486109	0.721503	9.52953	9.46657	10.1883	10.2143
16746379	NM_015261	NCAPD3	non-SMC condensin II complex, subunit D3	-0.7229	8.48056	-7.43181	0.000306916	0.00487612	0.716354	8.16484	8.07337	8.81678	8.86723
16850517	NM_006101	NDC80	NDC80 kinetochore complex component	-0.768657	8.23433	-7.42513	0.000308432	0.00489234	0.710952	7.89676	7.80324	8.68425	8.55307
16864034	NM_001195227	TRPM4	transient receptor potential cation channel, subfamily M, member 4	0.795867	6.51903	7.4228	0.000308964	0.00489293	0.709062	6.89747	6.93646	6.0292	6.21299
16692624	NR_036461	HIST2H2BC	histone cluster 2, H2bc (pseudogene)	-0.944541	6.74912	-7.41815	0.000310026	0.00489649	0.705298	6.12533	6.42836	7.21946	7.22332
16677425	NM_016343	CENPF	centromere protein F, 350/400kDa	-0.712788	9.61649	-7.41539	0.000310658	0.00489649	0.703067	9.21522	9.30497	9.96592	9.97984
17006659	NM_000594	TNF	tumor necrosis factor	0.936228	5.24984	7.41532	0.000310676	0.00489649	0.703003	5.62648	5.80942	4.8991	4.66434
16901161	XM_005263862	TBC1D8	TBC1 domain family, member 8 (with GRAM domain)	0.749282	7.04952	7.41252	0.000311317	0.00489879	0.700741	7.37941	7.46892	6.72957	6.62019
16817017	NM_005030	PLK1	polo-like kinase 1	-0.707131	10.4874	-7.40607	0.000312806	0.00491438	0.695511	10.1008	10.1667	10.8163	10.8656
16911149	NR_028370	PCNA-AS1	PCNA antisense RNA 1	-1.15824	7.76205	-7.39314	0.000315813	0.00495376	0.685015	7.01963	7.34623	8.48698	8.19536
17093417	NM_020702	KIAA1161	KIAA1161	-0.71327	7.68897	-7.3826	0.000318288	0.00498451	0.676452	7.34928	7.31539	8.09098	8.00022
17067102	NM_152562	CDCA2	cell division cycle associated 2	-0.733792	8.43477	-7.38051	0.000318783	0.00498451	0.674749	8.11288	8.02287	8.84606	8.75728
16975918	NM_000232	SGCB	sarcoglycan, beta (43kDa dystrophin-associated glycoprotein)	-0.959854	7.10895	-7.37547	0.000319977	0.0049893	0.670646	6.58515	6.67289	7.74121	7.43654
16689828	NM_004815	ARHGAP29	Rho GTPase activating protein 29	0.78105	6.14868	7.37387	0.000320357	0.0049893	0.669346	6.47842	6.6	5.69258	5.82374
16705715	NM_004096	EIF4EBP2	eukaryotic translation initiation factor 4E binding protein 2	-0.818481	10.7103	-7.37283	0.000320604	0.0049893	0.668501	10.1967	10.4055	11.1399	11.0993
16958759	NM_001136053	TPRA1	transmembrane protein, adipocyte asscociated 1	0.899637	6.76467	7.36685	0.00032203	0.00500362	0.663631	7.13061	7.29837	6.20517	6.42454
16829801	NM_001124758	SPNS2	spinster homolog 2 (Drosophila)	0.890861	7.41344	7.36281	0.000322999	0.00501079	0.660336	7.98253	7.73521	6.91364	7.02237
16834176	OTTHUMT00000257901	AC019349.5	putative novel transcript	0.856934	6.35397	7.35511	0.000324852	0.00503076	0.65406	6.90426	6.66062	5.91088	5.94013
16662317	NM_153212	GJB4	gap junction protein, beta 4, 30.3kDa	1.65303	6.41788	7.35324	0.000325304	0.00503076	0.652532	7.14112	7.34766	5.252	5.93072
17088300	uc004bid.3	ZNF618	zinc finger protein 618	-0.826605	6.44703	-7.35047	0.000325976	0.00503327	0.65027	6.02832	6.03914	6.74969	6.97098
17118868	NR_030345	MIR614	microRNA 614	0.687402	9.92131	7.34682	0.000326863	0.00503821	0.647286	10.2452	10.2848	9.56297	9.59225
16832231	OTTHUMT00000431344	RP11-283C24.1	novel transcript	0.763809	8.35211	7.34496	0.000327315	0.00503821	0.64577	8.65245	8.81559	7.9815	7.95892
16892750	NM_014521	SH3BP4	SH3-domain binding protein 4	-0.695444	7.06987	-7.33319	0.000330197	0.00506014	0.636149	6.75489	6.6894	7.4335	7.40168
17114220	NM_001170704	MBNL3	muscleblind-like splicing regulator 3	-0.898498	5.64175	-7.32905	0.000331218	0.00506014	0.632764	5.18924	5.19577	6.2303	5.95171
17056587	NM_015283	DPY19L1	dpy-19-like 1 (C. elegans)	-0.863495	5.9305	-7.32492	0.00033224	0.00506014	0.629382	5.56024	5.43726	6.47287	6.25161
16871000	NR_027301	LINC00662	long intergenic non-protein coding RNA 662	0.680159	5.58447	7.32147	0.000333098	0.00506014	0.626551	5.93342	5.91569	5.25695	5.23184
16733104	NM_001114121	CHEK1	checkpoint kinase 1	-0.682067	8.11446	-7.32133	0.000333132	0.00506014	0.626438	7.77901	7.76785	8.47424	8.43675
16698883	NM_000228	LAMB3	laminin, beta 3	0.776349	7.7735	7.32101	0.000333212	0.00506014	0.626175	8.19156	8.13178	7.47006	7.30059
16782187	ENST00000548162	MMP14	matrix metallopeptidase 14 (membrane-inserted)	0.707117	7.81265	7.31939	0.000333615	0.00506014	0.624849	8.14416	8.18825	7.50218	7.416
16981506	NM_001130688	HMGB2	high mobility group box 2	-0.703962	7.15387	-7.31842	0.000333857	0.00506014	0.624052	6.83678	6.767	7.53558	7.47612
16802204	NM_001287821	ZWILCH	zwilch kinetochore protein	-0.686945	8.43983	-7.31795	0.000333973	0.00506014	0.623671	8.07463	8.11807	8.80086	8.76574
16829852	NM_001001683	MED11	mediator complex subunit 11	-0.775391	7.0181	-7.31698	0.000334217	0.00506014	0.622871	6.59925	6.66157	7.32179	7.4898
17121506	NM_001204883	RAB43	RAB43, member RAS oncogene family	0.677676	8.6032	7.31196	0.000335472	0.00506014	0.618756	8.94274	8.94135	8.25369	8.27504
16857467	NM_001288962	TRIP10	thyroid hormone receptor interactor 10	0.787896	8.65844	7.31098	0.000335719	0.00506014	0.61795	8.98655	9.11822	8.19488	8.33409
16698923	NM_001206696	IRF6	interferon regulatory factor 6	0.821148	6.78056	7.31097	0.000335721	0.00506014	0.617943	7.18547	7.1968	6.25977	6.4802
16794815	NM_031464	RPS6KL1	ribosomal protein S6 kinase-like 1	0.724635	6.00694	7.30737	0.000336625	0.00506014	0.61499	6.31068	6.42783	5.62433	5.66491
17012379	NM_001012507	CENPW	centromere protein W	-0.768681	6.99491	-7.30701	0.000336715	0.00506014	0.614697	6.68744	6.5337	7.33889	7.41961
16912379	NM_012112	TPX2	TPX2, microtubule-associated	-0.731929	10.7151	-7.30436	0.000337384	0.00506014	0.612519	10.2889	10.4094	11.0522	11.11
16830469	NM_000747	CHRNB1	cholinergic receptor, nicotinic, beta 1 (muscle)	-0.697311	8.30841	-7.30411	0.000337445	0.00506014	0.61232	8.00082	7.91869	8.65735	8.65679
16816650	NM_001128301	LYRM1	LYR motif containing 1	0.688765	7.80859	7.29923	0.000338681	0.0050624	0.608307	8.17367	8.13228	7.48928	7.43914
16922584	NM_005441	CHAF1B	chromatin assembly factor 1, subunit B (p60)	-0.89186	8.42844	-7.29847	0.000338873	0.0050624	0.607685	7.84634	8.11868	8.89849	8.85025
17050081	XM_005250224	CDHR3	cadherin-related family member 3	0.850481	5.67717	7.29745	0.000339133	0.0050624	0.606844	6.08613	6.11869	5.13022	5.37364
16674319	NM_014864	FAM20B	family with sequence similarity 20, member B	-0.814777	7.39032	-7.29407	0.000339991	0.00506756	0.604069	6.92953	7.03634	7.70329	7.89213
17081401	NM_001135242	NDRG1	N-myc downstream regulated 1	0.894863	6.7591	7.2889	0.00034131	0.00507956	0.599818	7.0891	7.32397	6.23582	6.38753
16695888	NM_000696	ALDH9A1	aldehyde dehydrogenase 9 family, member A1	-0.723407	7.57183	-7.28424	0.000342505	0.00508968	0.595982	7.14748	7.27278	7.93577	7.9313
16977378	NM_001080506	TMEM150C	transmembrane protein 150C	-1.11602	5.93239	-7.28105	0.000343325	0.0050942	0.593356	5.58451	5.16425	6.51547	6.46534
16821869	NM_030928	CDT1	chromatin licensing and DNA replication factor 1	-0.73677	8.6923	-7.27677	0.000344428	0.0051029	0.589837	8.33865	8.30917	8.99084	9.13052
16955291	NM_001128615	ARHGEF3	Rho guanine nucleotide exchange factor (GEF) 3	0.672096	6.49646	7.26788	0.000346735	0.0051294	0.582505	6.83311	6.83191	6.16041	6.16041
16910728	NM_001040022	SIRPA	signal-regulatory protein alpha	-0.710075	7.66058	-7.26427	0.000347675	0.00513561	0.579534	7.35026	7.26082	7.98388	8.04735
17125158	NR_038955	LINC00963	long intergenic non-protein coding RNA 963	-0.679713	7.44062	-7.25887	0.000349091	0.00514883	0.575072	7.12063	7.0809	7.79645	7.7645
16819484	NM_002996	CX3CL1	chemokine (C-X3-C motif) ligand 1	0.750687	6.51551	7.25608	0.000349822	0.00515192	0.572775	6.86171	6.92	6.215	6.06534
16778647	ENST00000607312	TUSC8	tumor suppressor candidate 8 (non-protein coding)	-0.716714	7.24183	-7.25204	0.000350887	0.00515335	0.569437	6.85723	6.90971	7.65455	7.54583
16705810	NM_001244889	UNC5B	unc-5 homolog B (C. elegans)	1.01256	7.09617	7.25019	0.000351377	0.00515335	0.567904	7.68169	7.52321	6.42695	6.75283
16943435	NM_024548	CEP97	centrosomal protein 97kDa	-0.728333	6.863	-7.24938	0.000351591	0.00515335	0.567235	6.54325	6.45442	7.27865	7.17569
16691314	NM_005725	TSPAN2	tetraspanin 2	0.796621	7.8563	7.24757	0.000352069	0.00515335	0.565742	8.15987	8.34935	7.49804	7.41794
16780808	NM_024089	KDELC1	KDEL (Lys-Asp-Glu-Leu) containing 1	-0.790024	6.46581	-7.24585	0.000352526	0.00515335	0.564318	5.97201	6.16958	6.8453	6.87633
16789926	NM_182849	CCNB1IP1	cyclin B1 interacting protein 1, E3 ubiquitin protein ligase	0.776842	6.43782	7.24025	0.000354015	0.00516747	0.559689	6.74808	6.90441	5.99684	6.10197
16839290	XR_429832	LOC100130876	uncharacterized LOC100130876	-0.910152	5.91015	-7.23477	0.000355481	0.00517871	0.555153	5.31898	5.59117	6.30794	6.42251
16662623	NM_025079	ZC3H12A	zinc finger CCCH-type containing 12A	0.88506	7.67867	7.23345	0.000355833	0.00517871	0.554064	8.06492	8.17749	7.10937	7.36292
17016457	NM_080593	HIST1H2BK	histone cluster 1, H2bk	-0.687494	10.7781	-7.23084	0.000356536	0.0051813	0.551899	10.4572	10.4115	11.1525	11.0912
16748620	NM_001286515	ATF7IP	activating transcription factor 7 interacting protein	-0.673584	8.0886	-7.22865	0.000357124	0.00518224	0.550086	7.73404	7.76958	8.43425	8.41654
16678496	NM_175055	HIST3H2BB	histone cluster 3, H2bb	-0.849419	7.02328	-7.22597	0.000357849	0.00518514	0.547861	6.47403	6.72312	7.43147	7.46451
17016496	NM_003510	HIST1H2AK	histone cluster 1, H2ak	-1.35327	6.75202	-7.2188	0.00035979	0.00520563	0.54192	5.79323	6.35754	7.43782	7.41949
16779546	NM_001042517	DIAPH3	diaphanous-related formin 3	-0.681178	8.90637	-7.21156	0.000361763	0.00522652	0.535913	8.59559	8.53597	9.26185	9.23207
17114643	NM_001010986	ATP11C	ATPase, class VI, type 11C	-0.687319	9.45236	-7.20846	0.000362613	0.00523115	0.533335	9.14205	9.07534	9.8185	9.77353
16694701	NM_001199723	CRABP2	cellular retinoic acid binding protein 2	-0.715408	8.95859	-7.20475	0.00036363	0.00523818	0.530257	8.66255	8.53922	9.32717	9.30541
16873296	NM_001142502	PPP1R13L	protein phosphatase 1, regulatory subunit 13 like	0.706633	8.80711	7.19858	0.000365331	0.00524823	0.52513	9.21739	9.10346	8.45146	8.45612
17093661	ENST00000322813	FAM214B	family with sequence similarity 214, member B	0.765918	7.26125	7.19694	0.000365786	0.00524823	0.523762	7.65104	7.63738	6.96922	6.78736
16805474	NM_183376	ARRDC4	arrestin domain containing 4	0.674256	6.53737	7.19645	0.000365921	0.00524823	0.523358	6.85164	6.89735	6.21279	6.18768
16883776	NM_003048	SLC9A2	solute carrier family 9, subfamily A (NHE2, cation proton antiporter 2), member 2	1.20258	5.42091	7.19421	0.000366544	0.00524955	0.521489	5.78699	6.25741	4.87244	4.7668
16836457	NM_058216	RAD51C	RAD51 paralog C	-0.705488	7.11844	-7.18383	0.000369438	0.00528334	0.512849	6.81635	6.71505	7.44455	7.49782
16748196	NR_002814	LOC374443	C-type lectin domain family 2, member D pseudogene	0.916503	6.93239	7.18118	0.00037018	0.0052863	0.510645	7.28607	7.4952	6.58483	6.36344
16807139	NM_001220482	MEIS2	Meis homeobox 2	-1.08287	5.52097	-7.17836	0.000370974	0.00528712	0.50829	5.17815	4.78092	6.00651	6.1183
16873848	NM_000234	LIG1	ligase I, DNA, ATP-dependent	-0.728906	8.01426	-7.17706	0.00037134	0.00528712	0.507208	7.64813	7.65148	8.30604	8.45138
17075478	NM_002318	LOXL2	lysyl oxidase-like 2	0.82062	8.13801	7.17466	0.000372017	0.00528712	0.505206	8.48797	8.60867	7.82738	7.62802
16671217	NM_023015	INTS3	integrator complex subunit 3	-0.707286	7.87479	-7.17338	0.000372378	0.00528712	0.504142	7.48427	7.55803	8.1821	8.27477
16975803	NM_015030	FRYL	FRY-like	-0.673497	7.49309	-7.16869	0.000373706	0.00529837	0.50023	7.12872	7.18396	7.83768	7.822
16869570	ENST00000536649	PRKACA	protein kinase, cAMP-dependent, catalytic, alpha	-0.765462	8.58283	-7.16296	0.000375336	0.00531386	0.495447	8.24299	8.15721	9.04776	8.88336
16954856	NM_018313	PBRM1	polybromo 1	-0.685749	8.99963	-7.15806	0.000376739	0.00532609	0.491346	8.67892	8.63459	9.30528	9.37973
17016110	NM_001195610	DCDC2	doublecortin domain containing 2	-0.763952	6.66976	-7.15388	0.000377938	0.0053354	0.487857	6.19661	6.37895	7.03636	7.0671
17074462	OTTHUMT00000375022	CTA-398F10.2	novel transcript	-0.739556	5.92911	-7.15128	0.000378688	0.00533836	0.485679	5.47921	5.63945	6.30117	6.29661
16959325	ENST00000260810	TOPBP1	topoisomerase (DNA) II binding protein 1	-0.673341	8.50436	-7.14678	0.000379984	0.00534901	0.481922	8.16237	8.17302	8.87179	8.81027
16919022	NM_015474	SAMHD1	SAM domain and HD domain 1	-0.663777	9.22197	-7.14375	0.000380864	0.00535377	0.479381	8.88334	8.89682	9.56802	9.53969
17102632	NM_001098790	MID1IP1	MID1 interacting protein 1	0.676937	7.97692	7.13906	0.000382228	0.00535808	0.475452	8.34857	8.28221	7.65318	7.62374
17057369	ENST00000446531	H2AFV	H2A histone family, member V	-0.771256	7.64206	-7.13888	0.000382281	0.00535808	0.4753	7.18837	7.3245	8.09638	7.95899
17101876	ENST00000487842	SCML1	sex comb on midleg-like 1 (Drosophila)	0.729305	7.57474	7.1371	0.000382798	0.00535808	0.473815	7.9116	7.96719	7.14014	7.28004
17025576	NM_003181	T	T, brachyury homolog (mouse)	-0.667872	6.31072	-7.13006	0.00038486	0.00537932	0.467912	5.95141	6.00215	6.64949	6.63982
16673525	ENST00000494797	ATP1B1	ATPase, Na+/K+ transporting, beta 1 polypeptide	-0.7934	7.18017	-7.1268	0.000385819	0.00538246	0.465176	6.68663	6.88032	7.62309	7.53066
16661255	NM_006015	ARID1A	AT rich interactive domain 1A (SWI-like)	-0.659007	8.43445	-7.12559	0.000386173	0.00538246	0.464166	8.10424	8.10565	8.76168	8.76623
16937966	NM_016474	CCDC174	coiled-coil domain containing 174	0.700796	6.32057	7.12226	0.000387158	0.00538708	0.461366	6.66472	6.67721	6.02803	5.91231
16760621	NM_031299	CDCA3	cell division cycle associated 3	-0.747161	7.26833	-7.11949	0.000387976	0.00538708	0.459046	6.92184	6.86766	7.56039	7.72343
16681082	NM_012405	ICMT	isoprenylcysteine carboxyl methyltransferase	-0.672766	8.91455	-7.11714	0.000388673	0.00538708	0.457074	8.60603	8.5503	9.23158	9.27028
16818808	NM_033119	NKD1	naked cuticle homolog 1 (Drosophila)	-0.726061	10.5733	-7.1171	0.000388685	0.00538708	0.457039	10.2509	10.1696	10.8738	10.9989
16865050	NR_030196	MIR518B	microRNA 518b	0.702896	5.64451	7.11254	0.000390041	0.0053983	0.453211	5.93562	6.0563	5.29351	5.29262
16818359	NM_001042454	TGFB1I1	transforming growth factor beta 1 induced transcript 1	1.01935	8.65451	7.10622	0.000391931	0.00541687	0.447898	9.05113	9.27723	8.29734	7.99233
16796667	ENST00000554912	SLC25A29	solute carrier family 25 (mitochondrial carnitine/acylcarnitine carrier), member 29	0.752439	7.42411	7.10091	0.000393528	0.00543134	0.443429	7.77714	7.82352	7.13441	6.96138
16824470	NM_015161	ARL6IP1	ADP-ribosylation factor-like 6 interacting protein 1	-0.71057	10.4238	-7.09866	0.000394205	0.00543311	0.441538	10.0151	10.1218	10.8185	10.7396
16674805	NM_002293	LAMC1	laminin, gamma 1 (formerly LAMB2)	0.65881	9.76309	7.09277	0.000395987	0.00545007	0.436579	10.0911	10.0938	9.41864	9.44872
17121348	ENST00000532415	PKD1P5	polycystic kidney disease 1 (autosomal dominant) pseudogene 5	0.681804	8.22661	7.07781	0.000400559	0.00548904	0.42396	8.58096	8.55406	7.93044	7.84098
16802497	NM_001104554	PAQR5	progestin and adipoQ receptor family member V	0.719294	8.1642	7.07696	0.000400818	0.00548904	0.423249	8.59337	8.45433	7.82687	7.78224
17058870	ENST00000222902	CCL24	chemokine (C-C motif) ligand 24	-0.904328	5.31898	-7.07645	0.000400974	0.00548904	0.42282	4.73315	5.00047	5.84497	5.69731
16699877	NM_002296	LBR	lamin B receptor	-0.683467	8.59852	-7.07298	0.000402047	0.00548904	0.419883	8.24697	8.2666	8.98778	8.89272
16952769	NM_022842	CDCP1	CUB domain containing protein 1	0.682672	11.2514	7.07225	0.00040227	0.00548904	0.419273	11.5589	11.6266	10.8762	10.944
17119882	NR_024455	LINC01134	long intergenic non-protein coding RNA 1134	-0.661039	5.29671	-7.07119	0.000402599	0.00548904	0.418375	4.96238	4.97001	5.65064	5.60383
16682044	NR_024279	FLJ37453	uncharacterized LOC729614	-0.663704	5.38997	-7.07084	0.000402708	0.00548904	0.418077	5.03252	5.08371	5.73285	5.7108
17053100	XM_005249929	ZNF783	zinc finger family member 783	0.869474	7.75852	7.0677	0.000403679	0.00549471	0.415427	8.25605	8.13046	7.19815	7.44942
16881138	NM_001202513	MXD1	MAX dimerization protein 1	0.753602	7.81172	7.05815	0.000406653	0.0055199	0.407356	8.24401	8.13302	7.36104	7.50879
16945239	NR_026954	LOC90246	uncharacterized LOC90246	0.853614	5.75136	7.05755	0.000406841	0.0055199	0.406849	6.31286	6.04348	5.31594	5.33317
16981502	OTTHUMT00000362359	RP11-798M19.3	novel transcript	-1.19159	4.95071	-7.05635	0.000407219	0.0055199	0.405828	4.14087	4.56895	5.42809	5.66491
16758671	NM_001143850	TCTN2	tectonic family member 2	-0.719405	7.20874	-7.05461	0.000407764	0.0055199	0.404357	6.77467	6.92341	7.57106	7.56583
17110817	NM_006150	PRICKLE3	prickle homolog 3 (Drosophila)	0.677847	8.38144	7.05274	0.000408351	0.00552028	0.402775	8.69908	8.74164	8.08255	8.00248
17008769	NM_033112	RRP36	ribosomal RNA processing 36 homolog (S. cerevisiae)	-0.65446	8.93633	-7.04759	0.000409972	0.00553462	0.398419	8.60108	8.61712	9.27587	9.25125
16667546	NM_000028	AGL	amylo-alpha-1, 6-glucosidase, 4-alpha-glucanotransferase	-0.753154	7.69655	-7.0438	0.00041117	0.00554322	0.395209	7.4017	7.23824	8.11735	8.0289
17104484	NM_012310	KIF4A	kinesin family member 4A	-0.876065	8.60491	-7.03511	0.000413934	0.00557119	0.387842	8.02252	8.31123	9.04025	9.04563
16784299	NM_001130851	CDKN3	cyclin-dependent kinase inhibitor 3	-0.769311	8.80821	-7.03374	0.000414372	0.00557119	0.386677	8.39058	8.45653	9.28845	9.09728
16852206	NM_138443	HAUS1	HAUS augmin-like complex, subunit 1	-0.67861	5.37263	-7.02674	0.000416616	0.00559374	0.380739	5.05171	5.01494	5.75649	5.66738
17110625	OTTHUMT00000056514	AF196970.3	novel transcript	-0.800182	5.89922	-7.02196	0.000418157	0.00560682	0.376677	5.4596	5.53866	6.4076	6.19102
16757902	NM_001037494	DYNLL1	dynein, light chain, LC8-type 1	-0.671753	6.1596	-7.01441	0.000420603	0.00563167	0.370261	5.78554	5.86192	6.51547	6.47549
16688753	ENST00000294623	FUBP1	far upstream element (FUSE) binding protein 1	-0.744064	8.17565	-7.01195	0.000421406	0.00563167	0.368163	7.71728	7.88996	8.57344	8.52193
17075448	NM_003840	TNFRSF10D	tumor necrosis factor receptor superfamily, member 10d, decoy with truncated death domain	-0.744179	7.97088	-7.00987	0.000422083	0.00563167	0.366397	7.67826	7.51933	8.3858	8.30015
16752217	NM_005811	GDF11	growth differentiation factor 11	-0.742967	7.06758	-7.00924	0.00042229	0.00563167	0.365859	6.61954	6.77265	7.39233	7.48579
16845172	NM_001256015	PSMC3IP	PSMC3 interacting protein	-0.699512	7.25356	-7.00614	0.000423305	0.0056376	0.363218	6.8548	6.95281	7.64628	7.56036
16867766	ENST00000423145	CD70	CD70 molecule	0.864083	8.22147	7.00025	0.000425238	0.00564866	0.358205	8.66335	8.64367	7.93063	7.64823
17102210	NM_001142386	PDK3	pyruvate dehydrogenase kinase, isozyme 3	-0.966189	6.75943	-7.00013	0.000425279	0.00564866	0.3581	6.11614	6.43654	7.3187	7.16636
17080630	NM_021021	SNTB1	syntrophin, beta 1 (dystrophin-associated protein A1, 59kDa, basic component 1)	0.650844	8.76651	6.99636	0.000426521	0.00565676	0.35489	9.085	9.09888	8.45717	8.42501
16996201	NM_019030	DHX29	DEAH (Asp-Glu-Ala-His) box polypeptide 29	-0.652248	7.44676	-6.99261	0.000427763	0.00565676	0.351691	7.10547	7.13581	7.78761	7.75817
16777185	NM_004004	GJB2	gap junction protein, beta 2, 26kDa	0.94851	7.90688	6.99237	0.000427841	0.00565676	0.351492	8.32688	8.4354	7.59564	7.26961
16948320	NM_003940	USP13	ubiquitin specific peptidase 13 (isopeptidase T-3)	-0.651965	7.86047	-6.99057	0.000428441	0.00565676	0.349951	7.55315	7.51582	8.19599	8.17692
17010941	NM_001010853	PM20D2	peptidase M20 domain containing 2	-0.674465	8.72655	-6.98963	0.000428751	0.00565676	0.349155	8.35366	8.42497	9.03207	9.09549
16852789	NM_194449	PHLPP1	PH domain and leucine rich repeat protein phosphatase 1	-0.688603	7.03483	-6.98505	0.000430277	0.00566933	0.345246	6.74809	6.63296	7.36555	7.3927
16816756	NM_001164579	C16orf52	chromosome 16 open reading frame 52	0.65412	6.41515	6.97984	0.00043202	0.00568472	0.340798	6.72007	6.76436	6.10231	6.07387
17089982	NM_001135917	DOLPP1	dolichyldiphosphatase 1	-0.936856	7.85647	-6.96506	0.000437008	0.00574271	0.328166	7.24501	7.53106	8.23469	8.4151
16682989	ENST00000264205	ECE1	endothelin converting enzyme 1	0.72705	9.52893	6.96093	0.000438415	0.00575355	0.324629	9.97437	9.81053	9.14654	9.18426
16698756	NM_001083924	C1orf116	chromosome 1 open reading frame 116	0.650453	8.88638	6.95051	0.000441985	0.00579076	0.315707	9.20341	9.2198	8.53767	8.58463
17108428	NM_017514	PLXNA3	plexin A3	0.647959	8.1385	6.94924	0.000442423	0.00579076	0.314615	8.46664	8.45831	7.83476	7.79427
16804228	NR_003654	SCAND2P	SCAN domain containing 2 pseudogene	0.714901	5.95393	6.94221	0.000444854	0.0058126	0.308587	6.27136	6.3514	5.52901	5.66395
17092579	NM_001168339	TTC39B	tetratricopeptide repeat domain 39B	0.934781	5.09071	6.93933	0.000445853	0.0058126	0.306118	5.39004	5.72616	4.6007	4.64593
16918445	NM_005225	E2F1	E2F transcription factor 1	-0.823494	8.15094	-6.93833	0.000446201	0.0058126	0.305257	7.741	7.73739	8.69148	8.4339
17098048	NM_001139442	TTLL11	tubulin tyrosine ligase-like family, member 11	0.737738	6.16146	6.93763	0.000446444	0.0058126	0.304659	6.45453	6.60614	5.84274	5.74245
16725393	NM_024092	TMEM109	transmembrane protein 109	-0.660357	9.5473	-6.93271	0.000448162	0.00582728	0.300433	9.17873	9.25552	9.86806	9.8869
17046181	NM_018697	LANCL2	LanC lantibiotic synthetase component C-like 2 (bacterial)	-0.642028	7.42268	-6.93059	0.000448904	0.00582926	0.298611	7.10368	7.09965	7.73441	7.75297
17011079	NM_024641	MANEA	mannosidase, endo-alpha	-0.875426	7.24217	-6.92228	0.000451828	0.00585808	0.291464	6.71712	6.8918	7.80103	7.55875
16708249	NM_005063	SCD	stearoyl-CoA desaturase (delta-9-desaturase)	0.68426	11.6382	6.92092	0.000452309	0.00585808	0.290295	11.9502	12.0105	11.3486	11.2435
16865737	NM_001012478	U2AF2	U2 small nuclear RNA auxiliary factor 2	-0.643352	10.7407	-6.91818	0.00045328	0.00586297	0.287935	10.4332	10.4049	11.0529	11.0719
16931709	NM_001253845	ADM2	adrenomedullin 2	0.714038	6.26966	6.91021	0.000456114	0.00589192	0.281073	6.67806	6.5753	5.97373	5.85156
16871158	OTTHUMT00000451297	CTD-2538C1.2	novel transcript	-0.934416	5.60456	-6.90577	0.000457702	0.00590471	0.277248	5.25236	5.02233	5.94522	6.19831
17005858	NM_003509	HIST1H2AI	histone cluster 1, H2ai	-0.925592	10.5223	-6.89338	0.000462167	0.00595319	0.266561	9.89401	10.225	11.0169	10.9533
16712435	NM_001010911	CASC10	cancer susceptibility candidate 10	-0.795938	6.90152	-6.892	0.000462664	0.00595319	0.265378	6.43498	6.57213	7.39768	7.20131
16718592	XM_005270233	AFAP1L2	actin filament associated protein 1-like 2	0.706017	9.23631	6.89026	0.000463298	0.00595358	0.263871	9.58511	9.59353	8.80702	8.95959
16829302	NM_001256182	ANKRD11	ankyrin repeat domain 11	0.641309	7.78655	6.88403	0.000465567	0.00597249	0.258492	8.11218	8.10224	7.48477	7.44703
16845856	BC045769	LOC339192	uncharacterized LOC339192	0.917785	5.46578	6.88291	0.000465978	0.00597249	0.257521	5.85892	5.99042	4.85412	5.15964
16967843	NM_001432	EREG	epiregulin	2.09284	6.64112	6.88007	0.000467016	0.00597505	0.25507	7.32048	8.0546	5.93668	5.25271
17125352	BC006438	LOC100132167	uncharacterized LOC100132167	0.747395	6.23787	6.87907	0.000467386	0.00597505	0.254198	6.54494	6.6782	5.93704	5.79131
17061592	NM_001161520	COG5	component of oligomeric golgi complex 5	0.662155	9.61997	6.87685	0.000468202	0.00597774	0.252279	9.92361	9.9785	9.32637	9.25142
17068642	NM_152419	HGSNAT	heparan-alpha-glucosaminide N-acetyltransferase	-0.679307	7.41533	-6.87473	0.000468979	0.00597994	0.250452	7.05896	7.09239	7.81289	7.69707
16777777	NM_003045	SLC7A1	solute carrier family 7 (cationic amino acid transporter, y+ system), member 1	0.635388	10.8397	6.87051	0.000470539	0.00598494	0.246796	11.1556	11.1592	10.5216	10.5224
17004657	NM_001718	BMP6	bone morphogenetic protein 6	1.2003	6.65558	6.87039	0.000470583	0.00598494	0.246694	7.40841	7.10305	6.26168	5.84919
16819678	NM_001126129	GINS3	GINS complex subunit 3 (Psf3 homolog)	-0.931661	7.43148	-6.85776	0.000475283	0.00603695	0.235751	6.97364	6.95767	8.06943	7.7252
16750792	NM_024902	DNAJC22	DnaJ (Hsp40) homolog, subfamily C, member 22	-0.747987	5.3338	-6.85525	0.000476221	0.0060411	0.233579	5.03241	4.8872	5.63866	5.77693
16971943	NM_004453	ETFDH	electron-transferring-flavoprotein dehydrogenase	-0.687759	5.61969	-6.84247	0.000481043	0.00608231	0.222487	5.31481	5.2368	6.0195	5.90764
16709865	NM_001243194	INPP5F	inositol polyphosphate-5-phosphatase F	0.654465	7.283	6.84221	0.000481144	0.00608231	0.222255	7.57007	7.6504	6.94242	6.96912
17062811	NM_001202498	UBE2H	ubiquitin-conjugating enzyme E2H	0.787486	7.55599	6.84175	0.000481316	0.00608231	0.22186	7.93473	7.96473	7.27993	7.04455
16837938	NM_000213	ITGB4	integrin, beta 4	0.670676	10.977	6.83962	0.000482128	0.00608479	0.220005	11.3434	11.2813	10.5945	10.6888
16854904	NM_024430	PSTPIP2	proline-serine-threonine phosphatase interacting protein 2	0.692669	7.43761	6.82208	0.000488851	0.00616037	0.204753	7.71703	7.85086	7.11939	7.06316
16718077	NM_014631	SH3PXD2A	SH3 and PX domains 2A	0.641894	5.40248	6.82076	0.000489364	0.00616037	0.2036	5.75341	5.69345	5.07762	5.08545
17087790	NM_001286730	SLC44A1	solute carrier family 44 (choline transporter), member 1	-0.633153	9.34675	-6.81532	0.000491472	0.0061707	0.198866	9.04544	9.0149	9.66127	9.66537
17009482	NM_018132	CENPQ	centromere protein Q	-0.702202	5.912	-6.81345	0.000492202	0.0061707	0.19723	5.56697	5.55483	6.18457	6.34164
16811391	NM_020214	PARP6	poly (ADP-ribose) polymerase family, member 6	0.854123	8.21095	6.81224	0.000492672	0.0061707	0.19618	8.61083	8.66519	7.92792	7.63985
16683723	NM_005563	STMN1	stathmin 1	-0.640787	6.01068	-6.81194	0.00049279	0.0061707	0.195915	5.71953	5.66104	6.33707	6.32507
16910143	XR_431552	LOC102723825	uncharacterized LOC102723825	-0.684757	6.5742	-6.81062	0.000493306	0.0061707	0.194762	6.18518	6.27846	6.9665	6.86666
16855491	NM_004539	NARS	asparaginyl-tRNA synthetase	0.672687	9.81258	6.80719	0.000494647	0.00617333	0.191773	10.1235	10.1743	9.53094	9.42153
16664243	NM_001142548	RAD54L	RAD54-like (S. cerevisiae)	-0.762907	7.44014	-6.80625	0.000495015	0.00617333	0.190953	7.06619	7.05118	7.71219	7.931
16858210	NM_001145056	SLC44A2	solute carrier family 44 (choline transporter), member 2	0.804878	8.78527	6.80529	0.000495391	0.00617333	0.190117	9.19539	9.18004	8.25542	8.51025
17060412	NM_001278595	MCM7	minichromosome maintenance complex component 7	-0.681031	10.4158	-6.80303	0.000496278	0.0061755	0.188146	10.0209	10.1297	10.7183	10.7944
16979050	NM_052864	TIFA	TRAF-interacting protein with forkhead-associated domain	0.667772	6.36853	6.80045	0.000497296	0.0061755	0.185889	6.6582	6.74664	5.9984	6.0709
16884918	NM_016133	INSIG2	insulin induced gene 2	0.690301	7.46104	6.7982	0.000498183	0.0061755	0.183927	7.79127	7.8211	7.18695	7.04482
16855637	NM_012327	PIGN	phosphatidylinositol glycan anchor biosynthesis, class N	-0.874822	6.28864	-6.7965	0.000498857	0.0061755	0.182437	5.87912	5.82333	6.87852	6.57358
16754394	OTTHUMT00000405848	RP11-290L1.3	novel transcript antisense to PHLDA1	0.644485	9.99727	6.79418	0.000499775	0.0061755	0.180411	10.3529	10.2861	9.68995	9.6601
17055354	NM_004956	ETV1	ets variant 1	-1.01072	5.87871	-6.79366	0.000499982	0.0061755	0.179956	5.18854	5.55816	6.30312	6.46501
16668333	NM_000850	GSTM4	glutathione S-transferase mu 4	0.744026	7.76627	6.79298	0.000500252	0.0061755	0.17936	8.04017	8.2364	7.36784	7.42068
16808876	NM_001194998	CEP152	centrosomal protein 152kDa	-0.642009	6.51811	-6.79177	0.00050073	0.0061755	0.178308	6.16808	6.22614	6.82157	6.85667
17090296	NM_000050	ASS1	argininosuccinate synthase 1	0.643321	10.306	6.79062	0.000501189	0.0061755	0.177299	10.6442	10.6111	10.0159	9.95278
16739552	NM_001081491	NXF1	nuclear RNA export factor 1	-0.655348	8.30758	-6.78494	0.000503451	0.00618478	0.172339	7.97338	7.98642	8.68309	8.58741
16877795	NM_014971	EFR3B	EFR3 homolog B (S. cerevisiae)	-0.938621	6.7248	-6.78492	0.000503459	0.00618478	0.172321	6.08948	6.4215	7.25868	7.12954
16902015	ENST00000429538	PAX8	paired box 8	0.694262	6.1256	6.78358	0.000503996	0.00618478	0.171148	6.47134	6.47413	5.85437	5.70257
16687418	NM_001168551	NDC1	NDC1 transmembrane nucleoporin	-0.642783	9.3279	-6.78246	0.000504446	0.00618478	0.170163	8.97071	9.0423	9.64647	9.6521
16920939	NM_005560	LAMA5	laminin, alpha 5	0.639683	9.09795	6.77707	0.000506609	0.00619516	0.165449	9.4411	9.39448	8.7551	8.80111
16695572	NM_012394	PFDN2	prefoldin subunit 2	0.695065	9.88818	6.77325	0.000508153	0.00619516	0.162098	10.3126	10.1589	9.53544	9.54584
16919915	NM_001281773	ZMYND8	zinc finger, MYND-type containing 8	-0.638299	8.64501	-6.77241	0.000508491	0.00619516	0.161364	8.30417	8.34756	8.98704	8.94129
16842103	NM_001281786	SHMT1	serine hydroxymethyltransferase 1 (soluble)	-0.661414	7.65017	-6.77226	0.000508553	0.00619516	0.16123	7.37075	7.26818	7.96277	7.99899
16754808	NM_152588	TMTC2	transmembrane and tetratricopeptide repeat containing 2	0.780266	5.33963	6.76921	0.000509786	0.00619516	0.158563	5.79919	5.66034	4.85269	5.0463
16828074	NM_001030007	AP1G1	adaptor-related protein complex 1, gamma 1 subunit	-0.647628	9.89887	-6.76791	0.000510315	0.00619516	0.157419	9.53579	9.61434	10.2392	10.2062
16899711	NM_001031738	TMEM150A	transmembrane protein 150A	0.630623	7.18878	6.7661	0.000511048	0.00619516	0.155838	7.52422	7.48398	6.87257	6.87438
16765945	NM_001242826	RNF41	ring finger protein 41, E3 ubiquitin protein ligase	0.700542	8.65624	6.7659	0.00051113	0.00619516	0.155662	9.02725	8.98578	8.38389	8.22805
16994618	NM_012334	MYO10	myosin X	0.633003	9.97855	6.7647	0.000511619	0.00619516	0.154608	10.319	10.2711	9.6685	9.65559
16695960	NM_199351	ILDR2	immunoglobulin-like domain containing receptor 2	-0.829436	5.75846	-6.76335	0.00051217	0.00619516	0.153422	5.47586	5.21161	6.21777	6.12858
16887840	ENST00000496441	CDCA7	cell division cycle associated 7	-0.686119	7.34277	-6.76065	0.000513274	0.00619516	0.151051	6.92745	7.07197	7.68157	7.69009
16935537	NM_000262	NAGA	N-acetylgalactosaminidase, alpha-	-0.643104	7.65072	-6.76048	0.00051334	0.00619516	0.150908	7.35954	7.2988	7.94842	7.99613
17123104	ENST00000454268	LOC101929374	uncharacterized LOC101929374	0.714231	7.82572	6.76024	0.000513442	0.00619516	0.15069	8.14919	8.21648	7.3868	7.55042
16677473	NM_016121	KCTD3	potassium channel tetramerization domain containing 3	-0.633599	8.03543	-6.75119	0.000517156	0.00621001	0.142748	7.69168	7.74558	8.34576	8.35869
16732891	NM_001126181	NRGN	neurogranin (protein kinase C substrate, RC3)	-1.45853	6.17864	-6.75118	0.000517161	0.00621001	0.142737	5.112	5.78675	6.92871	6.8871
17095775	NM_002161	IARS	isoleucyl-tRNA synthetase	0.66012	10.6431	6.7506	0.0005174	0.00621001	0.142228	10.9194	11.0269	10.3247	10.3013
16914733	NR_003604	ZFAS1	ZNFX1 antisense RNA 1	0.646672	10.0791	6.7502	0.000517564	0.00621001	0.141879	10.4143	10.3907	9.71413	9.79749
16799637	NM_001164269	RAD51	RAD51 recombinase	-0.665143	6.21531	-6.74959	0.000517815	0.00621001	0.141345	5.84375	5.92174	6.50367	6.5921
16907843	NM_001136574	LANCL1	LanC lantibiotic synthetase component C-like 1 (bacterial)	-0.690331	7.79739	-6.73214	0.000525082	0.00628522	0.12599	7.4001	7.50434	8.19883	8.08627
16815415	NM_005741	ZNF263	zinc finger protein 263	0.653197	6.67029	6.73148	0.000525359	0.00628522	0.125408	6.94656	7.04721	6.35134	6.33604
16858156	NM_003259	ICAM5	intercellular adhesion molecule 5, telencephalin	0.65598	6.03035	6.72668	0.000527375	0.00630003	0.121186	6.40654	6.31015	5.67891	5.72581
16970958	NM_001292002	ZNF330	zinc finger protein 330	0.633074	7.28532	6.7244	0.000528337	0.00630003	0.119178	7.62963	7.57407	6.95601	6.98155
16985614	NM_022909	CENPH	centromere protein H	-0.814405	6.12697	-6.724	0.000528509	0.00630003	0.118821	5.58741	5.85212	6.50555	6.56279
16903491	NM_001254738	RND3	Rho family GTPase 3	0.960794	6.48578	6.71708	0.000531441	0.00632735	0.112723	7.04547	6.88688	5.83391	6.17685
16840885	ENST00000526920	TMEM107	transmembrane protein 107	-0.85696	6.04069	-6.71342	0.000533002	0.0063383	0.10949	5.76443	5.45999	6.46337	6.47497
16745718	NM_019055	ROBO4	roundabout, axon guidance receptor, homolog 4 (Drosophila)	0.744395	5.9304	6.70444	0.00053685	0.00637638	0.101563	6.27402	6.33117	5.66067	5.45573
16837729	NM_024844	NUP85	nucleoporin 85kDa	-0.621338	7.4931	-6.6992	0.000539112	0.00639557	0.0969272	7.19439	7.17048	7.80076	7.80678
16840769	NR_024349	LOC284023	uncharacterized LOC284023	-0.741218	6.8308	-6.68884	0.000543615	0.00644125	0.08776	6.40733	6.51305	7.10987	7.29295
16711413	OTTHUMT00000046559	RP13-463N16.6	putative novel transcript	-1.30079	6.7817	-6.68275	0.000546279	0.00646263	0.0823708	5.84974	6.41288	7.52504	7.33915
16718922	ENST00000494433	PRDX3	peroxiredoxin 3	-0.659495	9.75435	-6.68085	0.000547117	0.00646263	0.0806821	9.37046	9.47874	10.1095	10.0587
16815128	NM_001199107	TBC1D24	TBC1 domain family, member 24	0.726228	7.15386	6.68025	0.000547381	0.00646263	0.0801501	7.4287	7.60524	6.83545	6.74603
17058617	NM_001278791	RFC2	replication factor C (activator 1) 2, 40kDa	-0.63098	8.80368	-6.67834	0.000548219	0.0064648	0.0784636	8.45607	8.52032	9.10955	9.1288
16832147	NM_000382	ALDH3A2	aldehyde dehydrogenase 3 family, member A2	-0.836393	6.67854	-6.67553	0.000549462	0.00647174	0.0759665	6.114	6.40669	7.09588	7.0976
16962333	NM_001007225	IGF2BP2	insulin-like growth factor 2 mRNA binding protein 2	0.657454	10.0321	6.6737	0.00055027	0.00647354	0.0743472	10.3869	10.3348	9.65069	9.75611
17119668	NR_029911	MIR196B	microRNA 196b	0.661893	8.6822	6.66953	0.000552119	0.00648757	0.0706491	8.95324	9.07306	8.33397	8.36855
17114334	NR_030228	MIR503	microRNA 503	0.93853	7.22703	6.64939	0.000561156	0.00658319	0.0527505	7.7286	7.66398	6.57601	6.93951
16979060	NM_018392	ZGRF1	zinc finger, GRF-type containing 1	-1.1156	5.9596	-6.64844	0.00056159	0.00658319	0.0518998	5.63484	5.16876	6.5841	6.45071
17121848	NM_173628	DNAH17	dynein, axonemal, heavy chain 17	0.706376	5.32289	6.64505	0.000563125	0.00659125	0.0488893	5.76682	5.58533	4.97139	4.96801
16846993	NM_001078166	SRSF1	serine/arginine-rich splicing factor 1	-0.620113	10.7512	-6.64398	0.000563611	0.00659125	0.0479375	10.4329	10.4494	11.041	11.0816
16819689	ENST00000421602	NDRG4	NDRG family member 4	-0.648046	5.95721	-6.63773	0.000566466	0.00661208	0.0423668	5.58219	5.68418	6.26287	6.2996
16805719	NM_024652	LRRK1	leucine-rich repeat kinase 1	0.624055	7.82216	6.63715	0.00056673	0.00661208	0.0418529	8.16223	8.10614	7.51907	7.50118
16766499	NM_014925	R3HDM2	R3H domain containing 2	0.626117	7.72792	6.62701	0.000571399	0.00665782	0.0328062	8.00835	8.0736	7.42253	7.40718
17044800	NM_002047	GARS	glycyl-tRNA synthetase	0.691929	10.45	6.62571	0.000571999	0.00665782	0.0316508	10.7128	10.8791	10.1157	10.0923
16753228	NM_033276	XRCC6BP1	XRCC6 binding protein 1	-0.951104	6.70128	-6.62185	0.000573788	0.00666244	0.0282067	6.40234	6.04911	7.24758	7.10608
16976117	NM_001292045	NMU	neuromedin U	-0.742953	6.91989	-6.62168	0.000573868	0.00666244	0.0280533	6.43942	6.65741	7.27652	7.30621
16999776	NM_002198	IRF1	interferon regulatory factor 1	0.939321	6.63426	6.6205	0.000574418	0.00666244	0.026997	7.11879	7.08906	5.97891	6.35029
17114038	NM_001127197	ELF4	E74-like factor 4 (ets domain transcription factor)	0.641068	8.72867	6.61759	0.000575771	0.0066703	0.0244026	9.0557	9.04271	8.3586	8.45767
16670387	NM_001005464	HIST2H3A	histone cluster 2, H3a	-0.862119	9.91447	-6.61127	0.000578727	0.0066967	0.0187549	9.5046	9.46222	10.1878	10.5033
16919567	NM_002999	SDC4	syndecan 4	0.653197	10.6393	6.60977	0.000579431	0.006697	0.0174147	10.9403	10.9916	10.2581	10.3673
16842517	NM_000625	NOS2	nitric oxide synthase 2, inducible	-0.924105	5.70074	-6.60578	0.000581312	0.00670997	0.0138413	5.2361	5.24128	5.98109	6.3445
17114348	NM_001166599	FAM122B	family with sequence similarity 122B	-0.61382	9.1536	-6.60451	0.000581911	0.00670997	0.0127047	8.84188	8.8515	9.47586	9.44517
17048742	NM_002523	NPTX2	neuronal pentraxin II	-0.878465	6.9942	-6.59474	0.000586542	0.00675549	0.0039634	6.39331	6.71662	7.39576	7.4711
17016043	NM_001080480	MBOAT1	membrane bound O-acyltransferase domain containing 1	-0.611808	7.91433	-6.58914	0.000589217	0.00677715	-0.00105529	7.61396	7.60288	8.20687	8.23359
16689706	NM_001261408	BCAR3	breast cancer anti-estrogen resistance 3	0.856462	6.56891	6.58794	0.000589794	0.00677715	-0.00213511	7.1539	6.84038	6.11946	6.16189
16723569	NM_001206615	EHF	ets homologous factor	0.645931	7.45892	6.57953	0.000593844	0.00681575	-0.00968089	7.83882	7.72494	7.1322	7.1397
16669389	NM_006623	PHGDH	phosphoglycerate dehydrogenase	0.636825	8.65218	6.57598	0.00059556	0.00682752	-0.0128644	8.92082	9.02036	8.33333	8.3342
16753465	NM_007235	XPOT	exportin, tRNA	0.632682	10.1977	6.57303	0.000596991	0.006836	-0.015511	10.4733	10.5547	9.90319	9.85944
17043278	OTTHUMT00000324095	AC092171.4	novel transcript	-0.616351	5.34243	-6.5685	0.000599201	0.0068499	-0.0195876	5.01312	5.05539	5.66829	5.63292
17000305	NM_016603	FAM13B	family with sequence similarity 13, member B	-0.68256	7.31947	-6.5677	0.000599592	0.0068499	-0.0203059	7.01231	6.94407	7.73543	7.58607
17051860	NM_001293085	BPGM	2,3-bisphosphoglycerate mutase	-0.652364	6.23323	-6.56462	0.000601097	0.00685825	-0.0230716	5.84741	5.96669	6.57969	6.53914
16779701	NM_004392	DACH1	dachshund family transcription factor 1	-1.0818	5.17098	-6.56254	0.000602118	0.00685825	-0.024943	4.3942	4.86595	5.72504	5.69872
16741864	NM_014824	FCHSD2	FCH and double SH3 domains 2	-0.63928	7.97541	-6.56085	0.00060295	0.00685825	-0.0264662	7.60728	7.70425	8.27326	8.31684
16719217	NM_001270764	CHST15	carbohydrate (N-acetylgalactosamine 4-sulfate 6-O) sulfotransferase 15	0.607925	7.8763	6.56055	0.000603098	0.00685825	-0.0267373	8.17357	8.18697	7.56458	7.5801
16930299	NM_001675	ATF4	activating transcription factor 4	0.620454	8.62823	6.5533	0.000606676	0.0068852	-0.0332618	8.91006	8.96686	8.33873	8.29728
16840846	NM_002616	PER1	period circadian clock 1	0.653452	7.39389	6.55292	0.000606862	0.0068852	-0.0336	7.76214	7.67909	7.11665	7.01767
16737216	NM_012175	FBXO3	F-box protein 3	-0.961197	5.96995	-6.5487	0.000608955	0.00690064	-0.0373981	5.29928	5.67943	6.50354	6.39756
16829139	NM_002461	MVD	mevalonate (diphospho) decarboxylase	0.773892	7.85485	6.54737	0.000609619	0.00690064	-0.0386006	8.30731	8.17629	7.57723	7.35859
16785696	NM_001172	ARG2	arginase 2	0.630918	8.7874	6.53891	0.000613851	0.00694059	-0.0462316	9.05781	9.14791	8.48752	8.45637
16746341	NR_024344	MIR4697HG	MIR4697 host gene (non-protein coding)	0.694096	6.99603	6.52885	0.000618921	0.00698735	-0.0553064	7.4047	7.28145	6.71567	6.58229
16815509	NM_138440	VASN	vasorin	0.627635	6.50361	6.52791	0.000619401	0.00698735	-0.0561603	6.83084	6.80402	6.14625	6.23333
17043179	AB007875	AP5Z1	adaptor-related protein complex 5, zeta 1 subunit	0.612374	6.93679	6.52641	0.000620162	0.00698796	-0.0575161	7.23781	7.24815	6.65763	6.60358
16852497	NM_015285	WDR7	WD repeat domain 7	-0.643249	6.68017	-6.52361	0.000621587	0.00699215	-0.0600471	6.33058	6.38652	6.94958	7.05402
16726439	NM_012094	PRDX5	peroxiredoxin 5	0.617198	8.65188	6.52243	0.000622184	0.00699215	-0.0611067	8.96373	8.95722	8.30869	8.37787
16667206	NM_206886	CCDC18	coiled-coil domain containing 18	-0.678979	6.71811	-6.52151	0.000622657	0.00699215	-0.0619448	6.29757	6.45967	7.0406	7.0746
16863344	NM_001163377	QPCTL	glutaminyl-peptide cyclotransferase-like	0.680161	8.08008	6.51826	0.000624315	0.00700281	-0.0648784	8.36088	8.47943	7.68092	7.79907
16836021	NM_003786	ABCC3	ATP-binding cassette, sub-family C (CFTR/MRP), member 3	0.63064	9.24063	6.51675	0.00062509	0.00700356	-0.0662483	9.56376	9.54815	8.87656	8.97407
17013554	NM_005715	UST	uronyl-2-sulfotransferase	0.724485	6.16625	6.51216	0.000627449	0.00702202	-0.0704031	6.45759	6.59939	5.88425	5.72377
17120350	ENST00000422642	SVILP1	supervillin pseudogene 1	0.755655	7.90586	6.51002	0.000628547	0.00702636	-0.0723333	8.38654	8.18084	7.46343	7.59264
16772004	XM_005253570	RILPL1	Rab interacting lysosomal protein-like 1	0.773383	6.26422	6.50822	0.000629476	0.0070288	-0.0739631	6.5233	6.77853	5.89767	5.85739
16971573	NM_001253861	MND1	meiotic nuclear divisions 1 homolog (S. cerevisiae)	-0.681856	5.72522	-6.49299	0.000637406	0.00710251	-0.0877751	5.38539	5.38319	5.98	6.15229
17110382	NR_110388	LINC01186	long intergenic non-protein coding RNA 1186	-0.646325	5.95974	-6.49278	0.000637515	0.00710251	-0.0879646	5.69014	5.58301	6.24826	6.31754
16837270	NM_002266	KPNA2	karyopherin alpha 2 (RAG cohort 1, importin alpha 1)	-0.60101	11.8544	-6.48649	0.000640819	0.00713128	-0.0936684	11.5601	11.5476	12.1627	12.147
16910501	NM_012145	DTYMK	deoxythymidylate kinase (thymidylate kinase)	-0.608881	7.63694	-6.48049	0.000643993	0.00715853	-0.09912	7.32192	7.34309	7.91463	7.96814
16699392	NM_004446	EPRS	glutamyl-prolyl-tRNA synthetase	0.633836	10.0348	6.47714	0.000645772	0.00716426	-0.102165	10.3843	10.3192	9.76278	9.67306
16800680	NM_001271213	SQRDL	sulfide quinone reductase-like (yeast)	-0.647614	6.11321	-6.47679	0.000645958	0.00716426	-0.102483	5.7824	5.79641	6.37155	6.50249
16860418	NM_001238	CCNE1	cyclin E1	-0.609395	6.95431	-6.47109	0.000649004	0.00718998	-0.107674	6.62328	6.67594	7.243	7.27502
16879118	NM_174931	GPATCH11	G patch domain containing 11	-0.712572	7.01347	-6.46795	0.000650687	0.00720054	-0.110531	6.66975	6.64461	7.47265	7.26685
17119358	NR_002588	SNORA4	small nucleolar RNA, H/ACA box 4	-0.901279	7.32408	-6.46201	0.00065388	0.00722727	-0.115934	6.77862	6.96826	7.62083	7.92861
16675924	XM_005244942	ELF3	E74-like factor 3 (ets domain transcription factor, epithelial-specific )	0.706587	6.49652	6.46074	0.000654564	0.00722727	-0.117088	6.93937	6.76025	6.09636	6.19009
16905216	NM_001033045	GPR155	G protein-coupled receptor 155	-1.02182	6.61673	-6.45819	0.000655946	0.00723444	-0.119415	6.09539	6.11624	7.34965	6.90562
16898788	NM_001099691	TGFA	transforming growth factor, alpha	0.640118	7.82495	6.44663	0.000662243	0.00729575	-0.12996	8.09879	8.19123	7.54712	7.46266
17005077	NM_013262	MYLIP	myosin regulatory light chain interacting protein	-0.698884	6.59963	-6.43975	0.000666024	0.00732468	-0.136244	6.2154	6.28499	7.04105	6.8571
16867476	NM_014649	SAFB2	scaffold attachment factor B2	-0.616279	7.9654	-6.43915	0.000666352	0.00732468	-0.136787	7.61565	7.69887	8.28316	8.26392
16830189	NM_001105520	C17orf100	chromosome 17 open reading frame 100	0.617661	7.07294	6.4366	0.000667759	0.007332	-0.139115	7.37217	7.39137	6.80743	6.72079
17104363	NM_004429	EFNB1	ephrin-B1	0.61425	11.3402	6.43502	0.000668633	0.00733344	-0.140558	11.6094	11.6852	11.0176	11.0486
16987986	ENST00000413221	EPB41L4A-AS1	EPB41L4A antisense RNA 1	0.613787	7.27984	6.43316	0.000669667	0.00733664	-0.142263	7.5926	7.58087	7.01318	6.93272
16847996	NM_014877	HELZ	helicase with zinc finger	-0.6288	8.95185	-6.43113	0.000670793	0.00733789	-0.144119	8.60194	8.67297	9.22429	9.30822
16819883	NM_020786	PDP2	pyruvate dehyrogenase phosphatase catalytic subunit 2	0.714106	6.65331	6.42947	0.000671717	0.00733789	-0.145638	7.08523	6.93551	6.22051	6.37201
17045738	uc003tlx.3	PPIA	peptidylprolyl isomerase A (cyclophilin A)	-0.824335	7.93245	-6.42894	0.000672009	0.00733789	-0.146118	7.37259	7.66797	8.30181	8.38741
16989332	NM_014829	DDX46	DEAD (Asp-Glu-Ala-Asp) box polypeptide 46	-0.653191	8.51313	-6.42603	0.000673635	0.00734559	-0.148784	8.16635	8.20673	8.76952	8.90994
17123106	NM_001013836	MAD1L1	MAD1 mitotic arrest deficient-like 1 (yeast)	0.65817	8.38691	6.42502	0.000674201	0.00734559	-0.149712	8.71287	8.71912	7.98159	8.13405
16943433	NR_002941	PDCL3P4	phosducin-like 3 pseudogene 4	-0.726766	7.21253	-6.42261	0.000675549	0.00734976	-0.151916	6.75019	6.9481	7.63026	7.52156
16751709	NM_012291	ESPL1	extra spindle pole bodies homolog 1 (S. cerevisiae)	-0.712475	8.00781	-6.42168	0.00067607	0.00734976	-0.152768	7.67513	7.62801	8.26056	8.46752
16995890	NM_001098272	HMGCS1	3-hydroxy-3-methylglutaryl-CoA synthase 1 (soluble)	0.69053	6.97683	6.41774	0.000678281	0.0073647	-0.156372	7.40052	7.24367	6.68558	6.57756
16794158	NM_001244701	ZFP36L1	ZFP36 ring finger protein-like 1	0.61192	8.21429	6.41578	0.000679386	0.0073647	-0.158169	8.48086	8.55963	7.89918	7.91747
16844872	NM_002230	JUP	junction plakoglobin	0.604606	10.5618	6.41526	0.000679681	0.0073647	-0.158648	10.8843	10.8438	10.2353	10.2836
16807071	NM_014106	ZNF770	zinc finger protein 770	0.798048	8.35491	6.41239	0.000681298	0.00737414	-0.161271	8.61421	8.89366	7.9915	7.92026
16711731	NM_001080491	USP6NL	USP6 N-terminal like	0.716686	8.08163	6.39687	0.000690144	0.00746171	-0.175512	8.33086	8.5491	7.73241	7.71417
16880442	NM_001129993	KIAA1841	KIAA1841	-0.668376	5.58662	-6.39384	0.000691886	0.00746561	-0.178295	5.21919	5.28567	5.99837	5.84325
17025619	NM_001006932	RPS6KA2	ribosomal protein S6 kinase, 90kDa, polypeptide 2	0.938354	4.97831	6.39362	0.000692016	0.00746561	-0.178502	5.25026	5.64472	4.51441	4.50386
16878994	NM_001139488	RASGRP3	RAS guanyl releasing protein 3 (calcium and DAG-regulated)	-1.14354	5.06369	-6.39088	0.000693593	0.00747446	-0.181014	4.22728	4.75657	5.61842	5.65251
16857913	NM_001297418	HNRNPM	heterogeneous nuclear ribonucleoprotein M	-0.61215	10.5406	-6.38773	0.000695415	0.00748594	-0.183911	10.1917	10.2773	10.8385	10.8547
16990920	NM_152407	GRPEL2	GrpE-like 2, mitochondrial (E. coli)	0.603001	7.97975	6.37967	0.000700104	0.00752793	-0.191331	8.26763	8.29487	7.70924	7.64726
16687847	NM_002353	TACSTD2	tumor-associated calcium signal transducer 2	0.596525	9.03436	6.37841	0.000700839	0.00752793	-0.192489	9.35561	9.30963	8.72861	8.74358
16768309	NM_001199777	POC1B	POC1 centriolar protein B	0.617146	7.63962	6.37293	0.000704049	0.00755215	-0.197534	7.89843	7.99796	7.33094	7.33116
16770915	ENST00000441406	WSB2	WD repeat and SOCS box containing 2	-0.647855	9.7512	-6.37195	0.000704622	0.00755215	-0.198433	9.49847	9.35608	10.092	10.0583
16913263	NM_001258329	EPB41L1	erythrocyte membrane protein band 4.1-like 1	0.653105	8.64288	6.36996	0.000705796	0.00755653	-0.200271	9.02525	8.91362	8.36888	8.26379
16996722	NM_001267038	CENPK	centromere protein K	-0.870856	6.03921	-6.3607	0.000711273	0.00760693	-0.208806	5.46682	5.74074	6.36605	6.58323
16698023	NM_014176	UBE2T	ubiquitin-conjugating enzyme E2T (putative)	-0.81917	8.16504	-6.35768	0.000713076	0.0076105	-0.2116	7.85192	7.659	8.69638	8.45288
16676619	NM_182663	RASSF5	Ras association (RalGDS/AF-6) domain family member 5	-0.634704	6.20243	-6.35756	0.000713147	0.0076105	-0.21171	5.82691	5.94323	6.5491	6.49046
16849528	NM_025090	USP36	ubiquitin specific peptidase 36	0.592636	9.76922	6.34672	0.000719641	0.0076699	-0.221719	10.0819	10.0492	9.45758	9.48822
17024187	NM_022121	PERP	PERP, TP53 apoptosis effector	0.669834	8.03388	6.34526	0.000720521	0.0076699	-0.223069	8.31369	8.42391	7.76775	7.63017
16706875	NM_004329	BMPR1A	bone morphogenetic protein receptor, type IA	-0.609628	8.4629	-6.3444	0.000721042	0.0076699	-0.223866	8.16676	8.14942	8.81207	8.72336
17000439	NM_001287582	CDC25C	cell division cycle 25C	-0.651752	6.89635	-6.33411	0.00072728	0.00771471	-0.23338	6.63407	6.50689	7.2676	7.17686
17075221	NM_021020	LZTS1	leucine zipper, putative tumor suppressor 1	-0.636193	6.48236	-6.33387	0.000727432	0.00771471	-0.233609	6.2109	6.11762	6.84977	6.75114
16951756	NM_001258379	SLC4A7	solute carrier family 4, sodium bicarbonate cotransporter, member 7	0.586616	7.34193	6.33359	0.000727597	0.00771471	-0.23386	7.64402	7.62646	7.05051	7.04674
17063981	NM_001206938	FAM115A	family with sequence similarity 115, member A	-0.697619	7.98415	-6.33154	0.000728853	0.00771974	-0.235764	7.53406	7.73662	8.35526	8.31066
16942991	NM_001174150	ARL13B	ADP-ribosylation factor-like 13B	-0.588696	7.69241	-6.32863	0.000730629	0.00773028	-0.238453	7.40425	7.39187	7.97046	8.00306
17044568	NM_006024	TAX1BP1	Tax1 (human T-cell leukemia virus type I) binding protein 1	0.631121	10.2083	6.32697	0.00073165	0.00773279	-0.239994	10.5069	10.5407	9.95521	9.83022
16791898	NM_001243645	CFL2	cofilin 2 (muscle)	-0.785352	6.40743	-6.32366	0.000733688	0.00774071	-0.243066	5.89776	6.13175	6.71699	6.88322
16869814	NM_058243	BRD4	bromodomain containing 4	0.640043	9.92589	6.32321	0.000733965	0.00774071	-0.243484	10.1811	10.3107	9.63551	9.57624
16796807	OTTHUMT00000414792	RP11-1029J19.4	novel transcript	0.635831	5.72544	6.32109	0.00073527	0.0077462	-0.245445	6.10503	5.98168	5.43738	5.37767
17125788	NM_003520	HIST1H2BN	histone cluster 1, H2bn	-0.86596	10.0868	-6.31789	0.000737249	0.00775134	-0.248413	9.48656	9.82099	10.5718	10.4676
16992918	NM_133369	UNC5A	unc-5 homolog A (C. elegans)	0.62419	6.19799	6.31749	0.000737494	0.00775134	-0.248781	6.47118	6.54898	5.93188	5.8399
16762237	NM_014802	C2CD5	C2 calcium-dependent domain containing 5	-0.680066	8.04424	-6.31504	0.000739018	0.00775134	-0.251059	7.69185	7.71657	8.47901	8.28954
17005368	NM_001080	ALDH5A1	aldehyde dehydrogenase 5 family, member A1	-0.616123	6.71454	-6.31232	0.000740709	0.00775134	-0.253585	6.42445	6.38851	6.9716	7.0736
16862324	NM_025194	ITPKC	inositol-trisphosphate 3-kinase C	0.586571	7.38247	6.31218	0.000740796	0.00775134	-0.253713	7.68734	7.66417	7.07835	7.10002
16940724	NM_003458	BSN	bassoon presynaptic cytomatrix protein	0.638736	5.33538	6.31069	0.000741721	0.00775134	-0.255092	5.58369	5.72581	5.01109	5.02094
16699021	NM_001199809	INTS7	integrator complex subunit 7	-0.673739	7.60865	-6.30973	0.000742319	0.00775134	-0.255982	7.18266	7.3609	7.96999	7.92105
17118283	AK126634	LOC100131372	uncharacterized LOC100131372	-0.662733	5.52503	-6.30927	0.000742611	0.00775134	-0.256416	5.18111	5.20622	5.77107	5.94173
16901827	OTTHUMT00000332148	AC017002.2	novel transcript	-0.872165	8.27507	-6.30894	0.000742817	0.00775134	-0.256723	7.68398	7.994	8.62387	8.79845
16868743	NM_012289	KEAP1	kelch-like ECH-associated protein 1	-0.595173	8.89172	-6.30333	0.00074633	0.00777978	-0.261934	8.59207	8.5962	9.15634	9.22227
16732315	NM_032015	RNF26	ring finger protein 26	-0.693875	8.96931	-6.30008	0.000748376	0.00779289	-0.264957	8.62912	8.61563	9.2129	9.41959
16812617	NM_001278511	AP3B2	adaptor-related protein complex 3, beta 2 subunit	0.781034	6.52132	6.2983	0.000749495	0.00779633	-0.266607	6.79819	7.02548	6.04394	6.21766
16998700	NM_001163315	FBXL17	F-box and leucine-rich repeat protein 17	-0.660776	7.48909	-6.29429	0.000752033	0.0078145	-0.27034	7.11811	7.19929	7.89533	7.74363
16867349	NM_032108	SEMA6B	sema domain, transmembrane domain (TM), and cytoplasmic domain, (semaphorin) 6B	-0.681875	7.8561	-6.29289	0.000752918	0.00781548	-0.27164	7.56204	7.46828	8.11123	8.28283
16731132	NM_033425	DIXDC1	DIX domain containing 1	-0.641167	5.74983	-6.29057	0.000754393	0.00782257	-0.273801	5.3564	5.5021	6.05629	6.08455
17094002	OTTHUMT00000052460	RP11-397D12.4	putative novel transcript	0.735172	6.80105	6.28638	0.000757061	0.00783331	-0.2777	7.04727	7.29	6.45857	6.40835
17024285	NM_001168388	CITED2	Cbp/p300-interacting transactivator, with Glu/Asp-rich carboxy-terminal domain, 2	0.584578	6.78015	6.28555	0.000757591	0.00783331	-0.278474	7.05559	7.0893	6.49104	6.48469
16722299	NM_000922	PDE3B	phosphodiesterase 3B, cGMP-inhibited	-0.861733	5.60366	-6.28521	0.000757807	0.00783331	-0.278788	5.15856	5.18702	6.20918	5.85987
16799577	NM_130468	CHST14	carbohydrate (N-acetylgalactosamine 4-0) sulfotransferase 14	-0.670511	8.11952	-6.28198	0.000759874	0.00783906	-0.281796	7.69229	7.87625	8.4621	8.44746
16970563	NM_001190799	PLK4	polo-like kinase 4	-0.7897	6.23578	-6.28187	0.000759949	0.00783906	-0.281906	5.71929	5.96257	6.71392	6.54734
16703563	ENST00000497699	BAMBI	BMP and activin membrane-bound inhibitor	0.581955	10.6803	6.27668	0.00076328	0.00786521	-0.286737	10.9704	10.9722	10.4009	10.3778
16865992	NM_006635	ZNF460	zinc finger protein 460	0.58057	8.45551	6.27492	0.00076442	0.00786875	-0.288385	8.74198	8.74961	8.16871	8.16174
16911040	NM_004358	CDC25B	cell division cycle 25B	0.601573	9.68542	6.26978	0.000767747	0.00789477	-0.293182	9.95101	10.0214	9.35774	9.41152
16688864	NM_024686	TTLL7	tubulin tyrosine ligase-like family, member 7	-0.63461	5.66951	-6.25638	0.000776497	0.00796405	-0.3057	5.33956	5.36485	5.91577	6.05786
16836528	NM_001005404	YPEL2	yippee-like 2 (Drosophila)	1.04945	5.99857	6.25621	0.000776605	0.00796405	-0.305853	6.53578	6.51081	5.71581	5.23188
16734420	NM_005170	ASCL2	achaete-scute family bHLH transcription factor 2	-0.651002	7.28984	-6.25576	0.000776902	0.00796405	-0.306276	7.02491	6.90377	7.67154	7.55914
16778355	NM_005780	LHFP	lipoma HMGIC fusion partner	0.655932	7.74691	6.25406	0.00077802	0.00796724	-0.307864	8.12264	8.02711	7.34783	7.49006
16672847	NM_001286373	TOMM40L	translocase of outer mitochondrial membrane 40 homolog (yeast)-like	-0.613508	5.53075	-6.25177	0.00077953	0.00797445	-0.310007	5.27444	5.17355	5.86374	5.81126
16843049	NM_001282129	SSH2	slingshot protein phosphatase 2	-0.647363	7.61627	-6.2485	0.00078169	0.00797484	-0.313063	7.22633	7.35884	7.98632	7.89358
16962620	NR_036497	LPP-AS2	LPP antisense RNA 2	-0.739819	5.89797	-6.24681	0.000782813	0.00797484	-0.314649	5.64801	5.4081	6.22295	6.31281
17078633	NM_001170796	ZFAND1	zinc finger, AN1-type domain 1	0.656022	7.74975	6.24564	0.000783591	0.00797484	-0.315746	7.99227	8.16326	7.43302	7.41046
16763882	ENST00000535055	ASB8	ankyrin repeat and SOCS box containing 8	-0.634262	5.48261	-6.24551	0.000783674	0.00797484	-0.315863	5.1245	5.20645	5.85975	5.73973
17085975	NM_012383	OSTF1	osteoclast stimulating factor 1	-0.746591	8.58989	-6.24433	0.000784457	0.00797484	-0.316966	8.19208	8.24112	9.09208	8.8343
16933795	NM_001204240	TBC1D10A	TBC1 domain family, member 10A	0.72931	6.17531	6.24401	0.000784676	0.00797484	-0.317274	6.66045	6.41948	5.83788	5.78343
17064939	NM_001281932	NCAPG2	non-SMC condensin II complex, subunit G2	-0.630552	9.0752	-6.24319	0.000785217	0.00797484	-0.318036	8.72758	8.79226	9.4529	9.32805
16850344	NM_014798	PLEKHM1	pleckstrin homology domain containing, family M (with RUN domain) member 1	0.589357	9.50542	6.23844	0.000788389	0.00799883	-0.322489	9.78897	9.81122	9.17919	9.24229
16884523	NM_005415	SLC20A1	solute carrier family 20 (phosphate transporter), member 1	0.584856	10.1176	6.23673	0.00078953	0.00800177	-0.324088	10.3834	10.4365	9.82983	9.82044
16722405	NR_045002	OR7E14P	olfactory receptor, family 7, subfamily E, member 14 pseudogene	-0.79423	6.78654	-6.23506	0.000790654	0.00800177	-0.325659	6.37725	6.40159	7.33482	7.03248
16769770	NM_001206609	SELPLG	selectin P ligand	-0.609184	5.98581	-6.23436	0.000791119	0.00800177	-0.326308	5.69185	5.67058	6.23679	6.344
16950440	NM_000916	OXTR	oxytocin receptor	0.813401	6.36942	6.23317	0.000791917	0.00800177	-0.327423	6.86654	6.68569	5.83145	6.09398
17057413	ENST00000577700	SNHG15	small nucleolar RNA host gene 15 (non-protein coding)	0.645367	6.87694	6.23051	0.000793709	0.00800751	-0.32992	7.21746	7.18179	6.63305	6.47546
17001946	ENST00000521264	ATOX1	antioxidant 1 copper chaperone	0.630437	6.8723	6.22816	0.000795298	0.00800751	-0.332128	7.15199	7.22304	6.4953	6.61886
16995925	ENST00000500337	C5orf28	chromosome 5 open reading frame 28	0.788908	6.04791	6.2274	0.000795813	0.00800751	-0.332844	6.3629	6.52183	5.78056	5.52635
16953279	NM_001789	CDC25A	cell division cycle 25A	-0.614598	8.0554	-6.22543	0.00079714	0.00800751	-0.334685	7.68999	7.8062	8.37701	8.34839
16802106	NM_016395	PTPLAD1	protein tyrosine phosphatase-like A domain containing 1	-0.5876	9.6986	-6.22507	0.000797387	0.00800751	-0.335026	9.43754	9.37206	9.99087	9.99394
16925508	NM_001256317	TMPRSS3	transmembrane protease, serine 3	0.956075	5.81269	6.22403	0.000798089	0.00800751	-0.335999	6.19348	6.38797	5.14589	5.52342
17086386	NM_006180	NTRK2	neurotrophic tyrosine kinase, receptor, type 2	0.67876	6.46867	6.22393	0.000798158	0.00800751	-0.336094	6.74866	6.86744	6.20984	6.04874
16912140	NM_001247	ENTPD6	ectonucleoside triphosphate diphosphohydrolase 6 (putative)	0.584975	7.8378	6.22112	0.000800068	0.00801853	-0.338735	8.14409	8.11648	7.51925	7.57137
16919209	NR_027241	SNHG17	small nucleolar RNA host gene 17 (non-protein coding)	0.651292	7.64667	6.2137	0.000805132	0.00806111	-0.345706	8.00055	7.94407	7.2404	7.40164
16873675	NM_001127240	BBC3	BCL2 binding component 3	0.604	6.29394	6.21039	0.000807405	0.00807345	-0.348821	6.54658	6.64529	5.9751	6.00877
16713318	NM_005746	NAMPT	nicotinamide phosphoribosyltransferase	0.594169	9.79868	6.20952	0.000807998	0.00807345	-0.349632	10.0943	10.0973	9.54413	9.45906
16740778	NM_001532	SLC29A2	solute carrier family 29 (equilibrative nucleoside transporter), member 2	0.607596	9.20958	6.207	0.000809736	0.00808264	-0.352006	9.46916	9.5576	8.87212	8.93946
16815189	NR_015441	LOC652276	potassium channel tetramerization domain containing 5 pseudogene	0.595348	6.9056	6.20571	0.000810629	0.00808339	-0.353224	7.23256	7.17398	6.64104	6.57481
16881818	NM_001271662	SEMA4F	sema domain, immunoglobulin domain (Ig), transmembrane domain (TM) and short cytoplasmic domain, (semaphorin) 4F	-0.683095	6.49537	-6.2026	0.000812779	0.00809665	-0.356149	6.07684	6.23081	6.76767	6.90616
16993088	NM_001004105	GRK6	G protein-coupled receptor kinase 6	0.640692	10.1139	6.18967	0.00082179	0.00817817	-0.368332	10.4595	10.409	9.71711	9.87001
16904982	ENST00000428156	LOC100130256	uncharacterized LOC100130256	-0.821887	7.51614	-6.18722	0.000823506	0.00817867	-0.370637	7.09185	7.11854	7.76253	8.09164
17049676	NM_000602	SERPINE1	serpin peptidase inhibitor, clade E (nexin, plasminogen activator inhibitor type 1), member 1	0.583234	10.7083	6.18645	0.000824052	0.00817867	-0.371369	10.9928	11.007	10.4476	10.3857
16987565	NM_005575	LNPEP	leucyl/cystinyl aminopeptidase	-0.602397	8.83211	-6.18606	0.000824323	0.00817867	-0.371733	8.51311	8.5487	9.18305	9.08356
16852008	NM_017947	MOCOS	molybdenum cofactor sulfurase	0.662102	5.31698	6.18212	0.000827105	0.00819548	-0.375456	5.56394	5.73213	4.94499	5.02687
16886677	NM_000408	GPD2	glycerol-3-phosphate dehydrogenase 2 (mitochondrial)	-0.677241	8.19929	-6.18131	0.000827676	0.00819548	-0.376218	7.78922	7.93213	8.46551	8.61031
17009862	NM_000947	PRIM2	primase, DNA, polypeptide 2 (58kDa)	-0.673069	6.84595	-6.17378	0.000833021	0.00824015	-0.383331	6.40946	6.60936	7.18378	7.18118
16729789	NM_001293179	PRSS23	protease, serine, 23	0.731536	6.94088	6.17216	0.000834174	0.00824331	-0.384859	7.21073	7.40257	6.48985	6.66039
16782373	NR_110555	LOC102724814	uncharacterized LOC102724814	0.746425	6.14776	6.16875	0.000836606	0.00825909	-0.388077	6.5461	6.49584	5.64181	5.90729
16907960	NM_000465	BARD1	BRCA1 associated RING domain 1	-0.683189	7.23352	-6.16383	0.000840137	0.00828567	-0.392731	6.88374	6.90011	7.46965	7.68058
16860834	NM_001136199	GRAMD1A	GRAM domain containing 1A	0.612478	8.30567	6.16229	0.000841247	0.00828833	-0.394189	8.66017	8.56364	7.95883	8.04003
17003261	NM_080881	DBN1	drebrin 1	0.577538	6.61335	6.15844	0.000844027	0.00829607	-0.397836	6.87737	6.92687	6.33536	6.31381
16914859	NR_030375	MIR645	microRNA 645	-0.598438	6.04317	-6.15686	0.000845172	0.00829607	-0.399333	5.79484	5.69307	6.33259	6.35219
17071321	NM_017890	VPS13B	vacuolar protein sorting 13 homolog B (yeast)	-0.667219	7.18153	-6.15495	0.000846558	0.00829607	-0.401144	6.78482	6.91101	7.59003	7.44024
17064360	NM_004935	CDK5	cyclin-dependent kinase 5	-0.581057	8.43242	-6.1541	0.000847168	0.00829607	-0.401941	8.15096	8.13282	8.69123	8.75467
16714581	NM_194298	SLC16A9	solute carrier family 16, member 9	1.27253	4.98961	6.15355	0.00084757	0.00829607	-0.402464	5.64692	5.60484	4.03383	4.67287
16747236	XM_006718983	LTBR	lymphotoxin beta receptor (TNFR superfamily, member 3)	0.633166	9.23286	6.15281	0.000848108	0.00829607	-0.403166	9.5306	9.56828	8.84042	8.99213
16712035	NM_001039844	ACBD7	acyl-CoA binding domain containing 7	-0.767118	6.3672	-6.15225	0.000848517	0.00829607	-0.403698	5.98493	5.98235	6.89555	6.60596
16893697	NR_024437	LOC728323	uncharacterized LOC728323	0.669643	6.98513	6.1512	0.000849276	0.00829607	-0.404687	7.22868	7.41122	6.68979	6.61082
16846915	NM_005082	TRIM25	tripartite motif containing 25	0.610007	9.94246	6.15078	0.000849587	0.00829607	-0.405091	10.1856	10.3093	9.64194	9.63296
16910284	NM_001085437	C2orf54	chromosome 2 open reading frame 54	-0.758719	6.08769	-6.14788	0.000851703	0.00830851	-0.40784	5.56888	5.84778	6.49093	6.44316
16734271	NM_004420	DUSP8	dual specificity phosphatase 8	1.10288	5.84855	6.14602	0.000853064	0.00831359	-0.409605	6.17066	6.62932	5.43233	5.16188
16687875	NM_002228	JUN	jun proto-oncogene	-0.735541	8.25608	-6.1438	0.00085469	0.00831813	-0.411709	7.79548	7.98113	8.53052	8.71718
16747568	NR_033796	DSTNP2	destrin (actin depolymerizing factor) pseudogene 2	-0.61133	6.33454	-6.14308	0.000855214	0.00831813	-0.412386	5.99539	6.06236	6.69433	6.58607
16926011	NM_001098402	ZBTB21	zinc finger and BTB domain containing 21	0.742958	6.92413	6.13791	0.000859018	0.00834692	-0.417291	7.18571	7.40551	6.47389	6.63142
16998162	NM_001002796	MCTP1	multiple C2 domains, transmembrane 1	-0.713092	5.25917	-6.13264	0.000862921	0.00837661	-0.422302	4.87454	4.93071	5.73448	5.49696
16799244	NM_173611	FAM98B	family with sequence similarity 98, member B	-0.783411	7.30059	-6.12859	0.000865929	0.00838334	-0.426146	6.9279	6.88987	7.84389	7.5407
17119330	NR_000028	SNORD83B	small nucleolar RNA, C/D box 83B	0.653364	7.9129	6.12767	0.00086661	0.00838334	-0.427016	8.24886	8.23032	7.4948	7.67764
16744684	NM_003904	ZPR1	ZPR1 zinc finger	0.626587	8.38999	6.12656	0.000867443	0.00838334	-0.428078	8.70246	8.70411	8.00107	8.15232
16745085	NM_001257191	DDX6	DEAD (Asp-Glu-Ala-Asp) box helicase 6	-0.57182	9.59592	-6.12654	0.000867457	0.00838334	-0.428096	9.29219	9.32783	9.89454	9.86911
16982024	NM_024629	CENPU	centromere protein U	-0.728906	6.72291	-6.12502	0.00086859	0.00838334	-0.429538	6.40229	6.31462	7.2094	6.96532
16941939	ENST00000469484	WNT5A-AS1	WNT5A antisense RNA 1	0.59094	7.73812	6.12487	0.000868704	0.00838334	-0.429684	8.0101	8.05708	7.4012	7.4841
16965527	NM_018323	PI4K2B	phosphatidylinositol 4-kinase type 2 beta	-0.568566	7.47361	-6.11917	0.000872972	0.00840949	-0.4351	7.2017	7.17694	7.76747	7.7483
16717397	NM_004376	COX15	cytochrome c oxidase assembly homolog 15 (yeast)	-0.568678	8.64653	-6.11823	0.000873683	0.00840949	-0.435999	8.37818	8.34621	8.92808	8.93366
16942648	NM_001080393	GXYLT2	glucoside xylosyltransferase 2	-0.612851	7.33418	-6.11785	0.000873967	0.00840949	-0.436359	6.99422	7.0613	7.58298	7.69824
17021122	NM_015525	IBTK	inhibitor of Bruton agammaglobulinemia tyrosine kinase	0.638228	9.12304	6.10956	0.000880228	0.00846149	-0.444249	9.43456	9.44975	8.8877	8.72015
17111262	NM_031407	HUWE1	HECT, UBA and WWE domain containing 1, E3 ubiquitin protein ligase	0.600228	11.6241	6.10216	0.000885864	0.00850739	-0.451303	11.9158	11.9326	11.2666	11.3814
16900022	NM_016618	KRCC1	lysine-rich coiled-coil 1	0.627573	7.68923	6.09678	0.000889989	0.00853871	-0.456437	7.96562	8.04041	7.30668	7.4442
16706135	NM_001242487	ZSWIM8	zinc finger, SWIM-type containing 8	0.710345	7.01364	6.09204	0.00089364	0.00856542	-0.460963	7.47967	7.25795	6.60529	6.71165
16777812	NM_001014380	KATNAL1	katanin p60 subunit A-like 1	-0.76563	7.09394	-6.08683	0.000897671	0.00859572	-0.465937	6.56613	6.85612	7.50441	7.4491
16741405	NM_005247	FGF3	fibroblast growth factor 3	0.621442	8.24646	6.08535	0.000898822	0.00859841	-0.467354	8.4921	8.62227	7.89846	7.97302
16848631	NM_015654	NAT9	N-acetyltransferase 9 (GCN5-related, putative)	0.596959	8.09737	6.08316	0.000900524	0.00860636	-0.469445	8.44812	8.34358	7.82127	7.77652
17121008	NM_001011724	HNRNPA1L2	heterogeneous nuclear ribonucleoprotein A1-like 2	0.583177	8.09509	6.08085	0.00090232	0.00861152	-0.471647	8.4195	8.35386	7.77419	7.83281
17113147	NM_001015881	TSC22D3	TSC22 domain family, member 3	0.61901	5.48709	6.08023	0.000902807	0.00861152	-0.472243	5.7249	5.8683	5.19471	5.16046
16867005	NM_021217	ZNF77	zinc finger protein 77	0.629956	6.06948	6.07904	0.000903737	0.00861208	-0.473381	6.30921	6.45971	5.72463	5.78437
16855196	NM_001080467	MYO5B	myosin VB	0.610397	7.96	6.07238	0.000908965	0.00865356	-0.479758	8.3327	8.1977	7.64491	7.6647
16662885	NM_015038	KIAA0754	KIAA0754	0.689012	7.15297	6.07099	0.000910058	0.00865562	-0.481086	7.46487	7.53008	6.69933	6.9176
16915712	ENST00000497209	SLCO4A1	solute carrier organic anion transporter family, member 4A1	0.578176	8.2731	6.06838	0.000912116	0.00866686	-0.483583	8.58184	8.54254	8.01852	7.94951
17003748	NM_014275	MGAT4B	mannosyl (alpha-1,3-)-glycoprotein beta-1,4-N-acetylglucosaminyltransferase, isozyme B	0.612138	8.80943	6.06646	0.000913638	0.00867298	-0.485426	9.04561	9.18539	8.5046	8.50212
16822939	NM_178167	ZNF598	zinc finger protein 598	0.572804	7.83894	6.0647	0.000915027	0.00867783	-0.487106	8.10339	8.14729	7.52755	7.57752
16966897	NM_024592	SRD5A3	steroid 5 alpha-reductase 3	-0.857708	6.24399	-6.06186	0.000917282	0.00869087	-0.489826	5.75096	5.87931	6.49891	6.84678
16762837	NM_001002259	CAPRIN2	caprin family member 2	0.718252	7.57876	6.06043	0.000918427	0.00869338	-0.491205	7.98446	7.89131	7.10006	7.3392
16775434	NM_005358	LMO7	LIM domain 7	-0.669587	6.53369	-6.05547	0.00092238	0.00872245	-0.495953	6.15513	6.24267	6.96387	6.77309
16752624	NM_001099337	COQ10A	coenzyme Q10 homolog A (S. cerevisiae)	-0.570394	5.65828	-6.05327	0.000924145	0.0087239	-0.498066	5.34612	5.40004	5.92751	5.95945
16841525	NM_006042	HS3ST3A1	heparan sulfate (glucosamine) 3-O-sulfotransferase 3A1	0.582355	6.28983	6.05308	0.000924299	0.0087239	-0.498251	6.57796	6.58406	5.95281	6.0445
17094755	NR_039990	SMC5-AS1	SMC5 antisense RNA 1 (head to head)	-0.843516	6.0519	-6.05156	0.00092552	0.00872692	-0.49971	5.69801	5.56227	6.30634	6.64097
16884200	NM_023016	SOWAHC	sosondowah ankyrin repeat domain family member C	0.581691	6.86512	6.05048	0.000926385	0.00872692	-0.500743	7.11309	7.19884	6.58956	6.55899
17093595	NM_004629	FANCG	Fanconi anemia, complementation group G	-0.633872	7.43419	-6.04879	0.000927747	0.00872761	-0.502367	7.20083	7.03367	7.73388	7.76837
16778067	NM_001195415	DCLK1	doublecortin-like kinase 1	-0.565877	8.22181	-6.04792	0.000928452	0.00872761	-0.503207	7.9153	7.96244	8.49747	8.51203
16954827	NM_001134231	NT5DC2	5-nucleotidase domain containing 2	-0.571162	8.49327	-6.0471	0.000929108	0.00872761	-0.503987	8.17471	8.24066	8.77431	8.78339
16891392	NM_001005209	TMEM198	transmembrane protein 198	0.571137	6.79947	6.04264	0.000932716	0.00875318	-0.508272	7.08083	7.08924	6.54748	6.48032
17084936	NM_001289119	ZCCHC7	zinc finger, CCHC domain containing 7	0.605887	8.2961	6.03864	0.000935969	0.00877538	-0.512121	8.53397	8.66412	8.01068	7.97564
16873528	ENST00000598518	LOC645553	uncharacterized LOC645553	0.946015	9.38752	6.02994	0.00094308	0.00883367	-0.520489	9.77779	9.94327	9.11772	8.71131
16778559	NM_001002264	EPSTI1	epithelial stromal interaction 1 (breast)	0.594852	5.95284	6.02689	0.000945583	0.00884872	-0.523419	6.21859	6.28194	5.70604	5.60478
17053436	ENST00000467291	AOC1	amine oxidase, copper containing 1	-0.594251	5.67963	-6.02454	0.000947523	0.00885849	-0.525685	5.43842	5.32658	5.95666	5.99685
16771570	ENST00000535560	RHOF	ras homolog family member F (in filopodia)	0.585351	8.14772	6.02141	0.00095011	0.00887006	-0.528699	8.44199	8.4388	7.80318	7.90692
17070972	NM_181787	DPY19L4	dpy-19-like 4 (C. elegans)	-0.571971	7.89013	-6.02021	0.000951102	0.00887006	-0.529853	7.56658	7.64171	8.17253	8.1797
16878616	NM_001287527	CLIP4	CAP-GLY domain containing linker protein family, member 4	1.57971	5.56245	6.0197	0.000951527	0.00887006	-0.530346	6.23908	6.46553	4.36279	5.18241
16920548	NM_003600	AURKA	aurora kinase A	-0.638347	8.29722	-6.01832	0.000952676	0.00887006	-0.531682	7.99034	7.96576	8.52731	8.70549
16827041	NM_001797	CDH11	cadherin 11, type 2, OB-cadherin (osteoblast)	0.591521	6.21315	6.01763	0.000953249	0.00887006	-0.532346	6.49077	6.52705	5.86261	5.97216
16834921	NM_006460	HEXIM1	hexamethylene bis-acetamide inducible 1	-0.710735	7.448	-6.01315	0.000956977	0.00889637	-0.536661	7.19373	6.99152	7.72579	7.88094
16790776	NM_020834	HOMEZ	homeobox and leucine zipper encoding	0.707511	6.20015	6.00937	0.000960141	0.0089174	-0.54031	6.49846	6.60935	5.73308	5.95971
16824366	NR_036447	PKD1P1	polycystic kidney disease 1 (autosomal dominant) pseudogene 1	0.575253	9.23075	6.00431	0.000964394	0.00894031	-0.545197	9.52809	9.50867	8.90086	8.98539
16937930	ENST00000306024	3	LSM3 homolog, U6 small nuclear RNA associated (S. cerevisiae)	-0.624363	6.67262	-6.00428	0.000964418	0.00894031	-0.545224	6.29902	6.42187	6.92998	7.03962
16884679	NR_015377	PAX8-AS1	PAX8 antisense RNA 1	0.56656	8.26847	5.9909	0.000975761	0.009037	-0.558154	8.55615	8.54735	8.01918	7.9512
16775364	NM_001286818	KLF5	Kruppel-like factor 5 (intestinal)	0.720107	9.63226	5.98585	0.000980079	0.00905927	-0.563035	10.0437	9.94089	9.39509	9.14932
16802232	NR_027654	SMAD6	SMAD family member 6	1.22766	4.96552	5.98573	0.00098018	0.00905927	-0.56315	5.73888	5.41982	4.07785	4.62554
17055191	ENST00000223129	RPA3	replication protein A3, 14kDa	-0.624931	6.78606	-5.98417	0.000981524	0.00905927	-0.564665	6.48755	6.45963	7.01569	7.18135
16673983	NM_018122	DARS2	aspartyl-tRNA synthetase 2, mitochondrial	-0.630775	8.57387	-5.98341	0.000982181	0.00905927	-0.565405	8.17112	8.34584	8.88246	8.89606
16834056	NM_001254	CDC6	cell division cycle 6	-0.64284	8.89345	-5.98274	0.00098275	0.00905927	-0.566045	8.50505	8.63901	9.28185	9.14789
16998112	NM_001163417	FAM172A	family with sequence similarity 172, member A	-0.613316	6.32735	-5.97227	0.000991813	0.00913429	-0.576195	5.95298	6.0884	6.67133	6.59669
17019831	NM_000255	MUT	methylmalonyl CoA mutase	-0.553306	7.39866	-5.96969	0.000994057	0.00914644	-0.578695	7.13282	7.11119	7.67464	7.67599
16696062	NR_026550	MPC2	mitochondrial pyruvate carrier 2	-0.6533	7.36451	-5.96775	0.000995753	0.00915352	-0.580579	7.12009	6.95562	7.75052	7.63179
16875074	NM_030972	ZNF611	zinc finger protein 611	-0.56629	6.68695	-5.96582	0.000997435	0.00915833	-0.582445	6.40274	6.40486	7.00716	6.93303
16873049	NM_145296	CADM4	cell adhesion molecule 4	0.55757	9.57087	5.96503	0.00099813	0.00915833	-0.583216	9.83355	9.86575	9.27484	9.30933
17021281	NM_001286206	CEP162	centrosomal protein 162kDa	-0.643114	5.74237	-5.95954	0.00100295	0.00919402	-0.588542	5.44835	5.39327	6.15619	5.97165
16752305	NM_001290230	CDK2	cyclin-dependent kinase 2	-0.633423	8.45697	-5.95546	0.00100655	0.00920973	-0.592509	8.06821	8.2123	8.71814	8.82921
17019484	NM_001286216	GTPBP2	GTP binding protein 2	0.776588	6.90314	5.95515	0.00100683	0.00920973	-0.592808	7.17503	7.40785	6.62341	6.40629
16744138	NM_015065	EXPH5	exophilin 5	-0.590127	7.38656	-5.95444	0.00100746	0.00920973	-0.593504	7.03213	7.15087	7.66479	7.69847
16850625	NM_001278682	TGIF1	TGFB-induced factor homeobox 1	0.577031	6.63605	5.95165	0.00100993	0.00922378	-0.596213	6.8756	6.97354	6.35957	6.33551
16975954	NM_152540	SCFD2	sec1 family domain containing 2	-0.560697	8.01626	-5.94911	0.00101219	0.00922595	-0.598681	7.72653	7.74529	8.32669	8.26652
16773874	NM_015032	PDS5B	PDS5, regulator of cohesion maintenance, homolog B (S. cerevisiae)	-0.656352	9.33831	-5.94785	0.00101331	0.00922595	-0.599911	8.9451	9.07517	9.74795	9.58501
16926527	NM_015227	POFUT2	protein O-fucosyltransferase 2	0.927718	6.34734	5.94688	0.00101417	0.00922595	-0.600846	7.02819	6.59421	5.86858	5.89839
17079808	NM_001172477	RRM2B	ribonucleotide reductase M2 B (TP53 inducible)	-0.754681	6.27799	-5.94533	0.00101556	0.00922595	-0.602359	5.85468	5.94662	6.79868	6.51198
17121430	NR_040023	ERVK13-1	endogenous retrovirus group K13, member 1	-0.65126	5.7712	-5.94466	0.00101615	0.00922595	-0.603005	5.39951	5.49163	6.18749	6.00617
16868827	NM_024029	YIPF2	Yip1 domain family, member 2	0.55678	9.05394	5.94258	0.00101802	0.00922595	-0.605037	9.3072	9.35746	8.76856	8.78254
16786248	NM_001037161	ACOT1	acyl-CoA thioesterase 1	-0.576966	5.35098	-5.94161	0.00101889	0.00922595	-0.605981	5.01361	5.11139	5.65499	5.62394
17088006	NM_007203	PALM2-AKAP2	PALM2-AKAP2 readthrough	0.591964	5.94173	5.94125	0.00101921	0.00922595	-0.606325	6.29401	6.18143	5.61485	5.67666
17043157	uc003sna.1	FOXK1	forkhead box K1	0.562641	9.09189	5.94121	0.00101924	0.00922595	-0.606364	9.40367	9.34274	8.82848	8.79265
16945320	ENST00000515725	COPG1	coatomer protein complex, subunit gamma 1	0.570328	10.0964	5.94092	0.0010195	0.00922595	-0.606645	10.337	10.4261	9.80865	9.81384
16841852	NM_178836	PLD6	phospholipase D family, member 6	0.571274	7.40148	5.93972	0.00102059	0.00922729	-0.607819	7.65579	7.71845	7.08249	7.14921
17020823	NM_012434	SLC17A5	solute carrier family 17 (acidic sugar transporter), member 5	0.604261	7.76192	5.93373	0.00102598	0.00923095	-0.613651	7.99871	8.12939	7.49416	7.42541
16748205	NM_001004419	CLEC2D	C-type lectin domain family 2, member D	0.583281	5.48076	5.93255	0.00102705	0.00923095	-0.6148	5.73682	5.80798	5.14355	5.23468
16809187	ENST00000261854	SPPL2A	signal peptide peptidase like 2A	-0.566196	8.34142	-5.93051	0.0010289	0.00923095	-0.616791	8.03167	8.08497	8.65579	8.59324
16830488	NM_000937	POLR2A	polymerase (RNA) II (DNA directed) polypeptide A, 220kDa	-0.60499	10.6476	-5.93039	0.00102901	0.00923095	-0.616909	10.4012	10.289	10.901	10.9992
16691969	OTTHUMT00000384603	RP4-791M13.3	novel transcript	-0.898927	6.14863	-5.92958	0.00102975	0.00923095	-0.6177	5.49794	5.9004	6.54557	6.65062
16788014	NM_001252507	C14orf132	chromosome 14 open reading frame 132	-0.666924	5.30866	-5.92937	0.00102994	0.00923095	-0.617905	4.87388	5.07651	5.59714	5.6871
16784333	NM_001161576	SAMD4A	sterile alpha motif domain containing 4A	0.632509	7.12645	5.92926	0.00103003	0.00923095	-0.618007	7.46136	7.42405	6.72004	6.90035
16862996	NM_001135770	PVR	poliovirus receptor	0.711431	8.68091	5.92896	0.00103031	0.00923095	-0.618301	8.93358	9.13967	8.2421	8.40829
16686695	NM_001042546	ATPAF1	ATP synthase mitochondrial F1 complex assembly factor 1	-0.569112	6.58426	-5.9288	0.00103045	0.00923095	-0.618457	6.32468	6.27472	6.90572	6.8319
16814083	ENST00000293861	SNRNP25	small nuclear ribonucleoprotein 25kDa (U11/U12)	-0.628724	5.42986	-5.92869	0.00103055	0.00923095	-0.618561	5.03751	5.19349	5.69957	5.78888
17071208	NM_018407	LAPTM4B	lysosomal protein transmembrane 4 beta	-0.549942	8.76826	-5.92649	0.00103255	0.00923095	-0.620708	8.48532	8.50125	9.05391	9.03255
16907409	OTTHUMT00000336165	AC079354.5	novel transcript	-0.644637	5.34872	-5.92618	0.00103284	0.00923095	-0.621015	4.93993	5.11287	5.71958	5.6225
16969414	NM_001127208	TET2	tet methylcytosine dioxygenase 2	-0.550528	6.42847	-5.92529	0.00103364	0.00923095	-0.621876	6.14164	6.16477	6.69329	6.71418
16776905	NR_026580	TFDP1	transcription factor Dp-1	-0.658575	7.50424	-5.92483	0.00103407	0.00923095	-0.622332	7.26817	7.08174	7.78146	7.88561
16659865	NM_001271869	SZRD1	SUZ RNA binding domain containing 1	-0.566356	6.1812	-5.92098	0.00103758	0.00925174	-0.626086	5.93599	5.86007	6.48311	6.44565
16785483	NM_004480	FUT8	fucosyltransferase 8 (alpha (1,6) fucosyltransferase)	0.567833	7.54317	5.92023	0.00103827	0.00925174	-0.626816	7.79899	7.85518	7.29321	7.2253
16659940	OTTHUMT00000006253	RP11-108M9.2	putative novel transcript	-0.659961	5.48003	-5.91838	0.00103996	0.00925849	-0.628619	5.22083	5.07927	5.7286	5.89142
17018685	NM_016059	PPIL1	peptidylprolyl isomerase (cyclophilin)-like 1	-0.60922	8.32908	-5.91654	0.00104166	0.00925987	-0.630424	7.95781	8.09112	8.67497	8.5924
16875734	NM_144613	COX6B2	cytochrome c oxidase subunit VIb polypeptide 2 (testis)	1.18416	5.97882	5.91618	0.00104199	0.00925987	-0.630775	6.39814	6.74366	5.6409	5.13259
16781059	NM_001286721	ANKRD10	ankyrin repeat domain 10	0.611878	8.08997	5.91388	0.00104411	0.00927032	-0.633016	8.32771	8.4641	7.74156	7.8265
16811730	NM_020447	FAM219B	family with sequence similarity 219, member B	0.563909	5.72374	5.90886	0.00104875	0.00930319	-0.637925	5.96923	6.04216	5.46016	5.42342
16670739	NM_006818	MLLT11	myeloid/lymphoid or mixed-lineage leukemia (trithorax homolog, Drosophila); translocated to, 11	-0.579975	6.97936	-5.90598	0.00105142	0.00931481	-0.640741	6.65887	6.71988	7.31774	7.22096
16828327	NM_018124	RFWD3	ring finger and WD repeat domain 3	-0.555924	9.41571	-5.90431	0.00105298	0.00931481	-0.642375	9.10882	9.16668	9.6835	9.70385
16848731	NR_045513	NT5C	5, 3-nucleotidase, cytosolic	0.591635	7.03203	5.90317	0.00105404	0.00931481	-0.643488	7.29391	7.36178	6.79386	6.67856
16835125	NM_004287	GOSR2	golgi SNAP receptor complex member 2	0.584442	8.69977	5.90252	0.00105464	0.00931481	-0.644121	8.9388	9.04518	8.37713	8.43796
17046135	NM_005228	EGFR	epidermal growth factor receptor	0.57329	9.83543	5.90238	0.00105477	0.00931481	-0.644258	10.107	10.1372	9.49962	9.59795
16835672	NM_002204	ITGA3	integrin, alpha 3 (antigen CD49C, alpha 3 subunit of VLA-3 receptor)	0.622362	11.6087	5.89771	0.00105914	0.00933737	-0.648829	11.9868	11.8529	11.2404	11.3546
16891101	NM_006522	WNT6	wingless-type MMTV integration site family, member 6	-0.577985	7.34885	-5.89763	0.00105922	0.00933737	-0.648907	7.08429	7.03541	7.58725	7.68842
16892012	OTTHUMT00000332617	AC012507.4	putative novel transcript	-0.902537	5.21168	-5.89622	0.00106054	0.00934067	-0.650285	4.66221	4.85862	5.47601	5.8499
16721375	NM_000543	SMPD1	sphingomyelin phosphodiesterase 1, acid lysosomal	-0.563354	7.57251	-5.89412	0.00106252	0.00934978	-0.652348	7.27409	7.30757	7.81585	7.89252
16760048	ENST00000537018	FOXM1	forkhead box M1	-0.5527	9.77426	-5.89174	0.00106476	0.00936114	-0.654675	9.50817	9.48766	10.0759	10.0253
16990389	NM_001130029	RELL2	RELT-like 2	0.616606	7.32683	5.88891	0.00106743	0.00937634	-0.657453	7.63501	7.63525	6.9335	7.10355
16894995	NR_046836	HS1BP3-IT1	HS1BP3 intronic transcript 1 (non-protein coding)	-0.588241	6.53015	-5.8871	0.00106914	0.00937872	-0.659219	6.24716	6.22489	6.88884	6.7597
16825427	NM_024816	RABEP2	rabaptin, RAB GTPase binding effector protein 2	-0.552158	6.04677	-5.88662	0.0010696	0.00937872	-0.659699	5.79759	5.74379	6.32685	6.31885
16935703	NM_001142293	ARFGAP3	ADP-ribosylation factor GTPase activating protein 3	0.594447	8.21123	5.8831	0.00107294	0.00939968	-0.663149	8.54147	8.47544	7.97629	7.85172
16969344	NM_001008388	CISD2	CDGSH iron sulfur domain 2	-0.559738	7.78	-5.87803	0.00107778	0.00943367	-0.668121	7.49674	7.50352	8.09906	8.02068
16837418	NM_000346	SOX9	SRY (sex determining region Y)-box 9	0.546418	11.7181	5.87464	0.00108103	0.00945192	-0.671452	12.0086	11.974	11.4453	11.4445
17022216	NM_032730	RTN4IP1	reticulon 4 interacting protein 1	-0.654028	5.55772	-5.87386	0.00108178	0.00945192	-0.672216	5.31364	5.14777	5.81655	5.95292
16924966	NM_018944	MIS18A	MIS18 kinetochore protein A	-0.54959	7.51533	-5.87206	0.0010835	0.00945861	-0.673976	7.22324	7.25783	7.77208	7.80816
16887360	ENST00000272793	UBR3	ubiquitin protein ligase E3 component n-recognin 3 (putative)	-0.581427	8.2729	-5.87036	0.00108515	0.00945968	-0.675655	7.92079	8.04358	8.56219	8.56505
17092490	NM_001190737	NFIB	nuclear factor I/B	-0.580968	6.08188	-5.86922	0.00108624	0.00945968	-0.676768	5.85146	5.73133	6.3837	6.36102
17047688	ENST00000445288	RSBN1L	round spermatid basic protein 1-like	-0.620213	8.03833	-5.8682	0.00108722	0.00945968	-0.677771	7.81391	7.64254	8.37097	8.3259
16738479	NM_001278201	SLC43A3	solute carrier family 43, member 3	-0.610285	7.72563	-5.86744	0.00108796	0.00945968	-0.67852	7.34798	7.49299	7.99156	8.06999
17097914	NM_001286840	PHF19	PHD finger protein 19	-0.6187	8.27125	-5.86698	0.00108841	0.00945968	-0.678976	8.04278	7.88103	8.54656	8.61465
16869299	NM_001100176	HOOK2	hook microtubule-tethering protein 2	0.56493	7.76218	5.86153	0.00109369	0.00948901	-0.68433	8.05159	8.0377	7.43322	7.52621
17052673	ENST00000390413	TRBJ2-2	T cell receptor beta joining 2-2	0.568981	6.5531	5.86054	0.00109465	0.00948901	-0.685302	6.79509	6.8801	6.29714	6.24009
16762700	NM_016570	ERGIC2	ERGIC and golgi 2	-0.584843	8.97491	-5.85976	0.00109541	0.00948901	-0.686072	8.65594	8.70903	9.32667	9.20799
16700289	NM_018230	NUP133	nucleoporin 133kDa	-0.580821	7.87639	-5.85954	0.00109562	0.00948901	-0.686285	7.52418	7.64777	8.16721	8.16638
16708880	NR_038940	SH3PXD2A-AS1	SH3PXD2A antisense RNA 1	-0.703107	6.75237	-5.85527	0.0010998	0.00951679	-0.690487	6.43474	6.3669	6.97572	7.23213
16937201	NM_001080517	SETD5	SET domain containing 5	0.560865	8.18385	5.85191	0.00110309	0.00953699	-0.6938	8.45796	8.47062	7.86028	7.94656
16771067	NM_001206999	CIT	citron rho-interacting serine/threonine kinase	-0.553026	7.65508	-5.84858	0.00110636	0.00955688	-0.697071	7.3877	7.36943	7.89866	7.96452
17091877	NR_027156	TUBBP5	tubulin, beta pseudogene 5	-1.15181	5.51922	-5.84194	0.00111293	0.00960522	-0.703619	5.24369	4.64294	6.06966	6.12058
16906000	NM_178123	SESTD1	SEC14 and spectrin domains 1	-0.923109	5.47725	-5.83954	0.00111531	0.00961116	-0.705986	4.99629	5.03511	6.15991	5.7177
16783836	NM_020937	FANCM	Fanconi anemia, complementation group M	-1.22455	5.45307	-5.83861	0.00111624	0.00961116	-0.706908	4.53395	5.14765	6.1751	5.95559
16758879	NM_080626	BRI3BP	BRI3 binding protein	-0.638233	9.12965	-5.83831	0.00111654	0.00961116	-0.707197	8.89381	8.72725	9.39175	9.50579
16823928	NM_004862	LITAF	lipopolysaccharide-induced TNF factor	0.568604	9.19659	5.83169	0.00112315	0.00965967	-0.713729	9.43094	9.53084	8.93146	8.89311
16978334	ENST00000511203	H2AFZ	H2A histone family, member Z	-0.541013	7.12739	-5.82973	0.00112512	0.00966043	-0.71567	6.863	6.85076	7.38587	7.40993
16752639	XR_429146	LOC102724133	uncharacterized LOC102724133	-0.579579	5.38937	-5.82896	0.00112589	0.00966043	-0.716424	5.06787	5.1313	5.62443	5.73389
16721905	ENST00000525063	ADM	adrenomedullin	-0.609928	6.5013	-5.82868	0.00112617	0.00966043	-0.716701	6.12903	6.26365	6.85782	6.75472
17084605	NM_006377	UNC13B	unc-13 homolog B (C. elegans)	-0.654178	7.77822	-5.82661	0.00112826	0.00966994	-0.71875	7.3417	7.56057	8.09213	8.11849
16750360	ENST00000422737	ARID2	AT rich interactive domain 2 (ARID, RFX-like)	-0.565824	8.81053	-5.82399	0.0011309	0.00968417	-0.721335	8.47641	8.57883	9.09952	9.08736
17016503	NM_003533	HIST1H3I	histone cluster 1, H3i	-0.572456	12.5501	-5.81499	0.00114003	0.00975394	-0.730234	12.2054	12.3223	12.8373	12.8353
16989897	XM_006714786	CXXC5	CXXC finger protein 5	-0.539578	8.81093	-5.81092	0.0011442	0.00978009	-0.734269	8.53522	8.54707	9.09402	9.06742
17015207	NM_183373	PXDC1	PX domain containing 1	0.614133	7.17075	5.81007	0.00114507	0.00978009	-0.735109	7.40701	7.54863	6.91699	6.81038
17123560	NR_103825	LOC729218	uncharacterized LOC729218	0.563795	8.44051	5.80588	0.00114937	0.00980837	-0.739259	8.67113	8.77369	8.16035	8.15688
17082081	NR_026785	RHPN1-AS1	RHPN1 antisense RNA 1 (head to head)	-0.538354	5.83266	-5.80352	0.00115181	0.00982066	-0.7416	5.57581	5.55115	6.10474	6.09894
16806870	ENST00000354181	SLC12A6	solute carrier family 12 (potassium/chloride transporter), member 6	-0.615412	6.27633	-5.80196	0.00115341	0.00982588	-0.743141	5.94794	5.98931	6.49651	6.67157
17095828	NR_003704	SNORA84	small nucleolar RNA, H/ACA box 84	0.597221	8.82272	5.79941	0.00115605	0.00983987	-0.745668	9.04588	9.19679	8.54558	8.50264
17055697	NM_001127370	CDCA7L	cell division cycle associated 7-like	-0.65009	7.59482	-5.79596	0.00115963	0.00986188	-0.749092	7.16269	7.37686	7.8952	7.94453
16918455	NM_007238	PXMP4	peroxisomal membrane protein 4, 24kDa	-0.559204	7.61586	-5.79275	0.00116297	0.00988176	-0.752271	7.31042	7.3621	7.93587	7.85506
16827805	NM_001195139	COG4	component of oligomeric golgi complex 4	-0.562438	7.90478	-5.7883	0.00116763	0.0099128	-0.756692	7.66995	7.57717	8.16329	8.2087
16858774	NM_004343	CALR	calreticulin	-0.546986	11.5483	-5.78371	0.00117245	0.00992682	-0.761247	11.2855	11.2641	11.7892	11.8544
16743056	NM_001014811	ME3	malic enzyme 3, NADP(+)-dependent, mitochondrial	0.790013	6.58672	5.78371	0.00117245	0.00992682	-0.761255	6.99328	6.97018	6.01807	6.36537
17012047	NM_173674	DCBLD1	discoidin, CUB and LCCL domain containing 1	-0.686169	7.0707	-5.7831	0.00117309	0.00992682	-0.761853	6.78793	6.6673	7.52748	7.30009
16690427	NM_001102592	HENMT1	HEN1 methyltransferase homolog 1 (Arabidopsis)	-0.801228	5.97867	-5.78273	0.00117348	0.00992682	-0.762225	5.40137	5.75475	6.35308	6.40549
17064150	NM_152411	ZNF786	zinc finger protein 786	-0.570528	6.38861	-5.78195	0.0011743	0.00992682	-0.762997	6.11896	6.08773	6.73139	6.61636
17049149	NM_152755	CNPY4	canopy FGF signaling regulator 4	-0.56378	5.7971	-5.77816	0.00117831	0.00995218	-0.766766	5.50374	5.52668	6.13163	6.02635
17094855	NM_001025780	ABHD17B	abhydrolase domain containing 17B	-0.543844	7.94342	-5.77605	0.00118054	0.00995501	-0.768863	7.67642	7.66656	8.2456	8.18508
16868254	NM_144693	ZNF558	zinc finger protein 558	0.559171	6.44486	5.77594	0.00118066	0.00995501	-0.76897	6.67688	6.77202	6.17932	6.15124
16865128	NM_002739	PRKCG	protein kinase C, gamma	0.60856	5.77539	5.77472	0.00118196	0.00995745	-0.770185	5.99249	6.16686	5.47845	5.46378
16942042	NM_177966	PDE12	phosphodiesterase 12	-0.538934	7.51621	-5.77089	0.00118604	0.00998334	-0.774	7.2666	7.22689	7.77496	7.7964
16806757	NM_001277313	FMN1	formin 1	0.624798	6.19899	5.76745	0.00118971	0.0100057	-0.77742	6.42713	6.59564	5.93603	5.83714
16850663	ENST00000572856	DLGAP1-AS2	DLGAP1 antisense RNA 2	0.740934	8.24797	5.76566	0.00119163	0.0100134	-0.779206	8.50462	8.73225	7.77304	7.98196
16726633	NM_006782	ZFPL1	zinc finger protein-like 1	0.647945	7.66325	5.76427	0.00119312	0.0100173	-0.780582	7.87659	8.09785	7.33985	7.33871
16909700	NM_018410	HJURP	Holliday junction recognition protein	-0.630144	8.80597	-5.76321	0.00119426	0.0100184	-0.781645	8.50199	8.47981	9.02066	9.22143
16969686	NM_017918	CCDC109B	coiled-coil domain containing 109B	-0.626722	7.82754	-5.75312	0.00120517	0.0100946	-0.791699	7.52465	7.50371	8.24003	8.04177
17013126	NM_001032394	GPR126	G protein-coupled receptor 126	-0.92206	6.10495	-5.75292	0.00120538	0.0100946	-0.791898	5.429	5.85884	6.63788	6.49408
16755928	ENST00000412715	PARPBP	PARP1 binding protein	-0.655455	6.42574	-5.75164	0.00120677	0.0100977	-0.793175	6.00083	6.19519	6.8155	6.69143
16986748	NM_002439	MSH3	mutS homolog 3	-0.565126	8.26567	-5.74762	0.00121115	0.0101257	-0.797183	7.94241	8.02381	8.58932	8.50715
16955939	ENST00000273261	LRIG1	leucine-rich repeats and immunoglobulin-like domains 1	0.608433	8.63764	5.74258	0.00121668	0.0101633	-0.802219	8.91308	8.97063	8.24865	8.41819
16966049	NM_001007075	KLHL5	kelch-like family member 5	0.531017	8.72429	5.74153	0.00121784	0.0101644	-0.803273	8.99244	8.98715	8.45904	8.45852
16697985	NM_138795	ARL8A	ADP-ribosylation factor-like 8A	0.542445	8.24054	5.74036	0.00121912	0.0101666	-0.804438	8.53432	8.4892	7.94432	7.9943
16959575	ENST00000363701	RNU6-1284P	RNA, U6 small nuclear 1284, pseudogene	-1.5772	5.07148	-5.73611	0.00122381	0.0101762	-0.808687	4.64065	3.92512	5.58997	6.13019
17123142	XM_005276229	LOC101929530	Fanconi anemia group D2 protein-like	-0.646708	7.66308	-5.73609	0.00122384	0.0101762	-0.808707	7.40364	7.2758	7.89488	8.07798
16810933	NM_001289986	TIPIN	TIMELESS interacting protein	-0.658262	6.55872	-5.73579	0.00122417	0.0101762	-0.809006	6.13059	6.32859	6.82426	6.95143
16854202	NM_138340	ABHD3	abhydrolase domain containing 3	-0.758547	6.75117	-5.73557	0.0012244	0.0101762	-0.80922	6.53551	6.20828	7.12587	7.13502
16792287	NM_203301	FBXO33	F-box protein 33	-0.630209	6.74232	-5.73287	0.0012274	0.0101926	-0.811925	6.37065	6.48377	6.97146	7.14338
16815985	NM_014048	MKL2	MKL/myocardin-like 2	-0.533712	8.48014	-5.73174	0.00122865	0.0101944	-0.81305	8.21229	8.21427	8.72814	8.76585
16802519	NM_001281301	KIF23	kinesin family member 23	-0.560839	9.85387	-5.72649	0.0012345	0.0102243	-0.818302	9.62789	9.51902	10.1219	10.1467
16906534	NM_007315	STAT1	signal transducer and activator of transcription 1, 91kDa	-0.531243	9.57042	-5.72589	0.00123517	0.0102243	-0.818905	9.31761	9.29199	9.83378	9.83831
16795943	NM_001128595	TC2N	tandem C2 domains, nuclear	0.541471	8.66362	5.72572	0.00123536	0.0102243	-0.819079	8.90089	8.96782	8.40023	8.38554
16787352	NR_036500	FOXN3-AS1	FOXN3 antisense RNA 1	-0.736401	5.48418	-5.72422	0.00123704	0.0102296	-0.820577	4.9613	5.27067	5.85901	5.84576
16667258	NM_001024948	FNBP1L	formin binding protein 1-like	0.550955	8.88155	5.71985	0.00124194	0.0102375	-0.824957	9.12434	9.18972	8.63938	8.57277
17005169	NM_153042	KDM1B	lysine (K)-specific demethylase 1B	0.581157	8.08697	5.71977	0.00124204	0.0102375	-0.825039	8.31091	8.44419	7.7669	7.82589
16908897	NM_004438	EPHA4	EPH receptor A4	-0.535729	7.27507	-5.71921	0.00124266	0.0102375	-0.825591	7.01537	6.99903	7.56745	7.51841
16922275	NM_005534	IFNGR2	interferon gamma receptor 2 (interferon gamma transducer 1)	0.551538	7.02648	5.71901	0.00124289	0.0102375	-0.825798	7.30366	7.30083	6.70335	6.79807
16878748	NM_014946	SPAST	spastin	-0.656226	7.9557	-5.71876	0.00124317	0.0102375	-0.826051	7.5294	7.72577	8.34858	8.21905
16877473	NM_001130009	GEN1	GEN1 Holliday junction 5 flap endonuclease	-0.73108	7.95176	-5.71579	0.00124652	0.0102566	-0.829027	7.53126	7.64117	8.17453	8.46006
16915740	NM_002531	NTSR1	neurotensin receptor 1 (high affinity)	0.562519	9.66386	5.71136	0.00125153	0.0102892	-0.833463	9.90345	9.9868	9.34129	9.42392
17051392	NM_005631	SMO	smoothened, frizzled class receptor	-0.584474	5.6726	-5.70878	0.00125446	0.0103047	-0.836051	5.42233	5.33839	5.90139	6.02827
17049573	NM_001128852	SRRT	serrate, RNA effector molecule	-0.544778	8.45801	-5.70606	0.00125756	0.0103216	-0.838785	8.18901	8.18222	8.68943	8.77136
16821562	NM_001286565	KIAA0513	KIAA0513	-0.625633	5.50973	-5.70429	0.00125958	0.0103296	-0.840561	5.0963	5.29753	5.83984	5.80525
16830173	NM_001195228	FAM64A	family with sequence similarity 64, member A	-0.572688	7.17929	-5.70196	0.00126225	0.0103423	-0.8429	6.82528	6.96061	7.47065	7.46061
16767751	NM_007350	PHLDA1	pleckstrin homology-like domain, family A, member 1	0.532339	7.92647	5.7011	0.00126323	0.0103423	-0.843756	8.17548	8.20981	7.64592	7.67469
16697695	NM_014875	KIF14	kinesin family member 14	-0.675346	8.72763	-5.70002	0.00126447	0.010344	-0.844848	8.35406	8.42585	9.1884	8.9422
16827687	NM_014062	NOB1	NIN1/RPN12 binding protein 1 homolog (S. cerevisiae)	0.547992	10.1216	5.69461	0.00127069	0.0103782	-0.850277	10.4417	10.3496	9.84888	9.8464
16665086	OTTHUMT00000027682	RP11-67L3.5	novel transcript	-0.573942	5.48595	-5.69456	0.00127075	0.0103782	-0.850329	5.22333	5.17463	5.70794	5.8379
16938701	NM_001039111	TRIM71	tripartite motif containing 71, E3 ubiquitin protein ligase	-1.21802	5.02009	-5.69347	0.00127201	0.0103799	-0.851426	4.07751	4.74464	5.61269	5.6455
16938322	NM_152653	UBE2E2	ubiquitin-conjugating enzyme E2E 2	0.608857	6.48406	5.68875	0.00127748	0.0104159	-0.856167	6.71727	6.85971	6.23988	6.11938
16846291	NM_024017	HOXB9	homeobox B9	0.580195	9.58345	5.68433	0.00128263	0.0104492	-0.86062	9.92647	9.82062	9.3462	9.2405
16820601	NM_001113178	NFAT5	nuclear factor of activated T-cells 5, tonicity-responsive	0.535251	10.0931	5.68306	0.00128411	0.0104515	-0.861899	10.3458	10.3756	9.79838	9.85256
17048083	NM_001040665	STEAP2	STEAP family member 2, metalloreductase	0.881964	7.2669	5.68228	0.00128502	0.0104515	-0.862684	7.52823	7.88754	6.94549	6.70635
16839604	NR_003072	SNORD91A	small nucleolar RNA, C/D box 91A	0.538511	6.52109	5.6803	0.00128734	0.0104557	-0.864675	6.75987	6.82084	6.2324	6.27128
17005996	ENST00000390938	RNU6-930P	RNA, U6 small nuclear 930, pseudogene	-0.554911	5.40111	-5.67996	0.00128773	0.0104557	-0.865011	5.08031	5.16701	5.64545	5.71169
16854268	NM_000271	NPC1	Niemann-Pick disease, type C1	0.554489	9.56767	5.67817	0.00128984	0.0104557	-0.866821	9.81827	9.87155	9.33776	9.24308
16963389	NM_032898	CEP19	centrosomal protein 19kDa	-0.851389	6.49329	-5.67766	0.00129043	0.0104557	-0.867332	5.88335	6.25185	7.00739	6.83058
16997199	NM_001256574	ENC1	ectodermal-neural cortex 1 (with BTB domain)	-0.861876	7.15858	-5.67732	0.00129083	0.0104557	-0.86767	6.53407	6.92121	7.51223	7.6668
16668420	NM_000757	CSF1	colony stimulating factor 1 (macrophage)	0.734341	5.63694	5.67342	0.00129542	0.0104843	-0.871603	6.11581	5.89242	5.15975	5.3798
16990083	NM_080670	SLC35A4	solute carrier family 35, member A4	-0.530757	9.81064	-5.67043	0.00129896	0.0105044	-0.874622	9.52139	9.56914	10.0837	10.0684
16706463	NM_020338	ZMIZ1	zinc finger, MIZ-type containing 1	0.554917	7.93583	5.66728	0.00130269	0.0105207	-0.877794	8.23997	8.18661	7.60945	7.70729
16991460	NM_001099293	KIF4B	kinesin family member 4B	-0.651911	7.24931	-5.66692	0.00130311	0.0105207	-0.878153	7.03294	6.81376	7.62023	7.53029
16728994	NM_006591	POLD3	polymerase (DNA-directed), delta 3, accessory subunit	-0.573173	6.47435	-5.66564	0.00130464	0.0105244	-0.879446	6.22107	6.15445	6.69821	6.82366
16913369	NM_080628	TLDC2	TBC/LysM-associated domain containing 2	-0.653964	6.8339	-5.66362	0.00130705	0.0105352	-0.881491	6.39206	6.62178	7.19461	7.12716
16832405	NM_016231	NLK	nemo-like kinase	-0.577549	10.3555	-5.66273	0.0013081	0.0105352	-0.882381	10.046	10.0875	10.7158	10.5728
17017572	NM_181842	ZBTB12	zinc finger and BTB domain containing 12	-0.608597	6.01782	-5.65984	0.00131156	0.0105544	-0.885303	5.62704	5.80001	6.36142	6.28283
16761877	NM_004447	EPS8	epidermal growth factor receptor pathway substrate 8	-0.534936	6.75721	-5.65854	0.00131311	0.0105583	-0.886612	6.46028	6.5192	7.04164	7.00771
16852433	NM_007195	POLI	polymerase (DNA directed) iota	0.538062	5.78753	5.65751	0.00131435	0.0105597	-0.887656	6.03926	6.07387	5.48415	5.55285
16764019	NM_004818	DDX23	DEAD (Asp-Glu-Ala-Asp) box polypeptide 23	-0.530382	7.6431	-5.65493	0.00131745	0.0105736	-0.890263	7.36114	7.39469	7.88699	7.92959
16748449	NM_001099285	PTMA	prothymosin, alpha	-0.735093	7.90914	-5.65428	0.00131823	0.0105736	-0.890913	7.38357	7.69961	8.28411	8.26926
16979638	NM_020337	ANKRD50	ankyrin repeat domain 50	-0.57468	6.85231	-5.64845	0.00132527	0.0106215	-0.896806	6.49982	6.63012	7.17355	7.10575
16702547	NM_001008211	OPTN	optineurin	0.526899	8.36864	5.64506	0.00132939	0.0106459	-0.900241	8.61247	8.65171	8.09539	8.11499
16877968	NM_001253723	DPYSL5	dihydropyrimidinase-like 5	-0.648488	6.72383	-5.6429	0.00133201	0.0106516	-0.902419	6.51682	6.28235	7.06247	7.03367
17114368	NM_019556	MOSPD1	motile sperm domain containing 1	-0.536854	10.0909	-5.64261	0.00133236	0.0106516	-0.902711	9.80875	9.83625	10.3956	10.3231
16919962	NM_001161841	SULF2	sulfatase 2	0.528709	9.68132	5.64181	0.00133334	0.0106516	-0.903524	9.95409	9.93725	9.39206	9.44187
16761778	NM_175054	HIST4H4	histone cluster 4, H4	-0.639601	5.73071	-5.63838	0.00133753	0.0106693	-0.907	5.33545	5.48637	5.96541	6.13562
16879923	NM_000179	MSH6	mutS homolog 6	-0.633951	8.33633	-5.63823	0.00133771	0.0106693	-0.907148	8.05774	7.98097	8.54944	8.75717
16751518	NM_002284	KRT86	keratin 86	1.35104	6.5593	5.63557	0.00134098	0.0106782	-0.909845	7.19718	7.27246	6.26484	5.50273
16949214	NM_021627	SENP2	SUMO1/sentrin/SMT3 specific peptidase 2	-0.564816	7.75327	-5.63555	0.00134099	0.0106782	-0.909857	7.43303	7.50869	8.09085	7.9805
16964584	NM_002448	MSX1	msh homeobox 1	-0.525715	7.11241	-5.6317	0.00134573	0.0107073	-0.913762	6.87103	6.82808	7.38037	7.37016
17103715	NM_001145073	USP27X	ubiquitin specific peptidase 27, X-linked	0.834537	5.48233	5.62906	0.00134899	0.0107247	-0.91644	5.79609	6.00311	4.89322	5.23691
17024198	NM_020464	NHSL1	NHS-like 1	0.595457	7.04733	5.62228	0.00135739	0.0107793	-0.923308	7.26142	7.4287	6.7181	6.7811
16712576	NM_001282786	PRTFDC1	phosphoribosyl transferase domain containing 1	-0.723824	6.54461	-5.62176	0.00135805	0.0107793	-0.923844	6.33568	6.02971	6.88104	6.932
17051965	NM_015135	NUP205	nucleoporin 205kDa	-0.52746	9.11661	-5.61734	0.00136356	0.0108089	-0.928325	8.82543	8.88033	9.38683	9.37386
17010316	NM_001123226	MTO1	mitochondrial tRNA translation optimization 1	0.659511	7.36001	5.61702	0.00136396	0.0108089	-0.92865	7.58863	7.7909	6.95636	7.10414
16735259	NM_016229	CYB5R2	cytochrome b5 reductase 2	0.632058	5.5514	5.60985	0.00137296	0.010827	-0.935928	5.90737	5.82749	5.3394	5.13135
16804559	NM_001113378	FANCI	Fanconi anemia, complementation group I	-0.532577	8.84223	-5.60931	0.00137365	0.010827	-0.936485	8.58882	8.56306	9.14348	9.07356
16873507	NM_001002923	IGFL4	IGF-like family member 4	0.558091	6.45536	5.60832	0.0013749	0.010827	-0.937488	6.7706	6.69822	6.22865	6.12398
16865726	NM_016535	ZNF581	zinc finger protein 581	0.824784	7.42448	5.60803	0.00137527	0.010827	-0.937786	7.94613	7.72761	6.84698	7.17719
16877048	ENST00000419810	HPCAL1	hippocalcin-like 1	0.647764	6.14135	5.60639	0.00137734	0.010827	-0.939453	6.34535	6.58511	5.82046	5.81448
17020044	NM_012288	TRAM2	translocation associated membrane protein 2	-0.637438	8.5814	-5.60609	0.00137772	0.010827	-0.939756	8.1767	8.34866	8.82444	8.97578
17078480	NM_014018	MRPS28	mitochondrial ribosomal protein S28	-0.580773	6.11169	-5.60574	0.00137815	0.010827	-0.940105	5.84387	5.79873	6.32442	6.47973
16766627	NM_001276468	B4GALNT1	beta-1,4-N-acetyl-galactosaminyl transferase 1	-0.676281	6.29575	-5.60552	0.00137843	0.010827	-0.94033	6.03318	5.88204	6.52306	6.74472
16707884	NM_001278524	ZNF518A	zinc finger protein 518A	-0.822038	5.78938	-5.60551	0.00137845	0.010827	-0.940342	5.37984	5.37688	6.00337	6.39743
16742610	NM_001007027	ALG8	ALG8, alpha-1,3-glucosyltransferase	-0.57451	7.82728	-5.60536	0.00137864	0.010827	-0.940497	7.46628	7.61377	8.13494	8.09414
16888578	NM_001252668	GULP1	GULP, engulfment adaptor PTB domain containing 1	0.520517	7.49957	5.60462	0.00137957	0.010827	-0.941246	7.77305	7.74661	7.24614	7.23248
16857315	NM_001201338	SAFB	scaffold attachment factor B	-0.528529	8.62551	-5.6045	0.00137972	0.010827	-0.941365	8.37669	8.34581	8.86174	8.91781
17102512	NM_000950	PRRG1	proline rich Gla (G-carboxyglutamic acid) 1	0.702524	6.71987	5.6039	0.00138049	0.010827	-0.94198	7.03865	7.1036	6.22571	6.51149
16722143	NM_032867	MICALCL	MICAL C-terminal like	0.928342	6.71148	5.59658	0.00138981	0.0108889	-0.949425	7.12298	7.22832	6.0148	6.47982
17071412	NM_003114	SPAG1	sperm associated antigen 1	0.686517	6.10618	5.59597	0.00139059	0.0108889	-0.950044	6.38213	6.51674	5.88518	5.64066
16845794	NM_001264573	KIF18B	kinesin family member 18B	-0.804909	8.87158	-5.59264	0.00139485	0.0108984	-0.953435	8.64293	8.29531	9.19503	9.35303
16849148	NM_052916	RNF157	ring finger protein 157	-0.55808	6.90942	-5.59234	0.00139524	0.0108984	-0.953743	6.67646	6.58429	7.1427	7.23422
16888106	NM_001201480	OSBPL6	oxysterol binding protein-like 6	0.57498	7.42548	5.59189	0.00139582	0.0108984	-0.954199	7.64725	7.77869	7.09629	7.17969
16729557	NM_145018	DDIAS	DNA damage-induced apoptosis suppressor	-0.658699	6.43566	-5.59159	0.00139621	0.0108984	-0.954508	5.99093	6.22168	6.81649	6.71352
16937050	NM_014674	EDEM1	ER degradation enhancer, mannosidase alpha-like 1	0.561591	7.34203	5.58662	0.00140261	0.0109397	-0.959572	7.58025	7.6654	7.11456	7.00791
16795176	NM_182509	ISM2	isthmin 2	-0.765745	6.85347	-5.58272	0.00140765	0.0109704	-0.963544	6.35347	6.58773	7.10582	7.36687
16846226	NM_002146	HOXB3	homeobox B3	0.654602	8.95575	5.58184	0.0014088	0.0109707	-0.964444	9.26616	9.29995	8.50474	8.75216
16803033	NM_001130028	CLK3	CDC-like kinase 3	0.573959	8.49407	5.57994	0.00141127	0.010972	-0.966383	8.83679	8.72532	8.15256	8.26163
16699739	NM_001618	PARP1	poly (ADP-ribose) polymerase 1	-0.537524	9.11729	-5.57949	0.00141186	0.010972	-0.966842	8.8169	8.88014	9.4205	9.35159
16676682	NM_001185156	IL24	interleukin 24	1.33132	5.31597	5.57812	0.00141364	0.010972	-0.968238	5.84643	6.11683	4.29421	5.00642
16900450	NM_020151	STARD7	StAR-related lipid transfer (START) domain containing 7	-0.519761	10.6631	-5.57762	0.00141429	0.010972	-0.968751	10.3871	10.4194	10.9347	10.9114
16864234	NM_001040668	BCL2L12	BCL2-like 12 (proline rich)	-0.556579	7.44112	-5.57745	0.00141452	0.010972	-0.968928	7.10452	7.22114	7.74798	7.69084
16868576	NM_001130823	DNMT1	DNA (cytosine-5-)-methyltransferase 1	-0.520715	9.94375	-5.57626	0.00141607	0.0109754	-0.97014	9.70099	9.6658	10.1901	10.2181
16757806	NM_006253	PRKAB1	protein kinase, AMP-activated, beta 1 non-catalytic subunit	0.548307	6.10231	5.57538	0.00141721	0.0109756	-0.971031	6.36623	6.38669	5.77112	5.88518
17026737	NM_005803	FLOT1	flotillin 1	0.653235	9.48128	5.57451	0.00141836	0.0109759	-0.971928	9.70696	9.90884	9.22772	9.08161
16858941	NM_004843	IL27RA	interleukin 27 receptor, alpha	-0.565881	7.64494	-5.57306	0.00142026	0.010982	-0.973407	7.32185	7.40215	7.98837	7.86739
16941871	NM_018725	IL17RB	interleukin 17 receptor B	-0.75804	6.26694	-5.57043	0.00142371	0.0109918	-0.976095	5.90537	5.87047	6.47401	6.81791
16839769	NR_037928	P2RX5-TAX1BP3	P2RX5-TAX1BP3 readthrough (NMD candidate)	-0.625903	8.19519	-5.5704	0.00142375	0.0109918	-0.976123	7.89704	7.86744	8.61764	8.39864
16845589	NM_001076683	UBTF	upstream binding transcription factor, RNA polymerase I	-0.528831	7.8922	-5.56872	0.00142595	0.0110002	-0.977837	7.62597	7.6296	8.19398	8.11926
17109042	NM_000381	MID1	midline 1	-0.617115	7.25461	-5.56705	0.00142815	0.0110086	-0.979542	6.84697	7.04514	7.52601	7.60034
16927052	NM_001178010	CDC45	cell division cycle 45	-0.667139	7.27516	-5.56194	0.00143491	0.0110443	-0.984763	7.04319	6.83998	7.69338	7.52407
16969558	NM_001136257	SGMS2	sphingomyelin synthase 2	-0.577031	6.49578	-5.56186	0.00143502	0.0110443	-0.98485	6.19027	6.22426	6.70466	6.86393
16849355	NM_001127198	TMC6	transmembrane channel-like 6	0.53643	7.7616	5.55903	0.00143877	0.0110559	-0.987741	8.00833	8.0513	7.45076	7.53601
16924207	NM_006948	HSPA13	heat shock protein 70kDa family, member 13	0.621135	8.70376	5.55748	0.00144083	0.0110559	-0.989324	8.93628	9.09239	8.4688	8.31759
16845349	NM_007294	BRCA1	breast cancer 1, early onset	-0.624627	7.49159	-5.55737	0.00144098	0.0110559	-0.989441	7.06882	7.28974	7.79834	7.80948
16995254	NM_001007527	LMBRD2	LMBR1 domain containing 2	-0.51669	6.7294	-5.55732	0.00144104	0.0110559	-0.989487	6.45907	6.48304	6.97615	6.99934
16877667	ENST00000438630	FKBP1B	FK506 binding protein 1B, 12.6 kDa	0.619057	5.57734	5.55652	0.00144212	0.0110559	-0.990314	5.78238	5.99136	5.29337	5.24225
16753588	NM_001167614	LEMD3	LEM domain containing 3	-0.541311	7.38424	-5.5526	0.00144736	0.0110874	-0.994325	7.158	7.06917	7.68459	7.6252
16665853	NM_001077700	MIER1	mesoderm induction early response 1, transcriptional regulator	-0.517537	7.08285	-5.54917	0.00145195	0.0111113	-0.997832	6.81174	6.83643	7.32468	7.35856
16848784	NM_001242498	MIF4GD	MIF4G domain containing	-0.51437	8.00617	-5.5486	0.00145272	0.0111113	-0.998418	7.73777	7.7602	8.26437	8.26234
16854046	NM_001271989	CEP76	centrosomal protein 76kDa	-0.522244	7.78375	-5.54669	0.00145529	0.0111194	-1.00037	7.5254	7.51985	8.0754	8.01435
16816479	NM_001199022	CCP110	centriolar coiled coil protein 110kDa	-0.599854	7.81634	-5.54573	0.00145659	0.0111194	-1.00136	7.57789	7.45494	8.19148	8.04107
16953165	NM_001031703	ELP6	elongator acetyltransferase complex subunit 6	-0.542877	6.09139	-5.54463	0.00145808	0.0111194	-1.00249	5.80544	5.83446	6.4166	6.30905
16912975	NM_001076552	ACSS2	acyl-CoA synthetase short-chain family member 2	0.542713	7.96019	5.54447	0.00145828	0.0111194	-1.00265	8.20931	8.25379	7.73974	7.63793
16756649	NM_001093	ACACB	acetyl-CoA carboxylase beta	-0.625903	5.72624	-5.54122	0.00146268	0.0111444	-1.00598	5.46714	5.35944	5.94066	6.13773
16958786	ENST00000434178	MGLL	monoglyceride lipase	0.924149	5.87945	5.53923	0.00146539	0.0111514	-1.00803	6.26647	6.41657	5.18899	5.64576
16825592	NM_001197323	HIRIP3	HIRA interacting protein 3	-0.561592	6.2836	-5.53796	0.00146711	0.0111514	-1.00933	5.99086	6.01475	6.63545	6.49334
16770733	NM_015335	MED13L	mediator complex subunit 13-like	0.545435	10.0749	5.53661	0.00146895	0.0111514	-1.01071	10.2888	10.4064	9.8015	9.80285
16711826	NM_001282658	CCDC3	coiled-coil domain containing 3	-0.610302	5.75206	-5.53612	0.00146962	0.0111514	-1.01121	5.34303	5.55078	6.05915	6.05526
16840408	NM_016060	MED31	mediator complex subunit 31	-0.596055	6.54325	-5.5356	0.00147032	0.0111514	-1.01174	6.17494	6.31551	6.77663	6.90592
16983286	NM_007118	TRIO	trio Rho guanine nucleotide exchange factor	0.526116	8.06137	5.5355	0.00147046	0.0111514	-1.01185	8.29258	8.35628	7.81905	7.77758
16794064	NM_001252650	RDH11	retinol dehydrogenase 11 (all-trans/9-cis/11-cis)	0.517816	7.7277	5.53471	0.00147153	0.0111514	-1.01265	8.00859	7.96464	7.47981	7.45778
16744078	NM_002519	NPAT	nuclear protein, ataxia-telangiectasia locus	-0.512159	7.97269	-5.53391	0.00147263	0.0111514	-1.01348	7.72302	7.71019	8.22812	8.22941
16772625	NM_006231	POLE	polymerase (DNA directed), epsilon, catalytic subunit	-0.545436	7.27885	-5.52892	0.00147945	0.0111945	-1.0186	7.06265	6.94962	7.53301	7.57013
16663958	ENST00000372217	KIF2C	kinesin family member 2C	-0.545356	8.74293	-5.52709	0.00148198	0.011205	-1.02048	8.41306	8.52743	8.9989	9.0323
16774112	NM_001286705	UFM1	ubiquitin-fold modifier 1	0.577469	7.96524	5.52154	0.00148963	0.0112542	-1.02618	8.18989	8.31805	7.62131	7.7317
16746927	OTTHUMT00000398625	RP11-253E3.3	novel transcript	-0.681085	6.33282	-5.51829	0.00149414	0.0112731	-1.02953	6.06279	5.92176	6.79605	6.55067
16724178	NM_018389	SLC35C1	solute carrier family 35 (GDP-fucose transporter), member C1	0.510674	7.42076	5.5178	0.00149481	0.0112731	-1.03002	7.67479	7.67741	7.15907	7.17179
16877956	NM_001809	CENPA	centromere protein A	-0.624356	7.93515	-5.51727	0.00149555	0.0112731	-1.03057	7.6847	7.56124	8.15277	8.34188
16904917	NM_024622	FASTKD1	FAST kinase domains 1	-0.672417	7.09697	-5.51473	0.00149909	0.0112912	-1.03319	6.83116	6.69036	7.31497	7.55138
16701540	NM_032752	ZNF496	zinc finger protein 496	0.512958	6.79787	5.50891	0.00150723	0.0113438	-1.03918	7.07318	7.03552	6.54023	6.54255
17027618	NR_039783	MIR4640	microRNA 4640	0.530899	7.07149	5.50243	0.00151634	0.0114037	-1.04585	7.30904	7.36485	6.84468	6.76741
17088916	NM_004789	LHX2	LIM homeobox 2	-0.613062	6.27223	-5.50046	0.00151912	0.011416	-1.04788	5.95525	5.97615	6.68597	6.47156
16751464	NM_001098673	ATG101	autophagy related 101	0.584557	7.45711	5.49478	0.00152719	0.0114631	-1.05374	7.81162	7.68716	7.09837	7.2313
16815090	NM_001761	CCNF	cyclin F	-0.644846	8.31417	-5.4934	0.00152916	0.0114631	-1.05517	8.01178	7.97171	8.51303	8.76015
16785606	NM_001256550	MPP5	membrane protein, palmitoylated 5 (MAGUK p55 subfamily member 5)	-0.511563	8.63957	-5.49303	0.00152968	0.0114631	-1.05554	8.39158	8.37599	8.91278	8.87792
16967614	NM_000788	DCK	deoxycytidine kinase	-0.723016	7.00831	-5.49278	0.00153003	0.0114631	-1.0558	6.75657	6.53703	7.48919	7.25045
16743111	NM_001114173	CTSC	cathepsin C	-0.571586	7.00619	-5.48975	0.00153436	0.0114868	-1.05893	6.66956	6.77123	7.22658	7.35738
17118478	NR_038327	TEKT4P2	tektin 4 pseudogene 2	0.520518	6.84962	5.4883	0.00153645	0.0114937	-1.06043	7.10934	7.11043	6.62582	6.55292
17085366	OTTHUMT00000037007	RP11-374M1.2	putative novel transcript	0.526225	6.33223	5.48553	0.00154041	0.0115051	-1.06328	6.63891	6.55177	6.07638	6.06185
17088589	NM_007018	CNTRL	centriolin	-0.524369	6.29752	-5.48514	0.00154097	0.0115051	-1.06368	5.99519	6.07548	6.5475	6.57191
16885028	NM_001105198	TMEM177	transmembrane protein 177	-0.516079	7.37109	-5.4848	0.00154146	0.0115051	-1.06403	7.08354	7.14255	7.62328	7.63498
17086353	NM_024945	RMI1	RecQ mediated genome instability 1	-0.618355	7.75093	-5.48058	0.00154755	0.0115418	-1.06839	7.48374	7.39976	8.16383	7.95638
17001299	NM_001197294	DPYSL3	dihydropyrimidinase-like 3	-0.52504	5.94598	-5.47629	0.00155376	0.0115649	-1.07283	5.72571	5.64122	6.22012	6.19688
16922495	NM_001236	CBR3	carbonyl reductase 3	-0.891187	6.4594	-5.4756	0.00155476	0.0115649	-1.07354	5.94046	6.08715	7.12495	6.68503
17044193	XR_428109	LOC101927841	uncharacterized LOC101927841	-0.574109	5.58646	-5.47522	0.00155532	0.0115649	-1.07394	5.25818	5.34062	5.79852	5.9485
17117649	NM_001198532	OXR1	oxidation resistance 1	-0.655928	9.70877	-5.47521	0.00155533	0.0115649	-1.07394	9.28298	9.47864	10.1251	9.94835
16872131	NM_001145901	SARS2	seryl-tRNA synthetase 2, mitochondrial	-0.612834	7.60843	-5.47363	0.00155763	0.0115725	-1.07558	7.35564	7.24839	7.81964	8.01005
16807879	NM_001286487	TMEM87A	transmembrane protein 87A	-0.609749	8.43395	-5.4729	0.00155869	0.0115725	-1.07633	8.0365	8.22165	8.79362	8.68404
16805684	NM_000693	ALDH1A3	aldehyde dehydrogenase 1 family, member A3	0.586407	6.26182	5.47001	0.00156291	0.0115951	-1.07932	6.60455	6.50551	6.04838	5.88885
17053654	NM_001243351	NUB1	negative regulator of ubiquitin-like proteins 1	0.542168	7.8079	5.46811	0.0015657	0.0116071	-1.0813	8.07811	8.07986	7.4749	7.59873
16708744	NM_017787	WBP1L	WW domain binding protein 1-like	-0.548818	8.48877	-5.46647	0.00156809	0.0116085	-1.08299	8.21578	8.21295	8.69552	8.83084
16686538	NM_001145349	IPP	intracisternal A particle-promoted polypeptide	-0.680047	5.75396	-5.46588	0.00156896	0.0116085	-1.0836	5.54701	5.28086	6.14925	6.03872
16818561	ENST00000516106	RNA5SP406	RNA, 5S ribosomal pseudogene 406	0.533316	5.80422	5.46557	0.00156942	0.0116085	-1.08392	6.11339	6.02836	5.57071	5.50441
17113774	NM_152692	C1GALT1C1	C1GALT1-specific chaperone 1	-0.555984	6.65845	-5.46237	0.00157412	0.0116346	-1.08724	6.37242	6.3885	7.00962	6.86326
16840902	NM_001256834	AURKB	aurora kinase B	-0.546934	10.1433	-5.46147	0.00157545	0.0116357	-1.08817	9.87374	9.86595	10.3504	10.4832
16937505	NM_001018115	FANCD2	Fanconi anemia, complementation group D2	-0.563654	8.10224	-5.45909	0.00157897	0.011653	-1.09064	7.88821	7.75262	8.4256	8.34254
16676277	AF083105	SOX13	SRY (sex determining region Y)-box 13	0.537387	7.76831	5.45732	0.00158159	0.0116565	-1.09247	8.01611	8.0579	7.55435	7.44489
16859281	NM_001291274	HSH2D	hematopoietic SH2 domain containing	0.626436	5.51573	5.45717	0.0015818	0.0116565	-1.09262	5.81039	5.84751	5.31878	5.08624
16691883	ENST00000369175	FAM72C	family with sequence similarity 72, member C	-0.762557	5.15617	-5.45393	0.00158661	0.011679	-1.09598	4.785	4.76478	5.71871	5.35618
16902061	OTTHUMT00000330952	AC017074.2	putative novel transcript	-0.624446	5.45661	-5.45353	0.00158721	0.011679	-1.0964	5.14905	5.13972	5.65203	5.88563
16662134	NM_001135255	RBBP4	retinoblastoma binding protein 4	-0.506015	9.1839	-5.44654	0.00159765	0.011746	-1.10365	8.91691	8.94488	9.44355	9.43026
16817182	NM_016309	LCMT1	leucine carboxyl methyltransferase 1	-0.532182	7.76399	-5.44584	0.0015987	0.011746	-1.10438	7.54735	7.44845	8.00671	8.05345
16772074	NM_001077261	NCOR2	nuclear receptor corepressor 2	0.53044	8.78347	5.4347	0.00161549	0.0118605	-1.11595	9.08151	9.01588	8.47531	8.5612
16859763	NM_006332	IFI30	interferon, gamma-inducible protein 30	-0.552369	9.03229	-5.43325	0.0016177	0.0118637	-1.11746	8.70316	8.80905	9.25803	9.35892
17050645	NM_021908	ST7	suppression of tumorigenicity 7	-0.526023	6.50291	-5.43284	0.00161832	0.0118637	-1.11788	6.22532	6.25448	6.71844	6.81341
16676693	NM_001018053	PFKFB2	6-phosphofructo-2-kinase/fructose-2,6-biphosphatase 2	0.522117	7.93448	5.43075	0.0016215	0.0118782	-1.12006	8.16649	8.22459	7.70848	7.63837
16995938	NM_198566	C5orf34	chromosome 5 open reading frame 34	-0.517436	6.21732	-5.4279	0.00162585	0.0119012	-1.12302	5.96833	5.94888	6.43716	6.51493
16829690	NM_001100398	RAP1GAP2	RAP1 GTPase activating protein 2	0.586557	7.78755	5.42564	0.00162931	0.0119142	-1.12537	7.98902	8.17264	7.5254	7.46314
17064810	ENST00000297261	SHH	sonic hedgehog	0.81722	6.79962	5.42517	0.00163004	0.0119142	-1.12587	7.38634	7.03011	6.49422	6.2878
16658758	NM_001105562	UBE4B	ubiquitination factor E4B	-0.638235	9.13672	-5.42405	0.00163176	0.011918	-1.12703	8.70885	8.92637	9.51939	9.39229
16876310	NM_001191005	SRSF10	serine/arginine-rich splicing factor 10	-0.601981	8.44792	-5.42026	0.00163759	0.0119507	-1.13098	8.18742	8.10644	8.65043	8.84739
16809587	NM_016304	RSL24D1	ribosomal L24 domain containing 1	0.521253	8.03216	5.41956	0.00163866	0.0119507	-1.13171	8.25022	8.33535	7.78836	7.7547
16914264	ENST00000342873	WFDC2	WAP four-disulfide core domain 2	0.751501	6.77592	5.41713	0.00164241	0.0119692	-1.13423	7.03347	7.26987	6.53462	6.26572
16741659	NM_001278485	ANAPC15	anaphase promoting complex subunit 15	-0.622158	6.78398	-5.41398	0.0016473	0.011996	-1.13752	6.5281	6.41771	6.99064	7.19948
17079598	NM_001280539	RNF19A	ring finger protein 19A, RBR E3 ubiquitin protein ligase	0.527597	7.16324	5.41316	0.00164857	0.0119964	-1.13838	7.37529	7.47879	6.91223	6.88666
16961037	NR_003001	SCARNA7	small Cajal body-specific RNA 7	0.636492	8.66786	5.41194	0.00165046	0.0120013	-1.13964	8.96327	9.00894	8.2259	8.47332
16839177	NM_001004431	METRNL	meteorin, glial cell differentiation regulator-like	0.525365	6.59787	5.41085	0.00165216	0.0120049	-1.14079	6.89056	6.83055	6.29366	6.37672
16864393	NM_001193646	ATF5	activating transcription factor 5	-0.593726	7.20352	-5.40745	0.00165747	0.0120324	-1.14433	6.81623	6.99708	7.45216	7.5486
16917969	NM_001900	CST5	cystatin D	-0.510952	6.69146	-5.40686	0.00165838	0.0120324	-1.14494	6.42312	6.44885	6.91579	6.97808
16842484	NM_001113434	C17orf51	chromosome 17 open reading frame 51	0.587877	6.99779	5.40466	0.00166183	0.0120486	-1.14724	7.2326	7.35085	6.78343	6.62426
17122462	XM_005275925	LOC101930385	glycosylphosphatidylinositol anchor attachment 1 protein-like	0.553835	9.16814	5.40177	0.00166636	0.0120726	-1.15026	9.51179	9.37832	8.85351	8.92893
17117110	BC064619	CD24	CD24 molecule	0.831841	6.05289	5.39973	0.00166958	0.0120822	-1.15239	6.28289	6.65473	5.74152	5.53242
16769569	NM_014840	NUAK1	NUAK family, SNF1-like kinase, 1	0.526173	7.31594	5.39937	0.00167013	0.0120822	-1.15276	7.56766	7.59039	7.00086	7.10485
16694689	NM_006617	NES	nestin	-0.620238	8.12165	-5.3978	0.00167262	0.0120884	-1.1544	7.69358	7.92949	8.42648	8.43707
16780993	NR_046583	COL4A2-AS1	COL4A2 antisense RNA 1	-1.30131	6.38843	-5.39653	0.00167462	0.0120884	-1.15573	5.35227	6.12328	7.04449	7.03369
16964000	NM_006342	TACC3	transforming, acidic coiled-coil containing protein 3	-0.663846	7.59477	-5.3965	0.00167467	0.0120884	-1.15576	7.21118	7.31451	7.7961	8.05728
16796048	NM_004545	NDUFB1	NADH dehydrogenase (ubiquinone) 1 beta subcomplex, 1, 7kDa	-0.498926	7.64975	-5.39215	0.00168157	0.0121284	-1.16031	7.40061	7.39996	7.90467	7.89375
16702443	NM_153256	PROSER2	proline and serine rich 2	0.570943	7.36753	5.39146	0.00168266	0.0121284	-1.16103	7.72568	7.58031	7.13399	7.03012
17096188	NM_007001	SLC35D2	solute carrier family 35 (UDP-GlcNAc/UDP-glucose transporter), member D2	0.535981	8.62885	5.38234	0.00169722	0.0122245	-1.17057	8.85984	8.93383	8.41303	8.30868
16813854	OTTHUMT00000416700	RP11-66B24.4	novel transcript, antisense to LRRK1 and ALDH1A3	0.514332	6.18726	5.3804	0.00170034	0.012238	-1.1726	6.4035	6.48535	5.93922	5.92097
16740342	NM_032431	SYVN1	synovial apoptosis inhibitor 1, synoviolin	0.52098	8.5374	5.3795	0.0017018	0.0122396	-1.17355	8.75017	8.84561	8.29116	8.26267
17125858	NM_018017	CCDC186	coiled-coil domain containing 186	0.566624	9.22926	5.36856	0.00171952	0.012358	-1.18501	9.54196	9.4832	9.02898	8.86292
16850154	NM_198082	CCDC57	coiled-coil domain containing 57	0.723777	6.20885	5.36676	0.00172245	0.0123701	-1.18689	6.45784	6.68363	5.71994	5.97398
16855184	NM_006111	ACAA2	acetyl-CoA acyltransferase 2	-0.547274	7.72082	-5.36484	0.00172558	0.0123836	-1.18891	7.37275	7.52161	7.99013	7.99878
17106080	NM_052936	ATG4A	autophagy related 4A, cysteine peptidase	-0.640292	7.11445	-5.36278	0.00172897	0.0123903	-1.19107	6.66973	6.91888	7.4743	7.3949
17099549	ENST00000485978	SLC2A6	solute carrier family 2 (facilitated glucose transporter), member 6	0.498428	7.9869	5.36274	0.00172903	0.0123903	-1.19111	8.22688	8.24534	7.75092	7.72445
16870925	ENST00000418100	ZNF724P	zinc finger protein 724, pseudogene	-0.703129	5.45662	-5.36043	0.00173282	0.0124085	-1.19354	5.20945	5.00066	5.68555	5.93081
16866849	NM_017572	MKNK2	MAP kinase interacting serine/threonine kinase 2	0.506346	8.75699	5.35906	0.00173507	0.0124156	-1.19498	9.00721	9.01312	8.47039	8.53725
17072638	OTTHUMT00000381544	RP11-103H7.5	novel transcript	0.847403	5.99885	5.35469	0.00174229	0.0124582	-1.19957	6.53949	6.30561	5.38606	5.76424
16705493	NM_015634	KIAA1279	KIAA1279	-0.521005	8.17297	-5.35192	0.00174687	0.012482	-1.20247	7.86678	7.95815	8.40728	8.45966
17016451	NM_021058	HIST1H2BJ	histone cluster 1, H2bj	-1.01249	5.45935	-5.35004	0.00174999	0.012492	-1.20445	4.94913	4.95707	5.67977	6.25142
16985599	NM_031966	CCNB1	cyclin B1	-0.647375	8.69072	-5.34791	0.00175354	0.012492	-1.20669	8.27261	8.46146	9.11122	8.9176
17105018	NM_000052	ATP7A	ATPase, Cu++ transporting, alpha polypeptide	-0.934364	5.76684	-5.34687	0.00175528	0.012492	-1.20779	5.06241	5.53689	6.33205	6.13599
16690566	NM_001205228	SORT1	sortilin 1	-0.506238	9.91527	-5.34654	0.00175582	0.012492	-1.20813	9.65948	9.66482	10.2035	10.1333
17120318	OTTHUMT00000037960	RP6-206I17.1	novel transcript	0.606631	7.97574	5.34624	0.00175632	0.012492	-1.20844	8.16606	8.39205	7.68623	7.65862
16937943	NM_001134367	SLC6A6	solute carrier family 6 (neurotransmitter transporter), member 6	-0.495408	9.17346	-5.34618	0.00175642	0.012492	-1.20851	8.92186	8.92966	9.4307	9.41162
16840732	NM_000546	TP53	tumor protein p53	0.529766	10.1212	5.34552	0.00175752	0.012492	-1.2092	10.3244	10.4478	9.85438	9.8583
17012163	ENST00000363062	RNU1-18P	RNA, U1 small nuclear 18, pseudogene	0.588929	5.57183	5.345	0.00175839	0.012492	-1.20975	5.83251	5.90008	5.17932	5.37542
16824481	NM_015092	SMG1	SMG1 phosphatidylinositol 3-kinase-related kinase	0.499444	9.98921	5.34315	0.00176149	0.0124984	-1.2117	10.223	10.2548	9.75693	9.72204
16678501	NM_001010858	RNF187	ring finger protein 187	0.507704	8.05195	5.34296	0.00176181	0.0124984	-1.2119	8.34194	8.26966	7.80934	7.78685
17058557	NM_001165903	STX1A	syntaxin 1A (brain)	0.508401	6.38055	5.33925	0.00176803	0.0125201	-1.2158	6.63623	6.63326	6.08708	6.16561
16911394	NM_022096	ANKEF1	ankyrin repeat and EF-hand domain containing 1	-0.578613	6.36292	-5.33867	0.00176901	0.0125201	-1.21641	5.97819	6.16903	6.63053	6.67391
17049965	NM_002803	PSMC2	proteasome (prosome, macropain) 26S subunit, ATPase, 2	-0.509143	10.6536	-5.33805	0.00177005	0.0125201	-1.21706	10.3591	10.4389	10.9147	10.9016
16746174	NM_014155	ZBTB44	zinc finger and BTB domain containing 44	-0.499876	9.46312	-5.33799	0.00177016	0.0125201	-1.21713	9.2032	9.22317	9.68954	9.73658
16821330	NM_002661	PLCG2	phospholipase C, gamma 2 (phosphatidylinositol-specific)	0.520775	7.22365	5.33732	0.00177129	0.0125201	-1.21784	7.51755	7.45052	7.00546	6.92107
16745525	NM_006597	HSPA8	heat shock 70kDa protein 8	-0.511375	11.5612	-5.33661	0.00177248	0.0125201	-1.21858	11.3137	11.2974	11.7742	11.8596
16800156	NM_024956	TMEM62	transmembrane protein 62	-0.557141	6.77887	-5.33334	0.001778	0.0125502	-1.22202	6.45031	6.55028	6.98978	7.1251
16723858	NM_018259	TTC17	tetratricopeptide repeat domain 17	0.522022	8.25737	5.33176	0.00178068	0.0125595	-1.22369	8.50983	8.52693	7.94134	8.05138
17007543	NM_002224	ITPR3	inositol 1,4,5-trisphosphate receptor, type 3	0.540372	10.0599	5.33073	0.00178242	0.0125595	-1.22477	10.3307	10.3295	9.71784	9.86161
16712373	NM_001173484	NEBL	nebulette	0.510733	7.21434	5.32968	0.00178421	0.0125595	-1.22588	7.46145	7.47796	6.91626	7.00168
17126264	ENST00000387405	MT-TC	mitochondrially encoded tRNA cysteine	0.66412	6.92446	5.32907	0.00178524	0.0125595	-1.22652	7.23959	7.27344	6.44877	6.73603
16919265	NM_015035	ZHX3	zinc fingers and homeoboxes 3	-0.499016	6.1538	-5.32882	0.00178568	0.0125595	-1.22679	5.88829	5.92029	6.38338	6.42323
16847455	NM_020748	INTS2	integrator complex subunit 2	-0.514352	8.91789	-5.3236	0.00179457	0.0126131	-1.23229	8.61254	8.70889	9.18029	9.16984
16941493	NM_016483	PHF7	PHD finger protein 7	-0.550502	5.75833	-5.32015	0.0018005	0.0126457	-1.23594	5.50071	5.46546	5.95516	6.11201
16679860	NM_182905	WASH1	WAS protein family homolog 1	0.569299	9.53075	5.3188	0.00180281	0.012653	-1.23736	9.8679	9.76291	9.16896	9.32325
16708312	NM_001136123	FAM178A	family with sequence similarity 178, member A	-0.493926	7.12297	-5.31736	0.00180528	0.0126613	-1.23887	6.86665	6.88537	7.38189	7.35798
16689098	NM_001170670	ZNHIT6	zinc finger, HIT-type containing 6	0.501081	6.18023	5.31498	0.00180939	0.0126811	-1.24139	6.43636	6.42518	5.89842	5.96096
17096546	NM_033087	ALG2	ALG2, alpha-1,3/1,6-mannosyltransferase	0.512214	8.51559	5.31356	0.00181184	0.0126893	-1.24289	8.73789	8.8055	8.22664	8.29231
16705356	NM_012207	HNRNPH3	heterogeneous nuclear ribonucleoprotein H3 (2H9)	-0.497575	8.13031	-5.31233	0.00181397	0.0126949	-1.24419	7.90556	7.85749	8.38837	8.36982
17055216	NM_001136020	ICA1	islet cell autoantigen 1, 69kDa	0.49721	5.67122	5.31162	0.0018152	0.0126949	-1.24494	5.94494	5.89471	5.42391	5.42132
17050202	NM_001270419	DUS4L	dihydrouridine synthase 4-like (S. cerevisiae)	0.612592	7.13808	5.30924	0.00181934	0.0127148	-1.24746	7.55718	7.33158	6.87112	6.79245
17115271	NM_000425	L1CAM	L1 cell adhesion molecule	0.559257	9.75109	5.30593	0.00182509	0.012746	-1.25095	10.0347	10.0267	9.38399	9.55893
16795047	NM_024496	IRF2BPL	interferon regulatory factor 2 binding protein-like	0.572869	7.90444	5.30368	0.00182902	0.0127644	-1.25333	8.18247	8.19929	7.52175	7.71427
17066791	NM_001160036	RHOBTB2	Rho-related BTB domain containing 2	-0.529841	6.356	-5.30271	0.00183072	0.0127673	-1.25436	6.0984	6.08375	6.55581	6.68603
16855026	NM_004671	PIAS2	protein inhibitor of activated STAT, 2	-0.531354	7.35477	-5.30113	0.00183348	0.0127775	-1.25603	7.0349	7.14328	7.65975	7.58113
16959148	NR_110229	ASTE1	asteroid homolog 1 (Drosophila)	-0.543324	5.84906	-5.29955	0.00183625	0.0127877	-1.25769	5.64855	5.50624	6.09226	6.14917
16963876	NM_001004356	FGFRL1	fibroblast growth factor receptor-like 1	0.52115	6.50584	5.29631	0.00184196	0.0128185	-1.26113	6.75277	6.78005	6.30186	6.18867
16700806	NM_000081	LYST	lysosomal trafficking regulator	0.557041	5.89881	5.2954	0.00184355	0.0128206	-1.26209	6.10758	6.24708	5.67195	5.56862
16872443	NM_013376	SERTAD1	SERTA domain containing 1	-0.603161	7.37053	-5.29168	0.00185013	0.0128504	-1.26603	7.05296	7.08493	7.55786	7.78636
16961475	NM_020390	EIF5A2	eukaryotic translation initiation factor 5A2	-0.497796	9.52131	-5.29127	0.00185085	0.0128504	-1.26646	9.25796	9.28687	9.79644	9.74398
17047112	NM_003388	CLIP2	CAP-GLY domain containing linker protein 2	0.545413	8.42483	5.29077	0.00185175	0.0128504	-1.267	8.76496	8.63011	8.1112	8.19305
16925057	NM_001160302	SYNJ1	synaptojanin 1	-0.654794	7.24618	-5.28668	0.00185901	0.0128918	-1.27133	6.78207	7.05549	7.61429	7.53286
16777044	NM_001164145	CHAMP1	chromosome alignment maintaining phosphoprotein 1	-0.60923	7.51627	-5.28154	0.00186819	0.0129463	-1.27678	7.09237	7.33094	7.82537	7.8164
17081706	ENST00000560295	CASC7	cancer susceptibility candidate 7 (non-protein coding)	0.532729	8.24749	5.27959	0.00187168	0.0129614	-1.27885	8.54781	8.47989	7.92003	8.04221
16692724	NM_001136478	ANP32E	acidic (leucine-rich) nuclear phosphoprotein 32 family, member E	-0.811903	7.34329	-5.27882	0.00187307	0.0129619	-1.27966	6.72666	7.14802	7.77895	7.71953
16685748	NM_017646	TRIT1	tRNA isopentenyltransferase 1	0.552104	7.42525	5.27421	0.00188137	0.0130103	-1.28456	7.6191	7.7835	7.12784	7.17055
16741969	NM_003355	UCP2	uncoupling protein 2 (mitochondrial, proton carrier)	-0.59471	7.06847	-5.2718	0.00188572	0.0130312	-1.28711	6.84624	6.69599	7.44869	7.28295
16903771	NM_000726	CACNB4	calcium channel, voltage-dependent, beta 4 subunit	0.724393	5.88746	5.26833	0.001892	0.0130655	-1.2908	6.36082	6.13849	5.66192	5.3886
16990572	NM_152550	SH3RF2	SH3 domain containing ring finger 2	0.497972	7.29408	5.26511	0.00189787	0.0130969	-1.29422	7.52081	7.56531	7.01892	7.07126
16955937	ENST00000384032	RNU6-787P	RNA, U6 small nuclear 787, pseudogene	0.615345	6.39744	5.26198	0.00190359	0.0131272	-1.29755	6.69467	6.71555	6.21325	5.96628
16939960	NM_020242	KIF15	kinesin family member 15	-0.821967	7.38862	-5.25858	0.00190982	0.0131537	-1.30117	6.84326	7.11202	7.97148	7.62774
16741423	ENST00000524987	ANO1-AS1	ANO1 antisense RNA 1	0.664977	9.4864	5.25843	0.00191009	0.0131537	-1.30133	9.67	9.96777	9.16538	9.14244
16964200	NM_001145855	SH3BP2	SH3-domain binding protein 2	0.555049	6.47762	5.25109	0.00192362	0.0132361	-1.30913	6.80833	6.70196	6.271	6.12919
17114585	NM_001139498	FGF13	fibroblast growth factor 13	1.08433	5.80147	5.25003	0.00192559	0.0132361	-1.31027	6.19992	6.48736	4.97371	5.5449
16691621	NM_001080470	ZNF697	zinc finger protein 697	0.582418	5.78012	5.24915	0.00192722	0.0132361	-1.31121	5.98826	6.15439	5.55499	5.42282
16733230	XM_006718879	FOXRED1	FAD-dependent oxidoreductase domain containing 1	0.490576	6.49407	5.24903	0.00192744	0.0132361	-1.31133	6.72495	6.75377	6.26727	6.23029
16735545	NM_020645	NRIP3	nuclear receptor interacting protein 3	-0.548434	5.88013	-5.24808	0.0019292	0.0132361	-1.31234	5.52644	5.68539	6.12634	6.18236
16881246	ENST00000489309	NAGK	N-acetylglucosamine kinase	-0.498868	5.86119	-5.2476	0.0019301	0.0132361	-1.31285	5.64242	5.58108	6.08791	6.13333
16884187	NM_001099289	SH3RF3	SH3 domain containing ring finger 3	0.862206	6.67937	5.24492	0.00193507	0.013248	-1.31571	6.91789	7.30306	6.11309	6.38345
16760668	NM_005768	LPCAT3	lysophosphatidylcholine acyltransferase 3	-0.499912	9.69942	-5.24446	0.00193594	0.013248	-1.3162	9.41286	9.48608	9.93318	9.96558
16769159	NM_024312	GNPTAB	N-acetylglucosamine-1-phosphate transferase, alpha and beta subunits	-0.553009	6.90951	-5.24387	0.00193704	0.013248	-1.31683	6.64258	6.62343	7.27325	7.09877
16772039	OTTHUMT00000400764	RP11-338K17.8	novel transcript	-0.511588	5.40404	-5.24379	0.00193719	0.013248	-1.31692	5.20126	5.09522	5.66908	5.65057
16822035	NM_001128141	DPEP1	dipeptidase 1 (renal)	-0.638051	6.01476	-5.2424	0.00193979	0.0132513	-1.3184	5.73997	5.6515	6.46344	6.20413
16871698	NM_153257	ZNF461	zinc finger protein 461	0.500745	5.59696	5.24196	0.00194061	0.0132513	-1.31887	5.80587	5.8888	5.34647	5.34672
17011683	NM_138408	GTF3C6	general transcription factor IIIC, polypeptide 6, alpha 35kDa	-0.545614	6.3503	-5.24137	0.0019417	0.0132513	-1.31949	6.08128	6.07371	6.70577	6.54045
16826230	NM_001201477	NETO2	neuropilin (NRP) and tolloid (TLL)-like 2	-0.584956	8.81215	-5.23786	0.0019483	0.0132723	-1.32324	8.41279	8.62655	9.08654	9.12271
16886564	NM_052905	FMNL2	formin-like 2	0.490636	7.70884	5.23762	0.00194873	0.0132723	-1.32349	7.94045	7.96786	7.48548	7.44156
16668002	NM_001010883	FAM102B	family with sequence similarity 102, member B	-0.529312	7.23512	-5.23747	0.00194902	0.0132723	-1.32365	6.93868	7.00226	7.56279	7.43677
16835374	NM_003204	NFE2L1	nuclear factor, erythroid 2-like 1	0.528004	10.0733	5.23654	0.00195077	0.0132723	-1.32464	10.3992	10.2754	9.77745	9.84115
16715361	NM_000917	P4HA1	prolyl 4-hydroxylase, alpha polypeptide I	-0.500581	7.83894	-5.23468	0.00195428	0.0132723	-1.32663	7.54888	7.62843	8.10322	8.07525
16699112	NM_001042549	NSL1	NSL1, MIS12 kinetochore complex component	-0.486879	7.48515	-5.2345	0.0019546	0.0132723	-1.32682	7.24056	7.24285	7.74586	7.71131
16673617	NM_001146039	GORAB	golgin, RAB6-interacting	0.622211	5.36428	5.23442	0.00195476	0.0132723	-1.3269	5.77601	5.57476	4.97197	5.13437
16990985	NM_001172698	PPARGC1B	peroxisome proliferator-activated receptor gamma, coactivator 1 beta	0.489298	5.45724	5.23402	0.00195552	0.0132723	-1.32734	5.67918	5.7246	5.20574	5.21945
17096285	NM_001201575	CTSV	cathepsin V	-0.499875	7.18666	-5.2333	0.00195688	0.0132724	-1.3281	6.97288	6.90058	7.4568	7.4164
16710245	NM_001609	ACADSB	acyl-CoA dehydrogenase, short/branched chain	-0.489816	6.26795	-5.22826	0.00196641	0.0133279	-1.33348	6.03606	6.01002	6.49035	6.53537
16944724	NM_032839	DIRC2	disrupted in renal carcinoma 2	-0.492109	8.729	-5.22726	0.00196831	0.0133316	-1.33455	8.5131	8.45279	8.97018	8.97993
16810503	NM_001289108	FAM96A	family with sequence similarity 96, member A	-0.550422	5.89989	-5.22648	0.00196979	0.0133325	-1.33538	5.63261	5.61674	6.26198	6.08822
16949062	NM_004443	EPHB3	EPH receptor B3	-0.490059	6.51813	-5.22152	0.00197926	0.0133746	-1.34069	6.24802	6.29818	6.77505	6.75127
16922114	NM_014586	HUNK	hormonally up-regulated Neu-associated kinase	-0.579295	7.58796	-5.22086	0.00198051	0.0133746	-1.34139	7.28376	7.31288	7.98276	7.77246
16868619	NM_004230	S1PR2	sphingosine-1-phosphate receptor 2	0.58201	7.11701	5.22029	0.0019816	0.0133746	-1.342	7.48011	7.33592	6.74584	6.90617
17096054	NM_000136	FANCC	Fanconi anemia, complementation group C	-0.531996	7.4131	-5.22026	0.00198167	0.0133746	-1.34203	7.17883	7.11538	7.61209	7.74611
16669255	NM_006699	MAN1A2	mannosidase, alpha, class 1A, member 2	-0.530118	8.50975	-5.21968	0.00198278	0.0133746	-1.34266	8.2848	8.20458	8.83544	8.71418
16743328	ENST00000393259	TAF1D	TATA box binding protein (TBP)-associated factor, RNA polymerase I, D, 41kDa	0.495103	9.31383	5.21796	0.00198608	0.0133878	-1.3445	9.59517	9.52759	9.08082	9.05173
16947556	NM_001002800	SMC4	structural maintenance of chromosomes 4	-0.551781	9.45404	-5.21638	0.00198911	0.013399	-1.34618	9.10259	9.25371	9.77679	9.68307
16660652	ENST00000516769	RNU6-135P	RNA, U6 small nuclear 135, pseudogene	-0.586325	5.88279	-5.21328	0.00199508	0.0134301	-1.3495	5.49488	5.68436	6.11846	6.23343
16911463	NM_014962	BTBD3	BTB (POZ) domain containing 3	0.530404	6.15457	5.21199	0.00199758	0.0134378	-1.35088	6.4742	6.36534	5.93883	5.83991
16728439	OTTHUMT00000394256	RP11-660L16.2	novel transcript	0.573101	5.97825	5.2102	0.00200103	0.0134479	-1.35279	6.17853	6.35107	5.74818	5.63522
16960517	NM_005067	SIAH2	siah E3 ubiquitin protein ligase 2	0.509837	8.04207	5.2098	0.00200181	0.0134479	-1.35323	8.35159	8.24238	7.79671	7.7776
17072552	NM_003129	SQLE	squalene epoxidase	0.488406	8.90583	5.20873	0.00200387	0.0134526	-1.35437	9.12644	9.17362	8.67447	8.64878
16828344	NM_152649	MLKL	mixed lineage kinase domain-like	-0.63531	7.1925	-5.20577	0.00200962	0.0134751	-1.35753	6.74799	7.00169	7.45614	7.56416
16987361	NM_198150	ARSK	arylsulfatase family, member K	-0.506571	5.84164	-5.2056	0.00200995	0.0134751	-1.35772	5.63701	5.5397	6.07532	6.11453
16887866	NM_001193528	SCRN3	secernin 3	-0.502417	6.07776	-5.20429	0.00201251	0.0134832	-1.35913	5.82385	5.82925	6.28106	6.37688
16672006	NM_001199653	PMF1	polyamine-modulated factor 1	-0.5082	5.6804	-5.20327	0.0020145	0.0134874	-1.36022	5.39357	5.45903	5.89104	5.97797
16887179	NM_001256126	CERS6	ceramide synthase 6	-0.502705	9.6281	-5.19879	0.00202326	0.0135368	-1.36502	9.42043	9.33307	9.90149	9.85742
16861647	NM_004823	KCNK6	potassium channel, subfamily K, member 6	0.548298	7.13022	5.1971	0.00202658	0.0135498	-1.36683	7.48432	7.32441	6.81951	6.89263
16850998	NM_001142339	GNAL	guanine nucleotide binding protein (G protein), alpha activating activity polypeptide, olfactory type	-0.619176	6.87571	-5.19472	0.00203126	0.0135693	-1.36938	6.69318	6.43906	7.21367	7.15692
17100695	ENST00000387416	MT-TS1	mitochondrially encoded tRNA serine 1 (UCN)	0.837955	7.25135	5.19389	0.0020329	0.0135693	-1.37028	7.66608	7.67457	6.60354	7.0612
16677407	ENST00000415093	SMYD2	SET and MYND domain containing 2	-0.485465	8.55303	-5.19352	0.00203361	0.0135693	-1.37067	8.30178	8.31881	8.81779	8.77373
16870821	NM_173531	ZNF100	zinc finger protein 100	-0.492146	6.46834	-5.18954	0.00204149	0.0136037	-1.37495	6.22574	6.2188	6.75065	6.67818
16873357	NM_001193268	EML2	echinoderm microtubule associated protein like 2	0.59833	7.16045	5.18953	0.00204152	0.0136037	-1.37496	7.40573	7.51349	6.75495	6.96762
16698049	NM_006618	KDM5B	lysine (K)-specific demethylase 5B	0.487949	7.83141	5.18846	0.00204363	0.0136086	-1.3761	8.10367	8.0471	7.59626	7.57861
16687618	NM_014762	DHCR24	24-dehydrocholesterol reductase	-0.485716	11.0212	-5.18504	0.00205043	0.0136447	-1.37978	10.7757	10.781	11.2383	11.2899
16782385	NM_005794	DHRS2	dehydrogenase/reductase (SDR family) member 2	-0.585258	5.3936	-5.18358	0.00205334	0.0136548	-1.38135	4.98939	5.21256	5.69743	5.67503
16703242	NM_001145373	OTUD1	OTU deubiquitinase 1	0.503549	6.13245	5.18235	0.00205579	0.0136619	-1.38267	6.42648	6.34196	5.851	5.91035
17057946	NM_004577	PSPH	phosphoserine phosphatase	0.513241	8.51947	5.18066	0.00205916	0.0136702	-1.38448	8.76067	8.7915	8.32241	8.20328
16796938	NM_006035	CDC42BPB	CDC42 binding protein kinase beta (DMPK-like)	0.480029	9.2581	5.18018	0.00206013	0.0136702	-1.385	9.50836	9.48787	9.01678	9.0194
16839606	NM_020310	MNT	MAX network transcriptional repressor	0.516975	7.87831	5.17965	0.00206119	0.0136702	-1.38557	8.15745	8.11614	7.55818	7.68147
16693864	NM_006556	PMVK	phosphomevalonate kinase	-0.588814	6.66399	-5.1758	0.00206892	0.0137052	-1.38971	6.39206	6.3471	6.84591	7.07088
17002912	NM_001159651	BOD1	biorientation of chromosomes in cell division 1	0.684161	6.38391	5.17564	0.00206923	0.0137052	-1.38988	6.7373	6.71468	5.87869	6.20496
16909021	NM_001136528	SERPINE2	serpin peptidase inhibitor, clade E (nexin, plasminogen activator inhibitor type 1), member 2	0.607786	5.6108	5.16849	0.00208366	0.0137843	-1.39757	6.0398	5.78959	5.31968	5.29414
17122506	NR_024204	LINC00152	long intergenic non-protein coding RNA 152	-0.536983	10.4608	-5.16834	0.00208397	0.0137843	-1.39773	10.1936	10.191	10.6473	10.8113
16797751	NM_001102610	TUBGCP5	tubulin, gamma complex associated protein 5	-0.570767	6.77733	-5.16611	0.00208849	0.0138019	-1.40013	6.55101	6.43288	6.97631	7.14911
16767734	OTTHUMT00000405775	RP11-114H23.1	novel transcript	0.645408	5.72714	5.16565	0.00208943	0.0138019	-1.40063	5.90618	6.1935	5.42722	5.38164
16829580	NM_002945	RPA1	replication protein A1, 70kDa	-0.484947	9.40806	-5.16477	0.00209122	0.013803	-1.40157	9.14036	9.19081	9.63799	9.66307
16674089	NM_001007214	CACYBP	calcyclin binding protein	-0.502465	6.13672	-5.1642	0.00209238	0.013803	-1.40219	5.83318	5.93779	6.38523	6.39067
17114075	NM_017666	ZNF280C	zinc finger protein 280C	-0.513839	8.6221	-5.16166	0.00209757	0.013828	-1.40493	8.30221	8.42814	8.88936	8.86867
16817537	NM_001014987	LAT	linker for activation of T cells	0.557394	8.49538	5.16042	0.0021001	0.0138354	-1.40626	8.69341	8.85475	8.16349	8.26987
16994329	NR_047669	FAM173B	family with sequence similarity 173, member B	-0.824674	7.31977	-5.15941	0.00210216	0.0138398	-1.40735	6.68709	7.12778	7.78097	7.68324
16698504	NM_001973	ELK4	ELK4, ETS-domain protein (SRF accessory protein 1)	-0.495384	5.58695	-5.15776	0.00210554	0.0138423	-1.40913	5.29616	5.38237	5.82199	5.8473
16738630	ENST00000529915	LPXN	leupaxin	0.533005	5.45984	5.15675	0.00210761	0.0138423	-1.41021	5.65108	5.8016	5.1664	5.22028
16837493	NM_032646	TTYH2	tweety family member 2	0.47821	6.04916	5.15608	0.00210899	0.0138423	-1.41094	6.28167	6.29486	5.79968	5.82044
16663665	NM_014663	KDM4A	lysine (K)-specific demethylase 4A	0.479624	7.78363	5.15608	0.00210899	0.0138423	-1.41094	8.03248	8.0144	7.52891	7.55873
16945357	NM_001006109	HMCES	5-hydroxymethylcytosine (hmC) binding, ES cell-specific	-0.477681	8.13562	-5.15581	0.00210954	0.0138423	-1.41123	7.9029	7.89065	8.36674	8.38217
17062280	NM_005763	AASS	aminoadipate-semialdehyde synthase	-0.546168	7.73436	-5.15506	0.0021111	0.0138433	-1.41204	7.55029	7.37227	7.99794	8.01696
16786278	NM_001201366	DNAL1	dynein, axonemal, light chain 1	0.57972	5.69349	5.15288	0.00211557	0.0138635	-1.41439	5.99217	5.97453	5.51421	5.29305
16764783	OTTHUMT00000405070	RP11-1100L3.7	novel transcript antisense to C12orf44	0.526416	6.89294	5.15208	0.00211724	0.0138652	-1.41526	7.21851	7.09378	6.6718	6.58766
17012767	NM_001253676	TBPL1	TBP-like 1	-0.483777	6.48031	-5.14632	0.00212916	0.013934	-1.42147	6.26642	6.21043	6.71376	6.73064
16744822	NM_001207048	BACE1	beta-site APP-cleaving enzyme 1	-0.561625	7.74442	-5.14165	0.00213888	0.0139883	-1.42651	7.45522	7.47201	7.92494	8.12553
16950989	ENST00000285018	WNT7A	wingless-type MMTV integration site family, member 7A	0.521533	6.45965	5.14018	0.00214196	0.0139993	-1.4281	6.78687	6.65396	6.22731	6.17046
16851344	NM_006938	SNRPD1	small nuclear ribonucleoprotein D1 polypeptide 16kDa	-0.53026	8.96775	-5.13927	0.00214385	0.0140024	-1.42908	8.62683	8.7784	9.25596	9.20979
16791734	NM_015473	HEATR5A	HEAT repeat containing 5A	0.477217	8.33572	5.13788	0.00214678	0.0140122	-1.43059	8.58812	8.56054	8.10315	8.09107
16741690	NM_001258392	CLPB	ClpB caseinolytic peptidase B homolog (E. coli)	-0.579744	7.88736	-5.13552	0.00215174	0.0140353	-1.43314	7.68016	7.51481	8.10154	8.25293
17013784	NM_001286562	C6orf211	chromosome 6 open reading frame 211	-0.549186	7.55767	-5.13335	0.00215629	0.0140557	-1.43548	7.33181	7.23434	7.91163	7.7529
16774669	NM_018283	NUDT15	nudix (nucleoside diphosphate linked moiety X)-type motif 15	-0.590867	7.18075	-5.13178	0.0021596	0.014068	-1.43718	7.0036	6.76703	7.46564	7.48672
16918832	ENST00000374085	NFS1	NFS1 cysteine desulfurase	-0.745297	7.53257	-5.13065	0.00216199	0.0140698	-1.4384	7.29637	7.02348	7.7674	8.04305
16777675	NM_001265	CDX2	caudal type homeobox 2	-0.497665	6.98655	-5.13031	0.00216272	0.0140698	-1.43877	6.76573	6.7097	7.27766	7.19309
16850286	NR_039751	MIR4525	microRNA 4525	-0.59894	7.22548	-5.12494	0.00217411	0.0141345	-1.44458	7.04525	6.80678	7.55793	7.49198
16802771	NM_001252678	BBS4	Bardet-Biedl syndrome 4	-0.583036	6.33067	-5.12354	0.00217709	0.0141447	-1.4461	5.93719	6.1411	6.67496	6.56941
16847621	NM_017647	FTSJ3	FtsJ homolog 3 (E. coli)	-0.567768	9.39916	-5.11731	0.0021904	0.0142218	-1.45284	9.21731	9.01324	9.65384	9.71224
16831313	NR_026880	MGC12916	uncharacterized protein MGC12916	0.555794	6.1696	5.11521	0.00219491	0.0142417	-1.45512	6.54514	6.34986	5.87688	5.90653
17004551	NM_001003698	RREB1	ras responsive element binding protein 1	0.554133	8.40335	5.11325	0.00219913	0.0142597	-1.45724	8.59803	8.76279	8.07353	8.17903
16795304	NM_152446	CEP128	centrosomal protein 128kDa	-0.582264	7.23344	-5.11254	0.00220067	0.0142603	-1.45802	7.05664	6.82798	7.51144	7.5377
16726825	ENST00000533419	CDC42EP2	CDC42 effector protein (Rho GTPase binding) 2	0.699233	6.51333	5.11181	0.00220225	0.0142612	-1.45881	6.70421	7.02168	6.09125	6.23618
16973551	NM_001290079	NKX1-1	NK1 homeobox 1	0.473433	7.04272	5.10893	0.00220846	0.014292	-1.46192	7.28559	7.27329	6.79767	6.81434
16816186	NM_001142469	C16orf45	chromosome 16 open reading frame 45	0.547276	5.38656	5.10664	0.00221343	0.0143148	-1.46441	5.7431	5.57729	5.0691	5.15673
16892869	NM_001042467	MLPH	melanophilin	0.640589	6.21117	5.10236	0.00222275	0.0143582	-1.46907	6.67404	6.38888	5.92666	5.85508
17059660	NM_004912	KRIT1	KRIT1, ankyrin repeat containing	-0.512244	9.08547	-5.10186	0.00222384	0.0143582	-1.46961	8.77379	8.88491	9.38028	9.30291
16914171	NM_002638	PI3	peptidase inhibitor 3, skin-derived	0.668603	6.25839	5.10156	0.00222449	0.0143582	-1.46993	6.47545	6.70994	6.0341	5.81408
17047384	ENST00000393633	NSUN5P1	NOP2/Sun domain family, member 5 pseudogene 1	0.486221	7.887	5.09888	0.00223035	0.0143866	-1.47284	8.13105	8.12916	7.6036	7.68417
16991447	NM_001014990	MRPL22	mitochondrial ribosomal protein L22	-0.54221	5.59135	-5.09646	0.00223566	0.0144115	-1.47547	5.23107	5.40943	5.88091	5.844
17015240	NM_001166010	ECI2	enoyl-CoA delta isomerase 2	-0.526595	6.38838	-5.09072	0.00224829	0.0144835	-1.4817	6.06472	6.18544	6.70456	6.59879
17024020	NM_001077440	BCLAF1	BCL2-associated transcription factor 1	-0.471902	7.56051	-5.0892	0.00225166	0.0144957	-1.48336	7.32233	7.32678	7.80807	7.78485
17123112	OTTHUMT00000276780	AP000525.9	novel transcript	0.657934	5.93325	5.08763	0.00225514	0.0145086	-1.48507	6.23954	6.2849	5.75913	5.44944
17000650	ENST00000507297	TMEM173	transmembrane protein 173	-0.568249	6.66995	-5.08586	0.00225908	0.0145245	-1.487	6.27727	6.49439	6.95437	6.95378
16844585	NM_001165252	KRTAP2-3	keratin associated protein 2-3	0.749909	7.77669	5.08487	0.00226128	0.0145292	-1.48807	7.95352	8.34976	7.41921	7.38426
16698618	NM_001271872	SRGAP2C	SLIT-ROBO Rho GTPase activating protein 2C	0.559308	9.16918	5.08254	0.00226645	0.014553	-1.4906	9.54329	9.35438	8.84778	8.93127
16939534	NM_001098414	ZNF621	zinc finger protein 621	0.472161	7.47725	5.07923	0.00227385	0.0145876	-1.49421	7.69714	7.72952	7.23847	7.24386
16661533	NM_178191	ATPIF1	ATPase inhibitory factor 1	-0.507816	6.00563	-5.07816	0.00227625	0.0145876	-1.49537	5.81391	5.68953	6.28131	6.23776
17119876	ENST00000427998	LOC100288175	uncharacterized LOC100288175	0.514256	6.62816	5.07816	0.00227626	0.0145876	-1.49538	6.85078	6.91979	6.4336	6.30845
16820168	NM_001193522	FAM65A	family with sequence similarity 65, member A	0.498314	8.33256	5.07693	0.00227901	0.0145957	-1.49672	8.62883	8.5346	8.1154	8.0514
17025046	NM_173515	CNKSR3	CNKSR family member 3	0.526405	5.61243	5.07284	0.00228821	0.0146389	-1.50117	5.94831	5.80295	5.38611	5.31234
16851081	XM_005258159	TUBB6	tubulin, beta 6 class V	-0.485357	9.11942	-5.07262	0.00228872	0.0146389	-1.50142	8.86172	8.89176	9.32231	9.40188
16816408	NM_001190983	COQ7	coenzyme Q7 homolog, ubiquinone (yeast)	-0.709764	7.2961	-5.07036	0.0022938	0.0146619	-1.50387	7.06371	6.81873	7.7855	7.51647
16658097	OTTHUMT00000350999	RP3-395M20.7	putative transcript	-0.478509	5.69582	-5.06723	0.00230089	0.0146977	-1.50729	5.45894	5.4542	5.96811	5.90205
16727427	NM_001256670	DPP3	dipeptidyl-peptidase 3	-0.469426	8.48038	-5.06527	0.00230535	0.0147167	-1.50943	8.25437	8.23697	8.72108	8.7091
16719973	OTTHUMT00000384760	RP11-304M2.5	novel transcript	0.482343	7.22874	5.064	0.00230825	0.0147257	-1.51082	7.43217	7.50765	6.99927	6.97586
16663223	NM_173642	RIMKLA	ribosomal modification protein rimK-like family member A	-0.754842	5.55505	-5.06216	0.00231243	0.0147414	-1.51282	4.99693	5.35832	5.84103	6.0239
16989496	NM_000358	TGFBI	transforming growth factor, beta-induced, 68kDa	0.470594	7.84365	5.06161	0.0023137	0.0147414	-1.51343	8.08341	8.07448	7.62439	7.59231
16948021	NM_001258315	ECT2	epithelial cell transforming 2	-0.537773	9.35523	-5.05713	0.00232395	0.0147855	-1.51832	8.99738	9.1753	9.60545	9.64277
16918976	NM_001145315	DSN1	DSN1, MIS12 kinetochore complex component	-0.483216	7.99882	-5.05625	0.00232597	0.0147855	-1.51928	7.77861	7.73582	8.27629	8.20457
16881434	NM_003124	SPR	sepiapterin reductase (7,8-dihydrobiopterin:NADP+ oxidoreductase)	-0.584926	8.51224	-5.05612	0.00232625	0.0147855	-1.51941	8.15874	8.28081	8.70099	8.90841
16799426	NM_001211	BUB1B	BUB1 mitotic checkpoint serine/threonine kinase B	-0.468815	7.65289	-5.05578	0.00232705	0.0147855	-1.51979	7.41071	7.42626	7.87831	7.89628
16925872	NM_001135099	TMPRSS2	transmembrane protease, serine 2	0.572669	5.62761	5.05487	0.00232913	0.0147855	-1.52078	5.83555	5.99233	5.25947	5.42308
16953597	ENST00000489483	SLC26A6	solute carrier family 26 (anion exchanger), member 6	0.615233	6.85966	5.05467	0.00232959	0.0147855	-1.521	7.09918	7.23538	6.43316	6.67093
16889399	NM_001257102	NDUFB3	NADH dehydrogenase (ubiquinone) 1 beta subcomplex, 3, 12kDa	-0.759708	6.46442	-5.05337	0.00233258	0.014795	-1.52242	5.88781	6.28131	6.78599	6.90255
16970611	NM_018078	LARP1B	La ribonucleoprotein domain family, member 1B	0.508734	6.47779	5.05267	0.00233421	0.0147958	-1.52319	6.71746	6.74685	6.29079	6.15606
16935517	AK123479	CENPM	centromere protein M	-0.600016	7.03078	-5.05096	0.00233815	0.0148113	-1.52506	6.7278	6.73375	7.20174	7.45985
16985637	NM_001799	CDK7	cyclin-dependent kinase 7	0.554592	7.81475	5.05027	0.00233974	0.0148119	-1.52581	8.15487	8.02922	7.61848	7.45642
16670383	NM_001040874	HIST2H2AA4	histone cluster 2, H2aa4	-0.553146	11.9759	-5.04856	0.0023437	0.0148274	-1.52768	11.6395	11.7592	12.1702	12.3347
16888232	NM_001278554	UBE2E3	ubiquitin-conjugating enzyme E2E 3	-0.523607	6.28801	-5.04754	0.00234605	0.0148328	-1.52879	5.96384	6.08856	6.60208	6.49753
17013279	NM_003764	STX11	syntaxin 11	0.737519	5.775	5.04548	0.00235085	0.0148536	-1.53105	5.94784	6.33968	5.4014	5.41108
16862439	NM_001278599	AXL	AXL receptor tyrosine kinase	0.469061	10.976	5.04436	0.00235345	0.0148606	-1.53227	11.2066	11.2145	10.725	10.7579
17122594	NM_001178100	CD8B	CD8b molecule	-0.486539	8.02208	-5.04363	0.00235515	0.0148618	-1.53307	7.74148	7.81614	8.23591	8.29479
17064679	NM_005431	XRCC2	X-ray repair complementing defective repair in Chinese hamster cells 2	-0.49936	7.67743	-5.04147	0.00236018	0.0148798	-1.53543	7.39215	7.46336	7.87705	7.97718
16970673	NM_001287439	JADE1	jade family PHD finger 1	-0.585369	6.82112	-5.04112	0.00236102	0.0148798	-1.53582	6.62678	6.43008	7.18528	7.04233
16851134	NM_032142	CEP192	centrosomal protein 192kDa	-0.541789	7.53275	-5.03706	0.00237052	0.0149253	-1.54026	7.19735	7.32636	7.87353	7.73376
16871124	NM_032139	ANKRD27	ankyrin repeat domain 27 (VPS9 domain)	0.470129	8.92065	5.0366	0.0023716	0.0149253	-1.54077	9.17756	9.13386	8.68312	8.68805
16835401	NR_033201	HOXB-AS3	HOXB cluster antisense RNA 3	0.473591	7.7787	5.0361	0.00237277	0.0149253	-1.54132	7.98616	8.04483	7.53813	7.54567
17097941	NM_001190945	TRAF1	TNF receptor-associated factor 1	0.603656	5.62063	5.03243	0.00238142	0.0149553	-1.54534	5.80175	6.04317	5.26473	5.37287
16988510	NM_001278199	SNX2	sorting nexin 2	-0.477457	8.24337	-5.03204	0.00238232	0.0149553	-1.54576	7.98454	8.02474	8.45129	8.5129
17075112	NM_015310	PSD3	pleckstrin and Sec7 domain containing 3	0.529083	5.37038	5.0314	0.00238383	0.0149553	-1.54646	5.55212	5.71773	5.13144	5.08024
16915881	NM_001281482	ARFGAP1	ADP-ribosylation factor GTPase activating protein 1	0.596363	6.90157	5.03087	0.00238509	0.0149553	-1.54704	7.27922	7.12029	6.50254	6.70424
16994161	ENST00000255764	MED10	mediator complex subunit 10	0.550424	8.9591	5.03087	0.00238509	0.0149553	-1.54705	9.13871	9.32992	8.65064	8.71714
16666239	NM_000016	ACADM	acyl-CoA dehydrogenase, C-4 to C-12 straight chain	-0.586667	8.58695	-5.03019	0.0023867	0.0149555	-1.54779	8.33425	8.25298	8.99641	8.76415
17050591	NM_000245	MET	MET proto-oncogene, receptor tyrosine kinase	0.631839	7.0462	5.02957	0.00238815	0.0149555	-1.54846	7.29439	7.42984	6.86098	6.59958
17005157	NM_016255	FAM8A1	family with sequence similarity 8, member A1	-0.549184	7.27686	-5.02699	0.00239428	0.0149844	-1.5513	6.99496	7.00957	7.65188	7.45101
16803134	NM_015492	C15orf39	chromosome 15 open reading frame 39	0.469741	8.02916	5.02527	0.00239837	0.0150005	-1.55319	8.28675	8.2413	7.78782	7.80075
16778433	NM_001145353	ELF1	E74-like factor 1 (ets domain transcription factor)	-0.482635	10.6037	-5.02146	0.00240744	0.0150476	-1.55736	10.4059	10.3189	10.8578	10.8322
16802120	NM_004727	SLC24A1	solute carrier family 24 (sodium/potassium/calcium exchanger), member 1	-0.651271	5.4545	-5.02037	0.00241005	0.0150544	-1.55856	5.02393	5.23379	5.66267	5.89759
16897719	NM_001135597	CCDC88A	coiled-coil domain containing 88A	-0.643189	8.33157	-5.01783	0.00241613	0.0150829	-1.56135	7.85763	8.16232	8.67326	8.63306
17125294	ENST00000423240	HSPB1P1	heat shock 27kDa protein 1 pseudogene 1	-0.482163	12.4909	-5.01636	0.00241967	0.0150877	-1.56297	12.23	12.2696	12.7728	12.6911
16872194	NM_004877	GMFG	glia maturation factor, gamma	-0.480141	7.45056	-5.01623	0.00241996	0.0150877	-1.5631	7.22909	7.19189	7.72914	7.65212
16981345	NM_020870	SH3RF1	SH3 domain containing ring finger 1	0.483373	8.07015	5.01111	0.00243231	0.015146	-1.56873	8.27132	8.35235	7.80366	7.85328
16872551	NM_000660	TGFB1	transforming growth factor, beta 1	-0.513085	9.17439	-5.01057	0.0024336	0.015146	-1.56932	8.86282	8.97288	9.37831	9.48356
16786587	NM_005252	FOS	FBJ murine osteosarcoma viral oncogene homolog	-0.548376	7.08831	-5.00968	0.00243577	0.015146	-1.5703	6.71303	6.91521	7.37037	7.35462
17079220	NM_012415	RAD54B	RAD54 homolog B (S. cerevisiae)	-0.468752	6.77241	-5.0096	0.00243595	0.015146	-1.57038	6.51331	6.56276	7.00697	7.0066
16833449	uc002hmy.1	PIGW	phosphatidylinositol glycan anchor biosynthesis, class W	-0.544224	6.87153	-5.00918	0.00243697	0.015146	-1.57085	6.5566	6.64223	7.05468	7.2326
16804867	NM_001042574	CRTC3	CREB regulated transcription coactivator 3	0.587871	7.38637	5.00833	0.00243902	0.0151492	-1.57178	7.55769	7.80292	7.11752	7.06735
16786616	NM_006399	BATF	basic leucine zipper transcription factor, ATF-like	-0.466662	6.59506	-5.00749	0.00244108	0.0151525	-1.57271	6.34318	6.38028	6.83586	6.82092
16681323	NM_001042681	RERE	arginine-glutamic acid dipeptide (RE) repeats	-0.487121	8.80705	-5.00641	0.0024437	0.0151592	-1.5739	8.59763	8.52935	9.01088	9.09034
16961773	NM_152240	ZMAT3	zinc finger, matrin-type 3	-0.464715	7.80095	-5.0051	0.00244687	0.0151694	-1.57533	7.5553	7.58189	8.02775	8.03887
17009193	NM_001078175	SLC29A1	solute carrier family 29 (equilibrative nucleoside transporter), member 1	-0.585455	8.35807	-5.0039	0.00244979	0.0151779	-1.57665	8.18591	7.94477	8.68011	8.62148
16889762	NM_177538	CYP20A1	cytochrome P450, family 20, subfamily A, polypeptide 1	-0.474235	7.44019	-5.00261	0.00245293	0.0151808	-1.57807	7.16889	7.23726	7.68895	7.66567
16687524	NM_001031672	CYB5RL	cytochrome b5 reductase-like	-0.651163	5.51352	-5.00246	0.00245332	0.0151808	-1.57824	5.05676	5.31911	5.74996	5.92824
16955456	NM_152678	DENND6A	DENN/MADD domain containing 6A	-0.519008	8.30848	-5.00072	0.00245757	0.0151945	-1.58016	8.08799	8.00995	8.63962	8.49635
16873513	AK096622	LOC400706	uncharacterized LOC400706	0.485269	7.38235	5.00029	0.00245861	0.0151945	-1.58062	7.57425	7.67571	7.13475	7.14468
16829037	NM_015144	ZCCHC14	zinc finger, CCHC domain containing 14	-0.489693	9.12445	-4.9991	0.00246152	0.015203	-1.58193	8.82392	8.93529	9.37453	9.36406
16707551	NM_001127182	CEP55	centrosomal protein 55kDa	-0.476302	9.23751	-4.99777	0.00246478	0.0152136	-1.5834	9.03234	8.96637	9.49811	9.45321
17085055	ENST00000377724	DCAF10	DDB1 and CUL4 associated factor 10	0.474875	8.23263	4.99639	0.00246818	0.0152251	-1.58492	8.50037	8.43977	8.01812	7.97227
16861553	NM_144694	ZNF570	zinc finger protein 570	0.497417	6.21039	4.99178	0.00247953	0.0152856	-1.59	6.5038	6.41439	5.91551	6.00785
16742115	NM_001144869	LIPT2	lipoyl(octanoyl) transferase 2 (putative)	-0.520778	6.95248	-4.98864	0.0024873	0.0153239	-1.59346	6.65844	6.72574	7.13606	7.28968
16907156	NM_130906	PPIL3	peptidylprolyl isomerase (cyclophilin)-like 3	-0.510214	5.89965	-4.97874	0.00251196	0.015454	-1.60437	5.70329	5.58578	6.20367	6.10583
17055295	NM_001135924	VWDE	von Willebrand factor D and EGF domains	0.461182	5.86853	4.97854	0.00251246	0.015454	-1.60459	6.09479	6.10344	5.62958	5.64629
16751601	NM_015319	TENC1	tensin like C1 domain containing phosphatase (tensin 2)	-0.505778	7.15817	-4.97796	0.00251393	0.015454	-1.60523	6.85118	6.95937	7.36223	7.45988
17054243	NM_002607	PDGFA	platelet-derived growth factor alpha polypeptide	0.48354	9.95722	4.97766	0.00251468	0.015454	-1.60557	10.2298	10.1682	9.75671	9.67419
17067031	NM_024940	DOCK5	dedicator of cytokinesis 5	0.461445	8.90792	4.9751	0.00252111	0.0154839	-1.60839	9.14181	9.13548	8.68918	8.66522
16821056	NM_153688	ZFP1	ZFP1 zinc finger protein	-0.484189	6.77985	-4.97271	0.00252712	0.0154957	-1.61103	6.48659	6.58892	7.03486	7.00903
17026648	ENST00000412668	HCG18	HLA complex group 18 (non-protein coding)	0.553926	7.49361	4.97256	0.00252751	0.0154957	-1.6112	7.78508	7.75607	7.11011	7.32319
16877463	ENST00000406397	VSNL1	visinin-like 1	0.465774	5.64961	4.9719	0.00252917	0.0154957	-1.61192	5.86524	5.89974	5.39733	5.4361
16917004	NM_019593	GPCPD1	glycerophosphocholine phosphodiesterase GDE1 homolog (S. cerevisiae)	0.486243	7.36513	4.97185	0.0025293	0.0154957	-1.61198	7.60476	7.61175	7.06702	7.17701
17049076	NM_003439	ZKSCAN1	zinc finger with KRAB and SCAN domains 1	0.465312	10.2061	4.96493	0.00254685	0.0155844	-1.61962	10.431	10.4465	9.99862	9.94821
16962493	NM_002916	RFC4	replication factor C (activator 1) 4, 37kDa	-0.528012	8.82722	-4.96489	0.00254694	0.0155844	-1.61966	8.52611	8.60032	9.17424	9.00821
16675844	NM_018085	IPO9	importin 9	-0.472035	9.88989	-4.963	0.00255177	0.0156043	-1.62176	9.65568	9.65206	10.0874	10.1644
16860667	NM_001129994	KCTD15	potassium channel tetramerization domain containing 15	0.559393	7.57131	4.9613	0.00255612	0.0156213	-1.62364	7.75635	7.94566	7.23235	7.35088
17112686	NM_001167970	TRMT2B	tRNA methyltransferase 2 homolog B (S. cerevisiae)	-0.494286	8.17836	-4.95983	0.00255987	0.0156345	-1.62526	7.95986	7.90257	8.48309	8.36792
17070634	NM_003821	RIPK2	receptor-interacting serine-threonine kinase 2	0.530907	7.43811	4.95706	0.00256698	0.0156647	-1.62833	7.64847	7.75867	7.24824	7.09708
16692209	NM_001101663	NBPF11	neuroblastoma breakpoint family, member 11	0.464833	9.22416	4.95662	0.0025681	0.0156647	-1.62881	9.43325	9.4799	9.00534	8.97815
16905355	NM_001002258	ATP5G3	ATP synthase, H+ transporting, mitochondrial Fo complex, subunit C3 (subunit 9)	-0.470608	8.08921	-4.95605	0.00256957	0.0156647	-1.62945	7.8894	7.81842	8.31291	8.33613
16752389	ENST00000356464	RPS26	ribosomal protein S26	-0.662923	7.34508	-4.9542	0.00257433	0.0156795	-1.63149	6.87628	7.15097	7.58079	7.77231
16792381	NM_018353	MIS18BP1	MIS18 binding protein 1	-0.489894	6.99968	-4.95387	0.00257517	0.0156795	-1.63185	6.797	6.71246	7.28813	7.20111
17003291	NM_005451	PDLIM7	PDZ and LIM domain 7 (enigma)	0.513248	7.46638	4.95262	0.00257841	0.0156817	-1.63325	7.65317	7.79285	7.16877	7.25075
16729712	NM_003797	EED	embryonic ectoderm development	-0.610854	7.25601	-4.95189	0.00258028	0.0156817	-1.63405	6.85514	7.04603	7.66569	7.45719
16738774	NM_017840	MRPL16	mitochondrial ribosomal protein L16	-0.490809	7.16572	-4.95189	0.00258029	0.0156817	-1.63405	6.90631	6.93431	7.35097	7.47127
16913341	NM_006097	MYL9	myosin, light chain 9, regulatory	0.50012	9.65443	4.95088	0.00258289	0.0156878	-1.63517	9.83558	9.97341	9.41866	9.39009
16873940	NM_018273	TMEM143	transmembrane protein 143	-0.525701	6.16635	-4.94589	0.00259584	0.0157568	-1.6407	5.96111	5.84589	6.35912	6.49928
17057525	NM_022748	TNS3	tensin 3	-0.541971	7.26279	-4.94412	0.00260046	0.0157752	-1.64266	7.09363	6.88998	7.53791	7.52964
16923842	NM_001848	COL6A1	collagen, type VI, alpha 1	0.637197	7.70476	4.94027	0.0026105	0.0158256	-1.64693	7.87227	8.17444	7.42361	7.34871
16850923	NM_006868	RAB31	RAB31, member RAS oncogene family	0.48212	8.14627	4.93971	0.00261197	0.0158256	-1.64755	8.43769	8.33697	7.92482	7.88561
17126192	NR_003043	SNORD49B	small nucleolar RNA, C/D box 49B	0.488006	7.29519	4.9362	0.00262119	0.0158717	-1.65144	7.54074	7.53765	6.99068	7.1117
16897184	NM_018079	SRBD1	S1 RNA binding domain 1	-0.6053	7.44045	-4.93493	0.00262452	0.0158821	-1.65285	7.07233	7.20326	7.86628	7.61991
16876303	BC085018	PNRC2	proline-rich nuclear receptor coactivator 2	-0.476134	9.36698	-4.9306	0.00263597	0.0159224	-1.65766	9.17702	9.08081	9.60727	9.60283
16777143	NM_001042414	PSPC1	paraspeckle component 1	-0.483437	7.77337	-4.93054	0.00263613	0.0159224	-1.65773	7.58757	7.47574	8.00756	8.02262
16699672	NM_001143962	CAPN8	calpain 8	0.647645	5.72449	4.92971	0.00263832	0.0159224	-1.65865	5.89568	6.20093	5.34771	5.45362
16849992	NM_001184917	PCYT2	phosphate cytidylyltransferase 2, ethanolamine	0.490282	8.33946	4.92937	0.00263923	0.0159224	-1.65903	8.60831	8.5609	8.03552	8.15312
16907130	NM_001162407	CLK1	CDC-like kinase 1	-0.524815	6.58288	-4.92936	0.00263924	0.0159224	-1.65903	6.27103	6.36992	6.76849	6.92209
16887936	ENST00000249501	HOXD10	homeobox D10	-0.542113	6.23519	-4.92819	0.00264234	0.0159314	-1.66033	5.93978	5.98849	6.60646	6.40603
16938296	NR_046723	SGOL1-AS1	SGOL1 antisense RNA 1	-0.754623	5.41329	-4.92221	0.00265827	0.0159966	-1.66698	5.24764	4.82431	5.79369	5.7875
16721393	NM_012192	TIMM10B	translocase of inner mitochondrial membrane 10 homolog B (yeast)	0.455634	9.52984	4.92204	0.00265872	0.0159966	-1.66716	9.75313	9.76219	9.29632	9.30774
17080450	NM_000127	EXT1	exostosin glycosyltransferase 1	0.458459	8.62625	4.92199	0.00265886	0.0159966	-1.66722	8.85458	8.85637	8.37772	8.41631
17105347	ENST00000415585	CSTF2	cleavage stimulation factor, 3 pre-RNA, subunit 2, 64kDa	-0.469131	7.64022	-4.9211	0.00266124	0.0159966	-1.66821	7.44554	7.36576	7.87072	7.87884
16840982	NM_001256012	MYH10	myosin, heavy chain 10, non-muscle	-0.645431	7.20422	-4.9211	0.00266124	0.0159966	-1.66821	6.73563	7.02738	7.5951	7.45878
16683105	NM_001291860	HSPG2	heparan sulfate proteoglycan 2	0.469403	7.61707	4.91877	0.00266749	0.0160244	-1.6708	7.85394	7.84961	7.34162	7.42312
17087508	ENST00000409686	KRT8P11	keratin 8 pseudogene 11	-0.476462	5.5426	-4.91557	0.0026761	0.0160664	-1.67437	5.32816	5.28059	5.82514	5.73653
17066694	NM_021630	PDLIM2	PDZ and LIM domain 2 (mystique)	0.615571	6.30322	4.91477	0.00267825	0.0160665	-1.67526	6.74437	6.47764	6.05544	5.93543
17080408	NM_006265	RAD21	RAD21 homolog (S. pombe)	-0.461451	6.41736	-4.91435	0.00267937	0.0160665	-1.67572	6.21266	6.1606	6.65895	6.63722
16707493	ENST00000492654	HHEX	hematopoietically expressed homeobox	0.522138	6.32718	4.91132	0.00268757	0.0161019	-1.6791	6.54561	6.63089	5.98594	6.14628
17012963	NM_020340	KIAA1244	KIAA1244	0.47297	8.02833	4.91032	0.00269027	0.0161019	-1.68021	8.23273	8.2969	7.75797	7.82572
16834812	NM_025104	DBF4B	DBF4 zinc finger B	-0.47089	7.23485	-4.90987	0.00269147	0.0161019	-1.6807	6.9557	7.04311	7.47556	7.46503
16925158	NR_040016	TMEM50B	transmembrane protein 50B	-0.479147	5.71931	-4.90887	0.00269419	0.0161019	-1.68182	5.47013	5.48934	6.0121	5.90566
16992096	NM_017785	SPDL1	spindle apparatus coiled-coil protein 1	-0.524484	7.11111	-4.90872	0.00269461	0.0161019	-1.68199	6.76247	6.93526	7.40685	7.33985
17115505	NM_001110556	FLNA	filamin A, alpha	0.507444	11.0044	4.9081	0.00269628	0.0161019	-1.68267	11.2665	11.2498	10.6711	10.8303
16726572	NM_006244	PPP2R5B	protein phosphatase 2, regulatory subunit B, beta	0.52331	6.08137	4.90795	0.00269669	0.0161019	-1.68284	6.25364	6.43242	5.79843	5.84101
16997519	NM_000046	ARSB	arylsulfatase B	-0.613328	5.79221	-4.89974	0.00271908	0.0162226	-1.69199	5.35147	5.61963	6.04097	6.15678
16980693	NM_001013415	FBXW7	F-box and WD repeat domain containing 7, E3 ubiquitin protein ligase	0.507233	5.70947	4.89863	0.00272213	0.0162226	-1.69323	6.01621	5.90998	5.51655	5.39517
17109545	NM_001079858	GPR64	G protein-coupled receptor 64	-0.497531	6.93547	-4.89855	0.00272235	0.0162226	-1.69331	6.7213	6.65212	7.2482	7.12027
16746142	NM_020228	PRDM10	PR domain containing 10	-0.550262	7.03442	-4.89815	0.00272346	0.0162226	-1.69377	6.76662	6.75197	7.19937	7.41974
16921036	NM_031215	CABLES2	Cdk5 and Abl enzyme substrate 2	-0.509411	7.53058	-4.89533	0.00273122	0.016259	-1.69691	7.22166	7.33009	7.72296	7.84762
16930023	NM_001039583	PICK1	protein interacting with PRKCA 1	0.511405	6.34926	4.89119	0.00274266	0.0163172	-1.70153	6.52775	6.68217	6.0593	6.12781
16908373	NM_020935	USP37	ubiquitin specific peptidase 37	-0.480786	7.54985	-4.88911	0.00274843	0.0163417	-1.70386	7.25929	7.35964	7.76133	7.81916
16894235	NM_020738	KIDINS220	kinase D-interacting substrate, 220kDa	-0.465515	7.32108	-4.88552	0.00275841	0.0163912	-1.70786	7.09732	7.07932	7.5151	7.59257
17071119	NM_014754	PTDSS1	phosphatidylserine synthase 1	-0.463108	9.39404	-4.88441	0.00276149	0.0163997	-1.7091	9.1263	9.19868	9.62385	9.62734
16822815	NM_080861	SPSB3	splA/ryanodine receptor domain and SOCS box containing 3	0.458651	6.84074	4.87992	0.00277407	0.0164645	-1.71412	7.05482	7.08532	6.58666	6.63618
16712458	NM_022365	DNAJC1	DnaJ (Hsp40) homolog, subfamily C, member 1	0.460346	7.83635	4.87881	0.00277716	0.0164729	-1.71536	8.03863	8.09442	7.58958	7.62278
17017485	NM_005527	HSPA1L	heat shock 70kDa protein 1-like	-0.466418	6.09469	-4.87753	0.00278076	0.0164773	-1.71679	5.89387	5.82908	6.35486	6.30093
16765625	NM_006741	PPP1R1A	protein phosphatase 1, regulatory (inhibitor) subunit 1A	-0.51193	5.58887	-4.87737	0.00278123	0.0164773	-1.71697	5.27878	5.38703	5.91161	5.77806
16831667	NM_024052	GID4	GID complex subunit 4	0.468916	6.57426	4.87476	0.00278858	0.0165109	-1.71989	6.80681	6.81062	6.38561	6.29399
17115394	NM_005334	HCFC1	host cell factor C1	-0.453967	10.6376	-4.87398	0.00279078	0.0165127	-1.72076	10.4298	10.3914	10.8629	10.8663
16820398	NM_001076785	SLC7A6	solute carrier family 7 (amino acid transporter light chain, y+L system), member 6	-0.455499	8.84851	-4.87347	0.00279221	0.0165127	-1.72133	8.59851	8.64302	9.06873	9.08379
16882150	NM_020122	KCMF1	potassium channel modulatory factor 1	0.45079	10.0285	4.87088	0.00279954	0.0165461	-1.72423	10.2602	10.2476	9.80403	9.80218
16985950	NM_005909	MAP1B	microtubule-associated protein 1B	0.502007	9.35296	4.86854	0.00280617	0.0165753	-1.72684	9.55913	9.64879	9.16696	9.03694
16664078	NM_025077	TOE1	target of EGR1, member 1 (nuclear)	-0.46746	7.20139	-4.86773	0.00280847	0.016579	-1.72775	7.0111	6.92422	7.42402	7.44622
16696504	NR_002578	GAS5	growth arrest-specific 5 (non-protein coding)	0.53811	8.63693	4.86661	0.00281166	0.0165879	-1.729	8.80727	9.00469	8.33225	8.4035
16958432	NM_001195483	SLC12A8	solute carrier family 12, member 8	0.564676	7.08117	4.8626	0.00282311	0.0166456	-1.7335	7.34128	7.38573	6.67928	6.91838
16948572	NM_017644	KLHL24	kelch-like family member 24	0.49305	7.53603	4.86034	0.00282958	0.0166737	-1.73603	7.75665	7.80846	7.22211	7.35689
16918522	NM_080476	PIGU	phosphatidylinositol glycan anchor biosynthesis, class U	-0.506081	8.50723	-4.8564	0.0028409	0.0167305	-1.74044	8.17276	8.33561	8.77722	8.74331
16985794	NM_001042490	GTF2H2C_2	GTF2H2 family member C, copy 2	-0.530365	7.7063	-4.85457	0.00284619	0.0167378	-1.7425	7.34043	7.54181	7.96956	7.97341
17109153	NM_001011658	TRAPPC2	trafficking protein particle complex 2	-0.460106	5.58241	-4.85432	0.0028469	0.0167378	-1.74278	5.32381	5.38091	5.79055	5.83438
16806692	NR_026859	ULK4P3	ULK4 pseudogene 3	-0.501538	6.24844	-4.85421	0.00284723	0.0167378	-1.7429	5.95808	6.03726	6.56847	6.42995
16776658	NM_015205	ATP11A	ATPase, class VI, type 11A	0.457938	8.23986	4.85312	0.00285038	0.0167464	-1.74413	8.43809	8.49958	8.0214	8.00039
17005578	BC101748	HIST1H2BE	histone cluster 1, H2be	-0.784388	5.47699	-4.85203	0.00285354	0.016753	-1.74535	4.85724	5.31234	5.83889	5.89947
16756923	NM_001681	ATP2A2	ATPase, Ca++ transporting, cardiac muscle, slow twitch 2	-0.551929	9.79935	-4.85156	0.0028549	0.016753	-1.74588	9.41238	9.6344	10.0464	10.1042
17049090	NM_145914	ZSCAN21	zinc finger and SCAN domain containing 21	0.462632	8.18035	4.84962	0.00286053	0.0167761	-1.74806	8.38592	8.43742	7.98037	7.9177
16812897	NM_022480	KLHL25	kelch-like family member 25	-0.521784	5.96518	-4.84773	0.00286602	0.0167983	-1.75017	5.70994	5.69863	6.32126	6.13089
17115692	NM_001166460	MPP1	membrane protein, palmitoylated 1, 55kDa	-0.469235	7.48231	-4.84652	0.00286955	0.0168091	-1.75154	7.27136	7.22403	7.76057	7.67328
17005197	NM_182757	RNF144B	ring finger protein 144B	0.799774	5.32345	4.8451	0.00287368	0.0168184	-1.75313	5.51311	5.93357	5.03237	4.81476
16825855	NM_138447	ZNF689	zinc finger protein 689	-0.564249	6.39601	-4.84481	0.00287454	0.0168184	-1.75346	6.08489	6.14289	6.79723	6.55905
16947974	NM_001135095	FNDC3B	fibronectin type III domain containing 3B	0.460785	9.48306	4.84402	0.00287683	0.0168218	-1.75434	9.68293	9.74397	9.2763	9.22903
17101543	ENST00000380636	TMSB4X	thymosin beta 4, X-linked	0.590579	7.35019	4.84235	0.00288174	0.0168324	-1.75622	7.76146	7.52951	7.12906	6.98074
16815498	ENST00000262366	GLIS2	GLIS family zinc finger 2	0.491328	7.09584	4.84224	0.00288204	0.0168324	-1.75634	7.39036	7.29265	6.79688	6.90347
16835335	NM_003110	SP2	Sp2 transcription factor	-0.582096	7.74965	-4.84149	0.00288424	0.0168352	-1.75718	7.33022	7.58699	8.07551	8.00589
17000724	NM_001945	HBEGF	heparin-binding EGF-like growth factor	0.827845	6.39415	4.83756	0.00289578	0.0168852	-1.76159	6.74705	6.86909	6.22192	5.73853
16824400	ENST00000472413	NPIPA1	nuclear pore complex interacting protein family, member A1	0.561194	9.48886	4.83742	0.00289621	0.0168852	-1.76176	9.72333	9.81558	9.0961	9.32042
17073146	NM_007079	PTP4A3	protein tyrosine phosphatase type IVA, member 3	0.465354	7.12689	4.8342	0.0029057	0.0169305	-1.76537	7.31515	7.40399	6.90724	6.88119
16815259	NM_032296	FLYWCH1	FLYWCH-type zinc finger 1	0.53585	6.77353	4.83271	0.00291009	0.0169456	-1.76705	7.09193	6.99097	6.41249	6.59871
16900657	ENST00000417561	FAM178B	family with sequence similarity 178, member B	0.462068	6.1613	4.83216	0.00291172	0.0169456	-1.76766	6.42642	6.35825	5.9055	5.95504
16974121	NM_001134647	AFAP1	actin filament associated protein 1	0.558606	5.50735	4.82871	0.00292196	0.0169931	-1.77154	5.81447	5.75885	5.11098	5.34513
16866337	NM_005762	TRIM28	tripartite motif containing 28	-0.448682	10.9541	-4.82826	0.00292331	0.0169931	-1.77206	10.7359	10.7237	11.1638	11.1931
16910306	ENST00000425110	LOC728208	uncharacterized LOC728208	-0.498215	5.55018	-4.82482	0.00293358	0.0170366	-1.77593	5.24086	5.36129	5.85127	5.74731
17086708	NM_001135052	SYK	spleen tyrosine kinase	-0.517555	9.61312	-4.82408	0.00293578	0.0170366	-1.77676	9.26519	9.44349	9.84157	9.90222
16808101	NM_152455	ZSCAN29	zinc finger and SCAN domain containing 29	0.504882	7.52885	4.82402	0.00293597	0.0170366	-1.77683	7.75121	7.81137	7.19707	7.35575
16744174	NM_001260492	RDX	radixin	-0.455997	6.34459	-4.82187	0.0029424	0.0170639	-1.77925	6.08858	6.14461	6.55287	6.59231
17110289	XM_005272608	MAOB	monoamine oxidase B	-0.505855	6.7895	-4.82048	0.00294657	0.0170737	-1.78081	6.45311	6.62004	7.06265	7.02221
16892555	NM_003648	DGKD	diacylglycerol kinase, delta 130kDa	0.474422	7.05108	4.81995	0.00294818	0.0170737	-1.78142	7.34553	7.23106	6.82532	6.80242
17088527	NM_003266	TLR4	toll-like receptor 4	0.533413	7.50305	4.81938	0.00294986	0.0170737	-1.78205	7.75359	7.78592	7.1323	7.34038
16706259	ENST00000372725	KAT6B	K(lysine) acetyltransferase 6B	-0.466685	7.41121	-4.81901	0.002951	0.0170737	-1.78248	7.22762	7.12811	7.64625	7.64285
17113418	ENST00000304758	AMOT	angiomotin	-0.620121	6.28185	-4.8181	0.00295372	0.0170794	-1.78349	6.03915	5.90444	6.73149	6.45234
17099980	NM_014866	SEC16A	SEC16 homolog A (S. cerevisiae)	0.459777	8.88409	4.81518	0.00296253	0.0171203	-1.78679	9.08768	9.14026	8.6225	8.6859
16986065	NM_001161342	TMEM171	transmembrane protein 171	0.517279	6.46313	4.81432	0.00296512	0.0171253	-1.78775	6.66838	6.77515	6.12625	6.28272
16813342	NM_001267580	PRC1	protein regulator of cytokinesis 1	-0.53642	8.86906	-4.81313	0.00296874	0.0171362	-1.7891	8.494	8.7077	9.1507	9.12384
16780236	ENST00000498294	TGDS	TDP-glucose 4,6-dehydratase	0.496314	7.05156	4.81202	0.0029721	0.0171455	-1.79035	7.28295	7.31648	6.88068	6.72612
16714747	NM_001282941	RTKN2	rhotekin 2	-0.478429	6.78605	-4.81134	0.00297418	0.0171475	-1.79112	6.5797	6.51398	6.97118	7.07935
16665447	NM_001017415	USP1	ubiquitin specific peptidase 1	-0.467293	9.66366	-4.81046	0.00297684	0.0171479	-1.79211	9.38555	9.47449	9.92328	9.87135
16856848	NM_173480	ZNF57	zinc finger protein 57	0.520303	6.04674	4.81017	0.00297771	0.0171479	-1.79244	6.25221	6.36157	5.7063	5.86688
16805422	NM_001145155	NR2F2	nuclear receptor subfamily 2, group F, member 2	-0.515197	7.14719	-4.80737	0.00298625	0.0171747	-1.7956	6.96406	6.81511	7.34782	7.46176
16664731	ENST00000487160	PRPF38A	pre-mRNA processing factor 38A	-0.508278	8.77017	-4.80663	0.00298849	0.0171747	-1.79643	8.45559	8.57647	8.95926	9.08935
16707872	NM_001134375	CCNJ	cyclin J	0.455447	6.68539	4.80649	0.00298893	0.0171747	-1.79659	6.94791	6.87832	6.46605	6.44929
16688339	NM_001002292	WLS	wntless Wnt ligand secretion mediator	-0.460871	7.23698	-4.80636	0.00298933	0.0171747	-1.79674	7.04003	6.97305	7.43904	7.49579
16678191	ENST00000366779	ADCK3	aarF domain containing kinase 3	-0.455893	6.2833	-4.80379	0.00299716	0.0172097	-1.79963	6.06503	6.04567	6.54688	6.47561
17091695	ENST00000340384	TUBB4B	tubulin, beta 4B class IVb	-0.545351	8.91914	-4.80252	0.00300107	0.0172222	-1.80107	8.54077	8.75216	9.14885	9.23477
16786652	NM_015072	TTLL5	tubulin tyrosine ligase-like family, member 5	-0.499413	8.53364	-4.80178	0.00300332	0.0172251	-1.8019	8.36332	8.20454	8.80542	8.76127
17045354	BX648555	YAE1D1	Yae1 domain containing 1	-0.477293	6.83382	-4.79564	0.00302223	0.0173235	-1.80884	6.53338	6.65697	7.08794	7.057
16663033	NM_001198978	SMAP2	small ArfGAP2	-0.496542	7.78732	-4.79469	0.00302518	0.0173304	-1.80992	7.53659	7.5415	7.95492	8.11626
16918953	XM_006723838	NDRG3	NDRG family member 3	-0.59772	7.96279	-4.79401	0.00302727	0.0173323	-1.81068	7.80113	7.52674	8.30789	8.21541
16970096	NM_020961	METTL14	methyltransferase like 14	-0.48728	7.18267	-4.79344	0.00302904	0.0173324	-1.81133	6.91414	6.96391	7.49503	7.35758
16749446	NM_001145010	SMCO2	single-pass membrane protein with coiled-coil domains 2	0.965367	5.62594	4.79155	0.0030349	0.0173558	-1.81346	6.24674	5.97051	5.42065	4.86586
16685779	NM_000310	PPT1	palmitoyl-protein thioesterase 1	-0.501632	8.13347	-4.79017	0.00303921	0.0173616	-1.81503	7.81087	7.95443	8.42995	8.33861
16687737	AF017786	PPAP2B	phosphatidic acid phosphatase type 2B	-0.799015	5.53767	-4.7901	0.00303943	0.0173616	-1.81511	4.89872	5.37759	5.95794	5.9164
16989396	ENST00000512783	PCBD2	pterin-4 alpha-carbinolamine dehydratase/dimerization cofactor of hepatocyte nuclear factor 1 alpha (TCF1) 2	-0.506826	6.31911	-4.78718	0.0030485	0.0174019	-1.8184	5.9988	6.1326	6.51346	6.63159
16920699	ENST00000334187	PPP4R1L	protein phosphatase 4, regulatory subunit 1-like	0.697269	5.32583	4.78597	0.00305229	0.0174019	-1.81978	5.6071	5.74184	4.79431	5.16008
16662077	NM_004964	HDAC1	histone deacetylase 1	-0.448246	8.05358	-4.7857	0.00305314	0.0174019	-1.82009	7.80976	7.84914	8.29431	8.26109
16909724	NM_001282431	ARL4C	ADP-ribosylation factor-like 4C	0.504438	9.39078	4.78557	0.00305353	0.0174019	-1.82023	9.55693	9.72907	9.12236	9.15477
16796128	NM_001002860	BTBD7	BTB (POZ) domain containing 7	-0.472885	7.65104	-4.78455	0.00305674	0.0174102	-1.82139	7.35438	7.47482	7.88291	7.89205
16713454	NM_001282862	RASGEF1A	RasGEF domain family, member 1A	0.654864	5.73224	4.78218	0.00306417	0.0174425	-1.82407	6.05167	6.06767	5.23014	5.57947
16989001	NM_003059	SLC22A4	solute carrier family 22 (organic cation/zwitterion transporter), member 4	0.69359	6.79474	4.781	0.00306787	0.0174513	-1.8254	7.00729	7.27578	6.58732	6.30858
16797375	ENST00000521393	IGHEP1	immunoglobulin heavy constant epsilon P1 (pseudogene)	-0.513405	6.79876	-4.78056	0.00306924	0.0174513	-1.8259	6.55897	6.52514	7.14847	6.96245
16825057	NM_015044	GGA2	golgi-associated, gamma adaptin ear containing, ARF binding protein 2	-0.565385	6.92195	-4.77693	0.00308069	0.0175063	-1.83001	6.75156	6.52695	7.26582	7.14346
16662664	NM_001031740	MANEAL	mannosidase, endo-alpha-like	-0.470037	6.63528	-4.77432	0.00308893	0.0175371	-1.83297	6.44308	6.35745	6.83047	6.91014
16966733	NM_023940	RASL11B	RAS-like, family 11, member B	0.601503	6.5314	4.77409	0.00308967	0.0175371	-1.83323	6.69272	6.97158	6.28071	6.18058
16991010	NM_000112	SLC26A2	solute carrier family 26 (anion exchanger), member 2	-0.577586	6.19104	-4.77097	0.00309957	0.0175793	-1.83676	5.76823	6.03625	6.46148	6.49818
16863652	NM_014601	EHD2	EH-domain containing 2	0.747444	7.10396	4.77063	0.00310066	0.0175793	-1.83715	7.25938	7.69599	6.71342	6.74706
16967875	NM_015393	PARM1	prostate androgen-regulated mucin-like protein 1	-0.579114	6.57239	-4.76759	0.00311034	0.0176241	-1.8406	6.15339	6.41228	6.90478	6.81912
16830988	NM_001025579	NDEL1	nudE neurodevelopment protein 1-like 1	0.454313	9.57004	4.7648	0.00311927	0.0176645	-1.84377	9.78014	9.81425	9.3793	9.30646
16886602	NM_152522	ARL6IP6	ADP-ribosylation factor-like 6 interacting protein 6	-0.644563	6.57241	-4.76399	0.00312184	0.017667	-1.84468	6.10323	6.39703	6.98218	6.80721
16950686	NM_001136026	SEC13	SEC13 homolog (S. cerevisiae)	0.441784	7.04154	4.76284	0.00312555	0.017667	-1.84599	7.27332	7.25155	6.81447	6.82683
16850107	NM_004104	FASN	fatty acid synthase	0.466953	10.3087	4.76248	0.00312669	0.017667	-1.84639	10.5779	10.5064	10.0315	10.1189
16664118	NM_001195193	NASP	nuclear autoantigenic sperm protein (histone-binding)	-0.520633	7.82186	-4.76221	0.00312758	0.017667	-1.84671	7.48153	7.64156	8.02062	8.14374
16936255	NM_024105	ALG12	ALG12, alpha-1,6-mannosyltransferase	-0.498307	7.67913	-4.76138	0.00313024	0.017667	-1.84765	7.42131	7.43865	7.8439	8.01268
16951085	NR_046251	FGD5-AS1	FGD5 antisense RNA 1	-0.487261	7.57799	-4.76121	0.00313077	0.017667	-1.84783	7.39814	7.27057	7.78049	7.86275
16823477	NM_001116	ADCY9	adenylate cyclase 9	-0.499238	7.11517	-4.76073	0.00313234	0.017667	-1.84839	6.7971	6.93401	7.31338	7.4162
16834621	NM_001661	ARL4D	ADP-ribosylation factor-like 4D	0.440403	7.4512	4.76021	0.00313401	0.017667	-1.84898	7.6677	7.6751	7.22779	7.23422
16813062	NM_000326	RLBP1	retinaldehyde binding protein 1	0.588868	8.36072	4.75667	0.00314542	0.0177209	-1.85299	8.53574	8.77456	8.14403	7.98854
16817408	NM_007245	ATXN2L	ataxin 2-like	0.463361	9.90311	4.7561	0.00314727	0.0177209	-1.85364	10.0828	10.1868	9.6606	9.68226
17012207	NM_001286138	SMPDL3A	sphingomyelin phosphodiesterase, acid-like 3A	-0.69976	5.37029	-4.75395	0.00315422	0.0177209	-1.85608	4.92279	5.11802	5.5476	5.89273
17094814	NM_001135820	TMEM2	transmembrane protein 2	-0.450458	8.10806	-4.75393	0.0031543	0.0177209	-1.85611	7.91645	7.84922	8.32105	8.34554
16661934	NM_018056	TMEM39B	transmembrane protein 39B	-0.521744	5.901	-4.75389	0.00315443	0.0177209	-1.85615	5.62502	5.65523	6.26308	6.06066
17119096	ENST00000548801	MIR10A	microRNA 10a	0.738444	7.98214	4.75373	0.00315493	0.0177209	-1.85633	8.26622	8.43651	7.41432	7.81152
16680695	NR_037844	LOC100133445	uncharacterized LOC100133445	0.469185	6.2802	4.75337	0.00315612	0.0177209	-1.85675	6.56621	6.46338	6.01516	6.07606
17077680	NM_000370	TTPA	tocopherol (alpha) transfer protein	-0.609726	7.24807	-4.75229	0.00315962	0.0177305	-1.85797	6.7935	7.09291	7.5889	7.51697
16904588	NM_024753	TTC21B	tetratricopeptide repeat domain 21B	-0.498212	7.48149	-4.74911	0.00316998	0.0177785	-1.86159	7.31048	7.15429	7.76603	7.69516
16985277	NM_001278926	PPWD1	peptidylprolyl isomerase domain and WD repeat containing 1	-0.675838	6.56611	-4.74616	0.00317961	0.0178224	-1.86494	6.16581	6.29057	7.08081	6.72725
16722278	NM_006108	SPON1	spondin 1, extracellular matrix protein	0.750751	5.97351	4.7445	0.00318504	0.0178427	-1.86682	6.12704	6.57072	5.58401	5.61225
16920180	NM_001135773	SPATA2	spermatogenesis associated 2	0.444077	7.59775	4.74105	0.00319638	0.0178961	-1.87075	7.81236	7.82722	7.35102	7.40041
17106168	NM_001242617	NXT2	nuclear transport factor 2-like export factor 2	-0.620858	5.57204	-4.73588	0.00321345	0.0179815	-1.87664	5.16839	5.35483	6.01358	5.75136
16841778	NM_001113567	LRRC75A	leucine rich repeat containing 75A	0.4871	7.88951	4.7344	0.00321837	0.0179989	-1.87833	8.20304	8.06308	7.61133	7.68059
16699643	NM_001037175	SUSD4	sushi domain containing 4	0.548149	5.40036	4.73361	0.00322099	0.0180033	-1.87922	5.79501	5.55386	5.13087	5.1217
16753837	NM_018656	SLC35E3	solute carrier family 35, member E3	-0.682492	5.89825	-4.73202	0.00322628	0.0180226	-1.88104	5.37261	5.74138	6.29161	6.18737
16839086	NM_004514	FOXK2	forkhead box K2	0.437267	7.90024	4.72805	0.0032395	0.0180863	-1.88556	8.11679	8.12097	7.68074	7.68248
16673961	NM_014458	KLHL20	kelch-like family member 20	-0.486547	7.73873	-4.72576	0.00324719	0.018119	-1.88818	7.4222	7.56872	8.0098	7.95421
16830631	ENST00000467699	WRAP53	WD repeat containing, antisense to TP53	-0.624618	6.38648	-4.72401	0.00325304	0.0181414	-1.89017	5.9198	6.22854	6.64459	6.75299
16815652	NM_019109	ALG1	ALG1, chitobiosyldiphosphodolichol beta-mannosyltransferase	-0.476406	7.77588	-4.72335	0.00325525	0.0181435	-1.89092	7.49712	7.57824	7.95738	8.07079
16859643	NM_014256	B3GNT3	UDP-GlcNAc:betaGal beta-1,3-N-acetylglucosaminyltransferase 3	0.446333	7.90886	4.72136	0.00326196	0.0181706	-1.89319	8.12839	8.13567	7.65191	7.71949
16724570	NM_001128225	SLC39A13	solute carrier family 39 (zinc transporter), member 13	0.444347	7.07212	4.71912	0.00326952	0.0182025	-1.89575	7.32496	7.26362	6.85129	6.8486
16946762	NM_001184720	GYG1	glycogenin 1	-0.444953	6.76389	-4.71441	0.00328547	0.0182798	-1.90112	6.51049	6.57234	6.99695	6.97579
17125292	NM_001540	HSPB1	heat shock 27kDa protein 1	-0.445471	12.0494	-4.71384	0.00328742	0.0182798	-1.90178	11.8235	11.8299	12.3057	12.2386
17124454	NR_024271	SEPT7P2	septin 7 pseudogene 2	-0.495564	7.42249	-4.71301	0.00329024	0.0182798	-1.90273	7.12476	7.22466	7.74106	7.59948
16762941	NM_144973	DENND5B	DENN/MADD domain containing 5B	-0.487499	6.35275	-4.71284	0.0032908	0.0182798	-1.90292	6.08438	6.13362	6.52012	6.67287
17007996	NR_036610	SRSF3	serine/arginine-rich splicing factor 3	-0.46095	9.56002	-4.71185	0.00329418	0.0182882	-1.90405	9.38184	9.27724	9.77267	9.80831
16888047	NM_003659	AGPS	alkylglycerone phosphate synthase	-0.453166	8.59602	-4.70959	0.00330187	0.018311	-1.90663	8.38911	8.34978	8.78098	8.86423
16847586	NM_001003786	STRADA	STE20-related kinase adaptor alpha	-0.444261	7.68965	-4.70956	0.00330197	0.018311	-1.90666	7.45311	7.48193	7.94063	7.88293
17076249	NR_121621	LOC100507420	uncharacterized LOC100507420	-0.487417	6.73917	-4.70852	0.00330553	0.0183137	-1.90785	6.43993	6.551	7.04122	6.92455
16707291	NM_001104546	RPP30	ribonuclease P/MRP 30kDa subunit	-0.508712	7.09252	-4.70833	0.00330618	0.0183137	-1.90807	6.74434	6.93198	7.32331	7.37044
16753712	NM_018448	CAND1	cullin-associated and neddylation-dissociated 1	-0.458873	8.48417	-4.70677	0.00331151	0.0183267	-1.90985	8.22413	8.28534	8.75742	8.66979
17122534	NM_012249	RHOQ	ras homolog family member Q	0.467513	10.1783	4.70656	0.00331223	0.0183267	-1.91009	10.4662	10.3579	9.97632	9.9128
16837230	NM_004459	BPTF	bromodomain PHD finger transcription factor	-0.46553	10.2368	-4.70569	0.00331523	0.0183269	-1.91109	10.0623	9.94574	10.487	10.4521
16851443	NM_003831	RIOK3	RIO kinase 3	0.486693	9.63785	4.70547	0.00331597	0.0183269	-1.91133	9.80122	9.96118	9.40059	9.38843
17025152	NM_032861	SERAC1	serine active site containing 1	0.468707	7.41614	4.70469	0.00331868	0.0183316	-1.91224	7.66277	7.63821	7.24477	7.11881
17114007	NM_017413	APLN	apelin	-0.637165	5.96467	-4.70175	0.00332877	0.018377	-1.91559	5.57819	5.71398	6.44073	6.12577
16933774	NM_001037666	GATSL3	GATS protein-like 3	0.617091	6.38413	4.70007	0.00333458	0.018394	-1.91752	6.8523	6.53304	6.09909	6.05208
17112607	NM_001278740	TSPAN6	tetraspanin 6	-0.561304	8.1789	-4.69939	0.00333692	0.018394	-1.91829	8.0291	7.7674	8.45712	8.46199
16827833	NM_138383	MTSS1L	metastasis suppressor 1-like	0.477174	6.90071	4.69925	0.00333743	0.018394	-1.91846	7.12964	7.14895	6.73409	6.59015
17109342	uc004cxh.3	AP1S2	adaptor-related protein complex 1, sigma 2 subunit	0.451215	7.24284	4.69842	0.00334028	0.0183995	-1.9194	7.42751	7.50938	7.03556	6.9989
16796810	OTTHUMT00000414793	RP11-1029J19.5	novel transcript	0.890546	6.38188	4.69734	0.00334401	0.0184098	-1.92064	6.71602	6.93829	5.67252	6.20069
16671516	NM_001184891	FLAD1	flavin adenine dinucleotide synthetase 1	0.440052	6.65789	4.69509	0.00335182	0.0184425	-1.92321	6.85598	6.89986	6.42313	6.4526
16861012	NM_005304	FFAR3	free fatty acid receptor 3	0.690691	6.16447	4.69198	0.00336265	0.0184917	-1.92678	6.65335	6.36628	5.95592	5.68233
17114386	NM_001078172	FAM127B	family with sequence similarity 127, member B	-0.694219	5.78769	-4.69139	0.0033647	0.0184928	-1.92745	5.56385	5.31732	6.2923	5.97731
16667662	NM_003672	CDC14A	cell division cycle 14A	-0.548612	6.4569	-4.69067	0.0033672	0.0184962	-1.92827	6.26493	6.10025	6.63853	6.82388
16924878	NM_003253	TIAM1	T-cell lymphoma invasion and metastasis 1	-0.439591	8.51475	-4.68848	0.00337489	0.0185281	-1.93079	8.26904	8.32087	8.72776	8.74133
17071549	ENST00000517910	FLJ45248	FLJ45248 protein	-0.802918	5.31704	-4.68465	0.00338832	0.0185915	-1.93518	4.75506	5.07611	5.90992	5.52708
16968047	OTTHUMT00000347380	AC107072.2	novel transcript	-0.480729	6.21197	-4.68395	0.00339077	0.0185947	-1.93598	6.01415	5.92906	6.38807	6.5166
16812764	NR_027001	GOLGA2P7	golgin A2 pseudogene 7	0.46156	8.35067	4.68184	0.0033982	0.0186236	-1.93839	8.52394	8.63897	8.10606	8.13372
17116730	NM_001173473	ASMTL	acetylserotonin O-methyltransferase-like	0.480885	7.07453	4.68139	0.00339982	0.0186236	-1.93892	7.39095	7.239	6.84904	6.81914
16916682	NM_001174089	SLC4A11	solute carrier family 4, sodium borate transporter, member 11	0.466785	8.42657	4.68082	0.00340181	0.0186242	-1.93957	8.72284	8.59708	8.20805	8.1783
16916221	XM_006723873	TCEA2	transcription elongation factor A (SII), 2	-0.442848	5.49116	-4.67951	0.00340644	0.0186392	-1.94107	5.24552	5.29396	5.68758	5.73759
17042925	NM_001128636	ELFN1	extracellular leucine-rich repeat and fibronectin type III domain containing 1	0.47872	6.56045	4.67776	0.00341265	0.0186629	-1.94308	6.75836	6.84127	6.25752	6.38466
16708049	NM_031484	MARVELD1	MARVEL domain containing 1	-0.516467	7.4309	-4.67594	0.00341909	0.0186734	-1.94516	7.1407	7.20464	7.58958	7.78869
16860587	NM_018025	GPATCH1	G patch domain containing 1	-0.448406	8.38753	-4.67552	0.0034206	0.0186734	-1.94565	8.19906	8.1276	8.58604	8.63743
17067553	NM_006571	DCTN6	dynactin 6	-0.49478	7.71	-4.67548	0.00342075	0.0186734	-1.9457	7.46883	7.45638	8.04624	7.86853
16966071	OTTHUMT00000360688	RP11-360F5.3	putative novel transcript	0.662314	6.21908	4.67509	0.00342213	0.0186734	-1.94615	6.44138	6.65909	5.73735	6.03849
16772535	OTTHUMT00000399232	RP11-495K9.9	novel transcript	-0.445294	5.97916	-4.67347	0.00342789	0.0186853	-1.948	5.78551	5.72752	6.17463	6.22898
17019554	NM_001286509	SLC35B2	solute carrier family 35 (adenosine 3-phospho 5-phosphosulfate transporter), member B2	-0.441175	8.61954	-4.67341	0.0034281	0.0186853	-1.94807	8.40899	8.38891	8.80885	8.87141
16854185	NM_052911	ESCO1	establishment of sister chromatid cohesion N-acetyltransferase 1	0.461833	8.2393	4.67269	0.00343066	0.018689	-1.9489	8.42051	8.51992	7.97407	8.04269
16962921	NM_024524	ATP13A3	ATPase type 13A3	-0.444242	9.55477	-4.67105	0.00343652	0.0187106	-1.95078	9.35381	9.31149	9.80901	9.74477
16693996	NM_001252607	THBS3	thrombospondin 3	0.506704	5.36863	4.67017	0.00343968	0.0187174	-1.95179	5.58959	5.65438	5.02253	5.20802
16910565	OTTHUMT00000003225	RP11-34P13.7	novel transcript	0.591434	6.83242	4.6672	0.00345032	0.018765	-1.95521	6.98029	7.27599	6.51141	6.56199
17093260	NM_022917	NOL6	nucleolar protein 6 (RNA-associated)	0.450886	8.52751	4.66614	0.00345411	0.0187753	-1.95642	8.79913	8.70678	8.31699	8.28715
16881770	NR_024606	LBX2-AS1	LBX2 antisense RNA 1	-0.607371	6.68863	-4.66474	0.00345915	0.0187922	-1.95803	6.54011	6.22978	7.02555	6.95908
16962359	NM_001243879	TRA2B	transformer 2 beta homolog (Drosophila)	-0.461007	9.36776	-4.66422	0.00346102	0.0187922	-1.95863	9.15484	9.11967	9.65606	9.54047
16809263	NM_001174116	DMXL2	Dmx-like 2	-0.468075	7.24818	-4.66326	0.00346448	0.0188007	-1.95973	7.00237	7.02592	7.54876	7.41568
17094082	NM_001007563	IGFBPL1	insulin-like growth factor binding protein-like 1	-0.443425	5.7866	-4.66205	0.00346885	0.0188062	-1.96112	5.59352	5.53627	6.03409	5.98254
17016360	NM_003544	HIST1H4B	histone cluster 1, H4b	-1.66933	4.54434	-4.66185	0.00346958	0.0188062	-1.96136	3.41724	4.00212	4.85638	5.90164
17124632	XR_432230	LOC101928451	serine/threonine-protein kinase tousled-like 2-like	0.464506	9.84976	4.6614	0.00347121	0.0188062	-1.96187	10.0804	10.0836	9.55325	9.68176
16672988	NM_007348	ATF6	activating transcription factor 6	0.464458	8.86242	4.66053	0.00347435	0.0188087	-1.96287	9.10875	9.08054	8.56744	8.69294
16883498	NM_002518	NPAS2	neuronal PAS domain protein 2	0.447411	8.20228	4.66022	0.00347547	0.0188087	-1.96323	8.38338	8.46859	7.992	7.96515
17003493	NM_001278346	PHYKPL	5-phosphohydroxy-L-lysine phospho-lyase	0.677419	6.90667	4.65795	0.0034837	0.0188429	-1.96584	7.18156	7.3092	6.38442	6.7515
16729585	NM_015885	PCF11	PCF11 cleavage and polyadenylation factor subunit	-0.465022	6.56756	-4.6564	0.00348933	0.018863	-1.96762	6.39802	6.27208	6.81728	6.78287
16829080	NR_120309	LOC102724467	uncharacterized LOC102724467	0.5715	5.43342	4.65522	0.0034936	0.0188758	-1.96898	5.63877	5.79956	5.26202	5.03331
16736422	NM_138421	SAAL1	serum amyloid A-like 1	-0.434188	5.94122	-4.65438	0.00349667	0.0188783	-1.96995	5.733	5.71525	6.17763	6.139
16803185	NR_104312	COMMD4	COMM domain containing 4	-0.460747	7.17412	-4.65405	0.00349789	0.0188783	-1.97033	6.89981	6.9877	7.44708	7.36192
16974779	NM_145290	GPR125	G protein-coupled receptor 125	-0.439499	6.7593	-4.6533	0.00350063	0.018881	-1.9712	6.50909	6.57	6.99241	6.96568
16763853	NM_001267594	SENP1	SUMO1/sentrin specific peptidase 1	-0.437186	9.54622	-4.65286	0.00350221	0.018881	-1.97169	9.32062	9.33463	9.73686	9.79277
17039299	ENST00000359635	HLA-B	major histocompatibility complex, class I, B	0.450975	9.71933	4.65233	0.00350417	0.0188813	-1.97231	9.93146	9.95817	9.44532	9.54236
16762087	NM_002907	RECQL	RecQ helicase-like	-0.448371	8.67046	-4.65123	0.00350817	0.0188925	-1.97357	8.47036	8.42219	8.93515	8.85413
16799882	NM_001080541	MGA	MGA, MAX dimerization protein	-0.460214	8.8098	-4.64996	0.00351284	0.0189074	-1.97504	8.61832	8.54107	9.0872	8.99262
16933437	NM_002430	MN1	meningioma (disrupted in balanced translocation) 1	0.651068	6.77151	4.64851	0.00351813	0.0189255	-1.9767	6.91549	7.27861	6.46011	6.43185
17082851	ENST00000530353	ZNF251	zinc finger protein 251	0.719643	5.42577	4.64739	0.00352224	0.018934	-1.97799	5.86158	5.70961	5.2671	4.8648
16968213	NM_005139	ANXA3	annexin A3	0.435284	10.0024	4.64704	0.00352354	0.018934	-1.9784	10.1943	10.2458	9.78279	9.78667
16746546	NM_173593	B4GALNT3	beta-1,4-N-acetyl-galactosaminyl transferase 3	0.514679	6.92493	4.64398	0.00353482	0.0189843	-1.98193	7.07888	7.28566	6.68979	6.64539
17114829	NM_000202	IDS	iduronate 2-sulfatase	-0.54632	7.89197	-4.64319	0.00353772	0.0189896	-1.98284	7.49571	7.7419	8.13847	8.19178
16696548	NM_172071	RC3H1	ring finger and CCCH-type domains 1	-0.459693	9.1558	-4.64261	0.00353986	0.0189907	-1.9835	8.98075	8.87115	9.41306	9.35823
16887635	NM_003642	HAT1	histone acetyltransferase 1	-0.448757	8.55113	-4.6392	0.00355249	0.0190482	-1.98744	8.33331	8.32018	8.8242	8.72681
17090864	NM_000787	DBH	dopamine beta-hydroxylase (dopamine beta-monooxygenase)	-0.488046	5.60576	-4.6372	0.00355992	0.0190776	-1.98974	5.32788	5.39559	5.92992	5.76964
16862173	NM_002446	MAP3K10	mitogen-activated protein kinase kinase kinase 10	0.447707	6.58634	4.63638	0.00356296	0.0190836	-1.99069	6.7647	6.85569	6.34676	6.37822
16784498	NM_021255	PELI2	pellino E3 ubiquitin protein ligase family member 2	0.637537	5.47066	4.63567	0.00356562	0.0190875	-1.99151	5.82902	5.74983	4.98016	5.32361
16860405	NM_006627	POP4	processing of precursor 4, ribonuclease P/MRP subunit (S. cerevisiae)	-0.439619	8.32552	-4.63361	0.00357331	0.0191182	-1.99389	8.14232	8.0691	8.54244	8.54822
16921289	NM_001037335	HELZ2	helicase with zinc finger 2, transcriptional coactivator	0.584049	6.28524	4.63189	0.00357974	0.0191391	-1.99587	6.43478	6.71975	6.0347	5.95174
16705531	NM_003171	SUPV3L1	suppressor of var1, 3-like 1 (S. cerevisiae)	0.514545	8.80167	4.63123	0.00358219	0.0191391	-1.99663	8.96509	9.1528	8.59497	8.49382
16684310	NM_006762	LAPTM5	lysosomal protein transmembrane 5	0.436118	8.45942	4.63085	0.00358362	0.0191391	-1.99707	8.67998	8.67497	8.27212	8.2106
16743262	XM_005273758	SLC36A4	solute carrier family 36 (proton/amino acid symporter), member 4	-0.479244	6.61289	-4.62961	0.00358826	0.0191391	-1.9985	6.3239	6.42264	6.91614	6.78888
16840840	NM_001165967	HES7	hes family bHLH transcription factor 7	0.764989	7.30272	4.62908	0.00359025	0.0191391	-1.99911	7.85866	7.51176	7.08189	6.75856
16754935	NM_181783	TMTC3	transmembrane and tetratricopeptide repeat containing 3	-0.479087	8.1546	-4.62908	0.00359025	0.0191391	-1.99911	7.94295	7.88716	8.4696	8.31868
16838957	NM_144999	LRRC45	leucine rich repeat containing 45	-0.48095	6.09193	-4.62895	0.00359076	0.0191391	-1.99927	5.93263	5.77028	6.32076	6.34404
16700034	NM_001270409	LIN9	lin-9 homolog (C. elegans)	-0.558318	7.00599	-4.62733	0.00359685	0.0191612	-2.00114	6.66536	6.78831	7.40441	7.16589
16698466	NM_030952	NUAK2	NUAK family, SNF1-like kinase, 2	0.560047	6.55914	4.6267	0.0035992	0.0191634	-2.00186	6.70599	6.97234	6.2557	6.30255
16669067	NM_001172411	VANGL1	VANGL planar cell polarity protein 1	-0.51897	7.72094	-4.62527	0.00360458	0.0191817	-2.00351	7.35419	7.56873	8.00482	7.95604
16733719	NM_138342	GLB1L2	galactosidase, beta 1-like 2	-0.427887	8.52232	-4.62323	0.00361228	0.0192123	-2.00587	8.31268	8.30407	8.73134	8.74119
16902611	NM_001199140	AMMECR1L	AMMECR1-like	0.428728	8.66919	4.62247	0.00361517	0.0192174	-2.00675	8.89589	8.87121	8.4545	8.45515
16979133	uc003ibo.4	CAMK2D	calcium/calmodulin-dependent protein kinase II delta	0.788325	5.70251	4.61855	0.00363005	0.0192809	-2.01129	6.08039	6.11296	5.55618	5.06052
16857905	NM_001005415	MARCH2	membrane-associated ring finger (C3HC4) 2, E3 ubiquitin protein ligase	-0.495668	6.24927	-4.61829	0.00363102	0.0192809	-2.01158	5.95771	6.04516	6.41354	6.58066
16846964	NM_001271875	CUEDC1	CUE domain containing 1	0.436047	8.46224	4.61591	0.00364009	0.0193088	-2.01434	8.67115	8.68938	8.21208	8.27636
17010991	NM_001137667	CASP8AP2	caspase 8 associated protein 2	-0.454914	6.61863	-4.61588	0.00364019	0.0193088	-2.01437	6.39224	6.39011	6.90507	6.7871
16870131	NM_001011699	HAUS8	HAUS augmin-like complex, subunit 8	-0.686702	6.36167	-4.61485	0.00364412	0.0193193	-2.01556	5.83031	6.20633	6.63165	6.7784
16866131	NM_173632	ZNF776	zinc finger protein 776	-0.513773	6.16845	-4.61307	0.00365092	0.0193364	-2.01762	5.94085	5.88228	6.32195	6.52872
16883794	NM_144632	TMEM182	transmembrane protein 182	0.451449	5.74463	4.61216	0.00365443	0.0193364	-2.01868	5.97181	5.96889	5.46337	5.57443
17117554	OTTHUMT00000400136	RP11-267J23.4	prothymosin, alpha (PTMA) pseudogene	-0.503093	10.5641	-4.61129	0.00365774	0.0193364	-2.01968	10.239	10.3862	10.7477	10.8837
16703251	NM_001098500	KIAA1217	KIAA1217	-0.600645	7.31072	-4.61109	0.0036585	0.0193364	-2.01991	6.87617	7.14464	7.52616	7.69593
16894740	NM_001142286	SMC6	structural maintenance of chromosomes 6	0.451529	8.7173	4.61067	0.00366012	0.0193364	-2.0204	8.88969	8.99644	8.50783	8.47524
16835064	NM_006178	NSF	N-ethylmaleimide-sensitive factor	-0.445654	8.43482	-4.61043	0.00366103	0.0193364	-2.02067	8.18314	8.24085	8.69691	8.61839
16886818	NM_001145909	TANC1	tetratricopeptide repeat, ankyrin repeat and coiled-coil containing 1	0.471317	8.16254	4.61043	0.00366104	0.0193364	-2.02067	8.4536	8.34279	7.87567	7.97808
16811286	NM_018357	LARP6	La ribonucleoprotein domain family, member 6	0.427561	6.33218	4.60902	0.00366648	0.019338	-2.02231	6.54781	6.54411	6.10581	6.131
16999011	NM_020177	FEM1C	fem-1 homolog c (C. elegans)	0.442506	8.10386	4.60871	0.00366766	0.019338	-2.02267	8.28039	8.36983	7.88221	7.883
16675794	NM_001167738	NAV1	neuron navigator 1	0.443824	8.07162	4.60838	0.00366892	0.019338	-2.02305	8.25317	8.33389	7.87295	7.82646
16881838	NM_000189	HK2	hexokinase 2	0.46764	7.38308	4.60832	0.00366917	0.019338	-2.02312	7.66658	7.56721	7.20184	7.09668
17009117	NM_001171992	C6orf223	chromosome 6 open reading frame 223	0.622916	6.54447	4.60373	0.00368687	0.0194209	-2.02844	6.68581	7.02604	6.25037	6.21565
16752652	NM_207344	SPRYD4	SPRY domain containing 4	-0.515765	7.11163	-4.60249	0.00369168	0.0194359	-2.02987	6.77678	6.9307	7.44751	7.29151
16691486	NM_017686	GDAP2	ganglioside induced differentiation associated protein 2	0.432265	7.48326	4.6013	0.00369628	0.0194498	-2.03125	7.67387	7.72492	7.25411	7.28016
16869562	ENST00000533683	SAMD1	sterile alpha motif domain containing 1	-0.46269	7.85806	-4.60031	0.00370012	0.0194596	-2.0324	7.56917	7.68425	8.05228	8.12652
16940036	NM_015004	EXOSC7	exosome component 7	0.436596	7.30293	4.59905	0.00370503	0.0194751	-2.03386	7.55836	7.48409	7.08358	7.08568
16778468	NM_004294	MTRF1	mitochondrial translational release factor 1	-0.469036	7.19326	-4.59846	0.00370733	0.0194768	-2.03455	7.01017	6.9073	7.48168	7.37387
16747566	NR_002803	RPL13P5	ribosomal protein L13 pseudogene 5	-0.586494	6.87779	-4.59619	0.00371615	0.0195127	-2.03717	6.72639	6.4427	7.11581	7.22627
17069989	NM_003218	TERF1	telomeric repeat binding factor (NIMA-interacting) 1	-0.450445	6.54724	-4.59374	0.00372575	0.0195528	-2.04002	6.30733	6.3367	6.71795	6.82698
16740524	NM_032193	RNASEH2C	ribonuclease H2, subunit C	-0.449674	7.23286	-4.58949	0.00374243	0.0196273	-2.04495	7.03857	6.97747	7.41069	7.50469
16708780	NM_017649	CNNM2	cyclin M2	-0.644498	6.44584	-4.58911	0.00374393	0.0196273	-2.04539	6.08035	6.16684	6.59029	6.94589
17118852	NR_003026	SNORA1	small nucleolar RNA, H/ACA box 1	0.648121	6.26278	4.58739	0.00375071	0.0196524	-2.04739	6.75756	6.41613	5.86765	6.0098
17020620	NM_018368	LMBRD1	LMBR1 domain containing 1	-0.436785	6.27163	-4.58632	0.00375492	0.0196613	-2.04863	6.09017	6.0163	6.5038	6.47625
17091043	NM_001282611	OLFM1	olfactomedin 1	-0.452248	6.52494	-4.58595	0.00375638	0.0196613	-2.04906	6.33912	6.25852	6.79458	6.70755
16829024	NM_001282683	FBXO31	F-box protein 31	0.429857	7.92054	4.58441	0.00376245	0.0196815	-2.05084	8.1127	8.15824	7.6914	7.71982
16852997	NM_004232	SOCS6	suppressor of cytokine signaling 6	0.568958	7.01199	4.5834	0.00376646	0.0196815	-2.05202	7.15836	7.43458	6.76596	6.68907
16842766	NM_006923	SDF2	stromal cell-derived factor 2	-0.578477	7.23199	-4.58301	0.00376802	0.0196815	-2.05247	6.83831	7.04719	7.41534	7.62712
17117748	BC127803	LOC100506596	uncharacterized LOC100506596	-0.611435	5.61585	-4.58296	0.00376821	0.0196815	-2.05253	5.47124	5.14903	5.8796	5.96354
17089542	ENST00000492588	C9orf16	chromosome 9 open reading frame 16	0.479003	6.59182	4.58106	0.00377575	0.0197009	-2.05473	6.85873	6.80391	6.2724	6.43223
16663133	NM_004700	KCNQ4	potassium voltage-gated channel, KQT-like subfamily, member 4	0.458311	5.70029	4.58037	0.0037785	0.0197009	-2.05554	5.96524	5.89365	5.52677	5.41549
17061430	NR_039981	LINC01004	long intergenic non-protein coding RNA 1004	-0.657886	6.03207	-4.58017	0.00377931	0.0197009	-2.05578	5.72513	5.68113	6.17201	6.55001
16873071	NM_019108	SMG9	SMG9 nonsense mediated mRNA decay factor	-0.517939	9.61494	-4.57959	0.0037816	0.0197009	-2.05644	9.34077	9.37117	9.76221	9.9856
16764964	NM_033448	KRT71	keratin 71	-0.513936	6.42208	-4.57952	0.0037819	0.0197009	-2.05653	6.19856	6.13166	6.57417	6.78392
16662755	NM_012090	MACF1	microtubule-actin crosslinking factor 1	0.439954	9.45441	4.57885	0.00378453	0.0197043	-2.0573	9.71942	9.62935	9.231	9.23786
16671129	NM_001195571	PRR9	proline rich 9	0.635712	6.242	4.57698	0.00379202	0.0197242	-2.05948	6.38197	6.73775	5.94747	5.90082
17023646	NM_001901	CTGF	connective tissue growth factor	-0.538182	6.52947	-4.57632	0.00379466	0.0197242	-2.06025	6.37611	6.14465	6.7493	6.84783
16689734	ENST00000433544	LOC100132240	uncharacterized LOC100132240	0.449007	6.24699	4.57584	0.00379654	0.0197242	-2.0608	6.51626	6.42674	5.98749	6.05749
16732419	NM_001198670	TMEM136	transmembrane protein 136	0.425965	7.05109	4.57507	0.00379964	0.0197242	-2.0617	7.28281	7.24534	6.83853	6.83769
16966712	NR_024031	DANCR	differentiation antagonizing non-protein coding RNA	-0.429514	6.34291	-4.57505	0.00379972	0.0197242	-2.06172	6.11774	6.13855	6.53163	6.5837
17118860	NR_001453	SNORD14C	small nucleolar RNA, C/D box 14C	-0.579526	8.84705	-4.5749	0.00380033	0.0197242	-2.0619	8.45749	8.65707	9.24864	9.02498
17045708	NM_031449	ZMIZ2	zinc finger, MIZ-type containing 2	0.545072	8.63501	4.57419	0.00380316	0.0197282	-2.06272	8.87652	8.93858	8.23612	8.48883
17087992	NM_017832	FAM206A	family with sequence similarity 206, member A	0.46594	7.32837	4.57371	0.0038051	0.0197282	-2.06328	7.53105	7.59164	7.16291	7.02789
16906477	NM_014362	HIBCH	3-hydroxyisobutyryl-CoA hydrolase	-0.434337	5.52661	-4.57259	0.00380957	0.019741	-2.06458	5.2768	5.34208	5.76238	5.72517
16667011	ENST00000394583	ZNF326	zinc finger protein 326	-0.689766	7.96263	-4.57191	0.00381232	0.0197449	-2.06537	7.42614	7.80936	8.23087	8.38416
17019169	NM_001136017	CCND3	cyclin D3	-0.681588	5.65243	-4.56969	0.00382123	0.0197801	-2.06795	5.47296	5.15032	5.87066	6.11579
17062592	NM_024523	GCC1	GRIP and coiled-coil domain containing 1	0.611328	5.71608	4.56894	0.00382428	0.0197801	-2.06883	6.08779	5.95569	5.25659	5.56424
17051441	NM_001134336	STRIP2	striatin interacting protein 2	-0.506353	6.71806	-4.56873	0.00382512	0.0197801	-2.06908	6.56222	6.36755	6.92988	7.0126
16776493	NM_001242881	CARKD	carbohydrate kinase domain containing	0.474038	8.60404	4.56813	0.00382753	0.0197823	-2.06977	8.87981	8.8023	8.29531	8.43872
16822408	NM_003502	AXIN1	axin 1	0.482442	7.60119	4.56759	0.00382972	0.0197832	-2.0704	7.86655	7.81827	7.44496	7.27497
16892039	NM_001191037	PSMD1	proteasome (prosome, macropain) 26S subunit, non-ATPase, 1	-0.430008	10.0951	-4.56676	0.00383307	0.0197902	-2.07137	9.90724	9.85294	10.2958	10.3244
17104217	NM_007157	ZXDB	zinc finger, X-linked, duplicated B	0.427432	7.76175	4.56429	0.00384305	0.0197939	-2.07424	7.99263	7.9583	7.56699	7.52907
16845259	NM_001040431	COA3	cytochrome c oxidase assembly factor 3	-0.50654	8.78715	-4.56364	0.0038457	0.0197939	-2.075	8.45218	8.61557	9.10838	8.97245
16847247	ENST00000516403	RNU2-58P	RNA, U2 small nuclear 58, pseudogene	-0.700714	5.79595	-4.56341	0.00384664	0.0197939	-2.07527	5.5587	5.33249	5.96675	6.32587
16996298	NM_001190981	IL6ST	interleukin 6 signal transducer	0.443592	9.68371	4.56326	0.00384725	0.0197939	-2.07544	9.8758	9.93522	9.50445	9.41939
16995333	AK000901	LOC646719	uncharacterized LOC646719	-0.54485	5.55725	-4.56325	0.00384729	0.0197939	-2.07546	5.1659	5.40375	5.88403	5.77532
16960442	NM_053024	PFN2	profilin 2	-0.428187	8.5607	-4.56322	0.00384739	0.0197939	-2.07548	8.33389	8.35932	8.79924	8.75034
16947287	NM_001184717	TIPARP	TCDD-inducible poly(ADP-ribose) polymerase	0.460342	9.86311	4.56312	0.0038478	0.0197939	-2.0756	10.1398	10.0468	9.58088	9.685
16658690	NM_005026	PIK3CD	phosphatidylinositol-4,5-bisphosphate 3-kinase, catalytic subunit delta	0.502197	5.8005	4.55839	0.00386706	0.0198772	-2.08111	6.10584	5.99737	5.46106	5.63776
16859788	NM_017712	PGPEP1	pyroglutamyl-peptidase I	0.594969	7.52896	4.55815	0.00386803	0.0198772	-2.08139	7.67955	7.97335	7.29356	7.1694
17069605	NM_001204173	C8orf44-SGK3	C8orf44-SGK3 readthrough	-0.745626	6.11327	-4.5569	0.00387315	0.0198862	-2.08285	5.52773	5.95318	6.58282	6.38934
16950999	NM_144636	CHCHD4	coiled-coil-helix-coiled-coil-helix domain containing 4	0.596465	6.09433	4.5562	0.00387602	0.0198862	-2.08367	6.34661	6.43852	5.9498	5.6424
16788142	NM_003384	VRK1	vaccinia related kinase 1	-0.42305	7.12609	-4.5555	0.0038789	0.0198862	-2.08449	6.91654	6.91258	7.35223	7.323
16717314	NM_000195	HPS1	Hermansky-Pudlak syndrome 1	0.427188	7.0203	4.55543	0.00387916	0.0198862	-2.08456	7.2526	7.21519	6.7873	6.82611
17042984	NM_001243794	CHST12	carbohydrate (chondroitin 4) sulfotransferase 12	-0.478888	7.67195	-4.55527	0.00387985	0.0198862	-2.08476	7.36568	7.49932	7.96643	7.85635
17078558	NM_018440	PAG1	phosphoprotein membrane anchor with glycosphingolipid microdomains 1	-0.826294	5.35862	-4.55319	0.00388838	0.0199196	-2.08718	5.19603	4.69492	5.6703	5.87324
17124008	NM_001039937	INTS6	integrator complex subunit 6	-0.437336	8.45263	-4.55096	0.00389755	0.0199544	-2.08978	8.21406	8.25386	8.71194	8.63065
16841982	NM_001033551	TOM1L2	target of myb1-like 2 (chicken)	0.42706	8.87437	4.54979	0.00390236	0.0199544	-2.09114	9.10784	9.06796	8.64139	8.68029
16912130	NM_003650	CST7	cystatin F (leukocystatin)	0.429356	10.604	4.54945	0.00390377	0.0199544	-2.09154	10.8344	10.803	10.3607	10.418
16757098	NM_001291424	SH2B3	SH2B adaptor protein 3	0.461945	7.88594	4.54922	0.00390472	0.0199544	-2.09181	8.07973	8.1541	7.59259	7.71735
16920497	NM_000782	CYP24A1	cytochrome P450, family 24, subfamily A, polypeptide 1	-0.549072	7.99417	-4.54908	0.00390527	0.0199544	-2.09197	7.85354	7.58572	8.27874	8.25867
16998588	NR_103754	LINC00491	long intergenic non-protein coding RNA 491	-0.790552	6.02598	-4.54472	0.00392334	0.0200265	-2.09706	5.86037	5.40103	6.5322	6.31031
16838887	NM_001270888	SLC25A10	solute carrier family 25 (mitochondrial carrier; dicarboxylate transporter), member 10	-0.549043	9.20937	-4.5447	0.00392343	0.0200265	-2.09709	8.99866	8.87104	9.3654	9.60239
16926200	NM_173354	SIK1	salt-inducible kinase 1	0.43604	7.3697	4.54043	0.00394116	0.0201066	-2.10206	7.60908	7.56637	7.19112	7.11224
16878443	NM_005253	FOSL2	FOS-like antigen 2	0.563833	7.98497	4.53965	0.00394444	0.020113	-2.10298	8.13994	8.39384	7.77005	7.63606
16875848	NM_001002836	ZNF787	zinc finger protein 787	0.632546	7.61493	4.53782	0.00395208	0.0201318	-2.10512	7.97679	7.88561	7.12393	7.47337
16856187	NM_004359	CDC34	cell division cycle 34	0.434576	7.80761	4.53779	0.00395221	0.0201318	-2.10515	8.0614	7.98839	7.61324	7.56739
16916920	NM_005116	SLC23A2	solute carrier family 23 (ascorbic acid transporter), member 2	-0.435441	8.27874	-4.53715	0.00395488	0.0201351	-2.1059	8.07022	8.05181	8.53994	8.45297
16721401	NM_144666	DNHD1	dynein heavy chain domain 1	0.534264	5.44995	4.53368	0.00396942	0.0201987	-2.10995	5.59065	5.8435	5.18	5.18563
16688420	NM_017768	LRRC40	leucine rich repeat containing 40	-0.421956	7.89339	-4.53207	0.00397622	0.0202229	-2.11184	7.68817	7.67665	8.12218	8.08655
16838855	NM_004712	HGS	hepatocyte growth factor-regulated tyrosine kinase substrate	0.435656	9.38358	4.53147	0.00397874	0.0202253	-2.11254	9.55866	9.64416	9.15011	9.1814
17093724	NM_032818	ARHGEF39	Rho guanine nucleotide exchange factor (GEF) 39	-0.707223	6.90263	-4.52766	0.00399486	0.0202882	-2.117	6.37389	6.72415	7.12654	7.38595
16705474	NM_001256910	DDX21	DEAD (Asp-Glu-Ala-Asp) box helicase 21	0.419629	10.4248	4.52757	0.00399523	0.0202882	-2.1171	10.6277	10.6415	10.2233	10.2067
16739026	NM_001161452	CYB561A3	cytochrome b561 family, member A3	-0.455909	6.32411	-4.52587	0.00400242	0.0203143	-2.11908	6.03549	6.15682	6.51885	6.58527
17084237	NM_001539	DNAJA1	DnaJ (Hsp40) homolog, subfamily A, member 1	-0.614017	8.55804	-4.52293	0.00401492	0.0203673	-2.12253	8.25676	8.24529	8.69308	9.03701
16833171	NM_015544	TMEM98	transmembrane protein 98	-0.537084	7.57641	-4.52187	0.00401944	0.0203786	-2.12377	7.42704	7.18869	7.79546	7.89443
16770142	NM_001244974	PPP1CC	protein phosphatase 1, catalytic subunit, gamma isozyme	-0.431451	8.56009	-4.52144	0.00402127	0.0203786	-2.12427	8.30395	8.38478	8.78107	8.77057
16795720	NM_017970	NRDE2	NRDE-2, necessary for RNA interference, domain containing	-0.494087	6.01826	-4.51886	0.00403229	0.0204239	-2.12729	5.67024	5.87218	6.26766	6.26294
16849910	NM_001039842	OXLD1	oxidoreductase-like domain containing 1	0.486143	6.68435	4.51693	0.0040406	0.0204451	-2.12956	7.02047	6.83438	6.42054	6.46203
17044302	NM_138771	CCDC126	coiled-coil domain containing 126	-0.720271	5.36387	-4.51692	0.00404061	0.0204451	-2.12956	5.22862	4.77884	5.72176	5.72624
16724607	NM_004551	NDUFS3	NADH dehydrogenase (ubiquinone) Fe-S protein 3, 30kDa (NADH-coenzyme Q reductase)	-0.517236	7.32526	-4.51596	0.00404473	0.0204466	-2.13069	6.96407	7.16922	7.64014	7.52762
17056992	NM_000168	GLI3	GLI family zinc finger 3	-0.441446	10.0687	-4.51569	0.00404591	0.0204466	-2.13101	9.90238	9.7936	10.2821	10.2968
16980051	NM_001130675	CLGN	calmegin	0.609415	5.59778	4.51541	0.00404712	0.0204466	-2.13134	5.7907	6.01427	5.42139	5.16475
16798801	NM_001039841	ARHGAP11B	Rho GTPase activating protein 11B	-0.643187	8.14842	-4.51346	0.00405549	0.0204724	-2.13362	7.64015	8.01351	8.45047	8.48956
16993156	OTTHUMT00000373233	RP11-1277A3.1	novel transcript	0.578041	6.06463	4.51314	0.00405688	0.0204724	-2.134	6.50569	6.20162	5.75507	5.79616
16950539	ENST00000517687	LOC101930660	uncharacterized LOC101930660	-0.600123	5.36953	-4.51278	0.00405843	0.0204724	-2.13442	5.16837	4.97058	5.53696	5.80223
16836492	NM_018304	PRR11	proline rich 11	-0.420862	9.35274	-4.51139	0.00406443	0.020483	-2.13605	9.14185	9.14276	9.58446	9.54188
16668047	NM_007269	STXBP3	syntaxin binding protein 3	-0.421986	7.50755	-4.51133	0.00406467	0.020483	-2.13612	7.27417	7.31895	7.70894	7.72815
16913065	NM_006404	PROCR	protein C receptor, endothelial	-0.664559	6.05001	-4.50946	0.00407277	0.0205133	-2.13831	5.90331	5.53215	6.31143	6.45314
16940615	uc010hkn.2	WDR6	WD repeat domain 6	-0.457113	6.98547	-4.50817	0.00407837	0.0205311	-2.13983	6.82689	6.68693	7.19707	7.23098
16873183	NM_001278508	ZNF180	zinc finger protein 180	-0.505526	6.14193	-4.50641	0.00408599	0.0205589	-2.14189	5.9278	5.85053	6.49761	6.29177
16967005	NM_020722	KIAA1211	KIAA1211	0.418058	6.02431	4.5057	0.00408909	0.0205641	-2.14273	6.22213	6.24455	5.80846	5.8221
16860920	NM_144779	FXYD5	FXYD domain containing ion transport regulator 5	0.422258	8.46166	4.50353	0.00409855	0.0205975	-2.14527	8.66184	8.68375	8.22607	8.275
16931339	NM_001001928	PPARA	peroxisome proliferator-activated receptor alpha	0.580417	5.90432	4.50209	0.00410483	0.0205975	-2.14696	6.34124	6.04782	5.56253	5.6657
16811994	NM_024776	PEAK1	pseudopodium-enriched atypical kinase 1	-0.540604	6.72028	-4.50204	0.00410503	0.0205975	-2.14702	6.33649	6.56347	7.05918	6.92198
17086208	NM_001282748	TLE4	transducin-like enhancer of split 4	-0.456692	5.46217	-4.50185	0.00410587	0.0205975	-2.14724	5.26875	5.1989	5.75372	5.62732
17121444	NM_000296	PKD1	polycystic kidney disease 1 (autosomal dominant)	0.497692	8.34037	4.50169	0.00410655	0.0205975	-2.14743	8.48778	8.69065	8.0648	8.11824
16853828	NM_001042388	PPP4R1	protein phosphatase 4, regulatory subunit 1	-0.420991	9.01636	-4.5013	0.00410825	0.0205975	-2.14788	8.78666	8.82506	9.21209	9.24161
17104947	NM_006517	SLC16A2	solute carrier family 16, member 2 (thyroid hormone transporter)	0.449004	7.51032	4.49985	0.00411462	0.020619	-2.14959	7.74633	7.72331	7.34968	7.22195
16758135	NM_001080825	TMEM120B	transmembrane protein 120B	0.489962	6.46463	4.49826	0.00412159	0.0206435	-2.15146	6.64175	6.77746	6.14668	6.29261
16710548	NM_006504	PTPRE	protein tyrosine phosphatase, receptor type, E	0.431913	7.31477	4.49448	0.00413819	0.0207161	-2.15589	7.4971	7.56434	7.12911	7.06851
16705381	NM_030625	TET1	tet methylcytosine dioxygenase 1	-0.462591	5.92837	-4.49359	0.0041421	0.0207252	-2.15694	5.77516	5.61899	6.16558	6.15375
17120158	NR_027995	ANKRD20A9P	ankyrin repeat domain 20 family, member A9, pseudogene	0.510645	7.10609	4.49241	0.00414733	0.0207409	-2.15833	7.37823	7.3446	6.73758	6.96396
17084838	NM_021111	RECK	reversion-inducing-cysteine-rich protein with kazal motifs	-0.513766	5.50145	-4.49119	0.00415273	0.0207574	-2.15977	5.32976	5.15936	5.8379	5.67876
16936933	NM_001276325	SETMAR	SET domain and mariner transposase fusion gene	-0.487376	5.65792	-4.4898	0.00415886	0.0207758	-2.16139	5.31614	5.51232	5.90966	5.89355
16848755	NM_001005849	SUMO2	small ubiquitin-like modifier 2	-0.468742	9.80772	-4.4894	0.00416063	0.0207758	-2.16186	9.52354	9.62317	10.1096	9.97455
16671305	NM_001255978	CREB3L4	cAMP responsive element binding protein 3-like 4	-0.832232	5.41324	-4.48716	0.00417058	0.020815	-2.1645	4.722	5.27225	5.78728	5.87144
16854540	NM_004775	B4GALT6	UDP-Gal:betaGlcNAc beta 1,4- galactosyltransferase, polypeptide 6	-0.556912	6.65149	-4.48487	0.00418077	0.0208553	-2.16719	6.51547	6.2306	6.94718	6.91271
16760393	NM_014231	VAMP1	vesicle-associated membrane protein 1 (synaptobrevin 1)	-0.418818	6.34259	-4.48257	0.00419105	0.0208961	-2.1699	6.12399	6.14237	6.5308	6.5732
16945137	ENST00000464431	ABTB1	ankyrin repeat and BTB (POZ) domain containing 1	0.427017	5.85664	4.4811	0.00419763	0.0209086	-2.17163	6.08984	6.05046	5.67775	5.60851
17125930	OTTHUMT00000466762	CTD-3138B18.5	novel transcript, antisense to ZNF544	-0.672576	5.82967	-4.48085	0.00419873	0.0209086	-2.17192	5.28871	5.69806	6.16746	6.16445
16814901	NM_004209	SYNGR3	synaptogyrin 3	0.477942	6.6173	4.48057	0.00419999	0.0209086	-2.17225	6.76679	6.94576	6.39989	6.35677
17119102	NR_039894	MIR4740	microRNA 4740	-0.585178	6.37353	-4.47979	0.00420349	0.0209086	-2.17317	6.22784	5.93405	6.60342	6.72883
16782434	NM_001277864	DHRS4L1	dehydrogenase/reductase (SDR family) member 4 like 1	-0.971684	6.67822	-4.47964	0.00420416	0.0209086	-2.17334	5.88228	6.50249	7.02544	7.3027
17010104	NM_001105531	FAM135A	family with sequence similarity 135, member A	0.426271	6.45918	4.47908	0.00420669	0.0209107	-2.17401	6.7088	6.63584	6.23246	6.25964
16847676	NM_002059	GH2	growth hormone 2	-0.582937	5.81891	-4.47713	0.00421547	0.0209438	-2.17631	5.40089	5.65399	6.20611	6.01464
16861895	NM_002503	NFKBIB	nuclear factor of kappa light polypeptide gene enhancer in B-cells inhibitor, beta	0.441141	8.37094	4.46805	0.00425652	0.0211328	-2.187	8.62329	8.55974	8.09961	8.20113
16785379	NM_021979	HSPA2	heat shock 70kDa protein 2	-0.646406	7.26155	-4.46777	0.00425778	0.0211328	-2.18732	6.75092	7.12578	7.54028	7.62923
16895772	NM_001035521	GTF3C2	general transcription factor IIIC, polypeptide 2, beta 110kDa	-0.513729	9.03287	-4.46723	0.00426027	0.0211345	-2.18797	8.65848	8.89353	9.30368	9.27579
16913413	NM_005417	SRC	SRC proto-oncogene, non-receptor tyrosine kinase	0.451118	6.89791	4.46546	0.00426834	0.021164	-2.19006	7.148	7.09894	6.60635	6.73835
16834351	NM_001042529	COASY	CoA synthase	0.419938	9.6556	4.46384	0.00427572	0.0211899	-2.19196	9.87867	9.85246	9.47253	9.41873
17076466	OTTHUMT00000376670	RP11-675F6.3	novel transcript	0.574296	7.48501	4.46195	0.00428436	0.0212134	-2.19419	7.73723	7.80709	7.34886	7.04687
16822637	NM_024164	TPSB2	tryptase beta 2 (gene/pseudogene)	0.4742	5.79523	4.46167	0.00428566	0.0212134	-2.19452	6.05128	6.01338	5.46943	5.64682
16728287	NM_018043	ANO1	anoctamin 1, calcium activated chloride channel	0.415389	11.1178	4.46071	0.00429005	0.0212134	-2.19565	11.31	11.341	10.9211	10.8992
16845826	NM_133373	PLCD3	phospholipase C, delta 3	0.471115	9.32798	4.46055	0.00429078	0.0212134	-2.19584	9.58453	9.54256	9.00662	9.17823
16765284	NM_001173466	AAAS	achalasia, adrenocortical insufficiency, alacrimia	-0.42497	7.50173	-4.4597	0.00429468	0.0212134	-2.19684	7.24959	7.3289	7.71778	7.71066
[truncated: 7,883 more rows]
