# Supplementary material for: A subset of CB002 xanthine analogs bypass p53-signaling to restore a p53 transcriptome and target an S-phase cell cycle checkpoint in tumors with mutated-p53
Source: eLife. 2021 Jul 29;10:e70429. doi: 10.7554/eLife.70429 (PMC8321552; doi:10.7554/eLife.70429)
Supplement: Figure 3—source data 1. [file elife-70429-fig3-data1.xlsx]

## Sheet: Table description
Supplemental table includes protein information of all proteins detected in DMSO vehicle control and analogue #4 SW480 treated cells at 24 hrs samples (performed in triplicates) analyzed by LC-MS/MS. The present table includes protein names and their expresson values without the FDR of 1% as a filter and therefore referred as raw proteomic data.

## Sheet: Proteins
Accession	Description	Exp. q-value: Combined	Sum PEP Score	Coverage [%]	# Peptides	# PSMs	# Unique Peptides	# AAs	MW [kDa]	calc. pI	Score Sequest HT: Sequest HT	# Peptides (by Search Engine): Sequest HT	Pfam IDs	Entrez Gene ID	Gene Symbol	Chromosome	Ensembl Gene ID	WikiPathways	KEGG Pathways	Reactome Pathways	# Protein Pathway Groups	# Razor Peptides	Abundance Ratio: (DMSO) / (T4)	Abundance Ratio Adj. P-Value: (DMSO) / (T4)	Abundance Ratio Variability [%]: (DMSO) / (T4)	Abundances (Grouped): DMSO	Abundances (Grouped): T4	Abundances (Grouped) CV [%]: DMSO	Abundances (Grouped) CV [%]: T4	Abundance: F1: Sample, DMSO	Abundance: F2: Sample, DMSO	Abundance: F3: Sample, DMSO	Abundance: F7: Sample, T4	Abundance: F8: Sample, T4	Abundance: F9: Sample, T4	Abundances Count: F1: Sample, DMSO	Abundances Count: F2: Sample, DMSO	Abundances Count: F3: Sample, DMSO	Abundances Count: F7: Sample, T4 (Analogue #4)	Abundances Count: F8: Sample, T4 (Analogue #4)	Abundances Count: F9: Sample, T4 (Analogue #4)	# Protein Groups	Modifications
EAW70162.1	heat shock 10kDa protein 1 (chaperonin 10), isoform CRA_h [OS=Homo sapiens]	0	51.873	100	6	98	1	47	5.2	4.72	189.94	6	Pf00166	3336	HSPE1	2	ENSG00000115541.10				0	0	1.631	0.0676635	42.02	118.5	72.6	2.33	38.03	133622616	116138016	121576968	104748656	73563488	45917956	1	1	1	1	1	1	1	Met-loss [N-Term]
NP_002296.1	Galectin-1 [OS=Homo sapiens]	0	168.247	96	16	215	16	135	14.7	5.5	517.16	16	Pf00337	3956	LGALS1	22	ENSG00000100097.11			Post-translational protein phosphorylation; Regulation of Insulin-like Growth Factor (IGF) transport and uptake by Insulin-like Growth Factor Binding Proteins (IGFBPs)	4	0	0.885	0.578989	25.54	101.8	106.4	2.3	0.29	5.93701e+08	5.39588e+08	5.86679e+08	5.94532e+08	5.82341e+08	5.75326e+08	14	14	15	15	14	14	1	Met-loss+Acetyl [N-Term]
NP_066932.1	Thymosin beta-4 [OS=Homo sapiens]	0	88.981	93	6	68	6	44	5.1	5.06	140.47	6	Pf01290	7114	TMSB4X	X	ENSG00000205542.10	TarBasePathway; Regulation of Actin Cytoskeleton	Regulation of actin cytoskeleton	Platelet degranulation	7	0	1.023	0.937759	53.04	102.2	99.7	25.26	18.6	1.71027e+08	2.42512e+08	2.61594e+08	1.79139e+08	2.5161e+08	2.40638e+08	6	6	6	6	6	6	1	Met-loss+Acetyl [N-Term]
NP_066926.1	thymosin beta-10 [OS=Homo sapiens]	0	96.351	93	7	108	7	44	5	5.36	240.65	7		9168	TMSB10	2	ENSG00000034510.5				0	0	1.731	0.0289471	44.5	128	74.8	3.53	3.26	6.63828e+08	5.6797e+08	588227277	3.59847e+08	3.43169e+08	328002923	7	6	6	6	6	6	1	Met-loss+Acetyl [N-Term]
AAA35714.1	retinol-binding protein, partial [OS=Homo sapiens]	0	255.933	93	14	221	3	121	14.3	4.88	764.51	14	Pf00061	5947	RBP1	3		Retinoblastoma (RB) in Cancer; Vitamin A and Carotenoid Metabolism			2	11	1.041	0.967226	33.31	111.1	95.7	10.16	6.33	7.6956e+08	5.52243e+08	6.3964e+08	5.94264e+08	5.23668e+08	5.18395e+08	14	14	14	14	14	14	1	Met-loss [N-Term]
CAA25918.1	unnamed protein product [OS=Homo sapiens]	0	45.601	92	1	37	1	39	4	4.55	274.47	1	Pf00080	6647	SOD1	21		Selenium Micronutrient Network; Vitamin B12 Metabolism; Folate Metabolism; AGE/RAGE pathway; Dopamine metabolism; Amyotrophic lateral sclerosis (ALS); Oxidative Stress			7	0	0.991	0.880822	4.41	109.3	110.5	2.5	7.69	7.12933e+07	5.92231e+07	65736686	6.62323e+07	6.31918e+07	5.5602e+07	1	1	1	1	1	1	1
EAW74448.1	cofilin 1 (non-muscle), isoform CRA_a [OS=Homo sapiens]	0	253.195	89	16	273	3	149	16.8	8.35	677.75	16	Pf00241	1072	CFL1	11	ENSG00000172757.12	Brain-Derived Neurotrophic Factor (BDNF) signaling pathway; VEGFA-VEGFR2 Signaling Pathway; EGF/EGFR Signaling Pathway; Regulation of Actin Cytoskeleton; G13 Signaling Pathway			5	13	1.146	0.898596	42.4	103.8	94.9	1.92	10	8.35579e+08	7.02132e+08	7.81392e+08	6.1583e+08	7.37895e+08	6.73519e+08	14	13	12	14	14	14	1
NP_002148.1	10 kDa heat shock protein, mitochondrial [OS=Homo sapiens]	0	102.963	88	15	200	2	102	10.9	8.92	352.02	15	Pf00166	3336	HSPE1	2	ENSG00000115541.10				0	13	1.048	0.970674	22.78	98.7	102.6	1.55	6.21	8.22388e+08	7.12814e+08	7.57868e+08	7.38992e+08	8.19631e+08	7.59808e+08	12	14	12	14	14	15	1
NP_000025.1	fructose-bisphosphate aldolase A isoform 1 [OS=Homo sapiens]	0	477.728	88	28	435	26	364	39.4	8.09	1340.32	28	Pf00274	226	ALDOA	16	ENSG00000149925.17	Glycolysis and Gluconeogenesis; Sudden Infant Death Syndrome (SIDS) Susceptibility Pathways	Fructose and mannose metabolism; Glycolysis / Gluconeogenesis; Carbon metabolism; Biosynthesis of amino acids; Metabolic pathways; Pentose phosphate pathway; HIF-1 signaling pathway	Platelet degranulation ; Gluconeogenesis; Glycolysis; Neutrophil degranulation	21	2	1.04	0.966327	35.94	110.4	85.3	6.57	8.66	2.56083e+09	2.01772e+09	2.15798e+09	1.88952e+09	1.58923e+09	1.59882e+09	28	28	27	27	26	27	1	Met-loss [N-Term]
NP_001243728.1	Glyceraldehyde-3-phosphate dehydrogenase isoform 2 [OS=Homo sapiens]	0	772.667	87	34	1504	3	293	31.5	7.61	5113.16	34	Pf00044, Pf02800	2597	GAPDH	12	ENSG00000111640.14	Cori Cycle; Alzheimers Disease; Glycolysis and Gluconeogenesis; Sudden Infant Death Syndrome (SIDS) Susceptibility Pathways			4	0	1.018	0.923017	1.69	100.8	99.1	4.23	3.56	661978112	6.23225e+08	6.3262e+08	6.02788e+08	6.25675e+08	5.82487e+08	1	1	1	1	1	1	1
NP_003281.1	tropomyosin alpha-4 chain isoform Tpm4.2cy [OS=Homo sapiens]	0	405.461	87	26	285	17	248	28.5	4.69	896.74	26	Pf00261, Pf12718	7171	TPM4	19	ENSG00000167460.14	Striated Muscle Contraction	Adrenergic signaling in cardiomyocytes; Hypertrophic cardiomyopathy (HCM); Cardiac muscle contraction; Dilated cardiomyopathy	Smooth Muscle Contraction; Striated Muscle Contraction	8	8	0.971	0.830899	34.85	108.1	95.1	3.19	2.37	8.55475e+08	789194372	8.59403e+08	7.1514e+08	7.17181e+08	7.29453e+08	24	24	24	23	23	24	1	Met-loss+Acetyl [N-Term]
AAB22818.1	fructose-1,6-bisphosphate aldolase A, aldolase A [OS=Homo sapiens]	0	20.279	87	2	24	2	15	1.8	6.37	57.97	2									0	0	1.033	0.953602	9.22	103.1	99.8	1.17	2.53	54973934	4.86496e+07	53424056	5.07473e+07	4.86209e+07	4.69361e+07	2	2	2	2	2	2	1
NP_004030.1	Annexin A2 isoform 2 [OS=Homo sapiens]	0	706.592	86	46	1142	46	339	38.6	7.75	2837.52	46	Pf00191	302	ANXA2	15	ENSG00000182718.16	Prostaglandin Synthesis and Regulation		Dissolution of Fibrin Clot; Gene and protein expression by JAK-STAT signaling after Interleukin-12 stimulation; Smooth Muscle Contraction; Neutrophil degranulation; Interleukin-12 family signaling	12	0	0.874	0.533196	31.49	93.6	105.1	10.6	8.07	4.6327e+09	4.91599e+09	5.28758e+09	5.00642e+09	5.64463e+09	5.63732e+09	45	47	45	43	45	45	1	Met-loss+Acetyl [N-Term]
BAF83540.1	unnamed protein product [OS=Homo sapiens]	0	241.398	86	15	378	15	165	18	6.9	806.57	15	Pf00160	5478	PPIA	7		Prolactin Signaling Pathway			1	0	0.926	0.71969	22.27	95.6	105.1	4.45	2.89	2.77956e+09	2.23351e+09	2.61063e+09	2.70994e+09	2.72678e+09	2.79298e+09	17	19	19	20	19	19	1	Met-loss [N-Term]; Met-loss+Acetyl [N-Term]
AAB32876.1	neuropolypeptide h3 [OS=Homo sapiens]	0	150.689	86	12	92	12	186	20.9	7.53	293.13	12	Pf01161								0	0	0.886	0.580481	37.29	89.5	109.7	8.02	9.9	1.78926e+08	1.33034e+08	1.59728e+08	1.87191e+08	2.1822e+08	1.84572e+08	12	12	12	10	11	11	1
NP_005685.1	cytochrome C oxidase copper chaperone [OS=Homo sapiens]	0	24.545	86	3	10	3	63	6.9	7.24	13.09	3	Pf05051	10063	COX17	3	ENSG00000138495.6	Electron Transport Chain; Copper homeostasis	Oxidative phosphorylation; Metabolic pathways	Mitochondrial protein import; Metabolism of proteins	6	0	1.59	0.0926966	15.33	140.9	66.9	17.88	12.03	9.88891e+06	8.22586e+06	6.61965e+06	4.11474e+06	3922661	4.82722e+06	3	3	3	3	2	2	1	Met-loss [N-Term]
NP_003371.2	Vimentin [OS=Homo sapiens]	0	586.726	86	52	569	48	466	53.6	5.12	1437.93	52	Pf00038, Pf04111, Pf04156, Pf04732, Pf05622, Pf10186	7431	VIM	10	ENSG00000026025.15	Allograft Rejection; Spinal Cord Injury; Primary Focal Segmental Glomerulosclerosis FSGS; Apoptosis-related network due to altered Notch3 in ovarian cancer; Striated Muscle Contraction; TGF-B Signaling in Thyroid Cells for Epithelial-Mesenchymal Transition; T-Cell antigen Receptor (TCR) Signaling Pathway	MicroRNAs in cancer; Epstein-Barr virus infection	Interleukin-4 and 13 signaling; Caspase-mediated cleavage of cytoskeletal proteins; Striated Muscle Contraction	20	2	1.026	0.941075	33.12	100.1	97.1	15	17.46	1.55122e+09	1.73537e+09	1.97017e+09	1.3202e+09	1.73805e+09	1.80416e+09	47	45	46	47	46	45	1
NP_821133.1	tubulin beta chain isoform b [OS=Homo sapiens]	0	776.978	86	39	1110	4	444	49.6	4.89	3125.54	39	Pf00091, Pf03953, Pf10644	203068	TUBB	6; CHR_HSCHR6_MHC_MANN_CTG1; CHR_HSCHR6_MHC_COX_CTG1; CHR_HSCHR6_MHC_APD_CTG1; CHR_HSCHR6_MHC_DBB_CTG1; CHR_HSCHR6_MHC_MCF_CTG1; CHR_HSCHR6_MHC_QBL_CTG1; CHR_HSCHR6_MHC_SSTO_CTG1	ENSG00000232575.10; ENSG00000196230.12; ENSG00000227739.10; ENSG00000224156.10; ENSG00000235067.10; ENSG00000229684.10; ENSG00000183311.16; ENSG00000232421.10	Pathogenic Escherichia coli infection; Parkin-Ubiquitin Proteasomal System pathway	Pathogenic Escherichia coli infection; Gap junction; Phagosome	Neutrophil degranulation; Regulation of PLK1 Activity at G2/M Transition; AURKA Activation by TPX2; Anchoring of the basal body to the plasma membrane; Recruitment of NuMA to mitotic centrosomes; Loss of Nlp from mitotic centrosomes; Recruitment of mitotic centrosome proteins and complexes	24	47	0.969	0.824388	40.52	101.8	95.7	3.77	12.33	3.8523e+09	3.4628e+09	3.94047e+09	2.82138e+09	3.51507e+09	3.33761e+09	44	46	45	44	44	50	1
AAH24038.1	Tubulin, beta 2c [OS=Homo sapiens]	0	773.351	85	38	1080	2	445	49.8	4.92	3038.61	38	Pf00091, Pf03953, Pf10644	10383	TUBB4B	9		Pathogenic Escherichia coli infection; Parkin-Ubiquitin Proteasomal System pathway			2	7	0.99	0.876673	41.95	104	94.7	2.02	11.48	5.34992e+08	4.65262e+08	4.89566e+08	3.8615e+08	4.3818e+08	4.7321e+08	7	8	8	8	9	9	1
NP_001854.1	Cytochrome c oxidase subunit 6B1 [OS=Homo sapiens]	0	52.721	85	5	65	5	86	10.2	7.05	209.61	5	Pf02297	1340	COX6B1	19	ENSG00000126267.8	Electron Transport Chain	Non-alcoholic fatty liver disease (NAFLD); Cardiac muscle contraction; Alzheimer's disease; Huntington's disease; Metabolic pathways; Oxidative phosphorylation; Parkinson's disease	TP53 Regulates Metabolic Genes; Respiratory electron transport	17	0	1.051	0.972391	27.57	99.6	87.4	4.59	11.5	3.38043e+07	3.20114e+07	3.22909e+07	2.40346e+07	2.96907e+07	2.67181e+07	5	5	5	5	5	5	1	Met-loss+Acetyl [N-Term]
NP_005944.1	metallothionein-2 [OS=Homo sapiens]	0	64.6	84	5	43	2	61	6	7.83	115.99	5		4502	MT2A	16	ENSG00000125148.6	Copper homeostasis; Zinc homeostasis; Lung fibrosis	Mineral absorption	Metallothioneins bind metals; Interferon gamma signaling	11	3	0.845	0.422766	89.68	13.6	271.9	18.79	34.77	1.3267e+07	1.61982e+07	1.80159e+07	1.73086e+08	3.45107e+08	3.32315e+08	6	5	4	5	4	4	1	Acetyl [N-Term]
NP_002645.3	pyruvate kinase PKM isoform a [OS=Homo sapiens]	0	1030.44	83	54	1272	10	531	57.9	7.84	4183.42	54	Pf00224, Pf02887	5315	PKM	15	ENSG00000067225.17	Photodynamic therapy-induced HIF-1 survival signaling; Amino Acid metabolism; Glycolysis and Gluconeogenesis	Biosynthesis of amino acids; Type II diabetes mellitus; Carbon metabolism; Metabolic pathways; Glucagon signaling pathway; Purine metabolism; Viral carcinogenesis; Glycolysis / Gluconeogenesis; Pyruvate metabolism; Central carbon metabolism in cancer	Glycolysis; Neutrophil degranulation	20	48	0.955	0.799574	30.53	97.7	104.6	9.79	5.79	3.28187e+09	2.42373e+09	2.6468e+09	3.00949e+09	2.69283e+09	2.6354e+09	53	53	55	53	50	53	1	Met-loss+Acetyl [N-Term]
EAW87089.1	hCG1984476, isoform CRA_b [OS=Homo sapiens]	0	141.863	82	13	74	13	131	14.7	6.76	166.2	13	Pf00061								0	0	0.813	0.31431	29.72	84.5	107.4	21.38	11.8	1.03994e+08	63717621	6.95391e+07	9.89023e+07	7.69284e+07	8.33722e+07	12	12	12	13	13	13	1	Met-loss+Acetyl [N-Term]
AAO21313.1	lung cancer oncogene 7 [OS=Homo sapiens]	0	238.763	82	22	186	22	347	37.9	8.24	482.94	22	Pf00400								0	0	1.014	0.917268	35.37	103.3	95.9	6.44	4.1	5.01664e+08	3.8585e+08	4.40097e+08	4.23964e+08	3.88583e+08	3.8334e+08	21	20	21	20	20	21	1
EAW58049.1	alpha tubulin, isoform CRA_b [OS=Homo sapiens]	0	528.337	82	33	989	1	416	46.3	5.08	3058.29	33	Pf00091, Pf03953	10376	TUBA1B	12		Pathogenic Escherichia coli infection; Parkin-Ubiquitin Proteasomal System pathway			2	35	0.976	0.842096	31.96	96.4	102.7	5.9	8.62	2.87767e+09	2.5365e+09	3.03501e+09	2.52277e+09	2.79193e+09	2.91031e+09	33	34	33	33	35	34	1
NP_003555.1	transgelin-2 isoform b [OS=Homo sapiens]	0	152.166	82	16	146	16	199	22.4	8.25	382.04	16	Pf00307, Pf00402	8407	TAGLN2	1	ENSG00000158710.14			Platelet degranulation	4	0	1.154	0.890519	27.92	112.1	97.4	6.04	6.21	3.78315e+08	2.98374e+08	3.23692e+08	2.85855e+08	2.67811e+08	2.45721e+08	15	15	15	15	15	14	1	Met-loss+Acetyl [N-Term]
AAC39935.1	alpha enolase like 1, partial [OS=Homo sapiens]	0	394.025	82	21	721	1	269	29.5	5.82	2371.11	21	Pf00113, Pf13378								0	0	0.599	0.174956	26.57	78.8	131.5	3.78	20.92		407630	420216	538090	684896	802593		1	1	1	1	1	1
BAB15500.1	unnamed protein product [OS=Homo sapiens]	0	165.785	82	7	93	7	126	13.8	6.52	269.99	7	Pf01230, Pf11969	3094	HINT1	5					0	0	1.044	0.967812	19.47	99.2	100.7	7.76	2.41	3.37437e+08	2.56071e+08	2.8367e+08	2.89565e+08	2.71228e+08	2.71701e+08	6	7	7	7	7	7	1
NP_004915.2	alpha-actinin-4 isoform 1 [OS=Homo sapiens]	0	1432.57	81	94	1395	66	911	104.8	5.44	3912.31	94	Pf00307, Pf00435, Pf08726, Pf11971, Pf13499	81	ACTN4	19; CHR_HG26_PATCH	ENSG00000282844.1; ENSG00000130402.11	Arrhythmogenic Right Ventricular Cardiomyopathy; Primary Focal Segmental Glomerulosclerosis FSGS; Striated Muscle Contraction	Adherens junction; Arrhythmogenic right ventricular cardiomyopathy (ARVC); Regulation of actin cytoskeleton; Tight junction; Viral carcinogenesis; Systemic lupus erythematosus; Leukocyte transendothelial migration; Focal adhesion; Amoebiasis	Platelet degranulation ; Nephrin family interactions	18	30	0.849	0.438535	35.94	96.5	106.5	0.48	1.49	4.39669e+09	3.8677e+09	4.21223e+09	4.43592e+09	4.47852e+09	4.38011e+09	90	90	90	90	91	90	1
BAD96752.1	beta actin variant, partial [OS=Homo sapiens]	0	905.241	81	33	2577	1	375	41.7	5.59	8954.39	33	Pf00022	60	ACTB	7		Arrhythmogenic Right Ventricular Cardiomyopathy; Pathogenic Escherichia coli infection; Myometrial Relaxation and Contraction Pathways; Focal Adhesion; Fas Ligand (FasL) pathway and Stress induction of Heat Shock Proteins (HSP) regulation; Regulation of Actin Cytoskeleton			6	2	0.648	0.0191129	74.08	94.7	95.4	39.1	46.95	2.82528e+07	4.8171e+07	2.9186e+07	5.56745e+07	2.39274e+07	2.77159e+07	3	3	3	3	3	3	1	Met-loss+Acetyl [N-Term]
CAA45026.1	mutant beta-actin (beta'-actin) [OS=Homo sapiens]	0	815.386	81	32	1907	2	375	41.8	5.39	6083.83	32	Pf00022	60	ACTB	7		Arrhythmogenic Right Ventricular Cardiomyopathy; Pathogenic Escherichia coli infection; Myometrial Relaxation and Contraction Pathways; Focal Adhesion; Fas Ligand (FasL) pathway and Stress induction of Heat Shock Proteins (HSP) regulation; Regulation of Actin Cytoskeleton			6	0	0.01	1.62313e-16			187.7		13.85				1.49074e+06	1727810	1.30824e+06				1	1	1	1	Met-loss+Acetyl [N-Term]
NP_001605.1	Actin, cytoplasmic 2 [OS=Homo sapiens]	0	931.093	81	33	2550	1	375	41.8	5.48	8750.45	33	Pf00022	71	ACTG1	17	ENSG00000184009.9	Arrhythmogenic Right Ventricular Cardiomyopathy; Pathogenic Escherichia coli infection; Common Pathways Underlying Drug Addiction; Myometrial Relaxation and Contraction Pathways; Focal Adhesion; Fas Ligand (FasL) pathway and Stress induction of Heat Shock Proteins (HSP) regulation; Striated Muscle Contraction; Regulation of Actin Cytoskeleton	Regulation of actin cytoskeleton; Focal adhesion; Rap1 signaling pathway; Platelet activation; Tight junction; Vibrio cholerae infection; Salmonella infection; Phagosome; Dilated cardiomyopathy; Influenza A; Leukocyte transendothelial migration; Oxytocin signaling pathway; Shigellosis; Adherens junction; Hippo signaling pathway; Hypertrophic cardiomyopathy (HCM); Proteoglycans in cancer; Pathogen…	Signaling by BRAF and RAF fusions; Formation of annular gap junctions; Cell-extracellular matrix interactions; MAP2K and MAPK activation; Clathrin-mediated endocytosis; Interaction between L1 and Ankyrins; VEGFA-VEGFR2 Pathway; RHO GTPases activate IQGAPs; Signaling by RAS mutants; Recycling pathway of L1; Signaling by high-kinase activity BRAF mutants; Signaling by moderate kinase activity BRAF …	80	0	0.106	1.62313e-16	93	30.9	242.6	46.5	46.26	4.74496e+06	5.5265e+06	2.12477e+06	3.42852e+07	1.93034e+07	5.10302e+07	2	2	2	2	2	2	1	Met-loss+Acetyl [N-Term]
AAH01896.1	TUBB protein, partial [OS=Homo sapiens]	0	485.567	81	30	774	1	340	38.3	4.84	1734.75	30	Pf00091, Pf03953	203068	TUBB	6		Pathogenic Escherichia coli infection; Parkin-Ubiquitin Proteasomal System pathway			2	0	0.69	0.314528	17.24	87.4	127.4	18.84	11.32	650579	800293	661504	1.08019e+06	850180	908843	1	1	1	1	1	1	1	Acetyl [N-Term]
BAD96912.1	enolase 1 variant, partial [OS=Homo sapiens]	0	627.846	81	37	1120	8	434	47.2	7.39	3408.64	37	Pf00113, Pf03952, Pf13378	2023	ENO1	1		Glycolysis and Gluconeogenesis			1	29	0.942	0.766554	38.4	98.7	100.2	10.22	10.74	3.02358e+09	2.25814e+09	2.38426e+09	2.87191e+09	2.33044e+09	2.3516e+09	36	36	36	37	38	37	1
AAH08633.1	actin, beta, partial [OS=Homo sapiens]	0	899.699	81	33	2482	1	368	41	5.83	8490.27	33	Pf00022	60	ACTB	7		Arrhythmogenic Right Ventricular Cardiomyopathy; Pathogenic Escherichia coli infection; Myometrial Relaxation and Contraction Pathways; Focal Adhesion; Fas Ligand (FasL) pathway and Stress induction of Heat Shock Proteins (HSP) regulation; Regulation of Actin Cytoskeleton			6	47	0.838	0.399797	41.46	91.8	105.3	7.89	2.23	1.10643e+10	1.06993e+10	1.22961e+10	1.26605e+10	1.26898e+10	1.2878e+10	41	46	42	46	45	46	1
NP_006187.2	Poly(RC)-binding protein 1 [OS=Homo sapiens]	0	208.937	81	16	212	12	356	37.5	7.09	542.21	16	Pf00013, Pf13014	5093	PCBP1	2	ENSG00000169564.6		Spliceosome	mRNA Splicing - Major Pathway	5	4	1.077	0.99512	23.22	102.6	91.3	5.63	6.76	6.87828e+08	5.54118e+08	5.86899e+08	5.80633e+08	5.04856e+08	5.06155e+08	14	14	14	13	12	13	1	Acetyl [N-Term]
NP_000215.1	Keratin, type I cytoskeletal 18 [OS=Homo sapiens]	0	857.101	80	49	1493	38	430	48	5.45	4413.87	49	Pf00038	3875	KRT18	12	ENSG00000111057.10	Pathogenic Escherichia coli infection	Pathogenic Escherichia coli infection	Formation of the cornified envelope	5	12	0.856	0.464684	36.36	98.6	101.5	8.71	3.5	7.58018e+09	7.84853e+09	8.18874e+09	7.71644e+09	8.06027e+09	7.95676e+09	52	53	52	53	54	56	1
NP_001152759.1	triosephosphate isomerase isoform 2 [OS=Homo sapiens]	0	482.912	80	28	398	28	286	30.8	5.92	1370.74	28	Pf00121	7167	TPI1	12	ENSG00000111669.14	Fatty Acid Beta Oxidation; Cori Cycle; Glycolysis and Gluconeogenesis	Carbon metabolism; Biosynthesis of amino acids; Fructose and mannose metabolism; Metabolic pathways; Glycolysis / Gluconeogenesis; Inositol phosphate metabolism	Gluconeogenesis; Glycolysis	14	0	1.035	0.955683	27.49	103.6	97.5	11.61	6.54	1.86269e+09	1.3458e+09	1.44694e+09	1.44609e+09	1.24617e+09	1.29891e+09	26	27	26	25	25	27	1
ACF94484.1	epididymis luminal protein 176 [OS=Homo sapiens]	0	528.047	80	20	1839	1	223	25	5.66	7137.59	20	Pf00022	71	ACTG1	17		Arrhythmogenic Right Ventricular Cardiomyopathy; Pathogenic Escherichia coli infection; Myometrial Relaxation and Contraction Pathways; Focal Adhesion; Fas Ligand (FasL) pathway and Stress induction of Heat Shock Proteins (HSP) regulation; Striated Muscle Contraction; Regulation of Actin Cytoskeleton			7	0	0.766	0.449294	50.34	84.3	126.9	45.21	34.73	649946	1.40903e+06	934328	781075	1.60646e+06	1.32741e+06	1	1	1	1	1	1	1	Met-loss [N-Term]
NP_001269836.1	T-complex protein 1 subunit theta isoform 2 [OS=Homo sapiens]	0	342.721	80	36	286	1	529	57.6	5.39	641.62	36	Pf00118	10694	CCT8	21	ENSG00000156261.12				0	0	1.018	0.923616	4.03	99	97	3.32	3.05	37280778	31401250	33124485	31753844	31782748	32796543	1	1	1	1	1	1	1	Met-loss [N-Term]
NP_006576.2	T-complex protein 1 subunit theta isoform 1 [OS=Homo sapiens]	0	354.098	80	38	298	3	548	59.6	5.6	662.64	38	Pf00118	10694	CCT8	21	ENSG00000156261.12			BBSome-mediated cargo-targeting to cilium; Prefoldin mediated transfer of substrate to CCT/TriC; Cooperation of PDCL (PhLP1) and TRiC/CCT in G-protein beta folding; Association of TriC/CCT with target proteins during biosynthesis; Neutrophil degranulation; Folding of actin by CCT/TriC; Formation of tubulin folding intermediates by CCT/TriC	16	34	1.011	0.91118	28.18	102.3	97.7	10.82	8.05	6.97706e+08	5.1274e+08	5.47181e+08	5.79709e+08	4.88287e+08	5.02277e+08	32	35	34	35	35	36	1	Met-loss+Acetyl [N-Term]
EAW48010.1	ribosomal protein S12, isoform CRA_c [OS=Homo sapiens]	0	128.822	79	10	101	6	73	8.3	8.32	241.05	10	Pf01248	6206	RPS12	6		Cytoplasmic Ribosomal Proteins			1	4	1.01	0.91118	24.77	97.9	98.7	2.45	9.22	3.04806e+08	2.58427e+08	2.75697e+08	3.20134e+08	2.67727e+08	2.67229e+08	8	9	9	9	9	9	1
CAA67203.1	cytokeratin [OS=Homo sapiens]	0	591.736	79	37	1015	1	279	30.8	5.07	2394.48	37	Pf00038, Pf01576, Pf15003	3856	KRT8	12					0	0	1.011	0.91118	19.14	102.7	101.5	9.89	20.73	5.96133e+06	5.59381e+06	6.86907e+06	4.37149e+06	5715768	6.49565e+06	1	1	1	1	1	1	1
BAG59669.1	unnamed protein product [OS=Homo sapiens]	0	274.22	79	26	218	20	449	51.1	8.18	494.95	26	Pf00996	2665	GDI2	10					0	6	0.945	0.775855	22.12	98	99.9	0.83	4.69	3.09872e+08	2.72987e+08	2.99157e+08	2.9336e+08	2.87418e+08	3.09176e+08	25	25	25	24	22	25	1
NP_002128.1	heterogeneous nuclear ribonucleoproteins A2/B1 isoform A2 [OS=Homo sapiens]	0	464.316	79	31	362	1	341	36	8.65	905.45	31	Pf00076, Pf13893, Pf14259	3181	HNRNPA2B1	7	ENSG00000122566.20	mRNA Processing			1	0	1.581	0.138717	39.66	101	61.4	30.84	25.7	3.58862e+06	5.98975e+06	5.3431e+06	2.36563e+06	3.08889e+06	3.88652e+06	1	1	1	1	1	1	1	Acetyl [N-Term]
CAA25833.1	glyceraldehyde-3-phosphate dehydrogenase [OS=Homo sapiens]	0	778.895	79	35	1536	4	335	36	8.21	5174.9	35	Pf00044, Pf02800	2597	GAPDH	12					0	39	1.04	0.966722	41.44	98.4	103.7	7.04	3.51	4.38348e+09	3.35972e+09	3.74312e+09	3.92278e+09	3.58565e+09	3.72043e+09	41	42	41	43	43	42	1
BAD96744.1	tubulin alpha 6 variant, partial [OS=Homo sapiens]	0	467.401	78	31	706	5	449	49.8	5.14	2038.87	31	Pf00091, Pf03953	84790	TUBA1C	12		Pathogenic Escherichia coli infection; Parkin-Ubiquitin Proteasomal System pathway			2	0	0.92	0.704199	30.83	101.1	101.7	4.9	17.4	9.50008e+07	8.51997e+07	9.91184e+07	6.79373e+07	8.85833e+07	9.31007e+07	5	5	4	4	5	5	1
AAB19349.2	S3 ribosomal protein [OS=Homo sapiens]	0	204.156	78	23	264	23	243	26.7	9.69	584.09	23	Pf00189, Pf07650	6188	RPS3	11		Cytoplasmic Ribosomal Proteins			1	0	1.107	0.960997	27.12	103.1	94.7	6.39	5.71	4.73749e+08	3.9158e+08	4.83472e+08	4.38691e+08	3.92433e+08	3.85207e+08	20	20	21	22	21	22	1
NP_705935.1	tropomyosin alpha-3 chain isoform Tpm3.1cy [OS=Homo sapiens]	0	318.324	78	24	251	5	248	29	4.78	662.27	24	Pf00261, Pf12718	7170	TPM3	1	ENSG00000143549.19	Striated Muscle Contraction			1	11	1.1	0.968415	44.08	98.9	104.8	6.74	5.51	2.8186e+08	2.46265e+08	2.37629e+08	2.63844e+08	2.69384e+08	2.86109e+08	15	15	15	15	14	15	1	Met-loss+Acetyl [N-Term]
AAA36044.1	40 kDa keratin protein, partial [OS=Homo sapiens]	0	348.924	78	33	551	1	400	44.1	5.14	1188.32	33	Pf00038	3880	KRT19	17					0	0	0.846	0.678643	45.67	83.2	98.3		41.63			666178	563407		1.00543e+06			1	1		1	1
NP_002267.2	Keratin, type I cytoskeletal 19 [OS=Homo sapiens]	0	405.447	78	34	610	2	400	44.1	5.14	1422.37	34	Pf00038	3880	KRT19	17	ENSG00000171345.13			Formation of the cornified envelope	3	33	0.945	0.775239	38.71	99.2	100.8	9.23	7.69	2.5925e+09	2.70909e+09	2.83326e+09	2.56814e+09	2.93653e+09	2.71581e+09	34	34	33	35	33	35	1
BAG64624.1	unnamed protein product [OS=Homo sapiens]	0	112.08	78	10	101	2	112	12.5	6.6	317.78	10	Pf00241	1072	CFL1	11		Brain-Derived Neurotrophic Factor (BDNF) signaling pathway; VEGFA-VEGFR2 Signaling Pathway; EGF/EGFR Signaling Pathway; Regulation of Actin Cytoskeleton; G13 Signaling Pathway			5	0	0.736	0.11838	36.72	77.8	123.1	28.28	4.95	6.90258e+07	3.90871e+07	4.0288e+07	6.52502e+07	5.88104e+07	6.38713e+07	2	2	2	2	2	2	1	Met-loss+Acetyl [N-Term]
NP_002005.1	Peptidyl-prolyl cis-trans isomerase FKBP4 [OS=Homo sapiens]	0	348.358	78	31	251	31	459	51.8	5.43	548.86	31	Pf00254, Pf00515, Pf07719, Pf13174, Pf13371, Pf13414, Pf13424, Pf13432, Pf14559	2288	FKBP4	12	ENSG00000004478.7	Androgen receptor signaling pathway	Estrogen signaling pathway	Attenuation phase; HSP90 chaperone cycle for steroid hormone receptors (SHR)	8	0	0.961	0.804553	33.37	99.8	105.8	10.75	7.9	3.83464e+08	2.90637e+08	2.95985e+08	3.50124e+08	3.18271e+08	2.90726e+08	28	27	28	29	30	29	1	Met-loss [N-Term]
AAQ24860.1	Nucleophosmin [OS=Homo sapiens]	0	414.132	78	19	512	19	294	32.6	4.82	1743.31	19	Pf03066	4869	NPM1	5					0	0	1.082	0.988004	57.4	98.6	97.7	12.76	7.45	1.00755e+09	7.44444e+08	7.48488e+08	8.44519e+08	7.13756e+08	7.56546e+08	21	20	18	22	21	19	1	Acetyl [N-Term]
NP_003365.1	voltage-dependent anion-selective channel protein 1 [OS=Homo sapiens]	0	163.084	77	17	133	16	283	30.8	8.54	289.33	17	Pf01459	7416	VDAC1	5	ENSG00000213585.10		Calcium signaling pathway; Huntington's disease; Parkinson's disease; NOD-like receptor signaling pathway; Influenza A; HTLV-I infection; cGMP-PKG signaling pathway	Mitochondrial calcium ion transport; Ub-specific processing proteases; Mitochondrial protein import; Pink/Parkin Mediated Mitophagy	16	1	0.831	0.374726	31.14	88.9	117.1	12.25	8.69	2.38106e+08	1.73353e+08	1.80576e+08	240698242	240843150	2.02978e+08	16	16	15	16	16	15	1	Met-loss+Acetyl [N-Term]
EAW96654.1	keratin 8, isoform CRA_d [OS=Homo sapiens]	0	978.553	77	64	2338	2	561	62.1	5.97	6070.48	64	Pf00038, Pf01576, Pf05957, Pf06637, Pf12128, Pf13166, Pf13514, Pf15003	3856	KRT8	12					0	75	0.841	0.41051	46.99	90.5	106.6	11.48	3.2	9.84678e+09	1.05148e+10	1.15443e+10	1.24349e+10	1.29525e+10	1.27059e+10	70	72	71	69	70	70	1
AAN85571.1	Class II beta tubulin isotype [OS=Homo sapiens]	0	699.485	77	37	959	8	445	49.9	4.92	2745.18	37	Pf00091, Pf03953, Pf10644	7280	TUBB2A	6		Pathogenic Escherichia coli infection; Parkin-Ubiquitin Proteasomal System pathway			2	1	1.001	0.895456	38.39	90.1	108.5	25.71	16.7	131977430	1.81971e+08	2.09612e+08	1.75605e+08	2.26438e+08	2.37017e+08	9	9	9	9	9	9	1
NP_006078.2	tubulin beta-4A chain isoform 3 [OS=Homo sapiens]	0	557.429	77	30	828	2	444	49.6	4.88	2140.86	30	Pf00091, Pf03953, Pf10644	10382	TUBB4A	19	ENSG00000104833.11	Pathogenic Escherichia coli infection; Parkin-Ubiquitin Proteasomal System pathway	Pathogenic Escherichia coli infection; Phagosome; Gap junction	COPI-independent Golgi-to-ER retrograde traffic; COPI-dependent Golgi-to-ER retrograde traffic; Carboxyterminal post-translational modifications of tubulin; Regulation of PLK1 Activity at G2/M Transition; Recruitment of NuMA to mitotic centrosomes; Hedgehog 'off' state; Loss of Nlp from mitotic centrosomes; Translocation of GLUT4 to the plasma membrane; Prefoldin mediated transfer of substrate to…	72	1	0.605	0.00536768	96.28	13.2	271.4	45.4	12.36	2.76905e+06	1.23773e+06	3.64834e+06	4.55751e+07	5.72949e+07	5.11402e+07	3	2	3	2	2	2	1
AAH28356.1	Keratin 23 (histone deacetylase inducible) [OS=Homo sapiens]	0	367.824	76	33	352	33	422	48.1	6.54	713.91	33	Pf00038	25984	KRT23	17					0	0	1.002	0.898925	31.34	106.5	94	2.13	5.9	6.02088e+08	5.46776e+08	5.75258e+08	4.66981e+08	4.82604e+08	5.1101e+08	32	32	30	30	29	30	1	Acetyl [N-Term]
NP_112533.1	Heterogeneous nuclear ribonucleoproteins A2/B1 isoform B1 [OS=Homo sapiens]	0	463.726	76	31	367	1	353	37.4	8.95	905.56	31	Pf00076, Pf13893, Pf14259	3181	HNRNPA2B1	7	ENSG00000122566.20	mRNA Processing		Gene and protein expression by JAK-STAT signaling after Interleukin-12 stimulation; Interleukin-12 family signaling; mRNA Splicing - Major Pathway	10	31	1.127	0.925348	39.51	111.1	95.1	8.2	1.41	1.27858e+09	9.75612e+08	1.05212e+09	8.63788e+08	8.6319e+08	8.63682e+08	31	29	28	25	25	27	1
AAH24689.1	Similar to Elongation factor 2b, partial [OS=Homo sapiens]	0	480.396	76	38	584	21	517	57.5	6.93	1696.71	38	Pf00679, Pf03144, Pf03764, Pf14492	1938	EEF2	19		Translation Factors; AMP-activated Protein Kinase (AMPK) Signaling; Brain-Derived Neurotrophic Factor (BDNF) signaling pathway			3	17	0.998	0.890905	32.17	102.5	96.1	2.96	7.4	1.66149e+09	1.37036e+09	1.51364e+09	1.3967e+09	1.19239e+09	1.3382e+09	37	36	36	34	34	38	1
CAA57764.1	TSA, partial [OS=Homo sapiens]	0	145.267	75	13	113	1	164	18.3	5.38	321.71	13	Pf00578, Pf08534, Pf10417	7001	PRDX2	19		Selenium Micronutrient Network			1	0	0.988	0.872431	10.3	100.9	102.1	13.07	17.39	8191615	5.60451e+06	6.45714e+06	8161287	5.82192e+06	6.16343e+06	1	1	1	1	1	1	1
BAF84204.1	unnamed protein product [OS=Homo sapiens]	0	86.858	75	8	63	8	164	17.8	6.57	168.66	8	Pf00692	1854	DUT	15					0	0	1.492	0.185466	23.16	127.6	78	10.72	7.82	1.37425e+08	1.20756e+08	1.08027e+08	6.97056e+07	7.57883e+07	79239831	7	7	7	6	6	6	1	Met-loss [N-Term]
AAI07895.1	NME1-NME2 protein [OS=Homo sapiens]	0	226.272	75	17	207	9	292	32.6	8.48	435.86	17	Pf00334	654364	NME1-NME2	17	ENSG00000011052.21				0	9	1.187	0.823082	30.81	105.2	94.2	7.07	1.24	1.17701e+09	9.02441e+08	1003128310	8.70611e+08	8.38984e+08	8.53347e+08	18	17	17	16	16	17	1
EAW98602.1	phosphoglycerate kinase 1, isoform CRA_a [OS=Homo sapiens]	0	295.262	75	21	259	3	262	28.4	9.13	790.02	21	Pf00162	5230	PGK1	X		Photodynamic therapy-induced HIF-1 survival signaling; Glycolysis and Gluconeogenesis			2	0	1.032	0.951643	17.4	99.1	96.7	4.02	4.88	1.17524e+08	1.07155e+08	1.07554e+08	105965074	9.51292e+07	1.02682e+08	3	3	3	3	3	3	1	Met-loss+Acetyl [N-Term]
BAH13545.1	unnamed protein product [OS=Homo sapiens]	0	404.138	74	26	333	8	389	41.4	7.33	1078.41	26	Pf00162	5230	PGK1	X		Cori Cycle; Photodynamic therapy-induced HIF-1 survival signaling; Glycolysis and Gluconeogenesis			3	19	0.991	0.882075	26.45	102.1	101.2	4	3.18	1.10118e+09	9.04614e+08	9.70593e+08	9.90667e+08	9.26474e+08	9.07659e+08	26	26	27	27	26	27	1
NP_002565.1	peroxiredoxin-1 [OS=Homo sapiens]	0	332.26	73	24	351	21	199	22.1	8.13	883.17	24	Pf00578, Pf08534, Pf10417	5052	PRDX1	1	ENSG00000117450.13	Androgen receptor signaling pathway; Selenium Micronutrient Network; NRF2 pathway	Peroxisome	TP53 Regulates Metabolic Genes; Deregulated CDK5 triggers multiple neurodegenerative pathways in Alzheimer's disease models; Detoxification of Reactive Oxygen Species	15	3	0.995	0.890519	27.73	94.9	104	3.27	1.79	1.17532e+09	9.63979e+08	1.06521e+09	1.13186e+09	1.14309e+09	1.09952e+09	22	23	22	23	23	23	1
CAG38740.1	PCNA [OS=Homo sapiens]	0	174.357	73	16	181	1	261	28.7	4.64	618.89	16	Pf00705, Pf02747	5111	PCNA	20		Cell Cycle; Retinoblastoma (RB) in Cancer; EGF/EGFR Signaling Pathway; G1 to S cell cycle control; DNA Replication; Senescence and Autophagy in Cancer			6	0	0.896	0.618682	19.1	76.1	84.9	6.31	24.53	9656068	8757718	10358859	8977097	10098956	13862127	1	1	1	1	1	1	1
NP_002119.1	High mobility group protein B1 [OS=Homo sapiens]	0	298.849	73	22	348	17	215	24.9	5.74	894.82	22	Pf00505, Pf09011	3146	HMGB1	13	ENSG00000189403.14	Retinoblastoma (RB) in Cancer; DNA Damage Response (only ATM dependent)	Base excision repair	TRAF6 mediated NF-kB activation; Advanced glycosylation endproduct receptor signaling; TAK1 activates NFkB by phosphorylation and activation of IKKs complex; RIP-mediated NFkB activation via ZBP1; Activated TLR4 signalling; Interleukin-1 family signaling; Neutrophil degranulation; Regulation of TLR by endogenous ligand; DEx/H-box helicases activate type I IFN and inflammatory cytokines production…	40	5	1.087	0.981982	32.27	100.1	100.4	5.58	2.11	1.38367e+09	1.13534e+09	1.17578e+09	1.20033e+09	1.15037e+09	1.19115e+09	22	22	19	20	20	21	1
BAA25844.1	ribosomal protein L38, partial [OS=Homo sapiens]	0	46.314	73	4	56	4	37	4.3	9.72	72.92	4	Pf01781	6169	RPL38	17		Cytoplasmic Ribosomal Proteins			1	0	1.038	0.960997	14.14	95.4	98.3	5.94	0.45	6.29038e+07	5.24623e+07	5.304e+07	5.69267e+07	5.58491e+07	5.58402e+07	4	4	4	4	4	4	1
NP_057701.1	ubiquitin-fold modifier 1 isoform 1 precursor [OS=Homo sapiens]	0	32.325	73	3	14	3	85	9.1	9.31	70.49	3	Pf03671	51569	UFM1	13	ENSG00000120686.11				0	0	0.728	0.121977	29.14	69.2	78.4	47.31	20.1	4.19403e+06	2.38094e+06	6.70598e+06	4.77429e+06	3.1215e+06	4.25351e+06	2	2	3	2	2	2	1
BAF83004.1	unnamed protein product [OS=Homo sapiens]	0	162.79	73	12	167	1	135	15.9	5.11	550.77	12	Pf00061	5947	RBP1	3		Retinoblastoma (RB) in Cancer; Vitamin A and Carotenoid Metabolism			2	0	0.195	1.43492e-06	36.75	33.6	172.5	40.12	24.77	153562		81352.4		445645	630260	1		1		1	1	1	Met-loss [N-Term]
NP_066972.1	coactosin-like protein [OS=Homo sapiens]	0	76.614	73	9	40	9	142	15.9	5.67	63.04	9	Pf00241, Pf01453	23406	COTL1	16	ENSG00000103187.7			Neutrophil degranulation	3	0	0.92	0.703331	44.2	43.4	148	16.5	24.71	1.01757e+08	1.13658e+08	1.3453e+08	5.33581e+08	4.00977e+08	3.17085e+08	6	8	8	6	8	8	1	Met-loss+Acetyl [N-Term]
BAG52542.1	unnamed protein product [OS=Homo sapiens]	0	787.895	73	46	882	2	531	58.1	7.71	2818.94	46	Pf00224, Pf02887	5315	PKM	15		Photodynamic therapy-induced HIF-1 survival signaling; Glycolysis and Gluconeogenesis			2	0	0.93	0.735647	22.85	70.3	119.7	22.49	39.82	5726582	3.40287e+06	3.81506e+06	2.95677e+06	6.84992e+06	6125217	2	2	1	1	2	2	1	Met-loss+Acetyl [N-Term]
NP_115914.1	tubulin beta-6 chain isoform 1 [OS=Homo sapiens]	0	265.92	72	23	378	11	446	49.8	4.88	796.34	23	Pf00091, Pf03953, Pf10644	84617	TUBB6	18	ENSG00000176014.12	Pathogenic Escherichia coli infection; Parkin-Ubiquitin Proteasomal System pathway	Gap junction; Phagosome; Pathogenic Escherichia coli infection	COPI-independent Golgi-to-ER retrograde traffic; COPI-dependent Golgi-to-ER retrograde traffic; Carboxyterminal post-translational modifications of tubulin; Recruitment of NuMA to mitotic centrosomes; Hedgehog 'off' state; Translocation of GLUT4 to the plasma membrane; Prefoldin mediated transfer of substrate to CCT/TriC; Microtubule-dependent trafficking of connexons from Golgi to the plasma mem…	65	0	1.321	0.517679	46.26	188	53.9	2.5	8.69	1.69599e+08	1.41279e+08	1.59767e+08	4.32205e+07	4.96556e+07	4.31863e+07	9	9	9	9	9	9	1
CAG46598.1	PCNA, partial [OS=Homo sapiens]	0	195.105	72	17	182	2	261	28.7	4.69	623.67	17	Pf00705, Pf02747	5111	PCNA	20		Cell Cycle; Retinoblastoma (RB) in Cancer; EGF/EGFR Signaling Pathway; G1 to S cell cycle control; DNA Replication; Senescence and Autophagy in Cancer			6	15	1.104	0.966923	22.9	100	96.1	2.17	5.32	3.79756e+08	3.45096e+08	3.73424e+08	3.27979e+08	3.40886e+08	3.54954e+08	16	16	15	16	16	17	1
AAH14920.1	Unknown (protein for IMAGE:3906970), partial [OS=Homo sapiens]	0	144.371	72	10	108	4	191	21.1	5.83	294.81	10	Pf00011	3315	HSPB1	7		Apoptosis-related network due to altered Notch3 in ovarian cancer; Fas Ligand (FasL) pathway and Stress induction of Heat Shock Proteins (HSP) regulation; MAPK Signaling Pathway; VEGFA-VEGFR2 Signaling Pathway; p38 MAPK Signaling Pathway			5	6	1.04	0.96669	32.3	117.2	93.4	5.22	4.65	4.40262e+08	4.16616e+08	4.61875e+08	3.43358e+08	3.42999e+08	3.6459e+08	9	9	10	10	9	10	1
AAH68456.2	tyrosine 3-monooxygenase/tryptophan 5-monooxygenase activation protein, zeta polypeptide [OS=Homo sapiens]	0	227.751	72	19	363	1	245	27.7	4.79	587.27	19	Pf00244	7534	YWHAZ	8		Cell Cycle; Prolactin Signaling Pathway; Pathogenic Escherichia coli infection; Myometrial Relaxation and Contraction Pathways; Calcium Regulation in the Cardiac Cell; Sudden Infant Death Syndrome (SIDS) Susceptibility Pathways			6	0	1.199	0.801912	8.7	106.9	89.2	3.95	10.15	215402736	202706960	208223760	178315456	165071296	141851792	1	1	1	1	1	1	1	Acetyl [N-Term]
NP_000792.1	peptidyl-prolyl cis-trans isomerase FKBP1A isoform a [OS=Homo sapiens]	0	30.413	72	4	28	4	108	11.9	8.16	67.69	4	Pf00254	2280	FKBP1A	20	ENSG00000088832.16	Target Of Rapamycin (TOR) Signaling; Spinal Cord Injury; Calcium Regulation in the Cardiac Cell; TGF-beta Receptor Signaling		TGFBR2 Kinase Domain Mutants in Cancer; TGFBR1 LBD Mutants in Cancer; TGF-beta receptor signaling activates SMADs; TGF-beta receptor signaling in EMT (epithelial to mesenchymal transition); Calcineurin activates NFAT; TGFBR1 KD Mutants in Cancer	22	0	1.222	0.761092	28.87	107.6	97.4	17.13	9.83	5.89621e+07	4.18366e+07	40079358	4.39771e+07	3.53912e+07	3.88718e+07	3	3	4	3	4	4	1	Met-loss [N-Term]
CAA30894.1	glutathione S-transferase [OS=Homo sapiens]	0	240.549	72	14	236	14	210	23.4	5.64	902.12	14	Pf00043, Pf02798, Pf14497	2950	GSTP1	11		Photodynamic therapy-induced NFE2L2 (NRF2) survival signaling; Exercise-induced Circadian Regulation; Arachidonate Epoxygenase / Epoxide Hydrolase			3	0	0.993	0.884429	36.04	101.1	104.3	17.23	12.3	5.70906e+08	3.63252e+08	4.2274e+08	5.03476e+08	4.14584e+08	3.89036e+08	14	13	13	14	14	14	1	Met-loss [N-Term]
NP_002147.2	60 kDa heat shock protein, mitochondrial [OS=Homo sapiens]	0	785.768	71	46	1087	46	573	61	5.87	3517.61	46	Pf00118	3329	HSPD1	2	ENSG00000144381.16	Apoptosis-related network due to altered Notch3 in ovarian cancer; Sudden Infant Death Syndrome (SIDS) Susceptibility Pathways	Tuberculosis; Legionellosis; Type I diabetes mellitus; RNA degradation	TFAP2A acts as a transcriptional repressor during retinoic acid induced cell differentiation; Mitochondrial protein import; Metabolism of proteins	13	0	1.016	0.918221	36.41	81.6	122	6.04	5.16	1.94818e+09	1.53226e+09	1.6714e+09	2.52239e+09	2.37601e+09	2.21375e+09	46	48	48	46	46	49	1
CAG29335.1	RPLP1, partial [OS=Homo sapiens]	0	88.24	71	4	60	2	114	11.5	4.32	272.98	4	Pf00428	6176	RPLP1	15		Cytoplasmic Ribosomal Proteins			1	2	0.469	1.01066e-05	71.71	72.4	137.8	10.46	27.24	3.10326e+07	2.72692e+07	3.52588e+07	5.47136e+07	5.08012e+07	8.07249e+07	3	3	3	4	4	4	1
CAG47005.1	RpLP1 [OS=Homo sapiens]	0	75.678	71	4	47	2	114	11.6	4.37	190.8	4	Pf00428	6176	RPLP1	15		Cytoplasmic Ribosomal Proteins			1	0	2.184	0.000905945	3.22	125.9	44.3	23.51	10.47	7.20944e+06		4.89377e+06		2.08336e+06	1.78309e+06	2		1		1	1	1
NP_006820.1	Adipogenesis regulatory factor [OS=Homo sapiens]	0	43.873	71	3	16	3	76	7.9	5.31	69.25	3		10974	ADIRF; C10orf116	10	ENSG00000148671.13			Transcriptional regulation of white adipocyte differentiation	2	0	0.677	0.040217	57.21	76.5	131.2	28.74	32.02	3.11098e+07	4.52119e+07	3.22783e+07	65721208	3.27744e+07	5.2232e+07	3	2	3	3	2	3	1
NP_001869.1	Cellular retinoic acid-binding protein 2 [OS=Homo sapiens]	0	76.949	71	9	93	9	138	15.7	5.4	210.89	9	Pf00061, Pf14651	1382	CRABP2	1	ENSG00000143320.8	Vitamin A and Carotenoid Metabolism		Signaling by Retinoic Acid	4	0	1.042	0.967394	25.85	105.7	105.2	10.24	15.42	9.26916e+07	6.82046e+07	7.39138e+07	9.01839e+07	7.01751e+07	6.63847e+07	9	9	9	9	8	8	1
EAW91769.1	ribosomal protein L30, isoform CRA_a, partial [OS=Homo sapiens]	0	93.435	71	6	89	6	86	9.6	9.42	266.02	6	Pf01248	6156	RPL30	8		Selenium Metabolism and Selenoproteins; Cytoplasmic Ribosomal Proteins			2	0	0.944	0.773788	15.39	103.3	96.6	9.37	9.64	2.9562e+08	2.28864e+08	2.33971e+08	2.56922e+08	2.09321e+08	2.19514e+08	6	6	6	6	6	6	1
NP_000091.1	Cystatin-B [OS=Homo sapiens]	0	46.139	70	4	16	4	98	11.1	7.56	38.38	4	Pf00031	1476	CSTB	21	ENSG00000160213.6			Neutrophil degranulation	3	0	1.41	0.319162	54.98	128.9	72.8	34.4	53.46	1.95387e+07	3.46066e+07	3.59488e+07	2.90318e+07	8449002	1.91489e+07	4	4	4	4	3	3	1	Acetyl [N-Term]
NP_006139.1	LIM and SH3 domain protein 1 isoform a [OS=Homo sapiens]	0	180.748	70	18	167	17	261	29.7	7.05	337.68	18	Pf00018, Pf00412, Pf00880, Pf07653, Pf14604	3927	LASP1	17	ENSG00000002834.17				0	1	1.117	0.945432	37.65	104	96.2	8.67	5.04	5.37966e+08	5.54627e+08	5.85838e+08	5.40186e+08	5.14748e+08	4.76096e+08	18	18	17	19	19	19	1	Acetyl [N-Term]
AAB23031.1	protein disulphide isomerase, PDI {N-terminal} [OS=Homo sapiens]	0	24.398	70	2	27	2	20	2.3	4.44	46.42	2									0	0	1.018	0.924748	7.4	105.1	98.5	5.86	4.49	3.67703e+07	3.24555e+07	3.16762e+07	3.32633e+07	3.1086e+07	2.95862e+07	2	2	2	2	2	2	1
CAA33803.1	unnamed protein product [OS=Homo sapiens]	0	911.603	70	69	844	41	892	102.9	5.38	2355.61	69	Pf00036, Pf00307, Pf00435, Pf08726, Pf11971, Pf13405, Pf13499	87	ACTN1	14		Arrhythmogenic Right Ventricular Cardiomyopathy; Focal Adhesion; Regulation of Actin Cytoskeleton			3	1	0.889	0.590745	32.99	98.8	111.6	6.37	8.65	9.61706e+08	9.13061e+08	1.03627e+09	9.42908e+08	1.08706e+09	1.05869e+09	39	37	38	38	39	39	1
EAW70525.1	5-aminoimidazole-4-carboxamide ribonucleotide formyltransferase/IMP cyclohydrolase, isoform CRA_c [OS=Homo sapiens]	0	332.786	70	32	263	32	592	64.6	6.71	843.77	32	Pf01808, Pf02142	471	ATIC	2		One Carbon Metabolism			1	0	0.972	0.833767	33.52	99.8	100	5.97	2.36	3.33346e+08	2.60406e+08	2.89508e+08	2.90031e+08	2.71365e+08	2.73765e+08	29	32	31	32	32	31	1	Met-loss [N-Term]
NP_003286.1	translationally-controlled tumor protein isoform 2 [OS=Homo sapiens]	0	120.017	69	11	136	11	172	19.6	4.93	558.9	11	Pf00838	7178	TPT1	13	ENSG00000133112.16				0	0	0.862	0.48726	39.28	87.9	114.1	13.75	19.86	3.10818e+08	2.09338e+08	2.44168e+08	4.21673e+08	3.01359e+08	2.92042e+08	10	11	11	10	11	11	1
NP_004628.4	ras-related protein Rab-7a [OS=Homo sapiens]	0	76.667	69	13	111	13	207	23.5	6.7	255.24	13	Pf00025, Pf00071, Pf01926, Pf04670, Pf07728, Pf08477	7879	RAB7A	3	ENSG00000075785.12		Salmonella infection; Amoebiasis; Phagosome; Endocytosis; Tuberculosis	TBC/RABGAPs; Neutrophil degranulation; MHC class II antigen presentation; RAB GEFs exchange GTP for GDP on RABs; RAB geranylgeranylation	18	0	0.925	0.717927	26.62	90.8	95.6	4.32	6.91	1.83784e+08	1.47483e+08	1.64886e+08	1.65771e+08	1.83996e+08	1.63729e+08	11	11	11	10	11	10	1
AAH11365.1	glyoxalase I [OS=Homo sapiens]	0	50.53	69	8	32	1	184	20.8	5.31	47.63	8	Pf00903, Pf12681, Pf13669	2739	GLO1	6					0	7	0.978	0.844928	20.24	101	98.6	1.9	2.91	6.2192e+07	5.23667e+07	5.74469e+07	5.27841e+07	5.48343e+07	5.29086e+07	7	7	7	6	6	7	1	Met-loss+Acetyl [N-Term]
NP_006699.2	lactoylglutathione lyase [OS=Homo sapiens]	0	66.91	69	8	34	1	184	20.8	5.31	56.31	8	Pf00903, Pf12681, Pf13669	2739	GLO1	6	ENSG00000124767.6		Pyruvate metabolism	Pyruvate metabolism	5	0	1.017	0.91118	27.61	80.6	90.2	30.2	16.47	152043	218230	146232	190690	155600	133847	1	1	1	1	1	1	1	Met-loss+Acetyl [N-Term]
AAH01550.1	SFN protein [OS=Homo sapiens]	0	125.012	69	14	111	11	216	24.3	4.82	155.11	14	Pf00244	2810	SFN	1		Myometrial Relaxation and Contraction Pathways; Calcium Regulation in the Cardiac Cell			2	0	0.926	0.720306	64.56	98.3	101.7	34.35	42.99	3.14086e+08	1.57204e+08	1.7141e+08	3.39123e+08	1.68596e+08	1.64161e+08	11	10	11	11	10	10	1
NP_006800.2	Mitochondrial import receptor subunit TOM34 [OS=Homo sapiens]	0	91.662	69	15	54	15	309	34.5	8.98	116.48	15	Pf00515, Pf07719, Pf12895, Pf13414	10953	TOMM34	20	ENSG00000025772.7				0	0	0.96	0.801912	52.7	103	93.2	16.86	14.95	7.39363e+07	4.73096e+07	5.51151e+07	6.17204e+07	4.68976e+07	4.70293e+07	13	13	14	11	12	13	1
NP_002464.1	Myosin-9 [OS=Homo sapiens]	0	1902.12	69	149	1433	129	1960	226.4	5.6	4002.02	149	Pf00063, Pf01442, Pf01496, Pf01576, Pf01765, Pf02736, Pf03962, Pf04111, Pf04156, Pf05911, Pf06637, Pf07888, Pf09731, Pf11068, Pf11559, Pf12128, Pf13094	4627	MYH9	22	ENSG00000100345.20	Primary Focal Segmental Glomerulosclerosis FSGS; VEGFA-VEGFR2 Signaling Pathway	Salmonella infection; Tight junction; Regulation of actin cytoskeleton	RHO GTPases activate PAKs; EPHA-mediated growth cone collapse; RHO GTPases Activate ROCKs; Sema4D induced cell migration and growth-cone collapse; Regulation of actin dynamics for phagocytic cup formation; RHO GTPases activate CIT; RHO GTPases activate PKNs	23	22	0.965	0.815128	31.22	102.8	98.4	6.76	5.02	2.17084e+09	2.16305e+09	2.2732e+09	1.99856e+09	2.16573e+09	2.05262e+09	142	138	143	135	141	140	1	Met-loss+Acetyl [N-Term]
AAX07827.1	Cell proliferation-inducing protein 40 [OS=Homo sapiens]	0	158.261	69	27	160	27	501	57.1	6.6	270.04	27	Pf00152, Pf01336	1615	DARS	2		Alanine and aspartate metabolism			1	0	1.019	0.926585	24.73	106	105	9.07	4.14	2.09654e+08	1.54423e+08	1.74626e+08	1.61375e+08	1.71775e+08	1.63141e+08	22	20	22	20	23	23	1
CAH59743.1	peroxiredoxin 6, partial [OS=Homo sapiens]	0	37.358	69	4	15	2	86	9.7	5.8	43.01	4	Pf00578, Pf08534	9588	PRDX6	1					0	2	0.974	0.835846	33.19	95.4	113.4	17.08	6.97	3.6902e+07	2.54654e+07	2.54351e+07	3.19103e+07	31506355	2.75507e+07	3	2	3	4	3	3	1
AAF86466.1	Thioredoxin 1 [OS=Homo sapiens]	0	74.387	69	6	301	1	105	11.7	4.78	995.84	6	Pf00085, Pf13098, Pf13899, Pf13905, Pf14595	7295	TXN	9		Selenium Micronutrient Network; TNF alpha Signaling Pathway; VEGFA-VEGFR2 Signaling Pathway			3	0	6.889	9.65121e-08	38.92	156.1	19.3	34.9	39.39	692040	1.1657e+06	1.36033e+06	92470.4	148612	206553	1	1	1	1	1	1	1
BAD96324.1	ribosomal protein L5 variant, partial [OS=Homo sapiens]	0	217.075	68	18	209	18	297	34.3	9.66	477.68	18	Pf00861, Pf14204	6125	RPL5	1		Cytoplasmic Ribosomal Proteins			1	0	0.997	0.890905	29.08	103.1	98.5	3.24	2.48	4.05279e+08	3.4807e+08	3.61365e+08	3.50353e+08	3.31867e+08	3.45809e+08	17	16	17	16	18	17	1
EAW90382.1	profilin 1, isoform CRA_b [OS=Homo sapiens]	0	158.638	68	12	465	5	104	11.4	9.17	1116.43	12	Pf00235	5216	PFN1	17	ENSG00000108518.7	Association Between Physico-Chemical Features and Toxicity Associated Pathways; VEGFA-VEGFR2 Signaling Pathway; Regulation of Actin Cytoskeleton; G13 Signaling Pathway			4	9	1.005	0.9032	26.38	102.9	102.9	1.42	1.89	1.07539e+09	9.44428e+08	9.99732e+08	9.83566e+08	9.98695e+08	9.6344e+08	13	15	15	14	14	13	1
NP_001231867.1	thioredoxin isoform 2 [OS=Homo sapiens]	0	57.384	68	7	178	2	85	9.4	6.04	449.98	7	Pf00085, Pf13098, Pf13899, Pf13905	7295	TXN	9	ENSG00000136810.12	Selenium Micronutrient Network; TNF alpha Signaling Pathway; NRF2 pathway; VEGFA-VEGFR2 Signaling Pathway			4	5	0.956	0.80166	31.56	101	100.5	7.42	8.42	3.39181e+08	2.56409e+08	3.11792e+08	2.59778e+08	2.96609e+08	2.92625e+08	6	6	6	6	6	6	1
EAX00978.1	tyrosine 3-monooxygenase/tryptophan 5-monooxygenase activation protein, theta polypeptide, isoform CRA_b [OS=Homo sapiens]	0	123.245	68	15	124	2	141	16.3	7.8	231.22	15	Pf00244	10971	YWHAQ	2		Cell Cycle; Pathogenic Escherichia coli infection; IL-3 Signaling Pathway; Myometrial Relaxation and Contraction Pathways; Calcium Regulation in the Cardiac Cell; Sudden Infant Death Syndrome (SIDS) Susceptibility Pathways			6	0	1.356	0.430893	23.55	124.3	92.3	9.69	25.28	64598164	48877568	5.12595e+07	5.03256e+07	3.74889e+07	2.95927e+07	2	2	2	2	2	2	1	Acetyl [N-Term]
NP_002957.1	Protein S100-A10 [OS=Homo sapiens]	0	137.203	68	10	102	10	97	11.2	7.37	312.6	10	Pf01023	6281	S100A10	1	ENSG00000197747.8	Prostaglandin Synthesis and Regulation		Dissolution of Fibrin Clot	3	0	1.151	0.890905	37.17	110.9	95.2	7.58	10.34	2.98577e+08	2.78045e+08	3.29505e+08	2.2536e+08	2.71836e+08	2.44702e+08	11	11	11	10	10	10	1	Met-loss [N-Term]
EAW48008.1	ribosomal protein S12, isoform CRA_a [OS=Homo sapiens]	0	70.854	68	4	65	3	97	10.5	6.28	203.14	4	Pf01248	6206	RPS12	6		Cytoplasmic Ribosomal Proteins			1	0	1.151	0.890905	37.89	100	90.4	6.59	12.82	9.90513e+07	7.602e+07	9.09825e+07	9.51498e+07	7.31981e+07	7.75602e+07	3	3	3	3	3	3	1	Met-loss+Acetyl [N-Term]
EAX03696.1	ribosomal protein S18, isoform CRA_c [OS=Homo sapiens]	0	114.934	68	13	129	5	128	15	10.27	277.44	13	Pf00416	6222	RPS18	6		Cytoplasmic Ribosomal Proteins			1	8	1.238	0.728211	32.17	109.2	88	3.29	4.43	4.81187e+08	3.9534e+08	4.34054e+08	3.55609e+08	3.19026e+08	3.29787e+08	13	13	13	13	12	13	1	Met-loss+Acetyl [N-Term]
NP_006421.2	T-complex protein 1 subunit delta isoform a [OS=Homo sapiens]	0	286.253	68	28	236	27	539	57.9	7.83	633.5	28	Pf00118	10575	CCT4	2	ENSG00000115484.14			BBSome-mediated cargo-targeting to cilium; Prefoldin mediated transfer of substrate to CCT/TriC; Cooperation of PDCL (PhLP1) and TRiC/CCT in G-protein beta folding; Association of TriC/CCT with target proteins during biosynthesis; Formation of tubulin folding intermediates by CCT/TriC; Folding of actin by CCT/TriC	13	1	1.133	0.916836	30.25	93.5	101.4	3.74	9.86	3.4626e+08	2.84675e+08	3.07267e+08	3.63353e+08	3.1896e+08	2.90677e+08	25	24	24	27	26	27	1
NP_006752.1	14-3-3 protein epsilon [OS=Homo sapiens]	0	229.731	68	20	259	17	255	29.2	4.74	543.55	20	Pf00244	7531	YWHAE	17; CHR_HSCHR17_2_CTG2	ENSG00000108953.16; ENSG00000274474.3	Cell Cycle; Myometrial Relaxation and Contraction Pathways; VEGFA-VEGFR2 Signaling Pathway; Calcium Regulation in the Cardiac Cell; Sudden Infant Death Syndrome (SIDS) Susceptibility Pathways	Cell cycle; Neurotrophin signaling pathway; PI3K-Akt signaling pathway; Hippo signaling pathway; Viral carcinogenesis; Oocyte meiosis; Epstein-Barr virus infection	Regulation of PLK1 Activity at G2/M Transition; Recruitment of NuMA to mitotic centrosomes; Loss of Nlp from mitotic centrosomes; NADE modulates death signalling; Translocation of GLUT4 to the plasma membrane; Deregulated CDK5 triggers multiple neurodegenerative pathways in Alzheimer's disease models; Chk1/Chk2(Cds1) mediated inactivation of Cyclin B:Cdk1 complex; Signaling by Hippo; AURKA Activa…	65	0	0.906	0.654293	24.28	97	106.8	2.18	5.19	4.95342e+08	4.18965e+08	4.7523e+08	5.21183e+08	4.92058e+08	4.57305e+08	17	17	17	17	17	17	1	Acetyl [N-Term]
AAH24292.1	Keratin 5 [OS=Homo sapiens]	0	583.146	68	60	751	48	590	62.3	7.74	1639.95	60	Pf00038, Pf01576, Pf02994, Pf03961, Pf04111, Pf05957, Pf12128	3852	KRT5	12					0	5	1.024	0.93912	35.59	94.6	105.2	12.4	15.28	3.41817e+09	3.78288e+09	3.98627e+09	3.34796e+09	4.42052e+09	4.18121e+09	48	49	48	49	50	47	1
NP_001302.1	Cysteine-rich protein 1 [OS=Homo sapiens]	0	58.925	68	4	50	4	77	8.5	8.75	103.71	4	Pf00412	1396	CRIP1	14	ENSG00000257341.5; ENSG00000213145.9				0	0	1.057	0.982947	33.45	102.7	100.9	18.6	20.61	7.16292e+07	9.02106e+07	92701440	6.18e+07	8.65742e+07	9.00307e+07	4	4	4	4	4	4	1
NP_783316.2	metallothionein-1E [OS=Homo sapiens]	0	41.397	67	4	32	2	61	6	7.96	64.54	4		4493	MT1E	16	ENSG00000169715.14	Copper homeostasis; Zinc homeostasis	Mineral absorption	Metallothioneins bind metals	6	0	2.629	0.00343458	46.38	182.9	0.3	6.73	25.84	3.64507e+06	3.21665e+06	3.90034e+06	6103.65	4393.88	7412.73	2	2	2	1	1	1	1
AAH66926.1	ribosomal protein S3a [OS=Homo sapiens]	0	242.374	67	25	239	25	264	30	9.73	481.67	25	Pf01015	6189	RPS3A	4		Cytoplasmic Ribosomal Proteins			1	0	1.04	0.966344	23.55	105	90.9	1.48	9.67	9.55787e+08	8.37168e+08	9.32399e+08	8.90564e+08	7.34754e+08	7.43494e+08	24	23	23	25	24	24	1
NP_006588.1	heat shock cognate 71 kDa protein isoform 1 [OS=Homo sapiens]	0	677.97	67	47	801	41	646	70.9	5.52	2084.1	47	Pf00012, Pf02463, Pf06723	3312	HSPA8	11	ENSG00000109971.13	Parkin-Ubiquitin Proteasomal System pathway; MAPK Signaling Pathway; Exercise-induced Circadian Regulation	Measles; MAPK signaling pathway; Longevity regulating pathway - multiple species; Estrogen signaling pathway; Toxoplasmosis; Spliceosome; Endocytosis; Antigen processing and presentation; Influenza A; Protein processing in endoplasmic reticulum; Epstein-Barr virus infection; Legionellosis	Protein methylation; Clathrin-mediated endocytosis; Regulation of HSF1-mediated heat shock response; Golgi Associated Vesicle Biogenesis; GABA synthesis, release, reuptake and degradation; Lysosome Vesicle Biogenesis; CHL1 interactions; AUF1 (hnRNP D0) binds and destabilizes mRNA; Attenuation phase; Neutrophil degranulation; mRNA Splicing - Major Pathway; Interleukin-4 and 13 signaling; HSP90 cha…	52	6	0.98	0.849243	31.71	103.4	97.3	4.43	2.68	3.86223e+09	3.27598e+09	3.35981e+09	3.39846e+09	3.17694e+09	3.16088e+09	47	50	49	50	49	51	1	Met-loss+Acetyl [N-Term]
NP_112487.1	SRA stem-loop-interacting RNA-binding protein, mitochondrial isoform 1 precursor [OS=Homo sapiens]	0	42.102	67	6	39	6	109	12.3	10.24	59.33	6	Pf00076, Pf13893, Pf14259	81892	SLIRP	14	ENSG00000119705.9				0	0	1.251	0.696747	15.84	102.9	87.1	7.87	6.76	7.55913e+07	6.17591e+07	7.85076e+07	5.33139e+07	5.76931e+07	5.9184e+07	5	5	6	5	5	6	1
CAG46507.1	PHB, partial [OS=Homo sapiens]	0	156.096	67	17	111	17	272	29.8	5.76	264.49	17	Pf01145	5245	PHB	17					0	0	1.08	0.988452	35.21	93.3	96.6	7.68	4.55	2.98815e+08	2.26056e+08	2.53332e+08	2.61099e+08	2.34012e+08	2.47454e+08	16	14	13	16	16	14	1
AAH18140.1	RPS21 protein [OS=Homo sapiens]	0	90.772	67	6	88	6	81	8.8	8.5	281.3	6	Pf01249	6227	RPS21	20	ENSG00000171858.17	Cytoplasmic Ribosomal Proteins			1	0	1.125	0.932387	15	97.1	93.9	13.25	9.86	1.25177e+08	1.02868e+08	1.43328e+08	1.26879e+08	1.02811e+08	1.08408e+08	4	4	4	5	4	4	1	Acetyl [N-Term]
NP_004550.2	Nuclease-sensitive element-binding protein 1 [OS=Homo sapiens]	0	302.256	67	13	186	11	324	35.9	9.88	441.45	13	Pf00313	4904	YBX1	1	ENSG00000065978.18	Brain-Derived Neurotrophic Factor (BDNF) signaling pathway; Mecp2 and Associated Rett Syndrome; mRNA Processing; Sudden Infant Death Syndrome (SIDS) Susceptibility Pathways		mRNA Splicing - Major Pathway; mRNA Splicing - Minor Pathway	9	2	1.181	0.834567	34.08	132	80.8	16.19	20.66	5.60895e+08	3.53586e+08	4.54537e+08	3.53896e+08	2.64378e+08	2.32659e+08	13	13	13	11	12	12	1	Met-loss+Acetyl [N-Term]
EAW62453.1	ribosomal protein S17, isoform CRA_a [OS=Homo sapiens]	0	89.511	67	4	42	1	78	8.9	5.49	201.18	4	Pf00833	6218	RPS17	15		Cytoplasmic Ribosomal Proteins			1	0	3.176	0.0183821	8.47	103.4	32.6	8.07		358264	279000				95409.9	1	1				1	1
AAB59392.1	hypoxanthine phosphoribosyltransferase, partial [OS=Homo sapiens]	0	112.758	67	14	90	14	218	24.6	6.68	184.09	14	Pf00156, Pf15610	3251	HPRT1	X		Nucleotide Metabolism			1	0	1.114	0.951005	30.51	109.2	94.8	3	5.36	1.23333e+08	1.10136e+08	124240985	9.94998e+07	107496902	9.81028e+07	12	12	12	11	11	12	1
NP_066952.1	Inorganic pyrophosphatase [OS=Homo sapiens]	0	175.698	66	13	98	13	289	32.6	5.86	280.25	13	Pf00719	5464	PPA1	10	ENSG00000180817.11		Oxidative phosphorylation	Cytosolic tRNA aminoacylation; Pyrophosphate hydrolysis	7	0	0.945	0.776317	33.47	99.3	103.5	17	8.09	1.52194e+08	9.58669e+07	1.16141e+08	1.21356e+08	1.1498e+08	1.00923e+08	13	11	13	13	13	13	1
BAD97114.1	prefoldin 1 variant, partial [OS=Homo sapiens]	0	30.244	66	7	32	7	122	14.2	6.81	42.04	7	Pf01920	5201	PFDN1	5					0	0	1.082	0.988004	25.02	89.2	99.9	17.74	2.28	2.85516e+07	2.62549e+07	3.72671e+07	3.0994e+07	3.03897e+07	3.13655e+07	5	6	6	7	7	7	1	Met-loss+Acetyl [N-Term]
NP_055227.1	calcyclin-binding protein isoform 1 [OS=Homo sapiens]	0	147.495	66	14	115	14	228	26.2	8.25	332.57	14	Pf04969, Pf05002, Pf09032	27101	CACYBP	1	ENSG00000116161.17	Gastric cancer network 2	Wnt signaling pathway		2	0	1.164	0.870124	22.93	113.8	89.5	4.24	1.59	1.61855e+08	148340430	1.67285e+08	1.2302e+08	1.21484e+08	1.16952e+08	11	12	13	13	13	13	1	Met-loss+Acetyl [N-Term]
BAF84244.1	unnamed protein product [OS=Homo sapiens]	0	427.357	66	38	320	38	543	62.6	6.8	744.63	38	Pf00515, Pf12895, Pf13414, Pf13424, Pf13432	10963	STIP1	11					0	0	1.117	0.946063	29.42	107.3	93.8	1.15	0.45	6.75785e+08	5.79728e+08	6.27918e+08	5.34344e+08	5.20357e+08	5.21041e+08	32	35	35	36	35	35	1	Acetyl [N-Term]
NP_665807.1	Myotrophin [OS=Homo sapiens]	0	49.673	66	5	42	5	118	12.9	5.52	108.93	5	Pf00023, Pf12796, Pf13606, Pf13637, Pf13857	767558; 136319	LUZP6; MTPN	7	ENSG00000105887.10				0	0	1.056	0.981141	18.39	104.5	95.8	4.16	5.46	3.43877e+07	2.87416e+07	3.39717e+07	2.90243e+07	3.07823e+07	2.75604e+07	4	4	4	4	4	4	1	Met-loss+Acetyl [N-Term]
NP_001748.1	carbonyl reductase [NADPH] 1 isoform 1 [OS=Homo sapiens]	0	100.635	66	14	53	11	277	30.4	8.32	119.37	14	Pf00106, Pf01370, Pf08659, Pf13561	873; 54093	CBR1; SETD4	21	ENSG00000159228.12	NRF2 pathway	Arachidonic acid metabolism; Metabolic pathways; Chemical carcinogenesis; Metabolism of xenobiotics by cytochrome P450	Synthesis of Prostaglandins (PG) and Thromboxanes (TX)	10	3	0.944	0.771663	23.84	100.6	104.7	7.31	3.59	9.39189e+07	7.69049e+07	7.70191e+07	8.96366e+07	8.2473e+07	8.21409e+07	13	13	12	13	13	13	1	Met-loss+Acetyl [N-Term]
AAA59586.1	MT1A, partial [OS=Homo sapiens]	0	15.452	66	3	12	2	61	6.1	7.96	15.2	3		4489	MT1A	16		Zinc homeostasis			1	0	2.742	0.0231895	0.06	149.3	54.5	6.05		1.40343e+06	1225705	1197784			458316	1	1	1			1	1	Acetyl [N-Term]
BAG60202.1	unnamed protein product [OS=Homo sapiens]	0	468.967	66	20	1019	8	395	42.6	9.01	3362.24	20	Pf00009, Pf03143, Pf03144	1915	EEF1A1	6		Translation Factors			1	14	0.878	0.54621	26.71	88.1	108.4	7.12	5.61	3.78486e+09	2.89091e+09	3.24044e+09	3.90068e+09	3.4483e+09	3.75944e+09	18	21	21	21	23	22	1
AAA35748.1	Cytokeratin 8 [OS=Homo sapiens]	0	740.976	65	56	1283	2	483	53.7	5.36	3088.54	56	Pf00038, Pf01576, Pf13166, Pf15003	3856	KRT8	12					0	0	0.63	0.0115788	19.64	77.8	123.6	22.37	15.94	8.24507e+06	11376724	10902925	13653328	18480934	1.63354e+07	1	1	1	1	1	1	1
AAA36025.1	90 kDa heat shock protein [OS=Homo sapiens]	0	929.557	65	64	1436	40	724	83.2	5.03	3115.88	64	Pf00183, Pf02518, Pf13589	3326	HSP90AB1	6					0	26	0.974	0.835006	28.76	106.7	99.1	4.99	3.14	4.38485e+09	3.72663e+09	3.77631e+09	3.80718e+09	3.51e+09	3.55238e+09	64	62	61	65	63	65	1
BAD97275.1	serine hydroxymethyltransferase 2 (mitochondrial) variant, partial [OS=Homo sapiens]	0	268.773	65	28	215	27	504	55.9	8.4	480.53	28	Pf00464	6472	SHMT2	12		Vitamin B12 Metabolism; Folate Metabolism; One Carbon Metabolism; Trans-sulfuration and one carbon metabolism			4	1	1.103	0.967226	32.14	92	91.4	3.4	6.28	3.94372e+08	3.33634e+08	3.49784e+08	3.19707e+08	3.54424e+08	3.39992e+08	26	26	24	25	26	27	1
EAW52998.1	lamin A/C, isoform CRA_c [OS=Homo sapiens]	0	628.621	65	60	600	5	790	87.3	8.72	1357.57	60	Pf00038, Pf00932, Pf02463, Pf05911, Pf12128	4000	LMNA	1		Arrhythmogenic Right Ventricular Cardiomyopathy; Adipogenesis; Fas Ligand (FasL) pathway and Stress induction of Heat Shock Proteins (HSP) regulation			3	56	0.893	0.606443	29.98	98.9	103.4	3.79	12.4	2.21871e+09	1.83287e+09	1.96071e+09	2.41563e+09	1.98047e+09	1.86612e+09	58	59	60	57	60	57	1
P49411.2	RecName: Full=Elongation factor Tu, mitochondrial; Short=EF-Tu; AltName: Full=P43; Flags: Precursor [OS=Homo sapiens]	0	308.389	65	25	197	25	452	49.5	7.61	556.17	25	Pf00009, Pf03143, Pf03144	7284	TUFM	16				Mitochondrial translation elongation	4	0	1.228	0.752318	33.53	111.7	80.8	5.83	8.01	4.18096e+08	3.34432e+08	3.56133e+08	2.91581e+08	2.49755e+08	2.47406e+08	22	23	22	20	20	22	1
AAD26137.1	nuclear chloride channel [OS=Homo sapiens]	0	175.142	65	15	177	15	241	26.9	5.1	551.18	15	Pf00043, Pf13409, Pf13410, Pf13417	1192	CLIC1	6					0	0	0.922	0.709551	52.38	109.3	91.1	1.46	9.77	3.44016e+08	3.07284e+08	3.35679e+08	3.14613e+08	2.64679e+08	2.56828e+08	13	14	14	15	14	14	1	Met-loss+Acetyl [N-Term]
BAF83456.1	unnamed protein product [OS=Homo sapiens]	0	417.362	64	33	331	33	535	57.4	6.46	905.44	33	Pf00118	10576	CCT2	12					0	0	1.013	0.914884	22.02	101.7	95.7	1.66	2.83	6.17097e+08	5.21621e+08	5.73005e+08	5.22975e+08	4.96629e+08	5.21708e+08	33	32	32	31	30	32	1	Met-loss+Acetyl [N-Term]
BAG59786.1	unnamed protein product [OS=Homo sapiens]	0	105.88	64	13	92	2	154	18.1	10.48	191.39	13	Pf01775	6142	RPL18A	19		Cytoplasmic Ribosomal Proteins			1	11	0.725	0.097646	43.72	88.6	113.3	6.34	4.21	1.08695e+08	8.65763e+07	1.06593e+08	1.28051e+08	1.27126e+08	1.16566e+08	13	13	13	13	13	12	1
EAX06870.1	cytidylate kinase, isoform CRA_b [OS=Homo sapiens]	0	42.6	64	7	45	1	137	15.3	7.12	80.37	7	Pf00406, Pf13207, Pf13238, Pf13671	51727	CMPK1	1					0	0	1.138	0.97494	19.34	105.7	92.9	19.94	0.78	2386577	1.38805e+06	2.00455e+06		1.66493e+06	1.67093e+06	1	1	1		1	1	1
AAC03787.1	malate dehydrogenase precursor [OS=Homo sapiens]	0	281.05	64	23	281	23	338	35.5	8.68	801.42	23	Pf00056, Pf01073, Pf01118, Pf02866, Pf13460	4191	MDH2	7		Glycolysis and Gluconeogenesis; TCA Cycle			2	0	1.057	0.981982	28.32	105.3	92.7	7.2	2.19	8.54882e+08	6.79232e+08	7.0586e+08	6.30529e+08	6.18395e+08	5.907e+08	21	21	20	21	21	21	1
NP_003891.1	sequestosome-1 isoform 1 [OS=Homo sapiens]	0	272.755	64	21	144	21	440	47.7	5.22	455.73	21	Pf00564, Pf00569	8878	SQSTM1	5	ENSG00000161011.19	Regulation of toll-like receptor signaling pathway; IL-1 signaling pathway; RANKL/RANK (Receptor activator of NFKB (ligand)) Signaling Pathway; Brain-Derived Neurotrophic Factor (BDNF) signaling pathway; Apoptosis-related network due to altered Notch3 in ovarian cancer; NRF2 pathway; Interleukin-1 Induced Activation of NF-kappa-B; Senescence and Autophagy in Cancer	Osteoclast differentiation	Interleukin-1 family signaling; NF-kB is activated and signals survival; Signalling by NGF; p75NTR recruits signalling complexes; NRIF signals cell death from the nucleus; Pink/Parkin Mediated Mitophagy	24	0	0.522	0.000185407	48.91	56.6	94.6	28.41	22.73	1.28949e+08	7.06461e+07	7.73081e+07	1.57561e+08	9.77439e+07	1.2185e+08	18	12	11	18	16	17	1
EAW52996.1	lamin A/C, isoform CRA_a [OS=Homo sapiens]	0	602.513	64	57	580	2	698	78.3	8.9	1260.31	57	Pf00038, Pf00932, Pf05911, Pf12128	4000	LMNA	1		Arrhythmogenic Right Ventricular Cardiomyopathy; Adipogenesis; Fas Ligand (FasL) pathway and Stress induction of Heat Shock Proteins (HSP) regulation			3	0	0.841	0.408638	13.22	91.4	108.7	5.83	8.18	3.12346e+07	2.92066e+07	33326336	4.04843e+07	3.37863e+07	3.56557e+07	2	2	2	2	2	2	1
BAF84660.1	unnamed protein product [OS=Homo sapiens]	0	355.533	64	29	360	15	406	46.1	5.48	1017.41	29	Pf00270, Pf00271, Pf04851	1973	EIF4A1	17		Translation Factors; Interferon type I signaling pathways			2	14	1.05	0.971087	20.93	103.8	97.6	4.14	6.14	1.03195e+09	8.37892e+08	9.14343e+08	8.87035e+08	7.68879e+08	8.10568e+08	28	29	28	29	29	28	1
AAF23374.1	MLL septin-like fusion protein MSF-A [OS=Homo sapiens]	0	212.345	64	28	139	28	586	65.3	8.97	329.91	28	Pf00735, Pf01926, Pf03193, Pf04548	10801	SEPT9	17					0	0	1.255	0.684895	29.89	112.3	84.1	9.23	5.44	1.60438e+08	1.67712e+08	1.62442e+08	1.09687e+08	1.15674e+08	1.1882e+08	21	21	21	22	22	23	1
BAG59745.1	unnamed protein product [OS=Homo sapiens]	0	195.633	64	14	135	14	238	26.6	5.29	367.84	14	Pf00307, Pf03271	22919	MAPRE1	20					0	0	1.021	0.933216	27.62	113.1	86	1.61	6.28	2.57568e+08	2.18782e+08	2.37743e+08	1.75337e+08	1.61008e+08	1.81261e+08	13	13	13	14	14	14	1
EAW62679.1	heterogeneous nuclear ribonucleoprotein K, isoform CRA_e [OS=Homo sapiens]	0	385.465	64	30	347	30	464	51.2	5.39	999.28	30	Pf00013, Pf08067, Pf13014, Pf13083	3190	HNRNPK	9		mRNA Processing			1	0	1.015	0.917292	43.93	102	100.7	2.9	4.8	8.36842e+08	7.52631e+08	8.41936e+08	7.83273e+08	7.9567e+08	7.17759e+08	28	29	27	29	30	30	1	Acetyl [N-Term]
AAM18189.1	endoplasmic reticulum-associated amyloid beta peptide-binding protein, partial [OS=Homo sapiens]	0	114.39	64	10	74	2	196	20.6	7.87	211.94	10	Pf00106, Pf08659, Pf13561	3028	HSD17B10	X		Tryptophan metabolism			1	0	0.947	0.780632	2.74	91.9	97	2.52	3.69	16476802	14973176	15553293	16010656	16634900	15439494	1	1	1	1	1	1	1
AAH69613.1	p21 protein (Cdc42/Rac)-activated kinase 2 [OS=Homo sapiens]	0	165.819	64	20	116	20	524	58.1	6.09	266.12	20	Pf00069, Pf00786, Pf07714, Pf14531	5062	PAK2	3		Integrin-mediated Cell Adhesion; Apoptosis-related network due to altered Notch3 in ovarian cancer; Focal Adhesion; Fas Ligand (FasL) pathway and Stress induction of Heat Shock Proteins (HSP) regulation; TGF-beta Signaling Pathway; MAPK Signaling Pathway; VEGFA-VEGFR2 Signaling Pathway; Regulation of Actin Cytoskeleton			8	0	1.164	0.870299	34.61	104.4	95.4	8.16	7.26	83079078	7.95326e+07	9.29099e+07	7.06324e+07	8.00738e+07	7.4558e+07	15	16	16	17	17	17	1	Met-loss+Acetyl [N-Term]
AAF00150.1	RAB14 protein [OS=Homo sapiens]	0	108.03	64	12	71	11	215	23.9	6.21	181.55	12	Pf00009, Pf00025, Pf00071, Pf04670, Pf08477	51552	RAB14	9					0	1	0.889	0.592066	21.75	94.3	107.2	10.39	7.03	1.26961e+08	9.4728e+07	9.97078e+07	1.26102e+08	1.11275e+08	1.07651e+08	12	12	10	12	12	12	1
AAH59950.1	Rpl12 protein [OS=Homo sapiens]	0	111.057	64	8	103	1	132	14.2	8.65	363.34	8	Pf00298, Pf03946	6136	RPL12	9	ENSG00000197958.12	Cytoplasmic Ribosomal Proteins			1	0	0.803	0.278988	14.86	89.4	111.3	4.37	13.17	28490362	22850640	26489437	26995104	3.13553e+07	3.42459e+07	1	1	1	1	1	1	1
EAX03782.1	ribosomal protein S10, isoform CRA_a [OS=Homo sapiens]	0	84.639	64	11	103	2	170	19.9	10.11	210.03	11	Pf03501	6204	RPS10	6		Cytoplasmic Ribosomal Proteins			1	9	1.124	0.934192	31.34	100.4	103.2	15.91	5.7	9.43875e+07	6.19061e+07	7.0474e+07	7.01919e+07	6.32496e+07	7.01353e+07	11	9	10	10	10	10	1
AAH53371.1	Ribosomal protein S27a [OS=Homo sapiens]	0	123.386	63	12	170	12	156	17.9	9.6	391.8	12	Pf00240, Pf01599, Pf11976, Pf13019, Pf13881, Pf14560	6233	RPS27A	2		Cytoplasmic Ribosomal Proteins			1	0	0.873	0.529747	48.92	89.7	89.5	16.63	15.54	2.4658e+08	1.55598e+08	1.91443e+08	2.38353e+08	1.79337e+08	1.79971e+08	10	9	10	10	9	10	1
AAH62302.1	Phosphoglycerate mutase 1 (brain) [OS=Homo sapiens]	0	215.944	63	16	169	16	254	28.8	7.18	458.42	16	Pf00300	5223	PGAM1	10		Glycolysis and Gluconeogenesis			1	0	1.049	0.970674	33.56	98.6	105.2	2.11	3.19	3.1059e+08	2.7298e+08	2.85369e+08	3.17924e+08	2.9269e+08	2.96861e+08	15	15	15	15	15	15	1
AAC51518.1	ER-60 protein [OS=Homo sapiens]	0	336.426	63	32	261	32	505	56.7	6.21	691.12	32	Pf00085, Pf13098, Pf13848, Pf13899, Pf13905	2923	PDIA3	15					0	0	0.975	0.838221	37.82	101.2	94.3	5.47	2.43	4.71153e+08	3.6958e+08	4.34461e+08	3.92615e+08	3.70836e+08	3.85524e+08	31	31	31	29	29	31	1
NP_001291217.1	40S ribosomal protein SA isoform 2 [OS=Homo sapiens]	0	263.162	63	17	234	17	300	33.3	4.87	725.72	17	Pf00318	3921	RPSA	3	ENSG00000168028.13	Cytoplasmic Ribosomal Proteins			1	0	1.005	0.903594	18.71	102.3	96.8	6.91	1.84	6.10663e+08	4.64183e+08	5.4645e+08	5.00949e+08	4.78729e+08	4.92579e+08	17	15	18	17	16	17	1	Met-loss+Acetyl [N-Term]
NP_002564.1	Platelet-activating factor acetylhydrolase IB subunit gamma [OS=Homo sapiens]	0	69.815	63	8	37	8	231	25.7	6.84	100.97	8	Pf00657, Pf13472	5050	PAFAH1B3	19	ENSG00000079462.7		Metabolic pathways; Ether lipid metabolism	COPI-independent Golgi-to-ER retrograde traffic	7	0	1.093	0.972839	36.07	108.9	92.9	4.9	8.01	5.05708e+07	4.84017e+07	4.89516e+07	36954647	4.25274e+07	3.93883e+07	7	7	7	6	6	6	1	Met-loss+Acetyl [N-Term]
EAW68477.1	proteasome (prosome, macropain) subunit, alpha type, 1, isoform CRA_b [OS=Homo sapiens]	0	157.433	63	15	123	15	306	33.9	7.12	276.37	15	Pf00227, Pf10584	5682	PSMA1	11		Proteasome Degradation			1	0	1.116	0.947454	28.05	100.1	98.3	4.04	1.6	2.05251e+08	1.79063e+08	2.08763e+08	1.86813e+08	1.81964e+08	176301661	13	14	15	12	13	13	1
AAA93227.1	Ki nuclear autoantigen, partial [OS=Homo sapiens]	0	12.181	63	3	16	1	54	6.3	9.25	30.87	3	Pf02252	10197	PSME3	17		Proteasome Degradation			1	0	0.01	1.62313e-16			189.5		3.02				7.31877e+06	6767292	6.829e+06				1	1	1	1
NP_004085.1	Eukaryotic translation initiation factor 2 subunit 1 [OS=Homo sapiens]	0	190.93	63	18	165	18	315	36.1	5.08	424.36	18	Pf00575, Pf07541	1965	EIF2S1	14	ENSG00000134001.12	Translation Factors; Brain-Derived Neurotrophic Factor (BDNF) signaling pathway	Influenza A; Apoptosis; Measles; Hepatitis C; Protein processing in endoplasmic reticulum; RNA transport; Non-alcoholic fatty liver disease (NAFLD); Herpes simplex infection	Formation of the ternary complex, and subsequently, the 43S complex; L13a-mediated translational silencing of Ceruloplasmin expression; ABC-family proteins mediated transport; Translation initiation complex formation; PERK regulates gene expression; GTP hydrolysis and joining of the 60S ribosomal subunit; Recycling of eIF2:GDP; Ribosomal scanning and start codon recognition	25	0	0.866	0.498597	24.33	93.8	104.9	8.43	6.03	2.19037e+08	1.6148e+08	1.92315e+08	2.23917e+08	194830756	2.02737e+08	18	18	18	18	18	18	1
NP_000909.2	protein disulfide-isomerase precursor [OS=Homo sapiens]	0	336.719	63	31	287	31	508	57.1	4.87	628.89	31	Pf00085, Pf01216, Pf13098, Pf13848, Pf13899, Pf13905	5034	P4HB	17	ENSG00000185624.14		Protein processing in endoplasmic reticulum	Post-translational protein phosphorylation; Regulation of Insulin-like Growth Factor (IGF) transport and uptake by Insulin-like Growth Factor Binding Proteins (IGFBPs); VLDL assembly; Chylomicron assembly; Collagen biosynthesis and modifying enzymes; Interleukin-12 family signaling; Detoxification of Reactive Oxygen Species; Hedgehog ligand biogenesis	23	0	1.093	0.972875	28.76	95	113.8	5.36	7.86	4.90058e+08	3.96069e+08	4.20366e+08	5.00183e+08	4.94422e+08	4.25178e+08	28	29	29	30	29	30	1
NP_004604.2	Protein-glutamine gamma-glutamyltransferase 2 isoform a [OS=Homo sapiens]	0	587.202	63	39	770	39	687	77.3	5.22	2395.33	39	Pf00868, Pf00927, Pf01841	7052	TGM2	20	ENSG00000198959.11		Huntington's disease		1	0	0.899	0.629036	52.36	96.4	111.2	26.06	29.32	1.42162e+09	2.0214e+09	2.2417e+09	1.40452e+09	2.45606e+09	2.39057e+09	39	38	39	37	37	41	1	Met-loss+Acetyl [N-Term]
P22061.4	RecName: Full=Protein-L-isoaspartate(D-aspartate) O-methyltransferase; Short=PIMT; AltName: Full=L-isoaspartyl protein carboxyl methyltransferase; AltName: Full=Protein L-isoaspartyl/D-aspartyl methyltransferase; AltName: Full=Protein-beta-aspartate methyltransferase [OS=Homo sapiens]	0	110.078	63	8	60	8	227	24.6	7.21	177.13	8	Pf01135, Pf01209, Pf05175, Pf06325, Pf08241, Pf12847, Pf13489, Pf13659, Pf13847	5110	PCMT1	6				Protein repair	2	0	0.948	0.783441	68.86	87.9	99.6	12.66	14.8	6.39417e+07	4.40284e+07	5.07857e+07	6.9489e+07	5.2024e+07	5.42677e+07	8	8	8	8	8	8	1
NP_036611.2	14-3-3 protein gamma [OS=Homo sapiens]	0	152.146	62	16	142	10	247	28.3	4.89	259.44	16	Pf00244	7532	YWHAG	7	ENSG00000170027.6	Cell Cycle; Prolactin Signaling Pathway; Myometrial Relaxation and Contraction Pathways; Calcium Regulation in the Cardiac Cell; Sudden Infant Death Syndrome (SIDS) Susceptibility Pathways	Oocyte meiosis; PI3K-Akt signaling pathway; Epstein-Barr virus infection; Cell cycle; Hippo signaling pathway; Viral carcinogenesis	Chk1/Chk2(Cds1) mediated inactivation of Cyclin B:Cdk1 complex; Regulation of PLK1 Activity at G2/M Transition; AURKA Activation by TPX2; Anchoring of the basal body to the plasma membrane; Recruitment of NuMA to mitotic centrosomes; Activation of BAD and translocation to mitochondria ; Recruitment of mitotic centrosome proteins and complexes; Loss of Nlp from mitotic centrosomes; Translocation o…	48	0	0.987	0.870371	26.93	99.5	94.1	6.61	1.72	2.30336e+08	2.27735e+08	2.43361e+08	2.28801e+08	2.17e+08	2.17078e+08	9	10	10	11	10	11	1	Met-loss+Acetyl [N-Term]
AAB35169.1	17 kDa cyclophilin A {internal fragment} [OS=Homo sapiens]	0	39.992	62	1	73	1	29	3.2	4.28	206.41	1									0	0	0.33	3.58672e-11	81.75	64.7	192.6	37.7	75.66	9.1991e+06	7.37721e+06	3.92063e+06	1.10934e+07	2.26854e+07	5.29374e+07	2	2	2	1	1	1	1	Acetyl [N-Term]
EAX02335.1	ribonuclease/angiogenin inhibitor 1, isoform CRA_c, partial [OS=Homo sapiens]	0	182.475	62	19	98	19	466	50.3	4.92	336.22	19	Pf13855	6050	RNH1	11					0	0	0.958	0.801912	36.15	105	105.7	5.33	0.64	8.3535e+07	6.58948e+07	7.35185e+07	7.17657e+07	7.03412e+07	6.90541e+07	16	17	16	16	15	16	1
AAB00969.1	ribosomal protein, partial [OS=Homo sapiens]	0	256.205	62	14	146	14	192	21.8	10.1	510.75	14	Pf01251	6201	RPS7	2		Cytoplasmic Ribosomal Proteins			1	0	1.057	0.982876	81.67	110.9	91.9	10.47	10.58	2.51247e+08	1.78361e+08	2.11311e+08	1.72196e+08	1.38719e+08	1.65226e+08	15	16	14	12	13	16	1
NP_005564.1	lamin-B1 isoform 1 [OS=Homo sapiens]	0	259.222	62	32	223	28	586	66.4	5.16	480.3	32	Pf00038, Pf00932, Pf01576, Pf07888, Pf09726, Pf09731, Pf10186, Pf12128	4001	LMNB1	5	ENSG00000113368.11	Fas Ligand (FasL) pathway and Stress induction of Heat Shock Proteins (HSP) regulation	Apoptosis	Gene and protein expression by JAK-STAT signaling after Interleukin-12 stimulation; Breakdown of the nuclear lamina; Initiation of Nuclear Envelope Reformation; Clearance of Nuclear Envelope Membranes from Chromatin; Meiotic synapsis; Depolymerisation of the Nuclear Lamina; Formation of Senescence-Associated Heterochromatin Foci (SAHF); Deregulated CDK5 triggers multiple neurodegenerative pathway…	34	3	0.966	0.817412	38.17	99.7	99	8.25	3.77	4.20823e+08	3.85716e+08	4.68396e+08	4.08815e+08	3.73108e+08	3.92908e+08	27	31	27	30	29	31	1
NP_005197.3	Adapter molecule crk isoform b [OS=Homo sapiens]	0	44.389	62	7	35	7	204	22.9	5.48	46.34	7	Pf00017, Pf00018, Pf07653, Pf14604	1398	CRK	17	ENSG00000167193.7	Integrin-mediated Cell Adhesion; B Cell Receptor Signaling Pathway; Kit receptor signaling pathway; Focal Adhesion; Signaling of Hepatocyte Growth Factor Receptor; Rac1/Pak1/p38/MMP-2 pathway; MAPK Signaling Pathway; VEGFA-VEGFR2 Signaling Pathway; Angiopoietin Like Protein 8 Regulatory Pathway; Chemokine signaling pathway; EGF/EGFR Signaling Pathway; Insulin Signaling; Regulation of Actin Cytosk…			16	0	0.959	0.801912	23.78	103	105.1	10.77	13.4	2.28e+07	1.85841e+07	1.74586e+07	1.57522e+07	1.97452e+07	1.94598e+07	6	7	5	5	7	6	1
CAA35621.1	Nm23 protein, partial [OS=Homo sapiens]	0	126.071	62	9	108	1	180	20.4	7.31	200.33	9	Pf00334	4830	NME1	17					0	0	0.103	1.62313e-16	23.56	23.2	261.6	12.77	14.47	1.20799e+07	8.66509e+06	9120219	1.08068e+08	100853414	7.92534e+07	1	1	1	1	1	1	1
EAW94269.1	proteasome (prosome, macropain) 26S subunit, ATPase, 5, isoform CRA_a [OS=Homo sapiens]	0	149.348	62	20	134	1	383	43	8.34	252.92	20	Pf00004, Pf00910, Pf01057, Pf01078, Pf05496, Pf06068, Pf06414, Pf07724, Pf07726, Pf07728, Pf13191, Pf13207, Pf13401	5705	PSMC5	17		Proteasome Degradation; Parkin-Ubiquitin Proteasomal System pathway			2	0	1.702	0.0525825	30.64	139.6	82.1	15.96	25.66	4.66291e+06	5538246	5.80186e+06	2.09032e+06	3418703	3.21562e+06	1	1	1	1	1	1	1
BAF83829.1	unnamed protein product [OS=Homo sapiens]	0	359.113	62	30	274	29	471	54.3	9.2	692.26	30	Pf00076, Pf08075, Pf13893, Pf14259	4841	NONO	X		mRNA Processing			1	1	1.184	0.828033	35.84	106.1	92.7	2.55	8.55	5.15294e+08	4.42181e+08	4.65242e+08	4.07512e+08	3.66606e+08	4.31893e+08	26	27	28	25	25	29	1
XP_011529261.1	PREDICTED: moesin isoform X1 [OS=Homo sapiens]	0	413.097	61	40	351	30	610	71.3	6.06	735.01	40	Pf00373, Pf00769, Pf09379, Pf09380	4478	MSN	X		AGE/RAGE pathway; Regulation of Actin Cytoskeleton			2	12	0.899	0.628863	35.62	93	106.4	3.7	9.68	8.74199e+08	7.08943e+08	7.96562e+08	9.93752e+08	8.05445e+08	8.59228e+08	37	36	35	39	37	35	1
NP_005991.1	tubulin alpha-4A chain isoform 1 [OS=Homo sapiens]	0	410.934	61	29	756	7	448	49.9	5.06	2317.08	29	Pf00091, Pf03953	7277	TUBA4A	2	ENSG00000127824.13	Pathogenic Escherichia coli infection; Parkin-Ubiquitin Proteasomal System pathway	Phagosome; Pathogenic Escherichia coli infection; Apoptosis; Gap junction	COPI-independent Golgi-to-ER retrograde traffic; COPI-dependent Golgi-to-ER retrograde traffic; Carboxyterminal post-translational modifications of tubulin; Regulation of PLK1 Activity at G2/M Transition; Recruitment of NuMA to mitotic centrosomes; Hedgehog 'off' state; Loss of Nlp from mitotic centrosomes; Translocation of GLUT4 to the plasma membrane; Prefoldin mediated transfer of substrate to…	76	0	1.083	0.987276	42.41	75.1	114.7	18.7	5.11	3.22165e+07	2.16769e+07	2.16013e+07	3.58324e+07	3.17943e+07	3.39859e+07	6	6	6	6	6	6	1
AAI26185.1	Keratin 13 [OS=Homo sapiens]	0	217.133	61	24	261	16	458	49.6	4.96	691.54	24	Pf00038	3860	KRT13	17					0	5	0.715	0.0801373	38.33	76.2	129.3	19.95	24.24	1.86766e+08	2.20499e+08	2.65617e+08	2.61733e+08	3.86458e+08	4.1542e+08	19	18	20	18	19	20	1
CAA68286.1	unnamed protein product [OS=Homo sapiens]	0	424.923	61	42	326	42	673	75.8	5.6	762.5	42	Pf00191	309	ANXA6	5		Calcium Regulation in the Cardiac Cell; Prostaglandin Synthesis and Regulation			2	0	0.932	0.740709	29.08	93.1	111.4	1.97	13.54	5.83237e+08	4.90926e+08	5.37108e+08	7.34904e+08	6.10568e+08	5.48863e+08	37	36	37	39	38	38	1
NP_006657.1	ruvB-like 2 isoform 1 [OS=Homo sapiens]	0	170.736	61	24	142	24	463	51.1	5.64	268.87	24	Pf00004, Pf03796, Pf06068, Pf13481	10856	RUVBL2	19	ENSG00000183207.13			HATs acetylate histones; Telomere Extension By Telomerase	8	0	1.005	0.903311	31.54	94	99.2	7.91	6.38	1.68686e+08	1.4417e+08	1.81025e+08	1.62271e+08	1.60662e+08	1.76827e+08	22	23	23	23	23	23	1	Met-loss+Acetyl [N-Term]
AAB05662.1	Cu/Zn-superoxide dismutase [OS=Homo sapiens]	0	222.785	61	11	127	11	154	15.9	6.32	388.66	11	Pf00080	6647	SOD1	21		Selenium Micronutrient Network; Vitamin B12 Metabolism; Folate Metabolism; AGE/RAGE pathway; Dopamine metabolism; Amyotrophic lateral sclerosis (ALS); Oxidative Stress			7	0	1.098	0.968436	28.92	95.3	113.3	2.68	5.17	2.94007e+08	2.64644e+08	2.7285e+08	3.05431e+08	3.31985e+08	3.13107e+08	10	10	10	11	10	10	1
NP_060518.1	protein mago nashi homolog 2 isoform 1 [OS=Homo sapiens]	0	56.116	61	7	32	7	148	17.3	6.39	50.17	7	Pf02792	55110	MAGOHB	12	ENSG00000111196.9		mRNA surveillance pathway; Spliceosome; RNA transport	mRNA 3'-end processing; mRNA Splicing - Major Pathway; Cleavage of Growing Transcript in the Termination Region ; Regulation of expression of SLITs and ROBOs; Transport of Mature mRNA derived from an Intron-Containing Transcript; Nonsense Mediated Decay (NMD) enhanced by the Exon Junction Complex (EJC)	20	0	1.005	0.903658	26.72	97.4	91.3	3.42	3.89	4.19337e+07	3.75723e+07	3.81763e+07	3.61802e+07	3.41163e+07	3.66041e+07	5	6	5	5	5	5	1
BAG57447.1	unnamed protein product [OS=Homo sapiens]	0	199.36	61	15	134	0	227	25.4	10.99	439.26	15	Pf00573	6124	RPL4	15		Cytoplasmic Ribosomal Proteins			1	0																				1	Met-loss+Acetyl [N-Term]
NP_060308.1	H/ACA ribonucleoprotein complex subunit 2 isoform a [OS=Homo sapiens]	0	48.008	61	5	17	5	153	17.2	8.22	51.91	5	Pf01248	55651	NHP2	5	ENSG00000145912.8		Ribosome biogenesis in eukaryotes	rRNA modification in the nucleus and cytosol; Telomere Extension By Telomerase	10	0	0.857	0.466408	27.33	105.1	100.6	9.13	18.97	8.66813e+06	6.34448e+06	7.29737e+06	8.32288e+06	5.59386e+06	6.58806e+06	3	3	3	2	2	2	1	Met-loss [N-Term]
NP_001123528.1	elongation factor 1-delta isoform 4 [OS=Homo sapiens]	0	144.278	61	13	115	1	257	28.5	4.92	259.97	13	Pf00736, Pf10587	1936	EEF1D	8; CHR_HSCHR8_3_CTG7	ENSG00000104529.17; ENSG00000273594.4	Translation Factors			1	0	5.164	2.19299e-12	42.46	127.3	24.7	8.49	114.42	5797482	4399014	4751914	698221	880277	5.30141e+06	1	1	1	1	1	1	1	Met-loss+Acetyl [N-Term]
NP_036243.1	activator of 90 kDa heat shock protein ATPase homolog 1 isoform 1 [OS=Homo sapiens]	0	131.482	61	15	66	15	338	38.3	5.53	192.26	15	Pf08327, Pf09229	10598	AHSA1	14	ENSG00000100591.7	T-Cell antigen Receptor (TCR) pathway during Staphylococcus aureus infection			1	0	0.986	0.865522	23.41	95.5	110.3	17.5	10.57	1.14236e+08	7.31978e+07	8.28684e+07	9.27929e+07	9.53209e+07	7.69206e+07	15	12	14	13	14	13	1
NP_005989.3	T-complex protein 1 subunit gamma isoform a [OS=Homo sapiens]	0	282.593	60	31	277	2	545	60.5	6.49	658.17	31	Pf00118	7203	CCT3	1	ENSG00000163468.14			BBSome-mediated cargo-targeting to cilium; Prefoldin mediated transfer of substrate to CCT/TriC; Cooperation of PDCL (PhLP1) and TRiC/CCT in G-protein beta folding; Association of TriC/CCT with target proteins during biosynthesis; Formation of tubulin folding intermediates by CCT/TriC; Folding of actin by CCT/TriC	13	0	1.039	0.963059	15.95	97.4	98.1	7.42	9.09	4.11846e+07	3.85768e+07	4.53493e+07	3.54408e+07	41345077	3.98371e+07	2	2	2	2	2	2	1	Acetyl [N-Term]
AAH08019.1	chaperonin containing TCP1, subunit 3 (gamma) [OS=Homo sapiens]	0	254.41	60	31	253	2	544	60.4	6.49	576.68	31	Pf00118	7203	CCT3	1					0	29	0.98	0.849243	20.61	98.3	100.1	5.84	5.28	520588515	4.10805e+08	448109884	4.68332e+08	4.13143e+08	4.30116e+08	29	28	29	28	29	30	1	Met-loss [N-Term]
NP_110379.2	T-complex protein 1 subunit alpha isoform a [OS=Homo sapiens]	0	277.065	60	31	266	31	556	60.3	6.11	682.26	31	Pf00118	6950	TCP1	6	ENSG00000120438.11			BBSome-mediated cargo-targeting to cilium; Prefoldin mediated transfer of substrate to CCT/TriC; Gene and protein expression by JAK-STAT signaling after Interleukin-12 stimulation; Cooperation of PDCL (PhLP1) and TRiC/CCT in G-protein beta folding; Association of TriC/CCT with target proteins during biosynthesis; Folding of actin by CCT/TriC; Formation of tubulin folding intermediates by CCT/TriC…	18	0	0.989	0.873578	29.62	98.8	102.6	0.29	4.47	3.67524e+08	3.18995e+08	3.47872e+08	3.61271e+08	323997894	3.40542e+08	31	30	30	29	31	31	1	Acetyl [N-Term]
AAC39842.1	beta-filamin [OS=Homo sapiens]	0	1169.7	60	116	930	1	2602	278	5.74	2271.82	116	Pf00307, Pf00630	2317	FLNB	3		VEGFA-VEGFR2 Signaling Pathway			1	0	0.909	0.667818	7.61	103.2	119.1	6.9	7.5	4.31796e+06	3.66082e+06	4.53247e+06	4.58794e+06	4.73971e+06	4.05145e+06	1	1	1	1	1	1	1	Met-loss [N-Term]
CAG33110.1	PpiB [OS=Homo sapiens]	0	128.47	60	15	115	15	216	23.7	9.41	166.1	15	Pf00160	5479	PPIB	15		Prolactin Signaling Pathway			1	0	1.28	0.622588	34.32	108.8	84.9	4.57	5.88	1.57696e+08	1.31806e+08	1.36645e+08	1.04664e+08	1.14947e+08	1.05555e+08	14	14	14	14	13	14	1
NP_001951.2	elongation factor 1-delta isoform 2 [OS=Homo sapiens]	0	167.395	60	14	136	2	281	31.1	5.01	317.86	14	Pf00736, Pf10587	1936	EEF1D	8; CHR_HSCHR8_3_CTG7	ENSG00000104529.17; ENSG00000273594.4	Translation Factors	Herpes simplex infection	Eukaryotic Translation Elongation	5	13	1.029	0.946225	22.38	110.6	82.5	5.04	11.37	4.50286e+08	3.58025e+08	3.96098e+08	2.86597e+08	2.63284e+08	3.24789e+08	14	14	14	15	14	14	1	Met-loss+Acetyl [N-Term]
BAG58909.1	unnamed protein product [OS=Homo sapiens]	0	64.099	60	7	41	7	120	13.3	8.91	116.54	7	Pf01423	6634	SNRPD3	22	ENSG00000100028.11	mRNA Processing			1	0	1.019	0.926451	29.24	100.5	99.8	2.58	4.89	5.81188e+07	5.07129e+07	5.27393e+07	5.40583e+07	5.20348e+07	4.79002e+07	6	6	5	6	6	4	1	Met-loss+Acetyl [N-Term]
AAI21795.1	valosin-containing protein [OS=Homo sapiens]	0	507.316	60	47	416	47	806	89.3	5.33	1274.17	47	Pf00004, Pf00910, Pf01057, Pf01078, Pf02359, Pf02933, Pf05496, Pf05673, Pf06068, Pf07724, Pf07726, Pf07728, Pf09336, Pf13191, Pf13207, Pf13401	7415	VCP	9					0	0	0.969	0.825772	27.85	106.8	90.7	5.43	4.78	6.58379e+08	6.37924e+08	6.78972e+08	5.25652e+08	5.66473e+08	5.43733e+08	45	43	42	39	40	43	1	Met-loss+Acetyl [N-Term]
BAG64197.1	unnamed protein product [OS=Homo sapiens]	0	247.733	60	24	227	2	507	56	5.94	551.57	24	Pf00118	22948	CCT5	5					0	21	1.191	0.813751	22.73	112.3	85.6	3.55	5.88	5.08156e+08	4.17204e+08	4.54261e+08	3.35723e+08	3.19093e+08	3.5449e+08	22	23	21	22	23	23	1	Met-loss+Acetyl [N-Term]
XP_016880250.1	PREDICTED: profilin-1 isoform X1 [OS=Homo sapiens]	0	188.587	60	11	505	4	181	19.6	7.12	1409.55	11	Pf00235	5216	PFN1	17		VEGFA-VEGFR2 Signaling Pathway; Regulation of Actin Cytoskeleton; G13 Signaling Pathway			3	0	1.083	0.98686	26.25	82.5	106.5	19.74	4.29	3.68337e+08	2.2998e+08	2.54745e+08	3.18542e+08	2.97205e+08	3.21476e+08	3	3	3	3	3	4	1	Met-loss+Acetyl [N-Term]
NP_056456.1	testin isoform 1 [OS=Homo sapiens]	0	186.789	60	18	145	18	421	48	7.68	320.88	18	Pf00412, Pf06297	26136	TES	7	ENSG00000135269.17				0	0	1.015	0.917292	38.94	110.1	88.4	9.76	25.06	1.97607e+08	1.52738e+08	1.55066e+08	1.8257e+08	1.26814e+08	1.11727e+08	14	15	15	16	15	14	1	Acetyl [N-Term]
NP_004069.1	cysteine and glycine-rich protein 1 isoform 1 [OS=Homo sapiens]	0	66.382	60	7	48	7	193	20.6	8.57	123.02	7	Pf00412	1465	CSRP1	1	ENSG00000159176.13	Mecp2 and Associated Rett Syndrome		MTF1 activates gene expression	4	0	0.793	0.249655	13.76	90.2	104.6	9.31	20.28	3.81697e+07	3.23729e+07	3.03266e+07	4.80451e+07	3.88062e+07	3.10236e+07	7	6	6	6	6	5	1
ACR14812.1	RPL27/NME2 fusion protein, partial [OS=Homo sapiens]	0	89.729	60	9	82	9	126	14.2	10.46	91.38	9	Pf00467, Pf01777								0	0	0.951	0.793816	20.95	94.2	107.2	10.24	4.32	3.22896e+08	2.33629e+08	2.62947e+08	2.99962e+08	2.69689e+08	2.82104e+08	8	9	9	8	6	7	1
NP_001611.1	Neuroblast differentiation-associated protein AHNAK isoform 1 [OS=Homo sapiens]	0	1481.45	59	172	997	172	5890	628.7	6.15	2504.85	172		79026	AHNAK	11	ENSG00000124942.13				0	0	0.994	0.887204	22.94	107.4	105.1	2.87	2.43	1.28037e+09	1.1838e+09	1.25008e+09	1.22927e+09	1.15045e+09	1.15418e+09	153	155	153	149	151	153	1
BAG70074.1	14-3-3 protein beta/alpha [OS=Homo sapiens]	0	175.059	59	18	185	12	246	28.1	4.83	311.94	18	Pf00244	7529	YWHAB	20		Cell Cycle; IL-3 Signaling Pathway; Myometrial Relaxation and Contraction Pathways; Calcium Regulation in the Cardiac Cell; Sudden Infant Death Syndrome (SIDS) Susceptibility Pathways			5	3	1.007	0.905161	26.71	111.4	88.7	2.44	5.06	6.99215e+08	5.99773e+08	6.32541e+08	5.30127e+08	4.93301e+08	4.66089e+08	14	15	15	14	15	15	1	Met-loss+Acetyl [N-Term]; Acetyl [N-Term]
AAH15130.1	Cytochrome c, somatic [OS=Homo sapiens]	0	58.071	59	9	58	9	105	11.8	9.63	112.65	9	Pf00034, Pf14495	54205	CYCS	7		AGE/RAGE pathway; Parkinsons Disease Pathway; Apoptosis; Fas Ligand (FasL) pathway and Stress induction of Heat Shock Proteins (HSP) regulation; Apoptosis Modulation by HSP70			5	0	1.412	0.315456	31.19	118.6	84.6	2.86	9.15	1.13713e+08	9.50606e+07	1.09186e+08	8.31902e+07	6.80648e+07	7.26517e+07	9	9	9	8	9	9	1
NP_005745.1	Ras GTPase-activating protein-binding protein 1 [OS=Homo sapiens]	0	205.687	59	19	202	2	466	52.1	5.52	395.92	19	Pf00076, Pf02136, Pf13893, Pf14259	10146	G3BP1	5	ENSG00000145907.14				0	16	1.271	0.647681	37.36	109.2	80	11.63	6.45	4.21878e+08	2.92241e+08	3.52778e+08	2.50793e+08	2.32491e+08	2.62362e+08	16	18	18	16	17	18	1	Met-loss [N-Term]
NP_001616.1	adenylate kinase 2, mitochondrial isoform a [OS=Homo sapiens]	0	69.234	59	10	50	10	239	26.5	7.81	92.91	10	Pf00406, Pf05191, Pf13207, Pf13671	204	AK2	1	ENSG00000004455.16		Metabolic pathways; Thiamine metabolism; Purine metabolism	Interconversion of nucleotide di- and triphosphates	6	0	0.885	0.575611	33.27	95.2	103.4	17.46	9.18	5.97543e+07	3.73495e+07	4.52401e+07	5.53144e+07	4.66824e+07	4.58389e+07	9	9	9	8	8	8	1	Met-loss [N-Term]
NP_005959.2	Heterogeneous nuclear ribonucleoprotein M isoform a [OS=Homo sapiens]	0	261.097	59	32	231	3	730	77.5	8.7	514.12	32	Pf00076, Pf11532, Pf11608, Pf13893, Pf14259	4670	HNRNPM	19	ENSG00000099783.11	mRNA Processing	Spliceosome	mRNA Splicing - Major Pathway; FGFR2 alternative splicing	11	29	1.101	0.967812	25.7	101.4	96	1.08	4.11	4.44363e+08	3.82385e+08	4.24786e+08	3.88544e+08	3.79337e+08	3.51049e+08	30	31	31	30	30	30	1	Met-loss+Acetyl [N-Term]
NP_001138303.1	Prohibitin-2 isoform 1 [OS=Homo sapiens]	0	154.83	59	16	153	16	299	33.3	9.83	254.16	16	Pf01145	11331	PHB2	12	ENSG00000215021.8			Processing of SMDT1	3	0	1.126	0.929691	23.8	103.2	85.7	7.39	6.32	4.42408e+08	3.38997e+08	3.72557e+08	3.13759e+08	2.71149e+08	2.91993e+08	16	16	16	16	16	16	1
AAF13605.1	BiP protein, partial [OS=Homo sapiens]	0	485.929	59	40	590	1	639	70.9	5.35	1504.02	40	Pf00012, Pf01968, Pf06723	3309	HSPA5	9		Parkin-Ubiquitin Proteasomal System pathway; Apoptosis-related network due to altered Notch3 in ovarian cancer; Photodynamic therapy-induced unfolded protein response; MAPK Signaling Pathway			4	0	0.119	3.42367e-10	55.34	29.1	243.7	23.86	98.99	44410.3	29179.7	51709.8	342778	1.35383e+06	208993	1	1	1	1	1	1	1
XP_005272536.1	PREDICTED: heterogeneous nuclear ribonucleoprotein M isoform X2 [OS=Homo sapiens]	0	248.234	59	30	215	1	712	75.6	8.57	499.68	30	Pf00076, Pf11532, Pf11608, Pf13893, Pf14259	4670	HNRNPM	19		mRNA Processing			1	0	1.217	0.772508	14.49	107.9	88.7	13.18	5.72	5207428	5873829	6.11057e+06	4.93518e+06	4.77129e+06	4.31464e+06	1	1	1	1	1	1	1	Met-loss+Acetyl [N-Term]
AAH00408.1	ACAT2 protein [OS=Homo sapiens]	0	163.804	59	13	81	13	397	41.4	6.92	308.3	13	Pf00108, Pf00109, Pf02803	39	ACAT2	6					0	0	1.034	0.955136	31.53	97.7	94	6.52	7.6	4.81947e+07	4.65877e+07	5.18258e+07	4.1989e+07	4.76224e+07	45986067	11	12	12	10	11	12	1	Acetyl [N-Term]
NP_001157789.1	Filamin-B isoform 1 [OS=Homo sapiens]	0	1154.4	59	116	928	1	2633	281.5	5.71	2244.64	116	Pf00307, Pf00630	2317	FLNB	3	ENSG00000136068.14	VEGFA-VEGFR2 Signaling Pathway			1	110	0.907	0.656837	30.35	99.1	107.8	13.28	3.73	1.30503e+09	1.41898e+09	1.59978e+09	1.53741e+09	1.59569e+09	1.60577e+09	101	109	107	106	105	107	1	Met-loss [N-Term]
BAA11338.1	proteasome subunit p42 [OS=Homo sapiens]	0	159.489	59	19	122	19	389	44.1	7.49	296.21	19	Pf00004, Pf00910, Pf01078, Pf05496, Pf07724, Pf07726, Pf07728, Pf13191, Pf13207, Pf13401	5706	PSMC6	14		Proteasome Degradation; Parkin-Ubiquitin Proteasomal System pathway			2	0	1.12	0.941066	38.71	111.5	88.2	4.26	6.9	1.29654e+08	1.22102e+08	1.32491e+08	1.01642e+08	1.10684e+08	9.67854e+07	18	18	18	18	18	17	1
NP_006363.4	Heterogeneous nuclear ribonucleoprotein Q isoform 1 [OS=Homo sapiens]	0	332.412	59	29	259	9	623	69.6	8.59	701.97	29	Pf00076, Pf13893, Pf14259	10492	SYNCRIP	6	ENSG00000135316.17				0	20	0.95	0.787659	39.96	96.3	101.9	3.48	4.62	3.65965e+08	3.02409e+08	3.51067e+08	3.49765e+08	3.497e+08	3.71329e+08	27	29	28	28	28	26	1	Met-loss+Acetyl [N-Term]
CAG38772.1	G3BP [OS=Homo sapiens]	0	179.925	59	18	196	1	466	52.1	5.59	366.66	18	Pf00076, Pf02136, Pf13893, Pf14259	10146	G3BP1	5					0	0	2.317	0.147183	3.63	29.6	12.8	9.12		475805	482013	537065	219356			1	1	1	1			1	Met-loss [N-Term]
NP_001650.1	ADP-ribosylation factor 3 [OS=Homo sapiens]	0	97.943	59	9	68	5	181	20.6	7.43	207.3	9	Pf00025, Pf00071, Pf00503, Pf01926, Pf04670, Pf08477, Pf09439	377	ARF3	12	ENSG00000134287.9		Endocytosis	Synthesis of PIPs at the Golgi membrane; COPI-dependent Golgi-to-ER retrograde traffic; COPI-mediated anterograde transport	17	3	0.912	0.678401	42.96	109.9	95.9	0.53	11.77	1.97144e+08	1.7347e+08	1.89075e+08	1.74652e+08	1.56291e+08	1.34059e+08	8	6	7	8	7	7	1
CAA59127.1	ribosomal protein S15A [OS=Homo sapiens]	0	76.669	58	9	76	1	130	14.8	10.13	153.09	9	Pf00410	6210	RPS15A	16		Cytoplasmic Ribosomal Proteins			1	0	0.633	0.0126211	13.41	69.7	108.3	19.44	8.48	3.48939e+06	4.49489e+06	4.52392e+06	6330140	6.67817e+06	7.28851e+06	1	1	1	1	1	1	1	Met-loss [N-Term]
CAG33215.1	PDCD5 [OS=Homo sapiens]	0	71.966	58	8	66	8	125	14.3	7.4	116.63	8	Pf01984	9141	PDCD5	19					0	0	1.101	0.967855	19.58	103.4	94.6	9.38	5.83	1.36659e+08	1.01877e+08	1.10653e+08	9.4113e+07	9.63384e+07	1.02701e+08	7	7	6	7	6	6	1	Met-loss+Acetyl [N-Term]
EAW62274.1	S-phase kinase-associated protein 1A (p19A), isoform CRA_d [OS=Homo sapiens]	0	41.92	58	5	29	5	168	19.2	4.56	66.09	5	Pf01466, Pf03931	6500	SKP1	5		TNF alpha Signaling Pathway; TGF-beta Signaling Pathway; Notch Signaling Pathway			3	0	1.554	0.123486	50.87	107.1	93.7	7.51	8.61	4.32454e+07	3.39044e+07	3.56309e+07	3.34975e+07	2.76211e+07	3.04371e+07	4	5	4	4	5	5	1
XP_011526370.1	PREDICTED: peptidyl-prolyl cis-trans isomerase NIMA-interacting 1 isoform X1 [OS=Homo sapiens]	0	31.778	58	5	10	5	168	18.8	8.84	23.77	5	Pf00397, Pf00639, Pf13145, Pf13616	5300	PIN1	19					0	0	1.003	0.899032	29.94	103.7	107.5	47.85	9.88	2.88973e+06	7.46579e+06	7.30839e+06	6.6041e+06	7.89193e+06	7.14368e+06	3	4	4	4	4	4	1
NP_006397.1	peroxiredoxin-4 precursor [OS=Homo sapiens]	0	96.066	58	10	70	8	271	30.5	6.29	135.56	10	Pf00578, Pf08534, Pf10417	10549	PRDX4	X	ENSG00000123131.12	Selenium Micronutrient Network		Neutrophil degranulation	4	0	0.915	0.68574	37.47	96.8	104	19.36	7.79	3.59444e+07	2.3224e+07	2.43447e+07	2.89883e+07	2.43947e+07	25592267	7	7	8	6	6	6	1
BAA07919.1	26S proteasome subunit P45 [OS=Homo sapiens]	0	162.49	58	20	143	1	406	45.6	8.18	285.85	20	Pf00004, Pf00910, Pf01057, Pf01078, Pf05496, Pf06068, Pf06414, Pf07724, Pf07726, Pf07728, Pf13191, Pf13207, Pf13401	5705	PSMC5	17		Proteasome Degradation; Parkin-Ubiquitin Proteasomal System pathway			2	18	1.085	0.98381	24.64	103.3	94.7	10.21	11.46	9.1096e+07	9.17782e+07	1.05936e+08	8.87364e+07	8.58764e+07	1.03993e+08	17	18	18	17	17	17	1	Met-loss+Acetyl [N-Term]
BAD92402.1	ribosomal protein S10 variant, partial [OS=Homo sapiens]	0	76.642	58	10	71	1	174	19.8	9.91	138.19	10	Pf03501	6204	RPS10	6		Cytoplasmic Ribosomal Proteins			1	0	0.841	0.411652	8.26	82.6	98.5	6.83	9.92	5.68423e+06	5.44648e+06	6.17748e+06	6.84949e+06	5.75453e+06	6.92435e+06	1	1	1	1	1	1	1
NP_003786.1	sorting nexin-3 isoform a [OS=Homo sapiens]	0	31.155	58	9	43	8	162	18.8	8.66	61.45	9	Pf00787	8724	SNX3	6	ENSG00000112335.14		Endocytosis	WNT ligand biogenesis and trafficking; Ub-specific processing proteases	8	1	1.219	0.768555	31.9	98.5	89.1	8.98	2.82	7.27812e+07	5.35575e+07	6.10272e+07	5.60325e+07	52186902	5.20917e+07	7	7	7	8	8	8	1	Met-loss+Acetyl [N-Term]
BAG57331.1	unnamed protein product [OS=Homo sapiens]	0	149.988	58	14	128	2	183	20.1	8.78	339.69	14	Pf00578, Pf08534, Pf13905	7001	PRDX2	19		Selenium Micronutrient Network			1	11	1.132	0.917292	40.26	100.7	98.6	1.5	3.63	2.14738e+08	1.92811e+08	2.08688e+08	1.89481e+08	1.9413e+08	1.98171e+08	13	11	12	13	12	12	1
NP_001677.2	ATP synthase subunit beta, mitochondrial precursor [OS=Homo sapiens]	0	278.616	58	23	250	23	529	56.5	5.4	798.88	23	Pf00006, Pf00306, Pf02874	506	ATP5B	12	ENSG00000110955.8	Electron Transport Chain; Oxidative phosphorylation	Alzheimer's disease; Metabolic pathways; Parkinson's disease; Oxidative phosphorylation; Huntington's disease	Transcriptional activation of mitochondrial biogenesis; Cristae formation; Mitochondrial protein import; Formation of ATP by chemiosmotic coupling; Metabolism of proteins	17	0	1.133	0.917268	24.48	105.6	88.2	3.03	5.24	4.90869e+08	4.0782e+08	4.41528e+08	3.4025e+08	3.70336e+08	3.49538e+08	22	22	21	22	22	22	1	Acetyl [N-Term]
NP_001027459.1	Ubiquitin-conjugating enzyme E2 variant 1 isoform d [OS=Homo sapiens]	0	49.099	58	6	41	4	147	16.5	7.93	112.44	6	Pf00179	7335; 387522	UBE2V1; TMEM189-UBE2V1	20	ENSG00000244687.11	IL-1 signaling pathway; Interleukin-1 Induced Activation of NF-kappa-B; Simplified Depiction of MYD88 Distinct Input-Output Pathway		IRAK1 recruits IKK complex upon TLR7/8 or 9 stimulation; Downstream TCR signaling; NOD1/2 Signaling Pathway; IKK complex recruitment mediated by RIP1; TICAM1, RIP1-mediated IKK complex recruitment ; TAK1 activates NFkB by phosphorylation and activation of IKKs complex; Antigen processing: Ubiquitination & Proteasome degradation; FCERI mediated NF-kB activation; Activated TLR4 signalling; Interleu…	46	2	1.05	0.972049	15.49	115	81.8	5.06	8.07	6.14521e+07	5.63624e+07	5.5396e+07	4.0227e+07	3.85999e+07	4.43599e+07	6	6	6	6	6	6	1	Met-loss+Acetyl [N-Term]
CAA50685.1	IEF SSP 9306 [OS=Homo sapiens]	0	99.644	58	13	75	11	410	46.1	5.07	188.87	13	Pf00400, Pf12265	5928	RBBP4	1	ENSG00000162521.18	Retinoblastoma (RB) in Cancer; Interactome of polycomb repressive complex 2 (PRC2)			2	2	1.429	0.282928	30.57	114.3	86.6	3.24	6.53	7.08972e+07	6.33743e+07	7.1752e+07	4.67808e+07	4.96287e+07	5.18627e+07	11	12	11	10	8	11	1	Met-loss+Acetyl [N-Term]
NP_004037.1	ATP synthase subunit alpha, mitochondrial isoform a precursor [OS=Homo sapiens]	0	259.196	58	28	218	28	553	59.7	9.13	580.67	28	Pf00006, Pf00306, Pf02663, Pf02874, Pf05943	498	ATP5A1	18	ENSG00000152234.15	Electron Transport Chain; Oxidative phosphorylation	Oxidative phosphorylation; Huntington's disease; Alzheimer's disease; Metabolic pathways; Parkinson's disease	Cristae formation; Mitochondrial protein import; Formation of ATP by chemiosmotic coupling; Metabolism of proteins	16	0	1.054	0.977891	21.78	99.1	95.9	6.87	3.8	5.08496e+08	3.88371e+08	4.41752e+08	3.96144e+08	4.06227e+08	4.15783e+08	26	23	24	24	22	26	1
BAF83082.1	unnamed protein product [OS=Homo sapiens]	0	260.719	58	23	227	1	541	59.7	5.52	601.3	23	Pf00118	22948	CCT5	5					0	0	1.771	0.0195387	31.16	114.2	75.1	24.88	11.92	18534990	1.41345e+07	24516362	9519560	1.18422e+07	1.09185e+07	1	2	2	2	2	2	1	Met-loss+Acetyl [N-Term]
AAC99402.1	proteasome subunit HSPC [OS=Homo sapiens]	0	106.884	58	12	86	12	248	27.9	8.46	228.2	12	Pf00227, Pf10584	5688	PSMA7	20		Proteasome Degradation			1	0	1.021	0.932803	20.01	99.5	96.8	0.65	1.61	1.2456e+08	1.10004e+08	1.1956e+08	1.13668e+08	1.07989e+08	1.09734e+08	12	11	11	11	11	12	1
NP_000684.2	aldehyde dehydrogenase family 1 member A3 isoform 1 [OS=Homo sapiens]	0	212.607	58	22	160	22	512	56.1	7.25	365.39	22	Pf00171	220	ALDH1A3	15	ENSG00000184254.16	Vitamin A and Carotenoid Metabolism	Metabolism of xenobiotics by cytochrome P450; Tyrosine metabolism; Metabolic pathways; Chemical carcinogenesis; beta-Alanine metabolism; Phenylalanine metabolism; Drug metabolism - cytochrome P450; Histidine metabolism; Glycolysis / Gluconeogenesis	RA biosynthesis pathway	14	0	0.835	0.387906	42.97	64.1	101.1	21.69	15.43	9.83439e+07	1.3357e+08	1.29784e+08	1.51098e+08	1.97799e+08	1.93066e+08	20	18	18	19	19	20	1	Met-loss+Acetyl [N-Term]
BAD97029.1	ribosomal protein L10 variant, partial [OS=Homo sapiens]	0	154.998	57	16	124	16	214	24.5	10.08	314.61	16	Pf00252	6134	RPL10	X		Cytoplasmic Ribosomal Proteins			1	0	1.244	0.712273	36.07	93.4	106.5	1.24	3.4	2.36613e+08	2.03483e+08	2.19198e+08	2.46136e+08	2.26696e+08	2.38096e+08	13	14	14	17	16	17	1
EAW70571.1	ribosomal protein L37a, isoform CRA_c [OS=Homo sapiens]	0	31.714	57	4	35	4	68	7.6	10.01	39.76	4	Pf01780	6168	RPL37A	2	ENSG00000197756.9	Cytoplasmic Ribosomal Proteins			1	0	1.111	0.955136	35.16	109.6	90.7	16.35	8.29	1.49882e+08	1.08068e+08	103205716	1.07356e+08	9.24487e+07	8.99136e+07	4	4	4	4	4	4	1
NP_001268658.1	dynein light chain roadblock-type 1 isoform c [OS=Homo sapiens]	0	32.826	57	4	33	1	103	11.8	9.38	92.11	4	Pf03259	83658	DYNLRB1	20					0	0	2.131	0.227579	95	87.5	41	51.25	96.68	690395	282095		88450.5	461278		1	1		1	1		1
NP_055070.1	protein canopy homolog 2 isoform 1 precursor [OS=Homo sapiens]	0	83.772	57	8	52	8	182	20.6	4.92	135.89	8	Pf11938	10330	CNPY2	12	ENSG00000257727.5				0	0	0.961	0.802897	29.8	107.1	102.6	3.48	9.16	3.58215e+07	2.99747e+07	3.17548e+07	3.02843e+07	3.43897e+07	2.90422e+07	5	5	5	6	6	7	1
AAK07520.1	PNAS-18 [OS=Homo sapiens]	0	13.963	57	2	6	2	63	7.6	10.43	13.05	2	Pf01111	1163	CKS1B	1	ENSG00000173207.12				0	0	3.506	2.47383e-11	37.95	157.3	50.2	26.44	4.82	1.62679e+07	9.1839e+06	1.00646e+07	3.00355e+06	3.05132e+06	3.21333e+06	2	2	2	2	2	2	1
AAH98112.1	HIST2H2BE protein [OS=Homo sapiens]	0	89.855	57	10	409	3	126	13.9	10.32	442.39	10	Pf00125, Pf00808	8349	HIST2H2BE	1					0	0	0.847	0.428524	12.44	90.7	109.2	3.52	6.24	2.01928e+08	1.89076e+08	2.00208e+08	2.11959e+08	229011461	2.32292e+08	3	3	3	3	3	3	1
NP_006077.2	tubulin beta-3 chain isoform 1 [OS=Homo sapiens]	0	370.81	57	24	514	6	450	50.4	4.93	1231.59	24	Pf00091, Pf03953, Pf10644	10381	TUBB3	16	ENSG00000258947.6	Pathogenic Escherichia coli infection; Parkin-Ubiquitin Proteasomal System pathway; Exercise-induced Circadian Regulation	Gap junction; Phagosome; Pathogenic Escherichia coli infection	COPI-independent Golgi-to-ER retrograde traffic; COPI-dependent Golgi-to-ER retrograde traffic; Carboxyterminal post-translational modifications of tubulin; Recruitment of NuMA to mitotic centrosomes; Hedgehog 'off' state; Translocation of GLUT4 to the plasma membrane; Prefoldin mediated transfer of substrate to CCT/TriC; Microtubule-dependent trafficking of connexons from Golgi to the plasma mem…	66	2	1.174	0.847225	28.79	120	87.6	7.29	22.06	5.12451e+07	3.87792e+07	4.44614e+07	2.74807e+07	3.08461e+07	4.07072e+07	7	7	7	6	6	7	1
AAP97261.1	Heparin-binding protein HBp15 [OS=Homo sapiens]	0	55.598	57	7	42	7	128	14.8	9.32	98.86	7	Pf01776								0	0	1.097	0.968651	15.55	100.8	92.8	4.74	7.28	2.72442e+08	2.36554e+08	2.37377e+08	2.3005e+08	1.97992e+08	2.23398e+08	7	7	6	6	6	7	1
AAH66320.1	ribosomal protein L13 [OS=Homo sapiens]	0	154.687	57	18	166	18	211	24.3	11.65	294.45	18	Pf01294	6137	RPL13	16		Cytoplasmic Ribosomal Proteins			1	0	1.127	0.927159	31.34	103.2	92.9	5.15	6.06	6.76525e+08	6.34334e+08	6.24916e+08	5.7941e+08	5.04108e+08	5.45167e+08	17	17	17	18	16	17	1
AAH16736.1	HNRPF protein [OS=Homo sapiens]	0	144.61	57	15	110	13	415	45.7	5.58	230.36	15	Pf00076, Pf08080, Pf14259	3185	HNRNPF	10					0	0	0.953	0.795319	31.61	100.1	98.4	5.09	4.15	2.08836e+08	1.8788e+08	2.1881e+08	1.94933e+08	177574323	1.8955e+08	12	12	12	11	11	13	1	Met-loss+Acetyl [N-Term]
NP_000010.1	acetyl-CoA acetyltransferase, mitochondrial precursor [OS=Homo sapiens]	0	149.193	57	17	79	17	427	45.2	8.85	253.26	17	Pf00108, Pf00109, Pf02803	38	ACAT1	11	ENSG00000075239.13	Fatty Acid Beta Oxidation; Synthesis and Degradation of Ketone Bodies; Tryptophan metabolism	Glyoxylate and dicarboxylate metabolism; Synthesis and degradation of ketone bodies; Carbon metabolism; Butanoate metabolism; Valine, leucine and isoleucine degradation; Metabolic pathways; Pyruvate metabolism; Propanoate metabolism; Fatty acid metabolism; Tryptophan metabolism; Terpenoid backbone biosynthesis; Lysine degradation; Fatty acid degradation	Synthesis of Ketone Bodies; Branched-chain amino acid catabolism; Utilization of Ketone Bodies	23	0	1.1	0.968415	26.82	93.2	99.4	14.3	5.05	5.48063e+07	38090184	4.05716e+07	4.4505e+07	3.94408e+07	4.16975e+07	14	13	13	15	13	16	1
NP_002145.3	Heat shock 70 kDa protein 4 [OS=Homo sapiens]	0	475.351	57	43	335	40	840	94.3	5.19	900.76	43	Pf00012, Pf06723	3308	HSPA4	5	ENSG00000170606.14	Parkin-Ubiquitin Proteasomal System pathway	Antigen processing and presentation	Regulation of HSF1-mediated heat shock response	6	0	0.966	0.81775	31.08	98.3	101.6	1.83	2.88	3.56375e+08	3.01558e+08	3.27725e+08	3.29645e+08	3.22066e+08	3.04526e+08	38	38	36	37	36	38	1
AAA86443.1	glycyl-tRNA synthetase [OS=Homo sapiens]	0	268.374	57	28	178	1	685	77.5	6.24	430.22	28	Pf00458, Pf00587, Pf03129	2617	GARS	7					0	0	0.877	0.55735	23.85	87.7	100	9.56	84.11	4.97016e+06	3.85693e+06	3.91323e+06	5.38417e+06	4.54558e+06	122305	1	1	1	1	1	1	1	Acetyl [N-Term]
AAH12292.1	Heat shock 27kDa protein 1 [OS=Homo sapiens]	0	94.744	57	8	80	2	205	22.8	6.4	232.24	8	Pf00011	3315	HSPB1	7		Apoptosis-related network due to altered Notch3 in ovarian cancer; Fas Ligand (FasL) pathway and Stress induction of Heat Shock Proteins (HSP) regulation; MAPK Signaling Pathway; VEGFA-VEGFR2 Signaling Pathway; p38 MAPK Signaling Pathway			5	0	1.191	0.814193	49.15	100.6	116.3	26.13	6.08	1.63777e+07	8.5252e+06	1.16122e+07	1.23244e+07	1.27515e+07	1.35324e+07	2	2	2	2	2	2	1
NP_005338.1	78 kDa glucose-regulated protein precursor [OS=Homo sapiens]	0	497.458	56	40	610	1	654	72.3	5.16	1567.1	40	Pf00012, Pf01968, Pf06723	3309	HSPA5	9	ENSG00000044574.7	Parkin-Ubiquitin Proteasomal System pathway; Apoptosis-related network due to altered Notch3 in ovarian cancer; Photodynamic therapy-induced unfolded protein response; MAPK Signaling Pathway	Protein processing in endoplasmic reticulum; Thyroid hormone synthesis; Prion diseases; Antigen processing and presentation; Protein export	Platelet degranulation ; PERK regulates gene expression; ATF6 (ATF6-alpha) activates chaperone genes; Antigen Presentation: Folding, assembly and peptide loading of class I MHC; Regulation of HSF1-mediated heat shock response; IRE1alpha activates chaperones	27	37	0.708	0.0732152	26.79	80.3	122.5	1.07	5.54	9.54289e+08	8.39867e+08	8.94264e+08	1.47046e+09	1.30932e+09	1.30362e+09	34	35	34	35	35	36	1
BAG59536.1	unnamed protein product [OS=Homo sapiens]	0	49.688	56	8	54	8	218	23	9.57	95.57	8		90861	HN1L; JPT2	16	ENSG00000206053.12				0	0	1.013	0.915753	17.36	103.7	95.3	3.06	5.35	2.79381e+07	2.54505e+07	2.8162e+07	2.46545e+07	2.31637e+07	2.5559e+07	7	7	7	7	7	7	1
NP_001290430.1	calponin-2 isoform d [OS=Homo sapiens]	0	155.384	56	14	120	14	330	35.9	7.3	311.82	14	Pf00307, Pf00402	1265	CNN2	19	ENSG00000064666.14	Myometrial Relaxation and Contraction Pathways			1	0	1.168	0.859085	32.89	113.7	91.7	14.01	18.09	1.98859e+08	215738513	2.48921e+08	1.42647e+08	1.79835e+08	2.00328e+08	13	14	14	13	13	14	1	Met-loss+Acetyl [N-Term]
AAB91536.1	cell cycle protein p38-2G4 homolog [OS=Homo sapiens]	0	220.934	56	23	151	23	394	43.8	6.55	374.94	23	Pf00557	5036	PA2G4	12					0	0	1.08	0.988452	43.93	106.5	96.4	11.18	8.71	3.91888e+08	2.78008e+08	3.16216e+08	3.16268e+08	2.72072e+08	2.62016e+08	20	20	18	21	22	21	1	Met-loss+Acetyl [N-Term]
AAA58371.1	apurinic endonuclease [OS=Homo sapiens]	0	144.506	56	11	70	1	318	35.6	8.12	187.23	11	Pf03372, Pf14529	328	APEX1	14		Human Thyroid Stimulating Hormone (TSH) signaling pathway			1	10	1.001	0.893881	20.24	97.2	102.4	5.14	7.41	8.25936e+07	6.55103e+07	7.2627e+07	7.42314e+07	6.77988e+07	7.80417e+07	11	10	11	9	9	11	1
BAA02633.1	Apex nuclease [OS=Homo sapiens]	0	142.764	56	11	71	1	318	35.5	8.12	188.36	11	Pf03372, Pf14529	328	APEX1	14		Human Thyroid Stimulating Hormone (TSH) signaling pathway			1	0																				1
ABO65079.1	peroxiredoxin 6, partial [OS=Homo sapiens]	0	21.957	56	5	6	5	80	9	5.15	11.6	5	Pf00578	9588	PRDX6	1					0	0	1.376	0.388603	19.97	121.4	97.1	11.79	7.98	3.37128e+07	2.50855e+07	2.55686e+07	2.16695e+07	2.07386e+07	18112991	3	3	3	3	3	2	1
BAG38086.1	unnamed protein product [OS=Homo sapiens]	0	187.985	56	20	128	20	475	51.6	8.22	285.87	20	Pf01213, Pf07986, Pf08603	10487	CAP1	1		Angiopoietin Like Protein 8 Regulatory Pathway; Insulin Signaling			2	0	0.916	0.689036	41.6	93.8	101	9.67	6.78	1.36297e+08	1.42209e+08	1.52847e+08	1.59605e+08	1.67964e+08	1.45634e+08	18	19	19	19	20	20	1	Met-loss+Acetyl [N-Term]
AAH51814.1	YWHAZ protein, partial [OS=Homo sapiens]	0	264.901	56	21	390	3	320	35.3	7.21	680.99	21	Pf00244	7534	YWHAZ	8		Cell Cycle; Prolactin Signaling Pathway; Pathogenic Escherichia coli infection; Myometrial Relaxation and Contraction Pathways; Calcium Regulation in the Cardiac Cell; Sudden Infant Death Syndrome (SIDS) Susceptibility Pathways			6	18	0.912	0.678643	32.99	104.2	96.7	4.57	0.65	6.57132e+08	5.83082e+08	5.81299e+08	5.66278e+08	5.47987e+08	5.46017e+08	19	21	20	20	22	20	1
AAH00047.2	RPL8 protein, partial [OS=Homo sapiens]	0	238.54	56	13	165	4	211	22.9	10.55	527.38	13	Pf00181, Pf03947	6132	RPL8	8		Cytoplasmic Ribosomal Proteins			1	0	1.048	0.970674	20.56	101.1	97	5.09	6.43	4.24955e+07	3.65729e+07	3.66652e+07	3.31013e+07	3.64138e+07	3.60037e+07	4	4	4	4	4	4	1
AAV38817.1	Tyrosine 3-monooxygenase/tryptophan 5-monooxygenase activation protein, theta polypeptide [OS=Homo sapiens]	0	175.676	56	17	301	3	245	27.7	4.82	441.57	17	Pf00244	10971	YWHAQ	2		Cell Cycle; Pathogenic Escherichia coli infection; IL-3 Signaling Pathway; Myometrial Relaxation and Contraction Pathways; Calcium Regulation in the Cardiac Cell; Sudden Infant Death Syndrome (SIDS) Susceptibility Pathways			6	10	1.062	0.988004	28.69	105.9	91.6	2.47	6.2	3.00514e+08	2.62583e+08	2.73414e+08	2.63321e+08	2.34381e+08	2.28777e+08	13	13	13	12	12	13	1	Acetyl [N-Term]
BAD96188.1	ribosomal protein P0 variant, partial [OS=Homo sapiens]	0	191.278	56	15	190	15	317	34.3	5.97	530.57	15	Pf00428, Pf00466	6175	RPLP0	12		Cytoplasmic Ribosomal Proteins			1	0	0.998	0.890905	45.09	80.9	133.7	8.63	1.43	2.20005e+08	1.62682e+08	2.02552e+08	3.24381e+08	3.245e+08	3.13442e+08	12	14	13	13	13	14	1
NP_055075.1	Prefoldin subunit 6 [OS=Homo sapiens]	0	26.116	56	5	26	5	129	14.6	8.88	37.33	5	Pf01920, Pf15499	10471	PFDN6	6; CHR_HSCHR6_MHC_COX_CTG1; CHR_HSCHR6_MHC_DBB_CTG1; CHR_HSCHR6_MHC_MCF_CTG1; CHR_HSCHR6_MHC_QBL_CTG1	ENSG00000204220.11; ENSG00000237335.8; ENSG00000224782.8; ENSG00000235692.8; ENSG00000206283.10			Prefoldin mediated transfer of substrate to CCT/TriC	5	0	1.279	0.624205	30.25	110	96.1	3.16	2.76	2.41411e+07	2.0782e+07	2.15692e+07	1.91402e+07	1.93746e+07	1.82064e+07	5	4	3	5	4	5	1
BAE45763.1	putative protein product of Nbla10058 [OS=Homo sapiens]	0	165.897	56	18	146	18	433	48.6	6.13	390.95	18	Pf00004, Pf00158, Pf07724, Pf07726, Pf07728, Pf13191, Pf13401	5701	PSMC2	7		Proteasome Degradation; Parkin-Ubiquitin Proteasomal System pathway			2	0	1.302	0.565834	30.2	113.7	89.2	3.69	5.16	2.11246e+08	1.74955e+08	1.86942e+08	1.38565e+08	1.50451e+08	1.40793e+08	17	16	17	17	15	15	1	Met-loss [N-Term]
AAH12197.1	Ribosomal protein L8 [OS=Homo sapiens]	0	136.662	56	15	108	6	257	28	11.03	185.61	15	Pf00181, Pf03947	6132	RPL8	8		Cytoplasmic Ribosomal Proteins			1	9	1.085	0.983805	35.62	102	97.1	5.83	12.53	6.27523e+08	5.4873e+08	6.58575e+08	6.26869e+08	5.3984e+08	4.74728e+08	12	11	11	11	12	12	1
BAC05327.1	unnamed protein product [OS=Homo sapiens]	0	95.303	56	9	53	2	293	32.5	7.21	183.32	9	Pf01048	4860	PNP	14					0	7	1.028	0.945386	60.04	101.9	100.4	26.39	3.1	2.49206e+07	1.29156e+07	1.75741e+07	1.66427e+07	1.72647e+07	1.63198e+07	8	9	9	7	9	8	1	Acetyl [N-Term]
NP_005720.1	peptidyl-prolyl cis-trans isomerase F, mitochondrial precursor [OS=Homo sapiens]	0	54.035	56	6	30	6	207	22	9.38	81.21	6	Pf00160	10105	PPIF	10	ENSG00000108179.13		Calcium signaling pathway; Huntington's disease; Parkinson's disease; cGMP-PKG signaling pathway; Toxoplasmosis		5	0	0.764	0.170631	52.79	75.2	113.2	25.54	7.95	1.88596e+07	1.09456e+07	1.16788e+07	1.73754e+07	1.52777e+07	1.77556e+07	6	6	6	6	5	6	1
NP_001032900.1	3-hydroxyacyl-CoA dehydrogenase type-2 isoform 2 [OS=Homo sapiens]	0	151.637	56	11	93	3	252	26	7.21	330.79	11	Pf00106, Pf08659, Pf13561	3028	HSD17B10	X	ENSG00000072506.12	Alzheimers Disease; Valproic acid pathway; Tryptophan metabolism			3	8	1.177	0.83995	25.07	107.1	91.7	15.37	2.55	1.17051e+08	8.33093e+07	8.29253e+07	7.84009e+07	7.36903e+07	7.28735e+07	10	11	11	11	11	11	1
EAW51019.1	hCG1748409, isoform CRA_b [OS=Homo sapiens]	0.035	1.302	56	1	1	1	45	4.8	8.38	0	1									0	0																				1	Met-loss [N-Term]
BAG62363.1	unnamed protein product [OS=Homo sapiens]	0	54.188	55	3	32	1	101	11.2	5.39	142.02	3	Pf00578, Pf08534	9588	PRDX6	1					0	0	1.127	0.925854	18.19	99.8	98.1	7.25	24.72	2.08604e+07	1.87277e+07	2.26709e+07	1.21673e+07	19108593	1.88891e+07	1	1	1	1	1	1	1	Met-loss [N-Term]
BAD96198.1	chaperonin containing TCP1, subunit 7 (eta) variant, partial [OS=Homo sapiens]	0	214.507	55	27	180	27	543	59.3	7.65	425.47	27	Pf00118	10574	CCT7	2					0	0	1.07	0.997135	32.62	104.7	92.7	6.34	7.1	3.10009e+08	2.39557e+08	2.70075e+08	2.2829e+08	2.27249e+08	2.52375e+08	24	25	25	24	24	27	1	Acetyl [N-Term]
NP_001121188.1	electron transfer flavoprotein subunit alpha, mitochondrial isoform b [OS=Homo sapiens]	0	89.221	55	12	59	1	284	30	8.57	160.64	12	Pf00766, Pf01012	2108	ETFA	15	ENSG00000140374.15				0	0																				1
AAH06547.1	EEF2 protein, partial [OS=Homo sapiens]	0	377.348	55	33	453	18	583	64.7	8.56	1099.65	33	Pf00009, Pf03144, Pf14492	1938	EEF2	19		Translation Factors; AMP-activated Protein Kinase (AMPK) Signaling; Brain-Derived Neurotrophic Factor (BDNF) signaling pathway			3	0	1.035	0.956303	27.41	103.1	94.4	2.45	5.06	7.19065e+08	5.9965e+08	6.7795e+08	6.49907e+08	5.79693e+08	5.85952e+08	18	17	18	17	18	18	1	Met-loss [N-Term]
BAF84286.1	unnamed protein product [OS=Homo sapiens]	0	45.499	55	9	46	9	244	26.7	9.17	80.64	9	Pf03587	10436	EMG1	12					0	0	0.913	0.680892	32.76	91.9	108.2	5.46	16.4	2.9628e+07	2.49533e+07	3.01866e+07	3.20978e+07	2.39903e+07	3.2812e+07	8	9	9	9	7	9	1	Met-loss+Acetyl [N-Term]
EAW93603.1	replication protein A3, 14kDa, isoform CRA_a [OS=Homo sapiens]	0	16.099	55	2	20	2	82	9.2	4.54	72.09	2	Pf08661	6119	RPA3	7	ENSG00000106399.11	Retinoblastoma (RB) in Cancer; G1 to S cell cycle control; DNA Replication			3	0	1.07	0.996616	48.35	102.3	81.5	10.28	39.26	1.24636e+07	1.14533e+07	1.43754e+07	4.52114e+06	9.42511e+06	1.02014e+07	2	2	2	2	2	2	1
NP_112420.1	heterogeneous nuclear ribonucleoprotein A1 isoform b [OS=Homo sapiens]	0	369.52	55	25	361	23	372	38.7	9.13	963.11	25	Pf00076, Pf13893, Pf14259	3178	HNRNPA1	12	ENSG00000135486.17	mRNA Processing	Spliceosome	mRNA Splicing - Major Pathway; FGFR2 alternative splicing	11	0	1.161	0.876115	50.97	119	85.2	7.76	2.76	1.30362e+09	1.06152e+09	1.05923e+09	7.88519e+08	7.85605e+08	8.09409e+08	20	21	18	22	22	21	1	Met-loss+Acetyl [N-Term]
NP_060979.2	Leucine-rich repeat-containing protein 59 [OS=Homo sapiens]	0	161.12	55	14	169	14	307	34.9	9.57	495.36	14	Pf12799, Pf13855	55379	LRRC59	17	ENSG00000108829.9				0	0	1.006	0.904538	36.16	98.7	107.7	18.39	3.95	2.11035e+08	1.31242e+08	1.54321e+08	1.55275e+08	1.60063e+08	1.63375e+08	13	12	12	13	13	14	1
AAA35568.1	aspartate aminotransferase precursor [OS=Homo sapiens]	0	231.08	55	18	147	18	430	47.4	9.01	390.39	18	Pf00226, Pf13355	2806	GOT2	16		Alanine and aspartate metabolism; Glycolysis and Gluconeogenesis			2	0	1.073	0.99814	22.62	96.6	97.8	12.11	3.38	3.16626e+08	2.25421e+08	2.45442e+08	2.35014e+08	2.46242e+08	2.34561e+08	18	18	18	18	18	18	1
NP_004598.1	Tubulin-specific chaperone A isoform 2 [OS=Homo sapiens]	0	67.417	55	6	40	6	108	12.8	5.29	84.45	6	Pf02970	6902	TBCA	5	ENSG00000171530.13			Post-chaperonin tubulin folding pathway	3	0	1.178	0.838547	25.24	111.5	81.8	3.64	5.14	1.65534e+08	138729232	146175541	107303297	100699204	110699781	6	6	6	6	6	6	1
NP_001427.2	rRNA 2'-O-methyltransferase fibrillarin [OS=Homo sapiens]	0	150.477	55	12	102	12	321	33.8	10.18	249.34	12	Pf01135, Pf01269, Pf13847	2091	FBL	19; CHR_HG2021_PATCH	ENSG00000280548.3; ENSG00000105202.8		Ribosome biogenesis in eukaryotes	Major pathway of rRNA processing in the nucleolus and cytosol; rRNA modification in the nucleus and cytosol	6	0	0.943	0.771348	35.2	95.2	97.9	20.63	13.1	1.82221e+08	1.10574e+08	126369132	1.56836e+08	1.23318e+08	1.22619e+08	12	12	12	12	12	11	1
NP_919223.1	heterogeneous nuclear ribonucleoprotein A3 isoform a [OS=Homo sapiens]	0	291.394	54	23	262	5	378	39.6	9.01	651.59	23	Pf00076, Pf13893, Pf14259	220988	HNRNPA3	2	ENSG00000170144.20		Spliceosome	mRNA Splicing - Major Pathway	5	18	1.029	0.947399	33.99	106.4	101.2	3.89	7.6	3.95939e+08	359455619	4.06366e+08	3.32202e+08	3.79175e+08	3.50876e+08	23	23	23	22	23	23	1	Acetyl [N-Term]
NP_004102.1	Flap endonuclease 1 [OS=Homo sapiens]	0	160.84	54	15	71	15	380	42.6	8.62	198.92	15	Pf00752, Pf00867, Pf01367	2237	FEN1	11	ENSG00000168496.3		Base excision repair; Non-homologous end-joining; DNA replication	POLB-Dependent Long Patch Base Excision Repair; Early Phase of HIV Life Cycle; Removal of the Flap Intermediate; HDR through MMEJ (alt-NHEJ); PCNA-Dependent Long Patch Base Excision Repair; Removal of the Flap Intermediate from the C-strand	32	0	1.229	0.748192	28.94	106	89.3	9.63	1.96	9.19181e+07	9.50794e+07	1.0388e+08	8.23632e+07	8.39134e+07	8.21189e+07	13	15	13	14	14	14	1
BAG58843.1	unnamed protein product [OS=Homo sapiens]	0	235.772	54	19	233	7	305	33.6	8.46	604.13	19	Pf00056, Pf02866	3939	LDHA	11		Photodynamic therapy-induced HIF-1 survival signaling; Glycolysis and Gluconeogenesis			2	10	1.076	0.995561	29.16	103	99.1	8.72	5	1.21416e+09	8.90617e+08	1.08643e+09	1.09213e+09	9.74827e+08	9.85978e+08	16	16	15	16	16	16	1	Met-loss+Acetyl [N-Term]
NP_002892.1	reticulocalbin-1 precursor [OS=Homo sapiens]	0	173.674	54	13	112	13	331	38.9	5	326.31	13	Pf13499	5954	RCN1	11	ENSG00000049449.8			Post-translational protein phosphorylation; Regulation of Insulin-like Growth Factor (IGF) transport and uptake by Insulin-like Growth Factor Binding Proteins (IGFBPs)	4	0	0.828	0.364253	28.78	98.6	115.8	7.92	10.36	2.11918e+08	1.58403e+08	1.82493e+08	2.36223e+08	2.03685e+08	1.87679e+08	13	13	14	11	10	11	1
ABC40730.1	heat shock 90kDa protein 1, alpha [OS=Homo sapiens]	0	1019.92	54	62	1624	42	854	98.1	5.16	4002.33	62	Pf00183, Pf02518, Pf13589	3320	HSP90AA1	14		TNF alpha Signaling Pathway; Corticotropin-releasing hormone signaling pathway; Aryl Hydrocarbon Receptor; EBV LMP1 signaling; Constitutive Androstane Receptor Pathway; VEGFA-VEGFR2 Signaling Pathway			6	0	1.087	0.981982	27.54	108.2	99.3	1.72	4.47	2.25367e+09	1.90252e+09	2.09126e+09	1.7346e+09	1.84984e+09	1.81084e+09	43	43	42	38	39	43	1
NP_001295374.1	N-alpha-acetyltransferase 50 isoform 2 [OS=Homo sapiens]	0	51.553	54	8	57	8	168	19.3	8.81	104.12	8	Pf00583, Pf13420, Pf13508, Pf13527, Pf13673	80218	NAA50	3	ENSG00000121579.12	Metapathway biotransformation			1	0	1.123	0.935403	31.15	104.9	99.7	16.92	10.26	5.39926e+07	3.53904e+07	3.89103e+07	3.61336e+07	2.9365e+07	3.48846e+07	8	8	8	8	8	8	1
NP_039234.1	Chloride intracellular channel protein 4 [OS=Homo sapiens]	0	60.973	54	8	38	8	253	28.8	5.59	87.33	8	Pf00043, Pf13409, Pf13410, Pf13417, Pf14497	25932	CLIC4	1	ENSG00000169504.14				0	0	0.793	0.248098	29.22	76.1	101	32.81	10.78	3.42169e+07	5.16918e+07	6.49645e+07	8.41741e+07	6.73316e+07	7.03586e+07	7	7	7	6	6	7	1
AAD21815.1	HSP70-2 [OS=Homo sapiens]	0	344.852	54	33	301	6	641	70	5.66	790.93	33	Pf00012, Pf06723	3304	HSPA1B	6		Parkin-Ubiquitin Proteasomal System pathway			1	23	1.03	0.949533	25.26	103.5	97.3	9.11	7.53	2.56366e+08	2.62243e+08	2.87389e+08	2.32657e+08	2.64141e+08	2.52986e+08	28	28	28	29	29	28	1
AAA36368.1	neuroleukin [OS=Homo sapiens]	0	326.42	54	24	238	1	558	63.1	8.32	713.67	24	Pf00342	2821	GPI	19		Glycolysis and Gluconeogenesis			1	23	1.06	0.985514	27.22	100.6	95.7	11.79	4.35	8.21033e+08	5.88794e+08	6.3852e+08	6.3403e+08	574921314	5.74599e+08	24	23	22	22	22	22	1	Met-loss+Acetyl [N-Term]
AAF22645.1	sperm antigen-36 [OS=Homo sapiens]	0	352.473	54	24	239	1	558	63.1	8.32	721.5	24	Pf00342								0	0	0.029	1.62313e-16	80.47	7.3	250.6	69.95		188515	403450	116018			5.75701e+06	1	1	1			1	1	Met-loss+Acetyl [N-Term]
NP_003396.1	14-3-3 protein eta [OS=Homo sapiens]	0	111.074	54	15	89	11	246	28.2	4.84	171.4	15	Pf00244	7533	YWHAH	22	ENSG00000128245.14	Cell Cycle; Myometrial Relaxation and Contraction Pathways; Calcium Regulation in the Cardiac Cell; Sudden Infant Death Syndrome (SIDS) Susceptibility Pathways	Viral carcinogenesis; Cell cycle; Epstein-Barr virus infection; Oocyte meiosis; PI3K-Akt signaling pathway; Hippo signaling pathway	Translocation of GLUT4 to the plasma membrane; Chk1/Chk2(Cds1) mediated inactivation of Cyclin B:Cdk1 complex; TP53 Regulates Metabolic Genes; Activation of BAD and translocation to mitochondria ; RHO GTPases activate PKNs	32	0	0.986	0.866845	17.12	78.5	115.4	3.4	15.23	8.45692e+07	7.79688e+07	8.55547e+07	1.20867e+08	9.55515e+07	1.28873e+08	10	9	9	11	10	11	1	Met-loss+Acetyl [N-Term]
EAX07023.1	ribosomal protein S8, isoform CRA_a, partial [OS=Homo sapiens]	0	241.066	54	18	239	18	239	27.4	10.29	590.33	18	Pf01201	6202	RPS8	1		Cytoplasmic Ribosomal Proteins			1	0	0.963	0.812522	18.37	98.7	96.3	7.94	5.42	7.38908e+08	5.76853e+08	6.03561e+08	6.09595e+08	5.37597e+08	5.77203e+08	18	18	18	18	17	18	1
BAG70165.1	autoantigen La, partial [OS=Homo sapiens]	0	210.864	54	21	159	21	408	46.8	7.12	300.52	21	Pf00076, Pf05383, Pf08777, Pf14259	6741	SSB	2					0	0	0.973	0.834567	33.48	95.2	109.1	2.65	5.31	2.25882e+08	1.88441e+08	2.04856e+08	2.14572e+08	2.23205e+08	2.32168e+08	21	21	20	20	20	21	1	Met-loss+Acetyl [N-Term]
NP_001961.1	eukaryotic translation initiation factor 5A-1 isoform B [OS=Homo sapiens]	0	230.172	54	11	180	11	154	16.8	5.24	548.67	11	Pf01287	1984	EIF5A	17	ENSG00000132507.17	Translation Factors; eIF5A regulation in response to inhibition of the nuclear export system		Hypusine synthesis from eIF5A-lysine	6	0	1.008	0.907822	20.66	101.6	98.8	7.07	6.33	5.0234e+08	3.81209e+08	4.39575e+08	4.39293e+08	4.05918e+08	3.76447e+08	11	10	11	10	8	10	1	Met-loss+Acetyl [N-Term]
AAA03341.1	ribosomal protein L23a, partial [OS=Homo sapiens]	0	117.068	54	11	140	11	156	17.7	10.45	322.6	11	Pf00276, Pf03939	6147	RPL23A	17		Cytoplasmic Ribosomal Proteins			1	0	1.019	0.926286	45.88	85.7	115.1	9.25	3.49	2.05781e+08	1.60417e+08	1.62968e+08	2.40147e+08	2.20807e+08	2.211e+08	10	10	9	10	10	10	1
NP_002810.1	polypyrimidine tract-binding protein 1 isoform a [OS=Homo sapiens]	0	254.494	54	20	179	17	557	59.6	9.16	602.42	20	Pf00076, Pf13893, Pf14259	5725	PTBP1	19	ENSG00000011304.19	mir-124 predicted interactions with cell cycle and differentiation; mRNA Processing			2	3	1.034	0.955036	36.28	102.8	105.3	1.06	3.11	2.42477e+08	2.07305e+08	2.2726e+08	2.34324e+08	2.1595e+08	2.1946e+08	18	17	16	15	14	15	1	Acetyl [N-Term]
XP_005251033.1	PREDICTED: plectin isoform X3 [OS=Homo sapiens]	0	2241.02	54	242	1668	237	4689	532.1	5.97	4073.66	242	Pf00307, Pf00681, Pf03501, Pf07812	5339	PLEC	8					0	5	0.752	0.147228	29.91	87.4	115.5	2.07	11.28	2.63989e+09	2.2308e+09	2.41247e+09	3.66684e+09	2.91752e+09	3.02251e+09	217	219	218	222	217	219	1
NP_001158887.1	L-lactate dehydrogenase A chain isoform 4 [OS=Homo sapiens]	0	220.648	54	15	199	3	274	30	8	530.93	15	Pf00056, Pf02866	3939	LDHA	11	ENSG00000134333.13	Cori Cycle; Photodynamic therapy-induced HIF-1 survival signaling; Amino Acid metabolism; Glycolysis and Gluconeogenesis			4	0	1.191	0.814193	33.01	115	77.5	7.54	14.81	346109364	2.85399e+08	2.82633e+08	2.53442e+08	190087552	1.97329e+08	3	3	3	3	3	3	1	Met-loss+Acetyl [N-Term]
NP_002291.1	L-lactate dehydrogenase B chain isoform LDHB [OS=Homo sapiens]	0	169.193	54	19	191	16	334	36.6	6.05	391.45	19	Pf00056, Pf02866	3945	LDHB	12	ENSG00000111716.12	Glycolysis and Gluconeogenesis	Glycolysis / Gluconeogenesis; Propanoate metabolism; Cysteine and methionine metabolism; Glucagon signaling pathway; Metabolic pathways; Pyruvate metabolism	Pyruvate metabolism	11	3	1.074	0.996044	34.94	106.8	89.2	7.97	6.33	1.3835e+09	1.09181e+09	1.12449e+09	1.06822e+09	9.3682e+08	9.36308e+08	17	18	18	17	18	19	1
NP_004491.2	heterogeneous nuclear ribonucleoproteins C1/C2 isoform b [OS=Homo sapiens]	0	167.167	54	19	228	19	293	32.3	5.08	411.47	19	Pf00076, Pf13893, Pf14259	3183	HNRNPC	14	ENSG00000092199.17	mRNA Processing			1	0	1.088	0.98058	24.37	102.4	91.6	3.82	4.11	6.84183e+08	6.44788e+08	6.75781e+08	6.03477e+08	5.45109e+08	5.7039e+08	17	16	16	19	19	19	1	Met-loss+Acetyl [N-Term]
AAF62370.1	heterochromatin-like protein 1 [OS=Homo sapiens]	0	107.022	54	10	109	8	183	20.8	5.33	292.33	10	Pf00385, Pf01393	11335	CBX3	7		Exercise-induced Circadian Regulation			1	2	1.131	0.917359	24.78	95.5	96.1	8.29	13.43	1.40196e+08	1.258e+08	1.55046e+08	1.13054e+08	1.3074e+08	1.44232e+08	9	9	9	9	10	9	1
BAF82343.1	unnamed protein product [OS=Homo sapiens]	0	63.376	53	10	59	1	286	32.9	5.69	126.26	10	Pf01267	829	CAPZA1	1					0	0	0.872	0.730301	19.33	108.5	111.1	16.72	18.31	724942	458695	664697		736805	563693	1	1	1		1	1	1	Met-loss+Acetyl [N-Term]
Q9H3K6.1	RecName: Full=BolA-like protein 2 [OS=Homo sapiens]	0	53.935	53	4	26	4	86	10.1	6.52	66.58	4	Pf01722	654483; 552900; 107984053	BOLA2B; BOLA2; LOC107984053	16				Gene and protein expression by JAK-STAT signaling after Interleukin-12 stimulation; Interleukin-12 family signaling	5	0	0.891	0.598033	34.33	88.7	109	6.56	9.41	2.32107e+07	1.93392e+07	2.39182e+07	2.62677e+07	2.2704e+07	2.71916e+07	4	4	4	4	4	4	1	Acetyl [N-Term]
AAX82302.1	Actin-like protein, partial [OS=Homo sapiens]	0	111.151	53	3	187	1	103	11.5	6.52	589.96	3	Pf00022	71	ACTG1	17		Arrhythmogenic Right Ventricular Cardiomyopathy; Pathogenic Escherichia coli infection; Myometrial Relaxation and Contraction Pathways; Focal Adhesion; Fas Ligand (FasL) pathway and Stress induction of Heat Shock Proteins (HSP) regulation; Striated Muscle Contraction; Regulation of Actin Cytoskeleton			7	0	2.773	1.91581e-07	136.88	123.6	23.4	91.69	102.85	638420	23850606	15028925	787113	8887435	2.68658e+06	1	1	1	1	1	1	1
BAG60258.1	unnamed protein product [OS=Homo sapiens]	0	91.345	53	12	75	12	363	39.8	5.31	152.24	12	Pf00400	11171	STRAP	12	ENSG00000023734.10	TGF-beta Signaling Pathway			1	0	1.113	0.951643	26.78	105.3	93.5	8.7	2.88	1.12783e+08	9.02636e+07	89964841	8.44815e+07	8.01042e+07	8.42235e+07	12	12	11	11	11	12	1
NP_006635.2	heat shock protein 105 kDa isoform 1 [OS=Homo sapiens]	0	488.123	53	46	511	42	858	96.8	5.39	1383.41	46	Pf00012	10808	HSPH1	13	ENSG00000120694.19		Protein processing in endoplasmic reticulum	Scavenging by Class F Receptors; Regulation of HSF1-mediated heat shock response	8	4	1.056	0.98058	32.82	111.5	90.9	2.1	2.1	8.99102e+08	7.83922e+08	8.22511e+08	6.89502e+08	6.48047e+08	6.5545e+08	40	41	40	41	41	39	1	Met-loss+Acetyl [N-Term]
XP_005259352.1	PREDICTED: calpain small subunit 1 isoform X1 [OS=Homo sapiens]	0	112.341	53	10	67	10	322	33.8	6.23	204.2	10	Pf13499, Pf13833	826	CAPNS1	19	ENSG00000126247.10	Integrin-mediated Cell Adhesion			1	0	0.992	0.88306	31.89	96.9	106	17.02	7.92	1.1081e+08	7.50229e+07	7.74036e+07	9.54104e+07	8.00611e+07	8.41793e+07	8	9	8	10	7	7	1
AAL35904.1	protein phosphatase type 2A catalytic subunit [OS=Homo sapiens]	0	97.667	53	11	55	3	309	35.6	5.43	183.15	11	Pf00149	5516	PPP2CB	8		Serotonin Transporter Activity; Dopamine metabolism; Wnt Signaling Pathway and Pluripotency; Exercise-induced Circadian Regulation; Glycogen Metabolism; Monoamine Transport			6	0	1.366	0.409636	46.27	112.4	91.9	16.8	17.34	1.07163e+07	7568993	1.15746e+07	5.86835e+06	7.91626e+06	7.84845e+06	3	3	3	2	2	3	1
ABD77165.1	ribosomal protein L18, partial [OS=Homo sapiens]	0	127.394	53	13	104	2	164	18.7	11.81	267.64	13	Pf00828	6141	RPL18	19		Cytoplasmic Ribosomal Proteins			1	11	1.029	0.946063	42.07	101	100.4	9.31	3.66	3.19415e+08	2.58521e+08	2.51576e+08	2.85252e+08	2.65651e+08	2.58658e+08	13	12	12	11	11	11	1
EAW74048.1	glucosidase, alpha; neutral AB, isoform CRA_d [OS=Homo sapiens]	0	210.293	53	27	168	1	749	85.1	6.34	404.3	27	Pf01055, Pf13802	23193	GANAB	11					0	0	3.063	0.000402712	96.99	128	31.8	62.85	86.01	792335	3.46094e+06	2.86048e+06	238145	1.68246e+06	669906	1	1	1	1	1	1	1
AAC39751.1	Cargo selection protein TIP47 [OS=Homo sapiens]	0	136.348	53	14	64	14	434	47	5.44	188.11	14	Pf03036	10226	PLIN3	19					0	0	1.116	0.946499	34.18	102.8	102.4	19.97	17.02	2.86856e+07	3.38514e+07	4.08214e+07	2.6834e+07	3.67127e+07	3.45727e+07	9	10	11	11	11	12	1
NP_001120665.1	cellular nucleic acid-binding protein isoform 2 [OS=Homo sapiens]	0	136.631	53	10	66	2	178	19.6	7.58	158.46	10	Pf00098	7555	CNBP	3	ENSG00000169714.16				0	8	1.238	0.725422	74.94	100.4	94	5.5	6.82	1.75488e+08	1.67888e+08	1.65866e+08	1.51374e+08	1.52606e+08	1.32771e+08	8	9	8	9	9	9	1
BAB55174.1	unnamed protein product [OS=Homo sapiens]	0	153.486	53	14	88	1	396	44.7	7.81	214.95	14	Pf01926, Pf02421, Pf06071	29789	OLA1	2					0	0	0.01	1.62313e-16			300								2190420						1	1
BAA06338.1	glycyl tRNA synthetase [OS=Homo sapiens]	0	256.178	53	28	168	1	739	83.1	7.03	387.91	28	Pf00458, Pf00587, Pf03129	2617	GARS	7					0	24	0.686	0.0471281	52.23	80	117.5	19.28	16.37	1.84711e+08	1.14664e+08	1.30697e+08	2.23846e+08	1.58688e+08	1.81064e+08	22	19	22	17	19	23	1
NP_001274271.1	14 kDa phosphohistidine phosphatase isoform 4 [OS=Homo sapiens]	0	41.541	53	4	33	4	127	14	5.77	85.55	4	Pf05005	29085	PHPT1	9					0	0	1.141	0.905161	32.91	106.8	87.2	6.82	2.95	3.88339e+07	35417554	3.36436e+07	2.8597e+07	28618432	2.94805e+07	4	3	4	3	3	4	1	Met-loss+Acetyl [N-Term]
NP_940848.2	Uncharacterized protein C1orf122 isoform 1 [OS=Homo sapiens]	0	16.169	53	3	10	3	110	11.5	6.73	31.9	3		127687	C1orf122	1	ENSG00000197982.13				0	0	1.563	0.156978	27.8	127.8	73	9.28	24.46	6.5044e+06	5.02506e+06	5.16364e+06	4.44301e+06	2.96668e+06	2.84748e+06	2	2	2	1	1	1	1
AAH16765.1	PDZ and LIM domain 4 [OS=Homo sapiens]	0	128.759	53	14	81	14	330	35.3	7.71	142.76	14	Pf00412, Pf00595	8572	PDLIM4	5					0	0	0.755	0.152549	23.14	92.2	110.3	5.97	4.66	1.02801e+08	8.01839e+07	8.95409e+07	1.04763e+08	9.42516e+07	1.01112e+08	13	13	13	13	13	13	1
NP_002884.1	histone-binding protein RBBP7 isoform 2 [OS=Homo sapiens]	0	130.856	53	12	96	10	425	47.8	5.05	191.69	12	Pf00400, Pf12265	5931	RBBP7	X	ENSG00000102054.17	Retinoblastoma (RB) in Cancer; Interactome of polycomb repressive complex 2 (PRC2)		RMTs methylate histone arginines; Regulation of TP53 Activity through Acetylation; PKMTs methylate histone lysines; Activation of anterior HOX genes in hindbrain development during early embryogenesis; HATs acetylate histones; Neddylation; Deposition of new CENPA-containing nucleosomes at the centromere; ERCC6 (CSB) and EHMT2 (G9a) positively regulate rRNA expression; Regulation of PTEN gene tran…	41	0	1.064	0.988452	42.86	152.2	34.1	5.06	76.89	4.28205e+08	3.67269e+08	3.69245e+08	7.32163e+07	8.51453e+07	2.63741e+08	9	9	9	9	9	9	1	Met-loss+Acetyl [N-Term]
AAA36460.1	purine nucleoside phosphorylase [OS=Homo sapiens]	0	75.115	53	8	49	1	289	32.2	7.53	195.13	8	Pf01048	4860	PNP	14					0	0	0.766	0.542225	550.59	87.3	88.8	139.38	50.43	3.06743e+06	19441.9		244769	196347	479609	1	1		1	1	1	1	Acetyl [N-Term]
NP_003409.1	cellular nucleic acid-binding protein isoform 3 [OS=Homo sapiens]	0	138.765	53	9	71	1	177	19.5	7.71	172.04	9	Pf00098	7555	CNBP	3	ENSG00000169714.16				0	0	0.341	4.22517e-06	53.91	44.4	130.1	24.01	46.44	807658	1.11768e+06	1.19996e+06	1.65517e+06	3.33975e+06	4520658	1	1	1	1	1	1	1
NP_001317176.1	heterogeneous nuclear ribonucleoprotein A3 isoform b [OS=Homo sapiens]	0	236.925	53	20	211	2	356	37	8.31	499.35	20	Pf00076, Pf13893, Pf14259	220988	HNRNPA3	2	ENSG00000170144.20				0	0	1.509	0.163718	38.25	121.7	71.8	10.12	16.38	3.32971e+07	3.3306e+07	3.86954e+07	2.0727e+07	1.84072e+07	2.49902e+07	2	2	2	2	2	2	1	Acetyl [N-Term]
EAW86999.1	Ribosomal protein L7, isoform CRA_a [OS=Homo sapiens]	0	163.123	53	16	200	16	259	30.4	10.71	349.74	16	Pf00327, Pf08079	6129	RPL7	8		Cytoplasmic Ribosomal Proteins			1	0	1.193	0.810822	29.45	109.4	92.5	3	1.55	7.25221e+08	6.42946e+08	6.5968e+08	5.71621e+08	5.43181e+08	5.48903e+08	16	16	16	16	15	16	1
XP_005257069.1	PREDICTED: clathrin heavy chain 1 isoform X1 [OS=Homo sapiens]	0	897.337	52	78	643	78	1682	192.3	5.69	1804.63	78	Pf00637, Pf01394, Pf04053, Pf09268, Pf13838	1213	CLTC	17		VEGFA-VEGFR2 Signaling Pathway; Complement and Coagulation Cascades			2	0	1.027	0.941295	31	104.4	99.4	1.53	1.65	1.29459e+09	1.16525e+09	1.24589e+09	1.13451e+09	1.14899e+09	1.11865e+09	70	69	70	67	69	71	1	Met-loss+Acetyl [N-Term]
AAB37341.1	nuclear corepressor KAP-1 [OS=Homo sapiens]	0	426.432	52	29	316	29	835	88.5	5.77	913.81	29	Pf00628, Pf00643	10155	TRIM28	19		Corticotropin-releasing hormone signaling pathway			1	0	0.95	0.787659	33.62	95.4	106.2	1.54	2.5	4.01361e+08	3.40381e+08	3.72392e+08	3.86073e+08	3.96311e+08	3.90988e+08	26	26	27	27	27	27	1	Met-loss+Acetyl [N-Term]
NP_001950.1	Elongation factor 1-beta [OS=Homo sapiens]	0	100.108	52	10	108	9	225	24.7	4.67	414.95	10	Pf00736, Pf14497	1933	EEF1B2	2; CHR_HSCHR2_6_CTG7_2	ENSG00000283391.1; ENSG00000114942.13	Translation Factors		Eukaryotic Translation Elongation	4	0	1.263	0.667529	48.25	105	90.6	6.89	12.39	2.32827e+08	1.79049e+08	2.18724e+08	2.16183e+08	1.79383e+08	1.66047e+08	9	8	8	9	8	9	1	Met-loss [N-Term]
AAF99680.1	DNA-binding protein TAXREB107 [OS=Homo sapiens]	0	178.122	52	16	162	16	289	32.9	10.58	329.11	16	Pf01159, Pf03868	6128	RPL6	12		Cytoplasmic Ribosomal Proteins			1	0	1.158	0.88306	27.4	111.4	90.8	10.01	9.22	6.24972e+08	5.62351e+08	5.04923e+08	5.45383e+08	4.59258e+08	4.52237e+08	15	14	15	15	14	15	1	Met-loss [N-Term]
AAD19900.1	putative translation initiation factor A121/Sui1 [OS=Homo sapiens]	0	46.418	52	4	39	4	113	12.7	7.44	96.6	4	Pf01253	10209	EIF1	17		Translation Factors			1	0	1.219	0.768555	23.91	105	85.7	6.64	18.81	4.56085e+07	4.33337e+07	4.94299e+07	4.83829e+07	3.65499e+07	3.31464e+07	3	4	4	4	4	4	1
AAC80170.1	alpha SNAP [OS=Homo sapiens]	0	89.427	52	10	58	10	295	33.2	5.36	135.21	10	Pf14938	8775	NAPA	19					0	0	1.182	0.832434	29.11	105.5	90.3	1.26	13.61	3.41968e+07	2.92666e+07	3.17211e+07	2.6422e+07	2.80215e+07	2.11844e+07	9	9	9	9	9	7	1	Acetyl [N-Term]
AAB01041.1	ribosomal protein L9 [OS=Homo sapiens]	0	93.726	52	8	105	4	192	21.9	9.95	346.99	8	Pf00347	6133	RPL9	4		Cytoplasmic Ribosomal Proteins			1	4	1.071	0.999203	9.61	104.1	96.2	9.09	2.02	1.44779e+08	1.47423e+08	1.62737e+08	1.47707e+08	1.40767e+08	1.38179e+08	7	7	7	6	6	7	1
NP_938149.2	neutral alpha-glucosidase AB isoform 3 precursor [OS=Homo sapiens]	0	330.937	52	34	262	1	966	109.4	6.24	699.66	34	Pf01055, Pf13802	23193	GANAB	11	ENSG00000089597.16				0	1	2.124	0.0118007	19.76	255.1	20.9	17.07	109.59	5739327	3.56737e+06	5.07354e+06	403712	310597	2.15815e+06	2	2	2	1	1	2	1
NP_001306086.1	dynein light chain roadblock-type 1 isoform d [OS=Homo sapiens]	0	44.015	52	5	46	2	121	13.4	10.08	117.03	5	Pf03259	83658	DYNLRB1	20					0	3	1.157	0.884527	16.67	106.3	93.4	1.3	6.65	4.0665e+07	3.64054e+07	3.88837e+07	2.98865e+07	3.32661e+07	3.22416e+07	5	5	5	5	5	5	1	Met-loss+Acetyl [N-Term]
CAA46472.1	hnRNP U protein [OS=Homo sapiens]	0	493.398	52	42	392	42	806	88.9	5.78	1016.71	42	Pf00622, Pf13671	3192	HNRNPU	1		mRNA Processing			1	0	0.992	0.88306	29.86	94	100.5	1.88	2.9	8.95455e+08	7.88619e+08	8.8131e+08	8.89355e+08	8.52003e+08	8.9579e+08	36	37	38	35	36	38	1
ABC40673.1	rcTPM3, partial [OS=Homo sapiens]	0	175.342	52	13	129	1	247	28.8	4.79	312.81	13	Pf00261								0	0	1.125	0.931092	6.77	108.9	96.7	0.61	8.74	33642384	29046540	31901608	24239062	28222072	26735436	1	1	1	1	1	1	1	Acetyl [N-Term]
AAD44500.1	Homologous yeast-44.2 protein [OS=Homo sapiens]	0	140.307	52	14	92	1	396	44.7	7.81	212.66	14	Pf01926, Pf02421, Pf06071	29789	OLA1	2					0	13	1.167	0.862287	23.7	106	97.6	10.43	8.78	2.14028e+08	1.58119e+08	1.69117e+08	1.72137e+08	1.50396e+08	1.41303e+08	13	13	13	13	13	13	1
BAD96367.1	ribosomal protein L18a variant, partial [OS=Homo sapiens]	0	82.34	52	12	74	1	176	20.7	10.71	134.07	12	Pf01775	6142	RPL18A	19		Cytoplasmic Ribosomal Proteins			1	0	2.143	0.0115788	15.37	130.8	61	22.65		5538834	3541998	3452759	1.74244e+06			1	1	1	1			1
BAG56942.1	unnamed protein product [OS=Homo sapiens]	0	279.174	52	25	236	25	631	68.7	7.66	680.71	25	Pf00456, Pf00676, Pf02779, Pf02780	7086	TKT	3		Pentose Phosphate Pathway			1	0	0.975	0.837911	33.27	107.8	91.6	7.03	3.75	5.0659e+08	5.03096e+08	5.41942e+08	4.33516e+08	4.5763e+08	4.34372e+08	21	21	21	23	24	24	1	Acetyl [N-Term]
EAW58394.1	stomatin (EPB72)-like 2, isoform CRA_a [OS=Homo sapiens]	0	159.066	52	11	104	11	370	40	7.93	381.9	11	Pf01145	30968	STOML2	9					0	0	0.978	0.845009	15.79	95.7	95.4	5.04	4.78	5.62854e+07	5.24452e+07	5.16909e+07	4.82344e+07	5.06378e+07	5.14995e+07	8	8	9	7	7	8	1
NP_955392.1	tumor protein D54 isoform a [OS=Homo sapiens]	0	96.976	52	10	51	10	229	24.8	6.42	156.09	10	Pf04201	7165	TPD52L2	20	ENSG00000101150.17				0	0	0.989	0.873578	15.75	98.9	102.9	4.81	3.55	6.4231e+07	5.69057e+07	5.65142e+07	6.15049e+07	5.70386e+07	6.0552e+07	7	7	7	9	8	8	1	Acetyl [N-Term]
EAW95181.1	ARP3 actin-related protein 3 homolog (yeast), isoform CRA_b [OS=Homo sapiens]	0	88.363	51	7	69	4	171	19.5	6.02	240.93	7	Pf00022	10096	ACTR3	2					0	0	1.175	0.844928	15.19	108.8	92.9	2.42	14.27	1.4827e+07	13357733	1.38546e+07	9.37572e+06	1.14221e+07	1.21034e+07	3	3	3	3	3	3	1	Met-loss+Acetyl [N-Term]
NP_001032726.1	transcription factor BTF3 isoform A [OS=Homo sapiens]	0	89.333	51	7	52	7	206	22.2	9.38	187.26	7	Pf01849	689	BTF3	5	ENSG00000145741.15				0	0	1.157	0.883792	44.01	111.1	94.1	5.08	11.02	3.46632e+07	3.25987e+07	3.22152e+07	3.10639e+07	2.64799e+07	2.43976e+07	6	6	5	5	5	7	1
NP_665906.1	high mobility group protein HMG-I/HMG-Y isoform a [OS=Homo sapiens]	0	83.85	51	5	63	2	107	11.7	10.32	162.69	5		3159	HMGA1	6	ENSG00000137309.19	Adipogenesis; Preimplantation Embryo; Senescence and Autophagy in Cancer		2-LTR circle formation; APOBEC3G mediated resistance to HIV-1 infection; Integration of viral DNA into host genomic DNA; Vpr-mediated nuclear import of PICs; Autointegration results in viral DNA circles; Formation of Senescence-Associated Heterochromatin Foci (SAHF)	21	3	0.857	0.465943	65.72	93.8	109.6	17.94	9.65	1.56867e+08	9.51008e+07	1.30795e+08	1.69484e+08	1.45263e+08	1.37291e+08	5	5	5	5	5	5	1
NP_001275907.1	X-ray repair cross-complementing protein 6 isoform 3 [OS=Homo sapiens]	0	332.597	51	30	257	2	559	64.2	9.28	583.53	30	Pf02037, Pf02735, Pf03730, Pf03731	2547	XRCC6	22	ENSG00000196419.12	Non-homologous end joining			1	27	0.971	0.829551	24.24	98.6	101.7	2.14	2.25	4.85153e+08	4.41874e+08	4.73452e+08	4.73395e+08	4.73688e+08	4.49482e+08	26	27	26	28	28	28	1
NP_004246.2	Cytochrome c oxidase subunit 5A, mitochondrial precursor [OS=Homo sapiens]	0	51.651	51	4	34	4	150	16.8	6.79	106.42	4	Pf02284	9377	COX5A	15	ENSG00000178741.11	Electron Transport Chain; Arachidonate Epoxygenase / Epoxide Hydrolase	Parkinson's disease; Oxidative phosphorylation; Cardiac muscle contraction; Non-alcoholic fatty liver disease (NAFLD); Alzheimer's disease; Huntington's disease; Metabolic pathways	TP53 Regulates Metabolic Genes; Respiratory electron transport	18	0	1.372	0.396594	35.43	104.3	95.5	18.51	18.27	5.49498e+07	3.34292e+07	4.17626e+07	2.69871e+07	3.63446e+07	3.73406e+07	4	4	4	4	4	4	1
EAW73904.1	PRP19/PSO4 pre-mRNA processing factor 19 homolog (S. cerevisiae), isoform CRA_a [OS=Homo sapiens]	0	130.408	51	13	96	13	419	45.7	7.06	224.45	13	Pf00400, Pf08606	27339	PRPF19	11					0	0	1.035	0.955858	21.47	104.1	94.6	4.55	1.66	1.2563e+08	1.03338e+08	1.22993e+08	1.07778e+08	1.02379e+08	1.02243e+08	11	10	10	10	11	10	1
NP_001264069.1	actin-related protein 3 isoform 2 [OS=Homo sapiens]	0	126.886	51	12	92	9	367	42	5.62	289.24	12	Pf00022	10096	ACTR3	2	ENSG00000115091.11	Association Between Physico-Chemical Features and Toxicity Associated Pathways			1	3	1.103	0.967226	27.42	107.9	94.1	5.45	2.8	86408108	7.866e+07	9.13602e+07	7.23534e+07	7.23265e+07	6.79158e+07	11	11	12	11	12	12	1
NP_005508.1	Non-histone chromosomal protein HMG-17 [OS=Homo sapiens]	0	131.5	51	6	81	6	90	9.4	9.99	321.86	6		3151	HMGN2	1	ENSG00000198830.10				0	0	1.096	0.970674	131.54	93.4	142.3	7.45	20.49	9.38338e+07	9.28523e+07	1.0224e+08	1.22842e+08	1.81336e+08	1.45053e+08	5	5	5	6	6	5	1
EAW60005.1	hCG2010544 [OS=Homo sapiens]	0	98.449	51	5	51	2	135	15.6	9.61	216.44	5	Pf00833	402057	RPS17P16	22					0	4	1.129	0.922527	63.15	125.6	85.1	8.29	12.05	5.50893e+07	4.53031e+07	4.43229e+07	3.23755e+07	3.15411e+07	3.84475e+07	5	5	5	6	5	5	1
NP_006861.1	destrin isoform a [OS=Homo sapiens]	0	126.016	51	11	119	8	165	18.5	7.85	232.42	11	Pf00241	11034	DSTN	20	ENSG00000125868.15	Androgen receptor signaling pathway			1	0	1.078	0.990976	43.75	112.4	89.2	6.25	8.52	2.28898e+08	1.81136e+08	1.94077e+08	1.65603e+08	1.48481e+08	1.35892e+08	8	8	8	8	8	8	1	Met-loss+Acetyl [N-Term]
NP_001180414.1	LIM and senescent cell antigen-like-containing domain protein 1 isoform a [OS=Homo sapiens]	0	118.443	51	14	76	14	387	44.4	8.02	112.85	14	Pf00412	3987	LIMS1	2	ENSG00000169756.16	Primary Focal Segmental Glomerulosclerosis FSGS			1	0	0.874	0.532538	23.45	85.4	93.7	7.45	1.48	5.11773e+07	5.17802e+07	5.3798e+07	5.71778e+07	5.75107e+07	5.56762e+07	10	9	10	11	10	9	1
AAH18190.1	metallothionein 1X [OS=Homo sapiens]	0	28.588	51	4	24	1	61	6	7.84	37.32	4		4501	MT1X	16		Zinc homeostasis; Oxidative Stress			2	0	0.65	0.245637	75.81	52.4	80.7	61.82		340090	1.02523e+06	544864			790529	1	1	1			1	1
AAB35211.1	ornithine aminotransferase, OAT [OS=Homo sapiens]	0	124.902	51	15	84	14	439	48.5	6.86	182.2	15	Pf00202								0	1	1.287	0.603271	34.76	105.3	78.1	6.74	34.94	6.99625e+07	6.45857e+07	7.59123e+07	2.57629e+07	51953453	4.90939e+07	14	13	14	11	11	13	1
CAA73150.1	unnamed protein product, partial [OS=Homo sapiens]	0	64.374	51	7	34	3	193	22.3	7.62	123.23	7	Pf01997	7247	TSN	2					0	4	1.089	0.97822	25.07	93.6	111.2	4.93	13.72	1.9098e+07	1.66693e+07	1.66248e+07	2.14831e+07	1.62183e+07	2.03281e+07	5	6	6	6	5	7	1
BAG58692.1	unnamed protein product [OS=Homo sapiens]	0	364.046	51	34	278	2	995	112.9	6.06	753.11	34	Pf01055, Pf04901, Pf13802								0	32	1.101	0.967812	34.81	103.6	100.5	8.69	10.86	3.52487e+08	2.59103e+08	3.02736e+08	2.38197e+08	2.87101e+08	2.77006e+08	32	32	33	32	32	31	1
AAA51681.1	S-adenosylhomocysteine hydrolase [OS=Homo sapiens]	0	242.285	51	26	196	25	432	47.7	6.47	457.27	26	Pf00670, Pf02254, Pf02826, Pf05221	191	AHCY	20		Folate Metabolism; Trans-sulfuration pathway; One Carbon Metabolism; Trans-sulfuration and one carbon metabolism			4	1	1.013	0.914439	26.72	97.6	100.9	2.33	3.38	643028059	5.40741e+08	6.14001e+08	6.45985e+08	5.99764e+08	5.91154e+08	25	23	25	26	26	26	1	Met-loss+Acetyl [N-Term]
NP_005711.1	Actin-related protein 2/3 complex subunit 1B [OS=Homo sapiens]	0	107.342	51	12	92	11	372	40.9	8.35	249.04	12	Pf00400	10095	ARPC1B	7	ENSG00000130429.12	Pathogenic Escherichia coli infection; Microglia Pathogen Phagocytosis Pathway	Fc gamma R-mediated phagocytosis; Salmonella infection; Shigellosis; Regulation of actin cytoskeleton; Endocytosis; Bacterial invasion of epithelial cells; Pathogenic Escherichia coli infection	Regulation of actin dynamics for phagocytic cup formation; EPHB-mediated forward signaling; RHO GTPases Activate WASPs and WAVEs	21	1	1.021	0.931092	32.66	103.1	106	6.82	19.74	1.13503e+08	1.08023e+08	1.0282e+08	7.45274e+07	1.05521e+08	1.04481e+08	12	11	11	11	11	12	1	Met-loss+Acetyl [N-Term]
AAH40844.1	Syncrip protein [OS=Homo sapiens]	0	141.999	50	16	135	1	410	46.2	8.88	228.71	16	Pf00076, Pf06682, Pf13893, Pf14259	10492	SYNCRIP	6					0	0	1.734	0.0444628	35.87	120.8	69.7	4.9	27.4	6052029	5415458	5353606	4344721	3.14933e+06	2.45257e+06	1	1	1	1	1	1	1
CAG33698.1	PPP2CA [OS=Homo sapiens]	0	92.797	50	11	53	3	309	35.5	5.54	161.99	11	Pf00149	5515	PPP2CA	5		TNF alpha Signaling Pathway; Brain-Derived Neurotrophic Factor (BDNF) signaling pathway; Dopamine metabolism; Wnt Signaling Pathway and Pluripotency; Glycogen Metabolism			5	6	1.211	0.786309	37.02	105.6	98	10.49	5.58	3.69001e+07	2.71385e+07	2.92088e+07	2.56244e+07	2.79887e+07	2.58192e+07	7	7	7	6	6	9	1
EAW86690.1	ubiquitin-conjugating enzyme E2 variant 2, isoform CRA_c [OS=Homo sapiens]	0	19.212	50	3	10	1	103	11.7	5.52	27.95	3		7336	UBE2V2	8					0	0	0.898	0.623741	9.36	88.6	98.7	9.49	2.02	8173885	8576311	8.25099e+06	8805304	8732162	8909165	1	1	1	1	1	1	1	Met-loss+Acetyl [N-Term]
CAA80599.1	hnRNP G protein [OS=Homo sapiens]	0	250.062	50	27	271	27	391	42.4	10.02	527.99	27	Pf00076, Pf08081, Pf13893, Pf14259	27316	RBMX	X		mRNA Processing			1	0	1.119	0.941295	38.97	113.9	81.1	3.84	6.84	4.88511e+08	4.13996e+08	4.2964e+08	3.24839e+08	2.77971e+08	3.02368e+08	24	26	27	25	25	27	1	Met-loss+Acetyl [N-Term]
AAB50217.1	protein disulfide isomerase-related protein 5, partial [OS=Homo sapiens]	0	190.02	50	15	141	15	421	46.2	5.08	427.42	15	Pf00085, Pf13098, Pf13848, Pf13899, Pf13905	10130	PDIA6	2		Photodynamic therapy-induced unfolded protein response			1	0	0.94	0.761302	30.78	86	122.8	5.83	23.41	1.98847e+08	1.61088e+08	1.68489e+08	1.82633e+08	2.37766e+08	2.86928e+08	13	14	13	14	14	15	1
P55145.3	RecName: Full=Mesencephalic astrocyte-derived neurotrophic factor; AltName: Full=Arginine-rich protein; AltName: Full=Protein ARMET; Flags: Precursor [OS=Homo sapiens]	0	41.725	50	6	31	6	182	20.7	8.69	52.9	6	Pf10208	7873	MANF	3				Platelet degranulation	4	0	1.031	0.95018	24.34	98.4	107.5	14.05	3.5	2.61324e+07	2.95109e+07	3.19434e+07	3.21142e+07	3.36641e+07	3.2912e+07	6	5	5	6	6	5	1
NP_001027454.1	thymopoietin isoform beta [OS=Homo sapiens]	0	137.284	50	17	90	7	454	50.6	9.38	219.75	17	Pf03020, Pf08198	7112	TMPO	12	ENSG00000120802.13			Depolymerisation of the Nuclear Lamina; Initiation of Nuclear Envelope Reformation; Clearance of Nuclear Envelope Membranes from Chromatin	11	9	1.073	0.99814	32.37	106.1	96.2	4.73	5.98	9.63877e+07	7.65931e+07	8.67316e+07	7.62201e+07	8.03833e+07	70944633	15	15	14	14	14	13	1	Met-loss [N-Term]
NP_057951.1	RNA-binding protein Raly isoform 1 [OS=Homo sapiens]	0	103.323	50	11	51	1	306	32.4	9.17	130.37	11	Pf00076, Pf13893, Pf14259	22913	RALY	20	ENSG00000125970.11				0	0	1.312	0.540254	15.14	111.3	84.8	0.99	13.1	6.58308e+06	5.79874e+06	6.37482e+06	5.46486e+06	4.14495e+06	4534577	1	1	1	1	1	1	1
NP_001653.1	ADP-ribosylation factor 5 [OS=Homo sapiens]	0	52.763	50	7	37	3	180	20.5	6.79	123.84	7	Pf00025, Pf00071, Pf00503, Pf01926, Pf04670, Pf08477, Pf09439	381	ARF5	7	ENSG00000004059.10		Endocytosis	COPI-dependent Golgi-to-ER retrograde traffic; COPI-mediated anterograde transport	12	0	1.544	0.131136	17.6	123.6	79.2	2.41	10.49	39632473	3.57944e+07	3.7166e+07	2.77898e+07	2.29142e+07	2.25635e+07	2	2	2	2	2	2	1
AAD12785.2	SUMO-1-activating enzyme E1 N subunit [OS=Homo sapiens]	0	66.66	50	11	62	2	346	38.3	5.22	122.54	11	Pf00899	10055	SAE1	19					0	9	1.171	0.851995	30.36	123.8	84.8	0.57	5.02	7.59439e+07	6.58408e+07	7.12997e+07	4.43088e+07	4.79214e+07	4.62435e+07	10	10	11	9	9	9	1
NP_001104026.1	Filamin-A isoform 2 [OS=Homo sapiens]	0	1243.92	50	97	927	2	2647	280.6	6.06	2494.75	97	Pf00307, Pf00630	2316	FLNA	X	ENSG00000196924.14	Androgen receptor signaling pathway; Prolactin Signaling Pathway; Focal Adhesion; Hypothesized Pathways in Pathogenesis of Cardiovascular Disease; MAPK Signaling Pathway; IL-4 Signaling Pathway	Salmonella infection; Focal adhesion; Proteoglycans in cancer; MAPK signaling pathway	Platelet degranulation ; RHO GTPases activate PAKs; Cell-extracellular matrix interactions; GP1b-IX-V activation signalling	22	0	1.343	0.459976	29.42	124.8	79.4	5.11	13.23	3.26719e+07	3.12456e+07	3.38966e+07	2.57526e+07	2.04819e+07	1.98477e+07	2	2	2	2	2	2	1
NP_001949.1	Elongation factor 1-alpha 2 [OS=Homo sapiens]	0	214.154	50	16	758	4	463	50.4	9.03	1998.64	16	Pf00009, Pf03143, Pf03144	1917	EEF1A2	20	ENSG00000101210.10	Translation Factors	Legionellosis; RNA transport	Eukaryotic Translation Elongation	6	0	0.969	0.825383	32.64	112.3	88	12.43	20.75	2.83107e+07	2.86841e+07	3.45324e+07	1.75398e+07	2.32135e+07	2.60561e+07	3	3	3	3	3	3	1
XP_016885266.1	PREDICTED: ubiquitin-like modifier-activating enzyme 1 isoform X1 [OS=Homo sapiens]	0	430.174	50	41	332	41	1109	123.1	5.85	990.3	41	Pf00899, Pf02134, Pf09358, Pf10585	7317	UBA1	X		Proteasome Degradation; Parkin-Ubiquitin Proteasomal System pathway; Parkinsons Disease Pathway			3	0	0.967	0.819358	31.15	100.2	102.2	5.73	5.24	5.59689e+08	4.39399e+08	4.87173e+08	5.22728e+08	4.65551e+08	4.68593e+08	37	38	36	38	36	40	1
XP_016876581.1	PREDICTED: peptidyl-prolyl cis-trans isomerase FKBP3 isoform X1 [OS=Homo sapiens]	0	86.108	50	9	45	9	229	26	9.69	88.65	9	Pf00254	2287	FKBP3	14					0	0	0.843	0.416259	26.43	88.4	116.5	12.16	8.88	4.64873e+07	3.38177e+07	3.5359e+07	4.69634e+07	4.74951e+07	3.97402e+07	6	5	7	8	7	5	1
NP_005817.1	Heterogeneous nuclear ribonucleoprotein R isoform 2 [OS=Homo sapiens]	0	161.767	50	22	161	14	633	70.9	8.13	273.53	22	Pf00076, Pf13893, Pf14259	10236	HNRNPR	1; CHR_HSCHR1_4_CTG3	ENSG00000282958.1; ENSG00000125944.18	mRNA Processing		mRNA Splicing - Major Pathway	5	0	1.03	0.94963	25.85	104.4	101.5	4.8	8.04	6.32486e+07	5.02514e+07	5.65272e+07	5.19087e+07	5.22249e+07	5.85489e+07	10	10	10	11	11	10	1	Met-loss+Acetyl [N-Term]
AAK74072.1	heat shock protein gp96 precursor, partial [OS=Homo sapiens]	0	360.072	50	38	322	1	782	90.1	4.82	771.23	38	Pf00183, Pf02518, Pf13589	7184	HSP90B1	12		Photodynamic therapy-induced unfolded protein response			1	0	0.324	0.00174141	67.62	59.2	178	6.25	61.71	9498.09	7332.55	8706	15893.2		39404.8	1	1	1	1		1	1
CAB82418.1	hypothetical protein, partial [OS=Homo sapiens]	0	307.053	50	34	347	24	630	73.9	6.87	672.94	34	Pf00373, Pf00769, Pf09379, Pf09380	7430	EZR	6		Pathogenic Escherichia coli infection; AGE/RAGE pathway; VEGFA-VEGFR2 Signaling Pathway; Regulation of Actin Cytoskeleton			4	1	0.823	0.346473	35.14	96.4	111.7	3.44	9.06	4.60151e+08	418493719	4.67964e+08	5.90917e+08	5.01191e+08	4.89423e+08	20	21	21	24	24	23	1
AAH63242.1	Fatty acid synthase [OS=Homo sapiens]	0	921.877	50	91	679	77	2511	273.2	6.43	1878.83	91	Pf00106, Pf00107, Pf00108, Pf00109, Pf00698, Pf00975, Pf02801, Pf08242, Pf08659, Pf13602, Pf14765	2194	FASN	17		SREBF and miR33 in cholesterol and lipid homeostasis; Liver X Receptor Pathway; Fatty Acid Biosynthesis			3	13	0.985	0.863332	30.97	95.1	95.7	4.77	4.02	1.05622e+09	8.50717e+08	9.23521e+08	9.53737e+08	8.84977e+08	8.58412e+08	80	77	80	83	83	85	1
BAD52436.1	Filamin a [OS=Homo sapiens]	0	1252.9	50	97	939	2	2620	278.1	6.06	2507.85	97	Pf00307, Pf00630	2316	FLNA	X	ENSG00000196924.14	Androgen receptor signaling pathway; Prolactin Signaling Pathway; Focal Adhesion; Hypothesized Pathways in Pathogenesis of Cardiovascular Disease; MAPK Signaling Pathway; IL-4 Signaling Pathway	Salmonella infection; MAPK signaling pathway; Focal adhesion; Proteoglycans in cancer		10	90	1.002	0.897705	28.04	109.4	99.4	5.96	4.71	2.59647e+09	2.05736e+09	2.21824e+09	2.11859e+09	1.93215e+09	1.88878e+09	88	89	89	89	90	89	1	Met-loss [N-Term]
XP_005250727.1	PREDICTED: protein BUD31 homolog isoform X1 [OS=Homo sapiens]	0	32.353	50	7	35	7	145	17.3	8.87	68.46	7	Pf01125	8896	BUD31	7					0	0	1.034	0.955036	26.05	99.6	93.2	3.12	5.85	2.23878e+07	1.88999e+07	2.18782e+07	1.92909e+07	1.94812e+07	1.72496e+07	6	6	6	6	6	6	1
EAW56893.1	ribosomal protein S16, isoform CRA_b [OS=Homo sapiens]	0	94.288	50	9	124	9	145	16.3	10.18	214.5	9	Pf00380	6217	RPS16	19		Cytoplasmic Ribosomal Proteins			1	0	1.108	0.958462	24.71	106.7	92.9	2.11	1.73	3.89552e+08	334908920	3.79742e+08	3.15581e+08	2.9895e+08	3.03542e+08	9	9	9	9	9	9	1	Met-loss [N-Term]
Q9Y237.1	RecName: Full=Peptidyl-prolyl cis-trans isomerase NIMA-interacting 4; AltName: Full=Parvulin-14; Short=Par14; Short=hPar14; AltName: Full=Parvulin-17; Short=Par17; Short=hPar17; AltName: Full=Peptidyl-prolyl cis-trans isomerase Pin4; Short=PPIase Pin4; AltName: Full=Peptidyl-prolyl cis/trans isomerase EPVH; Short=hEPVH; AltName: Full=Rotamase Pin4 [OS=Homo sapiens]	0	33.781	50	4	11	4	131	13.8	9.77	33.97	4	Pf00639, Pf13145, Pf13616	5303	PIN4	X					0	0	1.316	0.530325	21.02	117.7	76.6	4.12	16.77	2.74225e+07	2.59892e+07	27379704	1.72658e+07	19402306	1.3707e+07	4	3	3	3	3	3	1
AAA85658.1	ribosomal protein S5 [OS=Homo sapiens]	0	120.67	50	12	89	12	204	22.8	9.55	282.94	12	Pf00177	6193	RPS5	19		Cytoplasmic Ribosomal Proteins			1	0	0.979	0.847695	44.99	80.7	138.5	4.74	25.94	1.50394e+08	1.19785e+08	1.39666e+08	1.51225e+08	2.27786e+08	2.50167e+08	10	10	10	11	12	12	1	Met-loss+Acetyl [N-Term]; Acetyl [N-Term]
BAG65428.1	unnamed protein product [OS=Homo sapiens]	0	270.756	49	27	242	1	586	63.9	5.55	620.13	27	Pf00012, Pf06723	3303	HSPA1A	6		Apoptosis Modulation and Signaling; Parkin-Ubiquitin Proteasomal System pathway; MAPK Signaling Pathway; Apoptosis Modulation by HSP70; VEGFA-VEGFR2 Signaling Pathway			5	0																				1
NP_001410.2	ELAV-like protein 1 [OS=Homo sapiens]	0	118.089	49	12	104	12	326	36.1	9.17	283.42	12	Pf00076, Pf13893, Pf14259	1994	ELAVL1	19	ENSG00000066044.14	AMP-activated Protein Kinase (AMPK) Signaling; Endoderm Differentiation; Preimplantation Embryo; Focal Adhesion-PI3K-Akt-mTOR-signaling pathway	AMPK signaling pathway	HuR (ELAVL1) binds and stabilizes mRNA; mRNA Splicing - Major Pathway	11	0	1.078	0.991189	20.77	119.9	93	13.28	3.6	1.20449e+08	1.08893e+08	9.1756e+07	8.60083e+07	8.92819e+07	8.30244e+07	12	12	10	11	11	11	1	Met-loss+Acetyl [N-Term]
ALQ33506.1	electron-transfer-flavoprotein alpha polypeptide isoform 3, partial [OS=Homo sapiens]	0	88.064	49	12	59	1	310	32.6	8.4	160.2	12	Pf00766, Pf01012	2108	ETFA	15					0	11	1.285	0.608409	32.6	117.6	88.3	14.04	10.18	4.85872e+07	3.93807e+07	3.48596e+07	2.6115e+07	3.05808e+07	3.05967e+07	10	11	10	10	9	10	1
BAG63519.1	unnamed protein product [OS=Homo sapiens]	0	192.263	49	20	127	1	594	65.9	7.3	317.29	20	Pf00117, Pf00665, Pf00733, Pf00958, Pf01171, Pf02540, Pf03054, Pf06508, Pf07722	8833	GMPS	3					0	0																				1
AAH19315.1	N-acetylneuraminic acid synthase [OS=Homo sapiens]	0	121.608	49	11	92	11	359	40.3	6.74	238.42	11	Pf03102, Pf08666	54187	NANS	9					0	0	0.993	0.883937	22.53	99	97	2.26	9.91	9.834e+07	8.22278e+07	9.03869e+07	9.98844e+07	8.1732e+07	8.35469e+07	11	11	11	11	11	11	1	Met-loss [N-Term]
NP_004640.4	ES1 protein homolog, mitochondrial isoform 1 precursor [OS=Homo sapiens]	0	74.738	49	8	43	8	268	28.2	8.27	116.39	8	Pf01965	8209; 102724023	C21orf33; LOC102724023	21	ENSG00000160221.16	Gastric Cancer Network 1			1	0	1.302	0.566547	41.52	112.5	88.7	27.28	6.1	4.17869e+07	2.13637e+07	2.89239e+07	2.01461e+07	2.2208e+07	2.15001e+07	5	5	5	5	5	6	1
EAW61507.1	arginyl-tRNA synthetase [OS=Homo sapiens]	0	164.897	49	24	119	24	660	75.3	6.68	249.34	24	Pf00750, Pf03485, Pf05746	5917	RARS	5					0	0	0.996	0.890905	32.62	98.3	96.8	9.05	8.28	1.11924e+08	8.85921e+07	88732247	1.04263e+08	9.01243e+07	8.71239e+07	18	19	19	20	20	20	1	Acetyl [N-Term]
NP_006443.1	Multifunctional protein ADE2 isoform 2 [OS=Homo sapiens]	0	167.544	49	20	131	20	425	47	7.23	373.44	20	Pf00731, Pf01259	10606	PAICS	4	ENSG00000128050.8		Metabolic pathways; Purine metabolism	Purine ribonucleoside monophosphate biosynthesis	6	0	1.035	0.955858	25.6	97.9	99.2	7.53	3.31	1.74502e+08	1.34281e+08	1.45573e+08	1.4338e+08	1.34455e+08	1.42453e+08	18	17	17	17	16	17	1	Met-loss+Acetyl [N-Term]
XP_005247645.1	PREDICTED: protein CDV3 homolog isoform X1 [OS=Homo sapiens]	0	64.445	49	5	33	5	259	27.5	6.4	98.81	5	Pf15359	55573	CDV3	3					0	0	1.036	0.957251	24.7	99.4	102.9	8.98	6.91	2.36539e+07	1.84159e+07	1.88588e+07	2.00869e+07	1.80426e+07	2.05572e+07	5	5	5	5	5	5	1
AAD47084.1	Prefoldin subunit 2 [OS=Homo sapiens]	0	80.071	49	6	47	6	155	17.1	8.43	113.71	6	Pf01920	5202	PFDN2	1					0	0	1.05	0.972049	25.08	118.3	63.5	5.85	30.14	5.76754e+07	5.59296e+07	6.05866e+07	3.15347e+07	2.92947e+07	4.87021e+07	5	5	6	6	5	6	1
NP_001406.1	eukaryotic translation initiation factor 2 subunit 3 [OS=Homo sapiens]	0	178.267	49	19	161	8	472	51.1	8.4	389.89	19	Pf00009, Pf03144, Pf09173	1968	EIF2S3	X	ENSG00000130741.10	Translation Factors	RNA transport	Formation of the ternary complex, and subsequently, the 43S complex; L13a-mediated translational silencing of Ceruloplasmin expression; ABC-family proteins mediated transport; Translation initiation complex formation; GTP hydrolysis and joining of the 60S ribosomal subunit; Recycling of eIF2:GDP; Ribosomal scanning and start codon recognition	15	11	0.982	0.853073	22.33	97.9	98.9	7.5	11.23	3.41938e+08	2.65545e+08	2.83427e+08	3.29373e+08	2.77061e+08	2.58704e+08	20	18	20	19	20	19	1	Met-loss [N-Term]; Met-loss+Acetyl [N-Term]
CAG33023.1	RPN1 [OS=Homo sapiens]	0	205.816	49	23	158	23	607	68.6	6.38	397	23	Pf04597	6184	RPN1	3		Proteasome Degradation			1	0	0.963	0.811837	36.05	98	98.3	5.82	10.46	1.89473e+08	1.52997e+08	1.60771e+08	1.34458e+08	1.59277e+08	1.57402e+08	20	21	21	20	22	21	1
AAP35656.1	ubiquitin-conjugating enzyme E2I (UBC9 homolog, yeast) [OS=Homo sapiens]	0	44.623	49	6	42	6	184	20.4	8.46	111.61	6	Pf00179, Pf14461	7329	UBE2I	16		Androgen receptor signaling pathway; TGF-beta Signaling Pathway			2	0	1.016	0.917292	51.25	106.8	99.7	17.28	7.1	3.75928e+07	2.32197e+07	2.98733e+07	2.63296e+07	2.64822e+07	2.92268e+07	5	5	5	5	5	5	1
NP_001894.2	catenin alpha-1 isoform 1 [OS=Homo sapiens]	0	273.677	49	34	188	34	906	100	6.29	429.23	34	Pf01044	1495	CTNNA1	5	ENSG00000044115.20	Arrhythmogenic Right Ventricular Cardiomyopathy; Apoptosis-related network due to altered Notch3 in ovarian cancer; VEGFA-VEGFR2 Signaling Pathway; White fat cell differentiation	Arrhythmogenic right ventricular cardiomyopathy (ARVC); Bacterial invasion of epithelial cells; Hippo signaling pathway; Adherens junction; Endometrial cancer; Tight junction; Leukocyte transendothelial migration; Pathways in cancer	Adherens junctions interactions; CDO in myogenesis; VEGFR2 mediated vascular permeability; RHO GTPases activate IQGAPs	27	0	1.105	0.966527	32.29	107.7	97	2.47	2.47	2.20842e+08	202563448	2.15103e+08	1.92823e+08	1.79868e+08	1.82834e+08	30	32	32	29	28	31	1	Met-loss+Acetyl [N-Term]
CAG38493.1	RAB1B [OS=Homo sapiens]	0	78.262	49	8	55	3	201	22.2	5.73	161.73	8	Pf00025, Pf00071, Pf01926, Pf04670, Pf08477, Pf09439	81876	RAB1B	11					0	0	1.484	0.197138	44.88	125.8	61.8	3.21	47.09	6.5148e+07	5.94756e+07	6.58575e+07	1.61077e+07	4.40415e+07	2.99624e+07	3	3	3	3	3	3	1
EAW70563.1	X-ray repair complementing defective repair in Chinese hamster cells 5 (double-strand-break rejoining; Ku autoantigen, 80kDa), isoform CRA_b [OS=Homo sapiens]	0	336.516	49	34	241	34	827	93.5	8.1	583.53	34	Pf02735, Pf03730, Pf03731, Pf08785	7520	XRCC5	2					0	0	0.976	0.83995	26.53	87.3	103.5	5.84	7.74	6.14911e+08	5.68154e+08	6.56141e+08	6.67234e+08	6.95517e+08	7.56294e+08	26	28	29	30	29	30	1
EAW76289.1	RNA binding protein, autoantigenic (hnRNP-associated with lethal yellow homolog (mouse)), isoform CRA_c [OS=Homo sapiens]	0	115.992	49	12	52	2	317	33.7	9.45	133.2	12	Pf00076, Pf13893, Pf14259	22913	RALY	20					0	10	1.137	0.91118	25.82	92	105.6	9.55	6.06	1.52407e+08	1.13781e+08	1.22604e+08	1.50289e+08	1.34891e+08	1.30427e+08	9	10	10	11	10	11	1
NP_005907.3	DNA replication licensing factor MCM7 isoform 1 [OS=Homo sapiens]	0	249.595	49	28	193	28	719	81.3	6.46	491.66	28	Pf00493, Pf07728, Pf14551	4176	MCM7	7	ENSG00000166508.17	miRNA Regulation of DNA Damage Response; Cell Cycle; Retinoblastoma (RB) in Cancer; G1 to S cell cycle control; DNA Replication	DNA replication; Cell cycle	M/G1 Transition; Assembly of the pre-replicative complex; Unwinding of DNA; Regulation of DNA replication; Activation of ATR in response to replication stress; Activation of the pre-replicative complex; Orc1 removal from chromatin; Removal of licensing factors from origins	27	0	1.272	0.645746	24.82	110.9	85.1	11.87	10.57	1.77929e+08	1.96028e+08	2.02818e+08	1.28668e+08	1.47832e+08	1.54047e+08	25	25	25	22	23	23	1	Met-loss+Acetyl [N-Term]
NP_115721.1	partner of Y14 and mago isoform 1 [OS=Homo sapiens]	0	44.376	49	5	26	5	204	22.6	9.45	69.44	5	Pf09282	84305	WIBG; PYM1	12	ENSG00000170473.16		mRNA surveillance pathway; RNA transport		2	0	1.099	0.968415	35.53	103.9	92.6	5.78	43.09	1.35329e+07	1.22555e+07	1.43779e+07	1.04614e+07	1.12845e+07	2.12617e+07	3	4	3	4	4	4	1
NP_001226.2	serpin H1 precursor [OS=Homo sapiens]	0	168.739	48	14	102	2	418	46.4	8.69	295.77	14	Pf00079	871	SERPINH1	11	ENSG00000149257.13	Endochondral Ossification		Collagen biosynthesis and modifying enzymes	4	11	0.859	0.474712	31.66	102.5	116.9	13.49	21.65	1.35758e+08	1.49003e+08	1.66596e+08	1.2405e+08	1.75623e+08	1.85572e+08	13	13	13	13	13	13	1
AAA67526.1	MTHSP75 [OS=Homo sapiens]	0	296.546	48	29	288	29	679	73.7	6.3	677.88	29	Pf00012, Pf06723	3313	HSPA9	5		Parkin-Ubiquitin Proteasomal System pathway			1	0	1.014	0.917292	36.44	97.4	87.5	6.53	7.3	4.72741e+08	3.6834e+08	4.02746e+08	3.94636e+08	3.39816e+08	3.41187e+08	26	24	24	26	26	23	1
BAD96295.1	TATA binding protein interacting protein 49 kDa variant, partial [OS=Homo sapiens]	0	159.642	48	16	144	16	456	50.2	6.29	320.93	16	Pf00004, Pf01078, Pf01695, Pf05496, Pf06068, Pf06414, Pf07726, Pf13191, Pf13238, Pf13245, Pf13481	8607	RUVBL1	3		Gastric Cancer Network 1			1	0	0.993	0.883937	23.31	96.7	97	3.65	4.37	1.69699e+08	1.56271e+08	1.72919e+08	1.53757e+08	1.63355e+08	1.60723e+08	15	16	16	16	16	16	1
NP_003290.1	endoplasmin precursor [OS=Homo sapiens]	0	376.752	48	39	329	2	803	92.4	4.84	795.55	39	Pf00183, Pf02518, Pf13589	7184	HSP90B1	12	ENSG00000166598.14	Photodynamic therapy-induced unfolded protein response; Focal Adhesion-PI3K-Akt-mTOR-signaling pathway; Sudden Infant Death Syndrome (SIDS) Susceptibility Pathways	Thyroid hormone synthesis; Pathways in cancer; Estrogen signaling pathway; Prostate cancer; PI3K-Akt signaling pathway; Protein processing in endoplasmic reticulum	Post-translational protein phosphorylation; Regulation of Insulin-like Growth Factor (IGF) transport and uptake by Insulin-like Growth Factor Binding Proteins (IGFBPs); ATF6 (ATF6-alpha) activates chaperone genes; Interleukin-4 and 13 signaling; Trafficking and processing of endosomal TLR; Scavenging by Class A Receptors	26	34	0.873	0.529617	28.59	97.5	108	4.36	3.25	6.02927e+08	4.85303e+08	5.36049e+08	5.46314e+08	5.69003e+08	5.59708e+08	36	35	35	33	35	36	1
AAA36621.1	Small nuclear ribonucleoprotein E, partial [OS=Homo sapiens]	0	10.135	48	3	8	3	81	9.6	8.79	10.95	3	Pf01423	6635	SNRPE	1		mRNA Processing			1	0	1.004	0.890905	8.86	96.2	97.7	17.03	13.99	2.11624e+06	2.41991e+06	2.81749e+06	2.66725e+06	2540979	1.98799e+06	1	1	2	2	1	1	1
XP_016857913.1	PREDICTED: F-actin-capping protein subunit alpha-1 isoform X1 [OS=Homo sapiens]	0	76.622	48	10	62	1	318	36.5	5.85	143.93	10	Pf01267	829	CAPZA1	1					0	9	0.941	0.763028	27.83	97.5	100.6	11.63	5.65	5.74588e+07	5.95253e+07	6.86787e+07	63942849	6.34915e+07	6.89054e+07	10	10	10	10	10	10	1	Met-loss+Acetyl [N-Term]
NP_001307526.1	probable ATP-dependent RNA helicase DDX5 isoform b [OS=Homo sapiens]	0	244.41	48	28	219	21	614	69	8.85	423.43	28	Pf00270, Pf00271, Pf08061	1655	DDX5	17	ENSG00000108654.13				0	0	1.262	0.670738	22.57	109.1	90	2.65	8.93	2.66415e+08	2.2601e+08	2.59169e+08	1.74912e+08	2.03034e+08	1.96874e+08	19	19	18	17	18	19	1
NP_001895.1	catenin beta-1 isoform 1 [OS=Homo sapiens]	0	311.654	48	26	268	23	781	85.4	5.86	704.22	26	Pf00514	1499	CTNNB1	3	ENSG00000168036.16	Androgen receptor signaling pathway; MicroRNAs in cardiomyocyte hypertrophy; Heart Development; TNF related weak inducer of apoptosis (TWEAK) Signaling Pathway; Neural Crest Differentiation; Arrhythmogenic Right Ventricular Cardiomyopathy; Pathogenic Escherichia coli infection; Corticotropin-releasing hormone signaling pathway; Adipogenesis; Gastric cancer network 2; Brain-Derived Neurotrophic Fa…	Tight junction; Melanogenesis; Prostate cancer; Basal cell carcinoma; Breast cancer; Leukocyte transendothelial migration; Hippo signaling pathway; Focal adhesion; Arrhythmogenic right ventricular cardiomyopathy (ARVC); HTLV-I infection; Signaling pathways regulating pluripotency of stem cells; Pathways in cancer; Bacterial invasion of epithelial cells; Endometrial cancer; Proteoglycans in cancer…	Beta-catenin phosphorylation cascade; CDO in myogenesis; Binding of TCF/LEF:CTNNB1 to target gene promoters; Apoptotic cleavage of cell adhesion proteins; RUNX3 regulates WNT signaling; S37 mutants of beta-catenin aren't phosphorylated; LRR FLII-interacting protein 1 (LRRFIP1) activates type I IFN production; Ca2+ pathway; S33 mutants of beta-catenin aren't phosphorylated; Disassembly of the dest…	107	3	1.588	0.09414	46.5	127.1	77.7	21.33	26.85	5.75151e+08	7.52951e+08	8.08351e+08	2.89423e+08	4.79723e+08	4.65921e+08	25	28	27	27	27	27	1	Met-loss+Acetyl [N-Term]
AAH62716.1	Ribosomal protein L23 [OS=Homo sapiens]	0	104.266	48	9	108	9	140	14.9	10.62	317.13	9	Pf00238	9349	RPL23	17		Cytoplasmic Ribosomal Proteins			1	0	1.065	0.989141	21.75	99.1	96.6	2.36	1.58	2.04206e+08	1.78821e+08	2.02203e+08	1.83035e+08	1.84684e+08	1.78806e+08	9	8	8	9	8	8	1
AAH13296.1	Ribosomal protein s6 [OS=Homo sapiens]	0	189.488	48	13	158	2	249	28.7	10.9	347.28	13	Pf01092	6194	RPS6	9		IL-5 Signaling Pathway; Human Thyroid Stimulating Hormone (TSH) signaling pathway; Leptin signaling pathway; Follicle Stimulating Hormone (FSH) signaling pathway; Prolactin Signaling Pathway; Interleukin-11 Signaling Pathway; Oncostatin M Signaling Pathway; Brain-Derived Neurotrophic Factor (BDNF) signaling pathway; Kit receptor signaling pathway; VEGFA-VEGFR2 Signaling Pathway; Cytoplasmic Ribos…			13	12	1.085	0.984352	26.79	97.7	98.9	5.91	10.57	9.60726e+08	7.45634e+08	8.746e+08	9.65193e+08	7.66685e+08	8.358e+08	14	14	13	14	13	13	1	Met-loss [N-Term]
AAB61466.1	P21-Arc [OS=Homo sapiens]	0	53.497	48	7	43	7	178	20.5	8.59	110.92	7	Pf04062	10094	ARPC3	12		Pathogenic Escherichia coli infection			1	0	1.217	0.772162	20.16	111	91.9	3.6	14.31	4.49768e+07	3.82209e+07	4.46271e+07	26854874	3.36135e+07	3.4295e+07	7	7	7	6	6	7	1	Met-loss [N-Term]
BAD92708.1	ribosomal protein L12 variant, partial [OS=Homo sapiens]	0	109.83	48	9	110	2	197	21.5	10.1	349.42	9	Pf00298, Pf03946	100130447	RPL12P16	2					0	7	0.982	0.854522	22.43	96.9	100.2	5.64	5.96	1.97022e+08	1.53691e+08	1.76084e+08	1.92502e+08	1.68572e+08	1.71822e+08	9	9	9	9	9	9	1
Q9UMY4.3	RecName: Full=Sorting nexin-12 [OS=Homo sapiens]	0	28.297	48	7	31	6	172	19.7	7.87	32.09	7	Pf00787	29934	SNX12	X			Endocytosis		1	0	1.083	0.987276	29.72	106.5	91.8	5.48	8.97	4.38628e+07	3.44219e+07	3.87505e+07	3.43463e+07	3.17437e+07	2.79457e+07	6	6	6	6	6	6	1	Met-loss+Acetyl [N-Term]
P30044.4	RecName: Full=Peroxiredoxin-5, mitochondrial; AltName: Full=Alu corepressor 1; AltName: Full=Antioxidant enzyme B166; Short=AOEB166; AltName: Full=Liver tissue 2D-page spot 71B; AltName: Full=PLP; AltName: Full=Peroxiredoxin V; Short=Prx-V; AltName: Full=Peroxisomal antioxidant enzyme; AltName: Full=TPx type VI; AltName: Full=Thioredoxin peroxidase PMP20; Flags: Precursor [OS=Homo sapiens]	0	58.118	48	7	31	7	214	22.1	8.7	73.55	7	Pf00578, Pf08534	25824	PRDX5	11	ENSG00000126432.13	Selenium Micronutrient Network	Peroxisome	Detoxification of Reactive Oxygen Species	5	0	0.766	0.176842	37.92	71.9	125.7	35.26	24	3.91671e+07	1.96719e+07	2.07154e+07	4.9349e+07	3.06061e+07	3.53095e+07	6	5	6	6	6	7	1
NP_001013269.1	4F2 cell-surface antigen heavy chain isoform f [OS=Homo sapiens]	0	224.263	48	19	158	19	529	57.9	5.35	527.21	19	Pf00128	6520	SLC3A2	11	ENSG00000168003.16				0	0	0.962	0.805793	33.62	88.8	94.6	11	3.67	3.06861e+08	2.17948e+08	2.49127e+08	2.57552e+08	236532204	2.50206e+08	16	16	18	17	16	17	1	Met-loss+Acetyl [N-Term]
AAG39280.1	MSTP029 [OS=Homo sapiens]	0	116.689	48	16	78	16	475	51.4	9.41	197.85	16	Pf00108, Pf00109, Pf02803	3032	HADHB	2		Fatty Acid Beta Oxidation			1	0	1.013	0.914951	33.28	98.9	108.1	14.84	7.16	6.57748e+07	4.33445e+07	5.10895e+07	5.09371e+07	5.75465e+07	5.26604e+07	14	13	14	14	14	13	1
NP_005795.2	ATP-dependent RNA helicase DDX39A [OS=Homo sapiens]	0	158.777	48	17	150	6	427	49.1	5.68	333.81	17	Pf00270, Pf00271, Pf14617	10212	DDX39A	19	ENSG00000123136.14			Cleavage of Growing Transcript in the Termination Region ; Transport of Mature mRNA derived from an Intron-Containing Transcript; mRNA 3'-end processing	9	0	0.994	0.88775	32.48	104.3	86.6	17.18	22.31	7.06643e+07	7.46215e+07	5.77153e+07	5.40247e+07	5.99025e+07	3.76755e+07	4	4	4	6	6	5	1	Met-loss+Acetyl [N-Term]
EAW93399.1	hCG1782414 [OS=Homo sapiens]	0	49.305	48	7	52	7	160	18.5	10.49	93.99	7	Pf01157	100131205	RPL21P28	1					0	0	1.383	0.373609	39.75	105	85.4	5.23	4.14	2.13409e+08	1.73906e+08	1.83031e+08	1.49244e+08	1.3721e+08	1.47357e+08	7	7	7	6	7	7	1
EAW56827.1	heterogeneous nuclear ribonucleoprotein L, isoform CRA_b [OS=Homo sapiens]	0	262.111	47	21	159	20	590	64.2	8.22	439.27	21	Pf00076, Pf13893, Pf14259	3191	HNRNPL	19		mRNA Processing			1	1	0.892	0.602276	37.62	95.2	117.8	0.95	1.95	3.00241e+08	2.57228e+08	2.82907e+08	3.38963e+08	3.43825e+08	3.30293e+08	18	18	19	20	19	19	1
AAA60288.1	Ribosomal protein s6 [OS=Homo sapiens]	0	167.66	47	12	143	1	249	28.7	10.9	314.84	12	Pf01092	6194	RPS6	9		IL-5 Signaling Pathway; Human Thyroid Stimulating Hormone (TSH) signaling pathway; Leptin signaling pathway; Follicle Stimulating Hormone (FSH) signaling pathway; Prolactin Signaling Pathway; Interleukin-11 Signaling Pathway; Oncostatin M Signaling Pathway; Brain-Derived Neurotrophic Factor (BDNF) signaling pathway; Kit receptor signaling pathway; VEGFA-VEGFR2 Signaling Pathway; Cytoplasmic Ribos…			13	0	1.145	0.924934	10.69	114.6	100.1	4.21	14.39		4.05147e+06	4.15136e+06	3380393	4339418	3.52424e+06		1	1	1	1	1	1	Met-loss [N-Term]
EAW79789.1	hCG1777176, isoform CRA_b [OS=Homo sapiens]	0	66.196	47	9	100	1	152	17.7	10.86	176.78	9	Pf00416	100131863	RPS18P5	3					0	0	1.226	0.753401	29.02	101.2	86.4	26.26	13.62	65641180	34667456	44786608	29826032	36345572	37852268	1	1	1	1	1	1	1	Met-loss+Acetyl [N-Term]
AAA35922.1	G protein beta subunit [OS=Homo sapiens]	0	108.697	47	12	91	9	340	37.3	6.18	216.57	12	Pf00400	2783	GNB2	7		Corticotropin-releasing hormone signaling pathway; Myometrial Relaxation and Contraction Pathways; G Protein Signaling Pathways; Calcium Regulation in the Cardiac Cell			4	3	1.099	0.968415	24.96	105	93.9	3.88	4.3	1.1716e+08	9.49256e+07	1.0542e+08	9.72628e+07	8.95062e+07	8.7252e+07	9	9	10	10	10	11	1	Met-loss+Acetyl [N-Term]
AAQ18036.1	Transformation-related protein 14 [OS=Homo sapiens]	0	90.288	47	10	39	10	394	42.8	5.82	91.79	10	Pf00561, Pf03096, Pf12697	10397	NDRG1	8		VEGFA-VEGFR2 Signaling Pathway			1	0	0.73	0.106377	35.16	76.5	105.7	19.7	25.12	3.50332e+07	2.17515e+07	2.44164e+07	4.49004e+07	3.20715e+07	2.69957e+07	7	7	7	8	8	7	1
XP_005268405.1	PREDICTED: glucosamine-6-phosphate isomerase 1 isoform X1 [OS=Homo sapiens]	0	112.511	47	10	51	10	318	36.1	7.61	189.34	10	Pf01182	10007	GNPDA1	5					0	0	0.888	0.590423	35.39	93.3	106	21.48	8.18	4.84185e+07	2.89521e+07	3.31741e+07	3.65522e+07	3.77757e+07	3.1867e+07	9	9	9	7	8	8	1
AAA61298.1	transfer RNA-Trp synthetase [OS=Homo sapiens]	0	184.926	47	13	126	13	471	53.1	6.11	379.33	13	Pf00458, Pf00579	7453	WARS	14		Photodynamic therapy-induced unfolded protein response; Tryptophan metabolism			2	0	0.682	0.0432778	42.89	94.4	112.3	4.12	20.77	1.33299e+08	1.10866e+08	1.16652e+08	1.94246e+08	1.36281e+08	1.33069e+08	12	12	12	12	11	11	1
ABD14420.1	eukaryotic translation elongation factor 1 gamma, partial [OS=Homo sapiens]	0	42.325	47	3	54	1	87	9.6	6.77	131.79	3	Pf02798, Pf13409, Pf13417	1937	EEF1G	11		Translation Factors			1	0	0.874	0.536752	6.8	93.4	106.8	4.2	7.51	12366486	9929721	11203056	1.1491e+07	13090158	12083343	1	1	1	1	1	1	1	Acetyl [N-Term]
EAW80221.1	myosin ID, isoform CRA_a [OS=Homo sapiens]	0	222.287	47	35	164	35	1021	117.7	9.41	333.48	35	Pf00063, Pf06017	4642	MYO1D	17					0	0	1.317	0.527322	29.2	125.5	83.3	3.87	3.38	2.03458e+08	1.70341e+08	2.00166e+08	1.2032e+08	1.26153e+08	1.2102e+08	31	31	33	31	32	32	1
AAV38549.1	protein phosphatase 1, catalytic subunit, beta isoform [OS=Homo sapiens]	0	131.836	47	13	96	5	327	37.1	6.19	238.25	13	Pf00149	5500	PPP1CB	2		G13 Signaling Pathway			1	0	0.982	0.854118	31.52	102.2	108.5	9.17	28.5	5.49454e+07	4.48472e+07	4.34207e+07	55643085	3.02968e+07	4.88066e+07	5	5	5	5	4	5	1	Met-loss+Acetyl [N-Term]
AAB02546.1	Gu protein, partial [OS=Homo sapiens]	0	287.529	47	34	165	33	801	89.2	9.32	372.54	34	Pf00270, Pf00271, Pf08152, Pf14617	9188	DDX21	10					0	1	0.937	0.753401	31.36	102	97.5	1.66	8.32	1.4609e+08	1.25886e+08	1.34206e+08	1.44242e+08	1.21523e+08	1.23405e+08	28	30	30	29	29	31	1
CAG33182.1	ATOX1 [OS=Homo sapiens]	0	50.622	47	3	34	3	68	7.4	7.24	72.45	3	Pf00403	475	ATOX1	5					0	0	0.992	0.88306	18.73	101.4	106.6	12.88	6.93	69965026	4.8522e+07	5.44226e+07	5.54899e+07	4.96475e+07	5.65668e+07	3	3	3	3	3	3	1
XP_005260640.1	PREDICTED: mRNA export factor isoform X3 [OS=Homo sapiens]	0	83.735	47	11	46	11	406	45	8.12	119.21	11	Pf00400	8480	RAE1	20					0	0	1.064	0.988452	25.2	109.8	96.8	7.1	6.67	66002586	5.02103e+07	5.71024e+07	4.51911e+07	5.06171e+07	4.74829e+07	9	10	10	10	10	10	1
NP_001025189.1	adenine phosphoribosyltransferase isoform b [OS=Homo sapiens]	0	39.103	47	5	28	5	134	14.5	7.34	37.64	5	Pf00156	353	APRT	16	ENSG00000198931.10				0	0	1.03	0.948728	25.09	97.8	107.9	10.56	4.04	8.23105e+07	59905512	6.56745e+07	7.02291e+07	7.09147e+07	6.49653e+07	5	5	5	5	5	5	1	Met-loss+Acetyl [N-Term]
NP_079472.1	GrpE protein homolog 1, mitochondrial precursor [OS=Homo sapiens]	0	45.945	47	6	29	6	217	24.3	8.12	41.98	6	Pf01025	80273	GRPEL1	4	ENSG00000109519.12			Mitochondrial protein import; Metabolism of proteins	2	0	1.219	0.768555	40.78	102.2	108.7	18.39	8.09	2.82705e+07	2.29595e+07	1.86082e+07	2.30488e+07	2.52434e+07	2.63273e+07	5	6	5	6	6	6	1
NP_001291417.1	mitochondrial import inner membrane translocase subunit Tim9 isoform b [OS=Homo sapiens]	0	12.238	47	2	11	2	66	7.6	5.06	27.25	2	Pf02953	26520	TIMM9	14	ENSG00000100575.13				0	0	1.015	0.91118	23.58	103.2	94.4	12.73	27.27	5.19336e+06	3.82376e+06	3.86697e+06	4.73003e+06	3.61436e+06	2.63442e+06	2	2	2	2	2	1	1	Met-loss+Acetyl [N-Term]
NP_001753.1	t-complex protein 1 subunit zeta isoform a [OS=Homo sapiens]	0	217.277	47	22	186	22	531	58	6.68	316.11	22	Pf00118, Pf05504	908	CCT6A	7	ENSG00000146731.10			Prefoldin mediated transfer of substrate to CCT/TriC; Cooperation of PDCL (PhLP1) and TRiC/CCT in G-protein beta folding; Association of TriC/CCT with target proteins during biosynthesis; Formation of tubulin folding intermediates by CCT/TriC; Folding of actin by CCT/TriC	9	0	0.983	0.85749	25.95	98.4	100.1	3.63	5.37	3.72436e+08	3.06697e+08	3.31178e+08	3.48202e+08	3.06551e+08	3.19965e+08	21	20	20	19	19	22	1
AAA60236.1	Ubiquinone-binding protein [OS=Homo sapiens]	0	14.533	47	4	9	4	111	13.5	8.78	20.07	4	Pf02271	7381	UQCRB	8		Electron Transport Chain			1	0	1.496	0.252873	35.36	118.1	59.3	9.49	36.97	5.268e+06	4.90602e+06	6.01634e+06	2597877	1.95484e+06	3.95907e+06	3	3	3	2	3	3	1
NP_002070.1	Aspartate aminotransferase, cytoplasmic [OS=Homo sapiens]	0	101.194	47	12	56	12	413	46.2	7.01	132.89	12	Pf00155	2805	GOT1	10	ENSG00000120053.10	Alanine and aspartate metabolism; Trans-sulfuration pathway; Amino Acid metabolism; Glycolysis and Gluconeogenesis	Alanine, aspartate and glutamate metabolism; Arginine biosynthesis; Cysteine and methionine metabolism; Biosynthesis of amino acids; Carbon metabolism; Phenylalanine, tyrosine and tryptophan biosynthesis; Arginine and proline metabolism; 2-Oxocarboxylic acid metabolism; Metabolic pathways; Phenylalanine metabolism; Tyrosine metabolism	Gluconeogenesis; Amino acid synthesis and interconversion (transamination); Methionine salvage pathway	24	0	0.938	0.755163	25.76	101.3	102.2	6.35	9.07	6.62534e+07	5.10452e+07	5.82145e+07	6.28781e+07	5.57996e+07	5.10672e+07	11	11	11	10	10	10	1	Met-loss [N-Term]
NP_002856.1	Ras-related protein Rab-2A isoform a [OS=Homo sapiens]	0	59.281	47	8	37	8	212	23.5	6.54	99.34	8	Pf00009, Pf00025, Pf00071, Pf01926, Pf04670, Pf08477	5862	RAB2A	8	ENSG00000104388.14	Focal Adhesion-PI3K-Akt-mTOR-signaling pathway	AMPK signaling pathway	Golgi Cisternae Pericentriolar Stack Reorganization; RAB geranylgeranylation	10	0	0.946	0.779515	29.17	92	94.6	9.17	17.58	1.85029e+07	1.41219e+07	1.48125e+07	1.53054e+07	15366500	1.09154e+07	8	7	7	7	6	5	1
NP_919415.2	vesicle-associated membrane protein-associated protein A isoform 2 [OS=Homo sapiens]	0	111.679	47	11	96	10	249	27.9	8.62	167.03	11	Pf00635	9218	VAPA	18	ENSG00000101558.13	Exercise-induced Circadian Regulation	Tight junction	Neutrophil degranulation; Sphingolipid de novo biosynthesis	9	1	1.159	0.880326	25.32	106.6	81.1	2.29	12.4	1.34918e+08	1.12863e+08	1.23685e+08	9.12604e+07	8.72648e+07	1.07906e+08	10	10	10	11	11	10	1
EAW99816.1	hypothetical protein FLJ14668, isoform CRA_b [OS=Homo sapiens]	0	74.239	47	6	53	6	161	18	8.25	139.67	6	Pf05811	84908	FAM136A	2					0	0	1.107	0.961785	96.06	122.4	46.3	11.33	13.79	9.20512e+07	1.00641e+08	9.65554e+07	4.28007e+07	3.23172e+07	3.44789e+07	5	5	5	6	5	6	1
AFD36924.1	MHC class I antigen, partial [OS=Homo sapiens]	0	56.883	46	9	49	1	181	20.9	6.7	77.34	9	Pf00129								0	3	1.084	0.985012	40.31	84.3	57.8	5.22	28.77	4.61861e+07	3.7826e+07	3.95675e+07	41342928	2.41934e+07	2.65827e+07	2	3	3	2	2	2	1
BAG51639.1	unnamed protein product [OS=Homo sapiens]	0	26.814	46	3	10	3	153	17	6.02	29.16	3	Pf04699	81873	ARPC5L	9		Pathogenic Escherichia coli infection	Bacterial invasion of epithelial cells; Endocytosis; Fc gamma R-mediated phagocytosis; Pathogenic Escherichia coli infection; Shigellosis; Salmonella infection; Regulation of actin cytoskeleton		8	0	0.912	0.678643	19.18	103.2	108.2	7.53	10.53	6.65044e+06	6.21022e+06	7.33505e+06	5.71006e+06	6728845	6736142	2	2	2	2	1	1	1
EAW55544.1	histone 1, H4e [OS=Homo sapiens]	0	186.889	46	16	210	16	138	15.3	11.66	569.67	16	Pf00125, Pf02969, Pf15630	8367	HIST1H4E	6					0	0	1.048	0.969763	28.19	106.8	106.9	6.4	9.23	1.24957e+09	9.59734e+08	1.12579e+09	1.18332e+09	1.07072e+09	9.56326e+08	15	15	16	14	14	15	1
BAB79460.1	ribosomal protein L14 [OS=Homo sapiens]	0	104.883	46	12	106	12	220	23.8	10.93	165.97	12	Pf01929	9045	RPL14	3		Cytoplasmic Ribosomal Proteins			1	0	1.056	0.98095	25.2	101	93.1	1.26	4.2	2.54678e+08	2.25463e+08	2.47958e+08	2.19217e+08	2.08763e+08	2.25003e+08	10	10	10	11	10	10	1
EAW52359.1	ribosomal protein L18, isoform CRA_b [OS=Homo sapiens]	0	66.88	46	12	92	1	164	18.7	11.59	178.76	12	Pf00828	6141	RPL18	19	ENSG00000063177.12	Cytoplasmic Ribosomal Proteins			1	0	0.978	0.845267	7.86	106.6	107.7	3.72	15.55	33891568	31244380	34577924	42161196	32632472	31032922	1	1	1	1	1	1	1
NP_005554.1	stathmin isoform a [OS=Homo sapiens]	0	43.84	46	8	45	8	149	17.3	5.97	56.54	8	Pf00836, Pf09726	3925	STMN1	1	ENSG00000117632.22	Regulation of Microtubule Cytoskeleton; Retinoblastoma (RB) in Cancer; Rac1/Pak1/p38/MMP-2 pathway; MAPK Signaling Pathway; EGF/EGFR Signaling Pathway	MAPK signaling pathway; MicroRNAs in cancer		7	0	1.117	0.944697	28.74	110.4	92.3	13.25	7.23	1.81239e+08	2.03462e+08	2.15497e+08	1.54994e+08	1.7376e+08	1.7007e+08	8	8	7	8	7	7	1
AAD17527.1	Leucine aminopeptidase [OS=Homo sapiens]	0	122.076	46	16	68	16	519	56	7.69	159.49	16	Pf00883, Pf02789	51056	LAP3	4					0	0	1.072	0.999611	26.14	126.3	73.9	16.13	17.95	6.60614e+07	5.25482e+07	4.53249e+07	3.35588e+07	2.32691e+07	31531908	16	14	14	10	10	10	1
AAA60279.1	Ribosomal protein L26 [OS=Homo sapiens]	0	51.828	46	9	52	9	145	17.3	10.55	51.41	9	Pf00467	6154	RPL26	17		Cytoplasmic Ribosomal Proteins			1	0	1.196	0.803372	17.07	105.1	90.4	1.51	3.27	2.82179e+08	2.41861e+08	2.71044e+08	2.28572e+08	2.09959e+08	2.17339e+08	9	9	9	9	9	9	1
NP_005150.1	actin, alpha cardiac muscle 1 precursor [OS=Homo sapiens]	0	382.329	46	20	728	6	377	42	5.39	1396.65	20	Pf00022	70	ACTC1	15	ENSG00000159251.6	Cardiac Progenitor Differentiation; Myometrial Relaxation and Contraction Pathways; Striated Muscle Contraction	Dilated cardiomyopathy; Cardiac muscle contraction; Hypertrophic cardiomyopathy (HCM); Adrenergic signaling in cardiomyocytes	Striated Muscle Contraction	9	0	1.111	0.955242	71.28	129.2	87.3	33.8	31.39	5.34029e+08	2.31921e+08	3.72149e+08	2.30812e+08	3.86446e+08	2.37102e+08	4	5	4	5	5	3	1
NP_002559.2	Polyadenylate-binding protein 1 [OS=Homo sapiens]	0	246.843	46	29	225	20	636	70.6	9.5	465.81	29	Pf00076, Pf00658, Pf13893, Pf14259	26986	PABPC1	8	ENSG00000070756.15	Translation Factors; Endoderm Differentiation	RNA transport; mRNA surveillance pathway; RNA degradation	AUF1 (hnRNP D0) binds and destabilizes mRNA; L13a-mediated translational silencing of Ceruloplasmin expression; Regulation of expression of SLITs and ROBOs; Nonsense Mediated Decay (NMD) independent of the Exon Junction Complex (EJC); Translation initiation complex formation; Nonsense Mediated Decay (NMD) enhanced by the Exon Junction Complex (EJC); Deadenylation of mRNA	24	9	1.084	0.985514	26.26	107.3	95.5	4.91	0.99	5.47584e+08	4.33738e+08	4.91043e+08	4.17294e+08	4.16809e+08	4.12006e+08	27	27	26	24	25	24	1
EAX05823.1	annexin A3, isoform CRA_b [OS=Homo sapiens]	0	135.803	46	16	138	16	352	39.8	7.18	316.78	16	Pf00191	306	ANXA3	4		Prostaglandin Synthesis and Regulation			1	0	0.824	0.350194	26.75	90.1	113.2	13.54	4.52	1.98992e+08	1.37851e+08	1.51354e+08	1.92515e+08	1.80719e+08	1.711e+08	14	14	15	16	16	16	1	Met-loss+Acetyl [N-Term]
NP_001258522.1	protein phosphatase methylesterase 1 isoform b [OS=Homo sapiens]	0	106.066	46	13	108	13	400	43.8	5.85	280.58	13	Pf00561, Pf12695, Pf12697	51400	PPME1	11	ENSG00000214517.9				0	0	1.164	0.869094	58.72	117.7	87.1	37.37	37.94	74847490	1.39882e+08	1.51798e+08	5.1941e+07	1.06706e+08	1.12364e+08	12	13	13	11	10	11	1
CAG47015.1	G22P1 [OS=Homo sapiens]	0	313.139	46	29	255	1	609	69.8	6.64	562.91	29	Pf02037, Pf02735, Pf03730, Pf03731	2547	XRCC6	22					0	0	1.222	0.761517	29.54	97.6	89.4	25.76	18.41	7510620	7311731	1.14185e+07	5.65903e+06	8061772	6.87523e+06	1	1	1	1	1	1	1
NP_001288160.1	high mobility group protein B3 isoform b [OS=Homo sapiens]	0	83.58	46	10	58	10	220	25.5	9.06	121.5	10	Pf00505, Pf09011	3149	HMGB3	X					0	0	1.071	0.999203	33.35	102.4	102.3	4.81	7.2	8.64114e+07	7.0631e+07	8.44536e+07	8.38671e+07	7.78735e+07	70651694	9	9	9	9	9	9	1
NP_006232.1	protein phosphatase inhibitor 2 isoform 2 [OS=Homo sapiens]	0	87.66	46	9	55	9	205	23	4.74	97.29	9	Pf04979	5504	PPP1R2	3	ENSG00000184203.7				0	0	1.216	0.776003	21.77	112.9	94.9	17.53	7.2	6.31751e+07	7.4435e+07	8.42438e+07	5.89427e+07	6.46938e+07	6.58064e+07	6	8	8	9	9	9	1
NP_002122.1	high mobility group protein HMG-I/HMG-Y isoform b [OS=Homo sapiens]	0	38.902	46	4	56	1	96	10.7	10.32	113.5	4		3159	HMGA1	6	ENSG00000137309.19	Adipogenesis; Preimplantation Embryo; Senescence and Autophagy in Cancer			3	0	1.264	0.667206	45.25	122.7	74.7	22.86	42.05	96171089	68741274	57278213	86435467	43073104	42968999	1	1	1	1	1	1	1
NP_055205.2	staphylococcal nuclease domain-containing protein 1 [OS=Homo sapiens]	0	345.879	46	32	245	32	910	101.9	7.17	642.44	32	Pf00565, Pf00567	27044	SND1	7	ENSG00000197157.10		Epstein-Barr virus infection; Viral carcinogenesis	Signaling by BRAF and RAF fusions	6	0	0.913	0.678643	25.45	103	101.7	9.2	5.75	2.90039e+08	2.52659e+08	2.33454e+08	2.6393e+08	2.33369e+08	2.56e+08	31	30	30	32	32	32	1	Met-loss+Acetyl [N-Term]
BAA25818.1	ribosomal protein S11, partial [OS=Homo sapiens]	0	45.943	46	4	56	4	83	9.9	10.68	147.36	4	Pf00366	6205	RPS11	19		Cytoplasmic Ribosomal Proteins			1	0	1.207	0.79448	18.79	102.9	99.3	4.26	9.55	1.98658e+08	188188675	1.92858e+08	2.05569e+08	167886981	1.75533e+08	4	4	4	4	4	4	1
XP_005265952.1	PREDICTED: heterogeneous nuclear ribonucleoprotein H isoform X1 [OS=Homo sapiens]	0	179.142	46	15	151	9	472	51.2	6.8	393.46	15	Pf00076, Pf08080, Pf14259	3187	HNRNPH1	5; CHR_HG30_PATCH	ENSG00000169045.17; ENSG00000284254.1	Mecp2 and Associated Rett Syndrome; mRNA Processing			2	6	1.028	0.94478	34.48	111.6	94.3	3.09	2.77	4.15928e+08	3.43036e+08	3.7637e+08	3.23079e+08	3.01662e+08	2.99934e+08	14	14	14	14	14	14	1	Met-loss+Acetyl [N-Term]
EAW71815.1	ribosomal protein S4, X-linked, isoform CRA_a [OS=Homo sapiens]	0	229.41	46	21	218	21	385	43.4	9.95	528.18	21	Pf00900, Pf08071	6191	RPS4X	X		Cytoplasmic Ribosomal Proteins			1	0	1.184	0.828189	33.39	109.8	90.6	5.8	5.65	6.31306e+08	5.01315e+08	5.40963e+08	4.67455e+08	4.09972e+08	4.2428e+08	19	20	20	19	20	21	1
NP_060090.2	interleukin enhancer-binding factor 3 isoform d [OS=Homo sapiens]	0	294.476	46	28	208	26	898	95.7	8.81	434.22	28	Pf00035, Pf07528, Pf14709	3609	ILF3	19	ENSG00000129351.17				0	2	1.15	0.890905	30.15	103.6	95.3	2.08	4.59	3.7604e+08	3.15705e+08	3.54621e+08	3.259e+08	2.91668e+08	3.07683e+08	26	25	26	25	26	26	1
XP_011511565.1	PREDICTED: GMP synthase [glutamine-hydrolyzing] isoform X1 [OS=Homo sapiens]	0	203.78	46	22	136	3	699	77.4	6.98	352.32	22	Pf00117, Pf00733, Pf00958, Pf01171, Pf02540, Pf03054, Pf06508, Pf07722	8833	GMPS	3					0	19	1.095	0.971016	18.93	106.8	95.7	1.96	1.9	1.48276e+08	1.3038e+08	1.46049e+08	1.19191e+08	1.20754e+08	1.19863e+08	18	17	18	19	17	19	1
AAT78421.1	Galphai2 protein [OS=Homo sapiens]	0	80.057	46	11	49	8	366	41.5	5.99	141.86	11	Pf00025, Pf00503	2771	GNAI2	3		Human Thyroid Stimulating Hormone (TSH) signaling pathway; Corticotropin-releasing hormone signaling pathway; Signal Transduction of S1P Receptor; G Protein Signaling Pathways; Calcium Regulation in the Cardiac Cell			5	3	1.152	0.890905	23.24	112	91.4	5.56	5.33	50915790	4.82264e+07	4.72423e+07	3.5099e+07	3.74815e+07	3.77336e+07	9	9	9	9	9	9	1
XP_016885242.1	PREDICTED: spermine synthase isoform X1 [OS=Homo sapiens]	0	67.641	46	9	53	9	369	41.4	4.97	148.58	9	Pf01564	6611	SMS	X		Urea cycle and metabolism of amino groups			1	0	1.058	0.983721	24.54	105.8	95.9	12.67	10.07	2.15518e+07	2.32136e+07	2.03641e+07	1.79792e+07	1.64472e+07	1.98613e+07	9	8	8	8	6	8	1
NP_005262.1	glutamate dehydrogenase 1, mitochondrial isoform a precursor [OS=Homo sapiens]	0	138.754	46	19	103	19	558	61.4	7.8	214.18	19	Pf00208, Pf02812	2746	GLUD1	10	ENSG00000148672.8	Amino Acid metabolism; Urea cycle and metabolism of amino groups	Nitrogen metabolism; Carbon metabolism; D-Glutamine and D-glutamate metabolism; Alanine, aspartate and glutamate metabolism; Arginine biosynthesis; Metabolic pathways; Proximal tubule bicarbonate reclamation	Transcriptional activation of mitochondrial biogenesis; Amino acid synthesis and interconversion (transamination)	15	0	0.923	0.712107	23.09	95.6	104.9	9.64	3.61	1.26066e+08	9.14565e+07	1.05228e+08	1.18679e+08	1.09698e+08	1.0822e+08	15	16	16	16	16	16	1
AAF18437.1	CHORD containing protein-1 [OS=Homo sapiens]	0	146.054	45	11	77	11	332	37.4	7.71	255.77	11	Pf04968, Pf04969	26973	CHORDC1	11					0	0	1.139	0.910767	39.95	85.6	141.5	2.84	40.02	5.65802e+07	5.20039e+07	5.4044e+07	1.0542e+08	8.4913e+07	4.2778e+07	9	8	7	9	9	10	1
Q99873.2	RecName: Full=Protein arginine N-methyltransferase 1; AltName: Full=Histone-arginine N-methyltransferase PRMT1; AltName: Full=Interferon receptor 1-bound protein 4 [OS=Homo sapiens]	0	115.767	45	13	93	13	361	41.5	5.43	204.78	13	Pf05175, Pf06325, Pf08241, Pf12847, Pf13649, Pf13847	3276	PRMT1	19		Energy Metabolism; mRNA Processing; Tryptophan metabolism; Interferon type I signaling pathways	FoxO signaling pathway; Glucagon signaling pathway	TP53 Regulates Transcription of Genes Involved in G2 Cell Cycle Arrest; RUNX1 regulates genes involved in megakaryocyte differentiation and platelet function; RMTs methylate histone arginines	17	0	1.101	0.967812	28.78	105.1	97	11.88	1.66	1.31236e+08	9.48333e+07	1.01102e+08	89858081	9.04287e+07	9.01575e+07	12	13	12	9	11	11	1
ALQ33840.1	vasodilator-stimulated phosphoprotein isoform 2, partial [OS=Homo sapiens]	0	193.232	45	15	115	15	328	35.4	8.94	399.67	15	Pf00568	7408	VASP	19		Integrin-mediated Cell Adhesion; Focal Adhesion			2	0	0.913	0.678643	44.1	88.8	115.7	2.23	2.62	7.65167e+07	6.64639e+07	6.9717e+07	9.12719e+07	8.57315e+07	8.93213e+07	14	13	12	11	13	12	1
CAA36839.1	Calmodulin [OS=Homo sapiens]	0	103.598	45	7	166	7	152	17.2	4.21	332.03	7	Pf00036, Pf08726, Pf12763, Pf13202, Pf13405, Pf13499, Pf13833, Pf14658	808	CALM3	19		Myometrial Relaxation and Contraction Pathways; Glycogen Metabolism; Calcium Regulation in the Cardiac Cell			3	0	0.952	0.79448	31.42	93.7	100.9	10.52	6.81	4.18457e+08	4.19633e+08	4.90431e+08	5.01484e+08	4.66853e+08	4.2581e+08	7	7	7	7	7	7	1	Met-loss+Acetyl [N-Term]
NP_055037.1	NADH dehydrogenase [ubiquinone] 1 alpha subcomplex subunit 8 isoform 1 [OS=Homo sapiens]	0	46.724	45	5	33	5	172	20.1	7.65	76.55	5	Pf06747	4702	NDUFA8	9	ENSG00000119421.6	Electron Transport Chain; Oxidative phosphorylation	Alzheimer's disease; Non-alcoholic fatty liver disease (NAFLD); Huntington's disease; Metabolic pathways; Oxidative phosphorylation; Parkinson's disease	Complex I biogenesis	13	0	1.459	0.234442	36.8	117.2	89.8	8.99	8.19	2.44403e+07	1.78158e+07	2.16313e+07	1.39132e+07	1.5801e+07	1.56241e+07	5	5	5	5	5	5	1	Met-loss [N-Term]
EAW93951.1	chromosome 7 open reading frame 24, isoform CRA_b [OS=Homo sapiens]	0	41.296	45	6	26	6	190	21.3	5.14	55.14	6	Pf06094, Pf13772	79017	GGCT	7					0	0	0.878	0.547459	17.54	72.5	106.6	9.02	8.07	2.47626e+07	2.4717e+07	2.80583e+07	4.26301e+07	3.75299e+07	3.54933e+07	6	6	6	6	6	6	1
NP_061185.1	Protein RCC2 [OS=Homo sapiens]	0	131.6	45	16	96	16	522	56	8.78	209.55	16	Pf00415, Pf13540	55920	RCC2	1; CHR_HG2095_PATCH	ENSG00000281540.2; ENSG00000179051.13			Amplification of signal from unattached kinetochores via a MAD2 inhibitory signal; Separation of Sister Chromatids; Resolution of Sister Chromatid Cohesion; RHO GTPases Activate Formins	16	0	0.966	0.817089	24.92	105.6	103.8	8.45	2.93	1.1591e+08	1.0191e+08	9.50368e+07	1.02544e+08	1.02773e+08	1.05716e+08	15	15	15	15	15	15	1
NP_001188306.1	alpha-aminoadipic semialdehyde dehydrogenase isoform 2 [OS=Homo sapiens]	0	84.788	45	14	44	14	511	55.3	6.86	90.1	14	Pf00171	501	ALDH7A1	5					0	0	1.155	0.88943	42.67	116.2	90.6	15.52	6.45	6.28143e+07	6.32154e+07	8.12379e+07	4.68996e+07	5.09398e+07	5.15592e+07	13	13	13	11	12	9	1
NP_001032411.1	ubiquitin carboxyl-terminal hydrolase 14 isoform b [OS=Homo sapiens]	0	114.461	45	17	58	17	459	52.4	5.78	111	17	Pf00443, Pf13423	9097	USP14	18	ENSG00000101557.14				0	0	0.93	0.733259	30.17	85	118.7	6.81	10.04	5.0549e+07	4.04229e+07	4.2032e+07	6.26477e+07	5.83355e+07	5.00033e+07	11	10	11	14	17	12	1
AAH13918.1	Eukaryotic translation elongation factor 1 gamma [OS=Homo sapiens]	0	184.412	45	17	209	15	437	50.1	6.67	613.28	17	Pf00043, Pf00647, Pf02798, Pf13409, Pf13410, Pf13417, Pf14497	1937	EEF1G	11		Translation Factors			1	2	0.9	0.632194	23.13	92.8	104.2	1.9	4.52	5.11863e+08	4.3033e+08	4.79209e+08	5.45115e+08	4.87987e+08	5.07599e+08	16	15	15	16	16	15	1	Met-loss+Acetyl [N-Term]
EAW88064.1	ribosomal protein L7a, isoform CRA_d, partial [OS=Homo sapiens]	0	179.822	45	21	219	21	313	35	11.08	394.09	21	Pf01248	6130	RPL7A	9		Cytoplasmic Ribosomal Proteins			1	0	1.075	0.995561	22.53	97.5	101.5	4.89	4.69	8.21616e+08	7.1345e+08	7.14051e+08	8.38989e+08	7.53142e+08	7.61271e+08	18	18	20	20	20	20	1
NP_001015509.1	peptidyl-tRNA hydrolase 2, mitochondrial isoform a [OS=Homo sapiens]	0	44.499	45	5	36	5	180	19.3	8.73	106.7	5	Pf01981	51651	PTRH2	17	ENSG00000141378.14				0	0	1	0.89225	49.52	99.7	81.7	7.74	4.69	2.72185e+07	2.03565e+07	2.38603e+07	1.8752e+07	2.00041e+07	1.84285e+07	5	5	5	5	5	5	1
NP_002120.1	High mobility group protein B2 [OS=Homo sapiens]	0	208.419	45	15	200	10	209	24	7.81	395.68	15	Pf00505, Pf09011	3148	HMGB2	4	ENSG00000164104.11	Retinoblastoma (RB) in Cancer; Ectoderm Differentiation		Activation of DNA fragmentation factor	7	0	1.313	0.536752	19.83	119.8	85.3	4.7	14.13	2.98268e+08	2.61474e+08	2.61299e+08	1.95506e+08	2.04299e+08	1.53291e+08	9	10	9	10	10	10	1
NP_001900.1	cathepsin D preproprotein [OS=Homo sapiens]	0	109.504	45	12	95	12	412	44.5	6.54	215.26	12	Pf00026, Pf07966, Pf14541, Pf14543	1509	CTSD	11	ENSG00000117984.13	Prolactin Signaling Pathway	Sphingolipid signaling pathway; Lysosome; Apoptosis; Tuberculosis	Collagen degradation; Metabolism of Angiotensinogen to Angiotensins; Neutrophil degranulation; MHC class II antigen presentation	16	0	1.069	0.996014	32.75	97.6	102.5	18.92	7.47	1.5004e+08	9.45845e+07	1.05527e+08	1.12562e+08	9.51224e+07	1.04527e+08	11	11	12	11	11	10	1
BAF82705.1	unnamed protein product [OS=Homo sapiens]	0	422.681	45	48	303	48	1394	157.8	6.13	748.34	48	Pf12854, Pf13041, Pf13812	10128	LRPPRC	2					0	0	1.256	0.683772	35.7	105.5	86.1	9.13	12.54	3.6338e+08	2.65627e+08	3.0711e+08	2.06307e+08	2.60215e+08	2.36282e+08	45	46	45	41	44	44	1
NP_001003701.1	ATP synthase-coupling factor 6, mitochondrial isoform b precursor [OS=Homo sapiens]	0	19.828	45	3	9	3	116	13.4	9.07	36.15	3	Pf05511	522	ATP5J	21	ENSG00000154723.12	Electron Transport Chain; Oxidative phosphorylation			2	0	1.091	0.999203	6.38	92.3	111.5	6.25	37.14	2.96232e+06	2.38229e+06	2.93363e+06	3.29394e+06	5.03525e+06	2.4319e+06	1	1	1	2	2	1	1
AAF29104.1	HSPC140 [OS=Homo sapiens]	0	66.144	45	10	59	1	346	38.4	5.12	122.98	10	Pf00899	10055	SAE1	19					0	0	0.01	1.62313e-16			300								838379						1	1
AAH09806.1	methylenetetrahydrofolate dehydrogenase (NADP+ dependent) 1, methenyltetrahydrofolate cyclohydrolase, formyltetrahydrofolate synthetase [OS=Homo sapiens]	0	236.441	45	32	170	1	935	101.5	7.18	403.78	32	Pf00763, Pf01268, Pf02882	4522	MTHFD1	14		Folate Metabolism; One Carbon Metabolism; Trans-sulfuration and one carbon metabolism			3	0	100	1.62313e-16		87.3		123.07		26490.4		362450				1		1				1	Met-loss [N-Term]; Acetyl [N-Term]
NP_150597.1	28S ribosomal protein S36, mitochondrial [OS=Homo sapiens]	0	31.831	45	3	22	3	103	11.5	9.99	36.23	3		92259	MRPS36	5; CHR_HSCHR5_2_CTG1_1	ENSG00000278461.4; ENSG00000134056.11			Mitochondrial translation initiation; Mitochondrial translation elongation; Mitochondrial translation termination	6	0	1.669	0.0493735	17.63	124.5	73.2	8.93	8.94	2.38242e+07	2.04363e+07	1.91404e+07	1.40266e+07	1.2413e+07	1.14297e+07	1	2	2	2	2	2	1
NP_001289978.1	myosin regulatory light chain 12A isoform 2 [OS=Homo sapiens]	0	34.219	45	5	40	5	177	20.4	4.75	128.88	5	Pf00036, Pf13202, Pf13405, Pf13833	10627	MYL12A	18	ENSG00000101608.12				0	0	0.958	0.801912	16.88	96	108.8	4.74	1.09	8.66739e+07	7.89823e+07	9.04468e+07	9.43786e+07	9.19755e+07	9.3232e+07	5	5	5	4	5	5	1
AAD44488.1	p47 [OS=Homo sapiens]	0	95.118	45	12	70	1	370	40.5	5.14	151.97	12	Pf00789, Pf08059, Pf14555	55968	NSFL1C	20			Protein processing in endoplasmic reticulum		1	0	0.941	0.787792	5.24	96.5	102.5	5.57	1.7	2.95935e+06	2878546	2.90896e+06	2.96069e+06		2.95036e+06	1	1	1	1		1	1
NP_006796.1	Heterogeneous nuclear ribonucleoprotein A0 [OS=Homo sapiens]	0	104.332	45	8	65	8	305	30.8	9.29	177.55	8	Pf00076, Pf13893, Pf14259	10949	HNRNPA0	5	ENSG00000177733.6			mRNA Splicing - Major Pathway	4	0	1.037	0.958519	60.71	109	88.8	5.29	4.57	1.07918e+08	9.08334e+07	9.22443e+07	7.80563e+07	7.09274e+07	7.65942e+07	6	6	6	6	6	6	1
XP_005262724.1	PREDICTED: UDP-glucose 6-dehydrogenase isoform X1 [OS=Homo sapiens]	0	109.573	45	14	72	14	507	56.4	6.92	164.46	14	Pf00984, Pf03720, Pf03721	7358	UGDH	4					0	0	0.977	0.844928	44.76	91.3	104.2	8.04	13.82	5.20887e+07	3.8728e+07	4.54465e+07	6.29068e+07	4.85901e+07	4.89259e+07	14	12	12	13	13	13	1
XP_016882602.1	PREDICTED: 40S ribosomal protein S19 isoform X1 [OS=Homo sapiens]	0	72.019	45	11	82	11	193	21	10.3	112.3	11	Pf01090	6223	RPS19	19		Cytoplasmic Ribosomal Proteins			1	0	1.115	0.949683	34.17	117.9	85	7.01	2.88	2.62501e+08	2.30595e+08	2.20866e+08	1.74192e+08	1.62432e+08	1.69628e+08	11	10	10	10	9	9	1	Met-loss [N-Term]
BAH13430.1	unnamed protein product [OS=Homo sapiens]	0	88.666	45	10	73	10	238	26.7	5.08	176.7	10	Pf00036, Pf13405, Pf13499	4637	MYL6	12	ENSG00000092841.18	Focal Adhesion			1	0	1.012	0.91118	30.1	99.6	97.1	10.03	8.1	2.68688e+08	2.77984e+08	3.07674e+08	2.53042e+08	2.79965e+08	2.8825e+08	10	11	10	10	11	11	1
EAW64946.1	hCG2002013, isoform CRA_a [OS=Homo sapiens]	0	306.836	45	23	225	22	584	63.5	8.41	610.54	23	Pf00478, Pf00571, Pf00977, Pf01070, Pf03060	3615	IMPDH2	3					0	1	1.152	0.890905	32.52	100.7	93.9	7.9	6.5	4.20375e+08	3.22447e+08	3.47582e+08	3.49342e+08	3.03397e+08	3.08369e+08	23	23	23	23	22	23	1
AAA35564.1	alternative [OS=Homo sapiens]	0	89.291	45	14	117	13	292	32	5.91	251.78	14	Pf00076, Pf13893, Pf14259	6426	SRSF1	17		mRNA Processing			1	1	1.011	0.91118	27.56	104.8	100.2	5.54	1.57	1.45199e+08	1.22557e+08	1.23586e+08	1.26194e+08	1.19968e+08	1.20148e+08	14	14	13	14	14	14	1	Met-loss+Acetyl [N-Term]
NP_002622.2	6-phosphogluconate dehydrogenase, decarboxylating isoform 1 [OS=Homo sapiens]	0	113.325	45	17	115	17	483	53.1	7.23	254.36	17	Pf00393, Pf03446	5226	PGD	1	ENSG00000142657.20	Pentose Phosphate Pathway; NRF2 pathway	Pentose phosphate pathway; Carbon metabolism; Metabolic pathways; Glutathione metabolism	Pentose phosphate pathway (hexose monophosphate shunt)	9	0	1.028	0.944762	29.85	88.9	99	3.36	4.51	1.37958e+08	1.24766e+08	1.40104e+08	1.37917e+08	1.47725e+08	1.42596e+08	16	15	16	15	16	17	1
NP_003008.1	Serine/arginine-rich splicing factor 3 [OS=Homo sapiens]	0	88.51	45	7	93	7	164	19.3	11.65	272.55	7	Pf00076, Pf13893, Pf14259	6428	SRSF3	6	ENSG00000112081.16	mRNA Processing	Spliceosome; Herpes simplex infection	Cleavage of Growing Transcript in the Termination Region ; Transport of Mature mRNA derived from an Intron-Containing Transcript; mRNA 3'-end processing; mRNA Splicing - Major Pathway	14	0	1.048	0.970661	34.91	105.4	92.8	3.34	4.1	2.10915e+08	1.73439e+08	1.89646e+08	1.61863e+08	1.68848e+08	1.55319e+08	7	7	7	7	7	7	1	Acetyl [N-Term]
NP_808210.2	small nuclear ribonucleoprotein Sm D2 isoform 2 [OS=Homo sapiens]	0	50.755	44	6	49	6	108	12.4	9.89	99.41	6	Pf01423	6633	SNRPD2	19	ENSG00000125743.10	mRNA Processing			1	0	1.2	0.801912	37.42	120.2	83	3.94	7.07	1.13337e+08	9.85645e+07	1.00253e+08	7.46595e+07	7.03369e+07	6.3189e+07	6	6	6	5	6	6	1
AAH07909.1	FASN protein [OS=Homo sapiens]	0	136.496	44	14	93	1	439	48.3	5.58	236.27	14	Pf00975	2194	FASN	17		SREBF and miR33 in cholesterol and lipid homeostasis; Liver X Receptor Pathway; Fatty Acid Biosynthesis			3	0	100	1.62313e-16		152.5		50.78			2.00631e+06	1.02901e+06					1	1				1	Met-loss [N-Term]
NP_066272.1	PDZ and LIM domain protein 1 [OS=Homo sapiens]	0	65.807	44	9	41	9	329	36	7.02	90.83	9	Pf00412, Pf00595, Pf13180	9124	PDLIM1	10	ENSG00000107438.8				0	0	1.049	0.970674	27.13	118.2	86.1	13.58	10.25	2.70423e+07	3.10464e+07	3.05178e+07	1.85671e+07	2.22748e+07	2.09846e+07	8	9	8	7	6	6	1
AAP97139.1	p47 [OS=Homo sapiens]	0	102.416	44	12	70	1	372	40.9	5.1	152.29	12	Pf00789, Pf08059, Pf14555	55968	NSFL1C	20					0	10	1.138	0.91118	38.12	116.4	82.6	2.42	4.63	7.11203e+07	6.19448e+07	6.46642e+07	5.00093e+07	4.53916e+07	4.48531e+07	9	9	8	10	9	9	1
EAW58717.1	hCG27283 [OS=Homo sapiens]	0	49.254	44	4	40	4	115	13	10.7	77.69	4	Pf01283								0	0	0.951	0.793715	32.95	96.2	102	9.46	13.96	7.35765e+07	5.64652e+07	5.83027e+07	7.45675e+07	5.55623e+07	6.14627e+07	3	3	3	3	3	3	1
BAD97328.1	tyrosyl-tRNA synthetase variant, partial [OS=Homo sapiens]	0	124.385	44	20	82	20	528	59.1	7.21	190.93	20	Pf00579, Pf01588	8565	YARS	1					0	0	0.83	0.371831	38.46	80.4	112.1	6.45	2.82	6.98579e+07	5.63265e+07	5.84346e+07	8.5706e+07	8.11099e+07	7.88692e+07	18	18	17	18	18	20	1	Met-loss+Acetyl [N-Term]
XP_005259725.1	PREDICTED: far upstream element-binding protein 2 isoform X1 [OS=Homo sapiens]	0	226.415	44	23	166	22	747	76.6	7.33	372.69	23	Pf00013, Pf07650, Pf09005, Pf13014	8570	KHSRP	19					0	1	1.302	0.567694	33.19	115.1	85.3	4.07	2.55	2.43665e+08	2.13964e+08	2.16099e+08	1.66913e+08	1.56202e+08	1.61793e+08	22	21	21	22	22	21	1
P11586.3	RecName: Full=C-1-tetrahydrofolate synthase, cytoplasmic; Short=C1-THF synthase; Includes: RecName: Full=Methylenetetrahydrofolate dehydrogenase; Includes: RecName: Full=Methenyltetrahydrofolate cyclohydrolase; Includes: RecName: Full=Formyltetrahydrofolate synthetase; Contains: RecName: Full=C-1-tetrahydrofolate synthase, cytoplasmic, N-terminally processed [OS=Homo sapiens]	0	240.789	44	32	177	1	935	101.5	7.3	460.85	32	Pf00763, Pf01268, Pf02882	4522	MTHFD1	14		Folate Metabolism; One Carbon Metabolism; Trans-sulfuration and one carbon metabolism	One carbon pool by folate; Metabolic pathways	Metabolism of folate and pterines	9	31	1.007	0.905161	28.81	98.8	95.7	2.31	2.83	2.79357e+08	2.55367e+08	2.72871e+08	2.63228e+08	2.43776e+08	2.49116e+08	29	30	29	32	32	31	1	Met-loss [N-Term]; Acetyl [N-Term]
BAA11226.1	26S proteasome subunit p97 [OS=Homo sapiens]	0	290.22	44	33	194	33	908	100.1	5.2	426.84	33	Pf01851	5708	PSMD2	3		Proteasome Degradation; TNF alpha Signaling Pathway; Parkin-Ubiquitin Proteasomal System pathway			3	0	1.239	0.723166	30.31	117.6	81.2	7.37	6.68	3.40745e+08	3.34579e+08	3.72241e+08	2.31641e+08	2.38812e+08	2.57018e+08	31	31	29	28	28	29	1	Acetyl [N-Term]
NP_004528.1	nucleosome assembly protein 1-like 1 isoform 1 [OS=Homo sapiens]	0	227.882	44	14	149	12	391	45.3	4.46	456.23	14	Pf00956	4673	NAP1L1	12	ENSG00000187109.13				0	2	1.151	0.890905	24.03	103	92	6.95	8.39	1.75546e+08	1.34709e+08	1.50215e+08	1.12385e+08	1.28313e+08	1.26453e+08	12	11	12	11	11	11	1	Met-loss+Acetyl [N-Term]
EAW77774.1	ribosomal protein L4, isoform CRA_b [OS=Homo sapiens]	0	256.139	44	23	218	3	477	52.9	10.96	542.91	23	Pf00573, Pf14374	6124	RPL4	15		Cytoplasmic Ribosomal Proteins			1	21	0.948	0.781832	33.56	96.3	108.4	14.05	0.57	5.11637e+08	3.61412e+08	3.76792e+08	4.31083e+08	4.17694e+08	4.17125e+08	24	21	21	23	23	23	1
CAG33032.1	SNRPF [OS=Homo sapiens]	0	26.512	44	3	26	1	86	9.7	4.67	76.38	3	Pf01423	6636	SNRPF	12		mRNA Processing			1	0	2.357	2.88383e-05	8.85	159	68.9	29.73	32.6	4.16219e+07	2.10786e+07	4.19162e+07	8.89915e+06	1.6899e+07	1.61652e+07	1	1	1	1	1	1	1	Met-loss+Acetyl [N-Term]
BAG51833.1	unnamed protein product [OS=Homo sapiens]	0	111.034	44	12	52	2	356	38.7	8.41	184.17	12	Pf00441, Pf08028	37	ACADVL	17		Fatty Acid Beta Oxidation; Mitochondrial LC-Fatty Acid Beta-Oxidation			2	0	0.01	1.62313e-16			148.3								312573						1	1
NP_001269163.1	proteasome subunit alpha type-6 isoform c [OS=Homo sapiens]	0	77.614	44	9	71	9	227	25.3	7.11	159.92	9	Pf00227	5687	PSMA6	14	ENSG00000100902.10	Proteasome Degradation			1	0	1.025	0.940341	20.73	101.7	101	5.72	3.78	9.20623e+07	7.5123e+07	7.80575e+07	7.67961e+07	7.71683e+07	8.04428e+07	9	9	9	9	9	9	1
NP_788955.1	proteasome activator complex subunit 1 isoform 2 [OS=Homo sapiens]	0	61.033	44	11	57	11	250	28.6	6.71	77.11	11	Pf02251, Pf02252	5720	PSME1	14	ENSG00000092010.14	Proteasome Degradation			1	0	1.311	0.541951	44.3	112.8	92.6	3	17.07	7.71126e+07	6.75656e+07	7.72227e+07	6.9777e+07	5.73335e+07	4.82371e+07	10	10	10	10	9	8	1
AAH11885.1	Eukaryotic translation initiation factor 2A, 65kDa [OS=Homo sapiens]	0	134.325	44	15	107	15	585	64.9	8.97	237.87	15	Pf08662	83939	EIF2A	3		Photodynamic therapy-induced unfolded protein response; VEGFA-VEGFR2 Signaling Pathway			2	0	1.074	0.996917	28.84	107.6	97.1	3.78	6.44	9.85768e+07	8.32811e+07	8.67844e+07	7.92411e+07	6.94089e+07	7.73e+07	15	15	15	15	15	15	1	Met-loss [N-Term]
NP_036220.1	6-phosphogluconolactonase [OS=Homo sapiens]	0	35.907	44	7	27	7	258	27.5	6.05	48.55	7	Pf01182	25796	PGLS	19	ENSG00000130313.6	Pentose Phosphate Pathway	Carbon metabolism; Metabolic pathways; Pentose phosphate pathway	Pentose phosphate pathway (hexose monophosphate shunt)	7	0	0.857	0.466085	37.52	94.2	107.4	13.86	2.16	2.73556e+07	1.97015e+07	2.00101e+07	2.36859e+07	2.25788e+07	2.33889e+07	7	6	5	7	6	7	1
EAW98517.1	RAN, member RAS oncogene family, isoform CRA_c [OS=Homo sapiens]	0	185.547	44	14	134	14	233	26.2	7.01	359.4	14	Pf00025, Pf00071, Pf08477	5901	RAN	12	ENSG00000132341.11	Androgen receptor signaling pathway; miRNA Biogenesis			2	0	0.928	0.72985	38.28	99	103.5	11.29	3.72	6.5302e+08	4.69937e+08	5.14446e+08	5.35894e+08	5.1065e+08	4.84107e+08	14	13	13	14	14	14	1	Met-loss+Acetyl [N-Term]
BAG37895.1	unnamed protein product [OS=Homo sapiens]	0	93.291	44	8	62	7	240	26.8	4.67	130.4	8	Pf00855	3068	HDGF	1					0	1	0.94	0.761687	30.54	90.7	111.8	22.55	8.07	1.3508e+08	8.27406e+07	8.71611e+07	1.1412e+08	1.05333e+08	9.44765e+07	8	8	8	8	8	8	1
AAD43442.1	26S proteasome subunit P40.5 [OS=Homo sapiens]	0	91.579	44	13	47	13	376	42.9	5.81	96.05	13	Pf01399	5719	PSMD13	11		Proteasome Degradation; Parkin-Ubiquitin Proteasomal System pathway			2	0	1.057	0.982744	29.17	104	94.7	2.24	4.13	6.21398e+07	5.58011e+07	61671828	5.29078e+07	5.59488e+07	5.20899e+07	11	11	11	11	11	11	1
NP_001124182.1	U6 snRNA-associated Sm-like protein LSm5 isoform b [OS=Homo sapiens]	0	6.049	44	2	2	2	62	6.8	4.28	6.08	2	Pf01423	23658	LSM5	7	ENSG00000106355.9				0	0	1.254	0.941066	12.05	116.5	92.9	29.82		97623.8	145247	170800			118819	1	1	1			1	1
EAW48944.1	hCG1640785, isoform CRA_a [OS=Homo sapiens]	0	37.272	44	7	55	7	124	13.6	9.99	60.7	7	Pf03297	401206	RPS25P6	5					0	0	1.183	0.830899	26.32	104.7	92.9	6.58	1.91	2.73263e+08	2.63575e+08	2.53848e+08	2.28158e+08	2.153e+08	2.17014e+08	7	7	7	7	7	7	1
XP_016884379.1	PREDICTED: ran-specific GTPase-activating protein isoform X1 [OS=Homo sapiens]	0	102.488	44	9	65	9	271	30.9	6.68	184.73	9	Pf00638	5902	RANBP1	22					0	0	0.932	0.740977	33.36	76.1	108.1	10.01	7.58	1.41704e+08	1.16751e+08	1.53843e+08	2.1055e+08	1.81636e+08	1.79911e+08	8	8	9	8	9	8	1	Met-loss+Acetyl [N-Term]
BAG61164.1	unnamed protein product [OS=Homo sapiens]	0	98.209	43	10	451	3	166	18	10.32	477.56	10	Pf00125, Pf00808	440689	HIST2H2BF	1					0	6	0.956	0.80166	41.94	95.5	101	11.56	6.8	9.81813e+08	1.07865e+09	1.03312e+09	9.83834e+08	1.03848e+09	1.09698e+09	9	8	8	9	9	7	1
AAV38495.1	Proteasome (Prosome, macropain) 26S subunit, non-ATPase, 10 [OS=Homo sapiens]	0	42.855	43	5	19	5	226	24.4	6.1	38.39	5	Pf00023, Pf12796, Pf13606, Pf13637, Pf13857	5716	PSMD10	X		Proteasome Degradation; Parkin-Ubiquitin Proteasomal System pathway			2	0	1.096	0.970674	27.46	106.1	95.6	24.81	11.73	1.76109e+07	9.95883e+06	11486055	9.62888e+06	9.82642e+06	1.16148e+07	5	4	5	4	4	5	1
AAH08435.1	Peroxiredoxin 3 [OS=Homo sapiens]	0	81.75	43	9	64	9	256	27.7	7.5	135.26	9	Pf00578, Pf08534, Pf10417, Pf13905	10935	PRDX3	10		Selenium Micronutrient Network			1	0	1.105	0.965954	35.09	105.1	96.1	6.94	9.5	1.04055e+08	8.00612e+07	8.87075e+07	6.78069e+07	7.98537e+07	7.64992e+07	9	9	9	9	9	9	1
EAW97549.1	small nuclear ribonucleoprotein polypeptide F, isoform CRA_b [OS=Homo sapiens]	0	12.741	43	3	14	1	67	7.7	4.41	32.34	3	Pf01423	6636	SNRPF	12		mRNA Processing			1	2	1.024	0.939474	13.87	102.6	100.8	49.66	1.49	15051027	4.00948e+07	42519597	4.04989e+07	4.04585e+07	3.90026e+07	2	3	3	3	3	3	1
NP_005057.1	splicing factor, proline- and glutamine-rich [OS=Homo sapiens]	0	328.428	43	28	227	27	707	76.1	9.44	520.97	28	Pf00076, Pf08075, Pf13893, Pf14259	6421	SFPQ	1	ENSG00000116560.10	mRNA Processing		PTK6 Regulates Proteins Involved in RNA Processing	5	0	1.079	0.988613	46.17	95.4	94.5	5.33	10.97	3.66032e+08	3.46067e+08	3.85233e+08	3.61295e+08	2.91451e+08	3.53018e+08	24	26	25	25	25	26	1
NP_004388.2	Probable ATP-dependent RNA helicase DDX6 [OS=Homo sapiens]	0	115.102	43	13	68	13	483	54.4	8.66	130.58	13	Pf00270, Pf00271, Pf14617	1656	DDX6	11	ENSG00000110367.11		RNA degradation	mRNA decay by 5' to 3' exoribonuclease	4	0	0.965	0.81608	41.15	100.4	99	10.47	9.72	6.50148e+07	4.6828e+07	5.27817e+07	4.2639e+07	4.99421e+07	4.91016e+07	12	11	12	11	11	11	1
CAG33013.1	PTK9L [OS=Homo sapiens]	0	118.847	43	10	58	10	349	39.6	6.84	215.55	10	Pf00241	11344	TWF2	3					0	0	1.061	0.987648	40.47	102.8	96.9	7.49	1.29	4.22158e+07	4.10944e+07	4.64184e+07	4.0412e+07	4.06358e+07	3.975e+07	9	10	10	10	10	10	1	Met-loss+Acetyl [N-Term]
AAH00338.1	Psmd7 protein, partial [OS=Homo sapiens]	0	116.819	43	11	76	11	326	37.3	8.72	210.19	11	Pf01398, Pf13012	5713	PSMD7	16		Proteasome Degradation; Parkin-Ubiquitin Proteasomal System pathway			2	0	1.033	0.953381	26.15	104.6	95	8.76	5.24	8.13629e+07	5.96196e+07	7.06241e+07	5.98516e+07	6.09479e+07	6.45429e+07	11	10	10	11	10	10	1
NP_004334.1	Calreticulin precursor [OS=Homo sapiens]	0	165.317	43	14	165	14	417	48.1	4.44	440.28	14	Pf00262	811	CALR	19	ENSG00000179218.13	Androgen receptor signaling pathway; Photodynamic therapy-induced unfolded protein response; Calcium Regulation in the Cardiac Cell	Antigen processing and presentation; Protein processing in endoplasmic reticulum; Phagosome; Chagas disease (American trypanosomiasis); HTLV-I infection	Scavenging by Class F Receptors; Assembly of Viral Components at the Budding Site; ATF6 (ATF6-alpha) activates chaperone genes; Antigen Presentation: Folding, assembly and peptide loading of class I MHC; ER-Phagosome pathway; Calnexin/calreticulin cycle; Scavenging by Class A Receptors	32	0	1.156	0.885136	40.51	114.6	97.5	6.31	4.14	3.46283e+08	2.78985e+08	2.90659e+08	245927213	2.45282e+08	2.58715e+08	14	14	14	14	14	14	1
CAG33214.1	PSMA3 [OS=Homo sapiens]	0	77.582	43	10	70	10	255	28.4	5.33	128.94	10	Pf00227, Pf10584	5684	PSMA3	14		Proteasome Degradation			1	0	1.169	0.857829	20.53	105.6	96.3	2.64	2.52	1.20777e+08	1.09728e+08	1.13582e+08	1.01412e+08	9.60273e+07	1.00149e+08	9	9	9	10	10	10	1
EAW53296.1	S100 calcium binding protein A13, isoform CRA_a, partial [OS=Homo sapiens]	0	15.526	43	3	8	3	51	5.8	4.72	17.93	3	Pf01023	6284	S100A13	1					0	0	1.611	0.100566	74.54	125.2	92.4	9.49	11.77	5.49899e+06	4.02862e+06	5.15502e+06	3.6874e+06	4.17897e+06	3.297e+06	2	3	3	2	2	3	1
CAA77753.1	40 kDa protein kinase [OS=Homo sapiens]	0	68.644	43	9	39	7	348	40.4	7.15	123.54	9	Pf00069, Pf01636, Pf07714	5594	MAPK1	22		IL-5 Signaling Pathway; Osteopontin Signaling; Regulation of toll-like receptor signaling pathway; Physiological and Pathological Hypertrophy of the Heart; MicroRNAs in cardiomyocyte hypertrophy; Heart Development; Integrin-mediated Cell Adhesion; IL-1 signaling pathway; Integrated Breast Cancer Pathway; RANKL/RANK (Receptor activator of NFKB (ligand)) Signaling Pathway; Human Thyroid Stimulating…			56	2	1.187	0.823082	24.8	108.1	87.9	6.68	3.36	2.62597e+07	2.46037e+07	2.8504e+07	2.10486e+07	2.18747e+07	2.05168e+07	8	8	7	7	7	7	1
AAH37545.1	Poly (ADP-ribose) polymerase 1 [OS=Homo sapiens]	0	307.855	43	34	235	34	1014	113	8.88	424.82	34	Pf00533, Pf00644, Pf00645, Pf02877, Pf05406, Pf08063	142	PARP1	1		Corticotropin-releasing hormone signaling pathway; Fas Ligand (FasL) pathway and Stress induction of Heat Shock Proteins (HSP) regulation			2	0	1.05	0.971923	29.56	100.9	101.3	7.13	4.1	2.71299e+08	2.07444e+08	2.31705e+08	2.3193e+08	2.21173e+08	2.0805e+08	31	32	31	32	32	32	1	Met-loss+Acetyl [N-Term]
XP_016859678.1	PREDICTED: septin-2 isoform X1 [OS=Homo sapiens]	0	122.748	43	13	75	13	441	50.8	7.46	222.65	13	Pf00071, Pf00735, Pf01926, Pf13900	4735	SEPT2	2					0	0	1.192	0.813619	31.12	96.5	96.5	2.52	5.89	7.97931e+07	7.15079e+07	7.96773e+07	7.06488e+07	7.39278e+07	7.73337e+07	10	11	10	11	10	12	1
AAH68199.1	SLC25A5 protein, partial [OS=Homo sapiens]	0	172.991	43	20	183	8	323	35.3	9.82	352.58	20	Pf00153	292	SLC25A5	X		Electron Transport Chain	Parkinson's disease; Calcium signaling pathway; cGMP-PKG signaling pathway; Huntington's disease; HTLV-I infection		6	12	1.133	0.917181	23.89	100.3	105.9	18.95	11.91	7.36731e+08	4.83983e+08	4.98488e+08	4.8501e+08	6.02285e+08	5.24389e+08	18	18	17	16	16	17	1
BAD96916.1	proteasome 26S non-ATPase subunit 11 variant, partial [OS=Homo sapiens]	0	144.914	43	16	114	16	423	47.5	6.48	213.03	16	Pf01399	5717	PSMD11	17		Proteasome Degradation; Parkin-Ubiquitin Proteasomal System pathway			2	0	1.193	0.81183	22.67	121.2	81.8	10.39	4.86	3.54844e+08	2.81398e+08	2.73418e+08	2.00312e+08	1.87673e+08	2.05264e+08	16	16	15	15	16	15	1	Met-loss+Acetyl [N-Term]
AAC33433.1	histone macroH2A1.2 [OS=Homo sapiens]	0	181.506	43	14	157	12	372	39.6	9.79	469.72	14	Pf00125, Pf01661	9555	H2AFY	5					0	2	1.083	0.98596	22.59	108.1	90.5	6.27	8.55	2.53753e+08	2.12864e+08	2.12805e+08	1.76975e+08	1.8417e+08	2.0349e+08	14	13	14	12	12	14	1
AAA36399.1	Phosphatase 2a regulatory subunit [OS=Homo sapiens]	0	188.059	43	21	103	17	589	65.2	5.08	266.44	21	Pf02985, Pf13513, Pf13646	5518	PPP2R1A	19		Wnt Signaling Pathway and Pluripotency; Glycogen Metabolism			2	4	1.202	0.80166	28.03	117.3	86.8	3.24	5.45	2.45323e+08	2.00821e+08	2.24466e+08	1.7584e+08	1.56356e+08	1.56657e+08	19	20	20	17	17	21	1
AAV38639.1	ATP synthase, H+ transporting, mitochondrial F1 complex, O subunit (oligomycin sensitivity conferring protein) [OS=Homo sapiens]	0	45.67	43	7	29	7	213	23.3	9.99	53.81	7	Pf00213	539	ATP5O	21		Electron Transport Chain; Oxidative phosphorylation			2	0	1.261	0.674484	22.61	106.9	85	5.44	4.79	5.34359e+07	4.24747e+07	4.62828e+07	38481053	3.4958e+07	3.43175e+07	6	6	6	6	6	6	1
AAA36633.1	spermidine synthase [OS=Homo sapiens]	0	47.981	43	8	30	1	302	33.8	5.38	58.58	8	Pf01564, Pf13659, Pf13847	6723	SRM	1		Nucleotide Metabolism; Urea cycle and metabolism of amino groups			2	0	1.169	0.974789	109.9	162.5	82.1	122.71	128.52		4.20165e+06	323769	595673	3.95427e+06	245438		1	1	1	1	1	1
NP_003744.1	Eukaryotic translation initiation factor 3 subunit D [OS=Homo sapiens]	0	135.121	43	16	103	16	548	63.9	6.05	266.07	16	Pf05091	8664	EIF3D	22	ENSG00000100353.17	Translation Factors	RNA transport	Formation of the ternary complex, and subsequently, the 43S complex; L13a-mediated translational silencing of Ceruloplasmin expression; Translation initiation complex formation; GTP hydrolysis and joining of the 60S ribosomal subunit; Formation of a pool of free 40S subunits; Ribosomal scanning and start codon recognition	13	0	0.981	0.852301	25.64	99.5	101	4.7	5.42	6.61955e+07	6.05681e+07	5.99599e+07	6.65914e+07	5.87852e+07	6.02019e+07	15	15	15	15	15	15	1
NP_006383.2	Nucleolar protein 56 [OS=Homo sapiens]	0	202.151	43	18	133	18	594	66	9.19	303.43	18	Pf01798, Pf08060, Pf08156	10528	NOP56	20	ENSG00000101361.16		Ribosome biogenesis in eukaryotes	Major pathway of rRNA processing in the nucleolus and cytosol; Association of TriC/CCT with target proteins during biosynthesis; rRNA modification in the nucleus and cytosol	10	0	0.962	0.806559	31.97	97.5	95.1	9.18	16.08	1.61198e+08	1.21155e+08	1.30409e+08	161680365	1.22107e+08	1.19533e+08	17	15	16	17	17	17	1
XP_016873329.1	PREDICTED: platelet-activating factor acetylhydrolase IB subunit beta isoform X1 [OS=Homo sapiens]	0	68.429	43	5	52	3	242	27.1	6.28	164.78	5	Pf00657, Pf13472	5049	PAFAH1B2	11					0	2	1.716	0.0335005	65.09	128.3	77.6	8.09	24.25	2.60029e+07	1.96763e+07	2.47281e+07	9.56374e+06	1.41766e+07	1.51614e+07	5	5	5	5	4	5	1
NP_006641.1	complexin-2 [OS=Homo sapiens]	0	22.98	43	4	19	4	134	15.4	5.08	19.29	4	Pf05835	10814	CPLX2	5	ENSG00000145920.14	Synaptic Vesicle Pathway	Synaptic vesicle cycle		2	0	0.803	0.280438	39.81	100.6	118	19.7	16.15	1.78787e+07	2.18035e+07	2.5013e+07	2.03468e+07	2.71082e+07	2.62353e+07	3	3	3	4	4	3	1	Acetyl [N-Term]
NP_001008709.1	serine/threonine-protein phosphatase PP1-alpha catalytic subunit isoform 3 [OS=Homo sapiens]	0	132.953	43	13	103	4	341	38.6	6.62	256.37	13	Pf00149	5499	PPP1CA	11	ENSG00000172531.14	Nicotine Activity on Dopaminergic Neurons; Common Pathways Underlying Drug Addiction			2	9	1.145	0.899638	36.41	103	104.9	5.57	2.84	1.34138e+08	1.05842e+08	1.16644e+08	1.09737e+08	1.12916e+08	1.12296e+08	12	12	12	12	11	11	1	Met-loss+Acetyl [N-Term]
AAH96170.1	Histone cluster 1, H1e [OS=Homo sapiens]	0	220.221	42	17	229	5	219	21.9	11.03	520.13	17	Pf00538	3008	HIST1H1E	6					0	12	0.99	0.876994	34.11	104.4	97.2	10.46	4.54	1.32825e+09	1.43118e+09	1.42222e+09	1.28283e+09	1.23787e+09	1.33702e+09	20	19	18	18	17	17	1	Met-loss [N-Term]; Met-loss+Acetyl [N-Term]
CAA43795.1	colligin [OS=Homo sapiens]	0	154.649	42	13	88	1	417	46.2	8.28	283.11	13	Pf00079	871	SERPINH1	11		Endochondral Ossification			1	0	0.769	0.183971	24.38	100	130	22.52	31.4	8.28505e+06	10842840	1.21925e+07	8.28599e+06	14568873	15295127	1	1	1	1	1	1	1
BAD92985.1	spectrin, beta, non-erythrocytic 1 isoform 1 variant, partial [OS=Homo sapiens]	0	556.298	42	74	396	73	2377	276	5.53	900.44	74	Pf00169, Pf00307, Pf00435, Pf11971, Pf12128, Pf15410	6711	SPTBN1	2		TGF-beta Signaling Pathway			1	1	1.153	0.890905	30.62	112.9	91.9	3.62	6.27	4.43426e+08	4.09036e+08	4.51153e+08	3.23837e+08	3.59552e+08	3.41348e+08	66	65	67	65	64	66	1
NP_004716.1	mitotic checkpoint protein BUB3 isoform a [OS=Homo sapiens]	0	70.554	42	11	45	11	328	37.1	6.84	101.02	11	Pf00400, Pf04762	9184	BUB3	10	ENSG00000154473.17	Cell Cycle	HTLV-I infection; Cell cycle	Inactivation of APC/C via direct inhibition of the APC/C complex; Amplification of signal from unattached kinetochores via a MAD2 inhibitory signal; Separation of Sister Chromatids; Resolution of Sister Chromatid Cohesion; RHO GTPases Activate Formins; Cdc20:Phospho-APC/C mediated degradation of Cyclin A; APC-Cdc20 mediated degradation of Nek2A	29	0	1.086	0.983413	24.83	106.2	91.7	5.97	5.37	76469638	5.93502e+07	6.7527e+07	6.09865e+07	53946416	5.50001e+07	9	11	10	10	9	11	1	Met-loss [N-Term]
BAA03941.1	enoyl-CoA hydratase/3-hydroxyacyl-CoA dehydrogenase alpha-subunit of trifunctional protein [OS=Homo sapiens]	0	258.204	42	28	166	28	763	82.9	9.04	425.07	28	Pf00378, Pf00725, Pf02737	3030	HADHA	2		Fatty Acid Beta Oxidation; Mitochondrial LC-Fatty Acid Beta-Oxidation; Sudden Infant Death Syndrome (SIDS) Susceptibility Pathways			3	0	1.127	0.926059	30.74	105	90.5	3.78	7.84	2.1895e+08	1.77618e+08	1.97711e+08	1.57869e+08	1.79914e+08	1.60714e+08	26	27	27	25	25	25	1
NP_001184222.1	Dihydropyrimidinase-related protein 2 isoform 1 [OS=Homo sapiens]	0	237.451	42	19	145	8	677	73.5	6.35	443.29	19	Pf01979, Pf07969, Pf13147, Pf13594	1808	DPYSL2	8	ENSG00000092964.17	Regulation of Microtubule Cytoskeleton; Brain-Derived Neurotrophic Factor (BDNF) signaling pathway			2	11	0.975	0.839232	21.46	98	99.6	12.37	6.13	2.06242e+08	2.22511e+08	2.47048e+08	2.15828e+08	2.33595e+08	2.35552e+08	18	19	18	18	18	18	1
NP_060377.1	ragulator complex protein LAMTOR1 [OS=Homo sapiens]	0	27.056	42	4	20	4	161	17.7	5.15	46.94	4	Pf15454	55004	LAMTOR1	11	ENSG00000149357.9		mTOR signaling pathway	Energy dependent regulation of mTOR by LKB1-AMPK; Neutrophil degranulation; Regulation of PTEN gene transcription; mTORC1-mediated signalling; TP53 Regulates Metabolic Genes; Macroautophagy	19	0	1.083	0.986889	37.98	98.2	93	17.56	7.75	12343928	7.54435e+06	1.01737e+07	8.80054e+06	9.15837e+06	9973507	4	4	4	4	4	4	1
NP_003748.1	Eukaryotic translation initiation factor 3 subunit I [OS=Homo sapiens]	0	104.329	42	12	84	12	325	36.5	5.64	138.93	12	Pf00400	8668	EIF3I	1	ENSG00000084623.11	Translation Factors	RNA transport	Formation of the ternary complex, and subsequently, the 43S complex; L13a-mediated translational silencing of Ceruloplasmin expression; Translation initiation complex formation; GTP hydrolysis and joining of the 60S ribosomal subunit; Formation of a pool of free 40S subunits; Ribosomal scanning and start codon recognition	13	0	1.061	0.986691	31.5	103.1	90.1	0.44	8.61	1.52503e+08	1.33997e+08	1.44499e+08	1.36149e+08	1.12634e+08	1.19396e+08	11	11	11	11	11	11	1
NP_036590.1	mitochondrial import inner membrane translocase subunit TIM13 [OS=Homo sapiens]	0	28.483	42	3	23	3	95	10.5	8.18	55.04	3	Pf02953	26517	TIMM13	19	ENSG00000099800.7			Mitochondrial protein import; Metabolism of proteins	2	0	1.154	0.890519	36.21	115.1	76.2	13.72	19.96	56245391	4.21029e+07	4.06871e+07	40477581	2.82824e+07	2.85677e+07	3	3	3	3	3	3	1
AAF67013.1	VAMP-associated 33 kDa protein [OS=Homo sapiens]	0	65.72	42	9	48	8	243	27.1	7.78	103.21	9	Pf00635, Pf00843	9217	VAPB	20					0	0	0.949	0.786309	25.57	105.5	98.9	16.61	4.12	7.98236e+07	5.86983e+07	5.43585e+07	6.1291e+07	5.68777e+07	55032560	8	7	7	7	7	7	1	Met-loss+Acetyl [N-Term]
BAD92832.1	DEAD box polypeptide 17 isoform p82 variant, partial [OS=Homo sapiens]	0	192.225	42	29	180	22	737	81	7.93	355.77	29	Pf00270, Pf00271	10521	DDX17	22					0	7	1.062	0.988004	33.2	110	91.7	6.24	1.43	2.9638e+08	2.88154e+08	3.14879e+08	2.48451e+08	2.48084e+08	2.48631e+08	26	28	29	29	29	29	1
NP_003783.1	Endothelial differentiation-related factor 1 isoform alpha [OS=Homo sapiens]	0	49.794	42	6	38	6	148	16.4	9.95	74.5	6	Pf01381, Pf08523, Pf12844, Pf13560	8721	EDF1	9	ENSG00000107223.12				0	0	0.973	0.834567	26.27	98.8	103.5	11.95	6.95	3.11554e+07	33354133	37022522	3.68539e+07	3.79834e+07	3.28228e+07	4	5	5	6	6	5	1
AAQ13495.1	FWP004 [OS=Homo sapiens]	0	69.196	42	11	113	11	203	23.6	11.02	178.72	11	Pf00572		RPL13AP25						0	0	1.15	0.890905	31.36	101.5	94.9	7.62	3.08	3.1929e+08	2.49261e+08	2.62929e+08	2.47682e+08	2.2921e+08	2.39074e+08	10	10	10	10	9	10	1	Met-loss+Acetyl [N-Term]
AAA85659.1	ribosomal protein S9 [OS=Homo sapiens]	0	67.282	42	13	95	13	194	22.6	10.74	189.63	13	Pf00163, Pf01479	6203	RPS9	19		Cytoplasmic Ribosomal Proteins			1	0	1.137	0.91118	23.95	108.8	95.4	4.84	3.7	3.61005e+08	2.89812e+08	3.15919e+08	2.8526e+08	2.6338e+08	2.59579e+08	13	13	13	13	13	13	1
BAD96302.1	PKCI-1-related HIT protein variant, partial [OS=Homo sapiens]	0	31.092	42	4	19	4	163	17.2	9.48	56.47	4	Pf01230, Pf11969	84681	HINT2	9					0	0	1.513	0.162715	59.18	145.7	15.7	26.04	102.49	1.21199e+07	1.65848e+07	1.95057e+07	1.8805e+06	9.43188e+06	1.67321e+06	3	4	4	4	4	3	1
AAA85336.1	Transmembrane protein [OS=Homo sapiens]	0	274.768	42	25	167	25	758	83.6	6.48	419.25	25	Pf07227, Pf09731	10989	IMMT	2					0	0	1.177	0.83995	42.5	97.9	95	5.46	6.78	1.58794e+08	1.33645e+08	1.35288e+08	1.26031e+08	1.41477e+08	1.32934e+08	22	22	22	24	24	24	1
AAH03667.1	ribosomal protein S27-like [OS=Homo sapiens]	0	21.511	42	4	26	1	84	9.5	9.11	38.99	4	Pf01667	51065	RPS27L	15					0	0	1.532	0.627791	13.87	124.3	81.1	17.86	7.05	1.04809e+06	1.21596e+06	1.41993e+06	765182	820054	856869	1	1	1	1	1	1	1
EAW99923.1	RAB1A, member RAS oncogene family, isoform CRA_f [OS=Homo sapiens]	0	74.845	42	9	40	4	257	28.1	8.57	119.26	9	Pf00009, Pf00025, Pf00071, Pf01926, Pf04670, Pf08477, Pf09439	5861	RAB1A	2					0	4	1.027	0.941295	22.19	100.8	94.6	7.75	4.25	9.80025e+07	7.57142e+07	8.09408e+07	7.49712e+07	7.89789e+07	7.28618e+07	7	7	6	7	7	6	1
EAW65344.1	ADP-ribosylation factor 4, partial [OS=Homo sapiens]	0	48.864	42	5	38	2	161	18.3	5.17	109.32	5	Pf00025, Pf00071, Pf00503, Pf01926, Pf04670, Pf08477, Pf09439	378	ARF4	3					0	0	0.802	0.2753	31.17	97.5	111	10.03	5.99	4.26977e+07	4.53415e+07	4.35183e+07	4.80498e+07	4.79786e+07	4.25126e+07	2	2	2	2	2	2	1
AAH66306.1	SMT3 suppressor of mif two 3 homolog 1 (S. cerevisiae) [OS=Homo sapiens]	0	29.133	42	3	37	3	101	11.5	5.29	70.47	3	Pf00240, Pf11976	7341	SUMO1	2		Androgen receptor signaling pathway; TP53 Network; TGF-beta Signaling Pathway; Exercise-induced Circadian Regulation			4	0	1.055	0.979857	20.06	105.3	92.5	12.18	13.43	3.464e+07	3.78797e+07	4.06955e+07	3.01289e+07	3.86711e+07	3.37048e+07	3	3	3	3	3	3	1	Met-loss+Acetyl [N-Term]
BAF84412.1	unnamed protein product [OS=Homo sapiens]	0	317.437	42	29	241	29	760	84.8	6.61	658.4	29	Pf02225, Pf04253, Pf04389	7037	TFRC	3					0	0	0.891	0.599255	40.32	88.7	97.2	22.53	11.22	2.96374e+08	1.69019e+08	2.09112e+08	2.66368e+08	2.17696e+08	2.1312e+08	25	25	26	26	25	25	1
ACO54885.1	REG gamma-3 variant [OS=Homo sapiens]	0	49.492	42	8	52	6	231	26.9	5.94	94.44	8	Pf02251, Pf02252	10197	PSME3	17	ENSG00000131467.10	Proteasome Degradation			1	2	1.07	0.997632	17.88	103.5	96.9	4.8	5.12	9.1717e+07	7.42394e+07	79791300	6.71358e+07	7.18433e+07	7.16213e+07	8	8	8	7	7	8	1	Met-loss+Acetyl [N-Term]
BAG35060.1	unnamed protein product [OS=Homo sapiens]	0	131.036	42	8	380	2	130	14.1	11.06	557.35	8	Pf00125, Pf00808	8969	HIST1H2AG	6			Systemic lupus erythematosus; Alcoholism		2	6	0.955	0.80014	24.65	95.5	108.2	7.77	5.93	3.24547e+09	3.18308e+09	3.58426e+09	3.98392e+09	3.46846e+09	3.69964e+09	8	8	8	8	7	7	1
NP_003503.1	Histone H2A type 1-C [OS=Homo sapiens]	0	131.561	42	8	309	2	130	14.1	11.05	452.78	8	Pf00125, Pf00808	8334	HIST1H2AC	6	ENSG00000180573.9		Alcoholism; Systemic lupus erythematosus	SIRT1 negatively regulates rRNA expression; UCH proteinases; RMTs methylate histone arginines; Activation of anterior HOX genes in hindbrain development during early embryogenesis; NoRC negatively regulates rRNA expression; Meiotic synapsis; Transcriptional regulation by small RNAs; Meiotic recombination; PRC2 methylates histones and DNA; HDACs deacetylate histones; Formation of the beta-catenin:…	66	0	1.05	0.971923	13.67	99.2	94.6	10.09	4.87	2.88864e+08	3.08329e+08	3.00643e+08	2.77879e+08	2.67166e+08	2.90578e+08	2	2	2	2	2	2	1
NP_001287847.1	high mobility group protein HMGI-C isoform c [OS=Homo sapiens]	0	52.989	42	5	27	5	118	12.7	11.75	108.84	5		8091	HMGA2	12	ENSG00000149948.13	Mesodermal Commitment Pathway			1	0	1.183	0.830899	34.85	117.2	76.6	4.72	5.63	3.25117e+07	2.67486e+07	28140272	1.98918e+07	1.74857e+07	1.79443e+07	4	4	3	4	4	4	1	Met-loss+Acetyl [N-Term]
BAD92022.1	phosphoribosylglycinamide formyltransferase, phosphoribosylglycinamide synthetase, phosphoribosylaminoimidazole synthetase isoform 1 variant, partial [OS=Homo sapiens]	0	306.265	41	28	175	28	1046	112.1	7.36	516.46	28	Pf00551, Pf00586, Pf01071, Pf02222, Pf02655, Pf02769, Pf02843, Pf02844, Pf03435, Pf07478, Pf08442, Pf08443, Pf13535, Pf15632	2618	GART	21		Folate Metabolism; One Carbon Metabolism			2	0	0.996	0.890905	29.66	95.3	102.6	4.43	2.23	1.81285e+08	1.47603e+08	1.58779e+08	1.67425e+08	1.63987e+08	1.69196e+08	26	26	26	25	25	26	1
NP_001295155.1	40S ribosomal protein S15 isoform 1 [OS=Homo sapiens]	0	72.85	41	5	89	5	152	17.7	10.39	185.2	5	Pf00203	6209	RPS15	19	ENSG00000115268.9	Cytoplasmic Ribosomal Proteins			1	0	1.5	0.175026	28.2	114.5	84.2	17.57	5.94	1.92325e+08	1.19854e+08	1.45682e+08	1.03271e+08	1.01838e+08	1.115e+08	5	4	4	3	4	5	1
EAX05327.1	hCG1990955, isoform CRA_a, partial [OS=Homo sapiens]	0	24.675	41	4	32	4	121	13.2	10.01	67.08	4	Pf00164								0	0	1.108	0.959223	26.96	112.1	81.6	1.21	12.62	2.20127e+08	1.96487e+08	2.09615e+08	172658834	1.32254e+08	1.43858e+08	4	4	4	2	3	3	1
XP_016864369.1	PREDICTED: WD repeat-containing protein 1 isoform X1 [OS=Homo sapiens]	0	167.919	41	19	87	19	659	72	6.9	195.88	19	Pf00400	9948	WDR1	4		Hypertrophy Model			1	0	0.962	0.806695	25.93	93.9	111	5.09	2.89	9.72428e+07	9.19134e+07	1.01703e+08	1.14621e+08	1.18036e+08	1.11497e+08	15	15	16	15	16	15	1
NP_003925.1	Far upstream element-binding protein 3 [OS=Homo sapiens]	0	115.657	41	16	76	14	572	61.6	8.38	139.1	16	Pf00013, Pf07650, Pf13014	8939	FUBP3	9	ENSG00000107164.15				0	0	1.016	0.917292	21.81	102.7	94.9	2.68	11.69	6.64627e+07	5.6712e+07	6.50549e+07	6.65639e+07	5.54168e+07	5.19416e+07	12	13	13	11	11	11	1
EAW71676.1	spermidine synthase, isoform CRA_b [OS=Homo sapiens]	0	55.799	41	8	31	1	313	34.9	5.49	63.73	8	Pf01564	6723	SRM	1		Nucleotide Metabolism; Urea cycle and metabolism of amino groups			2	7	1.055	0.9791	36.39	96.6	98.9	2.38	1.15	3.45327e+07	2.87573e+07	3.18881e+07	3.16677e+07	3.06915e+07	3.11751e+07	7	7	6	8	7	7	1
EAW60315.1	ribosomal protein L3, isoform CRA_f [OS=Homo sapiens]	0	279.335	41	22	246	22	430	48.8	10.27	650.53	22	Pf00297	6122	RPL3	22		Cytoplasmic Ribosomal Proteins			1	0	1.112	0.954045	25.81	106.7	85.7	9.33	4.44	3.88694e+08	2.89402e+08	3.15716e+08	2.64365e+08	2.39227e+08	2.39385e+08	20	20	18	19	18	19	1
EAW87706.1	adenylate kinase 1, isoform CRA_a [OS=Homo sapiens]	0	44.417	41	8	27	8	249	27.3	8.1	51.11	8	Pf00406, Pf01712, Pf06414, Pf13207, Pf13238, Pf13671	203	AK1	9					0	0	1.353	0.437605	34.25	118.8	99.5	10.1	6.86	3.45567e+07	2.62422e+07	2.70839e+07	20537538	2.27099e+07	2.25722e+07	6	6	6	6	6	7	1
NP_075266.1	long-chain-fatty-acid--CoA ligase 4 isoform 2 [OS=Homo sapiens]	0	152.211	41	22	110	21	711	79.1	8.38	292.65	22	Pf00501	2182	ACSL4	X	ENSG00000068366.19	Fatty Acid Beta Oxidation; Fatty Acid Biosynthesis; Mitochondrial LC-Fatty Acid Beta-Oxidation; PPAR signaling pathway	Fatty acid degradation; Fatty acid biosynthesis; Fatty acid metabolism; Metabolic pathways; PPAR signaling pathway; Peroxisome; Adipocytokine signaling pathway	Synthesis of very long-chain fatty acyl-CoAs	16	1	1.148	0.893222	27.43	105.5	85.6	8.45	5.92	8.45297e+07	6.85672e+07	6.7744e+07	5.87048e+07	6.34348e+07	5.67545e+07	22	20	18	19	19	17	1
BAD97172.1	SAR1a gene homolog 2 variant, partial [OS=Homo sapiens]	0	28.829	41	5	21	2	198	22.4	6.11	20.82	5	Pf00025, Pf00503, Pf01926, Pf08477, Pf09439	51128	SAR1B	5					0	0	1.298	0.893414	0	132.1	59.5	47.07		1.55058e+06	547761	826964		354063		2	1	1		1		1
CAA56074.1	translation initiation factor [OS=Homo sapiens]	0	143.422	41	21	99	17	411	46.8	6.47	181.05	21	Pf00270, Pf00271	9775	EIF4A3	17					0	0	0.982	0.85531	42.28	98.9	99.2	8.97	0.51	1.88763e+08	1.86483e+08	2.14183e+08	1.9726e+08	1.91933e+08	1.92435e+08	14	15	15	15	15	16	1	Met-loss+Acetyl [N-Term]
EAW76674.1	PDGFA associated protein 1, isoform CRA_a [OS=Homo sapiens]	0	115.899	41	12	74	12	184	20.6	8.88	192.16	12	Pf10252	11333	PDAP1	7					0	0	0.984	0.862287	21.62	100.9	95.2	4.66	9.56	8.67623e+07	7.00823e+07	7.59268e+07	8.02442e+07	6.58845e+07	6.77863e+07	12	11	11	12	10	11	1
NP_000393.4	Glucose-6-phosphate 1-dehydrogenase isoform a [OS=Homo sapiens]	0	138.113	41	15	77	15	545	62.4	8.05	158.51	15	Pf00479, Pf02781	2539	G6PD	X	ENSG00000160211.15	Glutathione metabolism; Pentose Phosphate Pathway; Cori Cycle; NRF2 pathway; ATM Signaling Network in Development and Disease; Sulfation Biotransformation Reaction			6	0	0.915	0.683772	29.59	96.2	106.6	9.99	5.68	1.21744e+08	8.98842e+07	9.757e+07	1.03628e+08	1.02908e+08	1.11741e+08	12	13	12	12	13	13	1
BAH12875.1	unnamed protein product [OS=Homo sapiens]	0	64.225	41	5	44	1	194	22.3	6.54	130.36	5	Pf01997	7247	TSN	2					0	0	1.122	0.938359	11.45	99.7	88.9	3.55	9.78	1.60913e+07	1.5029e+07	1.55267e+07	1.48925e+07	1.20086e+07	13049755	1	1	1	1	1	1	1
EAW76220.1	integrin beta 4 binding protein, isoform CRA_b [OS=Homo sapiens]	0	112.582	41	6	81	6	258	28.2	4.94	291.78	6	Pf01912	3692	EIF6	20		Translation Factors			1	0	0.873	0.529789	27.13	94.4	107.8	6.9	8.19	1.36688e+08	1.03971e+08	1.20802e+08	1.46276e+08	1.21783e+08	1.30186e+08	6	6	6	6	6	6	1
NP_001155901.1	programmed cell death 6-interacting protein isoform 2 [OS=Homo sapiens]	0	226.061	41	27	161	27	873	96.7	6.52	312.29	27	Pf03097, Pf08391, Pf13949	10015	PDCD6IP	3	ENSG00000170248.13				0	0	1.051	0.972839	23.8	107.8	94.8	2.81	5.22	203077268	1.71654e+08	1.82353e+08	1.4597e+08	1.56005e+08	1.56356e+08	26	26	26	25	25	26	1	Met-loss+Acetyl [N-Term]
NP_057018.1	Nucleolar protein 58 [OS=Homo sapiens]	0	158.065	41	21	113	21	529	59.5	8.92	246.56	21	Pf01798, Pf08060, Pf08156	51602	NOP58	2	ENSG00000055044.10		Ribosome biogenesis in eukaryotes	Major pathway of rRNA processing in the nucleolus and cytosol; rRNA modification in the nucleus and cytosol; SUMOylation of RNA binding proteins	11	0	0.948	0.784329	31.28	96.8	105.2	7	8.71	1.44708e+08	1.11717e+08	1.22515e+08	1.46716e+08	1.22237e+08	1.25638e+08	18	18	18	19	18	20	1
EAW98136.1	hCG2016250, isoform CRA_k [OS=Homo sapiens]	0	100.501	41	11	133	11	293	31.3	10.24	221.12	11	Pf00333, Pf03719	100130562	RPS2P5	12					0	0	0.981	0.851995	19.82	101	95.7	4.63	2.28	4.59006e+08	3.85492e+08	3.97318e+08	3.99761e+08	3.75958e+08	3.74805e+08	9	9	10	10	10	11	1
NP_061322.2	Matrin-3 isoform a [OS=Homo sapiens]	0	240.683	41	24	183	24	847	94.6	6.25	452.02	24	Pf00076, Pf13893, Pf14259	9782	MATR3	5	ENSG00000015479.18; ENSG00000280987.4				0	0	1.162	0.874018	31.25	114.5	86	5.58	7.01	2.64227e+08	2.22265e+08	2.24587e+08	1.88614e+08	160631295	1.71398e+08	22	20	21	18	19	23	1
BAD93059.1	ADP,ATP carrier protein, liver isoform T2 variant, partial [OS=Homo sapiens]	0	122.861	41	16	147	4	323	35.4	9.85	239.11	16	Pf00153	293	SLC25A6	X|Y		Electron Transport Chain			1	0	1	0.89225	27.48	107.6	98.2	16.49	10.03	3.07675e+07	2.21016e+07	2.11389e+07	2.12667e+07	2.39169e+07	1.96132e+07	3	3	3	3	3	3	1
NP_001243572.1	leukotriene A-4 hydrolase isoform 2 [OS=Homo sapiens]	0	132.039	41	15	96	1	587	66.8	6.7	220.68	15	Pf01433, Pf09127, Pf13485	4048	LTA4H	12	ENSG00000111144.9	Eicosanoid Synthesis			1	0	0.944	0.831877	59.29	115.7	122.5	6.04	54.47	553493		572404	375172		822295	1		1	1		1	1
NP_734466.1	Histone H2A type 1-A [OS=Homo sapiens]	0	81.386	40	6	192	2	131	14.2	10.86	146.61	6	Pf00125, Pf00808	221613	HIST1H2AA	6	ENSG00000164508.4		Systemic lupus erythematosus; Alcoholism	HDACs deacetylate histones; HATs acetylate histones; UCH proteinases; Ub-specific processing proteases; RMTs methylate histone arginines; Metalloprotease DUBs	13	0	1.502	0.757249	117.17	41.2	27.4	26.78	170.82		92174.1	147089	40228.7	76825.5	1.2435e+07		1	1	1	1	2	1
BAF31287.1	BAT1 protein [OS=Homo sapiens]	0	178.077	40	18	166	7	443	50.6	5.88	381.85	18	Pf00270, Pf00271, Pf14617	7919	DDX39B	6					0	11	1.018	0.922527	30.88	101.1	101	4.95	7.44	2.56508e+08	2.33895e+08	2.68775e+08	2.2695e+08	2.41354e+08	2.56309e+08	18	18	18	18	18	18	1
AAH14961.1	Cytidine monophosphate (UMP-CMP) kinase 1, cytosolic [OS=Homo sapiens]	0	45.163	40	7	46	1	228	25.9	8.21	93.46	7	Pf00406, Pf02223, Pf06414, Pf13207, Pf13238, Pf13671	51727	CMPK1	1					0	6	1.208	0.792104	26.61	107.2	90.8	15.96	25.48	3.72506e+07	2.3678e+07	3.29554e+07	2.93848e+07	2.65148e+07	1.705e+07	7	6	7	6	6	6	1
NP_001002032.1	jupiter microtubule associated homolog 1 isoform 2 [OS=Homo sapiens]	0	58.597	40	4	49	4	181	19.9	8.32	178.34	4		51155	HN1; JPT1	17	ENSG00000189159.15				0	0	1.21	0.787492	21.73	119.1	94.7	4.19	7.41	1.34816e+08	109431285	1.28163e+08	1.00911e+08	9.67187e+07	8.52816e+07	4	4	4	4	4	4	1	Met-loss+Acetyl [N-Term]
BAD92522.1	activated RNA polymerase II transcription cofactor 4 variant, partial [OS=Homo sapiens]	0	69.564	40	4	49	4	134	15.1	9.38	166.96	4	Pf02229	10923	SUB1	5					0	0	1.39	0.358916	30.25	115.7	80.8	4.57	10.47	4.69499e+07	4.05216e+07	4.09343e+07	2.98402e+07	2.9029e+07	3.45045e+07	4	4	4	4	4	4	1
CAG46536.1	PTK9 [OS=Homo sapiens]	0	80.153	40	11	47	11	350	40.3	6.81	122.31	11	Pf00241	5756	TWF1	12					0	0	1.056	0.98163	27.74	104.5	96.3	2.26	14.35	4.88413e+07	4.35738e+07	4.5292e+07	4.14337e+07	4.18317e+07	3.15774e+07	9	9	7	7	7	6	1	Met-loss+Acetyl [N-Term]
EAW54485.1	hCG2024613, isoform CRA_b [OS=Homo sapiens]	0	46.198	40	7	33	7	261	30	5.73	68.63	7	Pf00226								0	0	1.281	0.621578	18.66	119.2	85.6	5.94	3.57	3.87225e+07	3.19975e+07	3.2643e+07	2.42289e+07	2.23039e+07	2.35675e+07	5	6	7	5	6	7	1
BAD92062.1	poly(rC)-binding protein 2 isoform b variant, partial [OS=Homo sapiens]	0	105.471	40	10	142	6	373	39.5	7.06	298.55	10	Pf00013, Pf13014	5094	PCBP2	12		mRNA Processing			1	0	1.376	0.388634	26.67	119.4	85.6	8	2.49	2.65615e+08	1.97521e+08	2.35533e+08	1.57925e+08	1.60536e+08	1.61181e+08	6	6	6	6	6	6	1
EAW55043.1	ras-related C3 botulinum toxin substrate 1 (rho family, small GTP binding protein Rac1), isoform CRA_d [OS=Homo sapiens]	0	69.044	40	10	77	9	219	24.2	7.75	140.02	10	Pf00071, Pf08477	5879	RAC1	7		Androgen receptor signaling pathway; Regulation of toll-like receptor signaling pathway; Physiological and Pathological Hypertrophy of the Heart; MicroRNAs in cardiomyocyte hypertrophy; Integrin-mediated Cell Adhesion; RANKL/RANK (Receptor activator of NFKB (ligand)) Signaling Pathway; Leptin signaling pathway; TNF related weak inducer of apoptosis (TWEAK) Signaling Pathway; Prolactin Signaling P…			32	1	1.04	0.96669	20.76	101	98.6	11.35	2.25	2.63475e+08	1.92313e+08	2.04556e+08	2.00205e+08	1.87844e+08	192574646	10	10	10	10	9	10	1
EAW93310.1	glutamyl-prolyl-tRNA synthetase, isoform CRA_b [OS=Homo sapiens]	0	344.025	40	44	245	44	1522	171.5	7.33	557.49	44	Pf00458, Pf00587, Pf00749, Pf01406, Pf03129, Pf03950, Pf09180, Pf14497	2058	EPRS	1		Parkinsons Disease Pathway			1	0	0.941	0.761863	45.72	103.3	97.4	6.89	12.83	2.39332e+08	1.82088e+08	2.11211e+08	2.38732e+08	1.88123e+08	1.87848e+08	39	37	38	38	38	39	1
AAA86463.1	Csa-19 [OS=Homo sapiens]	0	132.354	40	12	128	12	217	24.8	9.94	282.82	12	Pf00687	4736	RPL10A	6		Cytoplasmic Ribosomal Proteins			1	0	1.11	0.955678	22.3	106.7	94.8	6.13	1.5	4.04555e+08	3.32503e+08	3.39757e+08	3.19351e+08	3.05417e+08	3.02339e+08	10	11	11	11	12	12	1
NP_001290203.1	ATP-citrate synthase isoform 3 [OS=Homo sapiens]	0	365.403	40	36	295	36	1155	126.1	8.18	676.05	36	Pf00285, Pf00549, Pf02629, Pf08442	47	ACLY	17		Fatty Acid Biosynthesis			1	0	0.97	0.828463	36.28	98.2	95.9	2.77	2.47	5.2252e+08	4.31663e+08	4.81235e+08	4.55365e+08	4.38568e+08	4.56993e+08	34	33	33	31	32	33	1
AAD27776.1	60S ribosomal protein L36 [OS=Homo sapiens]	0	56.002	40	9	44	9	105	12.2	11.5	86.03	9	Pf01158	25873	RPL36	19		Cytoplasmic Ribosomal Proteins			1	0	0.969	0.823857	18.74	101.9	99.5	13.36	3.81	1.58312e+08	1.08422e+08	1.23006e+08	118577128	1.1412e+08	1.07162e+08	9	8	9	8	9	9	1	Met-loss [N-Term]
BAG54178.1	unnamed protein product [OS=Homo sapiens]	0	67.907	40	7	34	2	328	36.1	5.35	108.08	7	Pf00557	10988	METAP2	12					0	0																				1
AAA35484.1	26S protease (S4) regulatory subunit [OS=Homo sapiens]	0	183.648	40	17	120	16	440	49.2	5.96	289.97	17	Pf00004, Pf00910, Pf01078, Pf05496, Pf05673, Pf05729, Pf07724, Pf07726, Pf07728, Pf13191, Pf13401	5700	PSMC1	14		Proteasome Degradation; Parkin-Ubiquitin Proteasomal System pathway			2	0	1.182	0.831328	31.36	115.5	83.6	1.07	9.24	1.94218e+08	1.71618e+08	1.88396e+08	1.27858e+08	1.28398e+08	1.47024e+08	13	13	13	14	13	14	1
AAB60395.1	glycogen phosphorylase B [OS=Homo sapiens]	0	185.149	40	24	100	19	843	96.6	6.71	219.58	24	Pf00343	5834	PYGB	20		Glycogen Metabolism			1	5	0.787	0.233469	33.44	95.8	114.8	9.73	1.29	8.33225e+07	5.98944e+07	7.41625e+07	8.61551e+07	8.39906e+07	8.54328e+07	21	21	20	19	21	20	1
NP_001166925.1	pyruvate dehydrogenase E1 component subunit alpha, somatic form, mitochondrial isoform 2 precursor [OS=Homo sapiens]	0	76.168	40	8	40	6	428	47.5	8.54	139.8	8	Pf00676	5160	PDHA1	X	ENSG00000131828.13	TCA Cycle and Deficiency of Pyruvate Dehydrogenase complex (PDHc); Amino Acid metabolism; Acetylcholine Synthesis; Glycolysis and Gluconeogenesis			4	2	1.055	0.980082	43.17	98.6	77.9	18.33	20.36	2.49256e+07	1.82273e+07	1.63551e+07	1.07698e+07	1.48851e+07	1.56747e+07	7	7	6	6	6	6	1
AAI07805.1	PSMC3 protein, partial [OS=Homo sapiens]	0	116.546	40	16	94	16	491	55	5.52	210.56	16	Pf00004, Pf01078, Pf05496, Pf07724, Pf07728, Pf13191	5702	PSMC3	11		Proteasome Degradation; Parkin-Ubiquitin Proteasomal System pathway			2	0	1.193	0.810015	29.48	103.2	98.3	4.51	4.43	8.37354e+07	6.84597e+07	8.12611e+07	7.33763e+07	7.68699e+07	7.02579e+07	14	13	14	15	15	15	1
BAG35501.1	unnamed protein product [OS=Homo sapiens]	0	100.001	40	8	74	5	340	37.3	6.18	204.63	8	Pf00400	2782	GNB1	1		Nicotine Activity on Dopaminergic Neurons; Human Thyroid Stimulating Hormone (TSH) signaling pathway; Corticotropin-releasing hormone signaling pathway; Myometrial Relaxation and Contraction Pathways; G Protein Signaling Pathways; Calcium Regulation in the Cardiac Cell; Estrogen signaling pathway			7	0	1.169	0.85749	23.46	119	77.3	18.95	7.97	42848270	3.79343e+07	2.88554e+07	2.56204e+07	2.78707e+07	2.37092e+07	4	4	4	4	4	3	1	Met-loss+Acetyl [N-Term]
AAH53343.1	Karyopherin alpha 2 (RAG cohort 1, importin alpha 1) [OS=Homo sapiens]	0	143.37	40	14	109	14	529	57.8	5.4	340.47	14	Pf00514, Pf01749, Pf13513, Pf13646	3838	KPNA2	17					0	0	1.252	0.694033	37.57	114.6	79.7	5.34	15.41	1.56405e+08	1.25921e+08	1.34506e+08	7.9483e+07	9.04643e+07	1.05246e+08	13	13	13	12	12	12	1	Met-loss+Acetyl [N-Term]
EAW75996.1	topoisomerase (DNA) I, isoform CRA_b [OS=Homo sapiens]	0	212.613	40	26	147	26	768	91.2	9.23	318.5	26	Pf01028, Pf02919, Pf14370	7150	TOP1	20					0	0	0.917	0.694033	26.17	96.2	111.9	8.24	1.99	1.64937e+08	1.23521e+08	1.38671e+08	1.59396e+08	1.53357e+08	1.49014e+08	23	20	20	21	22	23	1
BAD96399.1	proteasome 26S non-ATPase subunit 12 isoform 1 variant, partial [OS=Homo sapiens]	0	115.172	39	17	62	17	456	52.9	7.36	179.23	17	Pf01399	5718	PSMD12	17		Proteasome Degradation; Parkin-Ubiquitin Proteasomal System pathway			2	0	1.092	0.974904	30.44	95.3	109.3	3.71	4.56	7.31998e+07	5.94872e+07	6.60449e+07	6.78238e+07	7.19711e+07	7.15301e+07	16	16	16	15	16	15	1
BAE06097.2	MYO1C variant protein [OS=Homo sapiens]	0	205.527	39	35	173	35	1063	121.6	9.42	371.87	35	Pf00063, Pf06017	4641	MYO1C	17		Insulin Signaling			1	0	1.049	0.970674	31.73	105.8	95.9	9.22	3.73	2.32741e+08	2.39241e+08	2.60793e+08	2.28583e+08	2.21533e+08	2.35596e+08	28	30	30	30	29	32	1
AAH18847.2	TALDO1 protein, partial [OS=Homo sapiens]	0	103.173	39	13	101	13	336	37.4	6.81	166.22	13	Pf00923	6888	TALDO1	11		Pentose Phosphate Pathway			1	0	1.103	0.967473	17.65	104.9	96.8	3.66	4.87	3.3417e+08	3.13526e+08	3.25642e+08	2.91204e+08	2.95181e+08	2.66006e+08	12	12	12	12	12	10	1
NP_057146.1	Mitotic spindle-associated MMXD complex subunit MIP18 [OS=Homo sapiens]	0	24.228	39	3	4	3	163	17.7	5.19	11.26	3	Pf01883	51647	FAM96B	16	ENSG00000166595.11			Cytosolic iron-sulfur cluster assembly	2	0	0.967	0.818877	33.28	106.1	55.6	41.96	14.86	4.09527e+06	8.89899e+06	7.20117e+06	2.93556e+06	3.58877e+06	3.8417e+06	3	3	3	3	3	3	1
XP_016862510.1	PREDICTED: protein SEC13 homolog isoform X4 [OS=Homo sapiens]	0	58.097	39	6	27	6	298	33.1	5.57	105.86	6	Pf00400	6396	SEC13	3					0	0	0.928	0.728521	29.09	103.9	101.5	4.73	7.94	20992418	1.73825e+07	1.81395e+07	2.0377e+07	1.73767e+07	1.7409e+07	5	5	5	5	4	5	1	Met-loss+Acetyl [N-Term]
BAH11971.1	unnamed protein product [OS=Homo sapiens]	0	261.875	39	33	233	26	1023	112.8	5.53	534.65	33	Pf00122, Pf00689, Pf00690, Pf00702, Pf08282, Pf12710, Pf13246	476	ATP1A1	1					0	7	1.146	0.898925	29.57	102.7	90	10.38	4.06	5.31715e+08	3.93046e+08	4.20513e+08	3.85057e+08	3.55905e+08	3.46775e+08	30	31	31	28	29	27	1
AAH31061.1	minichromosome maintenance complex component 4 [OS=Homo sapiens]	0	228.464	39	25	161	25	863	96.5	6.74	341.25	25	Pf00493, Pf07728, Pf14551	4173	MCM4	8		Cell Cycle; Gastric Cancer Network 1; Retinoblastoma (RB) in Cancer; G1 to S cell cycle control; DNA Replication			5	0	1.24	0.721038	31.98	108.5	88	12.58	18.35	1.83623e+08	2.05e+08	2.12365e+08	1.5385e+08	2.11825e+08	1.62432e+08	22	24	25	23	25	23	1
CAG33053.1	PSMD3 [OS=Homo sapiens]	0	143.225	39	18	90	18	534	60.9	8.44	185.21	18	Pf01399, Pf08375	5709	PSMD3	17		Proteasome Degradation; Parkin-Ubiquitin Proteasomal System pathway			2	0	1.168	0.860169	34.66	113.3	92.7	1.53	8.5	9.60592e+07	8.17059e+07	8.88053e+07	7.03138e+07	7.97017e+07	6.86202e+07	16	15	16	15	16	16	1
NP_001317604.1	proteasome subunit alpha type-4 isoform 4 [OS=Homo sapiens]	0	92.561	39	9	65	9	230	26.3	8.32	206.72	9	Pf00227	5685	PSMA4	15	ENSG00000041357.15	Proteasome Degradation; Exercise-induced Circadian Regulation			2	0	1.383	0.373967	35.1	111.4	89.3	5.05	1.56	6.94475e+07	5.48062e+07	6.26842e+07	4.75394e+07	4.79494e+07	4.74208e+07	9	9	9	8	9	7	1
NP_003306.3	DnaJ homolog subfamily C member 7 isoform 1 [OS=Homo sapiens]	0	129.215	39	13	49	13	494	56.4	6.96	109.41	13	Pf00226, Pf00515, Pf07719, Pf13414, Pf13424, Pf13431, Pf13432	7266	DNAJC7	17	ENSG00000168259.14	Constitutive Androstane Receptor Pathway		Regulation of HSF1-mediated heat shock response	5	0	1.246	0.708664	31.72	126.8	81.9	15.57	6.39	4.3977e+07	3.80756e+07	3.12991e+07	2.40973e+07	2.5423e+07	2.6642e+07	10	10	9	8	8	8	1
AAH09503.2	Gspt1 protein [OS=Homo sapiens]	0	175.352	39	15	108	15	633	68.4	5.33	276.84	15	Pf00009, Pf03143, Pf03144, Pf07145	2935	GSPT1	16					0	0	1.006	0.905161	36.71	99.9	94.5	13.54	3.92	1.4331e+08	9.75479e+07	1.11565e+08	1.04817e+08	9.50957e+07	9.9583e+07	13	13	13	15	13	13	1
NP_694546.1	26S proteasome regulatory subunit 6B isoform 2 [OS=Homo sapiens]	0	103.024	39	10	115	2	387	43.5	5.26	201.42	10	Pf00004, Pf00006, Pf00910, Pf01057, Pf01078, Pf05496, Pf07724, Pf07726, Pf07728, Pf13191	5704	PSMC4	19; CHR_HG2021_PATCH	ENSG00000281221.2; ENSG00000013275.7	Proteasome Degradation; Parkin-Ubiquitin Proteasomal System pathway			2	0	1.008	0.90775	12	102.4	102.3	4.19	15.53	7.74458e+07	6.40023e+07	6.77665e+07	7.79139e+07	6.61039e+07	5.54143e+07	2	2	2	2	2	2	1	Acetyl [N-Term]
NP_055112.2	persulfide dioxygenase ETHE1, mitochondrial isoform 1 [OS=Homo sapiens]	0	51.034	39	6	39	6	254	27.9	6.83	106.78	6	Pf00753, Pf12706	23474	ETHE1	19	ENSG00000105755.7		Sulfur metabolism	Sulfide oxidation to sulfate	6	0	1.061	0.986202	25.91	105.5	95.3	5.81	5.11	2.61296e+07	2.52987e+07	2.74606e+07	2.40703e+07	2.31518e+07	2.5279e+07	5	6	6	6	4	6	1
NP_005310.1	Histone H1.2 [OS=Homo sapiens]	0	184.378	39	15	204	3	213	21.4	10.93	458.04	15	Pf00538	3006	HIST1H1C	6	ENSG00000187837.3			Formation of Senescence-Associated Heterochromatin Foci (SAHF); Activation of DNA fragmentation factor	10	0	0.729	0.105051	20.45	99.1	116	14.86	6.97	8.57561e+07	9.90941e+07	1.05478e+08	106485467	1.187e+08	1.16463e+08	4	4	4	3	3	3	1	Met-loss [N-Term]; Met-loss+Acetyl [N-Term]
NP_001288172.1	rho GDP-dissociation inhibitor 1 isoform e [OS=Homo sapiens]	0	89.38	39	7	69	7	249	27.5	5.01	203.86	7	Pf02115	396	ARHGDIA	17					0	0	0.979	0.846908	16.24	101.6	103	3.93	3.94	1.15089e+08	108604359	1.1501e+08	1.13042e+08	114063420	1.04697e+08	7	7	7	7	7	7	1	Met-loss+Acetyl [N-Term]
BAG62522.1	unnamed protein product [OS=Homo sapiens]	0	77.158	39	9	63	9	201	22.4	8.53	168.72	9	Pf02221	10577	NPC2	14					0	0	1.139	0.909302	37.9	95.4	103	26.19	11.84	5.39156e+07	6.2997e+07	8.73322e+07	6.03137e+07	7.03018e+07	7.42006e+07	8	9	9	8	8	9	1
NP_003960.1	NEDD8-conjugating enzyme Ubc12 [OS=Homo sapiens]	0	39.366	39	7	42	7	183	20.9	7.69	76.05	7	Pf00179	9040	UBE2M	19	ENSG00000130725.7		Ubiquitin mediated proteolysis	TGF-beta receptor signaling activates SMADs; NIK-->noncanonical NF-kB signaling; Dectin-1 mediated noncanonical NF-kB signaling; Antigen processing: Ubiquitination & Proteasome degradation; Neddylation	19	0	0.957	0.801912	34.81	96.9	96.5	6.2	4.46	7.53242e+07	5.83048e+07	6.58998e+07	6.77804e+07	6.1038e+07	6.18481e+07	7	7	7	7	7	7	1
NP_005372.2	Nucleolin [OS=Homo sapiens]	0	518.465	39	34	494	34	710	76.6	4.7	1529.41	34	Pf00076, Pf13893, Pf14259	4691	NCL	2	ENSG00000115053.15	Pathogenic Escherichia coli infection; VEGFA-VEGFR2 Signaling Pathway	Pathogenic Escherichia coli infection	Major pathway of rRNA processing in the nucleolus and cytosol	7	0	0.818	0.329902	33.26	95.1	105.4	5.92	13.07	9.58498e+08	7.43164e+08	8.59815e+08	1.07863e+09	9.05046e+08	8.11689e+08	34	33	34	32	33	33	1
AAH03656.1	Minichromosome maintenance complex component 5 [OS=Homo sapiens]	0	148.221	39	20	157	20	734	82.3	8.46	320.51	20	Pf00493, Pf07515, Pf07728, Pf14551	4174	MCM5	22		Cell Cycle; G1 to S cell cycle control; DNA Replication			3	0	1.003	0.899638	21.06	79.3	144.5	5.4	44.29	1.43577e+08	1.39198e+08	1.47628e+08	2.60637e+08	3.64359e+08	1.38993e+08	18	19	19	20	20	19	1
BAD96889.1	phosphoribosyl pyrophosphate synthetase 1 variant, partial [OS=Homo sapiens]	0	85.958	39	8	72	5	318	34.8	6.79	173.56	8	Pf00156, Pf13793, Pf14572	5631	PRPS1	X		Nucleotide Metabolism			1	3	1.136	0.91118	26.46	111.9	87	2.33	2.19	9.38188e+07	8.49716e+07	8.85467e+07	6.66787e+07	6.80852e+07	6.53739e+07	8	8	8	7	8	8	1
O00410.4	RecName: Full=Importin-5; Short=Imp5; AltName: Full=Importin subunit beta-3; AltName: Full=Karyopherin beta-3; AltName: Full=Ran-binding protein 5; Short=RanBP5 [OS=Homo sapiens]	0	269.726	39	33	198	33	1097	123.6	4.94	443.69	33	Pf02985, Pf12755, Pf13513, Pf13646	3843	IPO5	13	ENSG00000065150.18			vRNP Assembly	6	0	1.191	0.813686	31.63	104.3	97.9	7.48	5.53	1.90838e+08	1.4362e+08	1.72757e+08	1.60813e+08	1.4173e+08	1.53059e+08	31	28	28	29	27	30	1
NP_001034933.1	acyl-CoA-binding domain-containing protein 7 [OS=Homo sapiens]	0	11.716	39	2	5	2	88	9.8	6.71	13.65	2	Pf00887	414149	ACBD7	10	ENSG00000176244.6			Mitochondrial Fatty Acid Beta-Oxidation	4	0	1.021	0.91118	24.06	107.1	98.1	25.47	10.89	1.37799e+06	1.30896e+06	849014	1.09914e+06	1.13936e+06	1.31457e+06	1	1	1	1	1	1	1
EAX05872.1	heterogeneous nuclear ribonucleoprotein D (AU-rich element RNA binding protein 1, 37kDa), isoform CRA_a [OS=Homo sapiens]	0	235.673	38	17	194	15	377	40.8	6.7	428.73	17	Pf00076, Pf13893, Pf14259	3184	HNRNPD	4		mRNA Processing			1	2	1.026	0.941066	35.91	102.2	104.1	7.22	1.15	3.9452e+08	3.03369e+08	3.32847e+08	3.28247e+08	3.28274e+08	3.19609e+08	17	17	17	16	17	18	1
EAW91426.1	hCG2027326 [OS=Homo sapiens]	0	32.3	38	4	38	1	91	10.3	9.25	68.77	4	Pf01667								0	3	1.142	0.905161	37.75	115.1	81.1	7.56	14.01	3.14162e+08	2.38946e+08	2.65454e+08	2.26935e+08	1.74411e+08	1.76351e+08	4	3	4	4	4	4	1
AAQ15217.1	FP585 [OS=Homo sapiens]	0	83.134	38	13	70	13	346	37.4	7.17	113.59	13	Pf01012	2109	ETFB	19					0	0	1.048	0.970674	20.25	89.6	99.7	8.05	4.2	7.69362e+07	7.47442e+07	8.57424e+07	9.19228e+07	8.59454e+07	8.22503e+07	12	13	13	12	13	12	1
NP_036339.1	heterogeneous nuclear ribonucleoprotein H3 isoform a [OS=Homo sapiens]	0	99.548	38	8	73	8	346	36.9	6.87	187.46	8	Pf00076, Pf14259	3189	HNRNPH3	10	ENSG00000096746.17				0	0	1.036	0.956994	31	102.9	100.7	5.81	11.72	4.91897e+07	4.31612e+07	5.16976e+07	4.45267e+07	4.41157e+07	3.52814e+07	6	7	6	7	6	5	1	Acetyl [N-Term]
BAC16799.1	P53 [OS=Homo sapiens]	0	61.692	38	9	54	9	393	43.7	6.83	126.61	9	Pf00870, Pf07710, Pf08563	7157	TP53	17		miRNAs involved in DNA damage response; Fluoropyrimidine Activity; TP53 Network; Folate Metabolism; Apoptosis Modulation and Signaling; Cell Cycle; Gastric cancer network 2; Oncostatin M Signaling Pathway; Retinoblastoma (RB) in Cancer; Amyotrophic lateral sclerosis (ALS); Apoptosis; Bladder Cancer; Photodynamic therapy-induced HIF-1 survival signaling; TGF-beta Signaling Pathway; MAPK Signaling …			19	0	0.836	0.390834	25.72	91.1	104.6	15.81	5.46	2.90145e+07	3.46331e+07	3.53535e+07	3.82021e+07	3.85409e+07	4.12631e+07	7	7	8	8	8	8	1
NP_036335.1	Glyoxylate reductase/hydroxypyruvate reductase [OS=Homo sapiens]	0	70.051	38	7	42	7	328	35.6	7.39	115.02	7	Pf00389, Pf01488, Pf02826, Pf03446, Pf03807	9380	GRHPR	9	ENSG00000137106.17		Glycine, serine and threonine metabolism; Metabolic pathways; Glyoxylate and dicarboxylate metabolism; Pyruvate metabolism	Glyoxylate metabolism and glycine degradation	7	0	0.975	0.837306	25.48	88.7	105.7	16.05	2.44	4.17625e+07	2.98828e+07	4.49903e+07	4.58169e+07	4.36497e+07	4.54917e+07	7	6	7	7	7	7	1
AAC08964.1	Breakpoint cluster region protein 1 [OS=Homo sapiens]	0	52.911	38	7	36	7	138	15.5	6.54	87.68	7	Pf02961	8815	BANF1	11					0	0	1.242	0.717927	32.53	105.6	101.8	4.02	4.15	5.01513e+07	4.04276e+07	4.6299e+07	4.03252e+07	4.24191e+07	4.22717e+07	6	6	6	7	6	7	1
EAW97557.1	leukotriene A4 hydrolase, isoform CRA_a [OS=Homo sapiens]	0	128.98	38	16	104	2	610	69.1	6.27	239.88	16	Pf01433, Pf09127, Pf13485	4048	LTA4H	12		Eicosanoid Synthesis			1	13	1.013	0.915469	29.88	98.3	94.8	1.46	9.77	7.93384e+07	6.83829e+07	7.31669e+07	8.02251e+07	6.81357e+07	6.50933e+07	14	14	14	14	14	14	1	Met-loss [N-Term]
EAW60452.1	NHP2 non-histone chromosome protein 2-like 1 (S. cerevisiae), isoform CRA_b [OS=Homo sapiens]	0	21.301	38	2	22	2	73	8	7.87	59.23	2	Pf01248	4809	NHP2L1; SNU13	22		mRNA Processing			1	0	1.073	0.998389	26.22	104.3	99.5	17.91	18.91	66443491	4.29189e+07	4.70683e+07	5.51915e+07	42647052	37285482	2	2	2	2	2	2	1
NP_001655.1	transforming protein RhoA isoform 1 precursor [OS=Homo sapiens]	0	134.787	38	10	111	9	193	21.8	6.1	266	10	Pf00025, Pf00071, Pf08477	387	RHOA	3	ENSG00000067560.10	Androgen receptor signaling pathway; Physiological and Pathological Hypertrophy of the Heart; MicroRNAs in cardiomyocyte hypertrophy; Leptin signaling pathway; Pathogenic Escherichia coli infection; AGE/RAGE pathway; Corticotropin-releasing hormone signaling pathway; Spinal Cord Injury; Alpha 6 Beta 4 signaling pathway; Focal Adhesion; G Protein Signaling Pathways; Wnt Signaling Pathway Netpath; …	NOD-like receptor signaling pathway; Colorectal cancer; Leukocyte transendothelial migration; Endocytosis; Neurotrophin signaling pathway; mTOR signaling pathway; MicroRNAs in cancer; Wnt signaling pathway; Axon guidance; Tight junction; Tuberculosis; Bacterial invasion of epithelial cells; TGF-beta signaling pathway; Oxytocin signaling pathway; Regulation of actin cytoskeleton; cGMP-PKG signalin…	Rho GTPase cycle; Ovarian tumor domain proteases; G beta:gamma signalling through PI3Kgamma; RHO GTPases activate CIT; PCP/CE pathway; PI3K/AKT activation; SLIT2:ROBO1 increases RHOA activity; EPHA-mediated growth cone collapse; EPHB-mediated forward signaling; ERBB2 Regulates Cell Motility; Neutrophil degranulation; TGF-beta receptor signaling in EMT (epithelial to mesenchymal transition); Sema4…	111	1	1.011	0.91118	38.03	101.4	91.5	7.4	9.28	2.38173e+08	2.41042e+08	2.42834e+08	1.81248e+08	2.10904e+08	2.06609e+08	10	10	9	11	11	11	1
EAW80543.1	ubiquitin carboxyl-terminal esterase L3 (ubiquitin thiolesterase), isoform CRA_b [OS=Homo sapiens]	0	39.205	38	6	36	1	230	26.1	4.92	67.49	6	Pf01088	7347	UCHL3	13					0	0	2.079	0.00073046	45.3	153.6	64.2	19.59	40.29	15100944	13625300	10151384	9948760	5.69882e+06	4.60459e+06	1	1	1	1	1	1	1
NP_005773.3	THO complex subunit 4 [OS=Homo sapiens]	0	58.876	38	5	53	1	264	27.5	11.05	179.05	5	Pf00076, Pf13893, Pf14259	10189	ALYREF	17	ENSG00000183684.7		RNA transport; Spliceosome; Herpes simplex infection; mRNA surveillance pathway		4	0	1.182	0.968415	14.53	116.4	93.3	41.38	6.64	470350	955734	1.07623e+06	807599	864841	755115	1	1	1	1	1	1	1	Met-loss [N-Term]
NP_004672.2	eukaryotic translation initiation factor 1A, Y-chromosomal isoform 1 [OS=Homo sapiens]	0	13.87	38	3	31	3	144	16.4	5.24	24.15	3	Pf01176	9086	EIF1AY	Y	ENSG00000198692.9	Translation Factors	RNA transport		2	0	1.033	0.955036	36.76	98.9	97.8	13.3	11.8	9.67713e+06	7.0036e+06	7.16279e+06	8.79078e+06	7.15618e+06	6.93568e+06	3	3	3	2	3	2	1
AAO18189.1	prothymosin alpha protein [OS=Homo sapiens]	0	52.202	38	6	113	6	110	12	3.8	221.67	6		5757	PTMA	2					0	0	1.207	0.793816	57.46	102.9	113.6	3.8	26.2	8.59594e+07	6.96134e+07	7.95746e+07	9.02872e+07	8.35138e+07	5.19502e+07	5	6	5	5	5	5	1	Met-loss+Acetyl [N-Term]
BAD96777.1	ribosomal protein L4 variant, partial [OS=Homo sapiens]	0	205.527	38	18	157	2	427	47.7	11	446.78	18	Pf00573, Pf14374	6124	RPL4	15		Cytoplasmic Ribosomal Proteins			1	1	0.584	0.002599	34.61	81.4	138.7	28.69	5.15	4.70127e+07	2.39958e+07	3.05139e+07	5.33692e+07	4.72068e+07	4.90276e+07	3	3	3	3	3	3	1	Met-loss+Acetyl [N-Term]
CAG38759.1	ANXA5 [OS=Homo sapiens]	0	107.224	38	13	121	13	320	35.9	5.05	250.85	13	Pf00191	308	ANXA5	4		Apoptosis-related network due to altered Notch3 in ovarian cancer; Prostaglandin Synthesis and Regulation			2	0	0.887	0.585033	23.46	94.3	105.4	8.62	9.74	1.11961e+08	1.12722e+08	1.24994e+08	1.12223e+08	1.31558e+08	1.29207e+08	12	13	13	12	13	13	1
XP_011533514.1	PREDICTED: ubiquitin carboxyl-terminal hydrolase isozyme L3 isoform X1 [OS=Homo sapiens]	0	53.017	38	7	46	2	294	33.2	6.47	116.35	7	Pf01088	7347	UCHL3	13					0	5	1.014	0.91656	15.73	112.6	89.5	5.03	9.85	4.1458e+07	3.35978e+07	35815054	3.0039e+07	2.75863e+07	2.40068e+07	5	6	5	6	5	6	1
AAF02218.1	proteasome activator PA28 beta [OS=Homo sapiens]	0	51.589	38	8	57	8	239	27.3	5.58	64.18	8	Pf02251, Pf02252	5721	PSME2	14		Proteasome Degradation			1	0	1.146	0.89868	24.68	87.7	131.5	2	4.2	1.24761e+08	1.13013e+08	1.19107e+08	1.73254e+08	169736616	1.56545e+08	7	7	7	6	7	7	1
BAG58215.1	unnamed protein product [OS=Homo sapiens]	0	111.329	38	15	86	15	415	45.3	9.03	191.21	15	Pf00266	29968	PSAT1	9		Trans-sulfuration and one carbon metabolism			1	0	0.818	0.328776	35.53	81.2	113.1	15.08	8.18	1.21841e+08	8.2216e+07	9.05194e+07	1.38912e+08	1.17432e+08	1.18926e+08	15	14	13	15	14	14	1
NP_065174.1	Coronin-1B [OS=Homo sapiens]	0	81.159	38	15	63	15	489	54.2	5.88	95.09	15	Pf00400, Pf08953, Pf08954	57175	CORO1B	11	ENSG00000172725.13				0	0	1.046	0.968604	28.06	101.7	98.7	5.96	4.21	8.41415e+07	7.67971e+07	8.98261e+07	7.53985e+07	8.03915e+07	7.64438e+07	14	14	13	10	13	14	1
AAH51871.1	Chromosome 12 open reading frame 10 [OS=Homo sapiens]	0	85.741	38	9	53	9	376	42.5	6.84	155.03	9	Pf03690	60314	C12orf10	12					0	0	1.065	0.989787	26.98	89.6	129.3	20.59	13.89	2.70862e+07	16417523	1.88389e+07	2.63711e+07	3.25123e+07	2.55102e+07	7	7	7	8	8	8	1
NP_068733.1	Cofilin-2 isoform 1 [OS=Homo sapiens]	0	91.506	38	7	84	1	166	18.7	7.88	173.94	7	Pf00241	1073	CFL2	14	ENSG00000165410.14	Leptin signaling pathway; Regulation of Microtubule Cytoskeleton; Regulation of Actin Cytoskeleton; G13 Signaling Pathway	Axon guidance; Pertussis; Regulation of actin cytoskeleton; Fc gamma R-mediated phagocytosis		8	0																				1
NP_057649.2	Cytochrome c oxidase assembly factor 4 homolog, mitochondrial [OS=Homo sapiens]	0	11.859	38	2	6	2	87	10.1	6.04	5.04	2	Pf06747	51287	COA4	11	ENSG00000181924.6			Mitochondrial protein import; Metabolism of proteins	2	0	0.785	0.459995	4.94	85	108.2	9.22	2.69	1.48733e+06	1.48977e+06	1.36666e+06	1.74349e+06	1.76177e+06	1.65757e+06	1	1	1	1	1	1	1	Met-loss+Acetyl [N-Term]
EAW89272.1	growth factor receptor-bound protein 2, isoform CRA_c [OS=Homo sapiens]	0	32.971	38	7	47	7	203	23.5	6.8	57.83	7	Pf00017, Pf00018, Pf07653, Pf14604	2885	GRB2	17		IL-5 Signaling Pathway; Integrin-mediated Cell Adhesion; Leptin signaling pathway; Prolactin Signaling Pathway; IL-9 Signaling Pathway; B Cell Receptor Signaling Pathway; TNF alpha Signaling Pathway; Interleukin-11 Signaling Pathway; Oncostatin M Signaling Pathway; Brain-Derived Neurotrophic Factor (BDNF) signaling pathway; IL-3 Signaling Pathway; Kit receptor signaling pathway; Focal Adhesion; S…			26	0	1.066	0.992383	34.59	108.2	93.7	1.2	7.24	4.38855e+07	3.86281e+07	4.26605e+07	3.21789e+07	3.45575e+07	3.61741e+07	7	7	7	7	7	7	1
NP_001348.2	Atp-dependent rna helicase a [OS=Homo sapiens]	0	336.581	38	38	254	38	1270	140.9	6.84	555.6	38	Pf00035, Pf00270, Pf00271, Pf04408, Pf07717	1660	DHX9	1	ENSG00000135829.16	mRNA Processing		TRAF6 mediated NF-kB activation; TAK1 activates NFkB by phosphorylation and activation of IKKs complex; RIP-mediated NFkB activation via ZBP1; Activated TLR4 signalling; Interleukin-1 family signaling; mRNA Splicing - Major Pathway; DEx/H-box helicases activate type I IFN and inflammatory cytokines production	34	0	1.153	0.890905	35.78	117.1	79.8	3.7	11.08	3.81909e+08	3.22113e+08	3.36729e+08	2.3141e+08	2.15949e+08	2.63755e+08	35	35	32	33	31	32	1
NP_006057.1	alcohol dehydrogenase [NADP(+)] [OS=Homo sapiens]	0	52.664	38	7	23	7	325	36.6	6.79	55.97	7	Pf00248	10327	AKR1A1	1	ENSG00000117448.13	Benzo(a)pyrene metabolism; Metapathway biotransformation	Glycerolipid metabolism; Pentose and glucuronate interconversions; Glycolysis / Gluconeogenesis; Metabolic pathways	Catabolism of glucuronate to xylulose-5-phosphate; Glutathione conjugation	12	0	0.853	0.454237	23.96	96.4	101.6	6.43	3.13	2.23547e+07	1.74081e+07	21197011	2.27141e+07	2.12391e+07	2.0836e+07	5	5	5	5	5	5	1	Met-loss+Acetyl [N-Term]
NP_008996.1	Hsp90 co-chaperone Cdc37 [OS=Homo sapiens]	0	84.66	38	10	57	10	378	44.4	5.25	102.94	10	Pf03234, Pf08564, Pf08565	11140	CDC37	19	ENSG00000105401.8	TNF alpha Signaling Pathway; Aryl Hydrocarbon Receptor; Aryl Hydrocarbon Receptor Pathway; Simplified Interaction Map Between LOXL4 and Oxidative Stress Pathway; Focal Adhesion-PI3K-Akt-mTOR-signaling pathway	PI3K-Akt signaling pathway	Downregulation of ERBB2 signaling; Constitutive Signaling by EGFRvIII; Constitutive Signaling by Ligand-Responsive EGFR Cancer Variants	17	0	1.072	0.999611	44.9	113.9	80.8	2.59	6.22	1.19632e+08	1.01577e+08	1.07873e+08	7.59757e+07	6.73114e+07	7.50791e+07	9	9	9	7	7	9	1
P05534.2	RecName: Full=HLA class I histocompatibility antigen, A-24 alpha chain; AltName: Full=Aw-24; AltName: Full=HLA class I histocompatibility antigen, A-9 alpha chain; AltName: Full=MHC class I antigen A*24; Flags: Precursor [OS=Homo sapiens]	0	130.913	38	10	77	1	365	40.7	6.34	210.9	10	Pf00129, Pf07654	3105	HLA-A	6		Proteasome Degradation; Allograft Rejection		Interferon alpha/beta signaling; ER-Phagosome pathway; Immunoregulatory interactions between a Lymphoid and a non-Lymphoid cell; Endosomal/Vacuolar pathway; Interferon gamma signaling; Antigen Presentation: Folding, assembly and peptide loading of class I MHC	14	8	0.778	0.209816	49.81	77.1	88.4	16.29	19.4	6.99632e+07	5.10531e+07	4.80714e+07	8.04173e+07	6.05618e+07	5.4349e+07	8	8	8	9	9	9	1
NP_006344.1	High mobility group nucleosome-binding domain-containing protein 4 [OS=Homo sapiens]	0	82.918	38	3	37	3	90	9.5	10.48	135.35	3		10473	HMGN4	6	ENSG00000182952.4				0	0	1.016	0.91814	51.55	103.8	62.6	15.95	31.43	4.39904e+07	5.30155e+07	5.19509e+07	3.03791e+07	29381009	4.88835e+07	2	3	3	2	2	3	1
BAD96692.1	Full-length cDNA 5-PRIME end of clone CS0DF013YM24 of Fetal brain of Homo sapiens (human) (Fragment) variant, partial [OS=Homo sapiens]	0	88.101	38	9	49	9	225	25.6	6.7	127.41	9	Pf01105	10972	TMED10	14		mRNA Processing			1	0	1.304	0.562343	35.67	107.4	73.3	16.25	19.94	5.50359e+07	3.83977e+07	3.85261e+07	2.76466e+07	2.73139e+07	1.86432e+07	7	8	7	8	7	6	1
Q86V81.3	RecName: Full=THO complex subunit 4; Short=Tho4; AltName: Full=Ally of AML-1 and LEF-1; AltName: Full=Aly/REF export factor; AltName: Full=Transcriptional coactivator Aly/REF; AltName: Full=bZIP-enhancing factor BEF [OS=Homo sapiens]	0	80.02	38	6	81	2	257	26.9	11.15	257.01	6	Pf00076, Pf13893, Pf14259	10189	ALYREF	17			Spliceosome; mRNA surveillance pathway; RNA transport; Herpes simplex infection	mRNA 3'-end processing; Transport of Mature mRNA Derived from an Intronless Transcript; mRNA Splicing - Major Pathway; Transport of the SLBP Dependant Mature mRNA; Cleavage of Growing Transcript in the Termination Region ; Transport of Mature mRNA derived from an Intron-Containing Transcript; Transport of the SLBP independent Mature mRNA	19	4	0.859	0.472975	25.92	97.7	101.4	1.97	0.65	1.06401e+08	9.54898e+07	1.04969e+08	1.03362e+08	1.0241e+08	1.01736e+08	5	5	5	6	6	6	1	Met-loss+Acetyl [N-Term]
NP_004757.1	Coatomer subunit beta' [OS=Homo sapiens]	0	115.947	38	19	63	19	906	102.4	5.27	158.12	19	Pf00400, Pf04053	9276	COPB2	3	ENSG00000184432.9			COPI-dependent Golgi-to-ER retrograde traffic; COPI-mediated anterograde transport	11	0	1.075	0.996014	33.95	116.5	86.3	6.65	9.51	6.96922e+07	5.40346e+07	6.60197e+07	4.74079e+07	4.58467e+07	5.37818e+07	18	16	18	13	14	15	1
AAA60053.1	Pyruvate dehydrogenase E1-beta subunit [OS=Homo sapiens]	0	52.743	38	10	49	10	359	39.2	6.65	95.25	10	Pf02779, Pf02780	5162	PDHB	3		Glycolysis and Gluconeogenesis			1	0	1.121	0.939474	26.95	106.5	77.7	8.34	18.8	2.90845e+07	2.57326e+07	3.20048e+07	1.73549e+07	2.44859e+07	1.9267e+07	9	9	9	8	9	8	1
AAP88736.1	MCM2 minichromosome maintenance deficient 2, mitotin (S. cerevisiae) [OS=Homo sapiens]	0	195.805	38	25	143	25	895	100.9	5.58	387.82	25	Pf00493, Pf01078, Pf07728, Pf12619, Pf14551	4171	MCM2	3		Cell Cycle; G1 to S cell cycle control; DNA Replication			3	0	1.187	0.823082	23.79	109.3	85.9	4.74	7.54	1.23322e+08	1.14598e+08	1.28604e+08	8.73285e+07	9.3119e+07	9.88218e+07	21	21	22	20	21	20	1
AAC78728.1	translation initiation factor eIF3 p44 subunit [OS=Homo sapiens]	0	73.625	38	8	58	8	320	35.7	6.43	156.02	8	Pf00076, Pf12353, Pf13893, Pf14259	8666	EIF3G	19		Translation Factors			1	0	1.296	0.582172	26.58	112.2	82.9	9.98	3.8	6.67406e+07	4.87101e+07	5.42201e+07	3.67909e+07	3.88285e+07	3.77806e+07	5	5	5	5	5	5	1
EAW64954.1	glutaminyl-tRNA synthetase, isoform CRA_b [OS=Homo sapiens]	0	119.478	37	20	96	20	793	89.6	7.34	200.98	20	Pf00749, Pf03950, Pf04557, Pf04558	5859	QARS	3					0	0	1.059	0.984739	28.49	109.4	79.5	11.47	17.17	7.7054e+07	8.40232e+07	8.77743e+07	5.03614e+07	6.05657e+07	6.94073e+07	21	21	21	19	19	20	1
AAH01052.1	RecQ protein-like (DNA helicase Q1-like) [OS=Homo sapiens]	0	173.759	37	19	117	19	649	73.4	8.07	274.84	19	Pf00270, Pf00271, Pf04851, Pf09382	5965	RECQL	12					0	0	0.979	0.846908	37.87	99.2	91.4	7.03	7.92	7.37359e+07	6.05322e+07	7.57025e+07	6.25496e+07	6.90535e+07	5.92197e+07	16	13	16	16	16	15	1
NP_803193.2	liprin-beta-1 isoform 2 [OS=Homo sapiens]	0	243.173	37	26	177	2	1011	114	5.55	410.97	26	Pf00536, Pf04111, Pf05483, Pf05911, Pf07647	8496	PPFIBP1	12					0	0	1.118	0.943668	19.55	105.5	101.4	9.66	10.33	13542186	1.42631e+07	1.37109e+07	1.10526e+07	1.25135e+07	1.32064e+07	2	2	2	2	2	2	1
NP_005313.1	Histone H1.5 [OS=Homo sapiens]	0	206.839	37	16	204	13	226	22.6	10.92	426.01	16	Pf00538	3009	HIST1H1B	6	ENSG00000184357.4			Formation of Senescence-Associated Heterochromatin Foci (SAHF); Activation of DNA fragmentation factor	10	0	1.037	0.959211	29.96	107	91.6	7.29	2.65	9.66116e+08	9.70128e+08	1.02739e+09	8.40937e+08	8.35203e+08	8.60706e+08	15	15	14	14	14	15	1	Met-loss [N-Term]; Met-loss+Acetyl [N-Term]
ABP48317.1	immunoglobulin lambda light chain variable region, partial [OS=Homo sapiens]	0.037	1.268	37	1	1	1	89	9.7	6.51	0	1									0	0	0.731	0.107094	17.17	82.1	114	17.78	8.65	4304016	5250674	4.48473e+06		5564547	6.24328e+06	1	1	1		1	1	1
XP_006715869.1	PREDICTED: septin-7 isoform X2 [OS=Homo sapiens]	0	116.312	37	13	80	12	448	52	8.73	190.57	13	Pf00735, Pf01926, Pf05368, Pf10211	989	SEPT7	7					0	1	1.003	0.899069	22.32	94.9	107.7	3.03	1.49	9.67516e+07	8.39367e+07	9.64456e+07	1.00717e+08	1.0144e+08	9.83285e+07	11	11	11	11	12	12	1
NP_004930.1	ATP-dependent RNA helicase DDX1 [OS=Homo sapiens]	0	190.147	37	18	109	18	740	82.4	7.23	310.35	18	Pf00270, Pf00271, Pf00622	1653	DDX1	2	ENSG00000079785.14	DDX1 as a regulatory component of the Drosha microprocessor; mRNA Processing		tRNA processing in the nucleus	5	0	1.189	0.818325	29	105.9	94.6	9.66	3.76	1.19092e+08	8.81403e+07	9.62487e+07	8.33234e+07	8.44893e+07	7.77923e+07	16	15	13	15	15	16	1
AAH87847.1	Unknown (protein for IMAGE:30389268), partial [OS=Homo sapiens]	0	120.829	37	13	84	2	465	50.4	7.85	230.31	13	Pf00009, Pf03144, Pf09173	255308	LOC255308	12					0	0	1.035	0.956537	18.94	102.2	97.3	5.38	18.98	2.47726e+07	2.10915e+07	2.11904e+07	2.2765e+07	2.07516e+07	1.51683e+07	3	3	3	3	3	2	1	Acetyl [N-Term]
AAH09744.1	CsdA protein [OS=Homo sapiens]	0	94.239	37	7	68	1	303	31.9	9.66	144.75	7	Pf00313	8531	CSDA; YBX3	12		RalA downstream regulated genes; Apoptosis-related network due to altered Notch3 in ovarian cancer			2	0	0.877	0.728446	78.79	93.6	106.8	66.36		498647	1.20514e+06			853574		1	1			1		1
BAD92220.1	DEAD/H (Asp-Glu-Ala-Asp/His) box polypeptide 3 variant, partial [OS=Homo sapiens]	0	173.797	37	21	148	20	674	74.5	7.75	308.04	21	Pf00270, Pf00271, Pf04851	1654	DDX3X	X					0	0	1.271	0.647414	30.37	113.7	87.3	5.24	3.65	2.09233e+08	1.66105e+08	1.82838e+08	1.44227e+08	1.32234e+08	1.32464e+08	18	18	17	17	17	18	1
XP_016870502.1	PREDICTED: protein SET isoform X1 [OS=Homo sapiens]	0	130.882	37	12	135	12	309	35.8	4.45	336.69	12	Pf00956	6418	SET	9					0	0	1.129	0.922527	34.75	97.7	93.6	7.78	0.68	2.71833e+08	2.22706e+08	2.82506e+08	2.39571e+08	2.33789e+08	2.35196e+08	11	11	10	11	11	11	1
EAW62938.1	hCG24487, isoform CRA_a [OS=Homo sapiens]	0	147.632	37	12	102	12	282	32.2	9.95	236.38	12	Pf00237, Pf14975								0	0	0.985	0.863163	24.6	106.5	91.6	4.54	14.57	2.31022e+08	1.84236e+08	2.08952e+08	2.15192e+08	1.70676e+08	1.60075e+08	12	11	11	11	10	10	1	Met-loss [N-Term]
NP_001193469.1	F-actin-capping protein subunit beta isoform 2 [OS=Homo sapiens]	0	64.261	37	7	46	7	277	31.3	5.59	111.9	7	Pf01115	832	CAPZB	1	ENSG00000077549.17		Endocytosis	COPI-independent Golgi-to-ER retrograde traffic; COPI-mediated anterograde transport; MHC class II antigen presentation; HSP90 chaperone cycle for steroid hormone receptors (SHR); Factors involved in megakaryocyte development and platelet production	20	0	0.952	0.79448	12.45	105.2	97.5	6.82	2.8	6.37704e+07	6.29832e+07	6.81193e+07	5.84365e+07	6.02793e+07	5.95462e+07	7	7	7	5	5	5	1	Met-loss+Acetyl [N-Term]
BAG57019.1	unnamed protein product [OS=Homo sapiens]	0	196.281	37	20	103	10	701	75.2	8.88	287.27	20	Pf00441, Pf02770, Pf02771, Pf08028								0	10	1.266	0.65844	30.05	114.5	88.4	2.92	4.13	1.96428e+08	1.66178e+08	1.91616e+08	1.39619e+08	1.41178e+08	1.29075e+08	20	19	20	18	19	18	1
NP_004271.1	eukaryotic translation elongation factor 1 epsilon-1 isoform 1 [OS=Homo sapiens]	0	28.812	37	4	27	4	174	19.8	8.54	64.33	4	Pf00043, Pf13410, Pf14497	9521	EEF1E1	6	ENSG00000124802.11			Cytosolic tRNA aminoacylation; SeMet incorporation into proteins	8	0	0.847	0.431767	31.78	108.3	96.2	6.55	13.07	7.8988e+06	7.73271e+06	8.43139e+06	8.69694e+06	7.0982e+06	6.61868e+06	3	4	3	3	2	2	1	Met-loss+Acetyl [N-Term]
NP_689478.1	Transcription factor BTF3 homolog 4 isoform 1 [OS=Homo sapiens]	0	22.002	37	2	6	2	158	17.3	6.35	29.83	2	Pf01849	91408	BTF3L4	1	ENSG00000134717.17				0	0	0.859	0.473434	9.75	88	102.4	3.83	18.24	5083854	4.77538e+06	4.92043e+06	5552232	5.79939e+06	4011566	1	1	1	1	1	1	1
EAX07709.1	DnaJ (Hsp40) homolog, subfamily C, member 8, isoform CRA_c [OS=Homo sapiens]	0	50.5	37	8	31	8	278	32.6	8.98	56.45	8	Pf00226	22826	DNAJC8	1		mRNA Processing			1	0	1.175	0.844928	38.77	102.9	101	9.76	4.48	2.68919e+07	2.85103e+07	2.78872e+07	2.48716e+07	2.60028e+07	2.63984e+07	7	8	8	7	8	8	1
NP_001656.2	Rho-related GTP-binding protein RhoG precursor [OS=Homo sapiens]	0	34.73	37	4	26	3	191	21.3	8.12	78.84	4	Pf00025, Pf00071, Pf04670, Pf08477	391	RHOG	11	ENSG00000177105.9	Brain-Derived Neurotrophic Factor (BDNF) signaling pathway	Shigellosis; Bacterial invasion of epithelial cells; Salmonella infection	G alpha (12/13) signalling events; Neutrophil degranulation; RHO GTPases activate KTN1; GPVI-mediated activation cascade; Sema4D induced cell migration and growth-cone collapse; Rho GTPase cycle	23	0	1.051	0.972839	21.94	101.6	94.9	7.45	7.5	8.8244e+06	7.41303e+06	7.23891e+06	6.86038e+06	7.15293e+06	7742222	3	3	3	3	3	3	1
AAH00934.1	Eukaryotic translation initiation factor 2, subunit 2 beta, 38kDa [OS=Homo sapiens]	0	98.563	37	11	54	11	333	38.4	5.8	91.36	11	Pf01873, Pf04147	8894	EIF2S2	20		Translation Factors; Brain-Derived Neurotrophic Factor (BDNF) signaling pathway			2	0	1.012	0.912841	37.49	88.5	111.6	12.99	8.76	7.39945e+07	5.9579e+07	5.41455e+07	8.33999e+07	6.87153e+07	7.70908e+07	10	8	9	11	11	10	1
AAA58661.1	vacuolar H+-ATPase 56,000 subunit [OS=Homo sapiens]	0	125.851	37	16	87	16	511	56.5	5.81	199.35	16	Pf00006, Pf00306, Pf02874	526	ATP6V1B2	8					0	0	1.092	0.974264	24.68	82.9	125.4	22	1.83	7.80073e+07	5.34154e+07	4.78686e+07	8.45648e+07	8.34513e+07	8.5158e+07	13	13	11	15	13	14	1
BAG35595.1	unnamed protein product [OS=Homo sapiens]	0	60.538	37	7	20	7	227	26.2	8.82	48.14	7	Pf13869	11051	NUDT21	16		mRNA Processing			1	0	1.065	0.989141	33.92	109.6	98	25.29	4.05	2.92166e+07	1.53879e+07	2.61874e+07	2.26124e+07	2.22597e+07	2.36286e+07	7	6	7	7	7	7	1
NP_001026854.1	serine/arginine-rich splicing factor 7 isoform 1 [OS=Homo sapiens]	0	85.048	37	8	76	8	238	27.4	11.82	161.98	8	Pf00076, Pf13893, Pf14259	6432	SRSF7	2	ENSG00000115875.18	mRNA Processing	Herpes simplex infection; Spliceosome	Cleavage of Growing Transcript in the Termination Region ; Transport of Mature mRNA derived from an Intron-Containing Transcript; mRNA 3'-end processing; mRNA Splicing - Major Pathway; mRNA Splicing - Minor Pathway	15	0	1.001	0.897068	26	100	97.8	12.9	6.21	142565231	1.00534e+08	1.40031e+08	1.28272e+08	1.24202e+08	1.37811e+08	8	7	8	7	7	8	1
AAH20803.1	developmentally regulated GTP binding protein 1 [OS=Homo sapiens]	0	53.96	37	9	31	9	367	40.5	8.9	74.24	9	Pf00009, Pf01926, Pf02421, Pf02824	4733	DRG1	22					0	0	0.865	0.497595	38.32	94.3	110.1	21.12	15.16	3.27666e+07	2.02733e+07	2.18796e+07	2.18289e+07	2.89088e+07	2.4284e+07	8	6	6	5	6	6	1
NP_001349.2	Pre-mRNA-splicing factor ATP-dependent RNA helicase DHX15 [OS=Homo sapiens]	0	139.894	36	24	87	23	795	90.9	7.46	164.24	24	Pf00270, Pf00271, Pf04408, Pf07717, Pf13401	1665	DHX15	4	ENSG00000109606.12	mRNA Processing	Spliceosome	mRNA Splicing - Major Pathway	6	1	0.874	0.535131	30.89	67.1	124.4	26.28	9.19	1.16765e+08	6.98636e+07	6.90406e+07	1.36698e+08	1.18061e+08	1.40691e+08	20	18	17	19	18	18	1
ACO44579.1	MHC class I antigen, partial [OS=Homo sapiens]	0	45.839	36	8	37	0	181	21	6.4	73.85	8	Pf00129								0	0																				1
EAW61131.1	drebrin-like, isoform CRA_c [OS=Homo sapiens]	0	107.012	36	13	73	1	491	54.5	5.29	182.93	13	Pf00018, Pf00241, Pf07653, Pf14604	28988	DBNL	7		T-Cell antigen Receptor (TCR) Signaling Pathway			1	0	0.01	1.62313e-16	53.7	2.9	281.6		36.97	45754.8			2524816	5386449	3.92523e+06	1			1	1	1	1
AAD09340.1	NAD+-specific isocitrate dehydrogenase beta subunit isoform B [OS=Homo sapiens]	0	44.601	36	7	29	7	387	42.4	8.46	65.69	7	Pf00180								0	0	1.213	0.779712	39.96	112.2	80.4	1.31	12.58	1.33421e+07	1.15049e+07	1.23403e+07	1.03908e+07	8.5222e+06	7.98727e+06	6	7	7	7	6	6	1
AAA66064.1	Sorbitol dehydrogenase [OS=Homo sapiens]	0	90.713	36	9	39	9	357	38.3	7.97	133.77	9	Pf00107, Pf08240, Pf12847	6652	SORD	15					0	0	1.707	0.0366891	78.86	120.9	70.3	14.97	18.71	2.37699e+07	1.69966e+07	1.697e+07	1.04281e+07	7.88715e+06	1.14529e+07	7	7	7	6	5	7	1	Met-loss+Acetyl [N-Term]
XP_016874205.1	PREDICTED: prostaglandin E synthase 3 isoform X1 [OS=Homo sapiens]	0	116.367	36	7	163	7	165	19.4	4.97	422.25	7	Pf04969	10728	PTGES3	12					0	0	1.043	0.967473	30.82	101.6	99.8	6.79	3.29	2.23923e+08	1.72829e+08	2.11256e+08	1.958e+08	1.97347e+08	2.03362e+08	7	7	7	7	7	7	1
AAH14546.1	ARP2 actin-related protein 2 homolog (Yeast) [OS=Homo sapiens]	0	102.078	36	13	73	1	394	44.7	6.74	170.34	13	Pf00022	10097	ACTR2	2					0	0	0.879	0.549729	19.83	101.7	116.6	11.7	19.18	5676156	5.96386e+06	6764519	5152214	7.06369e+06	7262700	1	1	1	1	1	1	1
BAG35117.1	unnamed protein product [OS=Homo sapiens]	0	37.096	36	4	46	2	105	11.7	7.18	82.46	4	Pf00036, Pf01023, Pf13499	6282	S100A11	1					0	0	1.048	0.970553	60.13	111.5	93.9	4.53	11.5	193426936	1.56358e+08	184577992	1.72432e+08	146901472	1.33946e+08	2	2	2	2	2	2	1
AAX94767.1	MHC class I antigen [OS=Homo sapiens]	0	99.455	36	8	39	1	365	41	6.95	114.78	8	Pf00129, Pf07654	3105	HLA-A	6		Proteasome Degradation; Allograft Rejection			2	4	1.012	0.91118	22.43	87.6	93	2.5	16.03	4.34583e+07	37410581	42703082	5.01482e+07	3.56603e+07	4.1337e+07	3	2	2	5	3	4	1
BAD97000.1	acidic (leucine-rich) nuclear phosphoprotein 32 family, member A variant, partial [OS=Homo sapiens]	0	134.29	36	9	87	6	249	28.5	4.09	238.63	9	Pf12799, Pf13855, Pf14580	8125	ANP32A	15					0	3	1.213	0.780636	35.72	105.3	96.9	11.15	6.04	1.06505e+08	7.76578e+07	8.32417e+07	8.13621e+07	7.39028e+07	7.03289e+07	9	9	9	9	9	9	1
AAH07705.1	serine peptidase inhibitor, Kunitz type, 2 [OS=Homo sapiens]	0	40.419	36	7	34	7	252	28.2	8.29	66.03	7	Pf00014, Pf04306	10653	SPINT2	19					0	0	0.856	0.464684	31.94	47.1	60.3	20.49	19.75	2.62498e+07	16328597	1.77832e+07	30466210	21426594	21502146	6	4	6	6	6	6	1
AAH62437.1	cytochrome c oxidase subunit IV isoform 1 [OS=Homo sapiens]	0	37.446	36	7	42	7	169	19.6	9.51	60.98	7	Pf02936	1327	COX4I1	16		Electron Transport Chain			1	0	1.316	0.529747	29.55	117.2	82	10.15	15.89	1.0474e+08	8.36157e+07	8.10955e+07	5.41854e+07	7.26349e+07	6.00406e+07	7	7	7	6	7	6	1
CAB51168.1	Dyskerin [OS=Homo sapiens]	0	111.67	36	15	71	15	524	58.7	9.42	120.49	15	Pf01472, Pf01509, Pf08068	1736	DKC1	X					0	0	1.178	0.838735	39.99	110.1	92.3	20.05	13.14	6.97116e+07	4.70289e+07	4.51031e+07	4.84536e+07	3.6647e+07	4.04592e+07	14	14	14	13	13	14	1	Met-loss+Acetyl [N-Term]
NP_003124.1	signal recognition particle 9 kDa protein isoform 2 [OS=Homo sapiens]	0	33.557	36	3	15	3	86	10.1	7.97	47.58	3	Pf05486	6726; 653226	SRP9; SRP9P1	1; 10	ENSG00000143742.12		Protein export	SRP-dependent cotranslational protein targeting to membrane	4	0	1.084	0.985514	10.05	103.5	96.1	1.13	4.34	2.00256e+07	17145589	1.90186e+07	1.64929e+07	1.76206e+07	1.66581e+07	3	3	3	3	3	3	1	Met-loss [N-Term]
AAH02360.1	Elongation factor Tu GTP binding domain containing 2 [OS=Homo sapiens]	0	160.181	36	22	110	20	972	109.4	5	250.09	22	Pf00009, Pf00679, Pf03144, Pf03764, Pf14492	9343	EFTUD2	17		mRNA Processing			1	0	1.025	0.939474	33.41	74.7	115.4	10.62	5.86	1.29038e+08	9.24124e+07	1.05071e+08	1.64051e+08	1.43084e+08	1.53127e+08	19	18	18	20	19	19	1
EAW61129.1	drebrin-like, isoform CRA_a [OS=Homo sapiens]	0	113.964	36	13	79	1	500	55.3	5.29	197.46	13	Pf00018, Pf00241, Pf07653, Pf14604	28988	DBNL	7		T-Cell antigen Receptor (TCR) Signaling Pathway			1	11	0.88	0.557394	36.35	77	129.1	15.79	3.73	4.75739e+07	3.17012e+07	4.66695e+07	7.06969e+07	7.46567e+07	7.14503e+07	10	10	8	12	11	12	1
NP_115865.1	28S ribosomal protein S6, mitochondrial [OS=Homo sapiens]	0	22.413	36	3	17	3	125	14.2	9.26	31.27	3	Pf01250	64968	MRPS6	21	ENSG00000243927.5		Ribosome	Mitochondrial translation initiation; Mitochondrial translation elongation; Mitochondrial translation termination	7	0	1.697	0.0402418	39.94	115.1	56.3	13.3	10.76	1.27854e+07	9.2093e+06	9.48829e+06	4.74613e+06	4.40365e+06	5.36027e+06	3	3	3	2	3	3	1	Met-loss [N-Term]
AAH00401.2	SF3B2 protein, partial [OS=Homo sapiens]	0	187.317	36	21	121	21	894	100	5.67	275.46	21	Pf02037, Pf04037, Pf04046	10992	SF3B2	11		mRNA Processing			1	0	1.249	0.702553	34.91	115.8	86.2	7.47	2.65	1.42935e+08	1.07523e+08	1.28778e+08	9.36021e+07	8.73148e+07	9.04115e+07	20	17	19	17	16	17	1	Acetyl [N-Term]
NP_620175.1	HIG1 domain family member 2A, mitochondrial [OS=Homo sapiens]	0.043	1.171	36	1	1	1	106	11.5	10.2	0	1	Pf04588	192286	HIGD2A	5	ENSG00000146066.2				0	0																				1	Met-loss+Acetyl [N-Term]
NP_001670.1	sodium/potassium-transporting ATPase subunit beta-3 [OS=Homo sapiens]	0	70.338	36	7	54	7	279	31.5	8.35	116.21	7	Pf00287	483	ATP1B3	3	ENSG00000069849.10	Calcium Regulation in the Cardiac Cell	Protein digestion and absorption; Cardiac muscle contraction; Aldosterone-regulated sodium reabsorption; Thyroid hormone signaling pathway; cGMP-PKG signaling pathway; Gastric acid secretion; Thyroid hormone synthesis; cAMP signaling pathway; Insulin secretion; Salivary secretion; Proximal tubule bicarbonate reclamation; Carbohydrate digestion and absorption; Endocrine and other factor-regulated …	Ion homeostasis; Basigin interactions; Ion transport by P-type ATPases	27	0	1.24	0.722307	35.36	107.5	88.3	8.76	2.83	1.0833e+08	8.50409e+07	8.65851e+07	7.66009e+07	7.10932e+07	7.16407e+07	7	7	7	5	5	6	1
P29034.3	RecName: Full=Protein S100-A2; AltName: Full=CAN19; AltName: Full=Protein S-100L; AltName: Full=S100 calcium-binding protein A2 [OS=Homo sapiens]	0	51.178	36	5	43	5	98	11.1	4.78	87.56	5	Pf01023, Pf13499	6273	S100A2	1					0	0	1.052	0.973451	32.11	52.6	169.7	8.93	12.73	8.94537e+07	6.53303e+07	7.74019e+07	2.87823e+08	2.21531e+08	2.35404e+08	5	5	5	5	4	5	1
AAH00508.1	proteasome (prosome, macropain) subunit, beta type, 1 [OS=Homo sapiens]	0	63.473	36	5	53	5	241	26.4	8.13	166.04	5	Pf00227	5689	PSMB1	6		Proteasome Degradation			1	0	1.004	0.902296	19.01	104.5	91.1	3.05	6.33	2.79117e+08	257395876	2.79099e+08	2.46109e+08	2.31339e+08	2.11155e+08	5	5	5	5	5	5	1
AAC09385.1	eukaryotic translation elongation factor 1 alpha 1-like 14 [OS=Homo sapiens]	0	157.564	36	17	331	10	398	42.8	8.34	518.44	17	Pf00009, Pf03143, Pf03144								0	3	0.937	0.753401	49.27	84.4	112.1	4.03	8.5	8.8466e+08	7.5016e+08	8.8317e+08	1.24615e+09	1.05993e+09	1.04763e+09	9	11	10	11	11	11	1
NP_116126.3	Lamin-B2 [OS=Homo sapiens]	0	121.606	36	20	113	16	620	69.9	5.59	150.8	20	Pf00038, Pf00932, Pf01576, Pf12128	84823	LMNB2	19	ENSG00000176619.12	Gastric cancer network 2; Fas Ligand (FasL) pathway and Stress induction of Heat Shock Proteins (HSP) regulation	Apoptosis		3	0	0.933	0.742092	24.4	100.8	101.1	2.89	10.3	1.31053e+08	1.08872e+08	1.18415e+08	1.19312e+08	1.12863e+08	9.5149e+07	16	16	16	16	16	16	1
EAW78207.1	splicing factor, arginine/serine-rich 10 (transformer 2 homolog, Drosophila), isoform CRA_c, partial [OS=Homo sapiens]	0	58.194	36	8	39	8	289	33.7	11.25	78.12	8	Pf00076, Pf08777, Pf13893, Pf14259	6434	TRA2B	3		mRNA Processing			1	0	0.784	0.224776	45.83	99.2	112	9.77	11.3	5.03163e+07	3.74018e+07	4.03463e+07	4.87229e+07	4.36581e+07	3.77587e+07	6	6	6	6	6	6	1	Met-loss+Acetyl [N-Term]
AFR31791.1	eukaryotic translation initiation factor 3 [OS=Homo sapiens]	0	270.056	36	40	222	40	1382	166.4	6.79	444.9	40	Pf01399	8661	EIF3A	10		Translation Factors			1	0	1.053	0.975509	33.47	102.7	95.8	3.54	12.19	3.14477e+08	2.5602e+08	2.91904e+08	3.16105e+08	2.4764e+08	2.56807e+08	36	33	35	35	34	37	1	Met-loss [N-Term]
AAG02009.1	similar to Homo sapiens Hpast (HPAST) mRNA with GenBank Accession Number AF001434.1 [OS=Homo sapiens]	0	81.108	36	12	53	9	534	60.4	6.61	112.3	12	Pf00350, Pf01926, Pf12763	10938	EHD1	11		Insulin Signaling			1	3	1.29	0.595507	29.33	109.5	87.2	9.69	16.82	3.0944e+07	2.8606e+07	3.53981e+07	1.83593e+07	2.5098e+07	2.33823e+07	11	11	11	10	11	11	1	Acetyl [N-Term]
BAC11526.1	unnamed protein product [OS=Homo sapiens]	0	118.155	35	13	91	13	432	47.6	5.97	225.44	13	Pf00085, Pf13098, Pf13905	81567	TXNDC5	6					0	0	1.168	0.859951	41.07	112.6	86.6	4.85	6.14	1.23864e+08	1.12949e+08	1.29536e+08	9.60562e+07	8.97484e+07	8.266e+07	12	12	12	11	12	13	1
BAG61806.1	unnamed protein product [OS=Homo sapiens]	0	63.239	35	4	27	1	212	23.9	8.51	94.06	4	Pf00179	7332	UBE2L3	22		Parkin-Ubiquitin Proteasomal System pathway; Parkinsons Disease Pathway			2	0	2.166	0.0801373	31.04	165.8	81.5	16.57	45.97	2.43942e+06	1.68386e+06	1.70375e+06	873010	1.01599e+06	357391	1	1	1	1	1	1	1
CAA05770.1	Xeroderma Pigmentosum Group E Complementing protein [OS=Homo sapiens]	0	207.918	35	29	149	6	1140	126.8	5.26	295.48	29	Pf03178, Pf10433	1642	DDB1	11					0	21	1.098	0.968604	29.6	108.1	94.1	2.39	1.97	1.69255e+08	141149353	1.55324e+08	1.28862e+08	1.31347e+08	1.27563e+08	27	26	27	26	27	27	1
EAW95067.1	ribosomal protein L11, isoform CRA_a [OS=Homo sapiens]	0	53.281	35	5	68	2	133	15.1	8.87	173.14	5	Pf00281, Pf00673	6135	RPL11	1		Cytoplasmic Ribosomal Proteins			1	0	1.293	0.590745	59.07	104.4	87.4	2.87	7.76	6.73988e+07	6.1966e+07	6.43378e+07	5.81644e+07	4.91541e+07	5.08224e+07	3	3	3	3	3	3	1	Met-loss+Acetyl [N-Term]
EAW83322.1	hCG2013819 [OS=Homo sapiens]	0	37.285	35	4	70	2	102	11.3	8.81	156.17	4	Pf01023	729659	S100A11P1	7					0	2	0.435	9.97611e-07	148	60.1	162.8	14.48	47.59	1.19939e+08	1.00868e+08	1.42141e+08	1.47095e+08	4.13685e+08	2.91159e+08	3	4	2	3	4	4	1
BAF84522.1	unnamed protein product [OS=Homo sapiens]	0	48.653	35	6	27	6	315	35.1	6.83	66.69	6	Pf08925	28970	C11orf54	11					0	0	1.333	0.484272	48.85	107.3	89.8	3.9	3.08	1.54586e+07	1.34424e+07	1.3682e+07	1.1869e+07	1.19346e+07	1.11401e+07	6	6	6	5	5	5	1
EAW50259.1	hCG1994130, isoform CRA_d [OS=Homo sapiens]	0	83.337	35	11	87	3	296	33.9	9.55	157.65	11	Pf00410, Pf02453								0	8	1.065	0.99117	28.1	104.3	95.2	6.38	4.65	263019535	2.09509e+08	2.21381e+08	1.92767e+08	207301326	1.9617e+08	10	10	10	10	11	11	1
BAA04747.1	estrogen responsive finger protein [OS=Homo sapiens]	0	83.791	35	15	50	15	630	70.9	8.09	79.21	15	Pf00097, Pf00622, Pf01576, Pf13445, Pf13639, Pf13765, Pf13920, Pf13923, Pf14634, Pf15227	7706	TRIM25	17					0	0	1.038	0.962109	29.3	99	91.4	7.57	13.74	3.66948e+07	3.00249e+07	3.79508e+07	3.68778e+07	2.76346e+07	3.03489e+07	13	11	13	13	12	13	1
AAH49220.1	SLC9A3R1 protein, partial [OS=Homo sapiens]	0	50.154	35	9	35	9	428	45.8	7.18	68.37	9	Pf00595, Pf09007, Pf13180	9368	SLC9A3R1	17					0	0	1.511	0.163718	22.48	124.3	81.4	3.31	1.53	5.37366e+07	4.83011e+07	4.91707e+07	3.24866e+07	3.09574e+07	3.15109e+07	9	9	9	9	8	9	1
NP_006734.1	RNA-binding protein 3 [OS=Homo sapiens]	0	45.962	35	4	47	4	157	17.2	8.91	87.6	4	Pf00076, Pf13893, Pf14259	5935	RBM3	X	ENSG00000102317.17				0	0	1.575	0.104513	41.59	125.3	77.4	14.24	8.41	6.30365e+07	6.8397e+07	7.9366e+07	4.72111e+07	3.91219e+07	4.33226e+07	4	4	4	4	4	4	1
BAG36536.1	unnamed protein product [OS=Homo sapiens]	0	35.389	35	6	17	1	357	39.2	8.41	46.92	6	Pf00400	9410	SNRNP40	1		mRNA Processing			1	0	1.016	0.91118	8.14	111	109.2	0.82	26.69	3.98933e+06	3.42612e+06	3.76279e+06	3.59094e+06	3723780	2164479	1	1	1	1	1	1	1
AAH08751.1	calpain 1, (mu/I) large subunit [OS=Homo sapiens]	0	157.745	35	21	109	21	714	81.8	5.6	268.56	21	Pf00648, Pf01067, Pf13833	823	CAPN1	11		Integrin-mediated Cell Adhesion; Focal Adhesion			2	0	0.966	0.817089	33.88	95.7	108	1.71	7.01	1.40697e+08	1.22403e+08	1.37319e+08	1.29535e+08	1.44066e+08	1.42285e+08	19	19	19	16	17	19	1
AAD23914.1	ubiquitin-like protein activating enzyme [OS=Homo sapiens]	0	185.933	35	14	104	14	640	71.2	5.33	301.67	14	Pf00899, Pf02134, Pf10585, Pf14732	10054	UBA2	19					0	0	1.102	0.967473	34.84	106.8	89.5	2.14	6.41	1.40391e+08	1.19619e+08	1.35761e+08	1.18535e+08	1.06107e+08	1.02078e+08	14	14	13	14	13	13	1
CAL03468.1	immunoglobulin heavy chain variable region, partial [OS=Homo sapiens]	0.039	1.229	35	1	1	1	100	10.8	8.91	0	1	Pf07686								0	0																				1
AAQ13428.1	citrate synthase [OS=Homo sapiens]	0	67.457	35	14	66	14	466	51.7	8.32	82.37	14	Pf00285	1431	CS	12		TCA Cycle			1	0	1.287	0.604298	16.89	111.5	84.9	3.08	0.66	2.31842e+08	1.9465e+08	2.07198e+08	1.56414e+08	1.54847e+08	1.5182e+08	14	14	14	10	13	13	1
BAF83616.1	unnamed protein product [OS=Homo sapiens]	0	85.979	35	12	29	12	635	72	8.25	62.34	12	Pf00017, Pf00069, Pf07714	6850	SYK	9		IL-5 Signaling Pathway; RANKL/RANK (Receptor activator of NFKB (ligand)) Signaling Pathway; B Cell Receptor Signaling Pathway; IL-3 Signaling Pathway; IL-2 Signaling Pathway			5	0	1.221	0.76412	84.19	131.9	78.7	53.14	86.65	3.23914e+07	1.16644e+07	1.37679e+07	2.83683e+07	7.81169e+06	6.08414e+06	11	8	7	10	5	5	1
AAB42010.1	Prt1 homolog [OS=Homo sapiens]	0	190.009	35	25	165	25	873	98.8	5.08	345.75	25	Pf00076, Pf08662, Pf13893, Pf14259	8662	EIF3B	7		Translation Factors			1	0	1.022	0.933651	30.8	104.8	93.7	1.75	5.09	1.64111e+08	1.40792e+08	1.58586e+08	1.46399e+08	1.30811e+08	1.31406e+08	21	23	22	20	21	22	1
NP_001129607.1	60S ribosomal protein L28 isoform 3 [OS=Homo sapiens]	0	51.318	35	8	45	8	169	19.1	10.83	85.29	8	Pf01778	6158	RPL28	19	ENSG00000108107.14	Cytoplasmic Ribosomal Proteins			1	0	1.081	0.988452	36.34	92.1	116.5	4.76	17.16	1.34906e+08	1.07301e+08	1.20508e+08	1.26075e+08	1.44749e+08	1.72653e+08	5	5	5	8	7	7	1	Met-loss+Acetyl [N-Term]
NP_004883.3	vesicle-trafficking protein SEC22b precursor [OS=Homo sapiens]	0	23.598	35	5	23	5	215	24.7	8.51	40.14	5	Pf00957, Pf13774	9554	SEC22B	1	ENSG00000265808.3		SNARE interactions in vesicular transport; Legionellosis; Phagosome		3	0	0.87	0.517492	27.13	105.1	81	10.78	5.19	1.38382e+07	9.99704e+06	1.10521e+07	7.59423e+06	8.09193e+06	8.14242e+06	5	5	4	3	4	4	1	Met-loss [N-Term]
NP_001243820.1	Sorcin isoform C [OS=Homo sapiens]	0	52.556	35	6	37	6	195	21.3	6	69.07	6	Pf00036, Pf13405, Pf13499, Pf13833	6717	SRI	7					0	0	0.863	0.488638	15.7	94.2	110.4	6.29	9.23	7.20616e+07	6.09155e+07	6.05027e+07	8.11764e+07	6.60934e+07	7.32561e+07	6	6	6	6	6	6	1
NP_006364.2	Synaptic vesicle membrane protein VAT-1 homolog [OS=Homo sapiens]	0	74.422	35	8	56	8	393	41.9	6.29	167.3	8	Pf00107, Pf08240, Pf13602	10493	VAT1	17	ENSG00000108828.15			Neutrophil degranulation	3	0	0.957	0.801912	17.65	96.5	100.9	4.78	2.37	6.64654e+07	6.37581e+07	6.73627e+07	6.64777e+07	6.69163e+07	6.78081e+07	7	7	8	8	8	8	1
NP_064535.1	GTP-binding protein SAR1a [OS=Homo sapiens]	0	29.954	35	5	24	2	198	22.4	6.68	23.89	5	Pf00025, Pf00071, Pf00503, Pf01926, Pf08477, Pf09439	56681	SAR1A	10	ENSG00000079332.14	Sterol Regulatory Element-Binding Proteins (SREBP) signalling	Legionellosis; Protein processing in endoplasmic reticulum		3	3	1.005	0.9032	13.32	98.5	99.1	7	1.17	1.79339e+08	1.59569e+08	1.93424e+08	1.70316e+08	1.65976e+08	1.62006e+08	4	4	5	5	4	5	1
NP_001005386.1	actin-related protein 2 isoform a [OS=Homo sapiens]	0	102.226	35	13	78	1	399	45.3	7.2	183.12	13	Pf00022	10097	ACTR2	2	ENSG00000138071.13	Association Between Physico-Chemical Features and Toxicity Associated Pathways; ESC Pluripotency Pathways			2	12	1.106	0.962958	27.81	101.4	99.9	3.11	26.1	7.75276e+07	6.92919e+07	7.82678e+07	4.38789e+07	7.05723e+07	7.05657e+07	11	12	12	11	12	11	1
CAA28571.1	unnamed protein product [OS=Homo sapiens]	0	39.083	35	5	28	5	244	25.8	7.37	77.75	5		5860	QDPR	4					0	0	1.112	0.953458	32.86	108	95.3	12.9	7.64	13781729	1.01903e+07	1.02003e+07	9.6699e+06	8.20374e+06	9.21861e+06	4	4	4	4	4	4	1
NP_054779.1	malignant T-cell-amplified sequence 1 isoform 1 [OS=Homo sapiens]	0	35.426	35	4	26	4	181	20.5	8.82	58.4	4	Pf01472	28985	MCTS1	X	ENSG00000232119.7				0	0	1.069	0.996014	19.1	104.8	97.6	13.75	1.83	17406039	11626804	1.57839e+07	1.42508e+07	1.42316e+07	13620859	3	3	3	3	3	3	1
AAH12547.1	Eukaryotic translation initiation factor 4A, isoform 2 [OS=Homo sapiens]	0	143.02	35	16	166	2	408	46.5	5.48	409.33	16	Pf00270, Pf00271, Pf04851	1974	EIF4A2	3	ENSG00000156976.16	Translation Factors			1	0	1.235	0.736462	46.47	111.3	82.6	23.96	18.11	1.65148e+07	2.26367e+07	2.47306e+07	1.30677e+07	1.82539e+07	17246089	2	2	2	2	2	2	1
AAC03551.1	arsenite translocating atpase [OS=Homo sapiens]	0	33.979	35	7	22	7	348	38.8	4.91	48.84	7	Pf02374	439	ASNA1	19					0	0	0.887	0.58621	30.22	89.5	121.4	2.92	26.19	9.73096e+06	8.26207e+06	8.71425e+06	7.78764e+06	1.15782e+07	1.29991e+07	6	6	5	5	5	6	1
BAD96284.1	dendritic cell protein variant, partial [OS=Homo sapiens]	0	51.49	35	9	39	9	374	42.4	5.63	64.67	9	Pf01399	10480	EIF3M	11					0	0	1.011	0.91118	35.46	105.2	104.7	19.32	15.31	3.52368e+07	2.10246e+07	31640419	2.67933e+07	3.55571e+07	2.97275e+07	9	8	9	8	9	8	1
NP_008868.3	small ubiquitin-related modifier 2 isoform a precursor [OS=Homo sapiens]	0	49.535	35	3	44	2	95	10.9	5.5	68.08	3	Pf00240, Pf11976	6613	SUMO2	17	ENSG00000188612.11		RNA transport	SUMOylation of chromatin organization proteins; Formation of Incision Complex in GG-NER; SUMOylation of transcription factors; Processing of DNA double-strand break ends; SUMOylation of DNA replication proteins; SUMO is conjugated to E1 (UBA2:SAE1); SUMOylation of DNA damage response and repair proteins; SUMO is proteolytically processed; SUMO is transferred from E1 to E2 (UBE2I, UBC9); SUMOylati…	22	0	2.002	0.00175764	16.25	131.2	56.9	13.74	3.37	1.95032e+08	2.19361e+08	2.36465e+08	9.94714e+07	9.70892e+07	1.02312e+08	2	2	2	2	2	2	1	Met-loss+Acetyl [N-Term]
AAC69625.1	u5 snRNP-specific 40 kDa protein [OS=Homo sapiens]	0	34.033	35	6	15	1	357	39.3	8.1	39.77	6	Pf00400	9410	SNRNP40	1		mRNA Processing			1	5	1	0.89225	35.86	101.6	106.1	19.9	1.37	1.91204e+07	1.13198e+07	1.43048e+07	1.44939e+07	1.39967e+07	1.428e+07	6	5	6	6	6	6	1
NP_001177966.1	26S proteasome non-ATPase regulatory subunit 1 isoform 2 [OS=Homo sapiens]	0	168.09	35	22	105	3	922	102.2	5.27	234.99	22	Pf01851, Pf13513, Pf13646	5707	PSMD1	2	ENSG00000173692.12	Proteasome Degradation; Parkin-Ubiquitin Proteasomal System pathway			2	17	1.111	0.955136	35.92	122	84.1	5.44	9.54	1.0084e+08	8.18012e+07	9.90601e+07	5.98531e+07	7.06649e+07	6.2267e+07	18	17	19	14	19	16	1
CAB66549.1	Hypothetical protein [OS=Homo sapiens]	0	28.497	35	4	16	4	182	20.4	6.79	34.24	4	Pf00149, Pf12850	51699	VPS29	12					0	0	1.076	0.995256	39.39	109.1	91.2	0.39	2.02	2.0207e+07	1.76684e+07	1.93268e+07	1.55684e+07	15140580	1.56112e+07	4	4	4	4	3	4	1
EAW92926.1	ribosomal protein L9, isoform CRA_a [OS=Homo sapiens]	0	68.782	35	6	93	2	136	15.3	9.44	258.53	6	Pf00347	6133	RPL9	4		Cytoplasmic Ribosomal Proteins			1	0	0.888	0.589881	15.84	88.1	105	2.82	6.81	2.76927e+07	2.29572e+07	2.51463e+07	2.9389e+07	2.54066e+07	28279571	2	2	2	2	2	2	1
BAA24361.1	hnRNP JKTBP [OS=Homo sapiens]	0	101.868	35	11	102	9	301	33.6	7.31	190.79	11	Pf00076, Pf13893, Pf14259	9987	HNRNPDL; HNRPDL	4	ENSG00000152795.17				0	0	1.049	0.970938	22.69	101.2	102.1	1.96	8.54	7.0389e+07	63890375	6.84755e+07	5.88019e+07	6.80248e+07	6.51627e+07	9	9	9	9	9	9	1	Acetyl [N-Term]
XP_011536806.1	PREDICTED: serine/threonine-protein phosphatase PP1-gamma catalytic subunit isoform X1 [OS=Homo sapiens]	0	124.948	35	11	97	2	362	41.4	6.07	258.8	11	Pf00149	5501	PPP1CC	12					0	0	4.351	3.10618e-13	92.99	149.9	34.5	10.76	99.92	5833508	6.26904e+06	6.57082e+06	1.46409e+06	3.84914e+06	236491	1	1	1	1	1	1	1	Met-loss+Acetyl [N-Term]
NP_001135888.1	aminoacyl tRNA synthase complex-interacting multifunctional protein 1 isoform b precursor [OS=Homo sapiens]	0	83.858	35	8	43	8	336	37	8.65	109.89	8	Pf01588	9255	AIMP1	4	ENSG00000164022.16				0	0	0.91	0.673056	12.6	99.5	106.7	10.87	4.98	4.71709e+07	3.57225e+07	3.63183e+07	4.34836e+07	3.88051e+07	3.93213e+07	7	7	7	7	7	7	1
EAX03526.1	LSM2 homolog, U6 small nuclear RNA associated (S. cerevisiae), isoform CRA_b [OS=Homo sapiens]	0	19.606	35	3	16	3	113	12.7	5.86	47.92	3	Pf01423	57819	LSM2	6		mRNA Processing			1	0	0.706	0.0704157	54.68	64.9	126.9	56.18	17.99	11459073	6.7507e+06	2.1687e+07	2.63245e+07	2.01928e+07	1.8263e+07	3	3	3	3	3	3	1
CAB66585.1	Hypothetical protein [OS=Homo sapiens]	0	54.514	35	7	32	5	200	22.5	8.6	67.87	7	Pf00025, Pf00071, Pf04670, Pf08477	10890	RAB10	2					0	0	1.184	0.828189	18.36	101.8	89.3	12.13	11.12	1.06713e+08	8.01761e+07	7.99732e+07	7.85588e+07	6.17733e+07	7.20901e+07	4	5	4	4	4	5	1
NP_055955.1	Tubulin--tyrosine ligase-like protein 12 [OS=Homo sapiens]	0	111.441	34	13	54	13	644	74.4	5.53	177.2	13	Pf03133	23170	TTLL12	22	ENSG00000100304.12			Carboxyterminal post-translational modifications of tubulin	3	0	0.945	0.776009	43.17	107.6	85	14.37	13.07	3.63487e+07	2.44698e+07	2.78029e+07	2.12941e+07	1.91877e+07	2.4513e+07	11	10	10	9	9	10	1	Acetyl [N-Term]
NP_057185.1	60S ribosome subunit biogenesis protein NIP7 homolog isoform 1 [OS=Homo sapiens]	0	21.312	34	4	14	4	180	20.4	8.51	11.99	4	Pf03657	51388	NIP7	16	ENSG00000132603.13			Major pathway of rRNA processing in the nucleolus and cytosol	4	0	0.965	0.817089	43.77	105.9	92.3	15.02	15.92	30266675	1.96648e+07	2.41049e+07	2.51659e+07	1.99511e+07	1.80888e+07	4	4	4	4	4	3	1
BAG37620.1	unnamed protein product [OS=Homo sapiens]	0	178.253	34	18	100	1	700	80	5	272.86	18	Pf00648, Pf01067, Pf13833	824	CAPN2	1		Integrin-mediated Cell Adhesion; VEGFA-VEGFR2 Signaling Pathway			2	0	0.603	0.0516891	6.64	77.9	129.2	1.05	6.37		1.55711e+06	1.71877e+06	2870491	2570661			1	1	1	1		1
AAP20940.1	NAD(P)H dehydrogenase, quinone 1, partial [OS=Homo sapiens]	0	63.014	34	9	41	9	271	30.6	8.88	77.52	9	Pf02525, Pf03358	1728	NQO1	16		Dopamine metabolism; Aryl Hydrocarbon Receptor; Apoptosis-related network due to altered Notch3 in ovarian cancer; Transcriptional activation by NRF2; Photodynamic therapy-induced NFE2L2 (NRF2) survival signaling; Oxidative Stress			6	0	1.114	0.950928	24.25	104.9	96.3	4.01	7.6	1.13407e+08	1.04124e+08	1.04669e+08	1.01386e+08	9.39969e+07	8.47388e+07	8	9	9	9	9	8	1
AAH36452.1	KCNE1 protein [OS=Homo sapiens]	0.032	1.374	34	1	1	1	105	11.9	8.44	2.4	1	Pf02060	3753	KCNE1	21					0	0																				1
AAH66307.1	Ras homolog enriched in brain [OS=Homo sapiens]	0	39.824	34	6	25	6	184	20.5	5.92	55.81	6	Pf00071, Pf01926, Pf08477	6009	RHEB	7		Follicle Stimulating Hormone (FSH) signaling pathway; Angiopoietin Like Protein 8 Regulatory Pathway; Insulin Signaling			3	0	1.522	0.152	27.62	138.8	47	9.89	4.99	32304284	2.68049e+07	2.52373e+07	9.81613e+06	8729772	9.31456e+06	5	5	5	4	4	4	1
EAW80126.1	TAF15 RNA polymerase II, TATA box binding protein (TBP)-associated factor, 68kDa, isoform CRA_c [OS=Homo sapiens]	0	108.667	34	10	62	9	603	63	7.96	142.93	10	Pf00076, Pf00641, Pf13893, Pf14259	8148	TAF15	17					0	1	0.915	0.683772	30.42	82.8	110.3	9.78	3.42	3.16527e+07	3.36255e+07	3.39604e+07	4.14132e+07	4.29918e+07	4.28538e+07	6	6	8	8	8	9	1
NP_996896.1	elongin-B isoform b [OS=Homo sapiens]	0	30.485	34	3	9	3	161	17.9	6.1	35.01	3	Pf00240	6923	TCEB2; ELOB	16	ENSG00000103363.14	Dual hijack model of Vif in HIV infection			1	0	1.026	0.941075	19.26	101	103.9	11.74	10.33	1.94455e+07	1.36709e+07	1.55338e+07	1.54981e+07	1.67639e+07	1.35253e+07	3	2	2	2	3	3	1
BAA14006.1	c-myc binding protein [OS=Homo sapiens]	0	17.842	34	4	5	4	167	18.6	5.91	11.81	4	Pf02996								0	0	1.299	0.575518	11.19	112	89.1	23.16	12.29	1.27678e+07	8.9312e+06	7.58335e+06	8490254	6.50668e+06	7.28868e+06	3	3	2	3	2	3	1
NP_004420.1	ephrin-B1 precursor [OS=Homo sapiens]	0	70.385	34	7	48	7	346	38	8.94	112.87	7	Pf00812	1947	EFNB1	X	ENSG00000090776.5		Axon guidance	EPH-ephrin mediated repulsion of cells; Ephrin signaling; EPHB-mediated forward signaling	7	0	1.012	0.91118	22.97	98.3	98.7	5.47	11.41	3.86397e+07	3.14608e+07	3.29644e+07	3.83361e+07	3.26532e+07	2.9839e+07	6	7	7	7	6	6	1
AAD02918.1	NADP-dependent isocitrate dehydrogenase [OS=Homo sapiens]	0	106.568	34	13	73	13	414	46.7	6.8	140.94	13	Pf00180	3417	IDH1	2		Glutathione metabolism			1	0	0.976	0.840847	36.48	105.5	92.6	5.03	7.78	1.17155e+08	1.11021e+08	1.22139e+08	1.15465e+08	1.00795e+08	9.7218e+07	12	13	13	13	13	13	1
AAB59457.1	voltage-dependent anion channel [OS=Homo sapiens]	0	63.661	34	9	57	9	294	31.6	7.56	108.98	9	Pf01459	7417	VDAC2	10					0	0	0.945	0.775855	26.13	93.6	105.6	14.41	1.7	1.17485e+08	8.26233e+07	8.59134e+07	9.82914e+07	98597637	9.469e+07	9	9	9	9	9	9	1	Met-loss+Acetyl [N-Term]
BAA02656.1	DnaJ protein homolog [OS=Homo sapiens]	0	142.543	34	7	85	7	397	44.8	7.11	279.98	7	Pf00226, Pf00684, Pf01556	3301	DNAJA1	9		Exercise-induced Circadian Regulation			1	0	1.319	0.521712	27.86	101.9	93.9	4.74	8.89	9.8489e+07	7.83508e+07	8.80481e+07	9.13575e+07	7.69581e+07	7.65432e+07	7	7	7	6	6	7	1
AAA20046.1	Ubiquinol-cytochrome c reductase core I protein [OS=Homo sapiens]	0	103.947	34	11	62	11	480	52.6	6.37	153.19	11	Pf00675, Pf05193, Pf08367	7384	UQCRC1	3		Electron Transport Chain			1	0	1.161	0.875617	20.97	103.7	88.7	7.46	9.61	9.01116e+07	7.01799e+07	7.46396e+07	5.8617e+07	6.94404e+07	6.15525e+07	11	11	11	11	11	11	1
XP_011539528.1	PREDICTED: D-3-phosphoglycerate dehydrogenase isoform X1 [OS=Homo sapiens]	0	132.684	34	17	110	17	607	64.7	6.87	219.54	17	Pf00389, Pf02826	26227	PHGDH	1		Trans-sulfuration and one carbon metabolism			1	0	0.789	0.239351	42.19	105.3	100.7	27.55	10.21	2.02096e+08	2.30363e+08	1.43137e+08	2.05311e+08	1.65958e+08	1.73005e+08	15	16	15	17	17	15	1
NP_001966.1	Gamma-enolase [OS=Homo sapiens]	0	95.721	34	10	253	6	434	47.2	5.03	585.6	10	Pf00113, Pf03952, Pf13378	2026	ENO2	12	ENSG00000111674.8	Glycolysis and Gluconeogenesis	RNA degradation; HIF-1 signaling pathway; Metabolic pathways; Glycolysis / Gluconeogenesis; Biosynthesis of amino acids; Carbon metabolism	Gluconeogenesis; Glycolysis	12	0	0.959	0.801912	24.12	92.9	97	2.38	11.18	21546381	1.83442e+07	2.09253e+07	2.34355e+07	2.02936e+07	18259175	5	5	5	5	5	4	1
NP_004544.1	NADH dehydrogenase [ubiquinone] iron-sulfur protein 6, mitochondrial precursor [OS=Homo sapiens]	0	25.277	34	3	12	3	124	13.7	8.28	25.4	3	Pf10276	4726	NDUFS6	5	ENSG00000145494.11	Electron Transport Chain; Oxidative phosphorylation	Alzheimer's disease; Oxidative phosphorylation; Huntington's disease; Metabolic pathways; Non-alcoholic fatty liver disease (NAFLD); Parkinson's disease	Complex I biogenesis	13	0	1.503	0.171051	40.94	131.9	64	1.04	19.52	2.57098e+07	2.2262e+07	2.4717e+07	1.14794e+07	1.10681e+07	1.52952e+07	3	3	3	2	3	3	1
BAB69067.1	signal recognition particle 14kd [OS=Homo sapiens]	0	49.63	34	5	37	5	136	14.5	10.04	68.96	5	Pf02290	6727	SRP14	15					0	0	1.158	0.88306	39.85	109.4	90.3	11.77	4.68	80228164	5.71016e+07	6.29291e+07	5.0338e+07	5.14206e+07	4.6479e+07	5	5	5	5	5	3	1	Met-loss [N-Term]
XP_005271449.1	PREDICTED: hypoxia up-regulated protein 1 isoform X1 [OS=Homo sapiens]	0	217.95	34	23	128	23	1000	111.3	5.22	335.01	23	Pf00012	10525	HYOU1	11					0	0	0.789	0.23871	37.63	86.2	116.8	4.82	11.79	1.16708e+08	9.2514e+07	1.06304e+08	1.43052e+08	1.12196e+08	1.35853e+08	19	20	19	19	18	21	1
NP_005727.1	Alpha-centractin [OS=Homo sapiens]	0	43.911	34	6	25	3	376	42.6	6.64	78.46	6	Pf00022	10121	ACTR1A	10	ENSG00000138107.12			COPI-independent Golgi-to-ER retrograde traffic; Regulation of PLK1 Activity at G2/M Transition; AURKA Activation by TPX2; Anchoring of the basal body to the plasma membrane; Recruitment of NuMA to mitotic centrosomes; Recruitment of mitotic centrosome proteins and complexes; Loss of Nlp from mitotic centrosomes; COPI-mediated anterograde transport; MHC class II antigen presentation; HSP90 chaper…	33	3	1.083	0.98686	28.48	101	101	12.1	10.31	2.97892e+07	2.06657e+07	2.39841e+07	2.32494e+07	2.4491e+07	1.97739e+07	5	4	5	5	4	3	1	Acetyl [N-Term]
NP_001247421.1	radixin isoform 1 [OS=Homo sapiens]	0	140.188	34	19	179	8	604	71	6.71	297.8	19	Pf00373, Pf00769, Pf09379, Pf09380	5962	RDX	11	ENSG00000137710.14	Regulation of Actin Cytoskeleton			1	0	1.088	0.981153	44.21	112.2	102	5.22	10.22	2.45194e+07	2.02575e+07	2.09752e+07	1.94171e+07	1.64282e+07	19963175	6	6	6	7	7	7	1
AAX88940.1	unknown, partial [OS=Homo sapiens]	0	9.273	34	2	8	2	154	16.5	5.24	22.63	2	Pf01398, Pf14464	10213	PSMD14	2		Parkin-Ubiquitin Proteasomal System pathway			1	0	1.207	0.79448	11.67	115.3	93.2	2.6	8.43	1.40843e+07	1.1805e+07	1.27459e+07	1.14497e+07	9.62195e+06	9.78768e+06	2	2	2	2	2	2	1
XP_006721933.1	PREDICTED: integrin beta-4 isoform X6 [OS=Homo sapiens]	0	313.647	34	40	179	40	1787	198.8	6.16	416.36	40	Pf00041, Pf00362, Pf03160, Pf07965, Pf07974	3691	ITGB4	17		Integrin-mediated Cell Adhesion; Arrhythmogenic Right Ventricular Cardiomyopathy; Alpha 6 Beta 4 signaling pathway; Focal Adhesion; TGF-beta Signaling Pathway			5	0	0.794	0.253635	27.71	82.9	128.7	4.64	7.72	1.54926e+08	1.4841e+08	1.54605e+08	2.52227e+08	2.2812e+08	2.1029e+08	27	32	32	36	35	37	1
NP_004490.2	Heterogeneous nuclear ribonucleoprotein A/B isoform b [OS=Homo sapiens]	0	98.685	34	11	92	10	285	30.6	7.91	195.93	11	Pf00076, Pf08143, Pf13893, Pf14259	3182	HNRNPAB	5	ENSG00000197451.11	Preimplantation Embryo; mRNA Processing			2	0	1.198	0.801912	24.85	98.4	95.4	4.27	9.21	1.20112e+08	9.79444e+07	1.05555e+08	8.79401e+07	9.81311e+07	1.02672e+08	8	7	7	6	7	7	1
XP_016855583.1	PREDICTED: nuclear migration protein nudC isoform X1 [OS=Homo sapiens]	0	74.471	34	11	76	11	392	45.2	5.96	125.04	11	Pf04969, Pf14050	10726	NUDC	1					0	0	1.078	0.991725	25.21	109.7	90.1	4.83	7.48	2.09334e+08	1.65917e+08	1.90195e+08	1.67606e+08	1.42314e+08	1.47249e+08	10	10	10	10	10	10	1
CAI46271.1	Hypothetical protein [OS=Homo sapiens]	0	41.642	34	7	22	6	303	34.8	8.95	32.17	7	Pf00069, Pf01636, Pf07714, Pf14531	983	CDK1	10		Cell Cycle; Retinoblastoma (RB) in Cancer; ATM Signaling Pathway; TGF-beta Signaling Pathway; G1 to S cell cycle control			5	0	1.551	0.124697	34.01	121.7	81.8	16.66	3.05	3.04383e+07	2.63157e+07	2.11937e+07	1.90721e+07	17592587	1.81421e+07	5	6	6	6	6	6	1
XP_005253566.1	PREDICTED: liprin-beta-1 isoform X4 [OS=Homo sapiens]	0	222.642	34	26	168	2	1025	115.4	5.72	373.72	26	Pf00536, Pf04111, Pf05483, Pf05911, Pf07647	8496	PPFIBP1	12					0	22	1.104	0.96713	32.11	106.1	91.6	13.59	12.93	147693655	1.66456e+08	1.7741e+08	1.29295e+08	1.45446e+08	1.63132e+08	22	23	23	23	23	24	1
NP_002159.2	isocitrate dehydrogenase [NADP], mitochondrial isoform 1 precursor [OS=Homo sapiens]	0	55.427	34	11	45	11	452	50.9	8.69	60.18	11	Pf00180	3418	IDH2	15	ENSG00000182054.9	TCA Cycle	Carbon metabolism; 2-Oxocarboxylic acid metabolism; Peroxisome; Glutathione metabolism; Citrate cycle (TCA cycle); Metabolic pathways; Biosynthesis of amino acids	Transcriptional activation of mitochondrial biogenesis; Citric acid cycle (TCA cycle)	15	0	1.461	0.230756	32.68	122.4	74.2	4.7	15.02	3.28779e+07	2.7441e+07	3.27815e+07	1.55312e+07	1.7986e+07	2.04579e+07	9	10	10	8	7	8	1
AAC15854.1	ribosomal protein S13, partial [OS=Homo sapiens]	0	43.411	34	5	64	5	116	13.3	10.59	114.02	5	Pf00312, Pf08069	6207	RPS13	11		Cytoplasmic Ribosomal Proteins			1	0	1.225	0.753401	16.17	110.2	85	2.7	7.29	3.36002e+08	3.08024e+08	3.33764e+08	2.79609e+08	2.44575e+08	2.38351e+08	5	5	5	5	5	5	1
XP_016858330.1	PREDICTED: vesicle-associated membrane protein 3 isoform X1 [OS=Homo sapiens]	0	27.684	34	3	17	3	122	13.8	8.44	77.7	3	Pf00957	9341	VAMP3	1					0	0	1.19	0.816852	22.1	107.9	98.6	8.99	7.84	7.33758e+06	6.07862e+06	5.83031e+06	5.85556e+06	5.94534e+06	5.06587e+06	2	2	2	2	2	2	1
NP_001013685.1	Putative peptidyl-tRNA hydrolase PTRHD1 [OS=Homo sapiens]	0	31.461	34	3	13	3	140	15.8	9.1	53.75	3		391356	PTRHD1	2	ENSG00000184924.5				0	0	1.955	0.0439111	31.31	128.5	69.7	7.45	10.33	3.41814e+06	3.00863e+06	3.69728e+06	1.49196e+06	1.79604e+06	1.67482e+06	2	2	3	2	2	2	1
NP_003452.1	Zyxin [OS=Homo sapiens]	0	97.651	34	11	81	11	572	61.2	6.67	238.03	11	Pf00412	7791	ZYX	7	ENSG00000159840.15	Integrin-mediated Cell Adhesion; Focal Adhesion	Focal adhesion		3	0	0.871	0.523519	30.92	96.8	112.6	11.01	8.11	6.09553e+07	66366408	6.68603e+07	6.96769e+07	7.3875e+07	7.97204e+07	8	9	9	10	9	9	1	Met-loss+Acetyl [N-Term]
XP_016868887.1	PREDICTED: eukaryotic translation initiation factor 3 subunit E isoform X1 [OS=Homo sapiens]	0	70.926	34	15	65	15	480	55.9	6.74	84.26	15	Pf01399, Pf09440	3646	EIF3E	8		Translation Factors			1	0	1.033	0.953602	38.35	97.6	106.8	5.26	7.75	8.42855e+07	6.66752e+07	7.40347e+07	8.41585e+07	7.69542e+07	7.00809e+07	14	15	14	14	15	13	1
NP_077001.1	dCTP pyrophosphatase 1 [OS=Homo sapiens]	0	26.349	34	4	20	4	170	18.7	5.03	44.07	4		79077	DCTPP1	16	ENSG00000179958.8		Pyrimidine metabolism; Metabolic pathways	Interconversion of nucleotide di- and triphosphates	5	0	0.826	0.356278	28.87	77.8	112.3	12.15	3.87	1.42131e+07	1.52746e+07	1.69521e+07	2.32447e+07	24132325	2.22779e+07	4	4	4	4	4	4	1
NP_001824.1	clathrin light chain A isoform a [OS=Homo sapiens]	0	53.957	33	8	43	8	218	23.6	4.53	92.74	8	Pf01086	1211	CLTA	9	ENSG00000122705.16	Synaptic Vesicle Pathway			1	0	1.113	0.951643	27.24	112.4	91.7	13.21	4.92	1.18252e+08	1.32241e+08	1.41142e+08	1.07183e+08	1.15817e+08	1.08638e+08	7	7	7	7	8	7	1
CAA07491.1	PBK1 protein [OS=Homo sapiens]	0	135.437	33	16	85	16	517	58.1	10.11	127.46	16	Pf00687	26156	RSL1D1	16		Senescence and Autophagy in Cancer			1	0	0.92	0.703331	25.61	93.8	95.3	10.48	14.78	1.25469e+08	8.99558e+07	1.02659e+08	1.25906e+08	9.42947e+07	9.83617e+07	15	14	12	14	14	14	1
XP_011533354.1	PREDICTED: general transcription factor IIF subunit 2 isoform X1 [OS=Homo sapiens]	0	30.473	33	6	23	6	275	30.9	9.29	37.9	6	Pf02270	2963	GTF2F2	13		Eukaryotic Transcription Initiation			1	0	1.136	0.91118	18.72	120.4	77.7	3.28	20.4	2.50213e+07	22194182	2.5292e+07	1.97056e+07	1.48042e+07	1.30008e+07	4	4	4	4	5	3	1	Met-loss+Acetyl [N-Term]
AEA35014.1	UBE2L3/KRAS fusion protein [OS=Homo sapiens]	0	90.042	33	7	42	4	296	34	8.1	106.95	7	Pf00071, Pf00179, Pf08477	3845	KRAS	12		IL-5 Signaling Pathway; RalA downstream regulated genes; TNF alpha Signaling Pathway; Oncostatin M Signaling Pathway; Extracellular vesicle-mediated signaling in recipient cells; G Protein Signaling Pathways; MAPK Signaling Pathway; MAPK Cascade; EGF/EGFR Signaling Pathway; Regulation of Actin Cytoskeleton; ErbB Signaling Pathway; DNA Damage Response (only ATM dependent); Serotonin Receptor 2 and…	Oxytocin signaling pathway; Endocrine resistance; Chronic myeloid leukemia; Long-term depression; Tight junction; Melanoma; ErbB signaling pathway; Estrogen signaling pathway; Rap1 signaling pathway; Thyroid cancer; FoxO signaling pathway; Proteoglycans in cancer; Serotonergic synapse; Glioma; Endometrial cancer; GnRH signaling pathway; Neurotrophin signaling pathway; Regulation of actin cytoskel…		77	3	1.361	0.42089	42.33	115	89.9	20.44	9.86	5.51815e+07	3.17302e+07	4.56722e+07	3.46126e+07	3.61463e+07	2.94749e+07	7	7	7	7	7	7	1
NP_001186600.1	calumenin isoform c precursor [OS=Homo sapiens]	0	51.505	33	6	24	6	323	38	4.63	31.25	6	Pf13499	813	CALU	7	ENSG00000128595.16	NOTCH1 regulation of human endothelial cell calcification			1	0	1.312	0.539384	30.8	114.4	94.8	4.36	15	3.33367e+07	3.07202e+07	3.06617e+07	1.94657e+07	2.49389e+07	2.50086e+07	6	6	5	4	5	4	1
EAW81759.1	dynein, cytoplasmic 1, heavy chain 1, isoform CRA_a, partial [OS=Homo sapiens]	0	817.992	33	117	583	1	4583	525.6	6.52	1337	117	Pf00769, Pf03028, Pf03915, Pf04156, Pf07246, Pf07728, Pf08385, Pf08393, Pf12774, Pf12775, Pf12777, Pf12780, Pf12781, Pf13173, Pf13207, Pf13401	1778	DYNC1H1	14					0	115	0.939	0.759421	28.77	95.8	109.5	0.82	3.27	6.19351e+08	5.33162e+08	5.79669e+08	6.12278e+08	6.30157e+08	6.34239e+08	108	104	108	111	111	114	1
NP_039268.1	N(G),N(G)-dimethylarginine dimethylaminohydrolase 2 [OS=Homo sapiens]	0	17.158	33	5	10	5	285	29.6	6.01	24.13	5	Pf02274	23564	DDAH2	6; CHR_HSCHR6_MHC_MANN_CTG1; CHR_HSCHR6_MHC_DBB_CTG1; CHR_HSCHR6_MHC_SSTO_CTG1; CHR_HSCHR6_MHC_MCF_CTG1; CHR_HSCHR6_MHC_QBL_CTG1; CHR_HSCHR6_MHC_COX_CTG1	ENSG00000233076.6; ENSG00000227317.6; ENSG00000213722.8; ENSG00000228128.6; ENSG00000225635.7; ENSG00000206395.8; ENSG00000226634.6			eNOS activation	4	0	0.877	0.594299	16.59	136.1	63.7	38.45	14.81	2.27255e+06	4.47375e+06	4573027	2.07539e+06	2.57435e+06	1.97451e+06	1	2	2	1	1	1	1
EAW79783.1	ribosomal protein L24, isoform CRA_d [OS=Homo sapiens]	0	58.739	33	8	67	8	168	19.4	11.3	113.13	8	Pf01246	6152	RPL24	3		Cytoplasmic Ribosomal Proteins			1	0	0.939	0.760093	27.19	99.7	98.7	8.85	1.94	2.04564e+08	1.58093e+08	1.6406e+08	1.65013e+08	1.57914e+08	1.62903e+08	7	6	6	7	7	6	1
NP_006749.1	splicing factor U2AF 35 kDa subunit isoform a [OS=Homo sapiens]	0	72.973	33	7	50	5	240	27.9	8.81	113.87	7	Pf00076, Pf00642, Pf13893	7307; 102724594	U2AF1; LOC102724594; U2AF1L5	21	ENSG00000160201.11; ENSG00000275895.6	mRNA Processing	Shigellosis; Spliceosome	Cleavage of Growing Transcript in the Termination Region ; Transport of Mature mRNA derived from an Intron-Containing Transcript; mRNA 3'-end processing; mRNA Splicing - Major Pathway	14	3	1.223	0.759587	24.36	110.3	101	6.05	5.41	9.74376e+07	9.13542e+07	1.04425e+08	8.82209e+07	9.45896e+07	8.54192e+07	6	6	6	7	7	8	1	Met-loss+Acetyl [N-Term]
BAD96696.1	proteasome alpha 2 subunit variant, partial [OS=Homo sapiens]	0	79.057	33	6	48	6	234	25.8	7.94	147.16	6	Pf00227, Pf10584	5683	PSMA2	7		Proteasome Degradation			1	0	0.882	0.565816	13.55	75.5	144.6	14.2	5.23	4.23756e+07	2.83776e+07	3.29301e+07	6.11538e+07	5.93576e+07	6.47122e+07	6	4	5	6	6	6	1
AQN67632.1	Talin-1 [OS=Homo sapiens]	0	420.049	33	55	264	55	2558	271.3	6.11	667.9	55	Pf00373, Pf01608, Pf02174, Pf08913, Pf09141, Pf09379	7094	TLN1	9		Integrin-mediated Cell Adhesion; Focal Adhesion			2	0	1.11	0.956254	21.74	103.5	96	3.35	8.38	2.57809e+08	2.36989e+08	2.42254e+08	1.93603e+08	2.23224e+08	2.14091e+08	46	44	44	43	45	44	1
EAW96076.1	calpastatin, isoform CRA_l [OS=Homo sapiens]	0	172.326	33	19	97	19	836	90.1	5.36	211.77	19	Pf00748	831	CAST	5					0	0	1.299	0.573503	47.36	110.9	101.3	0.84	14.31	6.82561e+07	5.87038e+07	6.47502e+07	6.44801e+07	5.61867e+07	4.69826e+07	16	16	15	17	17	17	1	Met-loss+Acetyl [N-Term]
BAG70088.1	annexin I [OS=Homo sapiens]	0	37.729	33	7	25	7	346	38.7	7.02	65.67	7	Pf00191	301	ANXA1	9		VEGFA-VEGFR2 Signaling Pathway; Prostaglandin Synthesis and Regulation			2	0	0.693	0.054777	52.73	89.4	116.5	51.39	61.5	4742619	1.24441e+07	1.48585e+07	3.85825e+06	1.81983e+07	1.66391e+07	3	5	6	3	6	7	1	Met-loss+Acetyl [N-Term]
AAB67716.1	Tubulin folding cofactor B [OS=Homo sapiens]	0	63.178	33	6	38	6	244	27.4	5.24	84.95	6	Pf01302, Pf14560	1155	TBCB	19					0	0	1.195	0.804553	37.75	118.2	89.4	8.97	17.57	2.11833e+07	2.15409e+07	2.37495e+07	1.32383e+07	1.68385e+07	18349408	6	5	6	5	5	6	1
Q9P2E9.4	RecName: Full=Ribosome-binding protein 1; AltName: Full=180 kDa ribosome receptor homolog; Short=RRp; AltName: Full=ES/130-related protein; AltName: Full=Ribosome receptor protein [OS=Homo sapiens]	0	174.113	33	22	104	21	1410	152.4	8.6	295.37	22	Pf03276, Pf04156, Pf05104, Pf09606, Pf12128, Pf13779	6238	RRBP1	20		Ectoderm Differentiation	Protein processing in endoplasmic reticulum		2	1	1.256	0.683262	33.01	128	76.5	10.35	15.17	8.89173e+07	66976385	6.95147e+07	5.2815e+07	4.13343e+07	3.89862e+07	18	17	19	15	15	14	1
XP_011541031.1	PREDICTED: tripartite motif-containing protein 29 isoform X1 [OS=Homo sapiens]	0	138.944	33	17	82	17	622	69.3	7.64	192.73	17	Pf00643, Pf03938	23650	TRIM29	11					0	0	0.892	0.600605	40.28	90.9	106.8	3.76	11.6	8.51411e+07	7.29172e+07	7.51421e+07	9.31465e+07	7.31628e+07	8.79465e+07	14	14	15	16	16	16	1
AAH66326.1	ribosomal protein L27A [OS=Homo sapiens]	0	63.172	33	6	67	6	148	16.5	11	187.15	6	Pf00828	6157	RPL27A	11		Cytoplasmic Ribosomal Proteins			1	0	1.124	0.933651	28.23	94	105.3	17.35	4.94	1.72099e+08	113871954	1.21263e+08	1.43741e+08	1.31776e+08	1.2712e+08	6	6	6	5	5	6	1
EAW86739.1	transcription elongation factor A (SII), 1, isoform CRA_a [OS=Homo sapiens]	0	57.118	33	10	42	10	287	32.2	8.38	63.13	10	Pf01096, Pf07500, Pf08711	6917	TCEA1	8					0	0	0.975	0.837544	29.44	105.5	98.1	9.44	5.62	2.64886e+07	2.75035e+07	2.96022e+07	28698766	26155077	2.50247e+07	10	10	10	10	10	10	1
AAI05803.1	FTH1 protein, partial [OS=Homo sapiens]	0	54.11	33	4	29	4	245	27.8	6.95	73.83	4	Pf00210	2495	FTH1	11					0	0	0.723	0.0933562	66.33	82.1	107.1	54.84	5.3	11170912	2.87289e+07	3.94558e+07	3.84838e+07	3.87312e+07	4.14261e+07	3	3	3	3	4	4	1
NP_005442.2	PDZ and LIM domain protein 7 isoform 1 [OS=Homo sapiens]	0	55.603	33	8	28	8	457	49.8	8.41	61.07	8	Pf00412, Pf00595	9260	PDLIM7	5	ENSG00000196923.13	EBV LMP1 signaling		RET signaling	4	0	0.885	0.579249	28.52	102.4	105.6	6.92	8.45	3.39164e+07	2.86492e+07	2.81364e+07	3.11692e+07	3.02459e+07	34805904	7	7	7	6	7	7	1
AAA52344.1	elongation factor 1 alpha, partial [OS=Homo sapiens]	0	84.875	33	6	278	1	227	24.2	9.58	758.29	6	Pf03143, Pf03144	1915	EEF1A1	6		Translation Factors			1	0																				1
NP_005906.2	DNA replication licensing factor MCM6 [OS=Homo sapiens]	0	215.635	33	22	155	22	821	92.8	5.41	383.73	22	Pf00493, Pf01078, Pf07728, Pf14551	4175	MCM6	2	ENSG00000076003.4	Cell Cycle; Retinoblastoma (RB) in Cancer; G1 to S cell cycle control; DNA Replication	DNA replication; Cell cycle	M/G1 Transition; Assembly of the pre-replicative complex; Unwinding of DNA; Regulation of DNA replication; Activation of ATR in response to replication stress; Activation of the pre-replicative complex; Orc1 removal from chromatin; Removal of licensing factors from origins	26	0	1.077	0.994333	29.08	105.6	90.8	6.1	8.37	2.00652e+08	1.93222e+08	2.1372e+08	1.60562e+08	1.71634e+08	1.84748e+08	21	21	21	19	20	20	1	Acetyl [N-Term]
AAC08434.1	endobrevin [OS=Homo sapiens]	0	28.285	33	3	19	3	100	11.4	6.54	34.77	3	Pf00957	8673	VAMP8	2					0	0	1.337	0.473968	20.9	113.3	75.9	7.87	6.76	2.28947e+07	1.73297e+07	1.92327e+07	1.39882e+07	1.22448e+07	1.21057e+07	3	3	3	2	2	2	1
AAH28386.1	Ribosomal RNA processing 1 homolog B (S. cerevisiae) [OS=Homo sapiens]	0	89.26	33	13	34	13	758	84.4	9.76	78.79	13	Pf05997	23076	RRP1B	21					0	0	0.956	0.801912	31.88	104	99.6	20.18	10.21	3.24266e+07	1.88393e+07	2.53335e+07	2.74429e+07	2.2303e+07	2.28986e+07	12	10	12	11	10	10	1	Met-loss [N-Term]
XP_011515885.1	PREDICTED: ubiquitin-conjugating enzyme E2 variant 2 isoform X1 [OS=Homo sapiens]	0	25.305	33	3	18	1	173	19.5	4.88	55.77	3	Pf00179	7336	UBE2V2	8					0	0	1.108	0.993874	11.96	104.3	94.1	5.46	13.48	1.51942e+06	1412130	1.60937e+06	1531380	1.31663e+06	1.13653e+06	1	1	1	1	1	1	1
NP_001073027.1	heterogeneous nuclear ribonucleoprotein U-like protein 2 [OS=Homo sapiens]	0	198.395	33	20	123	20	747	85.1	4.91	308.26	20	Pf00622, Pf02037, Pf08433, Pf13671	221092	HNRNPUL2	11	ENSG00000214753.2				0	0	0.865	0.497906	33.97	104.6	104.6	8.2	2.79	9.7952e+07	1.0019e+08	9.77744e+07	9.32653e+07	9.29293e+07	9.57925e+07	18	18	19	18	18	17	1
EAW81764.1	dynein, cytoplasmic 1, heavy chain 1, isoform CRA_f [OS=Homo sapiens]	0	812.843	33	116	574	1	4649	532.5	6.42	1320.12	116	Pf00769, Pf03028, Pf03915, Pf04156, Pf07246, Pf07728, Pf08385, Pf08393, Pf12774, Pf12775, Pf12777, Pf12780, Pf12781, Pf13173, Pf13207, Pf13401	1778	DYNC1H1	14					0	0	100	1.62313e-16		191.2		14.14		551405	402752	582762				1	1	1				1
AAF29081.1	HSPC117 [OS=Homo sapiens]	0	108.796	33	10	66	10	505	55.2	7.08	156.7	10	Pf01139	51493	C22orf28; RTCB	22					0	0	1.328	0.495101	29.76	106.4	89.3	11.88	2.46	9.35536e+07	7.14197e+07	7.01952e+07	65800698	6.18979e+07	61295907	10	9	8	9	8	10	1
NP_006005.2	EKC/KEOPS complex subunit LAGE3 [OS=Homo sapiens]	0	50.986	33	2	11	2	143	14.8	8.63	35.82	2	Pf09341	8270	LAGE3	X	ENSG00000196976.7			tRNA modification in the nucleus and cytosol	3	0	1.703	0.0901321	23.33	128.4	50.7	9.79	24.11	5.07773e+06	5.05877e+06	4.56159e+06	1.78416e+06	1.80982e+06	2.62104e+06	2	2	2	2	2	2	1	Acetyl [N-Term]
NP_009210.1	Splicing factor U2AF 65 kDa subunit isoform a [OS=Homo sapiens]	0	67.311	33	8	31	8	475	53.5	9.09	98.9	8	Pf00076, Pf13893, Pf14259	11338	U2AF2	19	ENSG00000063244.12	mRNA Processing	Spliceosome	Cleavage of Growing Transcript in the Termination Region ; Transport of Mature mRNA derived from an Intron-Containing Transcript; mRNA 3'-end processing; mRNA Splicing - Major Pathway	13	0	0.988	0.871922	59.33	115.7	84.1	8	12.83	5.77801e+07	4.72129e+07	4.67299e+07	3.62126e+07	3.32103e+07	4.20244e+07	7	7	7	4	5	5	1
XP_011540695.1	PREDICTED: far upstream element-binding protein 1 isoform X4 [OS=Homo sapiens]	0	133.839	33	16	104	14	667	69.8	7.84	226.59	16	Pf00013, Pf07650, Pf13014	8880	FUBP1	1					0	1	1.422	0.298377	36.95	120.6	78.9	3.85	10.2	9.85197e+07	82406281	8.66329e+07	6.61863e+07	5.57099e+07	5.33745e+07	13	13	13	13	14	13	1
P25205.3	RecName: Full=DNA replication licensing factor MCM3; AltName: Full=DNA polymerase alpha holoenzyme-associated protein P1; AltName: Full=P1-MCM3; AltName: Full=RLF subunit beta; AltName: Full=p102 [OS=Homo sapiens]	0	156.994	33	22	107	22	808	90.9	5.77	244.65	22	Pf00493, Pf01078, Pf07728, Pf14551	4172	MCM3	6	ENSG00000112118.18	Cell Cycle; Retinoblastoma (RB) in Cancer; G1 to S cell cycle control; DNA Replication	DNA replication; Cell cycle	M/G1 Transition; Assembly of the pre-replicative complex; Unwinding of DNA; Regulation of DNA replication; Activation of ATR in response to replication stress; Activation of the pre-replicative complex; Orc1 removal from chromatin; Removal of licensing factors from origins	26	0	1.175	0.845009	28.88	113.5	88.1	3.32	6.09	1.34447e+08	1.25028e+08	1.29616e+08	1.07787e+08	9.49496e+07	9.4831e+07	19	20	19	17	18	17	1	Met-loss+Acetyl [N-Term]
AAV38522.1	Proteasome (prosome, macropain) subunit, alpha type, 5 [OS=Homo sapiens]	0	64.566	33	6	49	6	241	26.4	4.79	134.86	6	Pf00227, Pf10584	5686	PSMA5	1		Proteasome Degradation			1	0	1.031	0.951005	42.54	108.1	96.3	9.95	5.95	8.77499e+07	6.78835e+07	6.85373e+07	5.76682e+07	6.25043e+07	6.25388e+07	6	6	6	5	5	6	1
AAH50036.1	CSNK2A1 protein [OS=Homo sapiens]	0	89.127	33	9	54	8	397	45.9	7.96	123.27	9	Pf00069, Pf01636, Pf07714	1457	CSNK2A1	20		TNF alpha Signaling Pathway; Brain-Derived Neurotrophic Factor (BDNF) signaling pathway			2	1	1.176	0.842552	33.55	93.9	92.1	6.76	5.49	4.26131e+07	4.25719e+07	4.41092e+07	3.97186e+07	4.11135e+07	4.3126e+07	8	9	8	9	9	9	1
BAA07918.1	proteasome subunit p112 [OS=Homo sapiens]	0	151.867	33	20	94	1	953	105.8	5.39	224.67	20	Pf01851, Pf13513, Pf13646	5707	PSMD1	2		Proteasome Degradation; Parkin-Ubiquitin Proteasomal System pathway			2	0	1.141	0.985012	85.7	113	99	40.57	93.84	2.90659e+06	1.32359e+06	1.43855e+06	5554982	1.19626e+06	1.18951e+06	1	1	1	1	1	1	1
BAF83660.1	unnamed protein product [OS=Homo sapiens]	0	167.845	33	17	107	17	645	72.8	5.1	256.01	17	Pf00085, Pf01216, Pf13098, Pf13848, Pf13905	9601	PDIA4	7					0	0	1.118	0.942759	35.56	104.4	95.6	2.82	4.46	1.42606e+08	1.3173e+08	1.39555e+08	1.1745e+08	1.2141e+08	1.24904e+08	16	17	17	16	15	17	1
AAH01446.1	dipeptidyl-peptidase 3 [OS=Homo sapiens]	0	114.591	33	12	57	12	737	82.5	5.1	167.89	12	Pf03571	10072	DPP3	11					0	0	1.071	0.99814	32.46	112.8	90.9	11.43	6.32	5.22194e+07	4.05932e+07	3.94423e+07	3.28234e+07	3.38053e+07	3.61758e+07	11	11	10	9	10	9	1	Met-loss+Acetyl [N-Term]
EAW92250.1	ribosomal protein L35a, isoform CRA_c [OS=Homo sapiens]	0	23.161	33	6	37	6	144	16	11.19	14.59	6	Pf01247	6165	RPL35A	3		Cytoplasmic Ribosomal Proteins			1	0	0.922	0.709581	35.1	93.2	106.3	11.49	8.64	9.28686e+07	8.25444e+07	1.07878e+08	9.91853e+07	8.58218e+07	1.00986e+08	6	6	6	6	6	6	1
AAA59553.1	Microtubule-associated protein 4 [OS=Homo sapiens]	0	204.024	33	19	118	19	1152	121.1	5.45	290.89	19	Pf00418	4134	MAP4	3					0	0	1.021	0.932127	32.48	102.8	105	7.6	3.52	9.12041e+07	9.08812e+07	9.93205e+07	9.30252e+07	9.5969e+07	9.68888e+07	16	15	14	17	18	18	1	Met-loss+Acetyl [N-Term]
AAV74413.1	Nucleostemin [OS=Homo sapiens]	0	67.634	33	13	49	1	549	61.9	9.06	82.62	13	Pf01926, Pf02421, Pf08701	26354	GNL3	3					0	0	0.789	0.385088	17.72	102.7	129.6	26.27	24.27	1.44848e+06	2.17035e+06	2.10843e+06	2.57944e+06	2.84342e+06	1.71618e+06	1	1	1	1	1	1	1
NP_003680.2	aflatoxin B1 aldehyde reductase member 2 isoform 1 [OS=Homo sapiens]	0	67.757	33	7	34	7	359	39.6	7.17	94.14	7	Pf00248	8574	AKR7A2	1	ENSG00000053371.12	Aflatoxin B1 metabolism; Metapathway biotransformation	Metabolism of xenobiotics by cytochrome P450	Aflatoxin activation and detoxification	6	0	1.053	0.97494	34.9	118.8	76.6	3.02	2.95	3.54295e+07	2.91374e+07	3.24365e+07	2.12582e+07	1.9744e+07	1.97321e+07	7	7	7	6	7	6	1
AAD34069.1	CGI-74 protein [OS=Homo sapiens]	0	94.183	33	13	84	9	402	47.6	10.05	150.31	13	Pf03194	51631	LUC7L2	7					0	4	1.022	0.933651	19.73	97	99.5	3.06	7.17	8.17342e+07	7.56228e+07	7.86601e+07	8.13796e+07	7.67063e+07	6.87603e+07	11	11	10	10	12	11	1
NP_001681.2	V-type proton ATPase catalytic subunit A [OS=Homo sapiens]	0	123.918	33	16	75	16	617	68.3	5.52	154.55	16	Pf00006, Pf00306, Pf02874	523	ATP6V1A	3	ENSG00000114573.9		mTOR signaling pathway; Rheumatoid arthritis; Vibrio cholerae infection; Collecting duct acid secretion; Metabolic pathways; Oxidative phosphorylation; Phagosome; Synaptic vesicle cycle; Epithelial cell signaling in Helicobacter pylori infection	Transferrin endocytosis and recycling; ROS, RNS production in phagocytes; Ion channel transport; Insulin receptor recycling	20	0	1.146	0.898925	34.61	111.2	94.4	17.39	3.99	9.15397e+07	5.89723e+07	6.62188e+07	5.45119e+07	56659090	5.21736e+07	15	14	14	16	16	16	1
NP_057439.2	probable ATP-dependent RNA helicase DDX47 isoform 1 [OS=Homo sapiens]	0	70.285	33	9	49	9	455	50.6	9.1	142.24	9	Pf00270, Pf00271	51202	DDX47	12	ENSG00000213782.7			Major pathway of rRNA processing in the nucleolus and cytosol; rRNA modification in the nucleus and cytosol	5	0	1.063	0.988452	34.56	109.9	87.7	13.53	14.45	3.063e+07	3.47111e+07	3.63491e+07	2.46746e+07	2.75526e+07	3.20021e+07	9	9	9	8	8	6	1
BAD92457.1	26S proteasome-associated pad1 homolog variant, partial [OS=Homo sapiens]	0	27.612	33	3	15	3	163	18.9	7.01	29.99	3	Pf13012	10213	PSMD14	2		Parkin-Ubiquitin Proteasomal System pathway			1	0	1.081	0.988452	15.11	99.5	95	23.74	8.55	6.54481e+07	3.5124e+07	5.10563e+07	4.72457e+07	4.1686e+07	4.91174e+07	3	2	2	2	2	2	1
XP_011532966.1	PREDICTED: calnexin isoform X2 [OS=Homo sapiens]	0	197.967	33	19	139	19	646	73.4	4.65	386.78	19	Pf00262	821	CANX	5					0	0	0.874	0.533548	40.53	91.3	103.9	17.97	17.49	1.86523e+08	1.18508e+08	1.34437e+08	1.48415e+08	1.90534e+08	1.38926e+08	16	16	16	17	18	15	1
AAF25683.1	over-expressed breast tumor protein [OS=Homo sapiens]	0	9.344	32	2	18	2	74	8	6.62	19.46	2	Pf15184	100188893	TOMM6	6					0	0	0.867	0.504547	22.78	91.8	108.4	6.92	25.07	1.9905e+07	1.65169e+07	1.64603e+07	2.05658e+07	2.18679e+07	1.30668e+07	2	2	2	2	2	2	1
CAE45922.1	Hypothetical protein [OS=Homo sapiens]	0	98.965	32	15	71	15	552	61.6	5.85	125.54	15	Pf00928	372	ARCN1	11					0	0	1.338	0.470752	34.85	98.7	119.2	2.83	3.45	8.0303e+07	6.64612e+07	7.31071e+07	8.56735e+07	8.38589e+07	7.84159e+07	12	11	12	11	13	13	1
NP_008950.1	Ubiquitin-conjugating enzyme E2 C isoform 1 [OS=Homo sapiens]	0	23.571	32	4	16	4	179	19.6	7.37	39.59	4	Pf00179, Pf05743	11065	UBE2C	20	ENSG00000175063.16	Gastric Cancer Network 1; Gastric cancer network 2	Ubiquitin mediated proteolysis	Inactivation of APC/C via direct inhibition of the APC/C complex; APC/C:Cdc20 mediated degradation of Cyclin B; Autodegradation of Cdh1 by Cdh1:APC/C; APC-Cdc20 mediated degradation of Nek2A; APC/C:Cdh1 mediated degradation of Cdc20 and other APC/C:Cdh1 targeted proteins in late mitosis/early G1; Antigen processing: Ubiquitination & Proteasome degradation; Phosphorylation of the APC/C; APC/C:Cdc2…	39	0	1.268	0.654293	30.72	122.4	100	1.12	38.03	8.68583e+06	7670778	8.43337e+06	3.94767e+06	6.47324e+06	8.62412e+06	4	4	4	3	4	4	1	Met-loss+Acetyl [N-Term]
CAA62690.1	de-ubiquitinase [OS=Homo sapiens]	0	158.43	32	21	136	21	858	95.7	5.03	336.19	21	Pf00443, Pf00627, Pf02148, Pf13423	8078	USP5	12					0	0	1.073	0.997817	19.75	103.1	97.3	11.45	2.83	7.87858e+07	5.60287e+07	6.26143e+07	5.97206e+07	5.61912e+07	5.50451e+07	20	18	19	19	19	18	1
BAH12223.1	unnamed protein product [OS=Homo sapiens]	0	110.435	32	10	110	10	352	38.6	8	253.52	10	Pf00056, Pf02866	4190	MDH1	2		Glycolysis and Gluconeogenesis			1	0	1.098	0.968604	25.91	102.5	88.6	4.48	9.72	264401417	2.13288e+08	2.33123e+08	1.95259e+08	2.20398e+08	1.82489e+08	10	10	10	10	10	10	1
BAD93092.1	Calpain 2, large [catalytic] subunit precursor variant, partial [OS=Homo sapiens]	0	168.547	32	18	98	1	729	83.1	5.06	263.81	18	Pf00648, Pf01067, Pf13833	824	CAPN2	1		Integrin-mediated Cell Adhesion; VEGFA-VEGFR2 Signaling Pathway	Protein processing in endoplasmic reticulum; Apoptosis; Focal adhesion; Alzheimer's disease		6	15	0.947	0.779712	34.9	100.2	98.9	16.11	7.17	1.00609e+08	6.50497e+07	7.62095e+07	8.07228e+07	7.14774e+07	6.85457e+07	15	15	16	16	16	15	1
BAC11324.1	unnamed protein product [OS=Homo sapiens]	0	111.135	32	9	93	9	408	44.9	8.65	225.7	9	Pf04774	26135	SERBP1	1		Apoptosis-related network due to altered Notch3 in ovarian cancer			1	0	1.114	0.951005	47	112.9	86.3	4.14	8.45	1.2321e+08	1.15736e+08	1.17576e+08	1.00492e+08	8.53135e+07	8.47668e+07	9	9	9	8	8	8	1	Met-loss [N-Term]
AAB24841.1	Tat binding protein 7, TBP-7=transcriptional activator [OS=Homo sapiens]	0	83.073	32	10	70	2	458	51.5	5.73	143.78	10	Pf00004, Pf00910, Pf01057, Pf01078, Pf07724, Pf07726, Pf07728, Pf13191								0	8	1.014	0.916947	31.5	119.3	78.5	4.17	10.96	1.0299e+08	8.88872e+07	9.04308e+07	6.16327e+07	5.65569e+07	6.93034e+07	10	10	10	9	8	9	1	Acetyl [N-Term]
EAW91364.1	ladinin 1, isoform CRA_b [OS=Homo sapiens]	0	81.975	32	12	47	1	517	57.1	9.6	104.47	12		3898	LAD1	1					0	0																				1
AAH08801.1	Cold shock domain protein A [OS=Homo sapiens]	0	88.529	32	7	66	1	372	40	9.77	134.15	7	Pf00313	8531	CSDA; YBX3	12		RalA downstream regulated genes; Apoptosis-related network due to altered Notch3 in ovarian cancer			2	3	1.309	0.544505	18.53	120.9	93.1	18.8	11.06	2.04415e+07	1.56186e+07	1.32345e+07	1.26755e+07	1.03738e+07	1.27258e+07	2	2	2	2	3	3	1
AAB82560.1	STE20-like kinase 3 [OS=Homo sapiens]	0	46.155	32	9	20	5	431	47.9	5.43	43.8	9	Pf00069, Pf07714	8428	STK24	13					0	4	1.068	0.995561	23.08	99.7	103.7	8.36	7.71	3.82611e+07	3.03086e+07	3.07896e+07	2.97394e+07	3.25853e+07	3.36557e+07	7	7	7	8	8	8	1	Met-loss+Acetyl [N-Term]
NP_001484.1	Rab GDP dissociation inhibitor alpha [OS=Homo sapiens]	0	68.903	32	9	48	3	447	50.6	5.14	74.19	9	Pf00996	2664	GDI1	X	ENSG00000203879.11	Integrated Breast Cancer Pathway		RAB GEFs exchange GTP for GDP on RABs; Rho GTPase cycle	8	0	0.737	0.214372	36.95	106.2	136	70.79	21.39	8.0212e+06	2.45846e+06	2.29323e+06	4.47718e+06	2.95717e+06	3.22773e+06	2	2	1	2	1	1	1
CAG46781.1	Rab6A [OS=Homo sapiens]	0	31.041	32	6	28	5	208	23.5	5.38	45.19	6	Pf00025, Pf00071, Pf02421, Pf04670, Pf08477, Pf09439	5870	RAB6A	11					0	0	0.902	0.644717	22.4	108.8	84.2	21.87	26.74	3.42495e+07	2.67212e+07	2.0827e+07	3.26229e+07	2.00405e+07	2.12031e+07	5	5	5	5	5	5	1	Met-loss+Acetyl [N-Term]
NP_001186731.1	60S ribosomal protein L11 isoform 2 [OS=Homo sapiens]	0	45.512	32	6	50	3	177	20.1	9.6	124.2	6	Pf00281, Pf00673	6135	RPL11	1		Cytoplasmic Ribosomal Proteins			1	3	0.98	0.849313	21.09	99	101.7	7.85	2.47	9.50616e+07	89912145	83585615	9.21592e+07	8.59732e+07	8.73959e+07	5	5	5	5	5	5	1	Met-loss+Acetyl [N-Term]
AAC27674.1	eIF-3 p110 subunit [OS=Homo sapiens]	0	164.56	32	23	128	23	913	105.3	5.72	259.67	23	Pf01399, Pf05470	8663	EIF3C	16		Translation Factors			1	0	1.152	0.890905	32.08	119	87.5	4.35	1.75	1.73675e+08	1.4239e+08	1.51823e+08	1.13733e+08	1.08171e+08	1.0734e+08	21	20	21	19	19	19	1
O43169.2	RecName: Full=Cytochrome b5 type B; AltName: Full=Cytochrome b5 outer mitochondrial membrane isoform; Flags: Precursor [OS=Homo sapiens]	0	64.451	32	3	56	3	146	16.3	4.97	281.11	3	Pf00173	80777	CYB5B	16	ENSG00000103018.16	Oxidation by Cytochrome P450		Phase I - Functionalization of compounds	4	0	0.794	0.254395	39.18	68.1	116.2	15.66	42.56	2.81054e+07	2.43242e+07	3.44905e+07	1.96255e+07	4.91065e+07	4.29703e+07	3	3	3	3	3	3	1
EAX11058.1	alkylglycerone phosphate synthase, isoform CRA_b [OS=Homo sapiens]	0	65.782	32	11	52	11	684	75.3	7.5	143.67	11	Pf01565, Pf02913	8540	AGPS	2		Triacylglyceride Synthesis			1	0	1.28	0.622954	40.07	97.8	89.5	7.54	11.82	2.0941e+07	1.75542e+07	2.20549e+07	1.67263e+07	2.04495e+07	1.71569e+07	8	10	10	8	10	10	1
BAG58917.1	unnamed protein product [OS=Homo sapiens]	0	104.422	32	13	80	13	535	60.1	4.42	161.66	13	Pf07915, Pf12999, Pf13015	5589	PRKCSH	19					0	0	0.968	0.822988	31.26	117.4	97.9	7.06	8.51	1.21637e+08	9.23781e+07	1.06169e+08	7.81372e+07	9.08376e+07	8.35686e+07	12	12	10	11	11	11	1
BAD96691.1	epithelial protein lost in neoplasm beta variant, partial [OS=Homo sapiens]	0	102.781	32	15	60	15	759	85.2	6.84	137.59	15	Pf00412	51474	LIMA1	12					0	0	1.217	0.772508	37.57	117.5	91.6	11.28	2.87	1.14093e+08	8.80436e+07	86562999	7.23593e+07	7.34633e+07	6.89109e+07	12	12	12	12	12	12	1
EAW87021.1	transcription elongation factor B (SIII), polypeptide 1 (15kDa, elongin C), isoform CRA_b [OS=Homo sapiens]	0	18.247	32	2	10	2	84	8.9	5.76	22.64	2	Pf03931	6921	TCEB1; ELOC	8					0	0	1.165	0.865522	18.84	106.8	89.9	4.51	6.83	1.38528e+07	1.31662e+07	13400975	1.0945e+07	9699654	1.09994e+07	2	2	2	2	2	2	1
CAH18372.1	Hypothetical protein [OS=Homo sapiens]	0	10.094	32	2	11	2	140	15.5	8.72	16.41	2	Pf04667	2029	ENSA	1					0	0	3.034	8.00948e-09	40.33	125	80.9	46.49	5.35	1.75121e+07	7.14369e+06	8.06513e+06	5.37155e+06	4.73301e+06	4925190	2	2	2	2	2	2	1
XP_005255285.3	PREDICTED: calcium-regulated heat stable protein 1 isoform X1 [OS=Homo sapiens]	0	13.34	32	2	10	2	168	18.1	8.85	24.98	2	Pf00313	23589	CARHSP1	16					0	0	1.137	0.925073	11.89	137.9	85.4	20.29	37.55	4.51326e+06	5.95355e+06	5432482	3.13629e+06	5.73504e+06	3172613	2	2	2	1	2	1	1
AAF31670.1	Tropomodulin 3 [OS=Homo sapiens]	0	42.128	32	8	35	8	352	39.6	5.19	89.9	8	Pf03250	29766	TMOD3	15					0	0	1.025	0.941066	30.31	101.6	111	2.81	28.73	2.70959e+07	2.50232e+07	2.64469e+07	1.61099e+07	2.74549e+07	2.74314e+07	8	8	7	6	8	7	1
AAH56155.1	Sf3b1 protein, partial [OS=Homo sapiens]	0	163.723	32	20	106	1	789	87.4	7.33	245.25	20	Pf08920, Pf12815	23451	SF3B1	2		mRNA Processing			1	0	0.985	0.863961	12.45	100.1	98.2	13.06	8.19	10583680	11783644	12621042	10722367	11755889	12272451	1	1	1	1	1	1	1
NP_001091868.1	coatomer subunit alpha isoform 1 [OS=Homo sapiens]	0	186.675	32	29	113	29	1233	139.2	7.59	263.29	29	Pf00400, Pf04053, Pf06957	1314	COPA	1	ENSG00000122218.14				0	0	0.939	0.759859	23.33	96.5	106	2.53	3.91	1.10489e+08	9.21369e+07	1.00699e+08	1.04309e+08	1.05107e+08	1.09592e+08	23	25	24	25	26	25	1
AAP20105.1	transformation-related gene 7 [OS=Homo sapiens]	0	29.784	32	3	16	2	175	19.8	6.64	55.56	3	Pf01105	222068	TMED4	7					0	0	0.474	1.2819e-05	62.12	90.8	128	28.32	28.85	7.83441e+06	3.8132e+06	6.68589e+06	5.35904e+06	8.95841e+06	9.29835e+06	2	2	2	2	2	2	1
AAP35590.1	dihydropyrimidinase-like 2 [OS=Homo sapiens]	0	147.851	32	12	87	1	619	67	6	287.92	12	Pf01979, Pf02815, Pf13594								0	0	1.156	0.978758	1.98	121.3	104.9	1.89		1.36755e+06		1.33359e+06			1074117	1		1			1	1
NP_003923.2	hsc70-interacting protein isoform 1 [OS=Homo sapiens]	0	127.187	32	13	105	13	369	41.3	5.27	217.29	13	Pf00515, Pf13371, Pf13414, Pf13431, Pf13432	6767	ST13	22	ENSG00000100380.13			Regulation of HSF1-mediated heat shock response	4	0	1.062	0.988004	22.93	106.8	94.4	4.2	7.24	1.35002e+08	1.24176e+08	1.39346e+08	1.07862e+08	1.22181e+08	1.12606e+08	11	12	11	10	11	12	1
AAF09482.1	E2IG3 [OS=Homo sapiens]	0	76.411	32	13	50	1	560	63.5	9.54	87.23	13	Pf01926, Pf02421, Pf08701	26354	GNL3	3					0	11	0.799	0.266976	29.38	85.7	114.4	6.52	4.56	3.66005e+07	2.87194e+07	30979519	4.29949e+07	3.85814e+07	3.93296e+07	10	11	11	11	11	11	1
NP_067038.1	regulation of nuclear pre-mRNA domain-containing protein 1B [OS=Homo sapiens]	0	63.589	32	9	25	5	326	36.9	5.97	58.88	9	Pf04818	58490	RPRD1B	20	ENSG00000101413.11			RNA polymerase II transcribes snRNA genes	3	4	0.877	0.544746	22.56	97.9	108	2.36	13.51	1.84352e+07	1.60916e+07	1.82279e+07	1.53571e+07	1.83397e+07	1.9558e+07	9	9	9	6	8	8	1	Met-loss+Acetyl [N-Term]
NP_002931.2	ATP-binding cassette sub-family E member 1 [OS=Homo sapiens]	0	95.761	32	14	63	14	599	67.3	8.34	94.68	14	Pf00005, Pf04068, Pf13304, Pf13671	6059	ABCE1	4	ENSG00000164163.10			Interferon alpha/beta signaling	4	0	1.035	0.956094	39.53	103	93.7	8.11	8.42	7.9437e+07	5.96514e+07	6.68959e+07	67859285	5.75269e+07	5.73924e+07	13	12	12	13	13	13	1
NP_005361.2	Ras-related protein Rab-8A [OS=Homo sapiens]	0	45.585	32	6	26	4	207	23.7	9.07	36.15	6	Pf00025, Pf00071, Pf08477	4218	RAB8A	19	ENSG00000167461.11	Focal Adhesion-PI3K-Akt-mTOR-signaling pathway	Pancreatic secretion; Endocytosis; AMPK signaling pathway	Translocation of GLUT4 to the plasma membrane; TBC/RABGAPs; VxPx cargo-targeting to cilium; Regulation of PLK1 Activity at G2/M Transition; Anchoring of the basal body to the plasma membrane; RAB GEFs exchange GTP for GDP on RABs; RAB geranylgeranylation	23	0	4.618	1.62313e-16	95.83	140.4	36.1	15.54	50.82	1.69621e+07	1.31917e+07	1.17594e+07	3.57452e+06	2.40195e+06	6.40243e+06	3	3	2	3	3	2	1
AAA60080.1	Pgm1 [OS=Homo sapiens]	0	66.324	32	12	52	12	562	61.3	6.64	76.19	12	Pf00408, Pf02878, Pf02879, Pf02880	5236	PGM1	1		Glycogen Metabolism			1	0	1.196	0.8028	30	108.6	94.3	8.8	5.59	2.9654e+07	2.19554e+07	2.76441e+07	2.15538e+07	2.35789e+07	2.2659e+07	10	10	10	10	10	10	1
AAH23528.2	glutaredoxin 5 [OS=Homo sapiens]	0	32.937	32	3	36	1	157	16.6	6.79	122.4	3	Pf00462	51218	GLRX5	14					0	0	1.559	0.323993	28.69	121.7	82.1	21.88	15.65	4384051	2.97142e+06	2.70766e+06	1.68356e+06	2.07238e+06	2.24258e+06	1	1	1	1	1	1	1
NP_006808.1	endoplasmic reticulum resident protein 29 isoform 1 precursor [OS=Homo sapiens]	0	47.028	32	7	47	7	261	29	7.31	105.13	7	Pf07749, Pf07912	10961	ERP29	12	ENSG00000089248.6		Protein processing in endoplasmic reticulum		1	0	0.906	0.655806	25.52	92.4	106.7	8.56	21.39	3.38716e+07	3.03483e+07	3.76092e+07	2.64588e+07	4.00036e+07	3.59502e+07	6	6	6	7	7	7	1
NP_001238968.1	ras-related protein Rab-5C isoform b [OS=Homo sapiens]	0	42.398	32	6	33	5	249	27	8.66	92.07	6	Pf00009, Pf00025, Pf00071, Pf04670, Pf08477	5878	RAB5C	17	ENSG00000108774.14				0	1	0.877	0.542579	38.43	92.4	101.6	1.66	14.6	25218834	2.13481e+07	2.33304e+07	2.21619e+07	2.89398e+07	2.41912e+07	5	6	6	5	6	6	1
CAD97673.1	hypothetical protein, partial [OS=Homo sapiens]	0	47.748	32	11	46	11	290	33.1	7.94	61.46	11	Pf00043, Pf00462, Pf02798, Pf13409, Pf13417, Pf14497	9446	GSTO1	10		Myometrial Relaxation and Contraction Pathways			1	0	1.076	0.995256	28.18	97.8	117.7	19.59	6.47	1.04164e+08	6.22866e+07	7.74772e+07	8.69597e+07	9.65762e+07	8.79571e+07	9	8	11	11	10	10	1
EAW68637.1	hCG1784554, isoform CRA_a [OS=Homo sapiens]	0	94.024	32	11	51	11	372	39.1	5.45	108.13	11	Pf01398, Pf13012	8665	EIF3F	11		Translation Factors			1	0	1.069	0.996442	24.7	109.5	84.9	5.62	11.65	6.98023e+07	5.48147e+07	6.52127e+07	4.80106e+07	4.80638e+07	5.73851e+07	9	9	9	10	9	9	1
CAG28558.1	CKS2, partial [OS=Homo sapiens]	0	4.867	32	1	1	1	79	9.8	7.72	3.04	1	Pf01111	1164	CKS2	9					0	0	1.531	0.73399	303.15	181.5	118.5	127.04		230090		11701.3		31379		1		1		1		1
BAD96908.1	coatomer protein complex, subunit zeta 1 variant, partial [OS=Homo sapiens]	0	45.53	32	4	24	4	177	20.3	4.88	78.69	4	Pf01217	22818	COPZ1	12					0	0	1.243	0.716362	47.06	111.3	88.4	6.36	3.8	2.15346e+07	1.75689e+07	18009121	1.4704e+07	1.43371e+07	1.52265e+07	4	4	3	3	4	3	1	Acetyl [N-Term]
BAG61570.1	unnamed protein product [OS=Homo sapiens]	0	159.455	32	24	119	1	1009	111.9	5.22	226.71	24	Pf03178, Pf10433	1642	DDB1	11					0	0	0.895	0.753401	67.49	75.8	101.3	73.08	29.73		1.54179e+06	534291	751659	1.20198e+06	1.3593e+06		1	1	1	1	1	1
NP_009148.2	programmed cell death protein 10 [OS=Homo sapiens]	0	33.462	32	5	11	5	212	24.7	8.19	33.28	5	Pf06840	11235	PDCD10	3	ENSG00000114209.14				0	0	1.054	0.976694	31.63	101.7	103.7	10	8.83	2.28833e+07	1.64685e+07	1.90655e+07	1.88597e+07	1.58155e+07	1.83967e+07	5	4	5	4	3	4	1
XP_011517227.1	PREDICTED: niban-like protein 1 isoform X2 [OS=Homo sapiens]	0	119.899	32	14	75	14	776	87.5	6.05	189.89	14		64855	FAM129B	9					0	0	1.085	0.983721	40.21	92	128.4	8.2	18.54	5.65572e+07	4.22567e+07	4.78788e+07	4.69572e+07	6.34835e+07	6.53917e+07	13	13	12	12	13	13	1
BAH12514.1	unnamed protein product [OS=Homo sapiens]	0	38.451	32	6	40	6	130	15.1	10.37	91.75	6	Pf01198	6160	RPL31	2	ENSG00000071082.10	Cytoplasmic Ribosomal Proteins			1	0	1.128	0.925073	52.38	96.7	108.3	32.81	7.25	1.32689e+08	6.61198e+07	7.64126e+07	9.0983e+07	7.74297e+07	8.06539e+07	3	3	4	4	4	4	1
BAG34830.1	unnamed protein product [OS=Homo sapiens]	0	7.397	32	3	8	3	73	8.5	7.28	1.69	3	Pf00240	59286	UBL5	19					0	0	2.57	2.30213e-06	31.49	146.2	52.9	8.01	66.26	1.7926e+07	1.39743e+07	1.4626e+07	14469878	5.22647e+06	4.67281e+06	3	3	3	2	3	2	1
BAB11885.1	BSCv, partial [OS=Homo sapiens]	0	101.024	31	9	79	9	429	47.7	6.11	193.61	9	Pf03088, Pf08450	57136	APMAP	20					0	0	0.952	0.79448	29.97	100.7	96	5.73	4.59	8.74043e+07	7.20978e+07	7.39941e+07	6.84258e+07	7.10112e+07	7.29317e+07	9	9	8	7	7	8	1
NP_060713.1	septin-11 isoform 2 [OS=Homo sapiens]	0	60.308	31	10	56	5	429	49.4	6.81	109.03	10	Pf00735	55752	SEPT11	4	ENSG00000138758.11		Bacterial invasion of epithelial cells		1	4	1.109	0.956537	31.34	111.5	99.8	20.43	10.81	2.44977e+07	28726989	3.5268e+07	2.32118e+07	28186137	2.63732e+07	8	9	9	7	7	7	1	Met-loss+Acetyl [N-Term]
NP_057128.2	fumarylacetoacetate hydrolase domain-containing protein 2A [OS=Homo sapiens]	0	49.543	31	5	17	5	314	34.6	8.24	49.67	5	Pf01557	51011	FAHD2A	2	ENSG00000115042.9				0	0	1.192	0.813643	21.97	109.6	107.8	14.74	6.47	1.71392e+07	1.21695e+07	1.23515e+07	1.37842e+07	1.23721e+07	1.18401e+07	5	3	4	4	5	5	1
NP_001975.1	S-formylglutathione hydrolase [OS=Homo sapiens]	0	90.973	31	6	69	6	282	31.4	7.02	154.17	6	Pf00326, Pf00756, Pf05448, Pf12695, Pf12697	2098	ESD	13	ENSG00000139684.13	Phase I biotransformations, non P450	Carbon metabolism	Glutathione conjugation	6	0	0.906	0.65487	30.75	100.9	109.7	19.5	7.84	7.27934e+07	4.28388e+07	5.754e+07	6.06821e+07	6.17614e+07	5.25908e+07	6	6	6	6	6	6	1
AAH29482.1	Hypothetical protein HSPC152 [OS=Homo sapiens]	0	32.014	31	3	24	3	125	14.1	5.47	63.48	3	Pf03966	51504	TRMT112	11					0	0	1.363	0.416004	17.63	123	83.9	13.72	3.1	3.00863e+07	2.01888e+07	2.38598e+07	1.57716e+07	15043472	1.58831e+07	3	3	3	3	3	3	1
AAI39732.1	IQ motif containing GTPase activating protein 1 [OS=Homo sapiens]	0	319.212	31	42	224	39	1657	189.2	6.48	558.2	42	Pf00307, Pf00397, Pf00616, Pf03836, Pf11016	8826	IQGAP1	15		VEGFA-VEGFR2 Signaling Pathway; EGF/EGFR Signaling Pathway; Regulation of Actin Cytoskeleton; G13 Signaling Pathway			4	3	0.986	0.865522	29.94	106.9	99	6.49	3.77	1.95704e+08	1.93508e+08	2.05409e+08	1.80468e+08	1.90268e+08	1.79458e+08	37	38	35	37	35	37	1	Met-loss+Acetyl [N-Term]
AAC18038.1	antigen NY-CO-7 [OS=Homo sapiens]	0	70.819	31	8	27	8	303	34.8	5.74	79.12	8	Pf00515, Pf04564, Pf07719, Pf12895, Pf13414, Pf13424, Pf13432, Pf14559	10273	STUB1	16		Androgen receptor signaling pathway; Parkin-Ubiquitin Proteasomal System pathway			2	0	1.705	0.0373907	35.84	124.8	65.3	15.48	18.97	2.27026e+07	2.13122e+07	1.703e+07	1.39365e+07	9.49079e+06	1.06389e+07	7	7	7	6	6	7	1
NP_004956.5	Non-histone chromosomal protein HMG-14 [OS=Homo sapiens]	0	13.719	31	2	6	2	100	10.7	9.6	11.49	2		3150	HMGN1	21	ENSG00000205581.10	ATM Signaling Network in Development and Disease; p38 MAPK Signaling Pathway	Herpes simplex infection	Dual incision in TC-NER; Formation of TC-NER Pre-Incision Complex; Gap-filling DNA repair synthesis and ligation in TC-NER	9	0	1.589	0.523519	16.17	128.3	77.2	15.79	7.31	1.7451e+06	1.43359e+06	1.21317e+06	957744	846330		2	1	1	1	1		1
XP_011528279.1	PREDICTED: adenylosuccinate lyase isoform X1 [OS=Homo sapiens]	0	64.17	31	11	57	11	526	59.3	7.09	101.12	11	Pf00206, Pf10397	158	ADSL	22		Nucleotide Metabolism			1	0	1.232	0.742351	38.33	101.7	103.5	18.25	2.89	4.27993e+07	2.7861e+07	2.97725e+07	3.08936e+07	28584645	2.90885e+07	11	10	11	9	9	11	1	Met-loss+Acetyl [N-Term]
AAF65506.1	HDCMD47P [OS=Homo sapiens]	0	64.11	31	6	65	6	226	25.6	8.73	146.81	6	Pf01323	373156	GSTK1	7					0	0	0.993	0.883937	33.51	84.7	104.9	11.15	5.67	3.06378e+07	2.93634e+07	3.62708e+07	4.02028e+07	3.75552e+07	3.49159e+07	6	6	6	6	6	6	1
AAB58817.1	ladinin [OS=Homo sapiens]	0	73.406	31	12	48	1	517	57.1	9.67	102.72	12		3898	LAD1	1					0	11	0.922	0.709551	34.37	97.6	103.4	22.06	17.37	3.61677e+07	2.30595e+07	2.2947e+07	2.76331e+07	1.91728e+07	2.50752e+07	10	9	9	9	9	11	1
EAW98190.1	cytochrome c oxidase subunit VIa polypeptide 1, isoform CRA_a [OS=Homo sapiens]	0	24.425	31	2	10	2	152	16.8	10.83	8.57	2	Pf02046	1337	COX6A1	12		Electron Transport Chain			1	0	1.265	0.663111	22.23	105.9	83.7	22.44	11	1.55083e+07	2.03802e+07	1.60854e+07	1.22208e+07	1.20797e+07	1.43682e+07	1	1	1	1	1	1	1
NP_006301.3	puromycin-sensitive aminopeptidase isoform 1 [OS=Homo sapiens]	0	161.285	31	20	128	20	919	103.2	5.72	291	20	Pf01433, Pf11838, Pf13485	9520	NPEPPS	17	ENSG00000141279.15			Antigen processing: Ubiquitination & Proteasome degradation	4	0	1.064	0.988452	27.5	100.7	92.6	2.17	11.2	110485411	9.70755e+07	1.09209e+08	8.26789e+07	9.22825e+07	1.0077e+08	18	17	17	17	17	18	1
AAD34112.1	CGI-117 protein [OS=Homo sapiens]	0	18.608	31	5	10	5	178	21.1	9.94	9.41	5	Pf09420	51491	NOP16	5					0	0	0.882	0.566427	25.58	98.9	110.7	12.94	4.77	3.80169e+07	2.80659e+07	28131618	3.44488e+07	3.24828e+07	3.04691e+07	4	4	3	4	4	4	1
AAH14837.1	ribosomal protein L15 [OS=Homo sapiens]	0	51.231	31	7	70	7	204	24.1	11.62	131.84	7	Pf00827	6138	RPL15	3		Cytoplasmic Ribosomal Proteins			1	0	1.069	0.996014	21.32	110.8	89.7	3.76	5.9	3.01123e+08	2.68421e+08	271251892	2.44676e+08	2.19906e+08	2.13058e+08	7	7	6	6	6	7	1
CAG28590.1	NEDD8, partial [OS=Homo sapiens]	0	25.221	31	2	24	1	81	9.1	8.43	57.62	2	Pf00240, Pf11976	4738	NEDD8	14		EGF/EGFR Signaling Pathway			1	0	0.01	1.62313e-16			288.6		31.2				8.06742e+06	1.47122e+07	1.43392e+07				1	1	1	1
AAC41689.1	protein PP4-X [OS=Homo sapiens]	0	60.228	31	9	43	9	321	36	5.87	80.62	9	Pf00191	307	ANXA4	2		Prostaglandin Synthesis and Regulation			1	0	1.19	0.815839	24.47	104.9	99.1	4.92	10.56	4.5255e+07	4.16466e+07	4.10576e+07	4.18564e+07	3.85397e+07	3.30046e+07	6	7	6	7	7	6	1
BAG70238.1	dual specificity phosphatase 3, partial [OS=Homo sapiens]	0	23.826	31	4	14	4	185	20.6	8.15	26.79	4	Pf00102, Pf00782	1845	DUSP3	17					0	0	1.09	0.976787	20.73	102.7	92.4	10.16	20.93	1.07673e+07	1.11841e+07	1.23449e+07	8.20933e+06	1.23328e+07	1.03205e+07	3	4	4	3	4	4	1
BAD97199.1	UV excision repair protein RAD23 homolog B variant, partial [OS=Homo sapiens]	0	121.11	31	8	76	8	409	43.1	4.88	173.17	8	Pf00240, Pf00627, Pf09280, Pf11976, Pf13881	5887	RAD23B	9					0	0	1.256	0.684414	27.64	112.9	93.5	11.55	8.81	1.37917e+08	9.64312e+07	1.12483e+08	9.34514e+07	7.72416e+07	8.79036e+07	8	8	8	8	8	8	1
NP_001164014.1	serine/threonine-protein phosphatase PGAM5, mitochondrial isoform 1 [OS=Homo sapiens]	0	50.422	31	6	36	6	289	32	8.68	73.18	6	Pf00300	192111	PGAM5	12	ENSG00000247077.6		TNF signaling pathway		1	0	0.867	0.505923	30.55	61.2	100.6	16.16	5.08	1.82572e+07	1.88242e+07	2.39866e+07	3.26136e+07	3.02311e+07	3.32259e+07	5	4	5	5	5	5	1
EAX01930.1	Cytochrome c oxidase subunit Vb [OS=Homo sapiens]	0	38.131	31	4	32	4	182	19.4	9.94	73.18	4	Pf01215	1329	COX5B	2		Electron Transport Chain			1	0	1.089	0.9794	26.03	107	80.7	19.2	11.29	45741633	58560977	5.92436e+07	39141033	42483117	47673263	3	3	3	3	3	3	1
NP_001299801.1	cytochrome c oxidase protein 20 homolog isoform 2 [OS=Homo sapiens]	0	15.132	31	3	10	3	130	14.7	8.81	22.47	3	Pf12597	116228	COX20	1	ENSG00000203667.9				0	0	1.267	0.656768	16.6	108.5	87.2	10.19	1.31	9.13161e+06	6952537	7.13214e+06	5892980	5.67774e+06	5.78371e+06	3	3	3	3	3	3	1	Met-loss+Acetyl [N-Term]
AAO34395.1	p50 dynamitin [OS=Homo sapiens]	0	72.929	31	10	57	10	387	42.6	5.15	132.54	10	Pf04912	10540	DCTN2	12					0	0	1.157	0.883937	13.97	103.9	94.2	6.66	8.33	2.47259e+07	2.46676e+07	2.52612e+07	1.99704e+07	2.31179e+07	2.16222e+07	6	7	7	7	6	6	1
NP_004512.1	Kinesin-1 heavy chain [OS=Homo sapiens]	0	168.34	31	22	112	22	963	109.6	6.51	232.26	22	Pf00225, Pf01576, Pf02463, Pf03999, Pf04111, Pf04156, Pf05483, Pf05557, Pf05622, Pf06160, Pf07111, Pf07888, Pf10174, Pf12128, Pf13514, Pf13851, Pf14915	3799	KIF5B	10	ENSG00000170759.10	Insulin Signaling	Endocytosis; Dopaminergic synapse	COPI-dependent Golgi-to-ER retrograde traffic; Kinesins; RHO GTPases activate KTN1; Insulin processing; MHC class II antigen presentation	21	0	1.195	0.804553	45.75	123.6	72.5	3.76	3.76	1.0382e+08	9.76932e+07	101979487	5.8014e+07	5.67738e+07	6.01516e+07	19	21	21	19	18	20	1
NP_004996.1	NADH dehydrogenase [ubiquinone] 1 beta subcomplex subunit 9 isoform 1 [OS=Homo sapiens]	0	12.113	31	3	6	3	179	21.8	8.38	14.25	3	Pf05347, Pf13232	4715	NDUFB9	8	ENSG00000147684.7	Electron Transport Chain; Oxidative phosphorylation	Parkinson's disease; Non-alcoholic fatty liver disease (NAFLD); Alzheimer's disease; Huntington's disease; Metabolic pathways; Oxidative phosphorylation	Complex I biogenesis	13	0	1.091	0.990101	34.62	114.5	81	43.41	37.7	3.28752e+06	1.11486e+06	2928136	1.80161e+06	3.41313e+06	1.9543e+06	2	1	2	2	2	2	1	Met-loss+Acetyl [N-Term]
AAP97173.1	Submergence induced protein 2 [OS=Homo sapiens]	0	22.119	31	4	18	4	179	21.5	5.9	21.9	4	Pf02311, Pf03079, Pf07883	55256	ADI1	2					0	0	1.105	0.965954	35.97	125.4	113.6	19.28	16.05	1.85129e+07	1.09185e+07	1.56116e+07	1.02749e+07	1.34331e+07	1.34738e+07	4	3	4	3	4	4	1
BAA05647.1	proteasome subunit HsN3 [OS=Homo sapiens]	0	61.644	31	6	54	1	264	29.2	5.97	164.1	6	Pf00227	5692	PSMB4	1		Proteasome Degradation			1	5	0.904	0.649911	40.82	94.2	103	3.8	7.47	6.37339e+07	5.48041e+07	6.40168e+07	7.19647e+07	6.28731e+07	6.10787e+07	5	6	6	6	6	6	1
XP_011535061.2	PREDICTED: galectin-3 isoform X1 [OS=Homo sapiens]	0	83.496	31	7	84	7	264	27.8	8.94	153.9	7	Pf00337	3958	LGALS3	14		AGE/RAGE pathway			1	0	1.036	0.958107	37.33	108.7	90.2	12.11	21.44	2.97717e+08	2.09819e+08	2.33509e+08	2.65724e+08	1.81855e+08	1.82659e+08	7	7	7	7	7	7	1
CAG33101.1	PSMB4 [OS=Homo sapiens]	0	60.694	31	6	52	1	264	29.2	5.97	165.8	6	Pf00227	5692	PSMB4	1		Proteasome Degradation			1	0	1.191	0.815138	12.56	116.5	97.9	20.18	3.78	11228264	6753958	8025067	6789985	6403322	6.12468e+06	1	1	1	1	1	1	1
NP_004365.1	Cytochrome c oxidase subunit 6C [OS=Homo sapiens]	0	27.746	31	3	20	3	75	8.8	10.39	48.48	3	Pf02937	1345	COX6C	8	ENSG00000164919.10	Electron Transport Chain	Alzheimer's disease; Non-alcoholic fatty liver disease (NAFLD); Parkinson's disease; Cardiac muscle contraction; Oxidative phosphorylation; Huntington's disease; Metabolic pathways	TP53 Regulates Metabolic Genes; Respiratory electron transport	17	0	1.196	0.803372	35.6	111.7	87.5	3.8	10	18492850	1.61215e+07	1.64158e+07	1.1818e+07	1.41614e+07	1.29486e+07	3	3	3	3	3	3	1	Met-loss [N-Term]
NP_003482.1	N-alpha-acetyltransferase 10 isoform 1 [OS=Homo sapiens]	0	29.403	31	5	14	5	235	26.4	5.64	19	5	Pf00583, Pf08445, Pf13508, Pf13527, Pf13673	8260	NAA10	X	ENSG00000102030.15				0	0	1.07	0.996917	10.01	118.1	74.4	7.29	11.06	2.00426e+07	1.96141e+07	1.86984e+07	1.37242e+07	11400680	10900092	4	3	3	2	2	2	1
AAQ13507.1	MSTP005 [OS=Homo sapiens]	0	106.703	30	14	88	1	564	66.7	6.34	143.69	14	Pf10255	51386	EIF3L	22					0	12	1	0.89225	23.69	103.2	105.2	2.85	14.26	1.32844e+08	1.13885e+08	1.19246e+08	1.40382e+08	1.19943e+08	1.02525e+08	13	12	12	12	12	12	1
BAD96249.1	eukaryotic translation initiation factor 3 subunit 6 interacting protein variant, partial [OS=Homo sapiens]	0	108.761	30	14	81	1	564	66.7	6.24	122.36	14	Pf10255	51386	EIF3L	22					0	0																				1
BAD96601.1	steroid dehydrogenase homolog, partial [OS=Homo sapiens]	0	83.612	30	8	48	8	312	34.3	9.32	112.96	8	Pf00106, Pf03435, Pf08659, Pf13460, Pf13561	51144	HSD17B12	11					0	0	0.932	0.739995	22.14	96.4	99.7	5.98	7.41	7.04022e+07	5.81026e+07	5.92961e+07	6.97897e+07	5.92411e+07	6.16335e+07	8	8	8	7	7	8	1
AAH21297.2	DYNC1H1 protein, partial [OS=Homo sapiens]	0	165.083	30	27	148	1	989	111.7	6.48	291.53	27	Pf03028, Pf12781	1778	DYNC1H1	14					0	0																				1
BAF83833.1	unnamed protein product [OS=Homo sapiens]	0	156.2	30	18	105	18	767	86.3	6.86	234.82	18	Pf01189, Pf13659	54888	NSUN2	5					0	0	1.064	0.988452	40.27	96.3	109.2	15.26	1.78	6.89804e+07	4.49782e+07	5.36045e+07	5.94083e+07	5.62568e+07	5.7313e+07	16	16	16	18	16	18	1
NP_001307256.1	coiled-coil-helix-coiled-coil-helix domain-containing protein 2 precursor isoform 1 [OS=Homo sapiens]	0	48.728	30	4	35	4	168	17.7	10.01	120.2	4	Pf06747	51142	CHCHD2	7					0	0	0.523	0.000196161	20.18	81	151.6	2.27	13.15	2.70186e+07	22872775	2.455e+07	5.60028e+07	44223803	4.35317e+07	3	4	3	4	4	4	1
XP_005249816.1	PREDICTED: 2-oxoglutarate dehydrogenase, mitochondrial isoform X1 [OS=Homo sapiens]	0	147.466	30	21	99	21	1038	117.6	6.92	211.14	21	Pf00676, Pf02779	4967	OGDH	7	ENSG00000105953.14	TCA Cycle and Deficiency of Pyruvate Dehydrogenase complex (PDHc); Amino Acid metabolism; Tryptophan metabolism; TCA Cycle			4	0	1.225	0.753401	42.78	112.7	75.6	4.04	0.9	73154110	6.44208e+07	7.47299e+07	4.52927e+07	4.46261e+07	4.4841e+07	19	19	18	19	17	16	1
NP_001631.3	Acylamino-acid-releasing enzyme [OS=Homo sapiens]	0	78.265	30	13	44	13	732	81.2	5.48	124.61	13	Pf00326, Pf00561, Pf01738, Pf02230, Pf05448, Pf12695, Pf12697	327	APEH	3	ENSG00000164062.12			Eukaryotic Translation Termination; Neutrophil degranulation	6	0	0.98	0.84863	33.95	99.4	101.6	3.53	12.22	5.54776e+07	4.8755e+07	5.6135e+07	4.60433e+07	5.14878e+07	5.72733e+07	10	10	10	10	11	11	1
NP_055814.1	Ras-related protein Rab-21 [OS=Homo sapiens]	0	36.726	30	5	14	5	225	24.3	7.94	35.69	5	Pf00025, Pf00071, Pf08477	23011	RAB21	12	ENSG00000080371.5			RAB GEFs exchange GTP for GDP on RABs; RAB geranylgeranylation	7	0	0.883	0.570605	42.13	74.9	147.3	3.1	38.5	1.90871e+07	1.69057e+07	1.73185e+07	3.45572e+07	3.4908e+07	1.55286e+07	5	5	5	5	5	5	1	Met-loss+Acetyl [N-Term]
ABI58227.1	intracellular platelet-activating factor acetylhydrolase alpha 2 subunit variant 3 [OS=Homo sapiens]	0	59.779	30	3	29	1	202	22.8	6.05	85.07	3	Pf13472	5049	PAFAH1B2	11					0	0	1.271	0.649099	28.69	120.7	95	38.74	10.64	6.16178e+06	1.11849e+07	1.34331e+07	7775470	9094739	9251379	1	1	1	1	1	1	1	Met-loss+Acetyl [N-Term]
BAG60547.1	unnamed protein product [OS=Homo sapiens]	0	63.33	30	8	59	8	308	35.2	5.59	116.89	8	Pf02338, Pf10275	55611	OTUB1	11					0	0	1.034	0.955136	24.39	102.4	97.9	8.42	11.64	4.99327e+07	3.68235e+07	4.4327e+07	34774382	4.29482e+07	3.99987e+07	8	8	8	8	8	8	1
AAG47842.1	glutaminase [OS=Homo sapiens]	0	102.32	30	12	47	12	669	73.4	7.77	103.43	12	Pf04960, Pf12796	2744	GLS	2					0	0	1.378	0.384095	49.21	116.4	59.8	14.23	54.82	7.64051e+07	5.98518e+07	5.44162e+07	2.55671e+07	3.17854e+07	66773441	11	9	9	5	7	7	1
NP_004991.1	NADH dehydrogenase [ubiquinone] 1 alpha subcomplex subunit 5 isoform 1 [OS=Homo sapiens]	0	25.564	30	3	14	3	116	13.5	5.99	21.19	3	Pf04716	4698	NDUFA5	7	ENSG00000128609.14	Electron Transport Chain; Oxidative phosphorylation	Oxidative phosphorylation; Non-alcoholic fatty liver disease (NAFLD); Huntington's disease; Metabolic pathways; Parkinson's disease; Alzheimer's disease	Complex I biogenesis	13	0	1.622	0.0732152	35.89	134	48.7	7.6	69.85	21550952	16748462	1.78045e+07	1.10938e+06	6.28847e+06	7.81713e+06	3	3	3	1	2	3	1
AAC50572.1	translation initiation factor 5 [OS=Homo sapiens]	0	60.821	30	10	52	10	431	49.1	5.58	89.75	10	Pf01873, Pf02020	1983	EIF5	14		Translation Factors			1	0	0.684	0.0447962	31.85	84.3	127.1	3.12	12.27	6.13982e+07	5.07133e+07	5.82016e+07	8.53729e+07	6.6949e+07	8.27526e+07	10	10	10	10	9	10	1
AAD32098.1	heme-binding protein [OS=Homo sapiens]	0	22.659	30	4	13	4	189	21.1	5.8	23.72	4	Pf04832	50865	HEBP1	12					0	0	0.891	0.595786	16.76	84.9	79.8	70.07	30.95	1.13034e+06	4.74098e+06	7283870	6.04743e+06	3.11324e+06	4.56857e+06	1	2	3	3	3	3	1
AAQ01749.1	SGT1B protein [OS=Homo sapiens]	0	73.212	30	8	47	8	365	41	5.16	109.03	8	Pf00515, Pf04969, Pf05002, Pf13414, Pf13431, Pf13432, Pf14559	10910	SUGT1	13					0	0	1.045	0.968415	20.18	102.3	96.4	3.43	1.44	4.13443e+07	37915711	38630469	3.5012e+07	3.51646e+07	3.49447e+07	7	7	7	6	6	6	1	Met-loss+Acetyl [N-Term]
AAQ64005.1	ribonuclease H2 [OS=Homo sapiens]	0	24.543	30	4	9	4	299	33.4	5.17	29.51	4	Pf01351	10535	RNASEH2A	19					0	0	1.201	0.801912	44.55	121.5	90	6.12	2.9	8.03243e+06	6.34613e+06	6.8433e+06	4.91703e+06	5.08216e+06	4.82015e+06	4	4	4	3	3	4	1
XP_005271584.1	PREDICTED: thymocyte nuclear protein 1 isoform X1 [OS=Homo sapiens]	0	30.432	30	7	28	7	266	29.8	9.57	14.08	7	Pf01878	29087	THYN1	11					0	0	1.06	0.98554	19.53	100.6	94	9.1	4.43	2.76675e+07	20127180	2.45151e+07	2.36805e+07	2.13365e+07	2.16074e+07	6	6	6	6	6	6	1
EAW84687.1	LSM4 homolog, U6 small nuclear RNA associated (S. cerevisiae), isoform CRA_b [OS=Homo sapiens]	0	23.928	30	3	11	1	163	17.9	9.95	28.8	3	Pf01423	25804	LSM4	19					0	0	1.832	0.0183415	27.67	130.6	71.3	19.17	29.2	4831492	5.51981e+06	6.776e+06	2.04596e+06	3.69323e+06	3.09089e+06	1	1	1	1	1	1	1
AAA20993.1	NF45 protein [OS=Homo sapiens]	0	89.625	30	8	104	8	406	44.7	8.15	290.73	8	Pf07528	3608	ILF2	1		B Cell Receptor Signaling Pathway			1	0	1.141	0.905161	27.24	107	94.6	1.5	14.11	9.37403e+07	7.94658e+07	8.82226e+07	9.54367e+07	7.40584e+07	7.31629e+07	6	6	5	8	7	8	1
NP_006545.1	metaxin-2 isoform 1 [OS=Homo sapiens]	0	32.451	30	5	17	5	263	29.7	6.29	36.63	5	Pf11801, Pf13410, Pf14497	10651	MTX2	2	ENSG00000128654.13			Cristae formation; Mitochondrial protein import; Metabolism of proteins	5	0	1.151	0.890905	24.93	99.7	99.4	11.64	12.91	7.4387e+06	7.79435e+06	8.8601e+06	6.70979e+06	8.47367e+06	7.97249e+06	4	3	4	3	4	4	1
BAD92940.1	Dihydrolipoamide dehydrogenase, variant, partial [OS=Homo sapiens]	0	123.007	30	12	71	12	520	55.6	8.47	145.02	12	Pf00070, Pf00890, Pf01134, Pf02852, Pf03486, Pf07992, Pf12831, Pf13450	1738	DLD	7		Fatty Acid Beta Oxidation; Glycolysis and Gluconeogenesis; TCA Cycle			3	0	1.231	0.743343	38.74	103	97.6	14.97	8.6	8.56671e+07	6.22209e+07	6.07743e+07	5.94828e+07	6.09307e+07	6.81572e+07	11	9	9	8	9	10	1
NP_077305.2	EF-hand domain-containing protein D2 [OS=Homo sapiens]	0	47.437	30	8	21	8	240	26.7	5.2	44.4	8		79180	EFHD2	1	ENSG00000142634.12				0	0	1.193	0.812031	29.23	101.9	93.7	11.99	2.36	3.33096e+07	2.31561e+07	2.68465e+07	23182189	2.3463e+07	2.3619e+07	6	7	7	6	7	7	1
AAB60433.1	thymopoietin alpha [OS=Homo sapiens]	0	100.532	30	15	68	5	694	75.4	7.47	162.52	15	Pf03020, Pf08198, Pf11560	7112	TMPO	12					0	0	1.287	0.601969	35.2	125.5	70.6	3.41	12.67	1.09037e+07	9.09918e+06	9.68816e+06	5399187	4.6655e+06	5969231	4	4	4	3	2	3	1	Met-loss [N-Term]
AAA59570.1	Macrophage capping protein [OS=Homo sapiens]	0	54.318	30	6	27	6	348	38.5	6.25	83.99	6	Pf00626	822	CAPG	2					0	0	0.82	0.33863	35.6	91.7	116.9	16.37	19.4	2.07456e+07	1.3321e+07	1.57199e+07	2.58642e+07	1.78597e+07	1.89033e+07	6	6	6	6	6	6	1
NP_001257368.1	actin-related protein 2/3 complex subunit 5 isoform 2 [OS=Homo sapiens]	0	20.549	30	3	14	3	154	16.6	6.02	27.7	3	Pf04699	10092	ARPC5	1	ENSG00000162704.15	Pathogenic Escherichia coli infection; Regulation of Actin Cytoskeleton			2	0	1.218	0.771324	36.2	129.2	82.2	28.96	12.05	1.43479e+07	2.20151e+07	2.3834e+07	1.41855e+07	1.72961e+07	14298702	3	3	3	3	3	2	1
NP_002936.1	replication protein A 70 kDa DNA-binding subunit isoform 1 [OS=Homo sapiens]	0	96.752	30	13	82	13	616	68.1	7.21	213.83	13	Pf01336, Pf01485, Pf04057, Pf08646	6117	RPA1	17	ENSG00000132383.11	Homologous recombination; Retinoblastoma (RB) in Cancer; ATR Signaling; G1 to S cell cycle control; DNA Replication; Mismatch repair	Nucleotide excision repair; Homologous recombination; Fanconi anemia pathway; Mismatch repair; DNA replication	Translesion Synthesis by POLH; Mismatch repair (MMR) directed by MSH2:MSH6 (MutSalpha); Activation of the pre-replicative complex; Termination of translesion DNA synthesis; Translesion synthesis by POLI; Formation of Incision Complex in GG-NER; Recognition of DNA damage by PCNA-containing replication complex; Translesion synthesis by REV1; Meiotic recombination; Removal of the Flap Intermediate; …	87	0	1.099	0.968415	32.94	112.4	88	8.51	0.81	5.65878e+07	5.11922e+07	4.71961e+07	4.10909e+07	39623019	3.96946e+07	12	13	11	11	10	11	1	Met-loss [N-Term]
BAF83333.1	unnamed protein product [OS=Homo sapiens]	0	21.815	30	7	32	6	221	25.5	8.65	26.99	7	Pf00076, Pf13893, Pf14259	8683	SRSF9	12		mRNA Processing			1	0	0.898	0.622829	22.18	102.4	109.3	4.92	4.15	2.31012e+07	1.91686e+07	2.30039e+07	2.36261e+07	2.2245e+07	2.11533e+07	6	6	6	6	6	6	1	Met-loss+Acetyl [N-Term]
AAC24947.1	prostate apoptosis response protein PAR-4 [OS=Homo sapiens]	0	48.491	30	5	23	5	342	36.7	5.41	44.84	5	Pf01544, Pf05911, Pf08614	5074	PAWR	12					0	0	1.149	0.89225	23.87	104.9	84.7	12.82	19.48	1.00258e+07	1.12572e+07	1.16111e+07	9.08999e+06	8.67342e+06	1.20377e+07	3	4	4	4	4	4	1
NP_036269.1	N(G),N(G)-dimethylarginine dimethylaminohydrolase 1 isoform 1 [OS=Homo sapiens]	0	23.578	30	5	12	5	285	31.1	5.81	20.83	5	Pf02274	23576	DDAH1	1	ENSG00000153904.18	Mesodermal Commitment Pathway		eNOS activation	5	0	0.879	0.551024	84.9	70.1	107.8	15.97	2.37	7.20383e+06	7.85941e+06	9.44094e+06	1.23565e+07	1.24917e+07	1.2597e+07	4	4	3	3	4	4	1	Met-loss+Acetyl [N-Term]
AAD40193.1	HSPC029 [OS=Homo sapiens]	0	37.337	30	6	34	6	218	25	5.01	37.93	6	Pf03399, Pf10075	27335	EIF3K	19					0	0	1.136	0.91118	33.04	110.9	93.2	1.79	12.68	3.62171e+07	3.27027e+07	3.46275e+07	3.17816e+07	2.7636e+07	23962826	6	6	6	6	6	5	1	Met-loss+Acetyl [N-Term]
AAA52129.1	preprocathepsin B [OS=Homo sapiens]	0	94.629	30	9	51	6	339	37.8	6.3	127.51	9	Pf00112, Pf08127	1508	CTSB	8					0	3	0.947	0.779515	25.18	91.7	96.2	8.21	13.03	70668190	5.57107e+07	5.71359e+07	69707843	6.03881e+07	5.21885e+07	8	8	8	8	8	8	1
NP_001304106.1	MICOS complex subunit MIC19 isoform 1 [OS=Homo sapiens]	0	57.801	30	6	33	6	232	26.7	7.75	59.81	6	Pf05300, Pf06747	54927	CHCHD3	7					0	0	1.57	0.107969	32.09	115.1	73.3	9.38	9.77	4.69867e+07	3.57338e+07	3.74784e+07	2.82005e+07	2.33638e+07	23337877	6	6	6	6	5	6	1
AAP97254.1	Cytoplasmic dynein intermediate chain 2C [OS=Homo sapiens]	0	71.581	30	9	49	9	612	68.3	5.33	119.9	9	Pf00400, Pf11540	1781	DYNC1I2	2					0	0	0.972	0.832129	21.22	102.6	101.3	1.23	3.52	3.08291e+07	2.62876e+07	2.91162e+07	2.68905e+07	2.82785e+07	2.71097e+07	7	7	7	7	6	7	1	Met-loss+Acetyl [N-Term]
BAD93075.1	acid phosphatase 1 isoform c variant, partial [OS=Homo sapiens]	0	13.46	30	3	10	3	165	18.7	7.88	15.79	3	Pf01451	52	ACP1	2		VEGFA-VEGFR2 Signaling Pathway	Adherens junction; Metabolic pathways; Thiamine metabolism		4	0	0.69	0.0533532	41.58	88.6	122.6	7.97	8.1	4.77958e+06	3.77121e+06	3.88461e+06	5.50027e+06	5.40776e+06	4.64097e+06	3	3	2	3	3	3	1
NP_001304111.1	methionine aminopeptidase 2 isoform 2 [OS=Homo sapiens]	0	78.769	30	8	49	3	455	50.5	5.92	107.13	8	Pf00557	10988	METAP2	12	ENSG00000111142.13				0	5	1.192	0.813516	25.93	102.6	92	3.78	8.67	3.77993e+07	3.28831e+07	3.82213e+07	3.42568e+07	3.05701e+07	2.80394e+07	8	6	7	7	7	7	1
NP_006824.2	COP9 signalosome complex subunit 6 [OS=Homo sapiens]	0	39.046	30	6	23	6	327	36.1	5.73	52.67	6	Pf01398, Pf13012	10980	COPS6	7	ENSG00000168090.9	Nucleotide-binding Oligomerization Domain (NOD) pathway		Cargo recognition for clathrin-mediated endocytosis; DNA Damage Recognition in GG-NER; Formation of TC-NER Pre-Incision Complex; Neddylation	14	0	1.07	0.996477	27.04	106.7	100.6	4.18	6.75	1.71145e+07	1.40064e+07	1.64944e+07	1.60507e+07	1.3759e+07	1.445e+07	6	6	6	6	5	6	1
EAX07268.1	poly(A) binding protein, cytoplasmic 4 (inducible form), isoform CRA_h [OS=Homo sapiens]	0	158.713	30	17	121	8	661	72.4	9.35	296.17	17	Pf00076, Pf00658, Pf09606, Pf13893, Pf14259	8761	PABPC4	1					0	0	1.11	0.956094	37.44	97.4	103.1	22.67	6.41	5.44197e+07	3.33693e+07	3.49579e+07	4.10826e+07	3.65174e+07	3.55187e+07	7	8	7	7	6	7	1
AAH03018.1	Unknown (protein for IMAGE:2822726), partial [OS=Homo sapiens]	0	36.412	30	6	24	6	243	25.8	8.1	45.72	6	Pf00106, Pf01488, Pf08659, Pf13460, Pf13561	51181	DCXR	17					0	0	1.051	0.972049	21.5	101.3	88.4	7.54	7.64	2.04438e+07	1.53436e+07	1.80715e+07	1.74108e+07	1.49847e+07	1.48824e+07	6	6	6	6	6	6	1
EAW61102.1	HCG18290 [OS=Homo sapiens]	0	71.41	30	5	63	4	135	15.7	10.95	112.61	5	Pf01655	644907	RPL32P18	7					0	1	1.062	0.988004	19.05	116.4	89.8	12.88	11.05	2.08229e+08	1.41961e+08	1.66976e+08	1.24973e+08	1.10475e+08	1.3671e+08	5	5	5	5	5	5	1
NP_001139699.1	40S ribosomal protein S20 isoform 1 [OS=Homo sapiens]	0	75.981	30	6	76	6	142	16	9.32	114.93	6	Pf00338	6224	RPS20	8	ENSG00000008988.9	Cytoplasmic Ribosomal Proteins			1	0	1.157	0.883937	24.59	106.2	86.8	5.57	12.96	3.66837e+08	3.52924e+08	384586191	3.66877e+08	2.82895e+08	295736749	6	6	6	6	6	6	1	Met-loss+Acetyl [N-Term]
NP_001129166.1	Voltage-dependent anion-selective channel protein 3 isoform 2 [OS=Homo sapiens]	0	38.866	30	8	27	7	284	30.8	8.66	53.5	8	Pf01459	7419	VDAC3	8	ENSG00000078668.13				0	0	0.981	0.852574	24.9	98.6	104.7	17.52	1.55	2.81134e+07	1.86929e+07	1.9629e+07	2.09276e+07	2.06609e+07	1.99073e+07	7	6	7	7	6	7	1	Met-loss+Acetyl [N-Term]
BAD97090.1	serine (or cysteine) proteinase inhibitor, clade B (ovalbumin), member 1 variant, partial [OS=Homo sapiens]	0	67.379	30	9	34	9	379	42.7	6.28	44.22	9	Pf00079	1992	SERPINB1	6					0	0	0.976	0.840847	18.94	106	106.2	3.13	4.03	1.07858e+08	91638467	9.61934e+07	9.85093e+07	89336892	9.41501e+07	8	8	8	7	6	8	1
EAW70091.1	fumarate hydratase, isoform CRA_b [OS=Homo sapiens]	0	90.441	30	9	56	9	511	54.7	8.76	174.86	9	Pf00206, Pf10415	2271	FH	1		TCA Cycle			1	0	1.063	0.988452	28.87	106.6	90.5	7.48	5.28	4.56e+07	3.56805e+07	3.76426e+07	3.18197e+07	3.4185e+07	3.10691e+07	8	8	8	8	8	8	1
NP_001186708.1	proteasome subunit beta type-2 isoform 2 [OS=Homo sapiens]	0	24.272	30	4	23	2	176	20.2	7.44	45.57	4	Pf00227	5690	PSMB2	1		Proteasome Degradation			1	0	0.772	0.191132	59.96	112.2	98.5	8.64	8.01	2.96691e+07	2.49084e+07	2.37969e+07	2.09428e+07	2.41007e+07	2.24267e+07	2	2	2	2	2	2	1
BAG61335.1	unnamed protein product [OS=Homo sapiens]	0	97.27	30	16	101	16	616	69.7	5.67	103.8	16	Pf00076, Pf14259	1975	EIF4B	12		Translation Factors; Interferon type I signaling pathways			2	0	1.164	0.870299	49.08	103.7	98.7	2.79	14.97	1.13654e+08	9.41407e+07	1.03518e+08	1.13432e+08	9.36121e+07	8.21336e+07	12	12	13	13	13	13	1
NP_683710.1	protein ABHD11 isoform 1 [OS=Homo sapiens]	0	40.325	30	7	21	7	315	34.7	9.48	41.8	7	Pf00561, Pf00756, Pf07819, Pf12695, Pf12697	83451	ABHD11	7	ENSG00000106077.18				0	0	1.032	0.951643	18.03	96.9	105.6	27.94	5.25	2.36736e+07	1.39631e+07	1.35143e+07	1.60522e+07	1.64855e+07	1.47319e+07	7	7	6	6	6	6	1
EAW74828.1	nuclear mitotic apparatus protein 1, isoform CRA_f [OS=Homo sapiens]	0	371.274	30	42	225	42	2124	239.1	5.74	667.59	42	Pf04111, Pf07888, Pf12128	4926	NUMA1	11					0	0	1.192	0.813643	39.59	108.3	98.4	6.06	4.21	1.27752e+08	1.25763e+08	1.31548e+08	1.18947e+08	1.13583e+08	1.06501e+08	35	36	37	33	35	35	1
XP_016881552.1	PREDICTED: gamma-soluble NSF attachment protein isoform X3 [OS=Homo sapiens]	0	46.125	30	5	31	1	227	25.3	4.84	123.66	5	Pf14938	8774	NAPG	18					0	0	1.096	0.975788	35.06	94	85.8	18.94	27.74	879853	1.12839e+06	1.09474e+06	968539	707780	1.23408e+06	1	1	1	1	1	1	1	Met-loss [N-Term]
AAC97189.1	spliceosomal protein SAP 155 [OS=Homo sapiens]	0	235.558	29	30	159	11	1304	145.7	7.03	404.09	30	Pf02161, Pf08920, Pf12815, Pf13513	23451	SF3B1	2		mRNA Processing			1	19	1.185	0.826041	35.25	111.1	88.9	4.29	3.14	1.10335e+08	1.04187e+08	1.12507e+08	8.34192e+07	8.55038e+07	8.62635e+07	29	29	29	26	25	29	1
NP_002815.3	parathymosin isoform 2 [OS=Homo sapiens]	0	29.379	29	4	24	4	102	11.5	4.16	28.11	4		5763	PTMS	12	ENSG00000159335.15				0	0	0.823	0.346236	47.48	98	105.7	26.29	8.02	6.9363e+07	9.14032e+07	1.13365e+08	1.00869e+08	1.01858e+08	1.13885e+08	3	3	4	4	3	3	1	Met-loss+Acetyl [N-Term]
AAA60306.1	splicing factor [OS=Homo sapiens]	0	54.44	29	6	36	5	221	25.6	11.88	114.74	6	Pf00076, Pf13893, Pf14259	6427	SRSF2	17		mRNA Processing			1	1	1.092	0.972875	28.58	109.4	101.9	8.1	11.04	7.42511e+07	5.52332e+07	6.41123e+07	6.82324e+07	5.67469e+07	5.41831e+07	4	5	4	5	5	5	1	Met-loss+Acetyl [N-Term]
EAW56972.1	biliverdin reductase B (flavin reductase (NADPH)), isoform CRA_d [OS=Homo sapiens]	0	30.812	29	4	13	4	211	22.6	7.59	22.26	4	Pf01073, Pf01370, Pf13460	645	BLVRB	19					0	0	0.789	0.240187	32.31	71.4	137.4	51.92	8.74	7.58044e+06	3.7729e+06	2.49883e+06	8838532	7.49698e+06	7.39103e+06	4	2	2	4	4	4	1
AAB61211.1	Acyl-CoA thioester hydrolase [OS=Homo sapiens]	0	68.735	29	8	46	8	372	40.8	8.16	102.63	8	Pf03061	11332	ACOT7	1					0	0	1.031	0.950497	26.33	101.9	102.4	0.6	9.73	4.43432e+07	3.9048e+07	4.25868e+07	3.56675e+07	4.05477e+07	4.19504e+07	8	8	8	7	8	8	1	Met-loss+Acetyl [N-Term]
Q9NZL4.1	RecName: Full=Hsp70-binding protein 1; Short=HspBP1; AltName: Full=Heat shock protein-binding protein 1; AltName: Full=Hsp70-binding protein 2; Short=HspBP2; AltName: Full=Hsp70-interacting protein 1; AltName: Full=Hsp70-interacting protein 2 [OS=Homo sapiens]	0	53.12	29	7	43	7	362	39.4	5.21	98.38	7		23640	HSPBP1	19			Protein processing in endoplasmic reticulum		1	0	0.965	0.815128	29.07	95.8	106.8	10.75	9.05	2.18824e+07	2.10676e+07	2.57339e+07	2.20824e+07	2.42739e+07	2.57491e+07	7	7	7	6	7	7	1
AAA72127.1	CTP:phosphocholine cytidylyltransferase [OS=Homo sapiens]	0	46.003	29	8	30	8	367	41.7	6.86	52.14	8	Pf01467	5130	PCYT1A	3		Acetylcholine Synthesis			1	0	0.913	0.67969	25.68	103.1	104.8	23.6	15.29	1.12299e+07	1.39746e+07	1.73095e+07	1.16744e+07	1.46766e+07	1.53101e+07	6	7	8	5	5	7	1
BAF83546.1	unnamed protein product [OS=Homo sapiens]	0	140.138	29	18	72	18	900	101.1	6.16	154.98	18	Pf00043, Pf00133, Pf00458, Pf09334, Pf10978, Pf13409, Pf13410, Pf14497	4141	MARS	12					0	0	0.996	0.890905	41.34	91.7	102.5	8.34	8.58	9.7489e+07	7.7563e+07	7.84276e+07	1.04457e+08	8.95513e+07	8.70351e+07	16	16	16	15	15	18	1
NP_001171725.1	extended synaptotagmin-1 isoform 1 [OS=Homo sapiens]	0	175.99	29	21	127	21	1114	123.9	5.78	349.61	21	Pf00168	23344	ESYT1	12	ENSG00000139641.12				0	0	1.03	0.949661	26.68	96	102.7	7.84	3.64	1.20409e+08	9.0048e+07	1.04185e+08	1.0807e+08	1.06966e+08	9.91975e+07	16	16	18	17	18	17	1
ABQ50603.1	non-functional aryl hydrocarbon receptor interacting protein, partial [OS=Homo sapiens]	0	52.917	29	7	45	7	368	40.7	6.34	91.05	7	Pf00254	9049	AIP	11					0	0	1.215	0.776317	16.43	116	92.9	6.28	4.07	4.29652e+07	4.02769e+07	4.62667e+07	3.54241e+07	3.33358e+07	3.17708e+07	6	7	7	7	6	7	1
BAD96827.1	protein kinase, interferon-inducible double stranded RNA dependent activator variant, partial [OS=Homo sapiens]	0	44.48	29	5	28	5	313	34.4	8.41	79.34	5	Pf00035, Pf14709	8575	PRKRA	2					0	0	1.185	0.826242	26.57	99.2	108.3	19.69	38.06	1.86533e+07	1.092e+07	1.48723e+07	7.39535e+06	1.60503e+07	1.53192e+07	5	5	5	5	5	5	1
ABB73038.1	FHL2 isoform 5 [OS=Homo sapiens]	0	78.501	29	8	54	8	389	44.1	8.1	126.96	8	Pf00412	2274	FHL2	2		Androgen receptor signaling pathway; RANKL/RANK (Receptor activator of NFKB (ligand)) Signaling Pathway; Ectoderm Differentiation; VEGFA-VEGFR2 Signaling Pathway	Osteoclast differentiation		5	0	0.806	0.292125	37.48	93.5	108.6	13.54	16.28	3.7516e+07	26478032	28048353	4.09664e+07	2.9726e+07	3.15699e+07	5	5	5	6	6	6	1
XP_011522203.1	PREDICTED: platelet-activating factor acetylhydrolase IB subunit alpha isoform X2 [OS=Homo sapiens]	0	69.819	29	8	60	8	428	48.7	7.06	108.72	8	Pf00400, Pf08513, Pf11715	5048	PAFAH1B1	17		Wnt Signaling Pathway and Pluripotency; Wnt Signaling Pathway			2	0	1.027	0.941295	42.27	103.2	99.6	12	6.14	49034896	3.52859e+07	3.77724e+07	3.85417e+07	3.51709e+07	3.32047e+07	8	8	8	8	8	8	1
NP_005309.1	Histone H1.0 [OS=Homo sapiens]	0	48.879	29	6	30	6	194	20.9	10.84	59.79	6	Pf00538	3005	H1F0	22	ENSG00000189060.5			Formation of Senescence-Associated Heterochromatin Foci (SAHF); Activation of DNA fragmentation factor	10	0	1.132	0.917292	20.06	81.3	138.5	10.57	20.66	8.41232e+07	6.25967e+07	6.58501e+07	1.51028e+08	1.10099e+08	1.00723e+08	4	5	5	7	6	6	1	Met-loss+Acetyl [N-Term]; Acetyl [N-Term]
NP_004076.1	Mitochondrial import inner membrane translocase subunit Tim8 A isoform 1 [OS=Homo sapiens]	0	20.737	29	3	16	3	97	11	5.16	45.33	3	Pf02953	1678	TIMM8A	X	ENSG00000126953.5			Mitochondrial protein import; Metabolism of proteins	2	0	0.836	0.392002	21.09	73.9	108.6	29.77	22.44	9.95254e+06	5.06559e+06	6.216e+06	9.7853e+06	6.08132e+06	8.62268e+06	3	2	2	3	2	3	1
AAQ13671.1	MSTP145 protein [OS=Homo sapiens]	0	13.093	29	2	8	2	149	16.5	6.38	32.28	2	Pf13419	58478	ENOPH1	4	ENSG00000145293.15				0	0	1.392	0.737199	27.57	110.9	87.1	10.82	39.91	2.17406e+06	1565878	1.74031e+06	658677	1.29815e+06	1.53135e+06	2	2	2	2	2	2	1
EAX00328.1	hCG1818387 [OS=Homo sapiens]	0	18.065	29	4	12	1	132	14.5	6.74	19.62	4	Pf01248	391370	RPS12P4	2					0	0																				1
AAH40224.1	adenylate kinase 3-like 1 [OS=Homo sapiens]	0	25.289	29	3	10	3	223	25.2	8.56	32.14	3	Pf00406, Pf05191, Pf13207, Pf13238, Pf13671	205	AK4	1					0	0	0.821	0.340948	43.09	90.8	103.8	3.01	1.89	1.20284e+07	9.96431e+06	1.08549e+07	1.23947e+07	1.17865e+07	1.16477e+07	3	3	3	3	3	3	1
BAD96524.1	threonyl-tRNA synthetase variant, partial [OS=Homo sapiens]	0	181.386	29	15	112	15	723	83.4	6.67	315.1	15	Pf00587, Pf02824, Pf03129, Pf07973	6897	TARS	5					0	0	0.923	0.711123	28.14	94.6	104.1	5.14	9.05	7.55523e+07	6.20858e+07	7.48329e+07	8.36833e+07	7.49969e+07	6.79169e+07	13	13	13	14	14	14	1
BAD92471.1	Isoleucyl-tRNA synthetase, cytoplasmic variant, partial [OS=Homo sapiens]	0	132.915	29	24	83	24	1279	146.3	6.35	146.86	24	Pf00133, Pf01406, Pf08264, Pf09334	3376	IARS	9					0	0	0.917	0.692589	23.82	93.4	111.1	3.7	8.51	7.2404e+07	5.87266e+07	6.58674e+07	7.61552e+07	7.45074e+07	6.36252e+07	18	20	18	23	22	21	1
AAH30019.2	PRPS2 protein, partial [OS=Homo sapiens]	0	69.833	29	7	49	4	346	38	8.13	152.48	7	Pf00156, Pf13793, Pf14572	5634	PRPS2	X		Nucleotide Metabolism			1	0	1.384	0.371899	28.77	127.6	73.4	20.22	17.15	9.89214e+06	8.13372e+06	6.29392e+06	4.92958e+06	4.75371e+06	6.32424e+06	4	4	3	4	4	4	1
CAE11897.1	Small nuclear ribonucleoprotein Sm D1 [OS=Homo sapiens]	0	27.516	29	2	27	2	119	13.3	11.56	60.53	2	Pf01423	6632	SNRPD1	18		mRNA Processing			1	0	1.05	0.972049	9.36	101.8	99.4	16.84	2.85	47295054	5.40484e+07	6.26718e+07	5.38421e+07	5.58588e+07	5.41357e+07	1	2	2	2	2	2	1
NP_789782.1	Charged multivesicular body protein 4b [OS=Homo sapiens]	0	35.579	29	7	27	7	224	24.9	4.82	58.3	7	Pf03357	128866	CHMP4B	20	ENSG00000101421.3		Endocytosis	Budding and maturation of HIV virion; Macroautophagy; Endosomal Sorting Complex Required For Transport (ESCRT)	12	0	0.997	0.890905	50.7	110.3	93.6	12.17	21.31	4.04407e+07	44902330	4.24498e+07	3.89575e+07	3.42342e+07	2.45676e+07	5	5	4	5	4	4	1
NP_006347.1	ATP synthase subunit d, mitochondrial isoform a [OS=Homo sapiens]	0	22.059	29	4	31	4	161	18.5	5.3	53.93	4	Pf05873	10476	ATP5H	17	ENSG00000167863.11	Electron Transport Chain; Oxidative phosphorylation	Huntington's disease; Alzheimer's disease; Oxidative phosphorylation; Parkinson's disease; Metabolic pathways	Cristae formation; Formation of ATP by chemiosmotic coupling	14	0	1.188	0.819358	28.91	98.4	91.3	13.49	33.73	1.86527e+07	1.34132e+07	1.37872e+07	6903353	1.35341e+07	12766014	4	4	4	4	4	4	1
AAH66917.1	Ubiquitin-conjugating enzyme E2D 3 (UBC4/5 homolog, yeast) [OS=Homo sapiens]	0	31.233	29	2	9	2	147	16.7	7.8	36.49	2	Pf00179, Pf14461	7323	UBE2D3	4		Proteasome Degradation			1	0	1.046	0.968415	18.76	103.5	106.6	29.46	10.72	1.47385e+07	8.43073e+06	8250954	9.159e+06	7879507	9.70282e+06	1	2	1	1	1	2	1
AAP97260.1	Cytochrome c oxidase VIIc [OS=Homo sapiens]	0	5.467	29	1	3	1	63	7.3	11	3.32	1	Pf02935								0	0	1.494	0.586223	11.93	109.1	70.9	6.26	8.43	1.92651e+06	1905704	1.97632e+06	1.18672e+06	1.21943e+06	1.35706e+06	1	1	1	1	1	1	1
NP_004508.1	integrin-linked protein kinase isoform 1 [OS=Homo sapiens]	0	60.383	29	11	50	11	452	51.4	8.07	91.16	11	Pf00023, Pf00069, Pf07714, Pf12796, Pf13606, Pf13637, Pf13857	3611	ILK	11	ENSG00000166333.13	Integrin-mediated Cell Adhesion; Primary Focal Segmental Glomerulosclerosis FSGS; Focal Adhesion; Factors and pathways affecting insulin-like growth factor (IGF1)-Akt signaling; PPAR signaling pathway; Eukaryotic Transcription Initiation	Axon guidance; Endometrial cancer; Bacterial invasion of epithelial cells; PPAR signaling pathway; Focal adhesion	Localization of the PINCH-ILK-PARVIN complex to focal adhesions	15	0	1.132	0.917292	43	106.2	81.5	2.12	15.35	4.40326e+07	3.7883e+07	4.29504e+07	3.10939e+07	3.0391e+07	3.90231e+07	10	9	9	8	8	9	1
AAQ96862.1	unknown [OS=Homo sapiens]	0	59.443	29	8	50	8	368	41.8	6.47	121.22	8	Pf04095	10135	NAMPT	7	ENSG00000105835.11	Adipogenesis; NAD metabolism, sirtuins and aging; NAD+ metabolism; NAD+ biosynthetic pathways			4	0	0.752	0.147423	34.93	93.4	115.8	7.63	12.69	6.63284e+07	4.9696e+07	5.84903e+07	8.38891e+07	6.4749e+07	6.83651e+07	7	7	7	7	7	7	1
BAA95667.1	Leucyl tRNA synthetase [OS=Homo sapiens]	0	117.328	28	21	74	21	1176	134.3	7.2	156.12	21	Pf00133, Pf01406, Pf08264, Pf09334	51520	LARS	5					0	0	0.942	0.765431	46.24	93.5	102.3	3.88	1.96	5.03378e+07	4.59648e+07	5.16423e+07	5.47959e+07	5.19448e+07	5.15217e+07	17	18	19	18	19	17	1
BAG37798.1	unnamed protein product [OS=Homo sapiens]	0	62.78	28	8	32	8	288	32.9	7.17	62.33	8		8624	PSMG1	21					0	0	1.26	0.678643	99.6	142	49.2	5.14	30.16	3.39582e+07	3.03174e+07	2.98562e+07	1.08301e+07	1.00708e+07	1.67391e+07	6	7	7	7	7	6	1	Met-loss+Acetyl [N-Term]
AAG28784.1	EH domain-containing protein FKSG7 [OS=Homo sapiens]	0	67.2	28	10	35	9	541	61.2	8.27	86.32	10	Pf00350, Pf01926, Pf12763	30844	EHD4	15					0	1	1.107	0.961785	22.73	109.9	77.9	5.81	10.93	2.90829e+07	2.55959e+07	2.50324e+07	1.61204e+07	1.95924e+07	1.84634e+07	10	10	10	7	9	8	1
CAG46834.1	BCAS2 [OS=Homo sapiens]	0	25.364	28	4	12	4	225	26.1	5.66	44.88	4	Pf05700	10286	BCAS2	1					0	0	1.464	0.226925	19.69	148.7	19	1.35	64.93	1.91087e+07	1.71333e+07	1.8331e+07	731901	2.22586e+06	3.47993e+06	4	4	4	1	2	4	1
CAD62364.1	unnamed protein product, partial [OS=Homo sapiens]	0	33.911	28	3	38	1	176	18.5	7.39	126.81	3	Pf00462	51218	GLRX5	14					0	2	1.119	0.941589	29.38	81.7	109.4	21.6	15.12	9.40757e+06	8.22388e+06	12759289	8.92689e+06	1.13825e+07	1.15586e+07	3	3	3	3	3	3	1
NP_001317398.1	coatomer subunit epsilon isoform d [OS=Homo sapiens]	0	63.623	28	7	43	7	331	36.9	5.16	88.61	7	Pf04733	11316	COPE	19	ENSG00000105669.13				0	0	1.026	0.941066	33.22	99.9	99.2	6.92	8.13	21860614	2.05868e+07	2.38425e+07	2.07852e+07	2.3736e+07	2.09662e+07	5	6	7	7	7	7	1
NP_054706.1	vinculin isoform meta-VCL [OS=Homo sapiens]	0	141.217	28	23	85	23	1134	123.7	5.66	188.31	23	Pf01044	7414	VCL	10	ENSG00000035403.17	Integrin-mediated Cell Adhesion; Primary Focal Segmental Glomerulosclerosis FSGS; Focal Adhesion; VEGFA-VEGFR2 Signaling Pathway; Regulation of Actin Cytoskeleton	Adherens junction; Shigellosis; Regulation of actin cytoskeleton; Amoebiasis; Bacterial invasion of epithelial cells; Leukocyte transendothelial migration; Focal adhesion	Signaling by BRAF and RAF fusions; MAP2K and MAPK activation; Smooth Muscle Contraction; Signaling by RAS mutants; Signaling by high-kinase activity BRAF mutants; Signaling by moderate kinase activity BRAF mutants; Platelet degranulation ; Paradoxical activation of RAF signaling by kinase inactive BRAF; Neutrophil degranulation; Interleukin-20 family signaling	37	0	0.921	0.706893	29.8	98.9	104.5	3.62	2.6	7.65042e+07	6.90432e+07	6.98456e+07	7.3887e+07	7.29129e+07	7.54014e+07	15	18	17	17	16	20	1
AAC78729.1	eukaryotic translation initiation factor eIF3, p35 subunit [OS=Homo sapiens]	0	37.317	28	5	15	5	258	29	4.86	91.1	5	Pf08597	8669	EIF3J	15		Translation Factors			1	0	0.869	0.514899	18.61	87.9	114.7	9.4	12.26	9.6901e+06	1.00864e+07	1.07742e+07	1.49392e+07	1.1439e+07	1.32575e+07	3	3	3	4	3	4	1
NP_071496.1	Eukaryotic translation initiation factor 4H isoform 1 [OS=Homo sapiens]	0	76.754	28	5	53	5	248	27.4	7.23	126.74	5	Pf00076, Pf13893, Pf14259	7458	EIF4H	7	ENSG00000106682.14	Translation Factors		L13a-mediated translational silencing of Ceruloplasmin expression; Translation initiation complex formation; GTP hydrolysis and joining of the 60S ribosomal subunit; Ribosomal scanning and start codon recognition	10	0	1.13	0.919801	16.9	112	96	2.6	1.52	8.44933e+07	7.18824e+07	76156746	6.53468e+07	6.2234e+07	6.3227e+07	5	5	5	4	4	5	1	Met-loss+Acetyl [N-Term]
NP_057130.1	exosome complex component CSL4 isoform a [OS=Homo sapiens]	0	20.361	28	4	16	4	195	21.4	8.24	34.29	4	Pf10447, Pf14382	51013	EXOSC1	10	ENSG00000171311.12		RNA degradation	Major pathway of rRNA processing in the nucleolus and cytosol; mRNA decay by 3' to 5' exoribonuclease; ATF4 activates genes; Butyrate Response Factor 1 (BRF1) binds and destabilizes mRNA; Tristetraprolin (TTP, ZFP36) binds and destabilizes mRNA; KSRP (KHSRP) binds and destabilizes mRNA	15	0	1.022	0.933651	19.92	106.6	96.2	12.07	7.49	9.48016e+06	7.22933e+06	7.08603e+06	6.87851e+06	7.46019e+06	6.41221e+06	4	4	4	4	4	4	1
AAH09927.1	C1orf151 protein, partial [OS=Homo sapiens]	0	3.902	28	1	2	1	39	4.4	9.73	0	1	Pf04418	440574	MINOS1	1					0	0	1.584	0.157933	51.73	105.2	95.5	27.84	65.58	6.38987e+06	3434173	3.98742e+06	640008	3.63973e+06	3.41617e+06	1	1	1	1	1	1	1
NP_001036024.3	eukaryotic translation initiation factor 4 gamma 2 isoform 2 [OS=Homo sapiens]	0	107.66	28	18	96	1	869	98.1	6.99	153.72	18	Pf02020, Pf02847, Pf02854	1982	EIF4G2	11		Exercise-induced Circadian Regulation			1	0	0.716	0.17184	14	79.6	111.2	4.43	12.72	2.32488e+06	1.94316e+06	2.30912e+06	3.34931e+06	2.54047e+06	2.90884e+06	1	1	1	1	1	1	1
ALQ34050.1	vacuolar protein sorting 33-like protein B isoform 3 [OS=Homo sapiens]	0.002	3.05	28	1	1	1	71	7.9	6.52	4.32	1		26276	VPS33B	15					0	0	0.922	0.800154	9.04	82	88.9	15.23	18.89	818517	944880	822979	864222	800754	1115118	1	1	1	1	1	1	1	Met-loss+Acetyl [N-Term]
NP_525127.1	Protein S100-A16 [OS=Homo sapiens]	0	38.66	28	5	30	5	103	11.8	6.79	30.53	5	Pf01023, Pf13202, Pf13499, Pf13833	140576	S100A16	1	ENSG00000188643.10				0	0	1.177	0.83995	27.64	104.2	100.7	12.94	20.46	2.51175e+07	1.88293e+07	1.84868e+07	2.66967e+07	1.85322e+07	1.86655e+07	4	4	4	5	5	5	1
AAA61209.1	DNA topoisomerase II [OS=Homo sapiens]	0	227.21	28	32	161	27	1531	174.3	8.72	364.21	32	Pf00204, Pf00521, Pf01751, Pf02518, Pf08070	7153	TOP2A	17		Gastric Cancer Network 1; Gastric cancer network 2; Retinoblastoma (RB) in Cancer			3	5	1.099	0.968415	32.58	116.2	97	6.18	11.14	1.44173e+08	1.22971e+08	1.21598e+08	9.01016e+07	1.09186e+08	1.05352e+08	24	24	24	23	24	25	1	Acetyl [N-Term]
NP_006798.1	Chromobox protein homolog 1 [OS=Homo sapiens]	0	31.91	28	4	35	3	185	21.4	4.93	67.03	4	Pf00385, Pf01393	10951	CBX1	17	ENSG00000108468.14				0	0	1.13	0.918252	31.72	115.3	85.8	18.69	6.58	1.63162e+07	2.06137e+07	2.10869e+07	1.47158e+07	16350461	1.4805e+07	3	3	3	2	3	2	1
BAG64064.1	unnamed protein product [OS=Homo sapiens]	0	133.336	28	20	110	3	980	110.2	7.94	213.81	20	Pf02020, Pf02847, Pf02854	1982	EIF4G2	11		Exercise-induced Circadian Regulation			1	15	0.957	0.801912	28.17	100	96.9	3.94	10.46	1.03133e+08	8.38288e+07	9.19619e+07	9.75557e+07	8.46613e+07	7.72005e+07	17	17	18	17	17	16	1
BAD93097.1	spectrin, alpha, non-erythrocytic 1 (alpha-fodrin) variant, partial [OS=Homo sapiens]	0	498.233	28	53	337	53	2506	288	5.36	994.05	53	Pf00018, Pf00036, Pf00435, Pf07653, Pf08239, Pf08726, Pf13405, Pf13499, Pf14604	6709	SPTAN1	9		Fas Ligand (FasL) pathway and Stress induction of Heat Shock Proteins (HSP) regulation			1	0	1.33	0.491737	29.95	116.1	89.3	1.28	6.97	3.16157e+08	2.69431e+08	2.94499e+08	2.15678e+08	2.3993e+08	2.13668e+08	47	47	47	45	46	46	1
NP_003357.2	cytochrome b-c1 complex subunit 2, mitochondrial precursor [OS=Homo sapiens]	0	68.161	28	9	30	9	453	48.4	8.63	83.72	9	Pf00675, Pf05193	7385	UQCRC2	16; CHR_HG926_PATCH	ENSG00000140740.10; ENSG00000284493.1	Electron Transport Chain	Cardiac muscle contraction; Alzheimer's disease; Non-alcoholic fatty liver disease (NAFLD); Huntington's disease; Metabolic pathways; Oxidative phosphorylation; Parkinson's disease	Respiratory electron transport	12	0	1.319	0.521712	34.79	121.2	63.5	8.73	18.35	3.90599e+07	4.05345e+07	3.98842e+07	1.47224e+07	2.05503e+07	1.97176e+07	7	8	7	6	7	7	1
BAD96982.1	DDX19-like protein variant, partial [OS=Homo sapiens]	0	43.519	28	7	21	7	478	53.9	6.8	54.65	7	Pf00270, Pf00271	55308	DDX19A	16					0	0	1.08	0.988452	17.14	106.5	71.4	12.12	31.04	13208664	1.16582e+07	1.01393e+07	8152121	6.71291e+06	1.19208e+07	4	3	4	2	2	3	1
BAG35362.1	unnamed protein product [OS=Homo sapiens]	0	111.804	28	12	86	12	546	59.2	4.36	161.34	12	Pf00481	5496	PPM1G	2		mRNA Processing			1	0	1.114	0.950928	23.92	102.6	103.8	11.99	6.24	1.03903e+08	7.97076e+07	7.77044e+07	8.50289e+07	8.42134e+07	7.45097e+07	11	11	11	11	12	12	1
AAC35008.1	cellular apoptosis susceptibility protein [OS=Homo sapiens]	0	229.807	28	25	183	25	971	110.3	5.87	430.42	25	Pf03378, Pf03810, Pf08506	1434	CSE1L	20					0	0	1.034	0.955118	24.67	102.7	103.8	4.88	4.52	6.41278e+08	5.08869e+08	5.72267e+08	5.72972e+08	5.49351e+08	5.10593e+08	22	22	22	22	23	23	1	Acetyl [N-Term]
ABQ59034.1	Rab11b protein [OS=Homo sapiens]	0	29.402	28	6	39	6	218	24.5	6.24	59.85	6	Pf00025, Pf00071, Pf01926, Pf08477, Pf13401	9230	RAB11B	19					0	0	0.88	0.556828	20.06	94.7	100.2	2.72	2.47	6.61559e+07	5.94526e+07	61236025	6.44113e+07	6.50416e+07	6.14823e+07	6	6	6	6	6	6	1	Met-loss+Acetyl [N-Term]
BAC11187.1	unnamed protein product [OS=Homo sapiens]	0	46.187	28	9	48	9	361	39.9	9.36	51.05	9	Pf00153	5250	SLC25A3	12					0	0	1.167	0.862287	33.72	110.8	88.4	9.45	8.28	1.45046e+08	1.26554e+08	1.16314e+08	9.76443e+07	1.12964e+08	1.03533e+08	8	8	8	6	8	8	1
NP_001346.1	D-dopachrome decarboxylase [OS=Homo sapiens]	0	10.777	28	2	8	2	118	12.7	7.3	18.75	2	Pf01187	1652	DDT	22; CHR_HSCHR22_1_CTG7	ENSG00000099977.13; ENSG00000275003.3				0	0	1.057	0.981982	2.83	101.2	102.6	6.6	1.75	6.4752e+06	6.32043e+06	6.1396e+06	5.97075e+06	5.99788e+06		1	1	1	2	2		1	Met-loss [N-Term]
AAH68974.1	Splicing factor 3b, subunit 3, 130kDa [OS=Homo sapiens]	0	186.983	28	23	125	23	1217	135.4	5.26	322.6	23	Pf03178, Pf10433	23450	SF3B3	16		mRNA Processing			1	0	1.071	0.99814	29.28	103.8	97	4.93	5.19	1.2173e+08	9.62952e+07	1.1083e+08	9.62243e+07	1.04506e+08	9.76377e+07	20	20	21	21	21	21	1
CAO94662.1	Coronin-1C_i2 protein [OS=Homo sapiens]	0	99.652	28	12	83	12	480	54	7.25	187.23	12	Pf00400, Pf08953, Pf08954	23603	CORO1C	12	ENSG00000110880.10				0	0	1.139	0.910767	31.05	110	85.8	8.27	2.12	1.97913e+08	1.77348e+08	1.64717e+08	1.38021e+08	1.39318e+08	139949964	12	12	12	11	11	10	1
NP_057535.1	Coatomer subunit beta [OS=Homo sapiens]	0	164.309	28	15	104	15	953	107.1	6.05	274.79	15	Pf01602, Pf07718, Pf14806	1315	COPB1	11	ENSG00000129083.12			COPI-dependent Golgi-to-ER retrograde traffic; Neutrophil degranulation; COPI-mediated anterograde transport	14	0	1.001	0.896423	24.83	94.2	117	2.05	7.14	5.45667e+07	4.64784e+07	4.97518e+07	6.09241e+07	60520381	5.26217e+07	11	11	12	12	11	11	1
AAF37203.1	mRNA-binding protein CRDBP [OS=Homo sapiens]	0	104.118	28	12	80	11	577	63.4	9.2	185.92	12	Pf00013, Pf00076, Pf13014, Pf13893, Pf14259	10642	IGF2BP1	17		Brain-Derived Neurotrophic Factor (BDNF) signaling pathway			1	1	1.081	0.988452	29.77	113.1	82.9	7.28	13	1.01365e+08	7.83916e+07	8.48613e+07	7.42412e+07	5.94033e+07	5.73273e+07	10	10	10	9	8	10	1
NP_444252.1	profilin-2 isoform a [OS=Homo sapiens]	0	31.607	28	4	30	4	140	15	6.99	53.04	4	Pf00235	5217	PFN2	3	ENSG00000070087.13	Association Between Physico-Chemical Features and Toxicity Associated Pathways	Regulation of actin cytoskeleton; Shigellosis; Rap1 signaling pathway; Salmonella infection	RHO GTPases Activate Formins; Signaling by ROBO receptors	12	0	1.023	0.937759	14.84	104.5	101.3	23.8	9.68	3.18131e+07	1.8539e+07	2.07326e+07	1.68817e+07	1.91001e+07	19863613	4	3	3	3	3	3	1
BAG37316.1	unnamed protein product [OS=Homo sapiens]	0	251.804	28	20	192	20	876	97.1	4.78	462.93	20	Pf02985, Pf03810, Pf13513, Pf13646	3837	KPNB1	17					0	0	1.017	0.920557	35.59	98.9	91.2	10.24	2.95	3.2993e+08	3.48902e+08	3.72464e+08	3.33109e+08	3.36024e+08	3.14453e+08	20	20	18	17	18	19	1	Acetyl [N-Term]
AAF25479.1	nudix hydrolase NUDT5 [OS=Homo sapiens]	0	30.233	28	6	26	6	219	24.2	4.82	51.37	6	Pf00293	11164	NUDT5	10					0	0	1.006	0.905117	23.77	93.6	103.9	9.52	5.4	2.79878e+07	2.30434e+07	3.01163e+07	2.62012e+07	2.80121e+07	2.82072e+07	5	6	6	6	6	6	1	Acetyl [N-Term]
AAC50210.3	DNA dependent protein kinase catalytic subunit [OS=Homo sapiens]	0	621.673	28	86	456	86	4097	465.3	7.2	1054.05	86	Pf00454, Pf02259, Pf02260, Pf08163	5591	PRKDC	8		Cell Cycle; Retinoblastoma (RB) in Cancer; Fas Ligand (FasL) pathway and Stress induction of Heat Shock Proteins (HSP) regulation			3	0	1.037	0.958259	28.05	102.6	101.1	4.89	5.53	4.69646e+08	3.74789e+08	4.42105e+08	3.83929e+08	4.14272e+08	4.1217e+08	74	75	77	76	77	75	1
AAG02116.1	Steroid receptor RNA activator isoform 3 [OS=Homo sapiens]	0	23.773	28	4	13	4	237	25.8	7.46	21.5	4	Pf07304	10011	SRA1	5					0	0	1.1	0.968415	22.57	109.4	85.4	15.16	16.75	1.95782e+07	1.28674e+07	1.50502e+07	1.48373e+07	1.08721e+07	1.10739e+07	4	4	4	3	3	4	1
BAG64814.1	unnamed protein product [OS=Homo sapiens]	0	23.305	28	4	35	3	115	13.1	9.57	26.39	4	Pf02773	4144	MAT2A	2		Trans-sulfuration and one carbon metabolism			1	0	1.108	0.957754	15.05	102.6	90.1	11	6.16	2.03824e+07	1.49844e+07	1.58997e+07	1.49197e+07	1.29445e+07	1.34959e+07	3	3	3	3	3	3	1
CAH18695.1	Hypothetical protein [OS=Homo sapiens]	0	153.327	28	22	134	22	1071	123.3	6.06	308.43	22	Pf03810, Pf08389, Pf08767	7514	XPO1	2					0	0	1.048	0.969763	35.76	109.4	98.3	6.38	7.34	1.58775e+08	1.22351e+08	1.45934e+08	1.12376e+08	1.24559e+08	1.25224e+08	18	19	18	17	17	19	1
BAF84523.1	unnamed protein product [OS=Homo sapiens]	0	24.121	28	3	9	3	187	21.9	5.8	22.83	3	Pf02312	865	CBFB	16					0	0	1.282	0.786756	32.71	124.2	85.7	9.58	15.63	3.76363e+06	3.03865e+06	2.94801e+06	1694185	2.24174e+06	2.15028e+06	2	2	2	1	2	2	1
EAW65686.1	phosphorylase, glycogen; liver (Hers disease, glycogen storage disease type VI), isoform CRA_b [OS=Homo sapiens]	0	93.024	28	18	79	13	850	97.5	7.18	114.54	18	Pf00343	5836	PYGL	14		TNF alpha Signaling Pathway; Glycogen Metabolism			2	1	1.049	0.970938	24.64	99.5	109.9	4.89	1.08	6.18277e+07	4.91234e+07	5.49054e+07	5.87643e+07	5.70683e+07	5.78805e+07	9	10	10	12	12	12	1	Met-loss+Acetyl [N-Term]
CAA77178.1	cathepsin B, partial [OS=Homo sapiens]	0	52.088	28	4	29	1	195	21.2	5.48	68.8	4	Pf00112	1508	CTSB	8					0	0																				1
BAG63427.1	unnamed protein product [OS=Homo sapiens]	0	46.95	28	8	20	8	336	37.5	8.44	34.47	8	Pf04641	51507	RTFDC1	20					0	0	1.79	0.0161674	49.22	162.8	53.2	36.33	62.18	1.38853e+07	1.13824e+07	6.1637e+06	3.9185e+06	2.68037e+06	8.52875e+06	6	7	6	5	4	7	1
NP_073591.2	sideroflexin-1 isoform 1 [OS=Homo sapiens]	0	50.404	28	8	35	8	322	35.6	9.07	80.29	8	Pf03820	94081	SFXN1	5	ENSG00000164466.12				0	0	1.139	0.908974	38.06	108.7	90.5	15.16	8.08	3.84593e+07	2.61049e+07	28320078	2.29284e+07	24405558	2.06113e+07	6	6	6	6	6	6	1	Met-loss+Acetyl [N-Term]
NP_004199.1	apoptosis-inducing factor 1, mitochondrial isoform AIF precursor [OS=Homo sapiens]	0	104.594	28	12	64	12	613	66.9	8.95	143.22	12	Pf00070, Pf07992, Pf14721, Pf14962	9131	AIFM1	X	ENSG00000156709.13	Apoptosis Modulation and Signaling; Nanomaterial induced apoptosis; Apoptosis Modulation by HSP70	Apoptosis		4	0	1.249	0.701916	29.03	117.3	79.9	2.45	27.12	1.07348e+08	9.55162e+07	106992254	6.8589e+07	9.40403e+07	5.54101e+07	10	10	10	10	10	9	1
AAA52423.1	Farnesyl pyrophosphate synthetase [OS=Homo sapiens]	0	105.851	27	9	51	9	353	40.5	5.17	135.44	9	Pf00348	2224	FDPS	1		Cholesterol Biosynthesis			1	0	0.81	0.303	17.02	87.1	106.8	6.07	2	6.45529e+07	6.03716e+07	6.92218e+07	77323486	7.87382e+07	7.5962e+07	9	9	9	9	9	9	1	Acetyl [N-Term]
Q9NX58.2	RecName: Full=Cell growth-regulating nucleolar protein [OS=Homo sapiens]	0	44.535	27	10	25	10	379	43.6	9.54	37.5	10	Pf08790	55646	LYAR	4					0	0	1.407	0.324944	64.7	131.2	53.4	63.48	99.48	3.62613e+07	7.23315e+07	24024500	1.03396e+07	5.90345e+07	1.32327e+07	9	8	8	4	5	5	1	Met-loss [N-Term]
EAX08777.1	succinate-CoA ligase, ADP-forming, beta subunit, isoform CRA_c [OS=Homo sapiens]	0	42.594	27	9	32	9	463	50.3	7.42	54.05	9	Pf00549, Pf01071, Pf02222, Pf08442, Pf13535, Pf13549	8803	SUCLA2	13					0	0	1.186	0.823857	22.54	115.3	86.8	9.49	3.84	4.35937e+07	3.63764e+07	3.43598e+07	2.9668e+07	2.83033e+07	2.6744e+07	9	9	8	9	9	9	1
NP_002818.1	tyrosine-protein phosphatase non-receptor type 1 isoform 1 [OS=Homo sapiens]	0	80.73	27	9	38	9	435	49.9	6.27	98.1	9	Pf00102, Pf00782	5770	PTPN1	20	ENSG00000196396.9	Leptin signaling pathway; Prolactin Signaling Pathway; VEGFA-VEGFR2 Signaling Pathway; Angiopoietin Like Protein 8 Regulatory Pathway; Insulin Signaling	Adherens junction; Insulin signaling pathway; Insulin resistance	Regulation of IFNA signaling; Negative regulation of MET activity; Regulation of IFNG signaling; PTK6 Down-Regulation; Integrin alphaIIb beta3 signaling; Growth hormone receptor signaling	28	0	0.977	0.843089	26.82	96	105.9	6.28	12.14	2.94509e+07	2.52914e+07	3.08363e+07	2.44659e+07	30241655	2.90973e+07	9	8	8	8	8	8	1	Acetyl [N-Term]
EAX03475.1	casein kinase 2, beta polypeptide, isoform CRA_d [OS=Homo sapiens]	0	34.078	27	3	18	3	234	26.9	5.96	60.76	3	Pf01214	1460	CSNK2B	6; CHR_HSCHR6_MHC_SSTO_CTG1; CHR_HSCHR6_MHC_DBB_CTG1; CHR_HSCHR6_MHC_QBL_CTG1; CHR_HSCHR6_MHC_MANN_CTG1; CHR_HSCHR6_MHC_MCF_CTG1; CHR_HSCHR6_MHC_COX_CTG1	ENSG00000224774.7; ENSG00000230700.9; ENSG00000206406.9; ENSG00000204435.13; ENSG00000232960.10; ENSG00000224398.7; ENSG00000228875.8				0	0	0.996	0.890519	15.45	114.8	84.4	10.44	12.49	7.34693e+06	5.42531e+06	7.21199e+06	3.97242e+06	4.87444e+06	4.84361e+06	3	3	3	1	2	2	1
BAA13603.1	proteasome inhibitor hPI31 subunit [OS=Homo sapiens]	0	44.478	27	4	35	4	271	29.8	5.74	100.52	4	Pf08577, Pf11566	9491	PSMF1	20					0	0	1.073	0.99814	19.42	104.7	97.8	13.76	10.9	1.76945e+07	1.23182e+07	1.32954e+07	1.32954e+07	1.18888e+07	1.03878e+07	4	3	4	4	4	3	1	Met-loss+Acetyl [N-Term]
NP_001032248.1	acyl-coenzyme A thioesterase 9, mitochondrial isoform a precursor [OS=Homo sapiens]	0	66.415	27	10	31	10	448	50.8	8.53	67.41	10	Pf03061	23597	ACOT9	X	ENSG00000123130.16				0	0	1.071	0.99814	30.89	108	89.5	11.46	5.17	2.94075e+07	3.18584e+07	3.38996e+07	2.72477e+07	2.81823e+07	2.52292e+07	9	9	9	10	9	9	1
NP_004887.2	vacuolar protein sorting-associated protein 26A isoform 1 [OS=Homo sapiens]	0	28.363	27	6	12	6	327	38.1	6.57	14.56	6	Pf03643	9559	VPS26A	10	ENSG00000122958.14		Endocytosis	WNT ligand biogenesis and trafficking	4	0	0.91	0.672424	20.24	127.7	90.3	17.53	7.64	1.41068e+07	9.18811e+06	1.00312e+07	6.13452e+06	6.97555e+06	6.69256e+06	4	4	4	3	3	3	1
AAS78571.1	200 kDa U5 snRNP-specific spliceosomal protein [OS=Homo sapiens]	0	268.427	27	38	151	38	2136	244.4	6.06	357.47	38	Pf00270, Pf00271, Pf02889, Pf04851	23020	SNRNP200	2					0	0	1.141	0.905161	34.87	109.7	93.5	5.05	5.95	1.44174e+08	1.14057e+08	1.33381e+08	1.02549e+08	1.07963e+08	1.12372e+08	32	32	32	28	29	31	1
NP_001231639.1	glutamine--fructose-6-phosphate aminotransferase [isomerizing] 1 isoform 1 [OS=Homo sapiens]	0	74.659	27	14	54	14	699	78.8	7.11	89.99	14	Pf00310, Pf01380, Pf13230, Pf13522, Pf13537, Pf13580	2673	GFPT1	2	ENSG00000198380.12		Insulin resistance; Amino sugar and nucleotide sugar metabolism; Metabolic pathways; Alanine, aspartate and glutamate metabolism	XBP1(S) activates chaperone genes; Defective GFPT1 causes CMSTA1; Synthesis of UDP-N-acetyl-glucosamine	17	0	0.829	0.368248	34.95	97.8	101.6	4.62	19.25	4.44706e+07	3.57432e+07	3.91793e+07	5.27794e+07	3.67257e+07	3.83809e+07	12	10	11	12	10	12	1	Met-loss [N-Term]
CAH56351.1	hypothetical protein, partial [OS=Homo sapiens]	0	10.682	27	2	10	2	81	9.2	8.46	12.03	2	Pf04095, Pf09972	10135	NAMPT	7		Adipogenesis			1	0																				1
AAH17408.1	enoyl Coenzyme A hydratase 1, peroxisomal [OS=Homo sapiens]	0	48.013	27	6	43	6	328	35.7	8.22	108.99	6	Pf00378	1891	ECH1	19		Fatty Acid Biosynthesis			1	0	0.787	0.234396	23.85	77.9	125.1	8.9	10.21	20481525	1.52036e+07	1.69682e+07	2.48142e+07	2.5894e+07	2.93934e+07	5	5	5	5	5	5	1
BAG70182.1	replication factor C 2 isoform 1, partial [OS=Homo sapiens]	0	26.804	27	6	17	6	354	39.2	6.44	41.38	6	Pf00004, Pf01078, Pf01443, Pf03215, Pf05496, Pf08542, Pf13086, Pf13173, Pf13177, Pf13191, Pf13207, Pf13238, Pf13245, Pf13401	5982	RFC2	7		DNA Replication			1	0	1.256	0.683494	20.48	105.6	83.7	21.49	12.13	1.07168e+07	1.39451e+07	1.12744e+07	7.40539e+06	8.49698e+06	9.19403e+06	4	5	5	3	4	5	1
BAG64911.1	unnamed protein product [OS=Homo sapiens]	0	34.033	27	5	51	4	236	26.5	7.59	120.02	5	Pf00025, Pf00071, Pf08477	998	CDC42	1		Androgen receptor signaling pathway; Integrin-mediated Cell Adhesion; RANKL/RANK (Receptor activator of NFKB (ligand)) Signaling Pathway; Leptin signaling pathway; Pathogenic Escherichia coli infection; RalA downstream regulated genes; B Cell Receptor Signaling Pathway; AGE/RAGE pathway; Brain-Derived Neurotrophic Factor (BDNF) signaling pathway; Focal Adhesion; TGF-beta Signaling Pathway; MAPK S…			18	0	1.112	0.954682	27.33	101.5	88.4	4.12	6.05	5.63372e+07	52526548	57789123	48278801	5.2041e+07	4.62898e+07	4	3	3	3	3	4	1
AAH08723.1	Asparagine synthetase [OS=Homo sapiens]	0	75.509	27	11	55	11	561	64.4	6.77	111.89	11	Pf00310, Pf00733, Pf12481, Pf13522, Pf13537	440	ASNS	7		Photodynamic therapy-induced unfolded protein response			1	0	0.595	0.00374258	43.51	72.2	108.7	19.71	39.9	6.26974e+07	3.90671e+07	4.34925e+07	1.15499e+08	5.73109e+07	6.17452e+07	8	8	9	9	9	10	1
EAW63034.1	thioredoxin-like 1, isoform CRA_a [OS=Homo sapiens]	0	34.319	27	5	32	5	325	36.7	4.88	70.53	5	Pf00085, Pf06201, Pf13098	9352	TXNL1	18					0	0	1.131	0.917292	30.5	111.4	64.6	7.73	36.57	25021210	2.43021e+07	2.76883e+07	14850678	1.15701e+07	2.29682e+07	5	5	5	4	4	5	1	Met-loss [N-Term]
NP_065108.1	Fructose-2,6-bisphosphatase TIGAR [OS=Homo sapiens]	0	22.042	27	4	14	4	270	30	7.69	40.14	4	Pf00300	57103	C12orf5; TIGAR	12	ENSG00000078237.6		Central carbon metabolism in cancer; Fructose and mannose metabolism	TP53 Regulates Metabolic Genes	7	0	1.094	0.972049	15.62	129.3	54.4	37.78	15.75	5.02772e+06	9.88402e+06	9485625	3.53456e+06	4.67546e+06	3.7652e+06	3	3	3	2	3	2	1
NP_001308018.1	COP9 signalosome complex subunit 1 isoform 3 [OS=Homo sapiens]	0	84.774	27	12	49	12	559	62.3	6.32	139.88	12	Pf01399, Pf10602	2873	GPS1	17					0	0	1.3	0.571271	46.54	110.6	93.2	9.06	9.49	4.1679e+07	3.09381e+07	3.43046e+07	2.80125e+07	2.91279e+07	2.39364e+07	11	10	10	9	9	10	1
NP_001244970.1	histidine--tRNA ligase, cytoplasmic isoform 3 [OS=Homo sapiens]	0	70.14	27	13	46	13	489	54.8	5.54	69.31	13	Pf00458, Pf00587, Pf03129, Pf13393	3035	HARS	5	ENSG00000170445.12	Allograft Rejection			1	0	1.024	0.939474	26.67	104.8	101.8	4.95	2.71	1.51452e+08	1.23061e+08	1.30947e+08	1.27036e+08	1.23557e+08	1.17477e+08	12	13	13	13	13	13	1
EAX07292.1	c-myc binding protein, isoform CRA_c [OS=Homo sapiens]	0	10.485	27	3	7	3	126	14	5.91	8.61	3		26292	MYCBP	1					0	0	1.442	0.265877	23.91	120.5	75.8	15.65	12.37	7.70828e+06	5692282	5.35722e+06	3776697	4.29166e+06	3.34159e+06	2	2	2	2	2	2	1
NP_001245238.1	probable 28S rRNA (cytosine(4447)-C(5))-methyltransferase isoform 3 [OS=Homo sapiens]	0	129.467	27	17	123	17	845	92.8	9.19	198.46	17	Pf01189, Pf12847, Pf13900	4839	NOP2	12	ENSG00000111641.11	Imatinib and Chronic Myeloid Leukemia			1	0	0.889	0.59099	23.85	94.3	94.3	4.72	8.21	1.31162e+08	1.05584e+08	1.14933e+08	1.2545e+08	1.05384e+08	1.08414e+08	17	17	17	16	17	16	1
XP_016865173.1	PREDICTED: 40S ribosomal protein S14 isoform X1 [OS=Homo sapiens]	0	79.339	27	6	66	6	178	19.2	9.23	176.94	6	Pf00411	6208	RPS14	5		Cytoplasmic Ribosomal Proteins			1	0	1.224	0.757509	27.39	90.9	99.5	4.18	7.14	2.6465e+08	2.12916e+08	2.38134e+08	2.65572e+08	2.47799e+08	2.24131e+08	6	6	6	6	6	6	1
EAX00219.1	tumor-associated calcium signal transducer 1, isoform CRA_b [OS=Homo sapiens]	0	106.01	27	10	66	10	390	42.8	8.9	244.48	10	Pf00086	4072	EPCAM	2					0	0	0.85	0.441722	52.22	86.9	98.7	21.98	22.08	5.19595e+07	3.15748e+07	3.43672e+07	5.22771e+07	3.44367e+07	3.68067e+07	9	7	7	9	8	7	1
XP_006723627.1	PREDICTED: inosine triphosphate pyrophosphatase isoform X1 [OS=Homo sapiens]	0	17.665	27	4	6	4	238	26.3	9.06	17.93	4	Pf01725	3704	ITPA	20					0	0	1.233	0.83995	53.21	89.2	122.9	7.37	6.49	2.60525e+06	1.96202e+06	2.3221e+06	3.37617e+06	2.91676e+06	3.01725e+06	2	2	2	3	3	3	1
EAW92950.1	huntingtin interacting protein 2, isoform CRA_d [OS=Homo sapiens]	0	20.527	27	5	20	5	212	23.8	5.44	45.82	5	Pf00179, Pf00627	3093	UBE2K	4					0	0	0.9	0.632805	24.91	95.1	104.8	5.1	1.56	1.79405e+07	1.59216e+07	1.87191e+07	1.84909e+07	1.79969e+07	1.8403e+07	5	5	5	5	5	5	1
NP_001099008.1	myb-binding protein 1A isoform 1 [OS=Homo sapiens]	0	214.198	27	28	128	28	1332	149.3	9.28	277.5	28	Pf04931, Pf05793, Pf11593, Pf12815	10514	MYBBP1A	17	ENSG00000132382.14	Energy Metabolism			1	0	1.039	0.965442	43.06	102.1	95.1	4.53	7.92	1.06005e+08	8.51662e+07	9.98576e+07	9.97676e+07	8.84049e+07	8.31716e+07	24	25	24	22	23	24	1
BAA19920.1	UMP synthase [OS=Homo sapiens]	0	47.054	27	9	19	9	480	52.2	7.24	35.1	9	Pf00156, Pf00215	7372	UMPS	3		Fluoropyrimidine Activity			1	0	0.907	0.65683	27.89	97.6	107.8	2.53	13.1	2.8324e+07	2.35169e+07	2.64108e+07	2.28519e+07	2.77138e+07	2.86492e+07	8	9	9	8	9	9	1
NP_057006.1	sterol-4-alpha-carboxylate 3-dehydrogenase, decarboxylating [OS=Homo sapiens]	0	38.279	27	6	22	6	373	41.9	8.06	40.73	6	Pf00106, Pf01073, Pf01370, Pf02719, Pf04321, Pf05368, Pf07993, Pf13460	50814	NSDHL	X	ENSG00000147383.10	Cholesterol Biosynthesis	Steroid biosynthesis; Metabolic pathways	Cholesterol biosynthesis	7	0	0.775	0.19988	36.43	73	111.3	16.19	12.33	8.86555e+06	5.64768e+06	6.90408e+06	8.25544e+06	1.01908e+07	9.93313e+06	5	4	5	4	4	5	1	Acetyl [N-Term]
XP_005258516.1	PREDICTED: heterogeneous nuclear ribonucleoprotein U-like protein 1 isoform X1 [OS=Homo sapiens]	0	146.342	27	16	89	16	866	96.8	6.92	201.68	16	Pf00622, Pf02037, Pf13671	11100	HNRNPUL1	19					0	0	1.113	0.952467	19.53	113.4	92.3	3.59	10.99	7.46853e+07	6.92457e+07	7.0726e+07	6.58882e+07	5.48549e+07	5.23576e+07	13	14	13	13	13	12	1
NP_001278798.1	insulin-like growth factor 2 mRNA-binding protein 2 isoform c [OS=Homo sapiens]	0	102.696	27	11	72	9	605	66.7	8.46	164.09	11	Pf00013, Pf00076, Pf13014, Pf13083, Pf13893, Pf14259	10644	IGF2BP2	3	ENSG00000073792.15				0	1	0.85	0.441485	40.3	103.6	99.5	14.92	13.57	3.96992e+07	4.65915e+07	4.74091e+07	3.8723e+07	4.32878e+07	4.94225e+07	8	9	9	9	8	9	1
BAA06808.1	alanyl-tRNA synthetase [OS=Homo sapiens]	0	121.061	27	18	77	18	968	106.7	5.49	151.07	18	Pf01411, Pf02272, Pf07973	16	AARS	16					0	0	0.884	0.571869	28.22	94.3	104	5.78	11.98	5.9827e+07	4.6527e+07	5.36748e+07	6.64526e+07	5.1539e+07	5.57949e+07	14	12	14	16	14	16	1
AAH08913.1	thioredoxin domain containing 12 (endoplasmic reticulum) [OS=Homo sapiens]	0	24.773	27	4	26	4	172	19.2	5.74	39.2	4	Pf00085, Pf13098, Pf13899, Pf13905	51060	TXNDC12	1					0	0	1.119	0.941295	16.96	118.1	90	15.19	10.3	1.83027e+07	1.21098e+07	1.73643e+07	1.32431e+07	1.25737e+07	1.05744e+07	4	3	4	3	3	3	1
NP_062543.1	heterogeneous nuclear ribonucleoprotein H2 [OS=Homo sapiens]	0	99.324	27	9	110	4	449	49.2	6.3	279.87	9	Pf00076, Pf08080, Pf14259	3188	HNRNPH2	X	ENSG00000126945.8	mRNA Processing		mRNA Splicing - Major Pathway	5	0	1.015	0.917292	20.85	110.9	94.5	4.8	7.31	2.59627e+07	2.45888e+07	2.68912e+07	2.48482e+07	2.16475e+07	2.12315e+07	3	3	3	4	4	4	1
EAW56368.1	seryl-tRNA synthetase, isoform CRA_d [OS=Homo sapiens]	0	60.623	27	9	61	9	539	61.7	7.06	122.31	9	Pf00587, Pf02403	6301	SARS	1					0	0	0.911	0.675024	34.2	95.6	100.4	6.77	4.12	4.09409e+07	3.1271e+07	3.58612e+07	3.65088e+07	3.66613e+07	3.35606e+07	9	9	9	7	7	9	1	Met-loss [N-Term]
AAH54036.1	cytidine deaminase [OS=Homo sapiens]	0	17.345	27	2	4	2	146	16.2	6.07	14.95	2	Pf00383, Pf08211, Pf14421	978	CDA	1		Fluoropyrimidine Activity			1	0	0.605	0.0933562	45.32	81	134	40.42	3.77	1270379	1.59728e+06	744172	1.84078e+06	1.94372e+06	1.88068e+06	1	1	1	1	1	1	1
NP_001278357.1	apoptosis regulator BAX isoform 1 [OS=Homo sapiens]	0	34.221	27	5	18	5	221	24.3	5.64	36.69	5	Pf00452	581	BAX	19		TP53 Network; Leptin signaling pathway; TNF alpha Signaling Pathway; Amyotrophic lateral sclerosis (ALS); Apoptosis; Photodynamic therapy-induced HIF-1 survival signaling			6	0	1.262	0.673764	26.35	116	84.7	3.34	5.27	1.82971e+07	1.56686e+07	1.81797e+07	1.22936e+07	1.10226e+07	1.20461e+07	3	3	4	3	3	4	1
ABO32290.1	TDP43 [OS=Homo sapiens]	0	111.81	27	11	70	11	416	45	6.34	174.69	11	Pf00076, Pf13893, Pf14259	23435	TARDBP	1					0	0	0.95	0.787659	64.23	93	93.9	3.53	13.23	7.78955e+07	6.82096e+07	7.86844e+07	7.26722e+07	6.62863e+07	8.45944e+07	11	11	11	10	10	11	1
Q96HC4.5	RecName: Full=PDZ and LIM domain protein 5; AltName: Full=Enigma homolog; AltName: Full=Enigma-like PDZ and LIM domains protein [OS=Homo sapiens]	0	71.148	27	11	40	1	596	63.9	8.21	67.33	11	Pf00412, Pf00595, Pf13180	10611	PDLIM5	4	ENSG00000163110.14			Neurexins and neuroligins	3	0	0.874	0.708062	18.08	93.1	106.5	23.88	10.18	825376	1.06524e+06	1.2731e+06	1127980	1259006	1.34598e+06	1	1	1	1	1	1	1
AAI06055.1	Aldehyde dehydrogenase 18 family, member A1 [OS=Homo sapiens]	0	107.381	27	16	76	16	795	87.3	7.12	146.02	16	Pf00171, Pf00696	5832	ALDH18A1	10		Urea cycle and metabolism of amino groups			1	0	1.142	0.904538	28.33	100	86.4	5.29	8.92	8.19459e+07	7.95243e+07	8.19544e+07	6.10289e+07	6.72613e+07	7.09415e+07	14	15	15	16	15	14	1
BAD92238.1	H2A histone family, member V isoform 1 variant, partial [OS=Homo sapiens]	0	43.037	27	4	187	2	150	15.4	10.71	130.27	4	Pf00125	94239	H2AFV	7					0	0	1.14	0.906128	33.27	115.2	82.4	12.06	14.33	1.2723e+08	8.71195e+07	1.09981e+08	9.41574e+07	7.1009e+07	7.41486e+07	2	2	2	2	2	2	1
NP_060755.1	U3 small nucleolar ribonucleoprotein protein IMP3 [OS=Homo sapiens]	0	18.475	27	3	7	3	184	21.8	9.5	19.46	3	Pf01479	55272	IMP3	15	ENSG00000177971.8		Ribosome biogenesis in eukaryotes	Major pathway of rRNA processing in the nucleolus and cytosol; rRNA modification in the nucleus and cytosol	6	0	0.883	0.717201	18.43	99.5	97.7	18.32	10.14	1.58668e+06	996586	1.53206e+06	1.43322e+06	1.37532e+06	1.63578e+06	2	1	2	1	1	2	1
CAA09375.1	Thioredoxin-like protein [OS=Homo sapiens]	0	53.085	27	7	44	7	335	37.5	5.31	90.22	7	Pf00085, Pf00462, Pf02114, Pf02966, Pf04908, Pf13098, Pf13905	10539	GLRX3	10					0	0	1.054	0.976326	24.07	103.3	102.7	7.04	0.49	4.60798e+07	3.7182e+07	4.65691e+07	4.20956e+07	4.16431e+07	4.1033e+07	7	6	7	7	7	7	1
AAH05960.1	ATP synthase, H+ transporting, mitochondrial F0 complex, subunit B1 [OS=Homo sapiens]	0	47.825	27	5	24	5	256	28.8	9.45	47.59	5	Pf05405	515	ATP5F1	1		Electron Transport Chain; Oxidative phosphorylation			2	0	1.334	0.482481	40.69	110.1	84.6	21.71	6.17	4.3039e+07	2.69954e+07	27901030	2.12988e+07	2.34454e+07	2.12755e+07	5	5	5	5	5	5	1
NP_001273196.1	heme oxygenase 2 isoform a [OS=Homo sapiens]	0	46.64	26	6	24	6	370	41.6	5.44	44.41	6	Pf01126	3163	HMOX2	16; CHR_HSCHR16_3_CTG1	ENSG00000103415.11; ENSG00000277424.4				0	0	0.897	0.621061	15.57	87.9	100	17.1	3.47	2.41508e+07	1.50408e+07	18884667	2.08313e+07	2.0372e+07	2.14865e+07	4	4	5	5	5	5	1
AAH50473.1	TPM1 protein, partial [OS=Homo sapiens]	0	130.816	26	9	98	2	287	32.6	5.02	298.25	9	Pf00261, Pf12718	7168	TPM1	15		Striated Muscle Contraction			1	0	1.49	0.188525	37.14	134.4	78.1	29.35	13.88	9.52331e+06	1.52426e+07	1.49917e+07	6.7738e+06	8282404	8.64486e+06	2	2	2	2	2	2	1
XP_011512974.1	PREDICTED: serpin B6 isoform X1 [OS=Homo sapiens]	0	43.633	26	9	33	9	454	51.2	6.34	44.79	9	Pf00079	5269	SERPINB6	6					0	0	0.946	0.777627	31.4	90.9	110.7	16.35	16.7	1.73399e+07	1.82637e+07	2.29167e+07	1.79284e+07	2.44282e+07	2.2832e+07	6	8	8	8	8	8	1
NP_001312.1	Cysteine and glycine-rich protein 2 [OS=Homo sapiens]	0	19.438	26	3	14	3	193	20.9	8.62	30.82	3	Pf00412	1466	CSRP2	12	ENSG00000175183.9	Mesodermal Commitment Pathway; H19 action Rb-E2F1 signaling and CDK-beta-catenin activity			2	0	1.001	0.890905	52.66	93.9	92.5	35.19	11.75	2.3204e+06	4.29814e+06	3.83942e+06	3.54491e+06	4.29721e+06	3.56574e+06	2	3	3	3	3	3	1
[truncated: 2,681 more rows]
