# Supplementary material for: A subset of CB002 xanthine analogs bypass p53-signaling to restore a p53 transcriptome and target an S-phase cell cycle checkpoint in tumors with mutated-p53
Source: eLife. 2021 Jul 29;10:e70429. doi: 10.7554/eLife.70429 (PMC8321552; doi:10.7554/eLife.70429)
Supplement: Supplementary file 2. — The present table includes gene names without the FDR of <0.05 filter and therefore referred as all genes. Genes that met the FDR of <0.05 filter are referred as the differentially expressed genes (DEGs). Gene names from the data sets were compared to the Fisher Table S3 data set referred as the known p53 target gene set (Fischer, 2017). [file elife-70429-supp2.xlsx]

## Sheet: Gene List From Figure 2A
Gene List From Figure 2A-2B
All genes tested (9,882)	Differentially expressed genes (DEG) SW480 DMSO vs Analogue #4 (3,362)	Known p53 genes in DEG (102)	Known p53 Targets from Fischer data set (343)
DDIT4	DDIT4	DDIT4	CDKN1A
LAMP3	LAMP3	DUSP5	RRM2B
SGPP2	SGPP2	GDF15	MDM2
DUSP5	DUSP5	SESN2	SUSD6
FAM129A	FAM129A	CLDN1	GDF15
TRIB3	TRIB3	SEMA3B	BTG2
CCNE2	CCNE2	JAG1	DDB2
UPP1	UPP1	PRKAB2	GADD45A
LOC100507639	LOC100507639	GADD45A	PLK3
GDF15	GDF15	E2F7	TIGAR
E2F8	E2F8	NFKBIA	RPS27L
GRB10	GRB10	TP73	TNFRSF10B
VEGFA	VEGFA	FAM84B	TRIAP1
SFRP5	SFRP5	APAF1	ZMAT3
KRT81	KRT81	RGS16	BAX
TNFRSF9	TNFRSF9	DDB2	PGF
FAM111B	FAM111B	SERPINB5	POLH
UCA1	UCA1	PCNA	PPM1D
SESN2	SESN2	MYOF	SULF2
SLC26A9	SLC26A9	CROT	XPC
CLDN1	CLDN1	CPEB4	AEN
AREG	AREG	FOSL1	BLOC1S2
SLFN5	SLFN5	POLH	FAS
CTH	CTH	LIF	GPR87
ATP2B4	ATP2B4	ABTB2	NINJ1
SEMA3B	SEMA3B	PHLDA3	PLK2
CACNB1	CACNB1	FAM49A	PSTPIP2
PLAT	PLAT	TM7SF3	SESN1
JAG1	JAG1	CPEB2	TP53I3
KIF20A	KIF20A	ATF3	TP53INP1
HIST1H2BF	HIST1H2BF	BHLHE40	ABCA12
PRKAB2	PRKAB2	DDR1	ANKRA2
TNFAIP2	TNFAIP2	SARS	CCNG1
SKP2	SKP2	KCNN4	CYFIP2
SLC6A9	SLC6A9	FHL2	DRAM1
HIST1H1B	HIST1H1B	PMAIP1	FBXO22
RBCK1	RBCK1	HSPA4L	ISCU
DTL	DTL	PLK3	PHLDA3
HCFC2	HCFC2	TNFRSF10B	SERPINB5
ABAT	ABAT	ARHGEF3	SERTAD1
FRAS1	FRAS1	UNC5B	TRAF4
HIST1H4H	HIST1H4H	RAD51C	TRIM22
KLF2	KLF2	TNFRSF10D	CES2
EFNB2	EFNB2	PSTPIP2	CMBL
SLC7A11	SLC7A11	RND3	FBXW7
HIST1H2BG	HIST1H2BG	SDC4	HSPA4L
ICAM1	ICAM1	FCHSD2	KITLG
STC2	STC2	TGFA	SLC12A4
TGFB2	TGFB2	EFNB1	ATF3
CD55	CD55	PERP	BBC3
WIPI1	WIPI1	CHST14	CCDC90B
ASNS	ASNS	BBC3	DYRK3
EXO1	EXO1	SERPINE1	EDA2R
EGR1	EGR1	RRM2B	EPHA2
ORC1	ORC1	TET2	FAM13C
CBS	CBS	ITGA3	FAM198B
CCL2	CCL2	ENC1	FAM212B
TREML2	TREML2	CSF1	FDXR
CLSPN	CLSPN	SULF2	LIF
HELLS	HELLS	PRKAB1	NADSYN1
SCARA3	SCARA3	ALDH1A3	NTPCR
HIST1H2AB	HIST1H2AB	MKNK2	ORAI3
RELB	RELB	TP53	PRKAB1
GADD45A	GADD45A	SERTAD1	PTP4A1
ATAD5	ATAD5	EML2	SESN2
TMC7	TMC7	LPXN	SLC30A1
E2F7	E2F7	SNX2	SPATA18
UHRF1	UHRF1	ZMAT3	TGFA
GINS2	GINS2	FBXW7	TLR3
ERRFI1	ERRFI1	RNF144B	TM7SF3
HIST1H4L	HIST1H4L	ADCK3	TMEM68
HIST2H2BE	HIST2H2BE	SLC4A11	WDR63
CHAC1	CHAC1	LAPTM5	ZNF561
TMEM14A	TMEM14A	PGPEP1	ZNF79
FBXO5	FBXO5	PTPRE	ASCC3
GPRC5B	GPRC5B	STAT3	ACER2
TNFAIP3	TNFAIP3	HES1	ANXA4
BIRC3	BIRC3	TMEM63B	APOBEC3C
NR4A1	NR4A1	FUCA1	ASTN2
TCP11L2	TCP11L2	PLLP	CD82
APOL6	APOL6	MCC	CDIP1
ARHGAP31	ARHGAP31	CYFIP2	CPE
ARHGEF4	ARHGEF4	ANXA4	CSF1
SMOX	SMOX	BLOC1S2	DCP1B
DSCC1	DSCC1	ORAI3	ENC1
RP11-265D17.2	RP11-265D17.2	EPHA2	FOSL1
LAMC2	LAMC2	NUPR1	FUCA1
PRSS22	PRSS22	SLC12A4	IER5
STOX1	STOX1	GBE1	PADI4
MMS22L	MMS22L	PPM1D	PANK1
SAA2	SAA2	ZNF385A	PGPEP1
NFKBIA	NFKBIA	ABHD4	PLCL2
CENPE	CENPE	REV3L	PMAIP1
CITED4	CITED4	TP53I3	PRDM1
LCP1	LCP1	PLEKHF1	RAP2B
BCL3	BCL3	DRAM1	RRAD
TP73	TP73	STK17A	ZNF219
SPC24	SPC24	ICOSLG	ZNF337
IFRD1	IFRD1	FAM98C	ACTA2
HIST1H2BM	HIST1H2BM	TRIM32	EDN2
FAM111A	FAM111A	GPC1	ALOX5
RAB39B	RAB39B	PPFIBP1	ARHGEF3
HIST1H4D	HIST1H4D		CERS5
SESN3	SESN3		DDR1
BCL2L15	BCL2L15		DHRS3
GOLGA7B	GOLGA7B		DUSP14
SLC46A3	SLC46A3		E2F7
SPIN4	SPIN4		EPS8L2
RRM2	RRM2		FAM210B
TMEM19	TMEM19		GLS2
TMEM47	TMEM47		GPX1
TCF19	TCF19		GRHL3
CTSS	CTSS		HHAT
ETS1	ETS1		IGDCC4
ASNSP1	ASNSP1		IKBIP
INSIG1	INSIG1		LAPTM5
HIST2H2BA	HIST2H2BA		MAST4
FGF9	FGF9		MICALL1
WDR76	WDR76		NOTCH1
C7orf63	C7orf63		RABGGTA
KAT2B	KAT2B		RNF19B
NCAPG	NCAPG		SAC3D1
SPAG5	SPAG5		SYTL1
MCM5	MCM5		TNFRSF10A
FAM84B	FAM84B		TNFRSF10D
SKA3	SKA3		TSPAN11
KDM6B	KDM6B		VWCE
1	1		DDIT4
MARS	MARS		RAD51C
ASPM	ASPM		SERPINE1
KLF11	KLF11		TNFAIP8
TNIP1	TNIP1		TSKU
WARS	WARS		PCNA
SGTB	SGTB		ACYP2
SLC9A3	SLC9A3		APAF1
PORCN	PORCN		APOBEC3H
BRIP1	BRIP1		BCL2L1
SYNE3	SYNE3		BCL6
RAD51AP1	RAD51AP1		BLCAP
DTX4	DTX4		C17orf82
ITGB8	ITGB8		COL7A1
ASF1B	ASF1B		CPEB4
MICAL2	MICAL2		CSNK1G1
PYGB	PYGB		DGKA
HIST2H2AC	HIST2H2AC		FAM49A
CDC7	CDC7		FAM84B
MCM6	MCM6		GNAI1
SGOL2	SGOL2		INPP1
IRF2BP2	IRF2BP2		ITGA3
KANK2	KANK2		KRT15
NUSAP1	NUSAP1		LCE1E
AC008440.5	AC008440.5		LIMK2
SHCBP1	SHCBP1		LRP1
LONRF1	LONRF1		MCC
NFKB2	NFKB2		NUPR1
HIST2H2AB	HIST2H2AB		PARD6G
DUSP4	DUSP4		PHPT1
SLC22A15	SLC22A15		PIDD1
RP11-531A24.5	RP11-531A24.5		PML
KDELC2	KDELC2		PTPRE
LEMD1	LEMD1		PVRL4
CASC5	CASC5		RETSAT
TNC	TNC		REV3L
PDGFB	PDGFB		RNASE7
LRRC8A	LRRC8A		SFN
APAF1	APAF1		TNFRSF10C
KIF11	KIF11		TRIML2
C18orf54	C18orf54		VCAN
ZNF451	ZNF451		ADCK3
CENPI	CENPI		AK3
GJB3	GJB3		ALDH1A3
TIMP3	TIMP3		BBS2
MCM3	MCM3		BTG1
ATAD2	ATAD2		CEL
ZNF704	ZNF704		CLCA2
ALOX5AP	ALOX5AP		CLDN1
TOP2A	TOP2A		1
HMMR	HMMR		CROT
DNTTIP1	DNTTIP1		CYP4F3
PMP22	PMP22		DAPK1
PLAUR	PLAUR		EPN3
PADI1	PADI1		FBXO32
GMNN	GMNN		FHL2
RP11-110I1.12	RP11-110I1.12		HES2
TMEM194A	TMEM194A		KCNN4
CARS	CARS		KLHDC7A
LRRN4	LRRN4		LMNA
RGS16	RGS16		2
XBP1	XBP1		MR1
RPS6KA5	RPS6KA5		MYO6
PPP1R18	PPP1R18		NEFL
CEBPG	CEBPG		NKAIN4
ZC3HAV1	ZC3HAV1		PCLO
ZNF469	ZNF469		PDE4C
MIR4482	MIR4482		PGAP1
EIF4EBP1	EIF4EBP1		PLCXD2
FAM63A	FAM63A		PLEKHF1
DDB2	DDB2		PLTP
MYC	MYC		PLXNB1
MYBL1	MYBL1		PLXNB2
ADAM22	ADAM22		PRKAB2
IL2RG	IL2RG		PRKX
LOC101930489	LOC101930489		PRODH
SERPINB5	SERPINB5		PTPRU
CDH1	CDH1		RGMA
LGR6	LGR6		RGS16
DLGAP5	DLGAP5		RND3
PCNA	PCNA		RNF144B
RRM1	RRM1		S100A2
SPRY2	SPRY2		SCN2A
UNG	UNG		SCN4B
PSAT1	PSAT1		SCRIB
CSRNP1	CSRNP1		SEMA3B
LMNB1	LMNB1		SLC25A45
MYOF	MYOF		SLC44A5
KIF20B	KIF20B		SLC4A11
TYMS	TYMS		SLC9A1
GALNT12	GALNT12		STAT3
NEK2	NEK2		STK17A
BIRC2	BIRC2		STX6
TNFRSF21	TNFRSF21		TP73
RP11-146D12.2	RP11-146D12.2		TRIM32
CROT	CROT		TRIM38
KLHDC7B	KLHDC7B		TRIM5
THBS1	THBS1		TYMSOS
NCAPH	NCAPH		AKAP9
PDE2A	PDE2A		CCDC51
NCAPD2	NCAPD2		CDH8
SMC2	SMC2		DUSP11
FEN1	FEN1		GCC2
TMX4	TMX4		METTL8
ARHGEF2	ARHGEF2		PPP1R3C
MIR21	MIR21		STEAP3
SP5	SP5		ABHD4
SLC16A10	SLC16A10		ABTB2
PPARG	PPARG		ADGRG1
WWC1	WWC1		AIFM2
SP4	SP4		AMOTL1
GFPT1	GFPT1		AMZ2
GTF2IRD1	GTF2IRD1		ARC
SLIT1	SLIT1		ARVCF
TUBE1	TUBE1		BHLHE40
SLC27A2	SLC27A2		BMP7
PDLIM4	PDLIM4		BORCS7
MGST2	MGST2		BTBD10
MAGI3	MAGI3		BTG3
UBR7	UBR7		C17orf89
PPARD	PPARD		CAPN2
KIF21B	KIF21B		CASP6
KRT16P4	KRT16P4		CATSPERG
C21orf88	C21orf88		CAV1
KIF24	KIF24		CCNK
EOGT	EOGT		CFLAR
KRTAP5-2	KRTAP5-2		CGB7
KRT80	KRT80		CHST14
CEBPB	CEBPB		COBLL1
CLCN6	CLCN6		CPEB2
FAM114A1	FAM114A1		CPSF4
CXCL14	CXCL14		DNAJB2
TK1	TK1		DOCK8
SMIM10	SMIM10		DUSP5
TMEM231	TMEM231		DUSP7
SGOL1	SGOL1		EBI3
GINS1	GINS1		EFNB1
ANLN	ANLN		EI24
HIST1H3G	HIST1H3G		EML2
PCDH1	PCDH1		ENPP2
CPEB4	CPEB4		ETV7
CHRNA5	CHRNA5		FAM196A
CENPN	CENPN		FAM98C
GPT2	GPT2		FCHO2
ZC3H4	ZC3H4		FCHSD2
ARHGAP32	ARHGAP32		FLRT2
MTHFD2	MTHFD2		GBE1
RP11-431J24.2	RP11-431J24.2		GPC1
E2F2	E2F2		HES1
MUC1	MUC1		HRAS
FMNL3	FMNL3		HSD17B3
ZWINT	ZWINT		ICOSLG
TMEM43	TMEM43		IGFBP7
MEPCE	MEPCE		IL1B
MYEOV	MYEOV		ISYNA1
LRP2	LRP2		JAG1
TMEM139	TMEM139		KRT8
PHTF1	PHTF1		KSR1
ARHGAP11A	ARHGAP11A		LACC1
ERCC6L	ERCC6L		LPXN
CDH13	CDH13		LRPAP1
NAGS	NAGS		MFAP3L
RBL1	RBL1		MKNK2
MTHFD1L	MTHFD1L		MON2
FAM83D	FAM83D		MRPL49
DKC1	DKC1		MYBPHL
ESCO2	ESCO2		MYLK
POLA2	POLA2		MYOF
ALG6	ALG6		NFKBIA
KLF9	KLF9		NHLH2
KIF1A	KIF1A		NLRP1
SEC24D	SEC24D		NYNRIN
UHRF1BP1	UHRF1BP1		P3H2
GTSE1	GTSE1		PANK2
ZYX	ZYX		PAQR7
TTK	TTK		PCBP4
MRVI1	MRVI1		PERP
SASS6	SASS6		PLLP
H2AFX	H2AFX		POU3F1
MYH7B	MYH7B		PPFIBP1
FOSL1	FOSL1		PPM1J
POLH	POLH		PPP4R3A
ALS2CL	ALS2CL		PTAFR
KIF18A	KIF18A		RALGDS
MIR222	MIR222		RBM38
CCBL1	CCBL1		RGL1
YARS	YARS		RGS20
MCM4	MCM4		RHOC
RIPK4	RIPK4		RPS19
HIST1H2BL	HIST1H2BL		SARS
LRRC26	LRRC26		SCIN
NOD2	NOD2		SCN3B
TICRR	TICRR		SDC4
CTR9	CTR9		SDPR
PHIP	PHIP		SMAD3
HSPA1A	HSPA1A		SNX2
PIWIL4	PIWIL4		SOCS4
NFKBIE	NFKBIE		TAB3
THSD4	THSD4		TCAIM
CCNA2	CCNA2		TEP1
ALG10	ALG10		TET2
RFC5	RFC5		TEX9
HIST2H4B	HIST2H4B		TMEM63B
LAD1	LAD1		TMEM8B
LINC00341	LINC00341		TP53
KRT13	KRT13		TP53I11
HSPA1B	HSPA1B		TRAK1
C6orf48	C6orf48		TRIP6
LIF	LIF		TSGA10
CYR61	CYR61		UNC5B
SLC7A8	SLC7A8		UQCC1
ASB4	ASB4		VDR
MBNL2	MBNL2		YPEL3
NMNAT2	NMNAT2		ZNF195
CYP2U1	CYP2U1		ZNF385A
ERI2	ERI2		ZNF488
PPP1R15A	PPP1R15A
TRPV4	TRPV4
KRT17	KRT17
MCM2	MCM2
HIST1H2AE	HIST1H2AE
RP11-218F4.1	RP11-218F4.1
LOC100268168	LOC100268168
CRMP1	CRMP1
BLM	BLM
CERK	CERK
TRABD2B	TRABD2B
FZD3	FZD3
ARRDC3	ARRDC3
MYBL2	MYBL2
ABTB2	ABTB2
PHLDA3	PHLDA3
SLC1A4	SLC1A4
SH3KBP1	SH3KBP1
NUF2	NUF2
FOXRED2	FOXRED2
ZNF367	ZNF367
CCDC34	CCDC34
FAM49A	FAM49A
ST6GALNAC2	ST6GALNAC2
LOC100506548	LOC100506548
RNFT2	RNFT2
AKAP12	AKAP12
MNS1	MNS1
C1orf233	C1orf233
FZD7	FZD7
GATSL2	GATSL2
LACTB	LACTB
SHB	SHB
FANCB	FANCB
OAS3	OAS3
CBLB	CBLB
CENPL	CENPL
LIPG	LIPG
KIAA0226L	KIAA0226L
TENM2	TENM2
TM7SF3	TM7SF3
GNE	GNE
CA5B	CA5B
CTA-384D8.31	CTA-384D8.31
CDKN2C	CDKN2C
LONP1	LONP1
ITGA5	ITGA5
PKI55	PKI55
TBC1D17	TBC1D17
CPEB2	CPEB2
DNA2	DNA2
ATF3	ATF3
MLLT4	MLLT4
LOC283588	LOC283588
CDCA8	CDCA8
SENP7	SENP7
TMEM159	TMEM159
BHLHE40	BHLHE40
RAPH1	RAPH1
3-Sep	3-Sep
CLIC4	CLIC4
ZSWIM5	ZSWIM5
BUB1	BUB1
LOC101928262	LOC101928262
RDH10	RDH10
C1orf112	C1orf112
ABR	ABR
ULBP1	ULBP1
NOG	NOG
CASP2	CASP2
SNX9	SNX9
DDR1	DDR1
IGFBP3	IGFBP3
IGFL1	IGFL1
PTK6	PTK6
RP11-385D13.1	RP11-385D13.1
NFIL3	NFIL3
LINC00511	LINC00511
CYTH3	CYTH3
DEPDC1	DEPDC1
SLC12A7	SLC12A7
PPP1R10	PPP1R10
CAMK2N2	CAMK2N2
DCUN1D3	DCUN1D3
HIVEP2	HIVEP2
RTEL1-TNFRSF6B	RTEL1-TNFRSF6B
FANCL	FANCL
LINC00857	LINC00857
SARS	SARS
PPP4R4	PPP4R4
POLQ	POLQ
FLNB	FLNB
MELK	MELK
MYADM	MYADM
SKA2	SKA2
HIST1H3A	HIST1H3A
KNTC1	KNTC1
ABCD1	ABCD1
KCNN4	KCNN4
AVPI1	AVPI1
SAT1	SAT1
PYCR1	PYCR1
BIRC5	BIRC5
KIAA0101	KIAA0101
NEIL3	NEIL3
MAD2L1	MAD2L1
P4HA2	P4HA2
ABHD6	ABHD6
FHL2	FHL2
SLC35A5	SLC35A5
RMI2	RMI2
MGME1	MGME1
NCOA5	NCOA5
PLAU	PLAU
MKI67	MKI67
LINC01124	LINC01124
PBK	PBK
DBP	DBP
HIST1H1C	HIST1H1C
JMY	JMY
MSMO1	MSMO1
DONSON	DONSON
SLC6A20	SLC6A20
SPC25	SPC25
MCM10	MCM10
NCOA7	NCOA7
LRRC34	LRRC34
KCNJ10	KCNJ10
ERAP2	ERAP2
CHAF1A	CHAF1A
AARS	AARS
GOLGA5	GOLGA5
MPHOSPH9	MPHOSPH9
CENPP	CENPP
C3	C3
LOC101928173	LOC101928173
AKNA	AKNA
DIDO1	DIDO1
SKA1	SKA1
SUV39H1	SUV39H1
STIL	STIL
FBXL16	FBXL16
CALB2	CALB2
APOBEC3G	APOBEC3G
MANSC1	MANSC1
MSH2	MSH2
PAPL	PAPL
SLC16A6	SLC16A6
DGCR8	DGCR8
TM4SF1	TM4SF1
CDK1	CDK1
PARP8	PARP8
TRIM47	TRIM47
METTL7B	METTL7B
MRPS31P5	MRPS31P5
SHMT2	SHMT2
PRDM16	PRDM16
DCLRE1B	DCLRE1B
KIAA1524	KIAA1524
MASTL	MASTL
NRM	NRM
HERPUD1	HERPUD1
KIFC1	KIFC1
TRANK1	TRANK1
TMPO	TMPO
CENPO	CENPO
PABPC1L	PABPC1L
TLE1	TLE1
PMAIP1	PMAIP1
MIR23B	MIR23B
IL22RA1	IL22RA1
AC008440.10	AC008440.10
GABPA	GABPA
SBNO2	SBNO2
N4BP3	N4BP3
CKAP2L	CKAP2L
ZFAND2A	ZFAND2A
KLF3	KLF3
ZNF554	ZNF554
IGSF9B	IGSF9B
B3GALTL	B3GALTL
TAGLN	TAGLN
PLEKHA4	PLEKHA4
UGCG	UGCG
ABLIM2	ABLIM2
FAM120C	FAM120C
GPR56	GPR56
CYP51A1	CYP51A1
FAM217B	FAM217B
CEACAM1	CEACAM1
AHNAK2	AHNAK2
PLEC	PLEC
DHX9	DHX9
PRIM1	PRIM1
PELI1	PELI1
HIST2H3PS2	HIST2H3PS2
SRGAP2	SRGAP2
DDIT3	DDIT3
CBX4	CBX4
HSD17B2	HSD17B2
WNT5A	WNT5A
SNORA36A	SNORA36A
PKNOX1	PKNOX1
LHFPL2	LHFPL2
GINS4	GINS4
CCND2	CCND2
TAF9B	TAF9B
HIST1H2BD	HIST1H2BD
ATP6V0A1	ATP6V0A1
PIAS1	PIAS1
MEX3C	MEX3C
DNAJB1	DNAJB1
HIST1H4I	HIST1H4I
RNA5SP60	RNA5SP60
FGF20	FGF20
LONRF3	LONRF3
TMEM97	TMEM97
PVRL2	PVRL2
ALAS1	ALAS1
SNHG8	SNHG8
PRSS33	PRSS33
GAS2L3	GAS2L3
CDC42EP1	CDC42EP1
KIAA1715	KIAA1715
ARFRP1	ARFRP1
HIST1H3F	HIST1H3F
SLC43A1	SLC43A1
CCNB2	CCNB2
CKAP2	CKAP2
HSPA4L	HSPA4L
WDHD1	WDHD1
GAL3ST2	GAL3ST2
LRRCC1	LRRCC1
HTRA1	HTRA1
TMEM80	TMEM80
ADRBK2	ADRBK2
C6orf132	C6orf132
RP11-134G8.8	RP11-134G8.8
BMP2K	BMP2K
MINA	MINA
PLK3	PLK3
ARID5B	ARID5B
TMPO-AS1	TMPO-AS1
MCM8	MCM8
KCTD13	KCTD13
CCSER2	CCSER2
KLF4	KLF4
DTWD2	DTWD2
BRCA2	BRCA2
HSD17B11	HSD17B11
TNKS1BP1	TNKS1BP1
PITHD1	PITHD1
PIK3AP1	PIK3AP1
MAPRE2	MAPRE2
SVIL	SVIL
VASP	VASP
POLA1	POLA1
RAPGEF3	RAPGEF3
RFC3	RFC3
HERC6	HERC6
CDC20	CDC20
WBP2	WBP2
CEP78	CEP78
SLC37A2	SLC37A2
C9orf91	C9orf91
SRSF2	SRSF2
PHTF2	PHTF2
TMEM158	TMEM158
OIP5	OIP5
ATP6V1A	ATP6V1A
TNFRSF10B	TNFRSF10B
PCK2	PCK2
HIST1H2AC	HIST1H2AC
TAF5	TAF5
BTBD11	BTBD11
SFPQ	SFPQ
EMP1	EMP1
SMC1A	SMC1A
NCAPD3	NCAPD3
NDC80	NDC80
TRPM4	TRPM4
HIST2H2BC	HIST2H2BC
CENPF	CENPF
TNF	TNF
TBC1D8	TBC1D8
PLK1	PLK1
PCNA-AS1	PCNA-AS1
KIAA1161	KIAA1161
CDCA2	CDCA2
SGCB	SGCB
ARHGAP29	ARHGAP29
EIF4EBP2	EIF4EBP2
TPRA1	TPRA1
SPNS2	SPNS2
AC019349.5	AC019349.5
GJB4	GJB4
ZNF618	ZNF618
MIR614	MIR614
RP11-283C24.1	RP11-283C24.1
SH3BP4	SH3BP4
MBNL3	MBNL3
DPY19L1	DPY19L1
LINC00662	LINC00662
CHEK1	CHEK1
LAMB3	LAMB3
MMP14	MMP14
HMGB2	HMGB2
ZWILCH	ZWILCH
MED11	MED11
RAB43	RAB43
TRIP10	TRIP10
IRF6	IRF6
RPS6KL1	RPS6KL1
CENPW	CENPW
TPX2	TPX2
CHRNB1	CHRNB1
LYRM1	LYRM1
CHAF1B	CHAF1B
CDHR3	CDHR3
FAM20B	FAM20B
NDRG1	NDRG1
ALDH9A1	ALDH9A1
TMEM150C	TMEM150C
CDT1	CDT1
ARHGEF3	ARHGEF3
SIRPA	SIRPA
LINC00963	LINC00963
CX3CL1	CX3CL1
TUSC8	TUSC8
UNC5B	UNC5B
CEP97	CEP97
TSPAN2	TSPAN2
KDELC1	KDELC1
CCNB1IP1	CCNB1IP1
LOC100130876	LOC100130876
ZC3H12A	ZC3H12A
HIST1H2BK	HIST1H2BK
ATF7IP	ATF7IP
HIST3H2BB	HIST3H2BB
HIST1H2AK	HIST1H2AK
DIAPH3	DIAPH3
ATP11C	ATP11C
CRABP2	CRABP2
PPP1R13L	PPP1R13L
FAM214B	FAM214B
ARRDC4	ARRDC4
SLC9A2	SLC9A2
RAD51C	RAD51C
LOC374443	LOC374443
MEIS2	MEIS2
LIG1	LIG1
LOXL2	LOXL2
INTS3	INTS3
FRYL	FRYL
PRKACA	PRKACA
PBRM1	PBRM1
DCDC2	DCDC2
CTA-398F10.2	CTA-398F10.2
TOPBP1	TOPBP1
SAMHD1	SAMHD1
MID1IP1	MID1IP1
H2AFV	H2AFV
SCML1	SCML1
T	T
ATP1B1	ATP1B1
ARID1A	ARID1A
CCDC174	CCDC174
CDCA3	CDCA3
ICMT	ICMT
NKD1	NKD1
MIR518B	MIR518B
TGFB1I1	TGFB1I1
SLC25A29	SLC25A29
ARL6IP1	ARL6IP1
LAMC1	LAMC1
PKD1P5	PKD1P5
PAQR5	PAQR5
CCL24	CCL24
LBR	LBR
CDCP1	CDCP1
LINC01134	LINC01134
FLJ37453	FLJ37453
ZNF783	ZNF783
MXD1	MXD1
LOC90246	LOC90246
RP11-798M19.3	RP11-798M19.3
TCTN2	TCTN2
PRICKLE3	PRICKLE3
RRP36	RRP36
AGL	AGL
KIF4A	KIF4A
CDKN3	CDKN3
HAUS1	HAUS1
AF196970.3	AF196970.3
DYNLL1	DYNLL1
FUBP1	FUBP1
TNFRSF10D	TNFRSF10D
GDF11	GDF11
PSMC3IP	PSMC3IP
CD70	CD70
PDK3	PDK3
SNTB1	SNTB1
DHX29	DHX29
GJB2	GJB2
USP13	USP13
PM20D2	PM20D2
PHLPP1	PHLPP1
C16orf52	C16orf52
DOLPP1	DOLPP1
ECE1	ECE1
C1orf116	C1orf116
PLXNA3	PLXNA3
SCAND2P	SCAND2P
TTC39B	TTC39B
E2F1	E2F1
TTLL11	TTLL11
TMEM109	TMEM109
LANCL2	LANCL2
MANEA	MANEA
SCD	SCD
U2AF2	U2AF2
ADM2	ADM2
CTD-2538C1.2	CTD-2538C1.2
HIST1H2AI	HIST1H2AI
CASC10	CASC10
AFAP1L2	AFAP1L2
ANKRD11	ANKRD11
LOC339192	LOC339192
EREG	EREG
LOC100132167	LOC100132167
COG5	COG5
HGSNAT	HGSNAT
SLC7A1	SLC7A1
BMP6	BMP6
GINS3	GINS3
DNAJC22	DNAJC22
ETFDH	ETFDH
INPP5F	INPP5F
UBE2H	UBE2H
ITGB4	ITGB4
PSTPIP2	PSTPIP2
SH3PXD2A	SH3PXD2A
SLC44A1	SLC44A1
CENPQ	CENPQ
PARP6	PARP6
STMN1	STMN1
LOC102723825	LOC102723825
NARS	NARS
RAD54L	RAD54L
SLC44A2	SLC44A2
MCM7	MCM7
TIFA	TIFA
INSIG2	INSIG2
PIGN	PIGN
RP11-290L1.3	RP11-290L1.3
ETV1	ETV1
GSTM4	GSTM4
CEP152	CEP152
ASS1	ASS1
NXF1	NXF1
EFR3B	EFR3B
PAX8	PAX8
NDC1	NDC1
LAMA5	LAMA5
PFDN2	PFDN2
ZMYND8	ZMYND8
SHMT1	SHMT1
TMTC2	TMTC2
AP1G1	AP1G1
TMEM150A	TMEM150A
RNF41	RNF41
MYO10	MYO10
ILDR2	ILDR2
CDCA7	CDCA7
NAGA	NAGA
LOC101929374	LOC101929374
KCTD3	KCTD3
NRGN	NRGN
IARS	IARS
ZFAS1	ZFAS1
RAD51	RAD51
LANCL1	LANCL1
ZNF263	ZNF263
ICAM5	ICAM5
ZNF330	ZNF330
CENPH	CENPH
RND3	RND3
TMEM107	TMEM107
ROBO4	ROBO4
NUP85	NUP85
LOC284023	LOC284023
RP13-463N16.6	RP13-463N16.6
PRDX3	PRDX3
TBC1D24	TBC1D24
RFC2	RFC2
ALDH3A2	ALDH3A2
IGF2BP2	IGF2BP2
MIR196B	MIR196B
MIR503	MIR503
ZGRF1	ZGRF1
DNAH17	DNAH17
SRSF1	SRSF1
NDRG4	NDRG4
LRRK1	LRRK1
R3HDM2	R3HDM2
GARS	GARS
XRCC6BP1	XRCC6BP1
NMU	NMU
IRF1	IRF1
ELF4	ELF4
HIST2H3A	HIST2H3A
SDC4	SDC4
NOS2	NOS2
FAM122B	FAM122B
NPTX2	NPTX2
MBOAT1	MBOAT1
BCAR3	BCAR3
EHF	EHF
PHGDH	PHGDH
XPOT	XPOT
AC092171.4	AC092171.4
FAM13B	FAM13B
BPGM	BPGM
DACH1	DACH1
FCHSD2	FCHSD2
CHST15	CHST15
ATF4	ATF4
PER1	PER1
FBXO3	FBXO3
MVD	MVD
ARG2	ARG2
MIR4697HG	MIR4697HG
VASN	VASN
AP5Z1	AP5Z1
WDR7	WDR7
PRDX5	PRDX5
CCDC18	CCDC18
QPCTL	QPCTL
ABCC3	ABCC3
UST	UST
SVILP1	SVILP1
RILPL1	RILPL1
MND1	MND1
LINC01186	LINC01186
KPNA2	KPNA2
DTYMK	DTYMK
EPRS	EPRS
SQRDL	SQRDL
CCNE1	CCNE1
GPATCH11	GPATCH11
SNORA4	SNORA4
ELF3	ELF3
GPR155	GPR155
TGFA	TGFA
MYLIP	MYLIP
SAFB2	SAFB2
C17orf100	C17orf100
EFNB1	EFNB1
EPB41L4A-AS1	EPB41L4A-AS1
HELZ	HELZ
PDP2	PDP2
PPIA	PPIA
DDX46	DDX46
MAD1L1	MAD1L1
PDCL3P4	PDCL3P4
ESPL1	ESPL1
HMGCS1	HMGCS1
ZFP36L1	ZFP36L1
JUP	JUP
ZNF770	ZNF770
USP6NL	USP6NL
KIAA1841	KIAA1841
RPS6KA2	RPS6KA2
RASGRP3	RASGRP3
HNRNPM	HNRNPM
GRPEL2	GRPEL2
TACSTD2	TACSTD2
POC1B	POC1B
WSB2	WSB2
EPB41L1	EPB41L1
CENPK	CENPK
UBE2T	UBE2T
RASSF5	RASSF5
USP36	USP36
PERP	PERP
BMPR1A	BMPR1A
CDC25C	CDC25C
LZTS1	LZTS1
SLC4A7	SLC4A7
FAM115A	FAM115A
ARL13B	ARL13B
TAX1BP1	TAX1BP1
CFL2	CFL2
BRD4	BRD4
RP11-1029J19.4	RP11-1029J19.4
HIST1H2BN	HIST1H2BN
UNC5A	UNC5A
C2CD5	C2CD5
ALDH5A1	ALDH5A1
ITPKC	ITPKC
BSN	BSN
INTS7	INTS7
LOC100131372	LOC100131372
AC017002.2	AC017002.2
KEAP1	KEAP1
RNF26	RNF26
AP3B2	AP3B2
FBXL17	FBXL17
SEMA6B	SEMA6B
DIXDC1	DIXDC1
RP11-397D12.4	RP11-397D12.4
CITED2	CITED2
PDE3B	PDE3B
CHST14	CHST14
PLK4	PLK4
BAMBI	BAMBI
ZNF460	ZNF460
CDC25B	CDC25B
TTLL7	TTLL7
YPEL2	YPEL2
ASCL2	ASCL2
LHFP	LHFP
TOMM40L	TOMM40L
SSH2	SSH2
LPP-AS2	LPP-AS2
ZFAND1	ZFAND1
ASB8	ASB8
OSTF1	OSTF1
TBC1D10A	TBC1D10A
NCAPG2	NCAPG2
PLEKHM1	PLEKHM1
SLC20A1	SLC20A1
OR7E14P	OR7E14P
SELPLG	SELPLG
OXTR	OXTR
SNHG15	SNHG15
ATOX1	ATOX1
C5orf28	C5orf28
CDC25A	CDC25A
PTPLAD1	PTPLAD1
TMPRSS3	TMPRSS3
NTRK2	NTRK2
ENTPD6	ENTPD6
SNHG17	SNHG17
BBC3	BBC3
NAMPT	NAMPT
SLC29A2	SLC29A2
LOC652276	LOC652276
SEMA4F	SEMA4F
GRK6	GRK6
LOC100130256	LOC100130256
SERPINE1	SERPINE1
LNPEP	LNPEP
MOCOS	MOCOS
GPD2	GPD2
PRIM2	PRIM2
PRSS23	PRSS23
LOC102724814	LOC102724814
BARD1	BARD1
GRAMD1A	GRAMD1A
DBN1	DBN1
MIR645	MIR645
VPS13B	VPS13B
CDK5	CDK5
SLC16A9	SLC16A9
LTBR	LTBR
ACBD7	ACBD7
LOC728323	LOC728323
TRIM25	TRIM25
C2orf54	C2orf54
DUSP8	DUSP8
JUN	JUN
DSTNP2	DSTNP2
ZBTB21	ZBTB21
MCTP1	MCTP1
FAM98B	FAM98B
SNORD83B	SNORD83B
ZPR1	ZPR1
DDX6	DDX6
CENPU	CENPU
WNT5A-AS1	WNT5A-AS1
PI4K2B	PI4K2B
COX15	COX15
GXYLT2	GXYLT2
IBTK	IBTK
HUWE1	HUWE1
KRCC1	KRCC1
ZSWIM8	ZSWIM8
KATNAL1	KATNAL1
FGF3	FGF3
NAT9	NAT9
HNRNPA1L2	HNRNPA1L2
TSC22D3	TSC22D3
ZNF77	ZNF77
MYO5B	MYO5B
KIAA0754	KIAA0754
SLCO4A1	SLCO4A1
MGAT4B	MGAT4B
ZNF598	ZNF598
SRD5A3	SRD5A3
CAPRIN2	CAPRIN2
LMO7	LMO7
COQ10A	COQ10A
HS3ST3A1	HS3ST3A1
SMC5-AS1	SMC5-AS1
SOWAHC	SOWAHC
FANCG	FANCG
DCLK1	DCLK1
NT5DC2	NT5DC2
TMEM198	TMEM198
ZCCHC7	ZCCHC7
LOC645553	LOC645553
EPSTI1	EPSTI1
AOC1	AOC1
RHOF	RHOF
DPY19L4	DPY19L4
CLIP4	CLIP4
AURKA	AURKA
CDH11	CDH11
HEXIM1	HEXIM1
HOMEZ	HOMEZ
PKD1P1	PKD1P1
3	3
PAX8-AS1	PAX8-AS1
KLF5	KLF5
SMAD6	SMAD6
RPA3	RPA3
DARS2	DARS2
CDC6	CDC6
FAM172A	FAM172A
MUT	MUT
MPC2	MPC2
ZNF611	ZNF611
CADM4	CADM4
CEP162	CEP162
CDK2	CDK2
GTPBP2	GTPBP2
EXPH5	EXPH5
TGIF1	TGIF1
SCFD2	SCFD2
PDS5B	PDS5B
POFUT2	POFUT2
RRM2B	RRM2B
ERVK13-1	ERVK13-1
YIPF2	YIPF2
ACOT1	ACOT1
PALM2-AKAP2	PALM2-AKAP2
FOXK1	FOXK1
COPG1	COPG1
PLD6	PLD6
SLC17A5	SLC17A5
CLEC2D	CLEC2D
SPPL2A	SPPL2A
POLR2A	POLR2A
RP4-791M13.3	RP4-791M13.3
C14orf132	C14orf132
SAMD4A	SAMD4A
PVR	PVR
ATPAF1	ATPAF1
SNRNP25	SNRNP25
LAPTM4B	LAPTM4B
AC079354.5	AC079354.5
TET2	TET2
TFDP1	TFDP1
SZRD1	SZRD1
FUT8	FUT8
RP11-108M9.2	RP11-108M9.2
PPIL1	PPIL1
COX6B2	COX6B2
ANKRD10	ANKRD10
FAM219B	FAM219B
MLLT11	MLLT11
RFWD3	RFWD3
NT5C	NT5C
GOSR2	GOSR2
EGFR	EGFR
ITGA3	ITGA3
WNT6	WNT6
AC012507.4	AC012507.4
SMPD1	SMPD1
FOXM1	FOXM1
RELL2	RELL2
HS1BP3-IT1	HS1BP3-IT1
RABEP2	RABEP2
ARFGAP3	ARFGAP3
CISD2	CISD2
SOX9	SOX9
RTN4IP1	RTN4IP1
MIS18A	MIS18A
UBR3	UBR3
NFIB	NFIB
RSBN1L	RSBN1L
SLC43A3	SLC43A3
PHF19	PHF19
HOOK2	HOOK2
TRBJ2-2	TRBJ2-2
ERGIC2	ERGIC2
NUP133	NUP133
SH3PXD2A-AS1	SH3PXD2A-AS1
SETD5	SETD5
CIT	CIT
TUBBP5	TUBBP5
SESTD1	SESTD1
FANCM	FANCM
BRI3BP	BRI3BP
LITAF	LITAF
H2AFZ	H2AFZ
LOC102724133	LOC102724133
ADM	ADM
UNC13B	UNC13B
ARID2	ARID2
HIST1H3I	HIST1H3I
CXXC5	CXXC5
PXDC1	PXDC1
LOC729218	LOC729218
RHPN1-AS1	RHPN1-AS1
SLC12A6	SLC12A6
SNORA84	SNORA84
CDCA7L	CDCA7L
PXMP4	PXMP4
COG4	COG4
CALR	CALR
ME3	ME3
DCBLD1	DCBLD1
HENMT1	HENMT1
ZNF786	ZNF786
CNPY4	CNPY4
ABHD17B	ABHD17B
ZNF558	ZNF558
PRKCG	PRKCG
PDE12	PDE12
FMN1	FMN1
DLGAP1-AS2	DLGAP1-AS2
ZFPL1	ZFPL1
HJURP	HJURP
CCDC109B	CCDC109B
GPR126	GPR126
PARPBP	PARPBP
MSH3	MSH3
LRIG1	LRIG1
KLHL5	KLHL5
ARL8A	ARL8A
RNU6-1284P	RNU6-1284P
LOC101929530	LOC101929530
TIPIN	TIPIN
ABHD3	ABHD3
FBXO33	FBXO33
MKL2	MKL2
KIF23	KIF23
STAT1	STAT1
TC2N	TC2N
FOXN3-AS1	FOXN3-AS1
FNBP1L	FNBP1L
KDM1B	KDM1B
EPHA4	EPHA4
IFNGR2	IFNGR2
SPAST	SPAST
GEN1	GEN1
NTSR1	NTSR1
SMO	SMO
SRRT	SRRT
KIAA0513	KIAA0513
FAM64A	FAM64A
PHLDA1	PHLDA1
KIF14	KIF14
NOB1	NOB1
RP11-67L3.5	RP11-67L3.5
TRIM71	TRIM71
UBE2E2	UBE2E2
HOXB9	HOXB9
NFAT5	NFAT5
STEAP2	STEAP2
SNORD91A	SNORD91A
RNU6-930P	RNU6-930P
NPC1	NPC1
CEP19	CEP19
ENC1	ENC1
CSF1	CSF1
SLC35A4	SLC35A4
ZMIZ1	ZMIZ1
KIF4B	KIF4B
POLD3	POLD3
TLDC2	TLDC2
NLK	NLK
ZBTB12	ZBTB12
EPS8	EPS8
POLI	POLI
DDX23	DDX23
PTMA	PTMA
ANKRD50	ANKRD50
OPTN	OPTN
DPYSL5	DPYSL5
MOSPD1	MOSPD1
SULF2	SULF2
HIST4H4	HIST4H4
MSH6	MSH6
KRT86	KRT86
SENP2	SENP2
MSX1	MSX1
USP27X	USP27X
NHSL1	NHSL1
PRTFDC1	PRTFDC1
NUP205	NUP205
MTO1	MTO1
CYB5R2	CYB5R2
FANCI	FANCI
IGFL4	IGFL4
ZNF581	ZNF581
HPCAL1	HPCAL1
TRAM2	TRAM2
MRPS28	MRPS28
B4GALNT1	B4GALNT1
ZNF518A	ZNF518A
ALG8	ALG8
GULP1	GULP1
SAFB	SAFB
PRRG1	PRRG1
MICALCL	MICALCL
SPAG1	SPAG1
KIF18B	KIF18B
RNF157	RNF157
OSBPL6	OSBPL6
DDIAS	DDIAS
EDEM1	EDEM1
ISM2	ISM2
HOXB3	HOXB3
CLK3	CLK3
PARP1	PARP1
IL24	IL24
STARD7	STARD7
BCL2L12	BCL2L12
DNMT1	DNMT1
PRKAB1	PRKAB1
FLOT1	FLOT1
IL27RA	IL27RA
IL17RB	IL17RB
P2RX5-TAX1BP3	P2RX5-TAX1BP3
UBTF	UBTF
MID1	MID1
CDC45	CDC45
SGMS2	SGMS2
TMC6	TMC6
HSPA13	HSPA13
BRCA1	BRCA1
LMBRD2	LMBRD2
FKBP1B	FKBP1B
LEMD3	LEMD3
MIER1	MIER1
MIF4GD	MIF4GD
CEP76	CEP76
CCP110	CCP110
ELP6	ELP6
ACSS2	ACSS2
ACACB	ACACB
MGLL	MGLL
HIRIP3	HIRIP3
MED13L	MED13L
CCDC3	CCDC3
MED31	MED31
TRIO	TRIO
RDH11	RDH11
NPAT	NPAT
POLE	POLE
KIF2C	KIF2C
UFM1	UFM1
RP11-253E3.3	RP11-253E3.3
SLC35C1	SLC35C1
CENPA	CENPA
FASTKD1	FASTKD1
ZNF496	ZNF496
MIR4640	MIR4640
LHX2	LHX2
ATG101	ATG101
CCNF	CCNF
MPP5	MPP5
DCK	DCK
CTSC	CTSC
TEKT4P2	TEKT4P2
RP11-374M1.2	RP11-374M1.2
CNTRL	CNTRL
TMEM177	TMEM177
RMI1	RMI1
DPYSL3	DPYSL3
CBR3	CBR3
LOC101927841	LOC101927841
OXR1	OXR1
SARS2	SARS2
TMEM87A	TMEM87A
ALDH1A3	ALDH1A3
NUB1	NUB1
WBP1L	WBP1L
IPP	IPP
RNA5SP406	RNA5SP406
C1GALT1C1	C1GALT1C1
AURKB	AURKB
FANCD2	FANCD2
SOX13	SOX13
HSH2D	HSH2D
FAM72C	FAM72C
AC017074.2	AC017074.2
RBBP4	RBBP4
LCMT1	LCMT1
NCOR2	NCOR2
IFI30	IFI30
ST7	ST7
PFKFB2	PFKFB2
C5orf34	C5orf34
RAP1GAP2	RAP1GAP2
SHH	SHH
UBE4B	UBE4B
SRSF10	SRSF10
RSL24D1	RSL24D1
WFDC2	WFDC2
ANAPC15	ANAPC15
RNF19A	RNF19A
SCARNA7	SCARNA7
METRNL	METRNL
ATF5	ATF5
CST5	CST5
C17orf51	C17orf51
LOC101930385	LOC101930385
CD24	CD24
NUAK1	NUAK1
NES	NES
COL4A2-AS1	COL4A2-AS1
TACC3	TACC3
NDUFB1	NDUFB1
PROSER2	PROSER2
SLC35D2	SLC35D2
RP11-66B24.4	RP11-66B24.4
SYVN1	SYVN1
CCDC186	CCDC186
CCDC57	CCDC57
ACAA2	ACAA2
ATG4A	ATG4A
SLC2A6	SLC2A6
ZNF724P	ZNF724P
MKNK2	MKNK2
RP11-103H7.5	RP11-103H7.5
KIAA1279	KIAA1279
HIST1H2BJ	HIST1H2BJ
CCNB1	CCNB1
ATP7A	ATP7A
SORT1	SORT1
RP6-206I17.1	RP6-206I17.1
SLC6A6	SLC6A6
TP53	TP53
RNU1-18P	RNU1-18P
SMG1	SMG1
RNF187	RNF187
STX1A	STX1A
ANKEF1	ANKEF1
PSMC2	PSMC2
ZBTB44	ZBTB44
PLCG2	PLCG2
HSPA8	HSPA8
TMEM62	TMEM62
TTC17	TTC17
ITPR3	ITPR3
NEBL	NEBL
MT-TC	MT-TC
ZHX3	ZHX3
INTS2	INTS2
PHF7	PHF7
WASH1	WASH1
FAM178A	FAM178A
ZNHIT6	ZNHIT6
ALG2	ALG2
HNRNPH3	HNRNPH3
ICA1	ICA1
DUS4L	DUS4L
L1CAM	L1CAM
IRF2BPL	IRF2BPL
RHOBTB2	RHOBTB2
PIAS2	PIAS2
ASTE1	ASTE1
FGFRL1	FGFRL1
LYST	LYST
SERTAD1	SERTAD1
EIF5A2	EIF5A2
CLIP2	CLIP2
SYNJ1	SYNJ1
CHAMP1	CHAMP1
CASC7	CASC7
ANP32E	ANP32E
TRIT1	TRIT1
UCP2	UCP2
CACNB4	CACNB4
SH3RF2	SH3RF2
RNU6-787P	RNU6-787P
KIF15	KIF15
ANO1-AS1	ANO1-AS1
SH3BP2	SH3BP2
FGF13	FGF13
ZNF697	ZNF697
FOXRED1	FOXRED1
NRIP3	NRIP3
NAGK	NAGK
SH3RF3	SH3RF3
LPCAT3	LPCAT3
GNPTAB	GNPTAB
RP11-338K17.8	RP11-338K17.8
DPEP1	DPEP1
ZNF461	ZNF461
GTF3C6	GTF3C6
NETO2	NETO2
FMNL2	FMNL2
FAM102B	FAM102B
NFE2L1	NFE2L1
P4HA1	P4HA1
NSL1	NSL1
GORAB	GORAB
PPARGC1B	PPARGC1B
CTSV	CTSV
ACADSB	ACADSB
DIRC2	DIRC2
FAM96A	FAM96A
EPHB3	EPHB3
HUNK	HUNK
S1PR2	S1PR2
FANCC	FANCC
MAN1A2	MAN1A2
TAF1D	TAF1D
SMC4	SMC4
RNU6-135P	RNU6-135P
BTBD3	BTBD3
RP11-660L16.2	RP11-660L16.2
SIAH2	SIAH2
SQLE	SQLE
MLKL	MLKL
ARSK	ARSK
SCRN3	SCRN3
PMF1	PMF1
CERS6	CERS6
KCNK6	KCNK6
GNAL	GNAL
MT-TS1	MT-TS1
SMYD2	SMYD2
ZNF100	ZNF100
EML2	EML2
KDM5B	KDM5B
DHCR24	DHCR24
DHRS2	DHRS2
OTUD1	OTUD1
PSPH	PSPH
CDC42BPB	CDC42BPB
MNT	MNT
PMVK	PMVK
BOD1	BOD1
SERPINE2	SERPINE2
LINC00152	LINC00152
TUBGCP5	TUBGCP5
RP11-114H23.1	RP11-114H23.1
RPA1	RPA1
CACYBP	CACYBP
ZNF280C	ZNF280C
LAT	LAT
FAM173B	FAM173B
ELK4	ELK4
LPXN	LPXN
TTYH2	TTYH2
KDM4A	KDM4A
HMCES	HMCES
AASS	AASS
DNAL1	DNAL1
RP11-1100L3.7	RP11-1100L3.7
TBPL1	TBPL1
BACE1	BACE1
WNT7A	WNT7A
SNRPD1	SNRPD1
HEATR5A	HEATR5A
CLPB	CLPB
C6orf211	C6orf211
NUDT15	NUDT15
NFS1	NFS1
CDX2	CDX2
MIR4525	MIR4525
BBS4	BBS4
FTSJ3	FTSJ3
MGC12916	MGC12916
RREB1	RREB1
CEP128	CEP128
CDC42EP2	CDC42EP2
NKX1-1	NKX1-1
C16orf45	C16orf45
MLPH	MLPH
KRIT1	KRIT1
PI3	PI3
NSUN5P1	NSUN5P1
MRPL22	MRPL22
ECI2	ECI2
BCLAF1	BCLAF1
AP000525.9	AP000525.9
TMEM173	TMEM173
KRTAP2-3	KRTAP2-3
SRGAP2C	SRGAP2C
ZNF621	ZNF621
ATPIF1	ATPIF1
LOC100288175	LOC100288175
FAM65A	FAM65A
CNKSR3	CNKSR3
TUBB6	TUBB6
COQ7	COQ7
RP3-395M20.7	RP3-395M20.7
DPP3	DPP3
RP11-304M2.5	RP11-304M2.5
RIMKLA	RIMKLA
TGFBI	TGFBI
ECT2	ECT2
DSN1	DSN1
SPR	SPR
BUB1B	BUB1B
TMPRSS2	TMPRSS2
SLC26A6	SLC26A6
NDUFB3	NDUFB3
LARP1B	LARP1B
CENPM	CENPM
CDK7	CDK7
HIST2H2AA4	HIST2H2AA4
UBE2E3	UBE2E3
STX11	STX11
AXL	AXL
CD8B	CD8B
XRCC2	XRCC2
JADE1	JADE1
CEP192	CEP192
ANKRD27	ANKRD27
HOXB-AS3	HOXB-AS3
TRAF1	TRAF1
SNX2	SNX2
PSD3	PSD3
ARFGAP1	ARFGAP1
MED10	MED10
ACADM	ACADM
MET	MET
FAM8A1	FAM8A1
C15orf39	C15orf39
ELF1	ELF1
SLC24A1	SLC24A1
CCDC88A	CCDC88A
HSPB1P1	HSPB1P1
GMFG	GMFG
SH3RF1	SH3RF1
TGFB1	TGFB1
FOS	FOS
RAD54B	RAD54B
PIGW	PIGW
CRTC3	CRTC3
BATF	BATF
RERE	RERE
ZMAT3	ZMAT3
SLC29A1	SLC29A1
CYP20A1	CYP20A1
CYB5RL	CYB5RL
DENND6A	DENND6A
LOC400706	LOC400706
ZCCHC14	ZCCHC14
CEP55	CEP55
DCAF10	DCAF10
ZNF570	ZNF570
LIPT2	LIPT2
PPIL3	PPIL3
VWDE	VWDE
TENC1	TENC1
PDGFA	PDGFA
DOCK5	DOCK5
ZFP1	ZFP1
HCG18	HCG18
VSNL1	VSNL1
GPCPD1	GPCPD1
ZKSCAN1	ZKSCAN1
RFC4	RFC4
IPO9	IPO9
KCTD15	KCTD15
TRMT2B	TRMT2B
RIPK2	RIPK2
NBPF11	NBPF11
ATP5G3	ATP5G3
RPS26	RPS26
MIS18BP1	MIS18BP1
PDLIM7	PDLIM7
EED	EED
MRPL16	MRPL16
MYL9	MYL9
TMEM143	TMEM143
TNS3	TNS3
COL6A1	COL6A1
RAB31	RAB31
SNORD49B	SNORD49B
SRBD1	SRBD1
PNRC2	PNRC2
PSPC1	PSPC1
CAPN8	CAPN8
PCYT2	PCYT2
CLK1	CLK1
HOXD10	HOXD10
SGOL1-AS1	SGOL1-AS1
TIMM10B	TIMM10B
EXT1	EXT1
CSTF2	CSTF2
MYH10	MYH10
HSPG2	HSPG2
KRT8P11	KRT8P11
PDLIM2	PDLIM2
RAD21	RAD21
HHEX	HHEX
KIAA1244	KIAA1244
DBF4B	DBF4B
TMEM50B	TMEM50B
SPDL1	SPDL1
FLNA	FLNA
PPP2R5B	PPP2R5B
ARSB	ARSB
FBXW7	FBXW7
GPR64	GPR64
PRDM10	PRDM10
CABLES2	CABLES2
PICK1	PICK1
USP37	USP37
KIDINS220	KIDINS220
PTDSS1	PTDSS1
SPSB3	SPSB3
DNAJC1	DNAJC1
HSPA1L	HSPA1L
PPP1R1A	PPP1R1A
GID4	GID4
HCFC1	HCFC1
SLC7A6	SLC7A6
KCMF1	KCMF1
MAP1B	MAP1B
TOE1	TOE1
GAS5	GAS5
SLC12A8	SLC12A8
KLHL24	KLHL24
PIGU	PIGU
GTF2H2C_2	GTF2H2C_2
TRAPPC2	TRAPPC2
ULK4P3	ULK4P3
ATP11A	ATP11A
HIST1H2BE	HIST1H2BE
ATP2A2	ATP2A2
ZSCAN21	ZSCAN21
KLHL25	KLHL25
MPP1	MPP1
RNF144B	RNF144B
ZNF689	ZNF689
FNDC3B	FNDC3B
TMSB4X	TMSB4X
GLIS2	GLIS2
SP2	SP2
HBEGF	HBEGF
NPIPA1	NPIPA1
PTP4A3	PTP4A3
FLYWCH1	FLYWCH1
FAM178B	FAM178B
AFAP1	AFAP1
TRIM28	TRIM28
LOC728208	LOC728208
SYK	SYK
ZSCAN29	ZSCAN29
RDX	RDX
MAOB	MAOB
DGKD	DGKD
TLR4	TLR4
KAT6B	KAT6B
AMOT	AMOT
SEC16A	SEC16A
TMEM171	TMEM171
PRC1	PRC1
TGDS	TGDS
RTKN2	RTKN2
USP1	USP1
ZNF57	ZNF57
NR2F2	NR2F2
PRPF38A	PRPF38A
CCNJ	CCNJ
WLS	WLS
ADCK3	ADCK3
TUBB4B	TUBB4B
TTLL5	TTLL5
YAE1D1	YAE1D1
SMAP2	SMAP2
NDRG3	NDRG3
METTL14	METTL14
SMCO2	SMCO2
PPT1	PPT1
PPAP2B	PPAP2B
PCBD2	PCBD2
PPP4R1L	PPP4R1L
HDAC1	HDAC1
ARL4C	ARL4C
BTBD7	BTBD7
RASGEF1A	RASGEF1A
SLC22A4	SLC22A4
IGHEP1	IGHEP1
GGA2	GGA2
MANEAL	MANEAL
RASL11B	RASL11B
SLC26A2	SLC26A2
EHD2	EHD2
PARM1	PARM1
NDEL1	NDEL1
ARL6IP6	ARL6IP6
SEC13	SEC13
FASN	FASN
NASP	NASP
ALG12	ALG12
FGD5-AS1	FGD5-AS1
ADCY9	ADCY9
ARL4D	ARL4D
RLBP1	RLBP1
ATXN2L	ATXN2L
SMPDL3A	SMPDL3A
TMEM2	TMEM2
TMEM39B	TMEM39B
MIR10A	MIR10A
LOC100133445	LOC100133445
TTPA	TTPA
TTC21B	TTC21B
PPWD1	PPWD1
SPON1	SPON1
SPATA2	SPATA2
NXT2	NXT2
LRRC75A	LRRC75A
SUSD4	SUSD4
SLC35E3	SLC35E3
FOXK2	FOXK2
KLHL20	KLHL20
WRAP53	WRAP53
ALG1	ALG1
B3GNT3	B3GNT3
SLC39A13	SLC39A13
GYG1	GYG1
HSPB1	HSPB1
SEPT7P2	SEPT7P2
DENND5B	DENND5B
SRSF3	SRSF3
AGPS	AGPS
STRADA	STRADA
LOC100507420	LOC100507420
RPP30	RPP30
CAND1	CAND1
RHOQ	RHOQ
BPTF	BPTF
RIOK3	RIOK3
SERAC1	SERAC1
APLN	APLN
GATSL3	GATSL3
TSPAN6	TSPAN6
MTSS1L	MTSS1L
AP1S2	AP1S2
RP11-1029J19.5	RP11-1029J19.5
FLAD1	FLAD1
FFAR3	FFAR3
FAM127B	FAM127B
CDC14A	CDC14A
TIAM1	TIAM1
FLJ45248	FLJ45248
AC107072.2	AC107072.2
GOLGA2P7	GOLGA2P7
ASMTL	ASMTL
SLC4A11	SLC4A11
TCEA2	TCEA2
ELFN1	ELFN1
MARVELD1	MARVELD1
GPATCH1	GPATCH1
DCTN6	DCTN6
RP11-360F5.3	RP11-360F5.3
RP11-495K9.9	RP11-495K9.9
SLC35B2	SLC35B2
ESCO1	ESCO1
ATP13A3	ATP13A3
THBS3	THBS3
RP11-34P13.7	RP11-34P13.7
NOL6	NOL6
LBX2-AS1	LBX2-AS1
TRA2B	TRA2B
DMXL2	DMXL2
IGFBPL1	IGFBPL1
HIST1H4B	HIST1H4B
LOC101928451	LOC101928451
ATF6	ATF6
NPAS2	NPAS2
PHYKPL	PHYKPL
PCF11	PCF11
LOC102724467	LOC102724467
SAAL1	SAAL1
COMMD4	COMMD4
GPR125	GPR125
SENP1	SENP1
HLA-B	HLA-B
RECQL	RECQL
MGA	MGA
MN1	MN1
ZNF251	ZNF251
ANXA3	ANXA3
B4GALNT3	B4GALNT3
IDS	IDS
RC3H1	RC3H1
HAT1	HAT1
DBH	DBH
MAP3K10	MAP3K10
PELI2	PELI2
POP4	POP4
HELZ2	HELZ2
SUPV3L1	SUPV3L1
LAPTM5	LAPTM5
SLC36A4	SLC36A4
HES7	HES7
TMTC3	TMTC3
LRRC45	LRRC45
LIN9	LIN9
NUAK2	NUAK2
VANGL1	VANGL1
GLB1L2	GLB1L2
AMMECR1L	AMMECR1L
CAMK2D	CAMK2D
2-Mar	2-Mar
CUEDC1	CUEDC1
CASP8AP2	CASP8AP2
HAUS8	HAUS8
ZNF776	ZNF776
TMEM182	TMEM182
RP11-267J23.4	RP11-267J23.4
KIAA1217	KIAA1217
SMC6	SMC6
NSF	NSF
TANC1	TANC1
LARP6	LARP6
FEM1C	FEM1C
NAV1	NAV1
HK2	HK2
C6orf223	C6orf223
SPRYD4	SPRYD4
GDAP2	GDAP2
SAMD1	SAMD1
EXOSC7	EXOSC7
MTRF1	MTRF1
RPL13P5	RPL13P5
TERF1	TERF1
RNASEH2C	RNASEH2C
CNNM2	CNNM2
SNORA1	SNORA1
LMBRD1	LMBRD1
OLFM1	OLFM1
FBXO31	FBXO31
SOCS6	SOCS6
SDF2	SDF2
LOC100506596	LOC100506596
C9orf16	C9orf16
KCNQ4	KCNQ4
LINC01004	LINC01004
SMG9	SMG9
KRT71	KRT71
MACF1	MACF1
PRR9	PRR9
CTGF	CTGF
LOC100132240	LOC100132240
TMEM136	TMEM136
DANCR	DANCR
SNORD14C	SNORD14C
ZMIZ2	ZMIZ2
FAM206A	FAM206A
HIBCH	HIBCH
ZNF326	ZNF326
CCND3	CCND3
GCC1	GCC1
STRIP2	STRIP2
CARKD	CARKD
AXIN1	AXIN1
PSMD1	PSMD1
ZXDB	ZXDB
COA3	COA3
RNU2-58P	RNU2-58P
IL6ST	IL6ST
LOC646719	LOC646719
PFN2	PFN2
TIPARP	TIPARP
PIK3CD	PIK3CD
PGPEP1	PGPEP1
C8orf44-SGK3	C8orf44-SGK3
CHCHD4	CHCHD4
VRK1	VRK1
HPS1	HPS1
CHST12	CHST12
PAG1	PAG1
INTS6	INTS6
TOM1L2	TOM1L2
CST7	CST7
SH2B3	SH2B3
CYP24A1	CYP24A1
LINC00491	LINC00491
SLC25A10	SLC25A10
SIK1	SIK1
FOSL2	FOSL2
ZNF787	ZNF787
CDC34	CDC34
SLC23A2	SLC23A2
DNHD1	DNHD1
LRRC40	LRRC40
HGS	HGS
ARHGEF39	ARHGEF39
DDX21	DDX21
CYB561A3	CYB561A3
DNAJA1	DNAJA1
TMEM98	TMEM98
PPP1CC	PPP1CC
NRDE2	NRDE2
OXLD1	OXLD1
CCDC126	CCDC126
NDUFS3	NDUFS3
GLI3	GLI3
CLGN	CLGN
ARHGAP11B	ARHGAP11B
RP11-1277A3.1	RP11-1277A3.1
LOC101930660	LOC101930660
PRR11	PRR11
STXBP3	STXBP3
PROCR	PROCR
WDR6	WDR6
ZNF180	ZNF180
KIAA1211	KIAA1211
FXYD5	FXYD5
PPARA	PPARA
PEAK1	PEAK1
TLE4	TLE4
PKD1	PKD1
PPP4R1	PPP4R1
SLC16A2	SLC16A2
TMEM120B	TMEM120B
PTPRE	PTPRE
TET1	TET1
ANKRD20A9P	ANKRD20A9P
RECK	RECK
SETMAR	SETMAR
SUMO2	SUMO2
CREB3L4	CREB3L4
B4GALT6	B4GALT6
VAMP1	VAMP1
ABTB1	ABTB1
CTD-3138B18.5	CTD-3138B18.5
SYNGR3	SYNGR3
MIR4740	MIR4740
DHRS4L1	DHRS4L1
FAM135A	FAM135A
GH2	GH2
NFKBIB	NFKBIB
HSPA2	HSPA2
GTF3C2	GTF3C2
SRC	SRC
COASY	COASY
RP11-675F6.3	RP11-675F6.3
TPSB2	TPSB2
ANO1	ANO1
PLCD3	PLCD3
[truncated: 7,884 more rows]
