# Supplementary material for: A subset of CB002 xanthine analogs bypass p53-signaling to restore a p53 transcriptome and target an S-phase cell cycle checkpoint in tumors with mutated-p53
Source: eLife. 2021 Jul 29;10:e70429. doi: 10.7554/eLife.70429 (PMC8321552; doi:10.7554/eLife.70429)
Supplement: Supplementary file 3. — The present table includes protein names and their expression values without the FDR of 1% as a filter and therefore referred as raw proteomic data. [file elife-70429-supp3.xlsx]

## Sheet: Proteins
Accession	Description	Exp. q-value: Combined	Sum PEP Score	Coverage [%]	# Peptides	# PSMs	# Unique Peptides	# AAs	MW [kDa]	calc. pI	Score Sequest HT: Sequest HT	# Peptides (by Search Engine): Sequest HT	Pfam IDs	Entrez Gene ID	Gene Symbol	Chromosome	Ensembl Gene ID	WikiPathways	KEGG Pathways	Reactome Pathways	# Protein Pathway Groups	# Razor Peptides	Abundance Ratio: (DMSO) / (CB002)	Abundance Ratio: (DMSO) / T4 (Analogue #4)	Abundance Ratio: (CB002) / T4 (Analogue #4)	Abundance Ratio Adj. P-Value: (DMSO) / (CB002)	Abundance Ratio Adj. P-Value: (DMSO) / T4 (Analogue #4)	Abundance Ratio Adj. P-Value: (CB002) / T4 (Analogue #4)	Abundance Ratio Variability [%]: (DMSO) / (CB002)	Abundance Ratio Variability [%]: (DMSO) / T4 (Analogue #4)	Abundance Ratio Variability [%]: (CB002) / T4 (Analogue #4)	Abundances (Grouped): DMSO	Abundances (Grouped): CB002	Abundances (Grouped): T4 (Analogue #4)	Abundances (Grouped) CV [%]: DMSO	Abundances (Grouped) CV [%]: CB002	Abundances (Grouped) CV [%]: T4 (Analogue #4)	Abundance: F1: Sample, DMSO	Abundance: F2: Sample, DMSO	Abundance: F3: Sample, DMSO	Abundance: F4: Sample, CB002	Abundance: F5: Sample, CB002	Abundance: F6: Sample, CB002	Abundance: F7: Sample, T4 (Analogue #4)	Abundance: F8: Sample, T4 (Analogue #4)	Abundance: F9: Sample, T4 (Analogue #4)	Abundances Count: F1: Sample, DMSO	Abundances Count: F2: Sample, DMSO	Abundances Count: F3: Sample, DMSO
EAW70162.1	heat shock 10kDa protein 1 (chaperonin 10), isoform CRA_h [OS=Homo sapiens]	0	51.873	100	6	98	1	47	5.2	4.72	189.94	6	Pf00166	3336	HSPE1	2	ENSG00000115541.10				0	0	1.088	1.631	1.5	0.839147	0.0676635	0.0221867	13.15	42.02	42.02	118.5	108.9	72.6	2.33	13.54	38.03	133622616	116138016	121576968	126188376	100858440	89110128	104748656	73563488	45917956	1	1	1
NP_002296.1	Galectin-1 [OS=Homo sapiens]	0	168.247	96	16	215	16	135	14.7	5.5	517.16	16	Pf00337	3956	LGALS1	22	ENSG00000100097.11			Post-translational protein phosphorylation; Regulation of Insulin-like Growth Factor (IGF) transport and uptake by Insulin-like Growth Factor Binding Proteins (IGFBPs)	4	0	1.024	0.885	0.856	0.99773	0.578989	0.428975	35.48	25.54	24.22	101.8	91.8	106.4	2.3	9.05	0.29	5.93701e+08	5.39588e+08	5.86679e+08	5.91091e+08	4.35642e+08	4.85741e+08	5.94532e+08	5.82341e+08	5.75326e+08	14	14	15
NP_066932.1	Thymosin beta-4 [OS=Homo sapiens]	0	88.981	93	6	68	6	44	5.1	5.06	140.47	6	Pf01290	7114	TMSB4X	X	ENSG00000205542.10	TarBasePathway; Regulation of Actin Cytoskeleton	Regulation of actin cytoskeleton	Platelet degranulation	7	0	1.137	1.023	0.929	0.615041	0.937759	0.741088	55.73	53.04	28.21	102.2	98.1	99.7	25.26	33.99	18.6	1.71027e+08	2.42512e+08	2.61594e+08	1.31125e+08	2.32562e+08	2.30471e+08	1.79139e+08	2.5161e+08	2.40638e+08	6	6	6
NP_066926.1	thymosin beta-10 [OS=Homo sapiens]	0	96.351	93	7	108	7	44	5	5.36	240.65	7		9168	TMSB10	2	ENSG00000034510.5				0	0	1.145	1.731	1.379	0.583645	0.0289471	0.11209	27.3	44.5	36.56	128	97.2	74.8	3.53	7.18	3.26	6.63828e+08	5.6797e+08	588227277	517262238	3.97165e+08	4.30788e+08	3.59847e+08	3.43169e+08	328002923	7	6	6
AAA35714.1	retinol-binding protein, partial [OS=Homo sapiens]	0	255.933	93	14	221	3	121	14.3	4.88	764.51	14	Pf00061	5947	RBP1	3		Retinoblastoma (RB) in Cancer; Vitamin A and Carotenoid Metabolism			2	11	1.112	1.041	0.995	0.743705	0.967226	0.931669	27.45	33.31	25.18	111.1	93.2	95.7	10.16	14.62	6.33	7.6956e+08	5.52243e+08	6.3964e+08	6.73736e+08	4.65953e+08	4.86522e+08	5.94264e+08	5.23668e+08	5.18395e+08	14	14	14
CAA25918.1	unnamed protein product [OS=Homo sapiens]	0	45.601	92	1	37	1	39	4	4.55	274.47	1	Pf00080	6647	SOD1	21		Selenium Micronutrient Network; Vitamin B12 Metabolism; Folate Metabolism; AGE/RAGE pathway; Dopamine metabolism; Amyotrophic lateral sclerosis (ALS); Oxidative Stress			7	0	1.34	0.991	0.816	0.0522952	0.880822	0.244084	6.94	4.41	18.35	109.3	80.2	110.5	2.5	9.34	7.69	7.12933e+07	5.92231e+07	65736686	4.77978e+07	4.17571e+07	5.18078e+07	6.62323e+07	6.31918e+07	5.5602e+07	1	1	1
EAW74448.1	cofilin 1 (non-muscle), isoform CRA_a [OS=Homo sapiens]	0	253.195	89	16	273	3	149	16.8	8.35	677.75	16	Pf00241	1072	CFL1	11	ENSG00000172757.12	Brain-Derived Neurotrophic Factor (BDNF) signaling pathway; VEGFA-VEGFR2 Signaling Pathway; EGF/EGFR Signaling Pathway; Regulation of Actin Cytoskeleton; G13 Signaling Pathway			5	13	1.07	1.146	0.995	0.884814	0.898596	0.931583	35.98	42.4	42.87	103.8	101.3	94.9	1.92	3.49	10	8.35579e+08	7.02132e+08	7.81392e+08	7.306e+08	6.62054e+08	7.26521e+08	6.1583e+08	7.37895e+08	6.73519e+08	14	13	12
NP_002148.1	10 kDa heat shock protein, mitochondrial [OS=Homo sapiens]	0	102.963	88	15	200	2	102	10.9	8.92	352.02	15	Pf00166	3336	HSPE1	2	ENSG00000115541.10				0	13	0.97	1.048	1.075	0.846979	0.970674	0.924192	25.42	22.78	28.32	98.7	98.7	102.6	1.55	5.82	6.21	8.22388e+08	7.12814e+08	7.57868e+08	8.25914e+08	6.73134e+08	6.83487e+08	7.38992e+08	8.19631e+08	7.59808e+08	12	14	12
NP_000025.1	fructose-bisphosphate aldolase A isoform 1 [OS=Homo sapiens]	0	477.728	88	28	435	26	364	39.4	8.09	1340.32	28	Pf00274	226	ALDOA	16	ENSG00000149925.17	Glycolysis and Gluconeogenesis; Sudden Infant Death Syndrome (SIDS) Susceptibility Pathways	Fructose and mannose metabolism; Glycolysis / Gluconeogenesis; Carbon metabolism; Biosynthesis of amino acids; Metabolic pathways; Pentose phosphate pathway; HIF-1 signaling pathway	Platelet degranulation ; Gluconeogenesis; Glycolysis; Neutrophil degranulation	21	2	1.031	1.04	1.028	0.995934	0.966327	0.994766	21.71	35.94	28.7	110.4	104.4	85.3	6.57	8.05	8.66	2.56083e+09	2.01772e+09	2.15798e+09	2.22832e+09	1.80253e+09	1.7593e+09	1.88952e+09	1.58923e+09	1.59882e+09	28	28	27
NP_001243728.1	Glyceraldehyde-3-phosphate dehydrogenase isoform 2 [OS=Homo sapiens]	0	772.667	87	34	1504	3	293	31.5	7.61	5113.16	34	Pf00044, Pf02800	2597	GAPDH	12	ENSG00000111640.14	Cori Cycle; Alzheimers Disease; Glycolysis and Gluconeogenesis; Sudden Infant Death Syndrome (SIDS) Susceptibility Pathways			4	0	1.014	1.018	1.01	0.984013	0.923017	0.964482	6.58	1.69	7.34	100.8	100.1	99.1	4.23	6.51	3.56	661978112	6.23225e+08	6.3262e+08	622147968	589730346	5.48463e+08	6.02788e+08	6.25675e+08	5.82487e+08	1	1	1
NP_003281.1	tropomyosin alpha-4 chain isoform Tpm4.2cy [OS=Homo sapiens]	0	405.461	87	26	285	17	248	28.5	4.69	896.74	26	Pf00261, Pf12718	7171	TPM4	19	ENSG00000167460.14	Striated Muscle Contraction	Adrenergic signaling in cardiomyocytes; Hypertrophic cardiomyopathy (HCM); Cardiac muscle contraction; Dilated cardiomyopathy	Smooth Muscle Contraction; Striated Muscle Contraction	8	8	1.059	0.971	0.961	0.915175	0.830899	0.857012	25.91	34.85	30.05	108.1	96.8	95.1	3.19	2.82	2.37	8.55475e+08	789194372	8.59403e+08	7.61111e+08	6.92867e+08	6.93559e+08	7.1514e+08	7.17181e+08	7.29453e+08	24	24	24
AAB22818.1	fructose-1,6-bisphosphate aldolase A, aldolase A [OS=Homo sapiens]	0	20.279	87	2	24	2	15	1.8	6.37	57.97	2									0	0	1.063	1.033	0.974	0.93462	0.953602	0.883272	5.36	9.22	4.36	103.1	97.1	99.8	1.17	0.3	2.53	54973934	4.86496e+07	53424056	4.91414e+07	4.3356e+07	4.57459e+07	5.07473e+07	4.86209e+07	4.69361e+07	2	2	2
NP_004030.1	Annexin A2 isoform 2 [OS=Homo sapiens]	0	706.592	86	46	1142	46	339	38.6	7.75	2837.52	46	Pf00191	302	ANXA2	15	ENSG00000182718.16	Prostaglandin Synthesis and Regulation		Dissolution of Fibrin Clot; Gene and protein expression by JAK-STAT signaling after Interleukin-12 stimulation; Smooth Muscle Contraction; Neutrophil degranulation; Interleukin-12 family signaling	12	0	0.974	0.874	0.925	0.859975	0.533196	0.726965	27.02	31.49	29.55	93.6	101.3	105.1	10.6	10.11	8.07	4.6327e+09	4.91599e+09	5.28758e+09	4.73997e+09	4.99198e+09	5.25578e+09	5.00642e+09	5.64463e+09	5.63732e+09	45	47	45
BAF83540.1	unnamed protein product [OS=Homo sapiens]	0	241.398	86	15	378	15	165	18	6.9	806.57	15	Pf00160	5478	PPIA	7		Prolactin Signaling Pathway			1	0	0.948	0.926	0.977	0.747739	0.71969	0.889232	32.5	22.27	23.23	95.6	99.2	105.1	4.45	6.86	2.89	2.77956e+09	2.23351e+09	2.61063e+09	2.99659e+09	2.35224e+09	2.46101e+09	2.70994e+09	2.72678e+09	2.79298e+09	17	19	19
AAB32876.1	neuropolypeptide h3 [OS=Homo sapiens]	0	150.689	86	12	92	12	186	20.9	7.53	293.13	12	Pf01161								0	0	0.991	0.886	0.874	0.908024	0.580481	0.517979	30.73	37.29	28.05	89.5	100.8	109.7	8.02	7.89	9.9	1.78926e+08	1.33034e+08	1.59728e+08	1.81121e+08	1.37083e+08	1.65266e+08	1.87191e+08	2.1822e+08	1.84572e+08	12	12	12
NP_005685.1	cytochrome C oxidase copper chaperone [OS=Homo sapiens]	0	24.545	86	3	10	3	63	6.9	7.24	13.09	3	Pf05051	10063	COX17	3	ENSG00000138495.6	Electron Transport Chain; Copper homeostasis	Oxidative phosphorylation; Metabolic pathways	Mitochondrial protein import; Metabolism of proteins	6	0	1.24	1.59	1.312	0.676142	0.0926966	0.23317	39.92	15.33	34.64	140.9	92.2	66.9	17.88	3.42	12.03	9.88891e+06	8.22586e+06	6.61965e+06	5.47422e+06	5.08326e+06	5.40386e+06	4.11474e+06	3922661	4.82722e+06	3	3	3
NP_003371.2	Vimentin [OS=Homo sapiens]	0	586.726	86	52	569	48	466	53.6	5.12	1437.93	52	Pf00038, Pf04111, Pf04156, Pf04732, Pf05622, Pf10186	7431	VIM	10	ENSG00000026025.15	Allograft Rejection; Spinal Cord Injury; Primary Focal Segmental Glomerulosclerosis FSGS; Apoptosis-related network due to altered Notch3 in ovarian cancer; Striated Muscle Contraction; TGF-B Signaling in Thyroid Cells for Epithelial-Mesenchymal Transition; T-Cell antigen Receptor (TCR) Signaling Pathway	MicroRNAs in cancer; Epstein-Barr virus infection	Interleukin-4 and 13 signaling; Caspase-mediated cleavage of cytoskeletal proteins; Striated Muscle Contraction	20	2	1.069	1.026	0.978	0.887638	0.941075	0.893002	39.32	33.12	38.38	100.1	102.8	97.1	15	20.41	17.46	1.55122e+09	1.73537e+09	1.97017e+09	1.31914e+09	1.7011e+09	1.77923e+09	1.3202e+09	1.73805e+09	1.80416e+09	47	45	46
NP_821133.1	tubulin beta chain isoform b [OS=Homo sapiens]	0	776.978	86	39	1110	4	444	49.6	4.89	3125.54	39	Pf00091, Pf03953, Pf10644	203068	TUBB	6; CHR_HSCHR6_MHC_MANN_CTG1; CHR_HSCHR6_MHC_COX_CTG1; CHR_HSCHR6_MHC_APD_CTG1; CHR_HSCHR6_MHC_DBB_CTG1; CHR_HSCHR6_MHC_MCF_CTG1; CHR_HSCHR6_MHC_QBL_CTG1; CHR_HSCHR6_MHC_SSTO_CTG1	ENSG00000232575.10; ENSG00000196230.12; ENSG00000227739.10; ENSG00000224156.10; ENSG00000235067.10; ENSG00000229684.10; ENSG00000183311.16; ENSG00000232421.10	Pathogenic Escherichia coli infection; Parkin-Ubiquitin Proteasomal System pathway	Pathogenic Escherichia coli infection; Gap junction; Phagosome	Neutrophil degranulation; Regulation of PLK1 Activity at G2/M Transition; AURKA Activation by TPX2; Anchoring of the basal body to the plasma membrane; Recruitment of NuMA to mitotic centrosomes; Loss of Nlp from mitotic centrosomes; Recruitment of mitotic centrosome proteins and complexes	24	47	0.962	0.969	1.011	0.818333	0.824388	0.964745	35.39	40.52	29.41	101.8	102.5	95.7	3.77	4.58	12.33	3.8523e+09	3.4628e+09	3.94047e+09	3.52299e+09	3.29048e+09	3.57555e+09	2.82138e+09	3.51507e+09	3.33761e+09	44	46	45
AAH24038.1	Tubulin, beta 2c [OS=Homo sapiens]	0	773.351	85	38	1080	2	445	49.8	4.92	3038.61	38	Pf00091, Pf03953, Pf10644	10383	TUBB4B	9		Pathogenic Escherichia coli infection; Parkin-Ubiquitin Proteasomal System pathway			2	7	1.056	0.99	1.062	0.928864	0.876673	0.94848	24.74	41.95	36.74	104	101.3	94.7	2.02	6.48	11.48	5.34992e+08	4.65262e+08	4.89566e+08	4.42698e+08	4.40032e+08	4.52872e+08	3.8615e+08	4.3818e+08	4.7321e+08	7	8	8
NP_001854.1	Cytochrome c oxidase subunit 6B1 [OS=Homo sapiens]	0	52.721	85	5	65	5	86	10.2	7.05	209.61	5	Pf02297	1340	COX6B1	19	ENSG00000126267.8	Electron Transport Chain	Non-alcoholic fatty liver disease (NAFLD); Cardiac muscle contraction; Alzheimer's disease; Huntington's disease; Metabolic pathways; Oxidative phosphorylation; Parkinson's disease	TP53 Regulates Metabolic Genes; Respiratory electron transport	17	0	0.921	1.051	1.207	0.693824	0.972391	0.557742	14.98	27.57	21.43	99.6	113	87.4	4.59	10.7	11.5	3.38043e+07	3.20114e+07	3.22909e+07	3.028e+07	3.24553e+07	3.36588e+07	2.40346e+07	2.96907e+07	2.67181e+07	5	5	5
NP_005944.1	metallothionein-2 [OS=Homo sapiens]	0	64.6	84	5	43	2	61	6	7.83	115.99	5		4502	MT2A	16	ENSG00000125148.6	Copper homeostasis; Zinc homeostasis; Lung fibrosis	Mineral absorption	Metallothioneins bind metals; Interferon gamma signaling	11	3	0.895	0.845	1.14	0.645745	0.422766	0.768443	67.16	89.68	114.32	13.6	14.5	271.9	18.79	69.3	34.77	1.3267e+07	1.61982e+07	1.80159e+07	9.62338e+06	1.62749e+07	3.74986e+07	1.73086e+08	3.45107e+08	3.32315e+08	6	5	4
NP_002645.3	pyruvate kinase PKM isoform a [OS=Homo sapiens]	0	1030.44	83	54	1272	10	531	57.9	7.84	4183.42	54	Pf00224, Pf02887	5315	PKM	15	ENSG00000067225.17	Photodynamic therapy-induced HIF-1 survival signaling; Amino Acid metabolism; Glycolysis and Gluconeogenesis	Biosynthesis of amino acids; Type II diabetes mellitus; Carbon metabolism; Metabolic pathways; Glucagon signaling pathway; Purine metabolism; Viral carcinogenesis; Glycolysis / Gluconeogenesis; Pyruvate metabolism; Central carbon metabolism in cancer	Glycolysis; Neutrophil degranulation	20	48	1.008	0.955	0.916	0.966759	0.799574	0.701181	37.75	30.53	32.64	97.7	97.7	104.6	9.79	11.49	5.79	3.28187e+09	2.42373e+09	2.6468e+09	3.13367e+09	2.23611e+09	2.43279e+09	3.00949e+09	2.69283e+09	2.6354e+09	53	53	55
EAW87089.1	hCG1984476, isoform CRA_b [OS=Homo sapiens]	0	141.863	82	13	74	13	131	14.7	6.76	166.2	13	Pf00061								0	0	0.795	0.813	1.03	0.0190031	0.31431	0.997406	26.24	29.72	23.69	84.5	108.1	107.4	21.38	6.56	11.8	1.03994e+08	63717621	6.95391e+07	9.78312e+07	7.62633e+07	8.17532e+07	9.89023e+07	7.69284e+07	8.33722e+07	12	12	12
AAO21313.1	lung cancer oncogene 7 [OS=Homo sapiens]	0	238.763	82	22	186	22	347	37.9	8.24	482.94	22	Pf00400								0	0	0.972	1.014	1.023	0.855953	0.917268	0.985052	29.39	35.37	27.34	103.3	100.8	95.9	6.44	14.54	4.1	5.01664e+08	3.8585e+08	4.40097e+08	5.08196e+08	3.35644e+08	3.94626e+08	4.23964e+08	3.88583e+08	3.8334e+08	21	20	21
EAW58049.1	alpha tubulin, isoform CRA_b [OS=Homo sapiens]	0	528.337	82	33	989	1	416	46.3	5.08	3058.29	33	Pf00091, Pf03953	10376	TUBA1B	12		Pathogenic Escherichia coli infection; Parkin-Ubiquitin Proteasomal System pathway			2	35	1.005	0.976	0.974	0.957546	0.842096	0.883272	27.49	31.96	31.44	96.4	100.9	102.7	5.9	5.78	8.62	2.87767e+09	2.5365e+09	3.03501e+09	2.74078e+09	2.50718e+09	2.84781e+09	2.52277e+09	2.79193e+09	2.91031e+09	33	34	33
NP_003555.1	transgelin-2 isoform b [OS=Homo sapiens]	0	152.166	82	16	146	16	199	22.4	8.25	382.04	16	Pf00307, Pf00402	8407	TAGLN2	1	ENSG00000158710.14			Platelet degranulation	4	0	1.22	1.154	0.977	0.208082	0.890519	0.890398	29.68	27.92	24.66	112.1	90.5	97.4	6.04	11.58	6.21	3.78315e+08	2.98374e+08	3.23692e+08	3.11615e+08	2.22631e+08	2.40719e+08	2.85855e+08	2.67811e+08	2.45721e+08	15	15	15
AAC39935.1	alpha enolase like 1, partial [OS=Homo sapiens]	0	394.025	82	21	721	1	269	29.5	5.82	2371.11	21	Pf00113, Pf13378								0	0	0.878	0.599	0.682	0.856797	0.174956	0.152943	3.87	26.57	26.62	78.8	89.7	131.5	3.78	3.74	20.92		407630	420216		415672	463482	538090	684896	802593		1	1
BAB15500.1	unnamed protein product [OS=Homo sapiens]	0	165.785	82	7	93	7	126	13.8	6.52	269.99	7	Pf01230, Pf11969	3094	HINT1	5					0	0	0.983	1.044	1.077	0.881607	0.967812	0.917374	19.31	19.47	26.07	99.2	100.1	100.7	7.76	12.62	2.41	3.37437e+08	2.56071e+08	2.8367e+08	3.49937e+08	2.48011e+08	2.62978e+08	2.89565e+08	2.71228e+08	2.71701e+08	6	7	7
NP_004915.2	alpha-actinin-4 isoform 1 [OS=Homo sapiens]	0	1432.57	81	94	1395	66	911	104.8	5.44	3912.31	94	Pf00307, Pf00435, Pf08726, Pf11971, Pf13499	81	ACTN4	19; CHR_HG26_PATCH	ENSG00000282844.1; ENSG00000130402.11	Arrhythmogenic Right Ventricular Cardiomyopathy; Primary Focal Segmental Glomerulosclerosis FSGS; Striated Muscle Contraction	Adherens junction; Arrhythmogenic right ventricular cardiomyopathy (ARVC); Regulation of actin cytoskeleton; Tight junction; Viral carcinogenesis; Systemic lupus erythematosus; Leukocyte transendothelial migration; Focal adhesion; Amoebiasis	Platelet degranulation ; Nephrin family interactions	18	30	0.961	0.849	0.9	0.81664	0.438535	0.637698	28.04	35.94	29.35	96.5	97	106.5	0.48	5.79	1.49	4.39669e+09	3.8677e+09	4.21223e+09	4.60691e+09	3.67212e+09	3.86039e+09	4.43592e+09	4.47852e+09	4.38011e+09	90	90	90
BAD96752.1	beta actin variant, partial [OS=Homo sapiens]	0	905.241	81	33	2577	1	375	41.7	5.59	8954.39	33	Pf00022	60	ACTB	7		Arrhythmogenic Right Ventricular Cardiomyopathy; Pathogenic Escherichia coli infection; Myometrial Relaxation and Contraction Pathways; Focal Adhesion; Fas Ligand (FasL) pathway and Stress induction of Heat Shock Proteins (HSP) regulation; Regulation of Actin Cytoskeleton			6	2	0.922	0.648	0.78	0.696979	0.0191129	0.131222	53.34	74.08	82.62	94.7	109.9	95.4	39.1	77.65	46.95	2.82528e+07	4.8171e+07	2.9186e+07	1.03372e+08	2.3528e+07	3.11194e+07	5.56745e+07	2.39274e+07	2.77159e+07	3	3	3
CAA45026.1	mutant beta-actin (beta'-actin) [OS=Homo sapiens]	0	815.386	81	32	1907	2	375	41.8	5.39	6083.83	32	Pf00022	60	ACTB	7		Arrhythmogenic Right Ventricular Cardiomyopathy; Pathogenic Escherichia coli infection; Myometrial Relaxation and Contraction Pathways; Focal Adhesion; Fas Ligand (FasL) pathway and Stress induction of Heat Shock Proteins (HSP) regulation; Regulation of Actin Cytoskeleton			6	0	0.01	0.01	0.58	2.97569e-16	1.62313e-16	0.00701618			15.11		112.3	187.7		14.8	13.85				820712		939206	1.49074e+06	1727810	1.30824e+06
NP_001605.1	Actin, cytoplasmic 2 [OS=Homo sapiens]	0	931.093	81	33	2550	1	375	41.8	5.48	8750.45	33	Pf00022	71	ACTG1	17	ENSG00000184009.9	Arrhythmogenic Right Ventricular Cardiomyopathy; Pathogenic Escherichia coli infection; Common Pathways Underlying Drug Addiction; Myometrial Relaxation and Contraction Pathways; Focal Adhesion; Fas Ligand (FasL) pathway and Stress induction of Heat Shock Proteins (HSP) regulation; Striated Muscle Contraction; Regulation of Actin Cytoskeleton	Regulation of actin cytoskeleton; Focal adhesion; Rap1 signaling pathway; Platelet activation; Tight junction; Vibrio cholerae infection; Salmonella infection; Phagosome; Dilated cardiomyopathy; Influenza A; Leukocyte transendothelial migration; Oxytocin signaling pathway; Shigellosis; Adherens junction; Hippo signaling pathway; Hypertrophic cardiomyopathy (HCM); Proteoglycans in cancer; Pathogen…	Signaling by BRAF and RAF fusions; Formation of annular gap junctions; Cell-extracellular matrix interactions; MAP2K and MAPK activation; Clathrin-mediated endocytosis; Interaction between L1 and Ankyrins; VEGFA-VEGFR2 Pathway; RHO GTPases activate IQGAPs; Signaling by RAS mutants; Recycling pathway of L1; Signaling by high-kinase activity BRAF mutants; Signaling by moderate kinase activity BRAF …	80	0	0.926	0.106	0.132	0.85549	1.62313e-16	1.7785e-16	125.71	93	104.47	30.9	26.5	242.6	46.5	94.77	46.26	4.74496e+06	5.5265e+06	2.12477e+06	3.8287e+06	1.66414e+06	1.19987e+07	3.42852e+07	1.93034e+07	5.10302e+07	2	2	2
AAH01896.1	TUBB protein, partial [OS=Homo sapiens]	0	485.567	81	30	774	1	340	38.3	4.84	1734.75	30	Pf00091, Pf03953	203068	TUBB	6		Pathogenic Escherichia coli infection; Parkin-Ubiquitin Proteasomal System pathway			2	0	1.026	0.69	0.669	0.980794	0.314528	0.107413	13.7	17.24	10.59	87.4	85.2	127.4	18.84	6.41	11.32	650579	800293	661504	638375	616906	579504	1.08019e+06	850180	908843	1	1	1
BAD96912.1	enolase 1 variant, partial [OS=Homo sapiens]	0	627.846	81	37	1120	8	434	47.2	7.39	3408.64	37	Pf00113, Pf03952, Pf13378	2023	ENO1	1		Glycolysis and Gluconeogenesis			1	29	0.96	0.942	0.967	0.810198	0.766554	0.876091	37.36	38.4	32.97	98.7	101.1	100.2	10.22	9.69	10.74	3.02358e+09	2.25814e+09	2.38426e+09	2.91558e+09	2.15917e+09	2.31013e+09	2.87191e+09	2.33044e+09	2.3516e+09	36	36	36
AAH08633.1	actin, beta, partial [OS=Homo sapiens]	0	899.699	81	33	2482	1	368	41	5.83	8490.27	33	Pf00022	60	ACTB	7		Arrhythmogenic Right Ventricular Cardiomyopathy; Pathogenic Escherichia coli infection; Myometrial Relaxation and Contraction Pathways; Focal Adhesion; Fas Ligand (FasL) pathway and Stress induction of Heat Shock Proteins (HSP) regulation; Regulation of Actin Cytoskeleton			6	47	0.996	0.838	0.895	0.921522	0.399797	0.609382	35.7	41.46	40.36	91.8	102.9	105.3	7.89	11.8	2.23	1.10643e+10	1.06993e+10	1.22961e+10	1.0748e+10	1.18723e+10	1.19778e+10	1.26605e+10	1.26898e+10	1.2878e+10	41	46	42
NP_006187.2	Poly(RC)-binding protein 1 [OS=Homo sapiens]	0	208.937	81	16	212	12	356	37.5	7.09	542.21	16	Pf00013, Pf13014	5093	PCBP1	2	ENSG00000169564.6		Spliceosome	mRNA Splicing - Major Pathway	5	4	0.954	1.077	1.082	0.774155	0.99512	0.909101	23.45	23.22	20.94	102.6	106.1	91.3	5.63	5.1	6.76	6.87828e+08	5.54118e+08	5.86899e+08	6.48839e+08	5.41556e+08	5.43432e+08	5.80633e+08	5.04856e+08	5.06155e+08	14	14	14
NP_000215.1	Keratin, type I cytoskeletal 18 [OS=Homo sapiens]	0	857.101	80	49	1493	38	430	48	5.45	4413.87	49	Pf00038	3875	KRT18	12	ENSG00000111057.10	Pathogenic Escherichia coli infection	Pathogenic Escherichia coli infection	Formation of the cornified envelope	5	12	0.943	0.856	0.946	0.714078	0.464684	0.803741	30.96	36.36	28.79	98.6	99.9	101.5	8.71	4.35	3.5	7.58018e+09	7.84853e+09	8.18874e+09	7.73943e+09	7.39258e+09	7.62358e+09	7.71644e+09	8.06027e+09	7.95676e+09	52	53	52
NP_001152759.1	triosephosphate isomerase isoform 2 [OS=Homo sapiens]	0	482.912	80	28	398	28	286	30.8	5.92	1370.74	28	Pf00121	7167	TPI1	12	ENSG00000111669.14	Fatty Acid Beta Oxidation; Cori Cycle; Glycolysis and Gluconeogenesis	Carbon metabolism; Biosynthesis of amino acids; Fructose and mannose metabolism; Metabolic pathways; Glycolysis / Gluconeogenesis; Inositol phosphate metabolism	Gluconeogenesis; Glycolysis	14	0	1.043	1.035	0.978	0.968349	0.955683	0.890443	28.19	27.49	26.22	103.6	98.9	97.5	11.61	11.18	6.54	1.86269e+09	1.3458e+09	1.44694e+09	1.65309e+09	1.21284e+09	1.25915e+09	1.44609e+09	1.24617e+09	1.29891e+09	26	27	26
ACF94484.1	epididymis luminal protein 176 [OS=Homo sapiens]	0	528.047	80	20	1839	1	223	25	5.66	7137.59	20	Pf00022	71	ACTG1	17		Arrhythmogenic Right Ventricular Cardiomyopathy; Pathogenic Escherichia coli infection; Myometrial Relaxation and Contraction Pathways; Focal Adhesion; Fas Ligand (FasL) pathway and Stress induction of Heat Shock Proteins (HSP) regulation; Striated Muscle Contraction; Regulation of Actin Cytoskeleton			7	0	0.949	0.766	0.718	0.895333	0.449294	0.144143	48.94	50.34	36.59	84.3	88.8	126.9	45.21	16.56	34.73	649946	1.40903e+06	934328		961694	803799	781075	1.60646e+06	1.32741e+06	1	1	1
NP_001269836.1	T-complex protein 1 subunit theta isoform 2 [OS=Homo sapiens]	0	342.721	80	36	286	1	529	57.6	5.39	641.62	36	Pf00118	10694	CCT8	21	ENSG00000156261.12				0	0	0.966	1.018	1.054	0.857395	0.923616	0.966546	6.74	4.03	5.86	99	104	97	3.32	9.83	3.05	37280778	31401250	33124485	30154602	31140141	33660805	31753844	31782748	32796543	1	1	1
NP_006576.2	T-complex protein 1 subunit theta isoform 1 [OS=Homo sapiens]	0	354.098	80	38	298	3	548	59.6	5.6	662.64	38	Pf00118	10694	CCT8	21	ENSG00000156261.12			BBSome-mediated cargo-targeting to cilium; Prefoldin mediated transfer of substrate to CCT/TriC; Cooperation of PDCL (PhLP1) and TRiC/CCT in G-protein beta folding; Association of TriC/CCT with target proteins during biosynthesis; Neutrophil degranulation; Folding of actin by CCT/TriC; Formation of tubulin folding intermediates by CCT/TriC	16	34	1.029	1.011	0.961	0.99773	0.91118	0.857012	30.06	28.18	29.46	102.3	100.1	97.7	10.82	1.31	8.05	6.97706e+08	5.1274e+08	5.47181e+08	5.50611e+08	4.73919e+08	4.98e+08	5.79709e+08	4.88287e+08	5.02277e+08	32	35	34
EAW48010.1	ribosomal protein S12, isoform CRA_c [OS=Homo sapiens]	0	128.822	79	10	101	6	73	8.3	8.32	241.05	10	Pf01248	6206	RPS12	6		Cytoplasmic Ribosomal Proteins			1	4	1.008	1.01	0.995	0.966759	0.91118	0.931627	18.5	24.77	19.72	97.9	103.5	98.7	2.45	6.72	9.22	3.04806e+08	2.58427e+08	2.75697e+08	2.71746e+08	2.5811e+08	288339682	3.20134e+08	2.67727e+08	2.67229e+08	8	9	9
CAA67203.1	cytokeratin [OS=Homo sapiens]	0	591.736	79	37	1015	1	279	30.8	5.07	2394.48	37	Pf00038, Pf01576, Pf15003	3856	KRT8	12					0	0	1.071	1.011	0.944	0.985562	0.91118	0.799982	22.1	19.14	37.13	102.7	95.8	101.5	9.89	33.5	20.73	5.96133e+06	5.59381e+06	6.86907e+06	3.24731e+06	4.93338e+06	6.13098e+06	4.37149e+06	5715768	6.49565e+06	1	1	1
BAG59669.1	unnamed protein product [OS=Homo sapiens]	0	274.22	79	26	218	20	449	51.1	8.18	494.95	26	Pf00996	2665	GDI2	10					0	6	1.008	0.945	0.922	0.966759	0.775855	0.719275	22.34	22.12	22.81	98	102.1	99.9	0.83	4.12	4.69	3.09872e+08	2.72987e+08	2.99157e+08	3.10515e+08	2.51914e+08	2.84179e+08	2.9336e+08	2.87418e+08	3.09176e+08	25	25	25
NP_002128.1	heterogeneous nuclear ribonucleoproteins A2/B1 isoform A2 [OS=Homo sapiens]	0	464.316	79	31	362	1	341	36	8.65	905.45	31	Pf00076, Pf13893, Pf14259	3181	HNRNPA2B1	7	ENSG00000122566.20	mRNA Processing			1	0	0.662	1.581	2.239	0.0393974	0.138717	3.28165e-08	39.93	39.66	43.46	101	137.6	61.4	30.84	33.88	25.7	3.58862e+06	5.98975e+06	5.3431e+06	5.09553e+06	8895457	6.68572e+06	2.36563e+06	3.08889e+06	3.88652e+06	1	1	1
CAA25833.1	glyceraldehyde-3-phosphate dehydrogenase [OS=Homo sapiens]	0	778.895	79	35	1536	4	335	36	8.21	5174.9	35	Pf00044, Pf02800	2597	GAPDH	12					0	39	1.04	1.04	0.976	0.979214	0.966722	0.887775	33.18	41.44	29.83	98.4	97.9	103.7	7.04	2.06	3.51	4.38348e+09	3.35972e+09	3.74312e+09	3.59353e+09	3.23398e+09	3.47215e+09	3.92278e+09	3.58565e+09	3.72043e+09	41	42	41
BAD96744.1	tubulin alpha 6 variant, partial [OS=Homo sapiens]	0	467.401	78	31	706	5	449	49.8	5.14	2038.87	31	Pf00091, Pf03953	84790	TUBA1C	12		Pathogenic Escherichia coli infection; Parkin-Ubiquitin Proteasomal System pathway			2	0	0.982	0.92	0.955	0.881607	0.704199	0.835089	25.14	30.83	25.07	101.1	97.2	101.7	4.9	13.09	17.4	9.50008e+07	8.51997e+07	9.91184e+07	8.81816e+07	7.46739e+07	9.99359e+07	6.79373e+07	8.85833e+07	9.31007e+07	5	5	4
AAB19349.2	S3 ribosomal protein [OS=Homo sapiens]	0	204.156	78	23	264	23	243	26.7	9.69	584.09	23	Pf00189, Pf07650	6188	RPS3	11		Cytoplasmic Ribosomal Proteins			1	0	1.029	1.107	1.099	0.99773	0.960997	0.883272	23.14	27.12	24.42	103.1	102.2	94.7	6.39	3.72	5.71	4.73749e+08	3.9158e+08	4.83472e+08	4.41732e+08	3.69105e+08	4.20183e+08	4.38691e+08	3.92433e+08	3.85207e+08	20	20	21
NP_705935.1	tropomyosin alpha-3 chain isoform Tpm3.1cy [OS=Homo sapiens]	0	318.324	78	24	251	5	248	29	4.78	662.27	24	Pf00261, Pf12718	7170	TPM3	1	ENSG00000143549.19	Striated Muscle Contraction			1	11	1.088	1.1	1.006	0.839068	0.968415	0.954188	29.95	44.08	28	98.9	96.3	104.8	6.74	10.2	5.51	2.8186e+08	2.46265e+08	2.37629e+08	2.17639e+08	2.26317e+08	2.44624e+08	2.63844e+08	2.69384e+08	2.86109e+08	15	15	15
AAA36044.1	40 kDa keratin protein, partial [OS=Homo sapiens]	0	348.924	78	33	551	1	400	44.1	5.14	1188.32	33	Pf00038	3880	KRT19	17					0	0	0.703	0.846	1.204	0.514862	0.678643	0.879851	0	45.67	45.67	83.2	118.4	98.3			41.63			666178		823301		563407		1.00543e+06			1
NP_002267.2	Keratin, type I cytoskeletal 19 [OS=Homo sapiens]	0	405.447	78	34	610	2	400	44.1	5.14	1422.37	34	Pf00038	3880	KRT19	17	ENSG00000171345.13			Formation of the cornified envelope	3	33	0.961	0.945	0.977	0.814699	0.775239	0.890099	27.6	38.71	26.69	99.2	100.1	100.8	9.23	5.79	7.69	2.5925e+09	2.70909e+09	2.83326e+09	2.60267e+09	2.55497e+09	2.62679e+09	2.56814e+09	2.93653e+09	2.71581e+09	34	34	33
BAG64624.1	unnamed protein product [OS=Homo sapiens]	0	112.08	78	10	101	2	112	12.5	6.6	317.78	10	Pf00241	1072	CFL1	11		Brain-Derived Neurotrophic Factor (BDNF) signaling pathway; VEGFA-VEGFR2 Signaling Pathway; EGF/EGFR Signaling Pathway; Regulation of Actin Cytoskeleton; G13 Signaling Pathway			5	0	0.782	0.736	0.979	0.0477211	0.11838	0.893698	31.7	36.72	34.05	77.8	99.1	123.1	28.28	17.57	4.95	6.90258e+07	3.90871e+07	4.0288e+07	53649661	5.83656e+07	43866288	6.52502e+07	5.88104e+07	6.38713e+07	2	2	2
NP_002005.1	Peptidyl-prolyl cis-trans isomerase FKBP4 [OS=Homo sapiens]	0	348.358	78	31	251	31	459	51.8	5.43	548.86	31	Pf00254, Pf00515, Pf07719, Pf13174, Pf13371, Pf13414, Pf13424, Pf13432, Pf14559	2288	FKBP4	12	ENSG00000004478.7	Androgen receptor signaling pathway	Estrogen signaling pathway	Attenuation phase; HSP90 chaperone cycle for steroid hormone receptors (SHR)	8	0	1.075	0.961	0.925	0.874115	0.804553	0.727423	31.65	33.37	31.18	99.8	94.4	105.8	10.75	6.87	7.9	3.83464e+08	2.90637e+08	2.95985e+08	3.14922e+08	2.40653e+08	2.74591e+08	3.50124e+08	3.18271e+08	2.90726e+08	28	27	28
AAQ24860.1	Nucleophosmin [OS=Homo sapiens]	0	414.132	78	19	512	19	294	32.6	4.82	1743.31	19	Pf03066	4869	NPM1	5					0	0	0.896	1.082	1.111	0.412969	0.988004	0.851476	48.73	57.4	71	98.6	103.7	97.7	12.76	4.1	7.45	1.00755e+09	7.44444e+08	7.48488e+08	8.75522e+08	7.39637e+08	7.48104e+08	8.44519e+08	7.13756e+08	7.56546e+08	21	20	18
NP_003365.1	voltage-dependent anion-selective channel protein 1 [OS=Homo sapiens]	0	163.084	77	17	133	16	283	30.8	8.54	289.33	17	Pf01459	7416	VDAC1	5	ENSG00000213585.10		Calcium signaling pathway; Huntington's disease; Parkinson's disease; NOD-like receptor signaling pathway; Influenza A; HTLV-I infection; cGMP-PKG signaling pathway	Mitochondrial calcium ion transport; Ub-specific processing proteases; Mitochondrial protein import; Pink/Parkin Mediated Mitophagy	16	1	0.896	0.831	0.941	0.413285	0.374726	0.793022	37.53	31.14	36.47	88.9	94	117.1	12.25	20.54	8.69	2.38106e+08	1.73353e+08	1.80576e+08	2.76851e+08	1.73021e+08	1.82933e+08	240698242	240843150	2.02978e+08	16	16	15
EAW96654.1	keratin 8, isoform CRA_d [OS=Homo sapiens]	0	978.553	77	64	2338	2	561	62.1	5.97	6070.48	64	Pf00038, Pf01576, Pf05957, Pf06637, Pf12128, Pf13166, Pf13514, Pf15003	3856	KRT8	12					0	75	0.965	0.841	0.908	0.831454	0.41051	0.670843	43.04	46.99	42.4	90.5	102.9	106.6	11.48	8.92	3.2	9.84678e+09	1.05148e+10	1.15443e+10	1.10694e+10	1.1296e+10	1.21133e+10	1.24349e+10	1.29525e+10	1.27059e+10	70	72	71
AAN85571.1	Class II beta tubulin isotype [OS=Homo sapiens]	0	699.485	77	37	959	8	445	49.9	4.92	2745.18	37	Pf00091, Pf03953, Pf10644	7280	TUBB2A	6		Pathogenic Escherichia coli infection; Parkin-Ubiquitin Proteasomal System pathway			2	1	1.016	1.001	1.025	0.986795	0.895456	0.989089	27.64	38.39	26.54	90.1	101.3	108.5	25.71	19.22	16.7	131977430	1.81971e+08	2.09612e+08	1.63195e+08	1.93238e+08	2.22744e+08	1.75605e+08	2.26438e+08	2.37017e+08	9	9	9
NP_006078.2	tubulin beta-4A chain isoform 3 [OS=Homo sapiens]	0	557.429	77	30	828	2	444	49.6	4.88	2140.86	30	Pf00091, Pf03953, Pf10644	10382	TUBB4A	19	ENSG00000104833.11	Pathogenic Escherichia coli infection; Parkin-Ubiquitin Proteasomal System pathway	Pathogenic Escherichia coli infection; Phagosome; Gap junction	COPI-independent Golgi-to-ER retrograde traffic; COPI-dependent Golgi-to-ER retrograde traffic; Carboxyterminal post-translational modifications of tubulin; Regulation of PLK1 Activity at G2/M Transition; Recruitment of NuMA to mitotic centrosomes; Hedgehog 'off' state; Loss of Nlp from mitotic centrosomes; Translocation of GLUT4 to the plasma membrane; Prefoldin mediated transfer of substrate to…	72	1	1.035	0.605	0.267	0.997098	0.00536768	1.7785e-16	47.3	96.28	142.39	13.2	15.4	271.4	45.4	105.41	12.36	2.76905e+06	1.23773e+06	3.64834e+06	7233110	2.67862e+06	18601.4	4.55751e+07	5.72949e+07	5.11402e+07	3	2	3
AAH28356.1	Keratin 23 (histone deacetylase inducible) [OS=Homo sapiens]	0	367.824	76	33	352	33	422	48.1	6.54	713.91	33	Pf00038	25984	KRT23	17					0	0	1.058	1.002	0.99	0.917914	0.898925	0.9192	23.54	31.34	29.92	106.5	99.5	94	2.13	2.25	5.9	6.02088e+08	5.46776e+08	5.75258e+08	5.19578e+08	4.76628e+08	4.93702e+08	4.66981e+08	4.82604e+08	5.1101e+08	32	32	30
NP_112533.1	Heterogeneous nuclear ribonucleoproteins A2/B1 isoform B1 [OS=Homo sapiens]	0	463.726	76	31	367	1	353	37.4	8.95	905.56	31	Pf00076, Pf13893, Pf14259	3181	HNRNPA2B1	7	ENSG00000122566.20	mRNA Processing		Gene and protein expression by JAK-STAT signaling after Interleukin-12 stimulation; Interleukin-12 family signaling; mRNA Splicing - Major Pathway	10	31	1.085	1.127	0.981	0.85225	0.925348	0.897247	39.57	39.51	50.25	111.1	93.8	95.1	8.2	10.94	1.41	1.27858e+09	9.75612e+08	1.05212e+09	1.05713e+09	7.65363e+08	8.22491e+08	8.63788e+08	8.6319e+08	8.63682e+08	31	29	28
AAH24689.1	Similar to Elongation factor 2b, partial [OS=Homo sapiens]	0	480.396	76	38	584	21	517	57.5	6.93	1696.71	38	Pf00679, Pf03144, Pf03764, Pf14492	1938	EEF2	19		Translation Factors; AMP-activated Protein Kinase (AMPK) Signaling; Brain-Derived Neurotrophic Factor (BDNF) signaling pathway			3	17	1.009	0.998	0.973	0.966871	0.890905	0.883272	25.88	32.17	21.84	102.5	101.3	96.1	2.96	0.73	7.4	1.66149e+09	1.37036e+09	1.51364e+09	1.4659e+09	1.29933e+09	1.37896e+09	1.3967e+09	1.19239e+09	1.3382e+09	37	36	36
CAA57764.1	TSA, partial [OS=Homo sapiens]	0	145.267	75	13	113	1	164	18.3	5.38	321.71	13	Pf00578, Pf08534, Pf10417	7001	PRDX2	19		Selenium Micronutrient Network			1	0	1.041	0.988	0.949	0.997968	0.872431	0.816087	8.31	10.3	11.02	100.9	96.9	102.1	13.07	12.28	17.39	8191615	5.60451e+06	6.45714e+06	7.36369e+06	5386075	5450368	8161287	5.82192e+06	6.16343e+06	1	1	1
BAF84204.1	unnamed protein product [OS=Homo sapiens]	0	86.858	75	8	63	8	164	17.8	6.57	168.66	8	Pf00692	1854	DUT	15					0	0	1.213	1.492	1.193	0.230942	0.185466	0.602189	29.22	23.16	20.01	127.6	94.3	78	10.72	3.62	7.82	1.37425e+08	1.20756e+08	1.08027e+08	9.55002e+07	86284177	8.48851e+07	6.97056e+07	7.57883e+07	79239831	7	7	7
AAI07895.1	NME1-NME2 protein [OS=Homo sapiens]	0	226.272	75	17	207	9	292	32.6	8.48	435.86	17	Pf00334	654364	NME1-NME2	17	ENSG00000011052.21				0	9	1.105	1.187	1.051	0.769519	0.823082	0.973612	31.51	30.81	19.24	105.2	100.7	94.2	7.07	4.12	1.24	1.17701e+09	9.02441e+08	1003128310	1.00073e+09	8.09311e+08	8.81704e+08	8.70611e+08	8.38984e+08	8.53347e+08	18	17	17
EAW98602.1	phosphoglycerate kinase 1, isoform CRA_a [OS=Homo sapiens]	0	295.262	75	21	259	3	262	28.4	9.13	790.02	21	Pf00162	5230	PGK1	X		Photodynamic therapy-induced HIF-1 survival signaling; Glycolysis and Gluconeogenesis			2	0	0.927	1.032	1.075	0.622145	0.951643	0.924192	15.02	17.4	16.08	99.1	104.2	96.7	4.02	2.96	4.88	1.17524e+08	1.07155e+08	1.07554e+08	1.18903e+08	1.0193e+08	1.0398e+08	105965074	9.51292e+07	1.02682e+08	3	3	3
BAH13545.1	unnamed protein product [OS=Homo sapiens]	0	404.138	74	26	333	8	389	41.4	7.33	1078.41	26	Pf00162	5230	PGK1	X		Cori Cycle; Photodynamic therapy-induced HIF-1 survival signaling; Glycolysis and Gluconeogenesis			3	19	0.996	0.991	1.018	0.922932	0.882075	0.978074	27.6	26.45	22.69	102.1	96.8	101.2	4	9.86	3.18	1.10118e+09	9.04614e+08	9.70593e+08	1.09029e+09	8.10176e+08	8.55675e+08	9.90667e+08	9.26474e+08	9.07659e+08	26	26	27
NP_002565.1	peroxiredoxin-1 [OS=Homo sapiens]	0	332.26	73	24	351	21	199	22.1	8.13	883.17	24	Pf00578, Pf08534, Pf10417	5052	PRDX1	1	ENSG00000117450.13	Androgen receptor signaling pathway; Selenium Micronutrient Network; NRF2 pathway	Peroxisome	TP53 Regulates Metabolic Genes; Deregulated CDK5 triggers multiple neurodegenerative pathways in Alzheimer's disease models; Detoxification of Reactive Oxygen Species	15	3	1.078	0.995	0.944	0.869879	0.890519	0.799982	26.94	27.73	21.07	94.9	101.1	104	3.27	3.46	1.79	1.17532e+09	9.63979e+08	1.06521e+09	1.12338e+09	9.2759e+08	1.04253e+09	1.13186e+09	1.14309e+09	1.09952e+09	22	23	22
CAG38740.1	PCNA [OS=Homo sapiens]	0	174.357	73	16	181	1	261	28.7	4.64	618.89	16	Pf00705, Pf02747	5111	PCNA	20		Cell Cycle; Retinoblastoma (RB) in Cancer; EGF/EGFR Signaling Pathway; G1 to S cell cycle control; DNA Replication; Senescence and Autophagy in Cancer			6	0	0.572	0.896	1.325	2.68082e-05	0.618682	0.205641	12.99	19.1	34.99	76.1	139	84.9	6.31	20.03	24.53	9656068	8757718	10358859	12148388	15732893	15986681	8977097	10098956	13862127	1	1	1
NP_002119.1	High mobility group protein B1 [OS=Homo sapiens]	0	298.849	73	22	348	17	215	24.9	5.74	894.82	22	Pf00505, Pf09011	3146	HMGB1	13	ENSG00000189403.14	Retinoblastoma (RB) in Cancer; DNA Damage Response (only ATM dependent)	Base excision repair	TRAF6 mediated NF-kB activation; Advanced glycosylation endproduct receptor signaling; TAK1 activates NFkB by phosphorylation and activation of IKKs complex; RIP-mediated NFkB activation via ZBP1; Activated TLR4 signalling; Interleukin-1 family signaling; Neutrophil degranulation; Regulation of TLR by endogenous ligand; DEx/H-box helicases activate type I IFN and inflammatory cytokines production…	40	5	1.04	1.087	1.008	0.980377	0.981982	0.959654	21.48	32.27	30.35	100.1	99.5	100.4	5.58	3.02	2.11	1.38367e+09	1.13534e+09	1.17578e+09	1.21585e+09	1.10547e+09	1.10117e+09	1.20033e+09	1.15037e+09	1.19115e+09	22	22	19
BAA25844.1	ribosomal protein L38, partial [OS=Homo sapiens]	0	46.314	73	4	56	4	37	4.3	9.72	72.92	4	Pf01781	6169	RPL38	17		Cytoplasmic Ribosomal Proteins			1	0	0.904	1.038	1.15	0.525567	0.960997	0.730554	16.37	14.14	13.66	95.4	106.4	98.3	5.94	9.86	0.45	6.29038e+07	5.24623e+07	5.304e+07	6.30122e+07	6.34643e+07	5.56963e+07	5.69267e+07	5.58491e+07	5.58402e+07	4	4	4
NP_057701.1	ubiquitin-fold modifier 1 isoform 1 precursor [OS=Homo sapiens]	0	32.325	73	3	14	3	85	9.1	9.31	70.49	3	Pf03671	51569	UFM1	13	ENSG00000120686.11				0	0	1.073	0.728	0.676	0.978587	0.121977	0.00723194	36.22	29.14	17.98	69.2	152.4	78.4	47.31	50.46	20.1	4.19403e+06	2.38094e+06	6.70598e+06	9.59216e+06	7.61917e+06	2.77541e+06	4.77429e+06	3.1215e+06	4.25351e+06	2	2	3
BAF83004.1	unnamed protein product [OS=Homo sapiens]	0	162.79	73	12	167	1	135	15.9	5.11	550.77	12	Pf00061	5947	RBP1	3		Retinoblastoma (RB) in Cancer; Vitamin A and Carotenoid Metabolism			2	0	0.357	0.195	0.544	0.018855	1.43492e-06	0.0187811	49.4	36.75	55.4	33.6	93.9	172.5	40.12	57.61	24.77	153562		81352.4	465124	171786			445645	630260	1		1
NP_066972.1	coactosin-like protein [OS=Homo sapiens]	0	76.614	73	9	40	9	142	15.9	5.67	63.04	9	Pf00241, Pf01453	23406	COTL1	16	ENSG00000103187.7			Neutrophil degranulation	3	0	0.961	0.92	1.011	0.814728	0.703331	0.966984	45	44.2	37.34	43.4	108.6	148	16.5	60.17	24.71	1.01757e+08	1.13658e+08	1.3453e+08	9.60877e+07	2.6894e+08	3.9199e+08	5.33581e+08	4.00977e+08	3.17085e+08	6	8	8
BAG52542.1	unnamed protein product [OS=Homo sapiens]	0	787.895	73	46	882	2	531	58.1	7.71	2818.94	46	Pf00224, Pf02887	5315	PKM	15		Photodynamic therapy-induced HIF-1 survival signaling; Glycolysis and Gluconeogenesis			2	0	1.008	0.93	0.883	0.966759	0.735647	0.554723	21.51	22.85	12.98	70.3	110	119.7	22.49	40.78	39.82	5726582	3.40287e+06	3.81506e+06	6.24018e+06	2290256	5.48016e+06	2.95677e+06	6.84992e+06	6125217	2	2	1
NP_115914.1	tubulin beta-6 chain isoform 1 [OS=Homo sapiens]	0	265.92	72	23	378	11	446	49.8	4.88	796.34	23	Pf00091, Pf03953, Pf10644	84617	TUBB6	18	ENSG00000176014.12	Pathogenic Escherichia coli infection; Parkin-Ubiquitin Proteasomal System pathway	Gap junction; Phagosome; Pathogenic Escherichia coli infection	COPI-independent Golgi-to-ER retrograde traffic; COPI-dependent Golgi-to-ER retrograde traffic; Carboxyterminal post-translational modifications of tubulin; Recruitment of NuMA to mitotic centrosomes; Hedgehog 'off' state; Translocation of GLUT4 to the plasma membrane; Prefoldin mediated transfer of substrate to CCT/TriC; Microtubule-dependent trafficking of connexons from Golgi to the plasma mem…	65	0	1.279	1.321	1.061	0.0581581	0.517679	0.949213	33.63	46.26	31.18	188	58.1	53.9	2.5	7.92	8.69	1.69599e+08	1.41279e+08	1.59767e+08	4.62928e+07	4.73876e+07	4.53307e+07	4.32205e+07	4.96556e+07	4.31863e+07	9	9	9
CAG46598.1	PCNA, partial [OS=Homo sapiens]	0	195.105	72	17	182	2	261	28.7	4.69	623.67	17	Pf00705, Pf02747	5111	PCNA	20		Cell Cycle; Retinoblastoma (RB) in Cancer; EGF/EGFR Signaling Pathway; G1 to S cell cycle control; DNA Replication; Senescence and Autophagy in Cancer			6	15	1.009	1.104	1.169	0.967343	0.966923	0.682542	30.09	22.9	28.26	100	104	96.1	2.17	7.07	5.32	3.79756e+08	3.45096e+08	3.73424e+08	4.26686e+08	3.27891e+08	3.56635e+08	3.27979e+08	3.40886e+08	3.54954e+08	16	16	15
AAH14920.1	Unknown (protein for IMAGE:3906970), partial [OS=Homo sapiens]	0	144.371	72	10	108	4	191	21.1	5.83	294.81	10	Pf00011	3315	HSPB1	7		Apoptosis-related network due to altered Notch3 in ovarian cancer; Fas Ligand (FasL) pathway and Stress induction of Heat Shock Proteins (HSP) regulation; MAPK Signaling Pathway; VEGFA-VEGFR2 Signaling Pathway; p38 MAPK Signaling Pathway			5	6	1.271	1.04	0.865	0.0705301	0.96669	0.471695	30.01	32.3	37.69	117.2	89.4	93.4	5.22	6.61	4.65	4.40262e+08	4.16616e+08	4.61875e+08	3.42169e+08	3.29357e+08	3.07166e+08	3.43358e+08	3.42999e+08	3.6459e+08	9	9	10
AAH68456.2	tyrosine 3-monooxygenase/tryptophan 5-monooxygenase activation protein, zeta polypeptide [OS=Homo sapiens]	0	227.751	72	19	363	1	245	27.7	4.79	587.27	19	Pf00244	7534	YWHAZ	8		Cell Cycle; Prolactin Signaling Pathway; Pathogenic Escherichia coli infection; Myometrial Relaxation and Contraction Pathways; Calcium Regulation in the Cardiac Cell; Sudden Infant Death Syndrome (SIDS) Susceptibility Pathways			6	0	1.03	1.199	1.164	0.99773	0.801912	0.698504	9.1	8.7	9.7	106.9	103.9	89.2	3.95	10.95	10.15	215402736	202706960	208223760	200297120	187159232	159183056	178315456	165071296	141851792	1	1	1
NP_000792.1	peptidyl-prolyl cis-trans isomerase FKBP1A isoform a [OS=Homo sapiens]	0	30.413	72	4	28	4	108	11.9	8.16	67.69	4	Pf00254	2280	FKBP1A	20	ENSG00000088832.16	Target Of Rapamycin (TOR) Signaling; Spinal Cord Injury; Calcium Regulation in the Cardiac Cell; TGF-beta Receptor Signaling		TGFBR2 Kinase Domain Mutants in Cancer; TGFBR1 LBD Mutants in Cancer; TGF-beta receptor signaling activates SMADs; TGF-beta receptor signaling in EMT (epithelial to mesenchymal transition); Calcineurin activates NFAT; TGFBR1 KD Mutants in Cancer	22	0	1.226	1.222	1.032	0.422184	0.761092	0.999922	28.44	28.87	29.4	107.6	95	97.4	17.13	26.01	9.83	5.89621e+07	4.18366e+07	40079358	5.53224e+07	2.95207e+07	36910628	4.39771e+07	3.53912e+07	3.88718e+07	3	3	4
CAA30894.1	glutathione S-transferase [OS=Homo sapiens]	0	240.549	72	14	236	14	210	23.4	5.64	902.12	14	Pf00043, Pf02798, Pf14497	2950	GSTP1	11		Photodynamic therapy-induced NFE2L2 (NRF2) survival signaling; Exercise-induced Circadian Regulation; Arachidonate Epoxygenase / Epoxide Hydrolase			3	0	1.049	0.993	0.934	0.952688	0.884429	0.763938	35.34	36.04	29.33	101.1	94.6	104.3	17.23	18.01	12.3	5.70906e+08	3.63252e+08	4.2274e+08	5.10114e+08	3.22576e+08	3.63202e+08	5.03476e+08	4.14584e+08	3.89036e+08	14	13	13
NP_002147.2	60 kDa heat shock protein, mitochondrial [OS=Homo sapiens]	0	785.768	71	46	1087	46	573	61	5.87	3517.61	46	Pf00118	3329	HSPD1	2	ENSG00000144381.16	Apoptosis-related network due to altered Notch3 in ovarian cancer; Sudden Infant Death Syndrome (SIDS) Susceptibility Pathways	Tuberculosis; Legionellosis; Type I diabetes mellitus; RNA degradation	TFAP2A acts as a transcriptional repressor during retinoic acid induced cell differentiation; Mitochondrial protein import; Metabolism of proteins	13	0	0.941	1.016	1.106	0.706025	0.918221	0.865051	40.02	36.41	35.17	81.6	96.4	122	6.04	7.46	5.16	1.94818e+09	1.53226e+09	1.6714e+09	1.89642e+09	1.71528e+09	2.02267e+09	2.52239e+09	2.37601e+09	2.21375e+09	46	48	48
CAG29335.1	RPLP1, partial [OS=Homo sapiens]	0	88.24	71	4	60	2	114	11.5	4.32	272.98	4	Pf00428	6176	RPLP1	15		Cytoplasmic Ribosomal Proteins			1	2	0.791	0.469	0.733	0.0868765	1.01066e-05	0.0432009	61.76	71.71	34.7	72.4	89.7	137.8	10.46	12.3	27.24	3.10326e+07	2.72692e+07	3.52588e+07	3.63737e+07	2.90086e+07	3.90612e+07	5.47136e+07	5.08012e+07	8.07249e+07	3	3	3
CAG47005.1	RpLP1 [OS=Homo sapiens]	0	75.678	71	4	47	2	114	11.6	4.37	190.8	4	Pf00428	6176	RPLP1	15		Cytoplasmic Ribosomal Proteins			1	0	1.36	2.184	1.491	0.404256	0.000905945	0.0576011	15.98	3.22	27.55	125.9	129.8	44.3	23.51	61.49	10.47	7.20944e+06		4.89377e+06	3.12917e+06	5.18287e+06	1.05195e+07		2.08336e+06	1.78309e+06	2		1
NP_006820.1	Adipogenesis regulatory factor [OS=Homo sapiens]	0	43.873	71	3	16	3	76	7.9	5.31	69.25	3		10974	ADIRF; C10orf116	10	ENSG00000148671.13			Transcriptional regulation of white adipocyte differentiation	2	0	1.166	0.677	0.595	0.686354	0.040217	0.000191591	49.77	57.21	66.04	76.5	92.3	131.2	28.74	2.16	32.02	3.11098e+07	4.52119e+07	3.22783e+07	3.83034e+07	3.3844e+07	3.69888e+07	65721208	3.27744e+07	5.2232e+07	3	2	3
NP_001869.1	Cellular retinoic acid-binding protein 2 [OS=Homo sapiens]	0	76.949	71	9	93	9	138	15.7	5.4	210.89	9	Pf00061, Pf14651	1382	CRABP2	1	ENSG00000143320.8	Vitamin A and Carotenoid Metabolism		Signaling by Retinoic Acid	4	0	0.938	1.042	1.052	0.717199	0.967394	0.971637	32.79	25.85	36.53	105.7	89.1	105.2	10.24	24.4	15.42	9.26916e+07	6.82046e+07	7.39138e+07	9.2338e+07	5.43389e+07	5.73483e+07	9.01839e+07	7.01751e+07	6.63847e+07	9	9	9
EAW91769.1	ribosomal protein L30, isoform CRA_a, partial [OS=Homo sapiens]	0	93.435	71	6	89	6	86	9.6	9.42	266.02	6	Pf01248	6156	RPL30	8		Selenium Metabolism and Selenoproteins; Cytoplasmic Ribosomal Proteins			2	0	0.962	0.944	1.024	0.818333	0.773788	0.987228	14.07	15.39	11.97	103.3	100.2	96.6	9.37	4.81	9.64	2.9562e+08	2.28864e+08	2.33971e+08	2.58406e+08	2.09698e+08	2.19881e+08	2.56922e+08	2.09321e+08	2.19514e+08	6	6	6
NP_000091.1	Cystatin-B [OS=Homo sapiens]	0	46.139	70	4	16	4	98	11.1	7.56	38.38	4	Pf00031	1476	CSTB	21	ENSG00000160213.6			Neutrophil degranulation	3	0	1.274	1.41	1.117	0.324642	0.319162	0.834514	20.71	54.98	46.7	128.9	98.3	72.8	34.4	13.65	53.46	1.95387e+07	3.46066e+07	3.59488e+07	3.38264e+07	2.38067e+07	2.47742e+07	2.90318e+07	8449002	1.91489e+07	4	4	4
NP_006139.1	LIM and SH3 domain protein 1 isoform a [OS=Homo sapiens]	0	180.748	70	18	167	17	261	29.7	7.05	337.68	18	Pf00018, Pf00412, Pf00880, Pf07653, Pf14604	3927	LASP1	17	ENSG00000002834.17				0	1	1.135	1.117	1.021	0.627914	0.945432	0.981762	26.4	37.65	25.49	104	99.8	96.2	8.67	10.66	5.04	5.37966e+08	5.54627e+08	5.85838e+08	4.79501e+08	5.20013e+08	5.15946e+08	5.40186e+08	5.14748e+08	4.76096e+08	18	18	17
AAB23031.1	protein disulphide isomerase, PDI {N-terminal} [OS=Homo sapiens]	0	24.398	70	2	27	2	20	2.3	4.44	46.42	2									0	0	1.037	1.018	0.999	0.998727	0.924748	0.938691	13.33	7.4	9.43	105.1	96.4	98.5	5.86	6.84	4.49	3.67703e+07	3.24555e+07	3.16762e+07	3.17264e+07	3.10587e+07	2.9072e+07	3.32633e+07	3.1086e+07	2.95862e+07	2	2	2
CAA33803.1	unnamed protein product [OS=Homo sapiens]	0	911.603	70	69	844	41	892	102.9	5.38	2355.61	69	Pf00036, Pf00307, Pf00435, Pf08726, Pf11971, Pf13405, Pf13499	87	ACTN1	14		Arrhythmogenic Right Ventricular Cardiomyopathy; Focal Adhesion; Regulation of Actin Cytoskeleton			3	1	1.036	0.889	0.847	0.986795	0.590745	0.380121	27.58	32.99	24.88	98.8	89.6	111.6	6.37	15.69	8.65	9.61706e+08	9.13061e+08	1.03627e+09	7.42001e+08	7.82372e+08	9.45351e+08	9.42908e+08	1.08706e+09	1.05869e+09	39	37	38
EAW70525.1	5-aminoimidazole-4-carboxamide ribonucleotide formyltransferase/IMP cyclohydrolase, isoform CRA_c [OS=Homo sapiens]	0	332.786	70	32	263	32	592	64.6	6.71	843.77	32	Pf01808, Pf02142	471	ATIC	2		One Carbon Metabolism			1	0	0.997	0.972	0.987	0.928032	0.833767	0.912404	25.64	33.52	29.81	99.8	100.2	100	5.97	5.94	2.36	3.33346e+08	2.60406e+08	2.89508e+08	3.17508e+08	2.5087e+08	2.67004e+08	2.90031e+08	2.71365e+08	2.73765e+08	29	32	31
NP_003286.1	translationally-controlled tumor protein isoform 2 [OS=Homo sapiens]	0	120.017	69	11	136	11	172	19.6	4.93	558.9	11	Pf00838	7178	TPT1	13	ENSG00000133112.16				0	0	0.994	0.862	0.909	0.915175	0.48726	0.673234	47.6	39.28	45.67	87.9	98	114.1	13.75	7.56	19.86	3.10818e+08	2.09338e+08	2.44168e+08	2.698e+08	2.25876e+08	2.76486e+08	4.21673e+08	3.01359e+08	2.92042e+08	10	11	11
NP_004628.4	ras-related protein Rab-7a [OS=Homo sapiens]	0	76.667	69	13	111	13	207	23.5	6.7	255.24	13	Pf00025, Pf00071, Pf01926, Pf04670, Pf07728, Pf08477	7879	RAB7A	3	ENSG00000075785.12		Salmonella infection; Amoebiasis; Phagosome; Endocytosis; Tuberculosis	TBC/RABGAPs; Neutrophil degranulation; MHC class II antigen presentation; RAB GEFs exchange GTP for GDP on RABs; RAB geranylgeranylation	18	0	0.805	0.925	1.146	0.0262208	0.717927	0.745955	18.34	26.62	18.65	90.8	113.7	95.6	4.32	1.73	6.91	1.83784e+08	1.47483e+08	1.64886e+08	2.09816e+08	1.78105e+08	1.89676e+08	1.65771e+08	1.83996e+08	1.63729e+08	11	11	11
AAH11365.1	glyoxalase I [OS=Homo sapiens]	0	50.53	69	8	32	1	184	20.8	5.31	47.63	8	Pf00903, Pf12681, Pf13669	2739	GLO1	6					0	7	1.033	0.978	0.964	0.997968	0.844928	0.865051	17.37	20.24	13	101	100.4	98.6	1.9	6.69	2.91	6.2192e+07	5.23667e+07	5.74469e+07	5.85309e+07	4.50418e+07	5.24981e+07	5.27841e+07	5.48343e+07	5.29086e+07	7	7	7
NP_006699.2	lactoylglutathione lyase [OS=Homo sapiens]	0	66.91	69	8	34	1	184	20.8	5.31	56.31	8	Pf00903, Pf12681, Pf13669	2739	GLO1	6	ENSG00000124767.6		Pyruvate metabolism	Pyruvate metabolism	5	0	0.623	1.017	1.433	0.501324	0.91118	0.602392	97.15	27.61	97.15	80.6	129.2	90.2	30.2	95.26	16.47	152043	218230	146232	232325	608252	74289.7	190690	155600	133847	1	1	1
AAH01550.1	SFN protein [OS=Homo sapiens]	0	125.012	69	14	111	11	216	24.3	4.82	155.11	14	Pf00244	2810	SFN	1		Myometrial Relaxation and Contraction Pathways; Calcium Regulation in the Cardiac Cell			2	0	1.026	0.926	0.947	0.998884	0.720306	0.807792	57.64	64.56	62.86	98.3	100	101.7	34.35	36.52	42.99	3.14086e+08	1.57204e+08	1.7141e+08	2.93568e+08	1.51582e+08	1.43253e+08	3.39123e+08	1.68596e+08	1.64161e+08	11	10	11
NP_006800.2	Mitochondrial import receptor subunit TOM34 [OS=Homo sapiens]	0	91.662	69	15	54	15	309	34.5	8.98	116.48	15	Pf00515, Pf07719, Pf12895, Pf13414	10953	TOMM34	20	ENSG00000025772.7				0	0	0.996	0.96	0.985	0.924214	0.801912	0.907607	42.4	52.7	35.44	103	103.9	93.2	16.86	6.88	14.95	7.39363e+07	4.73096e+07	5.51151e+07	5.50499e+07	4.33909e+07	5.23591e+07	6.17204e+07	4.68976e+07	4.70293e+07	13	13	14
NP_002464.1	Myosin-9 [OS=Homo sapiens]	0	1902.12	69	149	1433	129	1960	226.4	5.6	4002.02	149	Pf00063, Pf01442, Pf01496, Pf01576, Pf01765, Pf02736, Pf03962, Pf04111, Pf04156, Pf05911, Pf06637, Pf07888, Pf09731, Pf11068, Pf11559, Pf12128, Pf13094	4627	MYH9	22	ENSG00000100345.20	Primary Focal Segmental Glomerulosclerosis FSGS; VEGFA-VEGFR2 Signaling Pathway	Salmonella infection; Tight junction; Regulation of actin cytoskeleton	RHO GTPases activate PAKs; EPHA-mediated growth cone collapse; RHO GTPases Activate ROCKs; Sema4D induced cell migration and growth-cone collapse; Regulation of actin dynamics for phagocytic cup formation; RHO GTPases activate CIT; RHO GTPases activate PKNs	23	22	1.047	0.965	0.925	0.957575	0.815128	0.727423	28.25	31.22	29.79	102.8	98.9	98.4	6.76	8.75	5.02	2.17084e+09	2.16305e+09	2.2732e+09	1.95005e+09	2.03844e+09	2.00916e+09	1.99856e+09	2.16573e+09	2.05262e+09	142	138	143
AAX07827.1	Cell proliferation-inducing protein 40 [OS=Homo sapiens]	0	158.261	69	27	160	27	501	57.1	6.6	270.04	27	Pf00152, Pf01336	1615	DARS	2		Alanine and aspartate metabolism			1	0	1.063	1.019	0.945	0.90769	0.926585	0.802083	26.29	24.73	23.25	106	89	105	9.07	11.43	4.14	2.09654e+08	1.54423e+08	1.74626e+08	1.74896e+08	1.27362e+08	1.3307e+08	1.61375e+08	1.71775e+08	1.63141e+08	22	20	22
CAH59743.1	peroxiredoxin 6, partial [OS=Homo sapiens]	0	37.358	69	4	15	2	86	9.7	5.8	43.01	4	Pf00578, Pf08534	9588	PRDX6	1					0	2	1.069	0.974	0.894	0.959365	0.835846	0.604995	33.73	33.19	80.93	95.4	91.2	113.4	17.08	6.37	6.97	3.6902e+07	2.54654e+07	2.54351e+07	2.79478e+07	2.29877e+07	2.28196e+07	3.19103e+07	31506355	2.75507e+07	3	2	3
AAF86466.1	Thioredoxin 1 [OS=Homo sapiens]	0	74.387	69	6	301	1	105	11.7	4.78	995.84	6	Pf00085, Pf13098, Pf13899, Pf13905, Pf14595	7295	TXN	9		Selenium Micronutrient Network; TNF alpha Signaling Pathway; VEGFA-VEGFR2 Signaling Pathway			3	0	1.252	6.889	6.445	0.875623	9.65121e-08	1.42341e-13	21.68	38.92	41.89	156.1	124.7	19.3	34.9	27.27	39.39	692040	1.1657e+06	1.36033e+06	1.04866e+06	879482	564623	92470.4	148612	206553	1	1	1
BAD96324.1	ribosomal protein L5 variant, partial [OS=Homo sapiens]	0	217.075	68	18	209	18	297	34.3	9.66	477.68	18	Pf00861, Pf14204	6125	RPL5	1		Cytoplasmic Ribosomal Proteins			1	0	1.013	0.997	0.995	0.980794	0.890905	0.931735	28.31	29.08	23.17	103.1	98.4	98.5	3.24	1.14	2.48	4.05279e+08	3.4807e+08	3.61365e+08	3.58622e+08	3.13738e+08	3.25712e+08	3.50353e+08	3.31867e+08	3.45809e+08	17	16	17
EAW90382.1	profilin 1, isoform CRA_b [OS=Homo sapiens]	0	158.638	68	12	465	5	104	11.4	9.17	1116.43	12	Pf00235	5216	PFN1	17	ENSG00000108518.7	Association Between Physico-Chemical Features and Toxicity Associated Pathways; VEGFA-VEGFR2 Signaling Pathway; Regulation of Actin Cytoskeleton; G13 Signaling Pathway			4	9	1.045	1.005	0.986	0.966759	0.9032	0.911468	18.93	26.38	23.19	102.9	94.2	102.9	1.42	4.71	1.89	1.07539e+09	9.44428e+08	9.99732e+08	9.99893e+08	8.12491e+08	8.52525e+08	9.83566e+08	9.98695e+08	9.6344e+08	13	15	15
NP_001231867.1	thioredoxin isoform 2 [OS=Homo sapiens]	0	57.384	68	7	178	2	85	9.4	6.04	449.98	7	Pf00085, Pf13098, Pf13899, Pf13905	7295	TXN	9	ENSG00000136810.12	Selenium Micronutrient Network; TNF alpha Signaling Pathway; NRF2 pathway; VEGFA-VEGFR2 Signaling Pathway			4	5	1.031	0.956	0.915	0.995115	0.80166	0.697459	32.62	31.56	32.58	101	98.6	100.5	7.42	8.26	8.42	3.39181e+08	2.56409e+08	3.11792e+08	3.01495e+08	2.35323e+08	2.92984e+08	2.59778e+08	2.96609e+08	2.92625e+08	6	6	6
EAX00978.1	tyrosine 3-monooxygenase/tryptophan 5-monooxygenase activation protein, theta polypeptide, isoform CRA_b [OS=Homo sapiens]	0	123.245	68	15	124	2	141	16.3	7.8	231.22	15	Pf00244	10971	YWHAQ	2		Cell Cycle; Pathogenic Escherichia coli infection; IL-3 Signaling Pathway; Myometrial Relaxation and Contraction Pathways; Calcium Regulation in the Cardiac Cell; Sudden Infant Death Syndrome (SIDS) Susceptibility Pathways			6	0	1.457	1.356	1	0.00578251	0.430893	0.941941	25.65	23.55	30.67	124.3	83.4	92.3	9.69	27.19	25.28	64598164	48877568	5.12595e+07	5.1722e+07	3.09613e+07	2.92289e+07	5.03256e+07	3.74889e+07	2.95927e+07	2	2	2
NP_002957.1	Protein S100-A10 [OS=Homo sapiens]	0	137.203	68	10	102	10	97	11.2	7.37	312.6	10	Pf01023	6281	S100A10	1	ENSG00000197747.8	Prostaglandin Synthesis and Regulation		Dissolution of Fibrin Clot	3	0	1.278	1.151	0.955	0.0587961	0.890905	0.835755	30.59	37.17	29.36	110.9	93.9	95.2	7.58	6.55	10.34	2.98577e+08	2.78045e+08	3.29505e+08	2.79997e+08	2.17652e+08	2.35099e+08	2.2536e+08	2.71836e+08	2.44702e+08	11	11	11
EAW48008.1	ribosomal protein S12, isoform CRA_a [OS=Homo sapiens]	0	70.854	68	4	65	3	97	10.5	6.28	203.14	4	Pf01248	6206	RPS12	6		Cytoplasmic Ribosomal Proteins			1	0	0.881	1.151	1.381	0.314899	0.890905	0.110357	16.21	37.89	33.34	100	109.6	90.4	6.59	4.58	12.82	9.90513e+07	7.602e+07	9.09825e+07	1.05924e+08	8.65912e+07	9.02852e+07	9.51498e+07	7.31981e+07	7.75602e+07	3	3	3
EAX03696.1	ribosomal protein S18, isoform CRA_c [OS=Homo sapiens]	0	114.934	68	13	129	5	128	15	10.27	277.44	13	Pf00416	6222	RPS18	6		Cytoplasmic Ribosomal Proteins			1	8	1.1	1.238	1.163	0.792304	0.728211	0.701181	32.65	32.17	33.5	109.2	102.8	88	3.29	4.13	4.43	4.81187e+08	3.9534e+08	4.34054e+08	4.13129e+08	3.34355e+08	3.75221e+08	3.55609e+08	3.19026e+08	3.29787e+08	13	13	13
NP_006421.2	T-complex protein 1 subunit delta isoform a [OS=Homo sapiens]	0	286.253	68	28	236	27	539	57.9	7.83	633.5	28	Pf00118	10575	CCT4	2	ENSG00000115484.14			BBSome-mediated cargo-targeting to cilium; Prefoldin mediated transfer of substrate to CCT/TriC; Cooperation of PDCL (PhLP1) and TRiC/CCT in G-protein beta folding; Association of TriC/CCT with target proteins during biosynthesis; Formation of tubulin folding intermediates by CCT/TriC; Folding of actin by CCT/TriC	13	1	1.001	1.133	1.141	0.944055	0.916836	0.764261	33.87	30.25	33.2	93.5	105.1	101.4	3.74	5.13	9.86	3.4626e+08	2.84675e+08	3.07267e+08	3.19212e+08	3.02208e+08	3.26937e+08	3.63353e+08	3.1896e+08	2.90677e+08	25	24	24
NP_006752.1	14-3-3 protein epsilon [OS=Homo sapiens]	0	229.731	68	20	259	17	255	29.2	4.74	543.55	20	Pf00244	7531	YWHAE	17; CHR_HSCHR17_2_CTG2	ENSG00000108953.16; ENSG00000274474.3	Cell Cycle; Myometrial Relaxation and Contraction Pathways; VEGFA-VEGFR2 Signaling Pathway; Calcium Regulation in the Cardiac Cell; Sudden Infant Death Syndrome (SIDS) Susceptibility Pathways	Cell cycle; Neurotrophin signaling pathway; PI3K-Akt signaling pathway; Hippo signaling pathway; Viral carcinogenesis; Oocyte meiosis; Epstein-Barr virus infection	Regulation of PLK1 Activity at G2/M Transition; Recruitment of NuMA to mitotic centrosomes; Loss of Nlp from mitotic centrosomes; NADE modulates death signalling; Translocation of GLUT4 to the plasma membrane; Deregulated CDK5 triggers multiple neurodegenerative pathways in Alzheimer's disease models; Chk1/Chk2(Cds1) mediated inactivation of Cyclin B:Cdk1 complex; Signaling by Hippo; AURKA Activa…	65	0	0.999	0.906	0.902	0.93377	0.654293	0.645077	32.43	24.28	21.59	97	96.2	106.8	2.18	0.23	5.19	4.95342e+08	4.18965e+08	4.7523e+08	4.6219e+08	4.06337e+08	4.2771e+08	5.21183e+08	4.92058e+08	4.57305e+08	17	17	17
AAH24292.1	Keratin 5 [OS=Homo sapiens]	0	583.146	68	60	751	48	590	62.3	7.74	1639.95	60	Pf00038, Pf01576, Pf02994, Pf03961, Pf04111, Pf05957, Pf12128	3852	KRT5	12					0	5	1.064	1.024	0.983	0.90258	0.93912	0.901824	34.14	35.59	35.85	94.6	100.2	105.2	12.4	11.88	15.28	3.41817e+09	3.78288e+09	3.98627e+09	3.38654e+09	3.66574e+09	3.90338e+09	3.34796e+09	4.42052e+09	4.18121e+09	48	49	48
NP_001302.1	Cysteine-rich protein 1 [OS=Homo sapiens]	0	58.925	68	4	50	4	77	8.5	8.75	103.71	4	Pf00412	1396	CRIP1	14	ENSG00000257341.5; ENSG00000213145.9				0	0	1.125	1.057	0.924	0.673587	0.982947	0.724593	33.61	33.45	29.57	102.7	96.4	100.9	18.6	21.48	20.61	7.16292e+07	9.02106e+07	92701440	6.19833e+07	8.41408e+07	7.99193e+07	6.18e+07	8.65742e+07	9.00307e+07	4	4	4
NP_783316.2	metallothionein-1E [OS=Homo sapiens]	0	41.397	67	4	32	2	61	6	7.96	64.54	4		4493	MT1E	16	ENSG00000169715.14	Copper homeostasis; Zinc homeostasis	Mineral absorption	Metallothioneins bind metals	6	0	1.53	2.629	2.081	0.27148	0.00343458	0.00489991	50.02	46.38	36.82	182.9	116.8	0.3	6.73	22.88	25.84	3.64507e+06	3.21665e+06	3.90034e+06	1.58219e+06	2.21881e+06	2.05115e+06	6103.65	4393.88	7412.73	2	2	2
AAH66926.1	ribosomal protein S3a [OS=Homo sapiens]	0	242.374	67	25	239	25	264	30	9.73	481.67	25	Pf01015	6189	RPS3A	4		Cytoplasmic Ribosomal Proteins			1	0	0.976	1.04	1.091	0.86718	0.966344	0.889401	28.1	23.55	23.3	105	104.2	90.9	1.48	2.69	9.67	9.55787e+08	8.37168e+08	9.32399e+08	9.17383e+08	7.84888e+08	8.0628e+08	8.90564e+08	7.34754e+08	7.43494e+08	24	23	23
NP_006588.1	heat shock cognate 71 kDa protein isoform 1 [OS=Homo sapiens]	0	677.97	67	47	801	41	646	70.9	5.52	2084.1	47	Pf00012, Pf02463, Pf06723	3312	HSPA8	11	ENSG00000109971.13	Parkin-Ubiquitin Proteasomal System pathway; MAPK Signaling Pathway; Exercise-induced Circadian Regulation	Measles; MAPK signaling pathway; Longevity regulating pathway - multiple species; Estrogen signaling pathway; Toxoplasmosis; Spliceosome; Endocytosis; Antigen processing and presentation; Influenza A; Protein processing in endoplasmic reticulum; Epstein-Barr virus infection; Legionellosis	Protein methylation; Clathrin-mediated endocytosis; Regulation of HSF1-mediated heat shock response; Golgi Associated Vesicle Biogenesis; GABA synthesis, release, reuptake and degradation; Lysosome Vesicle Biogenesis; CHL1 interactions; AUF1 (hnRNP D0) binds and destabilizes mRNA; Attenuation phase; Neutrophil degranulation; mRNA Splicing - Major Pathway; Interleukin-4 and 13 signaling; HSP90 cha…	52	6	1.024	0.98	0.961	0.99773	0.849243	0.855388	26.36	31.71	23.36	103.4	99.3	97.3	4.43	5.09	2.68	3.86223e+09	3.27598e+09	3.35981e+09	3.11466e+09	2.96976e+09	3.17457e+09	3.39846e+09	3.17694e+09	3.16088e+09	47	50	49
NP_112487.1	SRA stem-loop-interacting RNA-binding protein, mitochondrial isoform 1 precursor [OS=Homo sapiens]	0	42.102	67	6	39	6	109	12.3	10.24	59.33	6	Pf00076, Pf13893, Pf14259	81892	SLIRP	14	ENSG00000119705.9				0	0	0.934	1.251	1.33	0.662113	0.696747	0.195679	14.41	15.84	19.06	102.9	110	87.1	7.87	10.22	6.76	7.55913e+07	6.17591e+07	7.85076e+07	8.60824e+07	6.66154e+07	6.53549e+07	5.33139e+07	5.76931e+07	5.9184e+07	5	5	6
CAG46507.1	PHB, partial [OS=Homo sapiens]	0	156.096	67	17	111	17	272	29.8	5.76	264.49	17	Pf01145	5245	PHB	17					0	0	0.933	1.08	1.141	0.658739	0.988452	0.762937	28.72	35.21	35.56	93.3	110.1	96.6	7.68	8.1	4.55	2.98815e+08	2.26056e+08	2.53332e+08	3.22011e+08	2.40203e+08	2.7468e+08	2.61099e+08	2.34012e+08	2.47454e+08	16	14	13
AAH18140.1	RPS21 protein [OS=Homo sapiens]	0	90.772	67	6	88	6	81	8.8	8.5	281.3	6	Pf01249	6227	RPS21	20	ENSG00000171858.17	Cytoplasmic Ribosomal Proteins			1	0	0.995	1.125	1.174	0.916593	0.932387	0.668409	18.37	15	13.16	97.1	109	93.9	13.25	3.26	9.86	1.25177e+08	1.02868e+08	1.43328e+08	1.39063e+08	1.15924e+08	1.21448e+08	1.26879e+08	1.02811e+08	1.08408e+08	4	4	4
NP_004550.2	Nuclease-sensitive element-binding protein 1 [OS=Homo sapiens]	0	302.256	67	13	186	11	324	35.9	9.88	441.45	13	Pf00313	4904	YBX1	1	ENSG00000065978.18	Brain-Derived Neurotrophic Factor (BDNF) signaling pathway; Mecp2 and Associated Rett Syndrome; mRNA Processing; Sudden Infant Death Syndrome (SIDS) Susceptibility Pathways		mRNA Splicing - Major Pathway; mRNA Splicing - Minor Pathway	9	2	1.319	1.181	0.981	0.0200969	0.834567	0.897247	38.28	34.08	38.71	132	87.2	80.8	16.19	16.75	20.66	5.60895e+08	3.53586e+08	4.54537e+08	3.83703e+08	2.49668e+08	2.75686e+08	3.53896e+08	2.64378e+08	2.32659e+08	13	13	13
EAW62453.1	ribosomal protein S17, isoform CRA_a [OS=Homo sapiens]	0	89.511	67	4	42	1	78	8.9	5.49	201.18	4	Pf00833	6218	RPS17	15		Cytoplasmic Ribosomal Proteins			1	0	0.63	3.176	5.038	0.457876	0.0183821	2.98252e-09	73.19	8.47	77.5	103.4	164	32.6	8.07	65.51		358264	279000		305647	730783				95409.9	1	1
AAB59392.1	hypoxanthine phosphoribosyltransferase, partial [OS=Homo sapiens]	0	112.758	67	14	90	14	218	24.6	6.68	184.09	14	Pf00156, Pf15610	3251	HPRT1	X		Nucleotide Metabolism			1	0	1.12	1.114	0.987	0.701817	0.951005	0.91182	28.57	30.51	24.73	109.2	96	94.8	3	8.09	5.36	1.23333e+08	1.10136e+08	124240985	1.13132e+08	8.44013e+07	9.66666e+07	9.94998e+07	107496902	9.81028e+07	12	12	12
NP_066952.1	Inorganic pyrophosphatase [OS=Homo sapiens]	0	175.698	66	13	98	13	289	32.6	5.86	280.25	13	Pf00719	5464	PPA1	10	ENSG00000180817.11		Oxidative phosphorylation	Cytosolic tRNA aminoacylation; Pyrophosphate hydrolysis	7	0	1.015	0.945	0.902	0.985134	0.776317	0.644964	31.86	33.47	33.72	99.3	97.2	103.5	17	8.53	8.09	1.52194e+08	9.58669e+07	1.16141e+08	1.20276e+08	8.89142e+07	1.04376e+08	1.21356e+08	1.1498e+08	1.00923e+08	13	11	13
BAD97114.1	prefoldin 1 variant, partial [OS=Homo sapiens]	0	30.244	66	7	32	7	122	14.2	6.81	42.04	7	Pf01920	5201	PFDN1	5					0	0	1.029	1.082	1.08	0.993345	0.988004	0.912404	19.89	25.02	17.16	89.2	110.8	99.9	17.74	1.56	2.28	2.85516e+07	2.62549e+07	3.72671e+07	3.51252e+07	3.05058e+07	33259021	3.0994e+07	3.03897e+07	3.13655e+07	5	6	6
NP_055227.1	calcyclin-binding protein isoform 1 [OS=Homo sapiens]	0	147.495	66	14	115	14	228	26.2	8.25	332.57	14	Pf04969, Pf05002, Pf09032	27101	CACYBP	1	ENSG00000116161.17	Gastric cancer network 2	Wnt signaling pathway		2	0	1.171	1.164	0.988	0.439118	0.870124	0.913684	15.52	22.93	18.96	113.8	96.7	89.5	4.24	2.29	1.59	1.61855e+08	148340430	1.67285e+08	1.34984e+08	1.2347e+08	1.25941e+08	1.2302e+08	1.21484e+08	1.16952e+08	11	12	13
BAF84244.1	unnamed protein product [OS=Homo sapiens]	0	427.357	66	38	320	38	543	62.6	6.8	744.63	38	Pf00515, Pf12895, Pf13414, Pf13424, Pf13432	10963	STIP1	11					0	0	1.044	1.117	1.038	0.966759	0.946063	0.993203	27.92	29.42	27.5	107.3	99	93.8	1.15	6.26	0.45	6.75785e+08	5.79728e+08	6.27918e+08	6.32326e+08	505198628	5.21891e+08	5.34344e+08	5.20357e+08	5.21041e+08	32	35	35
NP_665807.1	Myotrophin [OS=Homo sapiens]	0	49.673	66	5	42	5	118	12.9	5.52	108.93	5	Pf00023, Pf12796, Pf13606, Pf13637, Pf13857	767558; 136319	LUZP6; MTPN	7	ENSG00000105887.10				0	0	1.052	1.056	1.014	0.986795	0.981141	0.973659	10.62	18.39	18.51	104.5	99.6	95.8	4.16	2.22	5.46	3.43877e+07	2.87416e+07	3.39717e+07	3.1747e+07	2.66602e+07	2.85918e+07	2.90243e+07	3.07823e+07	2.75604e+07	4	4	4
NP_001748.1	carbonyl reductase [NADPH] 1 isoform 1 [OS=Homo sapiens]	0	100.635	66	14	53	11	277	30.4	8.32	119.37	14	Pf00106, Pf01370, Pf08659, Pf13561	873; 54093	CBR1; SETD4	21	ENSG00000159228.12	NRF2 pathway	Arachidonic acid metabolism; Metabolic pathways; Chemical carcinogenesis; Metabolism of xenobiotics by cytochrome P450	Synthesis of Prostaglandins (PG) and Thromboxanes (TX)	10	3	1.002	0.944	0.902	0.931617	0.771663	0.644949	21.17	23.84	15.85	100.6	94.7	104.7	7.31	8.12	3.59	9.39189e+07	7.69049e+07	7.70191e+07	8.45372e+07	6.30256e+07	7.23012e+07	8.96366e+07	8.2473e+07	8.21409e+07	13	13	12
AAA59586.1	MT1A, partial [OS=Homo sapiens]	0	15.452	66	3	12	2	61	6.1	7.96	15.2	3		4489	MT1A	16		Zinc homeostasis			1	0	1.472	2.742	1.766	0.664203	0.0231895	0.131185	8.44	0.06	8.88	149.3	96.2	54.5	6.05	8.45		1.40343e+06	1225705	1197784		791434	742528			458316	1	1	1
BAG60202.1	unnamed protein product [OS=Homo sapiens]	0	468.967	66	20	1019	8	395	42.6	9.01	3362.24	20	Pf00009, Pf03143, Pf03144	1915	EEF1A1	6		Translation Factors			1	14	0.92	0.878	0.981	0.583645	0.54621	0.897404	32.47	26.71	36.32	88.1	103.4	108.4	7.12	1.55	5.61	3.78486e+09	2.89091e+09	3.24044e+09	3.6664e+09	3.30462e+09	3.49277e+09	3.90068e+09	3.4483e+09	3.75944e+09	18	21	21
AAA35748.1	Cytokeratin 8 [OS=Homo sapiens]	0	740.976	65	56	1283	2	483	53.7	5.36	3088.54	56	Pf00038, Pf01576, Pf13166, Pf15003	3856	KRT8	12					0	0	0.79	0.63	0.797	0.218577	0.0115788	0.182136	20.22	19.64	18.24	77.8	98.6	123.6	22.37	12.45	15.94	8.24507e+06	11376724	10902925	15177633	10357949	12683405	13653328	18480934	1.63354e+07	1	1	1
AAA36025.1	90 kDa heat shock protein [OS=Homo sapiens]	0	929.557	65	64	1436	40	724	83.2	5.03	3115.88	64	Pf00183, Pf02518, Pf13589	3326	HSP90AB1	6					0	26	1.081	0.974	0.933	0.859975	0.835006	0.757302	29.66	28.76	25.77	106.7	94.2	99.1	4.99	2.29	3.14	4.38485e+09	3.72663e+09	3.77631e+09	3.62471e+09	3.0368e+09	3.28561e+09	3.80718e+09	3.51e+09	3.55238e+09	64	62	61
BAD97275.1	serine hydroxymethyltransferase 2 (mitochondrial) variant, partial [OS=Homo sapiens]	0	268.773	65	28	215	27	504	55.9	8.4	480.53	28	Pf00464	6472	SHMT2	12		Vitamin B12 Metabolism; Folate Metabolism; One Carbon Metabolism; Trans-sulfuration and one carbon metabolism			4	1	0.759	1.103	1.328	0.00248657	0.967226	0.199304	27.82	32.14	24.69	92	116.6	91.4	3.4	8.26	6.28	3.94372e+08	3.33634e+08	3.49784e+08	5.17456e+08	3.99469e+08	4.13001e+08	3.19707e+08	3.54424e+08	3.39992e+08	26	26	24
EAW52998.1	lamin A/C, isoform CRA_c [OS=Homo sapiens]	0	628.621	65	60	600	5	790	87.3	8.72	1357.57	60	Pf00038, Pf00932, Pf02463, Pf05911, Pf12128	4000	LMNA	1		Arrhythmogenic Right Ventricular Cardiomyopathy; Adipogenesis; Fas Ligand (FasL) pathway and Stress induction of Heat Shock Proteins (HSP) regulation			3	56	0.945	0.893	0.92	0.731333	0.606443	0.713773	26.36	29.98	27.8	98.9	97.6	103.4	3.79	12.09	12.4	2.21871e+09	1.83287e+09	1.96071e+09	2.33778e+09	1.70895e+09	1.74018e+09	2.41563e+09	1.98047e+09	1.86612e+09	58	59	60
P49411.2	RecName: Full=Elongation factor Tu, mitochondrial; Short=EF-Tu; AltName: Full=P43; Flags: Precursor [OS=Homo sapiens]	0	308.389	65	25	197	25	452	49.5	7.61	556.17	25	Pf00009, Pf03143, Pf03144	7284	TUFM	16				Mitochondrial translation elongation	4	0	0.936	1.228	1.267	0.671634	0.752318	0.354792	27.91	33.53	28.77	111.7	107.5	80.8	5.83	9.03	8.01	4.18096e+08	3.34432e+08	3.56133e+08	3.96059e+08	3.03966e+08	3.10662e+08	2.91581e+08	2.49755e+08	2.47406e+08	22	23	22
AAD26137.1	nuclear chloride channel [OS=Homo sapiens]	0	175.142	65	15	177	15	241	26.9	5.1	551.18	15	Pf00043, Pf13409, Pf13410, Pf13417	1192	CLIC1	6					0	0	0.984	0.922	0.909	0.882992	0.709551	0.672082	27.76	52.38	36.04	109.3	99.6	91.1	1.46	10.73	9.77	3.44016e+08	3.07284e+08	3.35679e+08	3.57654e+08	2.59595e+08	2.79527e+08	3.14613e+08	2.64679e+08	2.56828e+08	13	14	14
BAF83456.1	unnamed protein product [OS=Homo sapiens]	0	417.362	64	33	331	33	535	57.4	6.46	905.44	33	Pf00118	10576	CCT2	12					0	0	1.024	1.013	1.027	0.99773	0.914884	0.993203	23.44	22.02	23.61	101.7	102.5	95.7	1.66	2.69	2.83	6.17097e+08	5.21621e+08	5.73005e+08	5.78694e+08	4.82042e+08	5.30586e+08	5.22975e+08	4.96629e+08	5.21708e+08	33	32	32
BAG59786.1	unnamed protein product [OS=Homo sapiens]	0	105.88	64	13	92	2	154	18.1	10.48	191.39	13	Pf01775	6142	RPL18A	19		Cytoplasmic Ribosomal Proteins			1	11	0.85	0.725	0.959	0.144127	0.097646	0.848757	41.79	43.72	36.13	88.6	98.1	113.3	6.34	1.54	4.21	1.08695e+08	8.65763e+07	1.06593e+08	1.13201e+08	1.00992e+08	1.03567e+08	1.28051e+08	1.27126e+08	1.16566e+08	13	13	13
EAX06870.1	cytidylate kinase, isoform CRA_b [OS=Homo sapiens]	0	42.6	64	7	45	1	137	15.3	7.12	80.37	7	Pf00406, Pf13207, Pf13238, Pf13671	51727	CMPK1	1					0	0	1.042	1.138	1.092	0.997968	0.97494	0.97383	30.01	19.34	29.24	105.7	101.4	92.9	19.94	30.81	0.78	2386577	1.38805e+06	2.00455e+06	2.28062e+06	1046432	1.76686e+06		1.66493e+06	1.67093e+06	1	1	1
AAC03787.1	malate dehydrogenase precursor [OS=Homo sapiens]	0	281.05	64	23	281	23	338	35.5	8.68	801.42	23	Pf00056, Pf01073, Pf01118, Pf02866, Pf13460	4191	MDH2	7		Glycolysis and Gluconeogenesis; TCA Cycle			2	0	0.933	1.057	1.145	0.657152	0.981982	0.748554	30.83	28.32	24.82	105.3	102	92.7	7.2	14.53	2.19	8.54882e+08	6.79232e+08	7.0586e+08	8.94268e+08	6.09471e+08	6.57509e+08	6.30529e+08	6.18395e+08	5.907e+08	21	21	20
NP_003891.1	sequestosome-1 isoform 1 [OS=Homo sapiens]	0	272.755	64	21	144	21	440	47.7	5.22	455.73	21	Pf00564, Pf00569	8878	SQSTM1	5	ENSG00000161011.19	Regulation of toll-like receptor signaling pathway; IL-1 signaling pathway; RANKL/RANK (Receptor activator of NFKB (ligand)) Signaling Pathway; Brain-Derived Neurotrophic Factor (BDNF) signaling pathway; Apoptosis-related network due to altered Notch3 in ovarian cancer; NRF2 pathway; Interleukin-1 Induced Activation of NF-kappa-B; Senescence and Autophagy in Cancer	Osteoclast differentiation	Interleukin-1 family signaling; NF-kB is activated and signals survival; Signalling by NGF; p75NTR recruits signalling complexes; NRIF signals cell death from the nucleus; Pink/Parkin Mediated Mitophagy	24	0	0.365	0.522	1.462	2.97569e-16	0.000185407	0.03798	48.61	48.91	40.67	56.6	148.8	94.6	28.41	15.91	22.73	1.28949e+08	7.06461e+07	7.73081e+07	2.53894e+08	1.66473e+08	1.86558e+08	1.57561e+08	9.77439e+07	1.2185e+08	18	12	11
EAW52996.1	lamin A/C, isoform CRA_a [OS=Homo sapiens]	0	602.513	64	57	580	2	698	78.3	8.9	1260.31	57	Pf00038, Pf00932, Pf05911, Pf12128	4000	LMNA	1		Arrhythmogenic Right Ventricular Cardiomyopathy; Adipogenesis; Fas Ligand (FasL) pathway and Stress induction of Heat Shock Proteins (HSP) regulation			3	0	0.893	0.841	0.95	0.570879	0.408638	0.818415	11.71	13.22	17.14	91.4	99.9	108.7	5.83	7.56	8.18	3.12346e+07	2.92066e+07	33326336	3.81621e+07	2.89591e+07	3.19073e+07	4.04843e+07	3.37863e+07	3.56557e+07	2	2	2
BAF84660.1	unnamed protein product [OS=Homo sapiens]	0	355.533	64	29	360	15	406	46.1	5.48	1017.41	29	Pf00270, Pf00271, Pf04851	1973	EIF4A1	17		Translation Factors; Interferon type I signaling pathways			2	14	1.038	1.05	1.013	0.984053	0.971087	0.970106	26.68	20.93	22.73	103.8	98.6	97.6	4.14	7.96	6.14	1.03195e+09	8.37892e+08	9.14343e+08	9.25926e+08	6.92259e+08	7.97317e+08	8.87035e+08	7.68879e+08	8.10568e+08	28	29	28
AAF23374.1	MLL septin-like fusion protein MSF-A [OS=Homo sapiens]	0	212.345	64	28	139	28	586	65.3	8.97	329.91	28	Pf00735, Pf01926, Pf03193, Pf04548	10801	SEPT9	17					0	0	1.187	1.255	1.086	0.350159	0.684895	0.897641	23.1	29.89	27.63	112.3	103.6	84.1	9.23	7.38	5.44	1.60438e+08	1.67712e+08	1.62442e+08	1.4172e+08	1.43397e+08	1.37641e+08	1.09687e+08	1.15674e+08	1.1882e+08	21	21	21
BAG59745.1	unnamed protein product [OS=Homo sapiens]	0	195.633	64	14	135	14	238	26.6	5.29	367.84	14	Pf00307, Pf03271	22919	MAPRE1	20					0	0	1.042	1.021	0.98	0.972412	0.933216	0.897247	25.72	27.62	22.29	113.1	100.9	86	1.61	3.98	6.28	2.57568e+08	2.18782e+08	2.37743e+08	2.20217e+08	1.84211e+08	1.88773e+08	1.75337e+08	1.61008e+08	1.81261e+08	13	13	13
EAW62679.1	heterogeneous nuclear ribonucleoprotein K, isoform CRA_e [OS=Homo sapiens]	0	385.465	64	30	347	30	464	51.2	5.39	999.28	30	Pf00013, Pf08067, Pf13014, Pf13083	3190	HNRNPK	9		mRNA Processing			1	0	1.033	1.015	0.983	0.993345	0.917292	0.902173	36.56	43.93	26.7	102	97.4	100.7	2.9	4.04	4.8	8.36842e+08	7.52631e+08	8.41936e+08	8.25418e+08	6.78777e+08	7.115e+08	7.83273e+08	7.9567e+08	7.17759e+08	28	29	27
AAM18189.1	endoplasmic reticulum-associated amyloid beta peptide-binding protein, partial [OS=Homo sapiens]	0	114.39	64	10	74	2	196	20.6	7.87	211.94	10	Pf00106, Pf08659, Pf13561	3028	HSD17B10	X		Tryptophan metabolism			1	0	0.827	0.947	1.146	0.320512	0.780632	0.747659	6.51	2.74	8.41	91.9	111.1	97	2.52	19.91	3.69	16476802	14973176	15553293	25426730	16432602	16615194	16010656	16634900	15439494	1	1	1
AAH69613.1	p21 protein (Cdc42/Rac)-activated kinase 2 [OS=Homo sapiens]	0	165.819	64	20	116	20	524	58.1	6.09	266.12	20	Pf00069, Pf00786, Pf07714, Pf14531	5062	PAK2	3		Integrin-mediated Cell Adhesion; Apoptosis-related network due to altered Notch3 in ovarian cancer; Focal Adhesion; Fas Ligand (FasL) pathway and Stress induction of Heat Shock Proteins (HSP) regulation; TGF-beta Signaling Pathway; MAPK Signaling Pathway; VEGFA-VEGFR2 Signaling Pathway; Regulation of Actin Cytoskeleton			8	0	1.057	1.164	1.147	0.932599	0.870299	0.745124	27.67	34.61	29.91	104.4	100.3	95.4	8.16	2.98	7.26	83079078	7.95326e+07	9.29099e+07	7.85213e+07	7.21918e+07	7.70117e+07	7.06324e+07	8.00738e+07	7.4558e+07	15	16	16
AAF00150.1	RAB14 protein [OS=Homo sapiens]	0	108.03	64	12	71	11	215	23.9	6.21	181.55	12	Pf00009, Pf00025, Pf00071, Pf04670, Pf08477	51552	RAB14	9					0	1	0.884	0.889	1	0.330109	0.592066	0.944045	17.77	21.75	19.6	94.3	98.5	107.2	10.39	11.23	7.03	1.26961e+08	9.4728e+07	9.97078e+07	1.25819e+08	9.35224e+07	9.48411e+07	1.26102e+08	1.11275e+08	1.07651e+08	12	12	10
AAH59950.1	Rpl12 protein [OS=Homo sapiens]	0	111.057	64	8	103	1	132	14.2	8.65	363.34	8	Pf00298, Pf03946	6136	RPL12	9	ENSG00000197958.12	Cytoplasmic Ribosomal Proteins			1	0	0.86	0.803	0.969	0.421741	0.278988	0.882535	9.49	14.86	13.51	89.4	99.3	111.3	4.37	11.17	13.17	28490362	22850640	26489437	28613717	25568423	32313708	26995104	3.13553e+07	3.42459e+07	1	1	1
EAX03782.1	ribosomal protein S10, isoform CRA_a [OS=Homo sapiens]	0	84.639	64	11	103	2	170	19.9	10.11	210.03	11	Pf03501	6204	RPS10	6		Cytoplasmic Ribosomal Proteins			1	9	1.079	1.124	1.016	0.887566	0.934192	0.976519	36.89	31.34	43.52	100.4	96.4	103.2	15.91	15.63	5.7	9.43875e+07	6.19061e+07	7.0474e+07	8.20362e+07	5.32982e+07	6.21576e+07	7.01919e+07	6.32496e+07	7.01353e+07	11	9	10
AAH53371.1	Ribosomal protein S27a [OS=Homo sapiens]	0	123.386	63	12	170	12	156	17.9	9.6	391.8	12	Pf00240, Pf01599, Pf11976, Pf13019, Pf13881, Pf14560	6233	RPS27A	2		Cytoplasmic Ribosomal Proteins			1	0	0.775	0.873	1.223	0.00610979	0.529747	0.506788	49.49	48.92	29.03	89.7	120.8	89.5	16.63	6.25	15.54	2.4658e+08	1.55598e+08	1.91443e+08	2.75446e+08	2.23811e+08	2.25909e+08	2.38353e+08	1.79337e+08	1.79971e+08	10	9	10
AAH62302.1	Phosphoglycerate mutase 1 (brain) [OS=Homo sapiens]	0	215.944	63	16	169	16	254	28.8	7.18	458.42	16	Pf00300	5223	PGAM1	10		Glycolysis and Gluconeogenesis			1	0	1.072	1.049	0.971	0.881607	0.970674	0.883272	28.67	33.56	26.49	98.6	96.1	105.2	2.11	10.13	3.19	3.1059e+08	2.7298e+08	2.85369e+08	2.66997e+08	2.84826e+08	2.64078e+08	3.17924e+08	2.9269e+08	2.96861e+08	15	15	15
AAC51518.1	ER-60 protein [OS=Homo sapiens]	0	336.426	63	32	261	32	505	56.7	6.21	691.12	32	Pf00085, Pf13098, Pf13848, Pf13899, Pf13905	2923	PDIA3	15					0	0	0.95	0.975	0.99	0.761031	0.838221	0.917011	26.1	37.82	25.67	101.2	104.5	94.3	5.47	0.62	2.43	4.71153e+08	3.6958e+08	4.34461e+08	4.47798e+08	3.87988e+08	4.12214e+08	3.92615e+08	3.70836e+08	3.85524e+08	31	31	31
NP_001291217.1	40S ribosomal protein SA isoform 2 [OS=Homo sapiens]	0	263.162	63	17	234	17	300	33.3	4.87	725.72	17	Pf00318	3921	RPSA	3	ENSG00000168028.13	Cytoplasmic Ribosomal Proteins			1	0	1.02	1.005	1.003	0.994452	0.903594	0.94838	16.17	18.71	19.13	102.3	100.9	96.8	6.91	3.6	1.84	6.10663e+08	4.64183e+08	5.4645e+08	5.33545e+08	4.39531e+08	4.95221e+08	5.00949e+08	4.78729e+08	4.92579e+08	17	15	18
NP_002564.1	Platelet-activating factor acetylhydrolase IB subunit gamma [OS=Homo sapiens]	0	69.815	63	8	37	8	231	25.7	6.84	100.97	8	Pf00657, Pf13472	5050	PAFAH1B3	19	ENSG00000079462.7		Metabolic pathways; Ether lipid metabolism	COPI-independent Golgi-to-ER retrograde traffic	7	0	1.042	1.093	1.017	0.986795	0.972839	0.977674	26.73	36.07	22.66	108.9	98.1	92.9	4.9	10.73	8.01	5.05708e+07	4.84017e+07	4.89516e+07	5.12463e+07	3.69022e+07	4.05102e+07	36954647	4.25274e+07	3.93883e+07	7	7	7
EAW68477.1	proteasome (prosome, macropain) subunit, alpha type, 1, isoform CRA_b [OS=Homo sapiens]	0	157.433	63	15	123	15	306	33.9	7.12	276.37	15	Pf00227, Pf10584	5682	PSMA1	11		Proteasome Degradation			1	0	1.04	1.116	1.1	0.979631	0.947454	0.883272	22.14	28.05	22.6	100.1	101.6	98.3	4.04	2.12	1.6	2.05251e+08	1.79063e+08	2.08763e+08	1.9836e+08	1.66899e+08	1.81737e+08	1.86813e+08	1.81964e+08	176301661	13	14	15
AAA93227.1	Ki nuclear autoantigen, partial [OS=Homo sapiens]	0	12.181	63	3	16	1	54	6.3	9.25	30.87	3	Pf02252	10197	PSME3	17		Proteasome Degradation			1	0	0.01	0.01	0.582	2.97569e-16	1.62313e-16	9.00673e-05			3.11		110.5	189.5		1.6	3.02					3710670	3.83606e+06	7.31877e+06	6767292	6.829e+06
NP_004085.1	Eukaryotic translation initiation factor 2 subunit 1 [OS=Homo sapiens]	0	190.93	63	18	165	18	315	36.1	5.08	424.36	18	Pf00575, Pf07541	1965	EIF2S1	14	ENSG00000134001.12	Translation Factors; Brain-Derived Neurotrophic Factor (BDNF) signaling pathway	Influenza A; Apoptosis; Measles; Hepatitis C; Protein processing in endoplasmic reticulum; RNA transport; Non-alcoholic fatty liver disease (NAFLD); Herpes simplex infection	Formation of the ternary complex, and subsequently, the 43S complex; L13a-mediated translational silencing of Ceruloplasmin expression; ABC-family proteins mediated transport; Translation initiation complex formation; PERK regulates gene expression; GTP hydrolysis and joining of the 60S ribosomal subunit; Recycling of eIF2:GDP; Ribosomal scanning and start codon recognition	25	0	0.896	0.866	0.962	0.411004	0.498597	0.861528	23.77	24.33	18.12	93.8	101.3	104.9	8.43	5.61	6.03	2.19037e+08	1.6148e+08	1.92315e+08	2.22488e+08	1.75277e+08	1.90778e+08	2.23917e+08	194830756	2.02737e+08	18	18	18
NP_000909.2	protein disulfide-isomerase precursor [OS=Homo sapiens]	0	336.719	63	31	287	31	508	57.1	4.87	628.89	31	Pf00085, Pf01216, Pf13098, Pf13848, Pf13899, Pf13905	5034	P4HB	17	ENSG00000185624.14		Protein processing in endoplasmic reticulum	Post-translational protein phosphorylation; Regulation of Insulin-like Growth Factor (IGF) transport and uptake by Insulin-like Growth Factor Binding Proteins (IGFBPs); VLDL assembly; Chylomicron assembly; Collagen biosynthesis and modifying enzymes; Interleukin-12 family signaling; Detoxification of Reactive Oxygen Species; Hedgehog ligand biogenesis	23	0	1.115	1.093	0.962	0.726586	0.972875	0.860429	32.26	28.76	25.66	95	91.1	113.8	5.36	10.59	7.86	4.90058e+08	3.96069e+08	4.20366e+08	4.42693e+08	3.13893e+08	3.79317e+08	5.00183e+08	4.94422e+08	4.25178e+08	28	29	29
NP_004604.2	Protein-glutamine gamma-glutamyltransferase 2 isoform a [OS=Homo sapiens]	0	587.202	63	39	770	39	687	77.3	5.22	2395.33	39	Pf00868, Pf00927, Pf01841	7052	TGM2	20	ENSG00000198959.11		Huntington's disease		1	0	1.114	0.899	0.83	0.736296	0.629036	0.301516	50.1	52.36	54.4	96.4	92.4	111.2	26.06	25.36	29.32	1.42162e+09	2.0214e+09	2.2417e+09	1.29596e+09	1.85445e+09	1.93558e+09	1.40452e+09	2.45606e+09	2.39057e+09	39	38	39
P22061.4	RecName: Full=Protein-L-isoaspartate(D-aspartate) O-methyltransferase; Short=PIMT; AltName: Full=L-isoaspartyl protein carboxyl methyltransferase; AltName: Full=Protein L-isoaspartyl/D-aspartyl methyltransferase; AltName: Full=Protein-beta-aspartate methyltransferase [OS=Homo sapiens]	0	110.078	63	8	60	8	227	24.6	7.21	177.13	8	Pf01135, Pf01209, Pf05175, Pf06325, Pf08241, Pf12847, Pf13489, Pf13659, Pf13847	5110	PCMT1	6				Protein repair	2	0	0.948	0.948	1.022	0.776359	0.783441	0.983336	43.87	68.86	33.62	87.9	112.6	99.6	12.66	8.41	14.8	6.39417e+07	4.40284e+07	5.07857e+07	5.71092e+07	5.91223e+07	5.97506e+07	6.9489e+07	5.2024e+07	5.42677e+07	8	8	8
NP_036611.2	14-3-3 protein gamma [OS=Homo sapiens]	0	152.146	62	16	142	10	247	28.3	4.89	259.44	16	Pf00244	7532	YWHAG	7	ENSG00000170027.6	Cell Cycle; Prolactin Signaling Pathway; Myometrial Relaxation and Contraction Pathways; Calcium Regulation in the Cardiac Cell; Sudden Infant Death Syndrome (SIDS) Susceptibility Pathways	Oocyte meiosis; PI3K-Akt signaling pathway; Epstein-Barr virus infection; Cell cycle; Hippo signaling pathway; Viral carcinogenesis	Chk1/Chk2(Cds1) mediated inactivation of Cyclin B:Cdk1 complex; Regulation of PLK1 Activity at G2/M Transition; AURKA Activation by TPX2; Anchoring of the basal body to the plasma membrane; Recruitment of NuMA to mitotic centrosomes; Activation of BAD and translocation to mitochondria ; Recruitment of mitotic centrosome proteins and complexes; Loss of Nlp from mitotic centrosomes; Translocation o…	48	0	0.986	0.987	1.057	0.89111	0.870371	0.960518	24.46	26.93	25.51	99.5	106.4	94.1	6.61	4.16	1.72	2.30336e+08	2.27735e+08	2.43361e+08	2.57747e+08	2.2706e+08	2.22769e+08	2.28801e+08	2.17e+08	2.17078e+08	9	10	10
AAB35169.1	17 kDa cyclophilin A {internal fragment} [OS=Homo sapiens]	0	39.992	62	1	73	1	29	3.2	4.28	206.41	1									0	0	1.013	0.33	0.236	0.974276	3.58672e-11	1.7785e-16	65.93	81.75	69.09	64.7	42.7	192.6	37.7	66.81	75.66	9.1991e+06	7.37721e+06	3.92063e+06	3.94277e+06	4.60273e+06	1.21799e+07	1.10934e+07	2.26854e+07	5.29374e+07	2	2	2
EAX02335.1	ribonuclease/angiogenin inhibitor 1, isoform CRA_c, partial [OS=Homo sapiens]	0	182.475	62	19	98	19	466	50.3	4.92	336.22	19	Pf13855	6050	RNH1	11					0	0	1.153	0.958	0.864	0.629191	0.801912	0.468603	32.2	36.15	20.42	105	89.2	105.7	5.33	12.91	0.64	8.3535e+07	6.58948e+07	7.35185e+07	6.23963e+07	5.42518e+07	4.56411e+07	7.17657e+07	7.03412e+07	6.90541e+07	16	17	16
AAB00969.1	ribosomal protein, partial [OS=Homo sapiens]	0	256.205	62	14	146	14	192	21.8	10.1	510.75	14	Pf01251	6201	RPS7	2		Cytoplasmic Ribosomal Proteins			1	0	1.094	1.057	1.162	0.820122	0.982876	0.70282	46.16	81.67	44.88	110.9	97.2	91.9	10.47	5.15	10.58	2.51247e+08	1.78361e+08	2.11311e+08	1.9184e+08	1.51767e+08	1.70081e+08	1.72196e+08	1.38719e+08	1.65226e+08	15	16	14
NP_005564.1	lamin-B1 isoform 1 [OS=Homo sapiens]	0	259.222	62	32	223	28	586	66.4	5.16	480.3	32	Pf00038, Pf00932, Pf01576, Pf07888, Pf09726, Pf09731, Pf10186, Pf12128	4001	LMNB1	5	ENSG00000113368.11	Fas Ligand (FasL) pathway and Stress induction of Heat Shock Proteins (HSP) regulation	Apoptosis	Gene and protein expression by JAK-STAT signaling after Interleukin-12 stimulation; Breakdown of the nuclear lamina; Initiation of Nuclear Envelope Reformation; Clearance of Nuclear Envelope Membranes from Chromatin; Meiotic synapsis; Depolymerisation of the Nuclear Lamina; Formation of Senescence-Associated Heterochromatin Foci (SAHF); Deregulated CDK5 triggers multiple neurodegenerative pathway…	34	3	1	0.966	0.988	0.940424	0.817412	0.915509	32.08	38.17	16.98	99.7	101.3	99	8.25	10.08	3.77	4.20823e+08	3.85716e+08	4.68396e+08	4.69871e+08	3.70346e+08	3.56415e+08	4.08815e+08	3.73108e+08	3.92908e+08	27	31	27
NP_005197.3	Adapter molecule crk isoform b [OS=Homo sapiens]	0	44.389	62	7	35	7	204	22.9	5.48	46.34	7	Pf00017, Pf00018, Pf07653, Pf14604	1398	CRK	17	ENSG00000167193.7	Integrin-mediated Cell Adhesion; B Cell Receptor Signaling Pathway; Kit receptor signaling pathway; Focal Adhesion; Signaling of Hepatocyte Growth Factor Receptor; Rac1/Pak1/p38/MMP-2 pathway; MAPK Signaling Pathway; VEGFA-VEGFR2 Signaling Pathway; Angiopoietin Like Protein 8 Regulatory Pathway; Chemokine signaling pathway; EGF/EGFR Signaling Pathway; Insulin Signaling; Regulation of Actin Cytosk…			16	0	1.101	0.959	0.958	0.884406	0.801912	0.845212	25.77	23.78	22.76	103	91.9	105.1	10.77	4.97	13.4	2.28e+07	1.85841e+07	1.74586e+07	1.91219e+07	1.52422e+07	1.65662e+07	1.57522e+07	1.97452e+07	1.94598e+07	6	7	5
CAA35621.1	Nm23 protein, partial [OS=Homo sapiens]	0	126.071	62	9	108	1	180	20.4	7.31	200.33	9	Pf00334	4830	NME1	17					0	0	1.525	0.103	0.07	0.0865843	1.62313e-16	1.7785e-16	21.81	23.56	29.03	23.2	15.2	261.6	12.77	23.41	14.47	1.20799e+07	8.66509e+06	9120219	8.73031e+06	5.36597e+06	5.37175e+06	1.08068e+08	100853414	7.92534e+07	1	1	1
EAW94269.1	proteasome (prosome, macropain) 26S subunit, ATPase, 5, isoform CRA_a [OS=Homo sapiens]	0	149.348	62	20	134	1	383	43	8.34	252.92	20	Pf00004, Pf00910, Pf01057, Pf01078, Pf05496, Pf06068, Pf06414, Pf07724, Pf07726, Pf07728, Pf13191, Pf13207, Pf13401	5705	PSMC5	17		Proteasome Degradation; Parkin-Ubiquitin Proteasomal System pathway			2	0	1.784	1.702	0.954	0.0274551	0.0525825	0.827094	60.41	30.64	60.41	139.6	78.3	82.1	15.96	80.8	25.66	4.66291e+06	5538246	5.80186e+06	507585	2.82543e+06	5042373	2.09032e+06	3418703	3.21562e+06	1	1	1
BAF83829.1	unnamed protein product [OS=Homo sapiens]	0	359.113	62	30	274	29	471	54.3	9.2	692.26	30	Pf00076, Pf08075, Pf13893, Pf14259	4841	NONO	X		mRNA Processing			1	1	1.049	1.184	1.155	0.952406	0.828033	0.719437	22.97	35.84	31.74	106.1	101.3	92.7	2.55	2.25	8.55	5.15294e+08	4.42181e+08	4.65242e+08	4.69161e+08	3.98789e+08	4.16683e+08	4.07512e+08	3.66606e+08	4.31893e+08	26	27	28
XP_011529261.1	PREDICTED: moesin isoform X1 [OS=Homo sapiens]	0	413.097	61	40	351	30	610	71.3	6.06	735.01	40	Pf00373, Pf00769, Pf09379, Pf09380	4478	MSN	X		AGE/RAGE pathway; Regulation of Actin Cytoskeleton			2	12	1.008	0.899	0.908	0.966759	0.628863	0.668973	30.03	35.62	29.09	93	100.6	106.4	3.7	0.79	9.68	8.74199e+08	7.08943e+08	7.96562e+08	8.52794e+08	7.3812e+08	7.9177e+08	9.93752e+08	8.05445e+08	8.59228e+08	37	36	35
NP_005991.1	tubulin alpha-4A chain isoform 1 [OS=Homo sapiens]	0	410.934	61	29	756	7	448	49.9	5.06	2317.08	29	Pf00091, Pf03953	7277	TUBA4A	2	ENSG00000127824.13	Pathogenic Escherichia coli infection; Parkin-Ubiquitin Proteasomal System pathway	Phagosome; Pathogenic Escherichia coli infection; Apoptosis; Gap junction	COPI-independent Golgi-to-ER retrograde traffic; COPI-dependent Golgi-to-ER retrograde traffic; Carboxyterminal post-translational modifications of tubulin; Regulation of PLK1 Activity at G2/M Transition; Recruitment of NuMA to mitotic centrosomes; Hedgehog 'off' state; Loss of Nlp from mitotic centrosomes; Translocation of GLUT4 to the plasma membrane; Prefoldin mediated transfer of substrate to…	76	0	1.016	1.083	0.966	0.968349	0.987276	0.873048	26.48	42.41	30.1	75.1	110.2	114.7	18.7	5.62	5.11	3.22165e+07	2.16769e+07	2.16013e+07	3.42678e+07	3.079e+07	2.92142e+07	3.58324e+07	3.17943e+07	3.39859e+07	6	6	6
AAI26185.1	Keratin 13 [OS=Homo sapiens]	0	217.133	61	24	261	16	458	49.6	4.96	691.54	24	Pf00038	3860	KRT13	17					0	5	0.937	0.715	0.755	0.679925	0.0801373	0.076919	46.32	38.33	30.23	76.2	94.5	129.3	19.95	29.15	24.24	1.86766e+08	2.20499e+08	2.65617e+08	1.74009e+08	2.58109e+08	2.92069e+08	2.61733e+08	3.86458e+08	4.1542e+08	19	18	20
CAA68286.1	unnamed protein product [OS=Homo sapiens]	0	424.923	61	42	326	42	673	75.8	5.6	762.5	42	Pf00191	309	ANXA6	5		Calcium Regulation in the Cardiac Cell; Prostaglandin Synthesis and Regulation			2	0	0.967	0.932	0.96	0.837126	0.740709	0.854458	28.17	29.08	30.78	93.1	95.5	111.4	1.97	11.27	13.54	5.83237e+08	4.90926e+08	5.37108e+08	6.21653e+08	4.36411e+08	5.06064e+08	7.34904e+08	6.10568e+08	5.48863e+08	37	36	37
NP_006657.1	ruvB-like 2 isoform 1 [OS=Homo sapiens]	0	170.736	61	24	142	24	463	51.1	5.64	268.87	24	Pf00004, Pf03796, Pf06068, Pf13481	10856	RUVBL2	19	ENSG00000183207.13			HATs acetylate histones; Telomere Extension By Telomerase	8	0	0.955	1.005	1.107	0.784281	0.903311	0.86391	20.1	31.54	26	94	106.7	99.2	7.91	5.97	6.38	1.68686e+08	1.4417e+08	1.81025e+08	1.83799e+08	1.57958e+08	1.52147e+08	1.62271e+08	1.60662e+08	1.76827e+08	22	23	23
AAB05662.1	Cu/Zn-superoxide dismutase [OS=Homo sapiens]	0	222.785	61	11	127	11	154	15.9	6.32	388.66	11	Pf00080	6647	SOD1	21		Selenium Micronutrient Network; Vitamin B12 Metabolism; Folate Metabolism; AGE/RAGE pathway; Dopamine metabolism; Amyotrophic lateral sclerosis (ALS); Oxidative Stress			7	0	1.149	1.098	0.922	0.568732	0.968436	0.719275	27.2	28.92	38.13	95.3	91.4	113.3	2.68	3.25	5.17	2.94007e+08	2.64644e+08	2.7285e+08	2.65029e+08	2.20793e+08	2.48164e+08	3.05431e+08	3.31985e+08	3.13107e+08	10	10	10
NP_060518.1	protein mago nashi homolog 2 isoform 1 [OS=Homo sapiens]	0	56.116	61	7	32	7	148	17.3	6.39	50.17	7	Pf02792	55110	MAGOHB	12	ENSG00000111196.9		mRNA surveillance pathway; Spliceosome; RNA transport	mRNA 3'-end processing; mRNA Splicing - Major Pathway; Cleavage of Growing Transcript in the Termination Region ; Regulation of expression of SLITs and ROBOs; Transport of Mature mRNA derived from an Intron-Containing Transcript; Nonsense Mediated Decay (NMD) enhanced by the Exon Junction Complex (EJC)	20	0	0.938	1.005	1.044	0.75395	0.903658	0.981047	30.54	26.72	29.36	97.4	111.3	91.3	3.42	7.25	3.89	4.19337e+07	3.75723e+07	3.81763e+07	4.50292e+07	3.98232e+07	3.68951e+07	3.61802e+07	3.41163e+07	3.66041e+07	5	6	5
BAG57447.1	unnamed protein product [OS=Homo sapiens]	0	199.36	61	15	134	0	227	25.4	10.99	439.26	15	Pf00573	6124	RPL4	15		Cytoplasmic Ribosomal Proteins			1	0
NP_060308.1	H/ACA ribonucleoprotein complex subunit 2 isoform a [OS=Homo sapiens]	0	48.008	61	5	17	5	153	17.2	8.22	51.91	5	Pf01248	55651	NHP2	5	ENSG00000145912.8		Ribosome biogenesis in eukaryotes	rRNA modification in the nucleus and cytosol; Telomere Extension By Telomerase	10	0	1.093	0.857	0.822	0.952102	0.466408	0.270645	47.48	27.33	42.05	105.1	94.3	100.6	9.13	24.6	18.97	8.66813e+06	6.34448e+06	7.29737e+06	8.4982e+06	5.68647e+06	4.8362e+06	8.32288e+06	5.59386e+06	6.58806e+06	3	3	3
NP_001123528.1	elongation factor 1-delta isoform 4 [OS=Homo sapiens]	0	144.278	61	13	115	1	257	28.5	4.92	259.97	13	Pf00736, Pf10587	1936	EEF1D	8; CHR_HSCHR8_3_CTG7	ENSG00000104529.17; ENSG00000273594.4	Translation Factors			1	0	0.905	5.164	6.005	0.756149	2.19299e-12	1.7785e-16	8.76	42.46	42.46	127.3	148	24.7	8.49	7.03	114.42	5797482	4399014	4751914	5.50972e+06	5.24371e+06	4.82521e+06	698221	880277	5.30141e+06	1	1	1
NP_036243.1	activator of 90 kDa heat shock protein ATPase homolog 1 isoform 1 [OS=Homo sapiens]	0	131.482	61	15	66	15	338	38.3	5.53	192.26	15	Pf08327, Pf09229	10598	AHSA1	14	ENSG00000100591.7	T-Cell antigen Receptor (TCR) pathway during Staphylococcus aureus infection			1	0	1.11	0.986	0.955	0.769519	0.865522	0.835755	29.79	23.41	23.42	95.5	94.3	110.3	17.5	17.92	10.57	1.14236e+08	7.31978e+07	8.28684e+07	1.03554e+08	6.48765e+07	7.51757e+07	9.27929e+07	9.53209e+07	7.69206e+07	15	12	14
NP_005989.3	T-complex protein 1 subunit gamma isoform a [OS=Homo sapiens]	0	282.593	60	31	277	2	545	60.5	6.49	658.17	31	Pf00118	7203	CCT3	1	ENSG00000163468.14			BBSome-mediated cargo-targeting to cilium; Prefoldin mediated transfer of substrate to CCT/TriC; Cooperation of PDCL (PhLP1) and TRiC/CCT in G-protein beta folding; Association of TriC/CCT with target proteins during biosynthesis; Formation of tubulin folding intermediates by CCT/TriC; Folding of actin by CCT/TriC	13	0	0.969	1.039	1.059	0.86162	0.963059	0.95638	19.31	15.95	15.85	97.4	104.6	98.1	7.42	1.34	9.09	4.11846e+07	3.85768e+07	4.53493e+07	4.40198e+07	3.91167e+07	4.19372e+07	3.54408e+07	41345077	3.98371e+07	2	2	2
AAH08019.1	chaperonin containing TCP1, subunit 3 (gamma) [OS=Homo sapiens]	0	254.41	60	31	253	2	544	60.4	6.49	576.68	31	Pf00118	7203	CCT3	1					0	29	1.011	0.98	0.991	0.974098	0.849243	0.922321	17.17	20.61	14.9	98.3	101.6	100.1	5.84	1.17	5.28	520588515	4.10805e+08	448109884	4.58685e+08	3.96839e+08	4.29575e+08	4.68332e+08	4.13143e+08	4.30116e+08	29	28	29
NP_110379.2	T-complex protein 1 subunit alpha isoform a [OS=Homo sapiens]	0	277.065	60	31	266	31	556	60.3	6.11	682.26	31	Pf00118	6950	TCP1	6	ENSG00000120438.11			BBSome-mediated cargo-targeting to cilium; Prefoldin mediated transfer of substrate to CCT/TriC; Gene and protein expression by JAK-STAT signaling after Interleukin-12 stimulation; Cooperation of PDCL (PhLP1) and TRiC/CCT in G-protein beta folding; Association of TriC/CCT with target proteins during biosynthesis; Folding of actin by CCT/TriC; Formation of tubulin folding intermediates by CCT/TriC…	18	0	0.995	0.989	0.977	0.916184	0.873578	0.889232	22.87	29.62	25.58	98.8	98.6	102.6	0.29	5.89	4.47	3.67524e+08	3.18995e+08	3.47872e+08	3.68618e+08	2.87826e+08	3.18691e+08	3.61271e+08	323997894	3.40542e+08	31	30	30
AAC39842.1	beta-filamin [OS=Homo sapiens]	0	1169.7	60	116	930	1	2602	278	5.74	2271.82	116	Pf00307, Pf00630	2317	FLNB	3		VEGFA-VEGFR2 Signaling Pathway			1	0	1.329	0.909	0.655	0.6045	0.667818	0.00568412	6.47	7.61	8.8	103.2	77.7	119.1	6.9	4.09	7.5	4.31796e+06	3.66082e+06	4.53247e+06	2.99296e+06	2838404	2.83353e+06	4.58794e+06	4.73971e+06	4.05145e+06	1	1	1
CAG33110.1	PpiB [OS=Homo sapiens]	0	128.47	60	15	115	15	216	23.7	9.41	166.1	15	Pf00160	5479	PPIB	15		Prolactin Signaling Pathway			1	0	1.107	1.28	1.208	0.762888	0.622588	0.551656	39.53	34.32	31.04	108.8	106.3	84.9	4.57	6.5	5.88	1.57696e+08	1.31806e+08	1.36645e+08	1.51967e+08	1.17777e+08	1.28628e+08	1.04664e+08	1.14947e+08	1.05555e+08	14	14	14
NP_001951.2	elongation factor 1-delta isoform 2 [OS=Homo sapiens]	0	167.395	60	14	136	2	281	31.1	5.01	317.86	14	Pf00736, Pf10587	1936	EEF1D	8; CHR_HSCHR8_3_CTG7	ENSG00000104529.17; ENSG00000273594.4	Translation Factors	Herpes simplex infection	Eukaryotic Translation Elongation	5	13	0.984	1.029	1.061	0.884406	0.946225	0.94988	17.79	22.38	16.26	110.6	106.9	82.5	5.04	6.21	11.37	4.50286e+08	3.58025e+08	3.96098e+08	4.18404e+08	3.32373e+08	3.47119e+08	2.86597e+08	2.63284e+08	3.24789e+08	14	14	14
BAG58909.1	unnamed protein product [OS=Homo sapiens]	0	64.099	60	7	41	7	120	13.3	8.91	116.54	7	Pf01423	6634	SNRPD3	22	ENSG00000100028.11	mRNA Processing			1	0	0.896	1.019	1.058	0.543072	0.926451	0.959654	33.96	29.24	26.35	100.5	99.7	99.8	2.58	5.06	4.89	5.81188e+07	5.07129e+07	5.27393e+07	5.87159e+07	4.75148e+07	4.96967e+07	5.40583e+07	5.20348e+07	4.79002e+07	6	6	5
AAI21795.1	valosin-containing protein [OS=Homo sapiens]	0	507.316	60	47	416	47	806	89.3	5.33	1274.17	47	Pf00004, Pf00910, Pf01057, Pf01078, Pf02359, Pf02933, Pf05496, Pf05673, Pf06068, Pf07724, Pf07726, Pf07728, Pf09336, Pf13191, Pf13207, Pf13401	7415	VCP	9					0	0	1.006	0.969	0.97	0.959365	0.825772	0.883272	24.82	27.85	25.91	106.8	102.6	90.7	5.43	1.49	4.78	6.58379e+08	6.37924e+08	6.78972e+08	6.57048e+08	5.66461e+08	5.91595e+08	5.25652e+08	5.66473e+08	5.43733e+08	45	43	42
BAG64197.1	unnamed protein product [OS=Homo sapiens]	0	247.733	60	24	227	2	507	56	5.94	551.57	24	Pf00118	22948	CCT5	5					0	21	1.107	1.191	1.056	0.763306	0.813751	0.961748	20.35	22.73	22.05	112.3	102	85.6	3.55	6.9	5.88	5.08156e+08	4.17204e+08	4.54261e+08	4.59229e+08	3.58376e+08	3.78568e+08	3.35723e+08	3.19093e+08	3.5449e+08	22	23	21
XP_016880250.1	PREDICTED: profilin-1 isoform X1 [OS=Homo sapiens]	0	188.587	60	11	505	4	181	19.6	7.12	1409.55	11	Pf00235	5216	PFN1	17		VEGFA-VEGFR2 Signaling Pathway; Regulation of Actin Cytoskeleton; G13 Signaling Pathway			3	0	1.135	1.083	0.955	0.629654	0.98686	0.83525	33	26.25	17.44	82.5	111	106.5	19.74	9.47	4.29	3.68337e+08	2.2998e+08	2.54745e+08	3.48836e+08	2.97596e+08	2.70043e+08	3.18542e+08	2.97205e+08	3.21476e+08	3	3	3
NP_056456.1	testin isoform 1 [OS=Homo sapiens]	0	186.789	60	18	145	18	421	48	7.68	320.88	18	Pf00412, Pf06297	26136	TES	7	ENSG00000135269.17				0	0	0.995	1.015	0.986	0.920468	0.917292	0.910293	27	38.94	31.73	110.1	101.5	88.4	9.76	21.44	25.06	1.97607e+08	1.52738e+08	1.55066e+08	1.99865e+08	1.33035e+08	1.23113e+08	1.8257e+08	1.26814e+08	1.11727e+08	14	15	15
NP_004069.1	cysteine and glycine-rich protein 1 isoform 1 [OS=Homo sapiens]	0	66.382	60	7	48	7	193	20.6	8.57	123.02	7	Pf00412	1465	CSRP1	1	ENSG00000159176.13	Mecp2 and Associated Rett Syndrome		MTF1 activates gene expression	4	0	0.914	0.793	0.86	0.654662	0.249655	0.445349	19.03	13.76	17.38	90.2	105.2	104.6	9.31	9.73	20.28	3.81697e+07	3.23729e+07	3.03266e+07	4.06742e+07	3.80417e+07	3.31292e+07	4.80451e+07	3.88062e+07	3.10236e+07	7	6	6
ACR14812.1	RPL27/NME2 fusion protein, partial [OS=Homo sapiens]	0	89.729	60	9	82	9	126	14.2	10.46	91.38	9	Pf00467, Pf01777								0	0	0.98	0.951	0.937	0.876159	0.793816	0.772801	21.1	20.95	18.22	94.2	98.6	107.2	10.24	2.8	4.32	3.22896e+08	2.33629e+08	2.62947e+08	2.85337e+08	2.39061e+08	2.51705e+08	2.99962e+08	2.69689e+08	2.82104e+08	8	9	9
NP_001611.1	Neuroblast differentiation-associated protein AHNAK isoform 1 [OS=Homo sapiens]	0	1481.45	59	172	997	172	5890	628.7	6.15	2504.85	172		79026	AHNAK	11	ENSG00000124942.13				0	0	1.232	0.994	0.812	0.167551	0.887204	0.231703	25.35	22.94	20.87	107.4	87.5	105.1	2.87	3.53	2.43	1.28037e+09	1.1838e+09	1.25008e+09	9.70255e+08	8.84346e+08	9.65706e+08	1.22927e+09	1.15045e+09	1.15418e+09	153	155	153
BAG70074.1	14-3-3 protein beta/alpha [OS=Homo sapiens]	0	175.059	59	18	185	12	246	28.1	4.83	311.94	18	Pf00244	7529	YWHAB	20		Cell Cycle; IL-3 Signaling Pathway; Myometrial Relaxation and Contraction Pathways; Calcium Regulation in the Cardiac Cell; Sudden Infant Death Syndrome (SIDS) Susceptibility Pathways			5	3	1.015	1.007	0.991	0.985412	0.905161	0.919892	35.49	26.71	27.95	111.4	99.9	88.7	2.44	7	5.06	6.99215e+08	5.99773e+08	6.32541e+08	6.13277e+08	5.07789e+08	4.94447e+08	5.30127e+08	4.93301e+08	4.66089e+08	14	15	15
AAH15130.1	Cytochrome c, somatic [OS=Homo sapiens]	0	58.071	59	9	58	9	105	11.8	9.63	112.65	9	Pf00034, Pf14495	54205	CYCS	7		AGE/RAGE pathway; Parkinsons Disease Pathway; Apoptosis; Fas Ligand (FasL) pathway and Stress induction of Heat Shock Proteins (HSP) regulation; Apoptosis Modulation by HSP70			5	0	1.205	1.412	1.208	0.264367	0.315456	0.552794	37.75	31.19	31.35	118.6	96.7	84.6	2.86	21.31	9.15	1.13713e+08	9.50606e+07	1.09186e+08	1.20411e+08	7.24952e+07	8.08426e+07	8.31902e+07	6.80648e+07	7.26517e+07	9	9	9
NP_005745.1	Ras GTPase-activating protein-binding protein 1 [OS=Homo sapiens]	0	205.687	59	19	202	2	466	52.1	5.52	395.92	19	Pf00076, Pf02136, Pf13893, Pf14259	10146	G3BP1	5	ENSG00000145907.14				0	16	0.988	1.271	1.233	0.896914	0.647681	0.4702	31.39	37.36	32.12	109.2	110.8	80	11.63	13.49	6.45	4.21878e+08	2.92241e+08	3.52778e+08	4.26633e+08	3.10976e+08	3.06626e+08	2.50793e+08	2.32491e+08	2.62362e+08	16	18	18
NP_001616.1	adenylate kinase 2, mitochondrial isoform a [OS=Homo sapiens]	0	69.234	59	10	50	10	239	26.5	7.81	92.91	10	Pf00406, Pf05191, Pf13207, Pf13671	204	AK2	1	ENSG00000004455.16		Metabolic pathways; Thiamine metabolism; Purine metabolism	Interconversion of nucleotide di- and triphosphates	6	0	0.958	0.885	0.97	0.839147	0.575611	0.883272	27.94	33.27	32.44	95.2	101.3	103.4	17.46	20.64	9.18	5.97543e+07	3.73495e+07	4.52401e+07	6.38148e+07	3.82821e+07	4.42089e+07	5.53144e+07	4.66824e+07	4.58389e+07	9	9	9
NP_005959.2	Heterogeneous nuclear ribonucleoprotein M isoform a [OS=Homo sapiens]	0	261.097	59	32	231	3	730	77.5	8.7	514.12	32	Pf00076, Pf11532, Pf11608, Pf13893, Pf14259	4670	HNRNPM	19	ENSG00000099783.11	mRNA Processing	Spliceosome	mRNA Splicing - Major Pathway; FGFR2 alternative splicing	11	29	1.046	1.101	1.035	0.96457	0.967812	0.997406	23.35	25.7	19.99	101.4	102.6	96	1.08	2.55	4.11	4.44363e+08	3.82385e+08	4.24786e+08	4.22682e+08	3.70702e+08	3.74941e+08	3.88544e+08	3.79337e+08	3.51049e+08	30	31	31
NP_001138303.1	Prohibitin-2 isoform 1 [OS=Homo sapiens]	0	154.83	59	16	153	16	299	33.3	9.83	254.16	16	Pf01145	11331	PHB2	12	ENSG00000215021.8			Processing of SMDT1	3	0	0.91	1.126	1.25	0.519916	0.929691	0.413136	23.52	23.8	25.74	103.2	111.1	85.7	7.39	11.28	6.32	4.42408e+08	3.38997e+08	3.72557e+08	4.59422e+08	3.4836e+08	3.42586e+08	3.13759e+08	2.71149e+08	2.91993e+08	16	16	16
AAF13605.1	BiP protein, partial [OS=Homo sapiens]	0	485.929	59	40	590	1	639	70.9	5.35	1504.02	40	Pf00012, Pf01968, Pf06723	3309	HSPA5	9		Parkin-Ubiquitin Proteasomal System pathway; Apoptosis-related network due to altered Notch3 in ovarian cancer; Photodynamic therapy-induced unfolded protein response; MAPK Signaling Pathway			4	0	1.049	0.119	0.112	0.99773	3.42367e-10	1.7785e-16	21.02	55.34	54.68	29.1	27.2	243.7	23.86	16.78	98.99	44410.3	29179.7	51709.8		30462.8	40886.1	342778	1.35383e+06	208993	1	1	1
XP_005272536.1	PREDICTED: heterogeneous nuclear ribonucleoprotein M isoform X2 [OS=Homo sapiens]	0	248.234	59	30	215	1	712	75.6	8.57	499.68	30	Pf00076, Pf11532, Pf11608, Pf13893, Pf14259	4670	HNRNPM	19		mRNA Processing			1	0	0.994	1.217	1.228	0.936179	0.772508	0.490279	13.18	14.49	7.49	107.9	103.4	88.7	13.18	6.97	5.72	5207428	5873829	6.11057e+06	5796196	5579474	5158067	4.93518e+06	4.77129e+06	4.31464e+06	1	1	1
AAH00408.1	ACAT2 protein [OS=Homo sapiens]	0	163.804	59	13	81	13	397	41.4	6.92	308.3	13	Pf00108, Pf00109, Pf02803	39	ACAT2	6					0	0	0.924	1.034	1.164	0.679639	0.955136	0.700026	27.64	31.53	28.73	97.7	108.3	94	6.52	5.01	7.6	4.81947e+07	4.65877e+07	5.18258e+07	5.52442e+07	4.87626e+07	5.59881e+07	4.1989e+07	4.76224e+07	45986067	11	12	12
NP_001157789.1	Filamin-B isoform 1 [OS=Homo sapiens]	0	1154.4	59	116	928	1	2633	281.5	5.71	2244.64	116	Pf00307, Pf00630	2317	FLNB	3	ENSG00000136068.14	VEGFA-VEGFR2 Signaling Pathway			1	110	1.116	0.907	0.802	0.720816	0.656837	0.197651	29.22	30.35	27.16	99.1	93.1	107.8	13.28	11.73	3.73	1.30503e+09	1.41898e+09	1.59978e+09	1.19775e+09	1.25936e+09	1.39766e+09	1.53741e+09	1.59569e+09	1.60577e+09	101	109	107
BAA11338.1	proteasome subunit p42 [OS=Homo sapiens]	0	159.489	59	19	122	19	389	44.1	7.49	296.21	19	Pf00004, Pf00910, Pf01078, Pf05496, Pf07724, Pf07726, Pf07728, Pf13191, Pf13207, Pf13401	5706	PSMC6	14		Proteasome Degradation; Parkin-Ubiquitin Proteasomal System pathway			2	0	1.069	1.12	1.045	0.886728	0.941066	0.981047	16.77	38.71	30.64	111.5	100.3	88.2	4.26	1.7	6.9	1.29654e+08	1.22102e+08	1.32491e+08	1.15468e+08	1.04718e+08	1.09522e+08	1.01642e+08	1.10684e+08	9.67854e+07	18	18	18
NP_006363.4	Heterogeneous nuclear ribonucleoprotein Q isoform 1 [OS=Homo sapiens]	0	332.412	59	29	259	9	623	69.6	8.59	701.97	29	Pf00076, Pf13893, Pf14259	10492	SYNCRIP	6	ENSG00000135316.17				0	20	1.037	0.95	0.976	0.985751	0.787659	0.888317	40.53	39.96	28.18	96.3	101.8	101.9	3.48	5.6	4.62	3.65965e+08	3.02409e+08	3.51067e+08	3.63968e+08	2.95051e+08	3.48295e+08	3.49765e+08	3.497e+08	3.71329e+08	27	29	28
CAG38772.1	G3BP [OS=Homo sapiens]	0	179.925	59	18	196	1	466	52.1	5.59	366.66	18	Pf00076, Pf02136, Pf13893, Pf14259	10146	G3BP1	5					0	0	0.108	2.317	20.2	2.97569e-16	0.147183	1.7785e-16	25.51	3.63	27.15	29.6	257.7	12.8	9.12	25.48		475805	482013	537065		3.3086e+06	5036562	219356			1	1	1
NP_001650.1	ADP-ribosylation factor 3 [OS=Homo sapiens]	0	97.943	59	9	68	5	181	20.6	7.43	207.3	9	Pf00025, Pf00071, Pf00503, Pf01926, Pf04670, Pf08477, Pf09439	377	ARF3	12	ENSG00000134287.9		Endocytosis	Synthesis of PIPs at the Golgi membrane; COPI-dependent Golgi-to-ER retrograde traffic; COPI-mediated anterograde transport	17	3	1.045	0.912	0.857	0.966759	0.678401	0.432952	29.94	42.96	43.65	109.9	94.2	95.9	0.53	12.08	11.77	1.97144e+08	1.7347e+08	1.89075e+08	1.95246e+08	1.40425e+08	1.4721e+08	1.74652e+08	1.56291e+08	1.34059e+08	8	6	7
CAA59127.1	ribosomal protein S15A [OS=Homo sapiens]	0	76.669	58	9	76	1	130	14.8	10.13	153.09	9	Pf00410	6210	RPS15A	16		Cytoplasmic Ribosomal Proteins			1	0	0.547	0.633	1.126	0.000756256	0.0126211	0.805284	41.58	13.41	34.82	69.7	122	108.3	19.44	32.29	8.48	3.48939e+06	4.49489e+06	4.52392e+06	5.99682e+06	9.93683e+06	7.26908e+06	6330140	6.67817e+06	7.28851e+06	1	1	1
CAG33215.1	PDCD5 [OS=Homo sapiens]	0	71.966	58	8	66	8	125	14.3	7.4	116.63	8	Pf01984	9141	PDCD5	19					0	0	1.047	1.101	1.01	0.959201	0.967855	0.96441	17.76	19.58	13.24	103.4	102	94.6	9.38	4.23	5.83	1.36659e+08	1.01877e+08	1.10653e+08	1.08207e+08	8.81015e+07	1.00343e+08	9.4113e+07	9.63384e+07	1.02701e+08	7	7	6
EAW62274.1	S-phase kinase-associated protein 1A (p19A), isoform CRA_d [OS=Homo sapiens]	0	41.92	58	5	29	5	168	19.2	4.56	66.09	5	Pf01466, Pf03931	6500	SKP1	5		TNF alpha Signaling Pathway; TGF-beta Signaling Pathway; Notch Signaling Pathway			3	0	1.129	1.554	1.279	0.826021	0.123486	0.318864	25.86	50.87	24.04	107.1	99.2	93.7	7.51	17.1	8.61	4.32454e+07	3.39044e+07	3.56309e+07	4.15387e+07	2.6088e+07	3.13692e+07	3.34975e+07	2.76211e+07	3.04371e+07	4	5	4
XP_011526370.1	PREDICTED: peptidyl-prolyl cis-trans isomerase NIMA-interacting 1 isoform X1 [OS=Homo sapiens]	0	31.778	58	5	10	5	168	18.8	8.84	23.77	5	Pf00397, Pf00639, Pf13145, Pf13616	5300	PIN1	19					0	0	1.007	1.003	0.987	0.952006	0.899032	0.912404	31.64	29.94	22.93	103.7	88.8	107.5	47.85	10.83	9.88	2.88973e+06	7.46579e+06	7.30839e+06	7.18143e+06	5.43427e+06	5.41885e+06	6.6041e+06	7.89193e+06	7.14368e+06	3	4	4
NP_006397.1	peroxiredoxin-4 precursor [OS=Homo sapiens]	0	96.066	58	10	70	8	271	30.5	6.29	135.56	10	Pf00578, Pf08534, Pf10417	10549	PRDX4	X	ENSG00000123131.12	Selenium Micronutrient Network		Neutrophil degranulation	4	0	1.023	0.915	0.948	0.985751	0.68574	0.813461	42.44	37.47	18.71	96.8	99.2	104	19.36	18.11	7.79	3.59444e+07	2.3224e+07	2.43447e+07	32158764	1.98726e+07	2.37834e+07	2.89883e+07	2.43947e+07	25592267	7	7	8
BAA07919.1	26S proteasome subunit P45 [OS=Homo sapiens]	0	162.49	58	20	143	1	406	45.6	8.18	285.85	20	Pf00004, Pf00910, Pf01057, Pf01078, Pf05496, Pf06068, Pf06414, Pf07724, Pf07726, Pf07728, Pf13191, Pf13207, Pf13401	5705	PSMC5	17		Proteasome Degradation; Parkin-Ubiquitin Proteasomal System pathway			2	18	1.061	1.085	1.042	0.915175	0.98381	0.985052	20.7	24.64	21.92	103.3	102.1	94.7	10.21	5.73	11.46	9.1096e+07	9.17782e+07	1.05936e+08	9.77165e+07	8.54395e+07	9.97804e+07	8.87364e+07	8.58764e+07	1.03993e+08	17	18	18
BAD92402.1	ribosomal protein S10 variant, partial [OS=Homo sapiens]	0	76.642	58	10	71	1	174	19.8	9.91	138.19	10	Pf03501	6204	RPS10	6		Cytoplasmic Ribosomal Proteins			1	0	0.694	0.841	1.208	0.0548811	0.411652	0.551373	28.63	8.26	28.63	82.6	119	98.5	6.83	24.78	9.92	5.68423e+06	5.44648e+06	6.17748e+06	6.82055e+06	9771578	7.84009e+06	6.84949e+06	5.75453e+06	6.92435e+06	1	1	1
NP_003786.1	sorting nexin-3 isoform a [OS=Homo sapiens]	0	31.155	58	9	43	8	162	18.8	8.66	61.45	9	Pf00787	8724	SNX3	6	ENSG00000112335.14		Endocytosis	WNT ligand biogenesis and trafficking; Ub-specific processing proteases	8	1	0.964	1.219	1.18	0.833437	0.768555	0.647438	13.61	31.9	25.85	98.5	112.3	89.1	8.98	3.99	2.82	7.27812e+07	5.35575e+07	6.10272e+07	7.25988e+07	6.04525e+07	6.2295e+07	5.60325e+07	52186902	5.20917e+07	7	7	7
BAG57331.1	unnamed protein product [OS=Homo sapiens]	0	149.988	58	14	128	2	183	20.1	8.78	339.69	14	Pf00578, Pf08534, Pf13905	7001	PRDX2	19		Selenium Micronutrient Network			1	11	1.026	1.132	1.065	0.99996	0.917292	0.944831	30.37	40.26	27.83	100.7	100.6	98.6	1.5	6.25	3.63	2.14738e+08	1.92811e+08	2.08688e+08	2.29572e+08	1.81105e+08	1.91353e+08	1.89481e+08	1.9413e+08	1.98171e+08	13	11	12
NP_001677.2	ATP synthase subunit beta, mitochondrial precursor [OS=Homo sapiens]	0	278.616	58	23	250	23	529	56.5	5.4	798.88	23	Pf00006, Pf00306, Pf02874	506	ATP5B	12	ENSG00000110955.8	Electron Transport Chain; Oxidative phosphorylation	Alzheimer's disease; Metabolic pathways; Parkinson's disease; Oxidative phosphorylation; Huntington's disease	Transcriptional activation of mitochondrial biogenesis; Cristae formation; Mitochondrial protein import; Formation of ATP by chemiosmotic coupling; Metabolism of proteins	17	0	1.026	1.133	1.128	0.99996	0.917268	0.802083	23.44	24.48	21.51	105.6	106.1	88.2	3.03	7.15	5.24	4.90869e+08	4.0782e+08	4.41528e+08	4.59423e+08	3.50028e+08	4.0946e+08	3.4025e+08	3.70336e+08	3.49538e+08	22	22	21
NP_001027459.1	Ubiquitin-conjugating enzyme E2 variant 1 isoform d [OS=Homo sapiens]	0	49.099	58	6	41	4	147	16.5	7.93	112.44	6	Pf00179	7335; 387522	UBE2V1; TMEM189-UBE2V1	20	ENSG00000244687.11	IL-1 signaling pathway; Interleukin-1 Induced Activation of NF-kappa-B; Simplified Depiction of MYD88 Distinct Input-Output Pathway		IRAK1 recruits IKK complex upon TLR7/8 or 9 stimulation; Downstream TCR signaling; NOD1/2 Signaling Pathway; IKK complex recruitment mediated by RIP1; TICAM1, RIP1-mediated IKK complex recruitment ; TAK1 activates NFkB by phosphorylation and activation of IKKs complex; Antigen processing: Ubiquitination & Proteasome degradation; FCERI mediated NF-kB activation; Activated TLR4 signalling; Interleu…	46	2	1.091	1.05	0.988	0.869879	0.972049	0.914472	13.14	15.49	24.5	115	103.2	81.8	5.06	1.49	8.07	6.14521e+07	5.63624e+07	5.5396e+07	5.18807e+07	4.60144e+07	4.72435e+07	4.0227e+07	3.85999e+07	4.43599e+07	6	6	6
CAA50685.1	IEF SSP 9306 [OS=Homo sapiens]	0	99.644	58	13	75	11	410	46.1	5.07	188.87	13	Pf00400, Pf12265	5928	RBBP4	1	ENSG00000162521.18	Retinoblastoma (RB) in Cancer; Interactome of polycomb repressive complex 2 (PRC2)			2	2	1.259	1.429	1.18	0.203845	0.282928	0.648177	28.32	30.57	23.72	114.3	99.1	86.6	3.24	7.56	6.53	7.08972e+07	6.33743e+07	7.1752e+07	5.39439e+07	5.18904e+07	5.82068e+07	4.67808e+07	4.96287e+07	5.18627e+07	11	12	11
NP_004037.1	ATP synthase subunit alpha, mitochondrial isoform a precursor [OS=Homo sapiens]	0	259.196	58	28	218	28	553	59.7	9.13	580.67	28	Pf00006, Pf00306, Pf02663, Pf02874, Pf05943	498	ATP5A1	18	ENSG00000152234.15	Electron Transport Chain; Oxidative phosphorylation	Oxidative phosphorylation; Huntington's disease; Alzheimer's disease; Metabolic pathways; Parkinson's disease	Cristae formation; Mitochondrial protein import; Formation of ATP by chemiosmotic coupling; Metabolism of proteins	16	0	0.902	1.054	1.173	0.458624	0.977891	0.67308	19.71	21.78	21.22	99.1	105.1	95.9	6.87	10.48	3.8	5.08496e+08	3.88371e+08	4.41752e+08	5.53099e+08	4.06902e+08	4.29522e+08	3.96144e+08	4.06227e+08	4.15783e+08	26	23	24
BAF83082.1	unnamed protein product [OS=Homo sapiens]	0	260.719	58	23	227	1	541	59.7	5.52	601.3	23	Pf00118	22948	CCT5	5					0	0	1.141	1.771	1.254	0.818406	0.0195387	0.398399	30.19	31.16	45.21	114.2	110.7	75.1	24.88	9.99	11.92	18534990	1.41345e+07	24516362	1.42937e+07	1.5121e+07	1.56815e+07	9519560	1.18422e+07	1.09185e+07	1	2	2
AAC99402.1	proteasome subunit HSPC [OS=Homo sapiens]	0	106.884	58	12	86	12	248	27.9	8.46	228.2	12	Pf00227, Pf10584	5688	PSMA7	20		Proteasome Degradation			1	0	0.952	1.021	1.042	0.769251	0.932803	0.984762	22.77	20.01	15.71	99.5	103.7	96.8	0.65	1.11	1.61	1.2456e+08	1.10004e+08	1.1956e+08	1.2288e+08	1.08282e+08	1.16396e+08	1.13668e+08	1.07989e+08	1.09734e+08	12	11	11
NP_000684.2	aldehyde dehydrogenase family 1 member A3 isoform 1 [OS=Homo sapiens]	0	212.607	58	22	160	22	512	56.1	7.25	365.39	22	Pf00171	220	ALDH1A3	15	ENSG00000184254.16	Vitamin A and Carotenoid Metabolism	Metabolism of xenobiotics by cytochrome P450; Tyrosine metabolism; Metabolic pathways; Chemical carcinogenesis; beta-Alanine metabolism; Phenylalanine metabolism; Drug metabolism - cytochrome P450; Histidine metabolism; Glycolysis / Gluconeogenesis	RA biosynthesis pathway	14	0	0.582	0.835	1.447	1.01724e-10	0.387906	0.0474398	41.21	42.97	37.4	64.1	134.8	101.1	21.69	29.9	15.43	9.83439e+07	1.3357e+08	1.29784e+08	1.59846e+08	2.36995e+08	2.74658e+08	1.51098e+08	1.97799e+08	1.93066e+08	20	18	18
BAD97029.1	ribosomal protein L10 variant, partial [OS=Homo sapiens]	0	154.998	57	16	124	16	214	24.5	10.08	314.61	16	Pf00252	6134	RPL10	X		Cytoplasmic Ribosomal Proteins			1	0	1.015	1.244	1.18	0.985751	0.712273	0.64806	33.6	36.07	35.08	93.4	100.1	106.5	1.24	7.89	3.4	2.36613e+08	2.03483e+08	2.19198e+08	2.35002e+08	1.89738e+08	2.35036e+08	2.46136e+08	2.26696e+08	2.38096e+08	13	14	14
EAW70571.1	ribosomal protein L37a, isoform CRA_c [OS=Homo sapiens]	0	31.714	57	4	35	4	68	7.6	10.01	39.76	4	Pf01780	6168	RPL37A	2	ENSG00000197756.9	Cytoplasmic Ribosomal Proteins			1	0	1.082	1.111	1.083	0.857395	0.955136	0.904632	32.54	35.16	21.84	109.6	99.7	90.7	16.35	4	8.29	1.49882e+08	1.08068e+08	103205716	1.09125e+08	9.28644e+07	93459025	1.07356e+08	9.24487e+07	8.99136e+07	4	4	4
NP_001268658.1	dynein light chain roadblock-type 1 isoform c [OS=Homo sapiens]	0	32.826	57	4	33	1	103	11.8	9.38	92.11	4	Pf03259	83658	DYNLRB1	20					0	0	0.51	2.131	4.179	0.0769637	0.227579	5.19669e-08	57.64	95	138.87	87.5	171.5	41	51.25		96.68	690395	282095		870887			88450.5	461278		1	1
NP_055070.1	protein canopy homolog 2 isoform 1 precursor [OS=Homo sapiens]	0	83.772	57	8	52	8	182	20.6	4.92	135.89	8	Pf11938	10330	CNPY2	12	ENSG00000257727.5				0	0	1.165	0.961	0.844	0.738936	0.802897	0.368407	20.18	29.8	26.98	107.1	90.4	102.6	3.48	7.33	9.16	3.58215e+07	2.99747e+07	3.17548e+07	2.98008e+07	2.26314e+07	2.52787e+07	3.02843e+07	3.43897e+07	2.90422e+07	5	5	5
AAK07520.1	PNAS-18 [OS=Homo sapiens]	0	13.963	57	2	6	2	63	7.6	10.43	13.05	2	Pf01111	1163	CKS1B	1	ENSG00000173207.12				0	0	1.827	3.506	2.091	0.00273972	2.47383e-11	7.44492e-07	45.87	37.95	45.62	157.3	92.5	50.2	26.44	13.59	4.82	1.62679e+07	9.1839e+06	1.00646e+07	5.83825e+06	5.14384e+06	6.81396e+06	3.00355e+06	3.05132e+06	3.21333e+06	2	2	2
AAH98112.1	HIST2H2BE protein [OS=Homo sapiens]	0	89.855	57	10	409	3	126	13.9	10.32	442.39	10	Pf00125, Pf00808	8349	HIST2H2BE	1					0	0	0.931	0.847	0.915	0.653194	0.428524	0.697414	11.8	12.44	12.85	90.7	100.1	109.2	3.52	6.45	6.24	2.01928e+08	1.89076e+08	2.00208e+08	2.08755e+08	207771824	202830706	2.11959e+08	229011461	2.32292e+08	3	3	3
NP_006077.2	tubulin beta-3 chain isoform 1 [OS=Homo sapiens]	0	370.81	57	24	514	6	450	50.4	4.93	1231.59	24	Pf00091, Pf03953, Pf10644	10381	TUBB3	16	ENSG00000258947.6	Pathogenic Escherichia coli infection; Parkin-Ubiquitin Proteasomal System pathway; Exercise-induced Circadian Regulation	Gap junction; Phagosome; Pathogenic Escherichia coli infection	COPI-independent Golgi-to-ER retrograde traffic; COPI-dependent Golgi-to-ER retrograde traffic; Carboxyterminal post-translational modifications of tubulin; Recruitment of NuMA to mitotic centrosomes; Hedgehog 'off' state; Translocation of GLUT4 to the plasma membrane; Prefoldin mediated transfer of substrate to CCT/TriC; Microtubule-dependent trafficking of connexons from Golgi to the plasma mem…	66	2	1.217	1.174	0.979	0.467417	0.847225	0.895642	43.79	28.79	32.68	120	92.4	87.6	7.29	6.53	22.06	5.12451e+07	3.87792e+07	4.44614e+07	3.37134e+07	29729248	3.50369e+07	2.74807e+07	3.08461e+07	4.07072e+07	7	7	7
AAP97261.1	Heparin-binding protein HBp15 [OS=Homo sapiens]	0	55.598	57	7	42	7	128	14.8	9.32	98.86	7	Pf01776								0	0	0.937	1.097	1.136	0.679621	0.968651	0.78009	17.91	15.55	14.87	100.8	106.5	92.8	4.74	4.67	7.28	2.72442e+08	2.36554e+08	2.37377e+08	2.69151e+08	2.5121e+08	2.42664e+08	2.3005e+08	1.97992e+08	2.23398e+08	7	7	6
AAH66320.1	ribosomal protein L13 [OS=Homo sapiens]	0	154.687	57	18	166	18	211	24.3	11.65	294.45	18	Pf01294	6137	RPL13	16		Cytoplasmic Ribosomal Proteins			1	0	0.956	1.127	1.168	0.788899	0.927159	0.684801	22	31.34	26.03	103.2	103.9	92.9	5.15	6.7	6.06	6.76525e+08	6.34334e+08	6.24916e+08	6.40041e+08	6.08045e+08	5.63347e+08	5.7941e+08	5.04108e+08	5.45167e+08	17	17	17
AAH16736.1	HNRPF protein [OS=Homo sapiens]	0	144.61	57	15	110	13	415	45.7	5.58	230.36	15	Pf00076, Pf08080, Pf14259	3185	HNRNPF	10					0	0	1.011	0.953	1.003	0.972412	0.795319	0.94838	22.55	31.61	30.21	100.1	101.5	98.4	5.09	5.94	4.15	2.08836e+08	1.8788e+08	2.1881e+08	2.19676e+08	1.71251e+08	1.90236e+08	1.94933e+08	177574323	1.8955e+08	12	12	12
NP_000010.1	acetyl-CoA acetyltransferase, mitochondrial precursor [OS=Homo sapiens]	0	149.193	57	17	79	17	427	45.2	8.85	253.26	17	Pf00108, Pf00109, Pf02803	38	ACAT1	11	ENSG00000075239.13	Fatty Acid Beta Oxidation; Synthesis and Degradation of Ketone Bodies; Tryptophan metabolism	Glyoxylate and dicarboxylate metabolism; Synthesis and degradation of ketone bodies; Carbon metabolism; Butanoate metabolism; Valine, leucine and isoleucine degradation; Metabolic pathways; Pyruvate metabolism; Propanoate metabolism; Fatty acid metabolism; Tryptophan metabolism; Terpenoid backbone biosynthesis; Lysine degradation; Fatty acid degradation	Synthesis of Ketone Bodies; Branched-chain amino acid catabolism; Utilization of Ketone Bodies	23	0	0.977	1.1	1.129	0.881607	0.968415	0.799982	36.17	26.82	25.31	93.2	107.4	99.4	14.3	10.7	5.05	5.48063e+07	38090184	4.05716e+07	5.24379e+07	4.1476e+07	3.92433e+07	4.4505e+07	3.94408e+07	4.16975e+07	14	13	13
NP_002145.3	Heat shock 70 kDa protein 4 [OS=Homo sapiens]	0	475.351	57	43	335	40	840	94.3	5.19	900.76	43	Pf00012, Pf06723	3308	HSPA4	5	ENSG00000170606.14	Parkin-Ubiquitin Proteasomal System pathway	Antigen processing and presentation	Regulation of HSF1-mediated heat shock response	6	0	1.041	0.966	0.963	0.97662	0.81775	0.865051	21.98	31.08	24.37	98.3	100.2	101.6	1.83	2.18	2.88	3.56375e+08	3.01558e+08	3.27725e+08	3.36011e+08	2.90288e+08	2.98496e+08	3.29645e+08	3.22066e+08	3.04526e+08	38	38	36
AAA86443.1	glycyl-tRNA synthetase [OS=Homo sapiens]	0	268.374	57	28	178	1	685	77.5	6.24	430.22	28	Pf00458, Pf00587, Pf03129	2617	GARS	7					0	0	0.741	0.877	1.392	0.288107	0.55735	0.097041	23.26	23.85	45.32	87.7	112.2	100	9.56	22.7	84.11	4.97016e+06	3.85693e+06	3.91323e+06	7.65588e+06	4.6619e+06	4.84884e+06	5.38417e+06	4.54558e+06	122305	1	1	1
AAH12292.1	Heat shock 27kDa protein 1 [OS=Homo sapiens]	0	94.744	57	8	80	2	205	22.8	6.4	232.24	8	Pf00011	3315	HSPB1	7		Apoptosis-related network due to altered Notch3 in ovarian cancer; Fas Ligand (FasL) pathway and Stress induction of Heat Shock Proteins (HSP) regulation; MAPK Signaling Pathway; VEGFA-VEGFR2 Signaling Pathway; p38 MAPK Signaling Pathway			5	0	1.339	1.191	0.968	0.317604	0.814193	0.87751	39.69	49.15	28.6	100.6	83.1	116.3	26.13	32.53	6.08	1.63777e+07	8.5252e+06	1.16122e+07	1.51688e+07	7.4605e+06	8803750	1.23244e+07	1.27515e+07	1.35324e+07	2	2	2
NP_005338.1	78 kDa glucose-regulated protein precursor [OS=Homo sapiens]	0	497.458	56	40	610	1	654	72.3	5.16	1567.1	40	Pf00012, Pf01968, Pf06723	3309	HSPA5	9	ENSG00000044574.7	Parkin-Ubiquitin Proteasomal System pathway; Apoptosis-related network due to altered Notch3 in ovarian cancer; Photodynamic therapy-induced unfolded protein response; MAPK Signaling Pathway	Protein processing in endoplasmic reticulum; Thyroid hormone synthesis; Prion diseases; Antigen processing and presentation; Protein export	Platelet degranulation ; PERK regulates gene expression; ATF6 (ATF6-alpha) activates chaperone genes; Antigen Presentation: Folding, assembly and peptide loading of class I MHC; Regulation of HSF1-mediated heat shock response; IRE1alpha activates chaperones	27	37	0.855	0.708	0.818	0.168273	0.0732152	0.254293	26.92	26.79	23.16	80.3	97.2	122.5	1.07	2.55	5.54	9.54289e+08	8.39867e+08	8.94264e+08	1.12787e+09	9.42895e+08	1.007e+09	1.47046e+09	1.30932e+09	1.30362e+09	34	35	34
BAG59536.1	unnamed protein product [OS=Homo sapiens]	0	49.688	56	8	54	8	218	23	9.57	95.57	8		90861	HN1L; JPT2	16	ENSG00000206053.12				0	0	1.084	1.013	0.954	0.922932	0.915753	0.83421	22.11	17.36	18.93	103.7	101.1	95.3	3.06	10.06	5.35	2.79381e+07	2.54505e+07	2.8162e+07	2.52652e+07	2.3431e+07	2.8401e+07	2.46545e+07	2.31637e+07	2.5559e+07	7	7	7
NP_001290430.1	calponin-2 isoform d [OS=Homo sapiens]	0	155.384	56	14	120	14	330	35.9	7.3	311.82	14	Pf00307, Pf00402	1265	CNN2	19	ENSG00000064666.14	Myometrial Relaxation and Contraction Pathways			1	0	1.196	1.168	0.951	0.309452	0.859085	0.824192	34.16	32.89	27.08	113.7	94.6	91.7	14.01	18.27	18.09	1.98859e+08	215738513	2.48921e+08	1.40933e+08	1.7607e+08	1.79191e+08	1.42647e+08	1.79835e+08	2.00328e+08	13	14	14
AAB91536.1	cell cycle protein p38-2G4 homolog [OS=Homo sapiens]	0	220.934	56	23	151	23	394	43.8	6.55	374.94	23	Pf00557	5036	PA2G4	12					0	0	1.133	1.08	0.974	0.639363	0.988452	0.883272	36.26	43.93	40.2	106.5	97.1	96.4	11.18	12.86	8.71	3.91888e+08	2.78008e+08	3.16216e+08	3.30087e+08	2.24388e+08	2.65052e+08	3.16268e+08	2.72072e+08	2.62016e+08	20	20	18
AAA58371.1	apurinic endonuclease [OS=Homo sapiens]	0	144.506	56	11	70	1	318	35.6	8.12	187.23	11	Pf03372, Pf14529	328	APEX1	14		Human Thyroid Stimulating Hormone (TSH) signaling pathway			1	10	0.947	1.001	1.03	0.75285	0.893881	0.997409	16.5	20.24	20.09	97.2	100.4	102.4	5.14	4.4	7.41	8.25936e+07	6.55103e+07	7.2627e+07	7.97092e+07	6.52063e+07	6.82556e+07	7.42314e+07	6.77988e+07	7.80417e+07	11	10	11
BAA02633.1	Apex nuclease [OS=Homo sapiens]	0	142.764	56	11	71	1	318	35.5	8.12	188.36	11	Pf03372, Pf14529	328	APEX1	14		Human Thyroid Stimulating Hormone (TSH) signaling pathway			1	0
ABO65079.1	peroxiredoxin 6, partial [OS=Homo sapiens]	0	21.957	56	5	6	5	80	9	5.15	11.6	5	Pf00578	9588	PRDX6	1					0	0	1.666	1.376	0.837	0.000323777	0.388603	0.334025	35.05	19.97	31.71	121.4	81.5	97.1	11.79	27.84	7.98	3.37128e+07	2.50855e+07	2.55686e+07	2.28445e+07	1.1279e+07	1.68109e+07	2.16695e+07	2.07386e+07	18112991	3	3	3
BAG38086.1	unnamed protein product [OS=Homo sapiens]	0	187.985	56	20	128	20	475	51.6	8.22	285.87	20	Pf01213, Pf07986, Pf08603	10487	CAP1	1		Angiopoietin Like Protein 8 Regulatory Pathway; Insulin Signaling			2	0	0.919	0.916	0.993	0.578803	0.689036	0.926283	30.96	41.6	47.61	93.8	105.2	101	9.67	2.62	6.78	1.36297e+08	1.42209e+08	1.52847e+08	1.66964e+08	1.54116e+08	1.57478e+08	1.59605e+08	1.67964e+08	1.45634e+08	18	19	19
AAH51814.1	YWHAZ protein, partial [OS=Homo sapiens]	0	264.901	56	21	390	3	320	35.3	7.21	680.99	21	Pf00244	7534	YWHAZ	8		Cell Cycle; Prolactin Signaling Pathway; Pathogenic Escherichia coli infection; Myometrial Relaxation and Contraction Pathways; Calcium Regulation in the Cardiac Cell; Sudden Infant Death Syndrome (SIDS) Susceptibility Pathways			6	18	0.992	0.912	0.939	0.915175	0.678643	0.78105	44.21	32.99	38.44	104.2	99.1	96.7	4.57	4.86	0.65	6.57132e+08	5.83082e+08	5.81299e+08	5.8733e+08	5.54007e+08	5.35082e+08	5.66278e+08	5.47987e+08	5.46017e+08	19	21	20
AAH00047.2	RPL8 protein, partial [OS=Homo sapiens]	0	238.54	56	13	165	4	211	22.9	10.55	527.38	13	Pf00181, Pf03947	6132	RPL8	8		Cytoplasmic Ribosomal Proteins			1	0	1.085	1.048	0.978	0.90769	0.970674	0.893275	31.34	20.56	26.42	101.1	101.9	97	5.09	6.49	6.43	4.24955e+07	3.65729e+07	3.66652e+07	3.97007e+07	3.44717e+07	4.09019e+07	3.31013e+07	3.64138e+07	3.60037e+07	4	4	4
AAV38817.1	Tyrosine 3-monooxygenase/tryptophan 5-monooxygenase activation protein, theta polypeptide [OS=Homo sapiens]	0	175.676	56	17	301	3	245	27.7	4.82	441.57	17	Pf00244	10971	YWHAQ	2		Cell Cycle; Pathogenic Escherichia coli infection; IL-3 Signaling Pathway; Myometrial Relaxation and Contraction Pathways; Calcium Regulation in the Cardiac Cell; Sudden Infant Death Syndrome (SIDS) Susceptibility Pathways			6	10	1.085	1.062	0.946	0.850588	0.988004	0.804051	27.9	28.69	29.15	105.9	102.5	91.6	2.47	5.88	6.2	3.00514e+08	2.62583e+08	2.73414e+08	2.73261e+08	2.46117e+08	2.32241e+08	2.63321e+08	2.34381e+08	2.28777e+08	13	13	13
BAD96188.1	ribosomal protein P0 variant, partial [OS=Homo sapiens]	0	191.278	56	15	190	15	317	34.3	5.97	530.57	15	Pf00428, Pf00466	6175	RPLP0	12		Cytoplasmic Ribosomal Proteins			1	0	0.985	0.998	1.017	0.887638	0.890905	0.977218	33.24	45.09	51	80.9	85.4	133.7	8.63	8.89	1.43	2.20005e+08	1.62682e+08	2.02552e+08	2.11622e+08	1.60985e+08	2.01761e+08	3.24381e+08	3.245e+08	3.13442e+08	12	14	13
NP_055075.1	Prefoldin subunit 6 [OS=Homo sapiens]	0	26.116	56	5	26	5	129	14.6	8.88	37.33	5	Pf01920, Pf15499	10471	PFDN6	6; CHR_HSCHR6_MHC_COX_CTG1; CHR_HSCHR6_MHC_DBB_CTG1; CHR_HSCHR6_MHC_MCF_CTG1; CHR_HSCHR6_MHC_QBL_CTG1	ENSG00000204220.11; ENSG00000237335.8; ENSG00000224782.8; ENSG00000235692.8; ENSG00000206283.10			Prefoldin mediated transfer of substrate to CCT/TriC	5	0	1.229	1.279	1.051	0.495754	0.624205	0.972747	28.02	30.25	21.53	110	93.9	96.1	3.16	15.02	2.76	2.41411e+07	2.0782e+07	2.15692e+07	2.20756e+07	1.43135e+07	1.77226e+07	1.91402e+07	1.93746e+07	1.82064e+07	5	4	3
BAE45763.1	putative protein product of Nbla10058 [OS=Homo sapiens]	0	165.897	56	18	146	18	433	48.6	6.13	390.95	18	Pf00004, Pf00158, Pf07724, Pf07726, Pf07728, Pf13191, Pf13401	5701	PSMC2	7		Proteasome Degradation; Parkin-Ubiquitin Proteasomal System pathway			2	0	1.187	1.302	1.109	0.351147	0.565834	0.857561	19.07	30.2	23.74	113.7	97.1	89.2	3.69	2.95	5.16	2.11246e+08	1.74955e+08	1.86942e+08	1.58215e+08	1.41046e+08	1.55345e+08	1.38565e+08	1.50451e+08	1.40793e+08	17	16	17
AAH12197.1	Ribosomal protein L8 [OS=Homo sapiens]	0	136.662	56	15	108	6	257	28	11.03	185.61	15	Pf00181, Pf03947	6132	RPL8	8		Cytoplasmic Ribosomal Proteins			1	9	1.024	1.085	1.053	0.99773	0.983805	0.969965	34.88	35.62	21.88	102	100.9	97.1	5.83	8.88	12.53	6.27523e+08	5.4873e+08	6.58575e+08	5.84879e+08	5.75284e+08	5.12089e+08	6.26869e+08	5.3984e+08	4.74728e+08	12	11	11
BAC05327.1	unnamed protein product [OS=Homo sapiens]	0	95.303	56	9	53	2	293	32.5	7.21	183.32	9	Pf01048	4860	PNP	14					0	7	1.066	1.028	0.948	0.966759	0.945386	0.813367	42.58	60.04	36.13	101.9	97.7	100.4	26.39	23.47	3.1	2.49206e+07	1.29156e+07	1.75741e+07	2.40039e+07	1.40426e+07	1.54661e+07	1.66427e+07	1.72647e+07	1.63198e+07	8	9	9
NP_005720.1	peptidyl-prolyl cis-trans isomerase F, mitochondrial precursor [OS=Homo sapiens]	0	54.035	56	6	30	6	207	22	9.38	81.21	6	Pf00160	10105	PPIF	10	ENSG00000108179.13		Calcium signaling pathway; Huntington's disease; Parkinson's disease; cGMP-PKG signaling pathway; Toxoplasmosis		5	0	0.639	0.764	1.185	0.0011837	0.170631	0.633889	37.32	52.79	37.25	75.2	111.6	113.2	25.54	24.62	7.95	1.88596e+07	1.09456e+07	1.16788e+07	2.55186e+07	1.53461e+07	1.5439e+07	1.73754e+07	1.52777e+07	1.77556e+07	6	6	6
NP_001032900.1	3-hydroxyacyl-CoA dehydrogenase type-2 isoform 2 [OS=Homo sapiens]	0	151.637	56	11	93	3	252	26	7.21	330.79	11	Pf00106, Pf08659, Pf13561	3028	HSD17B10	X	ENSG00000072506.12	Alzheimers Disease; Valproic acid pathway; Tryptophan metabolism			3	8	1.016	1.177	1.16	0.985562	0.83995	0.708255	27.34	25.07	24.76	107.1	101.2	91.7	15.37	17.71	2.55	1.17051e+08	8.33093e+07	8.29253e+07	1.10914e+08	7.09338e+07	7.86479e+07	7.84009e+07	7.36903e+07	7.28735e+07	10	11	11
EAW51019.1	hCG1748409, isoform CRA_b [OS=Homo sapiens]	0.035	1.302	56	1	1	1	45	4.8	8.38	0	1									0	0
BAG62363.1	unnamed protein product [OS=Homo sapiens]	0	54.188	55	3	32	1	101	11.2	5.39	142.02	3	Pf00578, Pf08534	9588	PRDX6	1					0	0	0.976	1.127	1.199	0.881607	0.925854	0.582195	5.55	18.19	22.88	99.8	102	98.1	7.25	9.49	24.72	2.08604e+07	1.87277e+07	2.26709e+07	2.3875e+07	1.76337e+07	1.91266e+07	1.21673e+07	19108593	1.88891e+07	1	1	1
BAD96198.1	chaperonin containing TCP1, subunit 7 (eta) variant, partial [OS=Homo sapiens]	0	214.507	55	27	180	27	543	59.3	7.65	425.47	27	Pf00118	10574	CCT7	2					0	0	0.983	1.07	1.086	0.881607	0.997135	0.897247	23.67	32.62	27.1	104.7	102.5	92.7	6.34	6.58	7.1	3.10009e+08	2.39557e+08	2.70075e+08	2.798e+08	2.15144e+08	2.42875e+08	2.2829e+08	2.27249e+08	2.52375e+08	24	25	25
NP_001121188.1	electron transfer flavoprotein subunit alpha, mitochondrial isoform b [OS=Homo sapiens]	0	89.221	55	12	59	1	284	30	8.57	160.64	12	Pf00766, Pf01012	2108	ETFA	15	ENSG00000140374.15				0	0
AAH06547.1	EEF2 protein, partial [OS=Homo sapiens]	0	377.348	55	33	453	18	583	64.7	8.56	1099.65	33	Pf00009, Pf03144, Pf14492	1938	EEF2	19		Translation Factors; AMP-activated Protein Kinase (AMPK) Signaling; Brain-Derived Neurotrophic Factor (BDNF) signaling pathway			3	0	1.015	1.035	1.053	0.985412	0.956303	0.96855	30.03	27.41	29.42	103.1	102.5	94.4	2.45	0.89	5.06	7.19065e+08	5.9965e+08	6.7795e+08	6.67742e+08	5.9127e+08	6.14264e+08	6.49907e+08	5.79693e+08	5.85952e+08	18	17	18
BAF84286.1	unnamed protein product [OS=Homo sapiens]	0	45.499	55	9	46	9	244	26.7	9.17	80.64	9	Pf03587	10436	EMG1	12					0	0	0.907	0.913	0.979	0.64603	0.680892	0.89471	27.08	32.76	24.37	91.9	99.9	108.2	5.46	8.55	16.4	2.9628e+07	2.49533e+07	3.01866e+07	34073315	26572904	2.68445e+07	3.20978e+07	2.39903e+07	3.2812e+07	8	9	9
EAW93603.1	replication protein A3, 14kDa, isoform CRA_a [OS=Homo sapiens]	0	16.099	55	2	20	2	82	9.2	4.54	72.09	2	Pf08661	6119	RPA3	7	ENSG00000106399.11	Retinoblastoma (RB) in Cancer; G1 to S cell cycle control; DNA Replication			3	0	0.893	1.07	1.277	0.638768	0.996616	0.323452	27.36	48.35	28.69	102.3	116.2	81.5	10.28	6.58	39.26	1.24636e+07	1.14533e+07	1.43754e+07	1.46943e+07	1.13035e+07	1.29931e+07	4.52114e+06	9.42511e+06	1.02014e+07	2	2	2
NP_112420.1	heterogeneous nuclear ribonucleoprotein A1 isoform b [OS=Homo sapiens]	0	369.52	55	25	361	23	372	38.7	9.13	963.11	25	Pf00076, Pf13893, Pf14259	3178	HNRNPA1	12	ENSG00000135486.17	mRNA Processing	Spliceosome	mRNA Splicing - Major Pathway; FGFR2 alternative splicing	11	0	1.144	1.161	0.977	0.585221	0.876115	0.890398	35.29	50.97	55.83	119	95.8	85.2	7.76	7.74	2.76	1.30362e+09	1.06152e+09	1.05923e+09	9.9132e+08	8.06871e+08	7.87366e+08	7.88519e+08	7.85605e+08	8.09409e+08	20	21	18
NP_060979.2	Leucine-rich repeat-containing protein 59 [OS=Homo sapiens]	0	161.12	55	14	169	14	307	34.9	9.57	495.36	14	Pf12799, Pf13855	55379	LRRC59	17	ENSG00000108829.9				0	0	1.076	1.006	0.829	0.870048	0.904538	0.29978	32.91	36.16	34.87	98.7	93.6	107.7	18.39	10.5	3.95	2.11035e+08	1.31242e+08	1.54321e+08	1.66243e+08	1.19024e+08	1.34505e+08	1.55275e+08	1.60063e+08	1.63375e+08	13	12	12
AAA35568.1	aspartate aminotransferase precursor [OS=Homo sapiens]	0	231.08	55	18	147	18	430	47.4	9.01	390.39	18	Pf00226, Pf13355	2806	GOT2	16		Alanine and aspartate metabolism; Glycolysis and Gluconeogenesis			2	0	0.975	1.073	1.057	0.864341	0.99814	0.961466	26.26	22.62	18.81	96.6	105.6	97.8	12.11	11.16	3.38	3.16626e+08	2.25421e+08	2.45442e+08	2.89442e+08	202818235	2.46549e+08	2.35014e+08	2.46242e+08	2.34561e+08	18	18	18
NP_004598.1	Tubulin-specific chaperone A isoform 2 [OS=Homo sapiens]	0	67.417	55	6	40	6	108	12.8	5.29	84.45	6	Pf02970	6902	TBCA	5	ENSG00000171530.13			Post-chaperonin tubulin folding pathway	3	0	1.082	1.178	1.116	0.856584	0.838547	0.835755	16.14	25.24	16.34	111.5	106.6	81.8	3.64	3.84	5.14	1.65534e+08	138729232	146175541	1.43257e+08	125303985	1.24053e+08	107303297	100699204	110699781	6	6	6
NP_001427.2	rRNA 2'-O-methyltransferase fibrillarin [OS=Homo sapiens]	0	150.477	55	12	102	12	321	33.8	10.18	249.34	12	Pf01135, Pf01269, Pf13847	2091	FBL	19; CHR_HG2021_PATCH	ENSG00000280548.3; ENSG00000105202.8		Ribosome biogenesis in eukaryotes	Major pathway of rRNA processing in the nucleolus and cytosol; rRNA modification in the nucleus and cytosol	6	0	0.873	0.943	1.053	0.258299	0.771348	0.967765	29.87	35.2	27.4	95.2	106.9	97.9	20.63	12.95	13.1	1.82221e+08	1.10574e+08	126369132	1.7297e+08	1.23348e+08	1.27923e+08	1.56836e+08	1.23318e+08	1.22619e+08	12	12	12
NP_919223.1	heterogeneous nuclear ribonucleoprotein A3 isoform a [OS=Homo sapiens]	0	291.394	54	23	262	5	378	39.6	9.01	651.59	23	Pf00076, Pf13893, Pf14259	220988	HNRNPA3	2	ENSG00000170144.20		Spliceosome	mRNA Splicing - Major Pathway	5	18	1.159	1.029	0.916	0.510251	0.947399	0.700026	23.81	33.99	31.15	106.4	92.4	101.2	3.89	5.52	7.6	3.95939e+08	359455619	4.06366e+08	3.17229e+08	3.10731e+08	3.11994e+08	3.32202e+08	3.79175e+08	3.50876e+08	23	23	23
NP_004102.1	Flap endonuclease 1 [OS=Homo sapiens]	0	160.84	54	15	71	15	380	42.6	8.62	198.92	15	Pf00752, Pf00867, Pf01367	2237	FEN1	11	ENSG00000168496.3		Base excision repair; Non-homologous end-joining; DNA replication	POLB-Dependent Long Patch Base Excision Repair; Early Phase of HIV Life Cycle; Removal of the Flap Intermediate; HDR through MMEJ (alt-NHEJ); PCNA-Dependent Long Patch Base Excision Repair; Removal of the Flap Intermediate from the C-strand	32	0	1.032	1.229	1.143	0.995115	0.748192	0.757302	27.19	28.94	31.61	106	104.7	89.3	9.63	5.34	1.96	9.19181e+07	9.50794e+07	1.0388e+08	1.09698e+08	8.87085e+07	9.2171e+07	8.23632e+07	8.39134e+07	8.21189e+07	13	15	13
BAG58843.1	unnamed protein product [OS=Homo sapiens]	0	235.772	54	19	233	7	305	33.6	8.46	604.13	19	Pf00056, Pf02866	3939	LDHA	11		Photodynamic therapy-induced HIF-1 survival signaling; Glycolysis and Gluconeogenesis			2	10	1.002	1.076	1.006	0.947953	0.995561	0.954429	36.55	29.16	34.05	103	97.8	99.1	8.72	18.17	5	1.21416e+09	8.90617e+08	1.08643e+09	1.32966e+09	8.37008e+08	9.47324e+08	1.09213e+09	9.74827e+08	9.85978e+08	16	16	15
NP_002892.1	reticulocalbin-1 precursor [OS=Homo sapiens]	0	173.674	54	13	112	13	331	38.9	5	326.31	13	Pf13499	5954	RCN1	11	ENSG00000049449.8			Post-translational protein phosphorylation; Regulation of Insulin-like Growth Factor (IGF) transport and uptake by Insulin-like Growth Factor Binding Proteins (IGFBPs)	4	0	1.123	0.828	0.811	0.680213	0.364253	0.230682	36.95	28.78	27.38	98.6	85.6	115.8	7.92	18.96	10.36	2.11918e+08	1.58403e+08	1.82493e+08	2.10217e+08	1.32069e+08	1.45631e+08	2.36223e+08	2.03685e+08	1.87679e+08	13	13	14
ABC40730.1	heat shock 90kDa protein 1, alpha [OS=Homo sapiens]	0	1019.92	54	62	1624	42	854	98.1	5.16	4002.33	62	Pf00183, Pf02518, Pf13589	3320	HSP90AA1	14		TNF alpha Signaling Pathway; Corticotropin-releasing hormone signaling pathway; Aryl Hydrocarbon Receptor; EBV LMP1 signaling; Constitutive Androstane Receptor Pathway; VEGFA-VEGFR2 Signaling Pathway			6	0	1.138	1.087	0.953	0.611838	0.981982	0.830766	30.84	27.54	27.85	108.2	92.5	99.3	1.72	5.22	4.47	2.25367e+09	1.90252e+09	2.09126e+09	1.67632e+09	1.55329e+09	1.72602e+09	1.7346e+09	1.84984e+09	1.81084e+09	43	43	42
NP_001295374.1	N-alpha-acetyltransferase 50 isoform 2 [OS=Homo sapiens]	0	51.553	54	8	57	8	168	19.3	8.81	104.12	8	Pf00583, Pf13420, Pf13508, Pf13527, Pf13673	80218	NAA50	3	ENSG00000121579.12	Metapathway biotransformation			1	0	1.122	1.123	1.057	0.841766	0.935403	0.960829	32.79	31.15	24.57	104.9	95.4	99.7	16.92	11.97	10.26	5.39926e+07	3.53904e+07	3.89103e+07	3.40319e+07	3.70034e+07	3.253e+07	3.61336e+07	2.9365e+07	3.48846e+07	8	8	8
NP_039234.1	Chloride intracellular channel protein 4 [OS=Homo sapiens]	0	60.973	54	8	38	8	253	28.8	5.59	87.33	8	Pf00043, Pf13409, Pf13410, Pf13417, Pf14497	25932	CLIC4	1	ENSG00000169504.14				0	0	0.788	0.793	0.917	0.0254068	0.248098	0.70211	33.3	29.22	31.48	76.1	122.8	101	32.81	24.69	10.78	3.42169e+07	5.16918e+07	6.49645e+07	5.70483e+07	8.09728e+07	8.33205e+07	8.41741e+07	6.73316e+07	7.03586e+07	7	7	7
AAD21815.1	HSP70-2 [OS=Homo sapiens]	0	344.852	54	33	301	6	641	70	5.66	790.93	33	Pf00012, Pf06723	3304	HSPA1B	6		Parkin-Ubiquitin Proteasomal System pathway			1	23	1.066	1.03	0.991	0.896509	0.949533	0.922331	22.27	25.26	25.11	103.5	99.2	97.3	9.11	13.07	7.53	2.56366e+08	2.62243e+08	2.87389e+08	2.18999e+08	2.374e+08	2.61618e+08	2.32657e+08	2.64141e+08	2.52986e+08	28	28	28
AAA36368.1	neuroleukin [OS=Homo sapiens]	0	326.42	54	24	238	1	558	63.1	8.32	713.67	24	Pf00342	2821	GPI	19		Glycolysis and Gluconeogenesis			1	23	1.044	1.06	0.992	0.967912	0.985514	0.92474	25.06	27.22	23.96	100.6	103.7	95.7	11.79	4.73	4.35	8.21033e+08	5.88794e+08	6.3852e+08	6.78123e+08	5.73589e+08	5.72392e+08	6.3403e+08	574921314	5.74599e+08	24	23	22
AAF22645.1	sperm antigen-36 [OS=Homo sapiens]	0	352.473	54	24	239	1	558	63.1	8.32	721.5	24	Pf00342								0	0	0.175	0.029	0.168	4.72103e-08	1.62313e-16	1.7785e-16	80.47	80.47	0	7.3	42.1	250.6	69.95			188515	403450	116018			941106			5.75701e+06	1	1	1
NP_003396.1	14-3-3 protein eta [OS=Homo sapiens]	0	111.074	54	15	89	11	246	28.2	4.84	171.4	15	Pf00244	7533	YWHAH	22	ENSG00000128245.14	Cell Cycle; Myometrial Relaxation and Contraction Pathways; Calcium Regulation in the Cardiac Cell; Sudden Infant Death Syndrome (SIDS) Susceptibility Pathways	Viral carcinogenesis; Cell cycle; Epstein-Barr virus infection; Oocyte meiosis; PI3K-Akt signaling pathway; Hippo signaling pathway	Translocation of GLUT4 to the plasma membrane; Chk1/Chk2(Cds1) mediated inactivation of Cyclin B:Cdk1 complex; TP53 Regulates Metabolic Genes; Activation of BAD and translocation to mitochondria ; RHO GTPases activate PKNs	32	0	1.035	0.986	0.941	0.986795	0.866845	0.788816	24.73	17.12	21.48	78.5	106.1	115.4	3.4	21.39	15.23	8.45692e+07	7.79688e+07	8.55547e+07	7.72973e+07	1.02496e+08	1.05285e+08	1.20867e+08	9.55515e+07	1.28873e+08	10	9	9
EAX07023.1	ribosomal protein S8, isoform CRA_a, partial [OS=Homo sapiens]	0	241.066	54	18	239	18	239	27.4	10.29	590.33	18	Pf01201	6202	RPS8	1		Cytoplasmic Ribosomal Proteins			1	0	0.96	0.963	1.023	0.808694	0.812522	0.985052	23.62	18.37	25.17	98.7	105	96.3	7.94	2.64	5.42	7.38908e+08	5.76853e+08	6.03561e+08	6.52488e+08	6.01948e+08	6.12962e+08	6.09595e+08	5.37597e+08	5.77203e+08	18	18	18
BAG70165.1	autoantigen La, partial [OS=Homo sapiens]	0	210.864	54	21	159	21	408	46.8	7.12	300.52	21	Pf00076, Pf05383, Pf08777, Pf14259	6741	SSB	2					0	0	1.025	0.973	0.944	0.997771	0.834567	0.800392	25.29	33.48	30.32	95.2	95.6	109.1	2.65	1.74	5.31	2.25882e+08	1.88441e+08	2.04856e+08	2.06202e+08	1.74757e+08	1.89069e+08	2.14572e+08	2.23205e+08	2.32168e+08	21	21	20
NP_001961.1	eukaryotic translation initiation factor 5A-1 isoform B [OS=Homo sapiens]	0	230.172	54	11	180	11	154	16.8	5.24	548.67	11	Pf01287	1984	EIF5A	17	ENSG00000132507.17	Translation Factors; eIF5A regulation in response to inhibition of the nuclear export system		Hypusine synthesis from eIF5A-lysine	6	0	1.076	1.008	0.956	0.870048	0.907822	0.83838	25.95	20.66	22.82	101.6	99.6	98.8	7.07	9.94	6.33	5.0234e+08	3.81209e+08	4.39575e+08	4.75529e+08	3.42259e+08	3.95668e+08	4.39293e+08	4.05918e+08	3.76447e+08	11	10	11
AAA03341.1	ribosomal protein L23a, partial [OS=Homo sapiens]	0	117.068	54	11	140	11	156	17.7	10.45	322.6	11	Pf00276, Pf03939	6147	RPL23A	17		Cytoplasmic Ribosomal Proteins			1	0	0.979	1.019	1.058	0.870048	0.926286	0.959096	23.91	45.88	35.38	85.7	99.2	115.1	9.25	9.06	3.49	2.05781e+08	1.60417e+08	1.62968e+08	1.86046e+08	1.75543e+08	2.06365e+08	2.40147e+08	2.20807e+08	2.211e+08	10	10	9
NP_002810.1	polypyrimidine tract-binding protein 1 isoform a [OS=Homo sapiens]	0	254.494	54	20	179	17	557	59.6	9.16	602.42	20	Pf00076, Pf13893, Pf14259	5725	PTBP1	19	ENSG00000011304.19	mir-124 predicted interactions with cell cycle and differentiation; mRNA Processing			2	3	1.113	1.034	0.87	0.738344	0.955036	0.500407	40.36	36.28	35.51	102.8	91.9	105.3	1.06	2.06	3.11	2.42477e+08	2.07305e+08	2.2726e+08	2.01065e+08	1.73282e+08	1.9091e+08	2.34324e+08	2.1595e+08	2.1946e+08	18	17	16
XP_005251033.1	PREDICTED: plectin isoform X3 [OS=Homo sapiens]	0	2241.02	54	242	1668	237	4689	532.1	5.97	4073.66	242	Pf00307, Pf00681, Pf03501, Pf07812	5339	PLEC	8					0	5	0.918	0.752	0.824	0.576501	0.147228	0.276689	24.69	29.91	26.83	87.4	97.1	115.5	2.07	3.33	11.28	2.63989e+09	2.2308e+09	2.41247e+09	2.77258e+09	2.33917e+09	2.40706e+09	3.66684e+09	2.91752e+09	3.02251e+09	217	219	218
NP_001158887.1	L-lactate dehydrogenase A chain isoform 4 [OS=Homo sapiens]	0	220.648	54	15	199	3	274	30	8	530.93	15	Pf00056, Pf02866	3939	LDHA	11	ENSG00000134333.13	Cori Cycle; Photodynamic therapy-induced HIF-1 survival signaling; Amino Acid metabolism; Glycolysis and Gluconeogenesis			4	0	1.178	1.191	0.992	0.39579	0.814193	0.924192	31.52	33.01	43.86	115	107.4	77.5	7.54	15.92	14.81	346109364	2.85399e+08	2.82633e+08	3.47962e+08	251806356	2.36501e+08	2.53442e+08	190087552	1.97329e+08	3	3	3
NP_002291.1	L-lactate dehydrogenase B chain isoform LDHB [OS=Homo sapiens]	0	169.193	54	19	191	16	334	36.6	6.05	391.45	19	Pf00056, Pf02866	3945	LDHB	12	ENSG00000111716.12	Glycolysis and Gluconeogenesis	Glycolysis / Gluconeogenesis; Propanoate metabolism; Cysteine and methionine metabolism; Glucagon signaling pathway; Metabolic pathways; Pyruvate metabolism	Pyruvate metabolism	11	3	1.028	1.074	1.088	0.99773	0.996044	0.894765	30.48	34.94	36.01	106.8	104	89.2	7.97	9.56	6.33	1.3835e+09	1.09181e+09	1.12449e+09	1.29478e+09	1.00479e+09	9.97445e+08	1.06822e+09	9.3682e+08	9.36308e+08	17	18	18
NP_004491.2	heterogeneous nuclear ribonucleoproteins C1/C2 isoform b [OS=Homo sapiens]	0	167.167	54	19	228	19	293	32.3	5.08	411.47	19	Pf00076, Pf13893, Pf14259	3183	HNRNPC	14	ENSG00000092199.17	mRNA Processing			1	0	1.02	1.088	0.949	0.993345	0.98058	0.815747	18.82	24.37	28.55	102.4	106	91.6	3.82	5.1	4.11	6.84183e+08	6.44788e+08	6.75781e+08	7.01221e+08	6.07792e+08	5.91507e+08	6.03477e+08	5.45109e+08	5.7039e+08	17	16	16
AAF62370.1	heterochromatin-like protein 1 [OS=Homo sapiens]	0	107.022	54	10	109	8	183	20.8	5.33	292.33	10	Pf00385, Pf01393	11335	CBX3	7		Exercise-induced Circadian Regulation			1	2	1.002	1.131	1.056	0.945894	0.917359	0.962089	27.31	24.78	16.24	95.5	108.4	96.1	8.29	9.46	13.43	1.40196e+08	1.258e+08	1.55046e+08	1.29965e+08	1.34804e+08	1.42847e+08	1.13054e+08	1.3074e+08	1.44232e+08	9	9	9
BAF82343.1	unnamed protein product [OS=Homo sapiens]	0	63.376	53	10	59	1	286	32.9	5.69	126.26	10	Pf01267	829	CAPZA1	1					0	0	1.136	0.872	0.765	0.966759	0.730301	0.367701	28.05	19.33	20.5	108.5	80.3	111.1	16.72	17.8	18.31	724942	458695	664697	434877	427336	567651		736805	563693	1	1	1
Q9H3K6.1	RecName: Full=BolA-like protein 2 [OS=Homo sapiens]	0	53.935	53	4	26	4	86	10.1	6.52	66.58	4	Pf01722	654483; 552900; 107984053	BOLA2B; BOLA2; LOC107984053	16				Gene and protein expression by JAK-STAT signaling after Interleukin-12 stimulation; Interleukin-12 family signaling	5	0	0.894	0.891	1.022	0.585221	0.598033	0.984371	19.37	34.33	39.07	88.7	102.3	109	6.56	4.48	9.41	2.32107e+07	1.93392e+07	2.39182e+07	2.71914e+07	2.20827e+07	2.33692e+07	2.62677e+07	2.2704e+07	2.71916e+07	4	4	4
AAX82302.1	Actin-like protein, partial [OS=Homo sapiens]	0	111.151	53	3	187	1	103	11.5	6.52	589.96	3	Pf00022	71	ACTG1	17		Arrhythmogenic Right Ventricular Cardiomyopathy; Pathogenic Escherichia coli infection; Myometrial Relaxation and Contraction Pathways; Focal Adhesion; Fas Ligand (FasL) pathway and Stress induction of Heat Shock Proteins (HSP) regulation; Striated Muscle Contraction; Regulation of Actin Cytoskeleton			7	0	0.808	2.773	2.773	0.237148	1.91581e-07	4.08461e-13	76.68	136.88	141.75	123.6	153	23.4	91.69	83.68	102.85	638420	23850606	15028925	1126952	22527016	17081094	787113	8887435	2.68658e+06	1	1	1
BAG60258.1	unnamed protein product [OS=Homo sapiens]	0	91.345	53	12	75	12	363	39.8	5.31	152.24	12	Pf00400	11171	STRAP	12	ENSG00000023734.10	TGF-beta Signaling Pathway			1	0	1.062	1.113	1.099	0.91152	0.951643	0.883272	17.8	26.78	19.56	105.3	101.2	93.5	8.7	1.35	2.88	1.12783e+08	9.02636e+07	89964841	9.34789e+07	8.32072e+07	8.56462e+07	8.44815e+07	8.01042e+07	8.42235e+07	12	12	11
NP_006635.2	heat shock protein 105 kDa isoform 1 [OS=Homo sapiens]	0	488.123	53	46	511	42	858	96.8	5.39	1383.41	46	Pf00012	10808	HSPH1	13	ENSG00000120694.19		Protein processing in endoplasmic reticulum	Scavenging by Class F Receptors; Regulation of HSF1-mediated heat shock response	8	4	1.101	1.056	1.011	0.789592	0.98058	0.965103	23.82	32.82	27.23	111.5	97.6	90.9	2.1	5.51	2.1	8.99102e+08	7.83922e+08	8.22511e+08	7.34289e+08	7.0986e+08	6.85742e+08	6.89502e+08	6.48047e+08	6.5545e+08	40	41	40
XP_005259352.1	PREDICTED: calpain small subunit 1 isoform X1 [OS=Homo sapiens]	0	112.341	53	10	67	10	322	33.8	6.23	204.2	10	Pf13499, Pf13833	826	CAPNS1	19	ENSG00000126247.10	Integrin-mediated Cell Adhesion			1	0	1.083	0.992	0.942	0.869879	0.88306	0.794078	43.56	31.89	26.59	96.9	97.1	106	17.02	4.23	7.92	1.1081e+08	7.50229e+07	7.74036e+07	8.09139e+07	7.1678e+07	7.00684e+07	9.54104e+07	8.00611e+07	8.41793e+07	8	9	8
AAL35904.1	protein phosphatase type 2A catalytic subunit [OS=Homo sapiens]	0	97.667	53	11	55	3	309	35.6	5.43	183.15	11	Pf00149	5516	PPP2CB	8		Serotonin Transporter Activity; Dopamine metabolism; Wnt Signaling Pathway and Pluripotency; Exercise-induced Circadian Regulation; Glycogen Metabolism; Monoamine Transport			6	0	1.056	1.366	1.112	0.989423	0.409636	0.848942	43.11	46.27	31.28	112.4	95.7	91.9	16.8	8.31	17.34	1.07163e+07	7568993	1.15746e+07	8.57912e+06	8.17121e+06	7.3173e+06	5.86835e+06	7.91626e+06	7.84845e+06	3	3	3
ABD77165.1	ribosomal protein L18, partial [OS=Homo sapiens]	0	127.394	53	13	104	2	164	18.7	11.81	267.64	13	Pf00828	6141	RPL18	19		Cytoplasmic Ribosomal Proteins			1	11	1.048	1.029	0.961	0.95494	0.946063	0.856352	28.8	42.07	35.12	101	98.6	100.4	9.31	8.87	3.66	3.19415e+08	2.58521e+08	2.51576e+08	2.87598e+08	2.11414e+08	2.52032e+08	2.85252e+08	2.65651e+08	2.58658e+08	13	12	12
EAW74048.1	glucosidase, alpha; neutral AB, isoform CRA_d [OS=Homo sapiens]	0	210.293	53	27	168	1	749	85.1	6.34	404.3	27	Pf01055, Pf13802	23193	GANAB	11					0	0	0.913	3.063	4.411	0.840872	0.000402712	3.87543e-15	34.79	96.99	88.37	128	140.2	31.8	62.85	16.72	86.01	792335	3.46094e+06	2.86048e+06		3.06451e+06	2.55549e+06	238145	1.68246e+06	669906	1	1	1
AAC39751.1	Cargo selection protein TIP47 [OS=Homo sapiens]	0	136.348	53	14	64	14	434	47	5.44	188.11	14	Pf03036	10226	PLIN3	19					0	0	1.333	1.116	0.883	0.158708	0.946499	0.554175	27.49	34.18	30.43	102.8	94.8	102.4	19.97	24.23	17.02	2.86856e+07	3.38514e+07	4.08214e+07	2.17023e+07	3.06441e+07	3.11815e+07	2.6834e+07	3.67127e+07	3.45727e+07	9	10	11
NP_001120665.1	cellular nucleic acid-binding protein isoform 2 [OS=Homo sapiens]	0	136.631	53	10	66	2	178	19.6	7.58	158.46	10	Pf00098	7555	CNBP	3	ENSG00000169714.16				0	8	0.989	1.238	1.374	0.89985	0.725422	0.118513	26.07	74.94	70.93	100.4	105.6	94	5.5	8.07	6.82	1.75488e+08	1.67888e+08	1.65866e+08	1.73629e+08	1.57485e+08	1.42425e+08	1.51374e+08	1.52606e+08	1.32771e+08	8	9	8
BAB55174.1	unnamed protein product [OS=Homo sapiens]	0	153.486	53	14	88	1	396	44.7	7.81	214.95	14	Pf01926, Pf02421, Pf06071	29789	OLA1	2					0	0		0.01	0.01		1.62313e-16	1.7785e-16						300												2190420
BAA06338.1	glycyl tRNA synthetase [OS=Homo sapiens]	0	256.178	53	28	168	1	739	83.1	7.03	387.91	28	Pf00458, Pf00587, Pf03129	2617	GARS	7					0	24	0.791	0.686	0.992	0.0138634	0.0471281	0.924234	36.38	52.23	40.42	80	102.5	117.5	19.28	23.95	16.37	1.84711e+08	1.14664e+08	1.30697e+08	2.44389e+08	1.44024e+08	1.5371e+08	2.23846e+08	1.58688e+08	1.81064e+08	22	19	22
NP_001274271.1	14 kDa phosphohistidine phosphatase isoform 4 [OS=Homo sapiens]	0	41.541	53	4	33	4	127	14	5.77	85.55	4	Pf05005	29085	PHPT1	9					0	0	1.062	1.141	1.097	0.966759	0.905161	0.883272	22.64	32.91	26.41	106.8	106	87.2	6.82	1.52	2.95	3.88339e+07	35417554	3.36436e+07	3.57728e+07	3.23363e+07	3.36131e+07	2.8597e+07	28618432	2.94805e+07	4	3	4
NP_940848.2	Uncharacterized protein C1orf122 isoform 1 [OS=Homo sapiens]	0	16.169	53	3	10	3	110	11.5	6.73	31.9	3		127687	C1orf122	1	ENSG00000197982.13				0	0	1.354	1.563	1.282	0.508861	0.156978	0.44001	15.23	27.8	14.44	127.8	99.3	73	9.28	6.52	24.46	6.5044e+06	5.02506e+06	5.16364e+06	4205025	3.81916e+06	3553962	4.44301e+06	2.96668e+06	2.84748e+06	2	2	2
AAH16765.1	PDZ and LIM domain 4 [OS=Homo sapiens]	0	128.759	53	14	81	14	330	35.3	7.71	142.76	14	Pf00412, Pf00595	8572	PDLIM4	5					0	0	0.935	0.755	0.789	0.664203	0.152549	0.154902	24	23.14	17.51	92.2	97.5	110.3	5.97	8.14	4.66	1.02801e+08	8.01839e+07	8.95409e+07	1.02031e+08	7.60397e+07	8.70402e+07	1.04763e+08	9.42516e+07	1.01112e+08	13	13	13
NP_002884.1	histone-binding protein RBBP7 isoform 2 [OS=Homo sapiens]	0	130.856	53	12	96	10	425	47.8	5.05	191.69	12	Pf00400, Pf12265	5931	RBBP7	X	ENSG00000102054.17	Retinoblastoma (RB) in Cancer; Interactome of polycomb repressive complex 2 (PRC2)		RMTs methylate histone arginines; Regulation of TP53 Activity through Acetylation; PKMTs methylate histone lysines; Activation of anterior HOX genes in hindbrain development during early embryogenesis; HATs acetylate histones; Neddylation; Deposition of new CENPA-containing nucleosomes at the centromere; ERCC6 (CSB) and EHMT2 (G9a) positively regulate rRNA expression; Regulation of PTEN gene tran…	41	0	1.135	1.064	1.027	0.63035	0.988452	0.993203	19.03	42.86	30.75	152.2	113.7	34.1	5.06	4.25	76.89	4.28205e+08	3.67269e+08	3.69245e+08	2.95476e+08	2.66345e+08	2.59011e+08	7.32163e+07	8.51453e+07	2.63741e+08	9	9	9
AAA36460.1	purine nucleoside phosphorylase [OS=Homo sapiens]	0	75.115	53	8	49	1	289	32.2	7.53	195.13	8	Pf01048	4860	PNP	14					0	0	0.609	0.766	1.394	0.420557	0.542225	0.654474	181.48	550.59	112.2	87.3	123.8	88.8	139.38	126.49	50.43	3.06743e+06	19441.9		1.91935e+06	74319.3	323176	244769	196347	479609	1	1
NP_003409.1	cellular nucleic acid-binding protein isoform 3 [OS=Homo sapiens]	0	138.765	53	9	71	1	177	19.5	7.71	172.04	9	Pf00098	7555	CNBP	3	ENSG00000169714.16				0	0	0.294	0.341	0.965	7.8297e-09	4.22517e-06	0.854413	30.2	53.91	53.91	44.4	125.5	130.1	24.01	13.27	46.44	807658	1.11768e+06	1.19996e+06	3.22393e+06	2.94521e+06	3.80376e+06	1.65517e+06	3.33975e+06	4520658	1	1	1
NP_001317176.1	heterogeneous nuclear ribonucleoprotein A3 isoform b [OS=Homo sapiens]	0	236.925	53	20	211	2	356	37	8.31	499.35	20	Pf00076, Pf13893, Pf14259	220988	HNRNPA3	2	ENSG00000170144.20				0	0	1.111	1.509	1.323	0.867352	0.163718	0.210339	12.66	38.25	29.02	121.7	106.5	71.8	10.12	5.87	16.38	3.32971e+07	3.3306e+07	3.86954e+07	3.1419e+07	2.94039e+07	2.76641e+07	2.0727e+07	1.84072e+07	2.49902e+07	2	2	2
EAW86999.1	Ribosomal protein L7, isoform CRA_a [OS=Homo sapiens]	0	163.123	53	16	200	16	259	30.4	10.71	349.74	16	Pf00327, Pf08079	6129	RPL7	8		Cytoplasmic Ribosomal Proteins			1	0	1.078	1.193	1.077	0.869879	0.810822	0.916228	15.5	29.45	30.99	109.4	98.1	92.5	3	7.53	1.55	7.25221e+08	6.42946e+08	6.5968e+08	662441395	5.35869e+08	5.28813e+08	5.71621e+08	5.43181e+08	5.48903e+08	16	16	16
XP_005257069.1	PREDICTED: clathrin heavy chain 1 isoform X1 [OS=Homo sapiens]	0	897.337	52	78	643	78	1682	192.3	5.69	1804.63	78	Pf00637, Pf01394, Pf04053, Pf09268, Pf13838	1213	CLTC	17		VEGFA-VEGFR2 Signaling Pathway; Complement and Coagulation Cascades			2	0	1.11	1.027	0.916	0.754446	0.941295	0.700026	27.9	31	25.29	104.4	96.2	99.4	1.53	2.29	1.65	1.29459e+09	1.16525e+09	1.24589e+09	1.09673e+09	1.0046e+09	1.05364e+09	1.13451e+09	1.14899e+09	1.11865e+09	70	69	70
AAB37341.1	nuclear corepressor KAP-1 [OS=Homo sapiens]	0	426.432	52	29	316	29	835	88.5	5.77	913.81	29	Pf00628, Pf00643	10155	TRIM28	19		Corticotropin-releasing hormone signaling pathway			1	0	0.96	0.95	1.005	0.811295	0.787659	0.950105	30.75	33.62	24.81	95.4	98.5	106.2	1.54	4.45	2.5	4.01361e+08	3.40381e+08	3.72392e+08	3.76679e+08	3.34049e+08	3.78919e+08	3.86073e+08	3.96311e+08	3.90988e+08	26	26	27
NP_001950.1	Elongation factor 1-beta [OS=Homo sapiens]	0	100.108	52	10	108	9	225	24.7	4.67	414.95	10	Pf00736, Pf14497	1933	EEF1B2	2; CHR_HSCHR2_6_CTG7_2	ENSG00000283391.1; ENSG00000114942.13	Translation Factors		Eukaryotic Translation Elongation	4	0	1.076	1.263	1.019	0.869879	0.667529	0.97979	31.32	48.25	29.11	105	104.4	90.6	6.89	3.47	12.39	2.32827e+08	1.79049e+08	2.18724e+08	2.24823e+08	1.88805e+08	1.94768e+08	2.16183e+08	1.79383e+08	1.66047e+08	9	8	8
AAF99680.1	DNA-binding protein TAXREB107 [OS=Homo sapiens]	0	178.122	52	16	162	16	289	32.9	10.58	329.11	16	Pf01159, Pf03868	6128	RPL6	12		Cytoplasmic Ribosomal Proteins			1	0	1.035	1.158	1.088	0.989423	0.88306	0.896614	18.48	27.4	22.63	111.4	97.8	90.8	10.01	3.74	9.22	6.24972e+08	5.62351e+08	5.04923e+08	5.15732e+08	4.45452e+08	5.0553e+08	5.45383e+08	4.59258e+08	4.52237e+08	15	14	15
AAD19900.1	putative translation initiation factor A121/Sui1 [OS=Homo sapiens]	0	46.418	52	4	39	4	113	12.7	7.44	96.6	4	Pf01253	10209	EIF1	17		Translation Factors			1	0	0.995	1.219	1.234	0.929844	0.768555	0.467612	18	23.91	17.67	105	109.2	85.7	6.64	11.56	18.81	4.56085e+07	4.33337e+07	4.94299e+07	4.62542e+07	50306530	4.50254e+07	4.83829e+07	3.65499e+07	3.31464e+07	3	4	4
AAC80170.1	alpha SNAP [OS=Homo sapiens]	0	89.427	52	10	58	10	295	33.2	5.36	135.21	10	Pf14938	8775	NAPA	19					0	0	1.04	1.182	1.095	0.997968	0.832434	0.883272	26.15	29.11	29.03	105.5	104.2	90.3	1.26	4.22	13.61	3.41968e+07	2.92666e+07	3.17211e+07	3.12442e+07	2.54002e+07	2.88657e+07	2.6422e+07	2.80215e+07	2.11844e+07	9	9	9
AAB01041.1	ribosomal protein L9 [OS=Homo sapiens]	0	93.726	52	8	105	4	192	21.9	9.95	346.99	8	Pf00347	6133	RPL9	4		Cytoplasmic Ribosomal Proteins			1	4	1.052	1.071	1.021	0.944495	0.999203	0.981326	18.14	9.61	16.14	104.1	99.7	96.2	9.09	1.14	2.02	1.44779e+08	1.47423e+08	1.62737e+08	1.53099e+08	1.33375e+08	1.38863e+08	1.47707e+08	1.40767e+08	1.38179e+08	7	7	7
NP_938149.2	neutral alpha-glucosidase AB isoform 3 precursor [OS=Homo sapiens]	0	330.937	52	34	262	1	966	109.4	6.24	699.66	34	Pf01055, Pf13802	23193	GANAB	11	ENSG00000089597.16				0	1	1.619	2.124	1.292	0.18258	0.0118007	0.785438	14.53	19.76	10.85	255.1	23.9	20.9	17.07	9.89	109.59	5739327	3.56737e+06	5.07354e+06	505601		407659	403712	310597	2.15815e+06	2	2	2
NP_001306086.1	dynein light chain roadblock-type 1 isoform d [OS=Homo sapiens]	0	44.015	52	5	46	2	121	13.4	10.08	117.03	5	Pf03259	83658	DYNLRB1	20					0	3	1.064	1.157	1.079	0.966759	0.884527	0.914131	17.94	16.67	14.66	106.3	100.3	93.4	1.3	1.81	6.65	4.0665e+07	3.64054e+07	3.88837e+07	3.58818e+07	3.18856e+07	3.44914e+07	2.98865e+07	3.32661e+07	3.22416e+07	5	5	5
CAA46472.1	hnRNP U protein [OS=Homo sapiens]	0	493.398	52	42	392	42	806	88.9	5.78	1016.71	42	Pf00622, Pf13671	3192	HNRNPU	1		mRNA Processing			1	0	0.97	0.992	1.001	0.849924	0.88306	0.947369	30.39	29.86	24.18	94	105.5	100.5	1.88	2.79	2.9	8.95455e+08	7.88619e+08	8.8131e+08	9.66372e+08	8.03008e+08	8.84386e+08	8.89355e+08	8.52003e+08	8.9579e+08	36	37	38
ABC40673.1	rcTPM3, partial [OS=Homo sapiens]	0	175.342	52	13	129	1	247	28.8	4.79	312.81	13	Pf00261								0	0	1.153	1.125	1.047	0.763208	0.931092	0.978525	7.74	6.77	10.01	108.9	94.4	96.7	0.61	8.71	8.74	33642384	29046540	31901608	27401432	22840050	28559418	24239062	28222072	26735436	1	1	1
AAD44500.1	Homologous yeast-44.2 protein [OS=Homo sapiens]	0	140.307	52	14	92	1	396	44.7	7.81	212.66	14	Pf01926, Pf02421, Pf06071	29789	OLA1	2					0	13	1.115	1.167	1.001	0.730212	0.862287	0.944831	19.64	23.7	19.26	106	96.4	97.6	10.43	11.39	8.78	2.14028e+08	1.58119e+08	1.69117e+08	1.82259e+08	1.35813e+08	1.36632e+08	1.72137e+08	1.50396e+08	1.41303e+08	13	13	13
BAD96367.1	ribosomal protein L18a variant, partial [OS=Homo sapiens]	0	82.34	52	12	74	1	176	20.7	10.71	134.07	12	Pf01775	6142	RPL18A	19		Cytoplasmic Ribosomal Proteins			1	0	1.229	2.143	1.772	0.805412	0.0115788	0.00784268	19.37	15.37	10.5	130.8	108.1	61	22.65	9.99		5538834	3541998	3452759	3.38455e+06	2576665		1.74244e+06			1	1	1
BAG56942.1	unnamed protein product [OS=Homo sapiens]	0	279.174	52	25	236	25	631	68.7	7.66	680.71	25	Pf00456, Pf00676, Pf02779, Pf02780	7086	TKT	3		Pentose Phosphate Pathway			1	0	0.975	0.975	1.021	0.8607	0.837911	0.981762	27.15	33.27	26.93	107.8	100.6	91.6	7.03	3.54	3.75	5.0659e+08	5.03096e+08	5.41942e+08	472481103	4.42338e+08	4.64341e+08	4.33516e+08	4.5763e+08	4.34372e+08	21	21	21
EAW58394.1	stomatin (EPB72)-like 2, isoform CRA_a [OS=Homo sapiens]	0	159.066	52	11	104	11	370	40	7.93	381.9	11	Pf01145	30968	STOML2	9					0	0	0.919	0.978	1.111	0.645745	0.845009	0.852247	29.04	15.79	17.61	95.7	108.9	95.4	5.04	5.86	4.78	5.62854e+07	5.24452e+07	5.16909e+07	6.6432e+07	5.26243e+07	5.58659e+07	4.82344e+07	5.06378e+07	5.14995e+07	8	8	9
NP_955392.1	tumor protein D54 isoform a [OS=Homo sapiens]	0	96.976	52	10	51	10	229	24.8	6.42	156.09	10	Pf04201	7165	TPD52L2	20	ENSG00000101150.17				0	0	1.017	0.989	0.954	0.972412	0.873578	0.83421	16.59	15.75	16.95	98.9	98.3	102.9	4.81	5.49	3.55	6.4231e+07	5.69057e+07	5.65142e+07	5.66783e+07	5.5489e+07	5.56757e+07	6.15049e+07	5.70386e+07	6.0552e+07	7	7	7
EAW95181.1	ARP3 actin-related protein 3 homolog (yeast), isoform CRA_b [OS=Homo sapiens]	0	88.363	51	7	69	4	171	19.5	6.02	240.93	7	Pf00022	10096	ACTR3	2					0	0	1.087	1.175	1.052	0.915175	0.844928	0.972008	19.83	15.19	15.68	108.8	98.2	92.9	2.42	7.53	14.27	1.4827e+07	13357733	1.38546e+07	1.25814e+07	1.10244e+07	1.32537e+07	9.37572e+06	1.14221e+07	1.21034e+07	3	3	3
NP_001032726.1	transcription factor BTF3 isoform A [OS=Homo sapiens]	0	89.333	51	7	52	7	206	22.2	9.38	187.26	7	Pf01849	689	BTF3	5	ENSG00000145741.15				0	0	1.179	1.157	1.092	0.673679	0.883792	0.886934	32.32	44.01	28.58	111.1	94.8	94.1	5.08	14.17	11.02	3.46632e+07	3.25987e+07	3.22152e+07	2.53955e+07	2.92601e+07	2.57766e+07	3.10639e+07	2.64799e+07	2.43976e+07	6	6	5
NP_665906.1	high mobility group protein HMG-I/HMG-Y isoform a [OS=Homo sapiens]	0	83.85	51	5	63	2	107	11.7	10.32	162.69	5		3159	HMGA1	6	ENSG00000137309.19	Adipogenesis; Preimplantation Embryo; Senescence and Autophagy in Cancer		2-LTR circle formation; APOBEC3G mediated resistance to HIV-1 infection; Integration of viral DNA into host genomic DNA; Vpr-mediated nuclear import of PICs; Autointegration results in viral DNA circles; Formation of Senescence-Associated Heterochromatin Foci (SAHF)	21	3	1.047	0.857	0.872	0.959201	0.465943	0.506978	58.05	65.72	48.74	93.8	96.6	109.6	17.94	4.01	9.65	1.56867e+08	9.51008e+07	1.30795e+08	1.3351e+08	1.11526e+08	1.27759e+08	1.69484e+08	1.45263e+08	1.37291e+08	5	5	5
NP_001275907.1	X-ray repair cross-complementing protein 6 isoform 3 [OS=Homo sapiens]	0	332.597	51	30	257	2	559	64.2	9.28	583.53	30	Pf02037, Pf02735, Pf03730, Pf03731	2547	XRCC6	22	ENSG00000196419.12	Non-homologous end joining			1	27	0.999	0.971	0.99	0.93421	0.829551	0.917902	20.56	24.24	20.19	98.6	99.7	101.7	2.14	4.23	2.25	4.85153e+08	4.41874e+08	4.73452e+08	4.97889e+08	4.15499e+08	4.24649e+08	4.73395e+08	4.73688e+08	4.49482e+08	26	27	26
NP_004246.2	Cytochrome c oxidase subunit 5A, mitochondrial precursor [OS=Homo sapiens]	0	51.651	51	4	34	4	150	16.8	6.79	106.42	4	Pf02284	9377	COX5A	15	ENSG00000178741.11	Electron Transport Chain; Arachidonate Epoxygenase / Epoxide Hydrolase	Parkinson's disease; Oxidative phosphorylation; Cardiac muscle contraction; Non-alcoholic fatty liver disease (NAFLD); Alzheimer's disease; Huntington's disease; Metabolic pathways	TP53 Regulates Metabolic Genes; Respiratory electron transport	18	0	1.125	1.372	1.325	0.811295	0.396594	0.204904	37.95	35.43	40.67	104.3	100.2	95.5	18.51	28.28	18.27	5.49498e+07	3.34292e+07	4.17626e+07	5.36516e+07	2.67172e+07	3.68321e+07	2.69871e+07	3.63446e+07	3.73406e+07	4	4	4
EAW73904.1	PRP19/PSO4 pre-mRNA processing factor 19 homolog (S. cerevisiae), isoform CRA_a [OS=Homo sapiens]	0	130.408	51	13	96	13	419	45.7	7.06	224.45	13	Pf00400, Pf08606	27339	PRPF19	11					0	0	1.029	1.035	1.013	0.99773	0.955858	0.970476	17.71	21.47	20.19	104.1	101.3	94.6	4.55	5.61	1.66	1.2563e+08	1.03338e+08	1.22993e+08	1.23072e+08	9.66303e+07	1.0667e+08	1.07778e+08	1.02379e+08	1.02243e+08	11	10	10
NP_001264069.1	actin-related protein 3 isoform 2 [OS=Homo sapiens]	0	126.886	51	12	92	9	367	42	5.62	289.24	12	Pf00022	10096	ACTR3	2	ENSG00000115091.11	Association Between Physico-Chemical Features and Toxicity Associated Pathways			1	3	1.139	1.103	0.949	0.638779	0.967226	0.816432	27.56	27.42	22.84	107.9	98	94.1	5.45	1.08	2.8	86408108	7.866e+07	9.13602e+07	7.77366e+07	6.67274e+07	7.13573e+07	7.23534e+07	7.23265e+07	6.79158e+07	11	11	12
NP_005508.1	Non-histone chromosomal protein HMG-17 [OS=Homo sapiens]	0	131.5	51	6	81	6	90	9.4	9.99	321.86	6		3151	HMGN2	1	ENSG00000198830.10				0	0	1.123	1.096	1.023	0.692456	0.970674	0.985052	76.04	131.54	61.91	93.4	64.3	142.3	7.45	3.15	20.49	9.38338e+07	9.28523e+07	1.0224e+08	6.88819e+07	5.90945e+07	6.64874e+07	1.22842e+08	1.81336e+08	1.45053e+08	5	5	5
EAW60005.1	hCG2010544 [OS=Homo sapiens]	0	98.449	51	5	51	2	135	15.6	9.61	216.44	5	Pf00833	402057	RPS17P16	22					0	4	1.366	1.129	0.836	0.0550531	0.922527	0.329383	27.49	63.15	68.12	125.6	89.3	85.1	8.29	11.73	12.05	5.50893e+07	4.53031e+07	4.43229e+07	4.14168e+07	2.93491e+07	3.21658e+07	3.23755e+07	3.15411e+07	3.84475e+07	5	5	5
NP_006861.1	destrin isoform a [OS=Homo sapiens]	0	126.016	51	11	119	8	165	18.5	7.85	232.42	11	Pf00241	11034	DSTN	20	ENSG00000125868.15	Androgen receptor signaling pathway			1	0	0.979	1.078	1.095	0.870048	0.990976	0.883272	33.18	43.75	20.89	112.4	98.4	89.2	6.25	13.45	8.52	2.28898e+08	1.81136e+08	1.94077e+08	2.10197e+08	1.49817e+08	1.53296e+08	1.65603e+08	1.48481e+08	1.35892e+08	8	8	8
NP_001180414.1	LIM and senescent cell antigen-like-containing domain protein 1 isoform a [OS=Homo sapiens]	0	118.443	51	14	76	14	387	44.4	8.02	112.85	14	Pf00412	3987	LIMS1	2	ENSG00000169756.16	Primary Focal Segmental Glomerulosclerosis FSGS			1	0	0.703	0.874	1.144	0.000369128	0.532538	0.751759	27.35	23.45	24.15	85.4	121	93.7	7.45	6.22	1.48	5.11773e+07	5.17802e+07	5.3798e+07	8.12264e+07	6.62169e+07	6.66105e+07	5.71778e+07	5.75107e+07	5.56762e+07	10	9	10
AAH18190.1	metallothionein 1X [OS=Homo sapiens]	0	28.588	51	4	24	1	61	6	7.84	37.32	4		4501	MT1X	16		Zinc homeostasis; Oxidative Stress			2	0	0.306	0.65	2.068	2.57769e-05	0.245637	0.0038023	77.72	75.81	53.8	52.4	166.9	80.7	61.82	61.2		340090	1.02523e+06	544864	1.09381e+06	3.1648e+06	1.59236e+06			790529	1	1	1
AAB35211.1	ornithine aminotransferase, OAT [OS=Homo sapiens]	0	124.902	51	15	84	14	439	48.5	6.86	182.2	15	Pf00202								0	1	0.901	1.287	1.484	0.470543	0.603271	0.0279698	19.9	34.76	34.94	105.3	116.6	78.1	6.74	3.49	34.94	6.99625e+07	6.45857e+07	7.59123e+07	7.34434e+07	6.75281e+07	7.29561e+07	2.57629e+07	51953453	4.90939e+07	14	13	14
CAA73150.1	unnamed protein product, partial [OS=Homo sapiens]	0	64.374	51	7	34	3	193	22.3	7.62	123.23	7	Pf01997	7247	TSN	2					0	4	1.215	1.089	0.881	0.600022	0.97822	0.55006	31.65	25.07	29.11	93.6	95.2	111.2	4.93	19.37	13.72	1.9098e+07	1.66693e+07	1.66248e+07	2.07113e+07	1.22439e+07	1.69408e+07	2.14831e+07	1.62183e+07	2.03281e+07	5	6	6
BAG58692.1	unnamed protein product [OS=Homo sapiens]	0	364.046	51	34	278	2	995	112.9	6.06	753.11	34	Pf01055, Pf04901, Pf13802								0	32	1.077	1.101	0.975	0.869879	0.967812	0.885019	26.32	34.81	29.79	103.6	95.9	100.5	8.69	8.7	10.86	3.52487e+08	2.59103e+08	3.02736e+08	3.03248e+08	2.23481e+08	2.57223e+08	2.38197e+08	2.87101e+08	2.77006e+08	32	32	33
AAA51681.1	S-adenosylhomocysteine hydrolase [OS=Homo sapiens]	0	242.285	51	26	196	25	432	47.7	6.47	457.27	26	Pf00670, Pf02254, Pf02826, Pf05221	191	AHCY	20		Folate Metabolism; Trans-sulfuration pathway; One Carbon Metabolism; Trans-sulfuration and one carbon metabolism			4	1	1.003	1.013	1.029	0.949488	0.914439	0.995605	21.6	26.72	20.1	97.6	101.5	100.9	2.33	3.85	3.38	643028059	5.40741e+08	6.14001e+08	5.92938e+08	5.59746e+08	5.83011e+08	6.45985e+08	5.99764e+08	5.91154e+08	25	23	25
NP_005711.1	Actin-related protein 2/3 complex subunit 1B [OS=Homo sapiens]	0	107.342	51	12	92	11	372	40.9	8.35	249.04	12	Pf00400	10095	ARPC1B	7	ENSG00000130429.12	Pathogenic Escherichia coli infection; Microglia Pathogen Phagocytosis Pathway	Fc gamma R-mediated phagocytosis; Salmonella infection; Shigellosis; Regulation of actin cytoskeleton; Endocytosis; Bacterial invasion of epithelial cells; Pathogenic Escherichia coli infection	Regulation of actin dynamics for phagocytic cup formation; EPHB-mediated forward signaling; RHO GTPases Activate WASPs and WAVEs	21	1	1.056	1.021	0.977	0.928654	0.931092	0.890209	22.73	32.66	21.61	103.1	91	106	6.82	7.12	19.74	1.13503e+08	1.08023e+08	1.0282e+08	8.50392e+07	8.25871e+07	9.07201e+07	7.45274e+07	1.05521e+08	1.04481e+08	12	11	11
AAH40844.1	Syncrip protein [OS=Homo sapiens]	0	141.999	50	16	135	1	410	46.2	8.88	228.71	16	Pf00076, Pf06682, Pf13893, Pf14259	10492	SYNCRIP	6					0	0	1.113	1.734	1.496	0.918979	0.0444628	0.0444745	11.18	35.87	31.95	120.8	109.4	69.7	4.9	16.38	27.4	6052029	5415458	5353606	5.15403e+06	4.59788e+06	3573470	4344721	3.14933e+06	2.45257e+06	1	1	1
CAG33698.1	PPP2CA [OS=Homo sapiens]	0	92.797	50	11	53	3	309	35.5	5.54	161.99	11	Pf00149	5515	PPP2CA	5		TNF alpha Signaling Pathway; Brain-Derived Neurotrophic Factor (BDNF) signaling pathway; Dopamine metabolism; Wnt Signaling Pathway and Pluripotency; Glycogen Metabolism			5	6	1.16	1.211	0.957	0.757394	0.786309	0.843576	28.52	37.02	21.28	105.6	96.4	98	10.49	10.81	5.58	3.69001e+07	2.71385e+07	2.92088e+07	2.66746e+07	1.97599e+07	2.57832e+07	2.56244e+07	2.79887e+07	2.58192e+07	7	7	7
EAW86690.1	ubiquitin-conjugating enzyme E2 variant 2, isoform CRA_c [OS=Homo sapiens]	0	19.212	50	3	10	1	103	11.7	5.52	27.95	3		7336	UBE2V2	8					0	0	0.786	0.898	1.142	0.266773	0.623741	0.759853	22.07	9.36	28.16	88.6	112.7	98.7	9.49	20.39	2.02	8173885	8576311	8.25099e+06	8.32016e+06	11026577	9639604	8805304	8732162	8909165	1	1	1
CAA80599.1	hnRNP G protein [OS=Homo sapiens]	0	250.062	50	27	271	27	391	42.4	10.02	527.99	27	Pf00076, Pf08081, Pf13893, Pf14259	27316	RBMX	X		mRNA Processing			1	0	0.989	1.119	1.158	0.899848	0.941295	0.713773	36.05	38.97	37.96	113.9	104.9	81.1	3.84	6.38	6.84	4.88511e+08	4.13996e+08	4.2964e+08	4.10746e+08	3.65099e+08	3.4289e+08	3.24839e+08	2.77971e+08	3.02368e+08	24	26	27
AAB50217.1	protein disulfide isomerase-related protein 5, partial [OS=Homo sapiens]	0	190.02	50	15	141	15	421	46.2	5.08	427.42	15	Pf00085, Pf13098, Pf13848, Pf13899, Pf13905	10130	PDIA6	2		Photodynamic therapy-induced unfolded protein response			1	0	0.997	0.94	0.916	0.928654	0.761302	0.701181	25.24	30.78	20.21	86	91.2	122.8	5.83	11.62	23.41	1.98847e+08	1.61088e+08	1.68489e+08	1.72835e+08	1.61391e+08	1.9997e+08	1.82633e+08	2.37766e+08	2.86928e+08	13	14	13
P55145.3	RecName: Full=Mesencephalic astrocyte-derived neurotrophic factor; AltName: Full=Arginine-rich protein; AltName: Full=Protein ARMET; Flags: Precursor [OS=Homo sapiens]	0	41.725	50	6	31	6	182	20.7	8.69	52.9	6	Pf10208	7873	MANF	3				Platelet degranulation	4	0	1.092	1.031	0.88	0.903538	0.95018	0.544715	15.71	24.34	21.8	98.4	94.1	107.5	14.05	3.49	3.5	2.61324e+07	2.95109e+07	3.19434e+07	3.02602e+07	2.64951e+07	2.97732e+07	3.21142e+07	3.36641e+07	3.2912e+07	6	5	5
NP_001027454.1	thymopoietin isoform beta [OS=Homo sapiens]	0	137.284	50	17	90	7	454	50.6	9.38	219.75	17	Pf03020, Pf08198	7112	TMPO	12	ENSG00000120802.13			Depolymerisation of the Nuclear Lamina; Initiation of Nuclear Envelope Reformation; Clearance of Nuclear Envelope Membranes from Chromatin	11	9	1.068	1.073	1.009	0.903538	0.99814	0.962089	23.2	32.37	17.14	106.1	97.7	96.2	4.73	7.9	5.98	9.63877e+07	7.65931e+07	8.67316e+07	7.90745e+07	7.22152e+07	6.53958e+07	7.62201e+07	8.03833e+07	70944633	15	15	14
NP_057951.1	RNA-binding protein Raly isoform 1 [OS=Homo sapiens]	0	103.323	50	11	51	1	306	32.4	9.17	130.37	11	Pf00076, Pf13893, Pf14259	22913	RALY	20	ENSG00000125970.11				0	0	1.07	1.312	1.226	0.980794	0.540254	0.495896	1.7	15.14	15.14	111.3	103.9	84.8	0.99	2.13	13.1	6.58308e+06	5.79874e+06	6.37482e+06	5.9656e+06	5.11777e+06	5.30301e+06	5.46486e+06	4.14495e+06	4534577	1	1	1
NP_001653.1	ADP-ribosylation factor 5 [OS=Homo sapiens]	0	52.763	50	7	37	3	180	20.5	6.79	123.84	7	Pf00025, Pf00071, Pf00503, Pf01926, Pf04670, Pf08477, Pf09439	381	ARF5	7	ENSG00000004059.10		Endocytosis	COPI-dependent Golgi-to-ER retrograde traffic; COPI-mediated anterograde transport	12	0	1.312	1.544	1.126	0.205364	0.131136	0.805284	14.14	17.6	17.32	123.6	97.2	79.2	2.41	6.36	10.49	39632473	3.57944e+07	3.7166e+07	3.15569e+07	2.56884e+07	25809383	2.77898e+07	2.29142e+07	2.25635e+07	2	2	2
AAD12785.2	SUMO-1-activating enzyme E1 N subunit [OS=Homo sapiens]	0	66.66	50	11	62	2	346	38.3	5.22	122.54	11	Pf00899	10055	SAE1	19					0	9	1.149	1.171	1.005	0.657765	0.851995	0.950105	21.97	30.36	30.83	123.8	91.4	84.8	0.57	4.82	5.02	7.59439e+07	6.58408e+07	7.12997e+07	5.23417e+07	4.24655e+07	4.91362e+07	4.43088e+07	4.79214e+07	4.62435e+07	10	10	11
NP_001104026.1	Filamin-A isoform 2 [OS=Homo sapiens]	0	1243.92	50	97	927	2	2647	280.6	6.06	2494.75	97	Pf00307, Pf00630	2316	FLNA	X	ENSG00000196924.14	Androgen receptor signaling pathway; Prolactin Signaling Pathway; Focal Adhesion; Hypothesized Pathways in Pathogenesis of Cardiovascular Disease; MAPK Signaling Pathway; IL-4 Signaling Pathway	Salmonella infection; Focal adhesion; Proteoglycans in cancer; MAPK signaling pathway	Platelet degranulation ; RHO GTPases activate PAKs; Cell-extracellular matrix interactions; GP1b-IX-V activation signalling	22	0	1.222	1.343	1.062	0.55344	0.459976	0.94848	18.27	29.42	13.56	124.8	95.8	79.4	5.11	10.99	13.23	3.26719e+07	3.12456e+07	3.38966e+07	2.77018e+07	2.25998e+07	2.06221e+07	2.57526e+07	2.04819e+07	1.98477e+07	2	2	2
NP_001949.1	Elongation factor 1-alpha 2 [OS=Homo sapiens]	0	214.154	50	16	758	4	463	50.4	9.03	1998.64	16	Pf00009, Pf03143, Pf03144	1917	EEF1A2	20	ENSG00000101210.10	Translation Factors	Legionellosis; RNA transport	Eukaryotic Translation Elongation	6	0	1.028	0.969	1.083	0.991881	0.825383	0.906075	22.41	32.64	26.22	112.3	99.7	88	12.43	6.69	20.75	2.83107e+07	2.86841e+07	3.45324e+07	2.68209e+07	2.40576e+07	2.81517e+07	1.75398e+07	2.32135e+07	2.60561e+07	3	3	3
XP_016885266.1	PREDICTED: ubiquitin-like modifier-activating enzyme 1 isoform X1 [OS=Homo sapiens]	0	430.174	50	41	332	41	1109	123.1	5.85	990.3	41	Pf00899, Pf02134, Pf09358, Pf10585	7317	UBA1	X		Proteasome Degradation; Parkin-Ubiquitin Proteasomal System pathway; Parkinsons Disease Pathway			3	0	1.021	0.967	0.939	0.995934	0.819358	0.78402	24.04	31.15	25.05	100.2	97.7	102.2	5.73	6.88	5.24	5.59689e+08	4.39399e+08	4.87173e+08	5.27599e+08	4.1076e+08	4.36336e+08	5.22728e+08	4.65551e+08	4.68593e+08	37	38	36
XP_016876581.1	PREDICTED: peptidyl-prolyl cis-trans isomerase FKBP3 isoform X1 [OS=Homo sapiens]	0	86.108	50	9	45	9	229	26	9.69	88.65	9	Pf00254	2287	FKBP3	14					0	0	1.016	0.843	0.928	0.968349	0.416259	0.736396	19.87	26.43	23.59	88.4	95.1	116.5	12.16	22.36	8.88	4.64873e+07	3.38177e+07	3.5359e+07	5.20168e+07	3.43461e+07	3.14385e+07	4.69634e+07	4.74951e+07	3.97402e+07	6	5	7
NP_005817.1	Heterogeneous nuclear ribonucleoprotein R isoform 2 [OS=Homo sapiens]	0	161.767	50	22	161	14	633	70.9	8.13	273.53	22	Pf00076, Pf13893, Pf14259	10236	HNRNPR	1; CHR_HSCHR1_4_CTG3	ENSG00000282958.1; ENSG00000125944.18	mRNA Processing		mRNA Splicing - Major Pathway	5	0	1.08	1.03	0.905	0.895962	0.94963	0.658553	26.85	25.85	21.35	104.4	94.1	101.5	4.8	6.43	8.04	6.32486e+07	5.02514e+07	5.65272e+07	5.32115e+07	4.10357e+07	4.67962e+07	5.19087e+07	5.22249e+07	5.85489e+07	10	10	10
AAK74072.1	heat shock protein gp96 precursor, partial [OS=Homo sapiens]	0	360.072	50	38	322	1	782	90.1	4.82	771.23	38	Pf00183, Pf02518, Pf13589	7184	HSP90B1	12		Photodynamic therapy-induced unfolded protein response			1	0	0.944	0.324	0.352	0.943258	0.00174141	3.80217e-05	5.13	67.62	71.5	59.2	62.7	178	6.25	0.8	61.71	9498.09	7332.55	8706	9081.89		8519.4	15893.2		39404.8	1	1	1
CAB82418.1	hypothetical protein, partial [OS=Homo sapiens]	0	307.053	50	34	347	24	630	73.9	6.87	672.94	34	Pf00373, Pf00769, Pf09379, Pf09380	7430	EZR	6		Pathogenic Escherichia coli infection; AGE/RAGE pathway; VEGFA-VEGFR2 Signaling Pathway; Regulation of Actin Cytoskeleton			4	1	1.101	0.823	0.77	0.789592	0.346473	0.106573	38.19	35.14	38.7	96.4	91.8	111.7	3.44	2.61	9.06	4.60151e+08	418493719	4.67964e+08	4.21009e+08	3.88775e+08	3.98107e+08	5.90917e+08	5.01191e+08	4.89423e+08	20	21	21
AAH63242.1	Fatty acid synthase [OS=Homo sapiens]	0	921.877	50	91	679	77	2511	273.2	6.43	1878.83	91	Pf00106, Pf00107, Pf00108, Pf00109, Pf00698, Pf00975, Pf02801, Pf08242, Pf08659, Pf13602, Pf14765	2194	FASN	17		SREBF and miR33 in cholesterol and lipid homeostasis; Liver X Receptor Pathway; Fatty Acid Biosynthesis			3	13	0.873	0.985	1.123	0.258922	0.863332	0.816621	24.33	30.97	23.85	95.1	109.2	95.7	4.77	4.52	4.02	1.05622e+09	8.50717e+08	9.23521e+08	1.10754e+09	8.87719e+08	9.76635e+08	9.53737e+08	8.84977e+08	8.58412e+08	80	77	80
BAD52436.1	Filamin a [OS=Homo sapiens]	0	1252.9	50	97	939	2	2620	278.1	6.06	2507.85	97	Pf00307, Pf00630	2316	FLNA	X	ENSG00000196924.14	Androgen receptor signaling pathway; Prolactin Signaling Pathway; Focal Adhesion; Hypothesized Pathways in Pathogenesis of Cardiovascular Disease; MAPK Signaling Pathway; IL-4 Signaling Pathway	Salmonella infection; MAPK signaling pathway; Focal adhesion; Proteoglycans in cancer		10	90	1.187	1.002	0.868	0.350897	0.897705	0.491587	24.71	28.04	23.24	109.4	91.2	99.4	5.96	0.44	4.71	2.59647e+09	2.05736e+09	2.21824e+09	1.85081e+09	1.61928e+09	1.70208e+09	2.11859e+09	1.93215e+09	1.88878e+09	88	89	89
XP_005250727.1	PREDICTED: protein BUD31 homolog isoform X1 [OS=Homo sapiens]	0	32.353	50	7	35	7	145	17.3	8.87	68.46	7	Pf01125	8896	BUD31	7					0	0	0.894	1.034	1.117	0.594682	0.955036	0.834128	22.11	26.05	19.87	99.6	107.1	93.2	3.12	3.76	5.85	2.23878e+07	1.88999e+07	2.18782e+07	23460355	1.90833e+07	2.09999e+07	1.92909e+07	1.94812e+07	1.72496e+07	6	6	6
EAW56893.1	ribosomal protein S16, isoform CRA_b [OS=Homo sapiens]	0	94.288	50	9	124	9	145	16.3	10.18	214.5	9	Pf00380	6217	RPS16	19		Cytoplasmic Ribosomal Proteins			1	0	1.02	1.108	1.061	0.993435	0.958462	0.949762	19.54	24.71	19.06	106.7	100.4	92.9	2.11	3.77	1.73	3.89552e+08	334908920	3.79742e+08	3.63159e+08	302100422	3.13346e+08	3.15581e+08	2.9895e+08	3.03542e+08	9	9	9
Q9Y237.1	RecName: Full=Peptidyl-prolyl cis-trans isomerase NIMA-interacting 4; AltName: Full=Parvulin-14; Short=Par14; Short=hPar14; AltName: Full=Parvulin-17; Short=Par17; Short=hPar17; AltName: Full=Peptidyl-prolyl cis-trans isomerase Pin4; Short=PPIase Pin4; AltName: Full=Peptidyl-prolyl cis/trans isomerase EPVH; Short=hEPVH; AltName: Full=Rotamase Pin4 [OS=Homo sapiens]	0	33.781	50	4	11	4	131	13.8	9.77	33.97	4	Pf00639, Pf13145, Pf13616	5303	PIN4	X					0	0	1.156	1.316	1.136	0.757096	0.530325	0.778126	12.72	21.02	26.13	117.7	105.7	76.6	4.12	4.93	16.77	2.74225e+07	2.59892e+07	27379704	2.26902e+07	21358564	2.3167e+07	1.72658e+07	19402306	1.3707e+07	4	3	3
AAA85658.1	ribosomal protein S5 [OS=Homo sapiens]	0	120.67	50	12	89	12	204	22.8	9.55	282.94	12	Pf00177	6193	RPS5	19		Cytoplasmic Ribosomal Proteins			1	0	0.981	0.979	1.016	0.878316	0.847695	0.975333	28.64	44.99	36.96	80.7	80.8	138.5	4.74	26.79	25.94	1.50394e+08	1.19785e+08	1.39666e+08	1.38578e+08	7.76369e+07	1.42205e+08	1.51225e+08	2.27786e+08	2.50167e+08	10	10	10
BAG65428.1	unnamed protein product [OS=Homo sapiens]	0	270.756	49	27	242	1	586	63.9	5.55	620.13	27	Pf00012, Pf06723	3303	HSPA1A	6		Apoptosis Modulation and Signaling; Parkin-Ubiquitin Proteasomal System pathway; MAPK Signaling Pathway; Apoptosis Modulation by HSP70; VEGFA-VEGFR2 Signaling Pathway			5	0
NP_001410.2	ELAV-like protein 1 [OS=Homo sapiens]	0	118.089	49	12	104	12	326	36.1	9.17	283.42	12	Pf00076, Pf13893, Pf14259	1994	ELAVL1	19	ENSG00000066044.14	AMP-activated Protein Kinase (AMPK) Signaling; Endoderm Differentiation; Preimplantation Embryo; Focal Adhesion-PI3K-Akt-mTOR-signaling pathway	AMPK signaling pathway	HuR (ELAVL1) binds and stabilizes mRNA; mRNA Splicing - Major Pathway	11	0	1.159	1.078	0.946	0.508503	0.991189	0.804051	18.43	20.77	18.65	119.9	87	93	13.28	1.49	3.6	1.20449e+08	1.08893e+08	9.1756e+07	82173969	7.18076e+07	7.80475e+07	8.60083e+07	8.92819e+07	8.30244e+07	12	12	10
ALQ33506.1	electron-transfer-flavoprotein alpha polypeptide isoform 3, partial [OS=Homo sapiens]	0	88.064	49	12	59	1	310	32.6	8.4	160.2	12	Pf00766, Pf01012	2108	ETFA	15					0	11	1.027	1.285	1.192	0.986795	0.608409	0.608215	26.96	32.6	31.49	117.6	94.1	88.3	14.04	13.91	10.18	4.85872e+07	3.93807e+07	3.48596e+07	3.43044e+07	2.32619e+07	3.14958e+07	2.6115e+07	3.05808e+07	3.05967e+07	10	11	10
BAG63519.1	unnamed protein product [OS=Homo sapiens]	0	192.263	49	20	127	1	594	65.9	7.3	317.29	20	Pf00117, Pf00665, Pf00733, Pf00958, Pf01171, Pf02540, Pf03054, Pf06508, Pf07722	8833	GMPS	3					0	0
AAH19315.1	N-acetylneuraminic acid synthase [OS=Homo sapiens]	0	121.608	49	11	92	11	359	40.3	6.74	238.42	11	Pf03102, Pf08666	54187	NANS	9					0	0	0.92	0.993	1.041	0.583645	0.883937	0.986833	21.43	22.53	20.89	99	104	97	2.26	10.28	9.91	9.834e+07	8.22278e+07	9.03869e+07	1.08561e+08	8.24804e+07	8.29052e+07	9.98844e+07	8.1732e+07	8.35469e+07	11	11	11
NP_004640.4	ES1 protein homolog, mitochondrial isoform 1 precursor [OS=Homo sapiens]	0	74.738	49	8	43	8	268	28.2	8.27	116.39	8	Pf01965	8209; 102724023	C21orf33; LOC102724023	21	ENSG00000160221.16	Gastric Cancer Network 1			1	0	1.244	1.302	1.144	0.454638	0.566547	0.751759	42.91	41.52	22.6	112.5	98.8	88.7	27.28	19.31	6.1	4.17869e+07	2.13637e+07	2.89239e+07	3.31526e+07	20399512	2.3338e+07	2.01461e+07	2.2208e+07	2.15001e+07	5	5	5
EAW61507.1	arginyl-tRNA synthetase [OS=Homo sapiens]	0	164.897	49	24	119	24	660	75.3	6.68	249.34	24	Pf00750, Pf03485, Pf05746	5917	RARS	5					0	0	1.01	0.996	1.014	0.970103	0.890905	0.97383	27.07	32.62	22.87	98.3	104.9	96.8	9.05	16.94	8.28	1.11924e+08	8.85921e+07	88732247	1.18076e+08	7.34911e+07	9.43827e+07	1.04263e+08	9.01243e+07	8.71239e+07	18	19	19
NP_006443.1	Multifunctional protein ADE2 isoform 2 [OS=Homo sapiens]	0	167.544	49	20	131	20	425	47	7.23	373.44	20	Pf00731, Pf01259	10606	PAICS	4	ENSG00000128050.8		Metabolic pathways; Purine metabolism	Purine ribonucleoside monophosphate biosynthesis	6	0	0.989	1.035	1.048	0.899848	0.955858	0.977212	31	25.6	25.08	97.9	102.9	99.2	7.53	5.58	3.31	1.74502e+08	1.34281e+08	1.45573e+08	1.62504e+08	1.27665e+08	1.4098e+08	1.4338e+08	1.34455e+08	1.42453e+08	18	17	17
XP_005247645.1	PREDICTED: protein CDV3 homolog isoform X1 [OS=Homo sapiens]	0	64.445	49	5	33	5	259	27.5	6.4	98.81	5	Pf15359	55573	CDV3	3					0	0	1.029	1.036	0.943	0.993345	0.957251	0.798516	20.02	24.7	20.09	99.4	97.7	102.9	8.98	8.5	6.91	2.36539e+07	1.84159e+07	1.88588e+07	1.69598e+07	1.74625e+07	1.80768e+07	2.00869e+07	1.80426e+07	2.05572e+07	5	5	5
AAD47084.1	Prefoldin subunit 2 [OS=Homo sapiens]	0	80.071	49	6	47	6	155	17.1	8.43	113.71	6	Pf01920	5202	PFDN2	1					0	0	1.011	1.05	0.986	0.954575	0.972049	0.910009	19.74	25.08	34.72	118.3	118.1	63.5	5.85	11.27	30.14	5.76754e+07	5.59296e+07	6.05866e+07	5.52988e+07	6.04212e+07	5.55508e+07	3.15347e+07	2.92947e+07	4.87021e+07	5	5	6
NP_001406.1	eukaryotic translation initiation factor 2 subunit 3 [OS=Homo sapiens]	0	178.267	49	19	161	8	472	51.1	8.4	389.89	19	Pf00009, Pf03144, Pf09173	1968	EIF2S3	X	ENSG00000130741.10	Translation Factors	RNA transport	Formation of the ternary complex, and subsequently, the 43S complex; L13a-mediated translational silencing of Ceruloplasmin expression; ABC-family proteins mediated transport; Translation initiation complex formation; GTP hydrolysis and joining of the 60S ribosomal subunit; Recycling of eIF2:GDP; Ribosomal scanning and start codon recognition	15	11	0.945	0.982	1.011	0.731333	0.853073	0.966159	18.97	22.33	20.92	97.9	103.2	98.9	7.5	8.19	11.23	3.41938e+08	2.65545e+08	2.83427e+08	3.34672e+08	2.64294e+08	2.64656e+08	3.29373e+08	2.77061e+08	2.58704e+08	20	18	20
CAG33023.1	RPN1 [OS=Homo sapiens]	0	205.816	49	23	158	23	607	68.6	6.38	397	23	Pf04597	6184	RPN1	3		Proteasome Degradation			1	0	0.876	0.963	1.101	0.281129	0.811837	0.87945	32.94	36.05	29.44	98	103.7	98.3	5.82	4.81	10.46	1.89473e+08	1.52997e+08	1.60771e+08	1.88123e+08	1.52811e+08	1.59985e+08	1.34458e+08	1.59277e+08	1.57402e+08	20	21	21
AAP35656.1	ubiquitin-conjugating enzyme E2I (UBC9 homolog, yeast) [OS=Homo sapiens]	0	44.623	49	6	42	6	184	20.4	8.46	111.61	6	Pf00179, Pf14461	7329	UBE2I	16		Androgen receptor signaling pathway; TGF-beta Signaling Pathway			2	0	1.048	1.016	0.921	0.994452	0.917292	0.715949	34.44	51.25	44.83	106.8	93.5	99.7	17.28	2.08	7.1	3.75928e+07	2.32197e+07	2.98733e+07	2.64834e+07	2.27163e+07	2.35638e+07	2.63296e+07	2.64822e+07	2.92268e+07	5	5	5
NP_001894.2	catenin alpha-1 isoform 1 [OS=Homo sapiens]	0	273.677	49	34	188	34	906	100	6.29	429.23	34	Pf01044	1495	CTNNA1	5	ENSG00000044115.20	Arrhythmogenic Right Ventricular Cardiomyopathy; Apoptosis-related network due to altered Notch3 in ovarian cancer; VEGFA-VEGFR2 Signaling Pathway; White fat cell differentiation	Arrhythmogenic right ventricular cardiomyopathy (ARVC); Bacterial invasion of epithelial cells; Hippo signaling pathway; Adherens junction; Endometrial cancer; Tight junction; Leukocyte transendothelial migration; Pathways in cancer	Adherens junctions interactions; CDO in myogenesis; VEGFR2 mediated vascular permeability; RHO GTPases activate IQGAPs	27	0	1.186	1.105	0.926	0.354956	0.966527	0.728736	29.04	32.29	25.32	107.7	95.3	97	2.47	6.24	2.47	2.20842e+08	202563448	2.15103e+08	1.78223e+08	1.65331e+08	1.87181e+08	1.92823e+08	1.79868e+08	1.82834e+08	30	32	32
CAG38493.1	RAB1B [OS=Homo sapiens]	0	78.262	49	8	55	3	201	22.2	5.73	161.73	8	Pf00025, Pf00071, Pf01926, Pf04670, Pf08477, Pf09439	81876	RAB1B	11					0	0	1.094	1.484	1.391	0.869879	0.197138	0.0980693	23.07	44.88	30.92	125.8	112.5	61.8	3.21	8.19	47.09	6.5148e+07	5.94756e+07	6.58575e+07	5.84179e+07	5.02458e+07	4.64458e+07	1.61077e+07	4.40415e+07	2.99624e+07	3	3	3
EAW70563.1	X-ray repair complementing defective repair in Chinese hamster cells 5 (double-strand-break rejoining; Ku autoantigen, 80kDa), isoform CRA_b [OS=Homo sapiens]	0	336.516	49	34	241	34	827	93.5	8.1	583.53	34	Pf02735, Pf03730, Pf03731, Pf08785	7520	XRCC5	2					0	0	1.04	0.976	0.959	0.980377	0.83995	0.851784	29.78	26.53	24.03	87.3	109.2	103.5	5.84	9.85	7.74	6.14911e+08	5.68154e+08	6.56141e+08	6.5454e+08	6.71033e+08	7.34004e+08	6.67234e+08	6.95517e+08	7.56294e+08	26	28	29
EAW76289.1	RNA binding protein, autoantigenic (hnRNP-associated with lethal yellow homolog (mouse)), isoform CRA_c [OS=Homo sapiens]	0	115.992	49	12	52	2	317	33.7	9.45	133.2	12	Pf00076, Pf13893, Pf14259	22913	RALY	20					0	10	1.025	1.137	1.098	0.99773	0.91118	0.883272	17.1	25.82	22.04	92	102.4	105.6	9.55	6.49	6.06	1.52407e+08	1.13781e+08	1.22604e+08	1.24895e+08	1.19555e+08	1.31734e+08	1.50289e+08	1.34891e+08	1.30427e+08	9	10	10
NP_005907.3	DNA replication licensing factor MCM7 isoform 1 [OS=Homo sapiens]	0	249.595	49	28	193	28	719	81.3	6.46	491.66	28	Pf00493, Pf07728, Pf14551	4176	MCM7	7	ENSG00000166508.17	miRNA Regulation of DNA Damage Response; Cell Cycle; Retinoblastoma (RB) in Cancer; G1 to S cell cycle control; DNA Replication	DNA replication; Cell cycle	M/G1 Transition; Assembly of the pre-replicative complex; Unwinding of DNA; Regulation of DNA replication; Activation of ATR in response to replication stress; Activation of the pre-replicative complex; Orc1 removal from chromatin; Removal of licensing factors from origins	27	0	1.122	1.272	1.195	0.690423	0.645746	0.598474	24.92	24.82	28.04	110.9	104	85.1	11.87	10.29	10.57	1.77929e+08	1.96028e+08	2.02818e+08	1.60687e+08	1.65212e+08	1.82071e+08	1.28668e+08	1.47832e+08	1.54047e+08	25	25	25
NP_115721.1	partner of Y14 and mago isoform 1 [OS=Homo sapiens]	0	44.376	49	5	26	5	204	22.6	9.45	69.44	5	Pf09282	84305	WIBG; PYM1	12	ENSG00000170473.16		mRNA surveillance pathway; RNA transport		2	0	1.014	1.099	1.094	0.972967	0.968415	0.883272	18.91	35.53	31.84	103.9	103.5	92.6	5.78	5.24	43.09	1.35329e+07	1.22555e+07	1.43779e+07	1.28346e+07	1.24304e+07	1.21865e+07	1.04614e+07	1.12845e+07	2.12617e+07	3	4	3
NP_001226.2	serpin H1 precursor [OS=Homo sapiens]	0	168.739	48	14	102	2	418	46.4	8.69	295.77	14	Pf00079	871	SERPINH1	11	ENSG00000149257.13	Endochondral Ossification		Collagen biosynthesis and modifying enzymes	4	11	1.328	0.859	0.671	0.0154344	0.474712	0.00609946	29.26	31.66	25.5	102.5	80.6	116.9	13.49	16.35	21.65	1.35758e+08	1.49003e+08	1.66596e+08	9.42753e+07	1.10756e+08	1.18733e+08	1.2405e+08	1.75623e+08	1.85572e+08	13	13	13
AAA67526.1	MTHSP75 [OS=Homo sapiens]	0	296.546	48	29	288	29	679	73.7	6.3	677.88	29	Pf00012, Pf06723	3313	HSPA9	5		Parkin-Ubiquitin Proteasomal System pathway			1	0	0.856	1.014	1.151	0.17251	0.917292	0.727423	23.2	36.44	35.59	97.4	115.2	87.5	6.53	15.38	7.3	4.72741e+08	3.6834e+08	4.02746e+08	5.71683e+08	4.13736e+08	3.93548e+08	3.94636e+08	3.39816e+08	3.41187e+08	26	24	24
BAD96295.1	TATA binding protein interacting protein 49 kDa variant, partial [OS=Homo sapiens]	0	159.642	48	16	144	16	456	50.2	6.29	320.93	16	Pf00004, Pf01078, Pf01695, Pf05496, Pf06068, Pf06414, Pf07726, Pf13191, Pf13238, Pf13245, Pf13481	8607	RUVBL1	3		Gastric Cancer Network 1			1	0	0.954	0.993	1.063	0.778428	0.883937	0.94838	24.89	23.31	30.04	96.7	106.3	97	3.65	2.13	4.37	1.69699e+08	1.56271e+08	1.72919e+08	1.80074e+08	1.62193e+08	1.74223e+08	1.53757e+08	1.63355e+08	1.60723e+08	15	16	16
NP_003290.1	endoplasmin precursor [OS=Homo sapiens]	0	376.752	48	39	329	2	803	92.4	4.84	795.55	39	Pf00183, Pf02518, Pf13589	7184	HSP90B1	12	ENSG00000166598.14	Photodynamic therapy-induced unfolded protein response; Focal Adhesion-PI3K-Akt-mTOR-signaling pathway; Sudden Infant Death Syndrome (SIDS) Susceptibility Pathways	Thyroid hormone synthesis; Pathways in cancer; Estrogen signaling pathway; Prostate cancer; PI3K-Akt signaling pathway; Protein processing in endoplasmic reticulum	Post-translational protein phosphorylation; Regulation of Insulin-like Growth Factor (IGF) transport and uptake by Insulin-like Growth Factor Binding Proteins (IGFBPs); ATF6 (ATF6-alpha) activates chaperone genes; Interleukin-4 and 13 signaling; Trafficking and processing of endosomal TLR; Scavenging by Class A Receptors	26	34	0.958	0.873	0.916	0.791269	0.529617	0.700173	26.62	28.59	26.6	97.5	94.5	108	4.36	6.07	3.25	6.02927e+08	4.85303e+08	5.36049e+08	5.68655e+08	4.48312e+08	4.77286e+08	5.46314e+08	5.69003e+08	5.59708e+08	36	35	35
AAA36621.1	Small nuclear ribonucleoprotein E, partial [OS=Homo sapiens]	0	10.135	48	3	8	3	81	9.6	8.79	10.95	3	Pf01423	6635	SNRPE	1		mRNA Processing			1	0	0.926	1.004	1.073	0.867352	0.890905	0.97383	20.4	8.86	17.57	96.2	106.1	97.7	17.03	15.32	13.99	2.11624e+06	2.41991e+06	2.81749e+06	3.62833e+06	2521822	2.55623e+06	2.66725e+06	2540979	1.98799e+06	1	1	2
XP_016857913.1	PREDICTED: F-actin-capping protein subunit alpha-1 isoform X1 [OS=Homo sapiens]	0	76.622	48	10	62	1	318	36.5	5.85	143.93	10	Pf01267	829	CAPZA1	1					0	9	0.972	0.941	0.923	0.857798	0.763028	0.72241	31.6	27.83	23.69	97.5	101.9	100.6	11.63	6.25	5.65	5.74588e+07	5.95253e+07	6.86787e+07	6.26396e+07	5.88153e+07	6.58566e+07	63942849	6.34915e+07	6.89054e+07	10	10	10
NP_001307526.1	probable ATP-dependent RNA helicase DDX5 isoform b [OS=Homo sapiens]	0	244.41	48	28	219	21	614	69	8.85	423.43	28	Pf00270, Pf00271, Pf08061	1655	DDX5	17	ENSG00000108654.13				0	0	1.096	1.262	1.124	0.811295	0.670738	0.814294	19.18	22.57	23.07	109.1	100.9	90	2.65	1.07	8.93	2.66415e+08	2.2601e+08	2.59169e+08	2.35472e+08	2.02448e+08	2.14824e+08	1.74912e+08	2.03034e+08	1.96874e+08	19	19	18
NP_001895.1	catenin beta-1 isoform 1 [OS=Homo sapiens]	0	311.654	48	26	268	23	781	85.4	5.86	704.22	26	Pf00514	1499	CTNNB1	3	ENSG00000168036.16	Androgen receptor signaling pathway; MicroRNAs in cardiomyocyte hypertrophy; Heart Development; TNF related weak inducer of apoptosis (TWEAK) Signaling Pathway; Neural Crest Differentiation; Arrhythmogenic Right Ventricular Cardiomyopathy; Pathogenic Escherichia coli infection; Corticotropin-releasing hormone signaling pathway; Adipogenesis; Gastric cancer network 2; Brain-Derived Neurotrophic Fa…	Tight junction; Melanogenesis; Prostate cancer; Basal cell carcinoma; Breast cancer; Leukocyte transendothelial migration; Hippo signaling pathway; Focal adhesion; Arrhythmogenic right ventricular cardiomyopathy (ARVC); HTLV-I infection; Signaling pathways regulating pluripotency of stem cells; Pathways in cancer; Bacterial invasion of epithelial cells; Endometrial cancer; Proteoglycans in cancer…	Beta-catenin phosphorylation cascade; CDO in myogenesis; Binding of TCF/LEF:CTNNB1 to target gene promoters; Apoptotic cleavage of cell adhesion proteins; RUNX3 regulates WNT signaling; S37 mutants of beta-catenin aren't phosphorylated; LRR FLII-interacting protein 1 (LRRFIP1) activates type I IFN production; Ca2+ pathway; S33 mutants of beta-catenin aren't phosphorylated; Disassembly of the dest…	107	3	1.383	1.588	1.138	0.00291721	0.09414	0.774127	48.17	46.5	45.58	127.1	95.2	77.7	21.33	25.79	26.85	5.75151e+08	7.52951e+08	8.08351e+08	3.6808e+08	5.30216e+08	5.56376e+08	2.89423e+08	4.79723e+08	4.65921e+08	25	28	27
AAH62716.1	Ribosomal protein L23 [OS=Homo sapiens]	0	104.266	48	9	108	9	140	14.9	10.62	317.13	9	Pf00238	9349	RPL23	17		Cytoplasmic Ribosomal Proteins			1	0	0.974	1.065	1.083	0.859975	0.989141	0.906849	19.42	21.75	17.61	99.1	104.4	96.6	2.36	2.39	1.58	2.04206e+08	1.78821e+08	2.02203e+08	2.07909e+08	1.73849e+08	1.88159e+08	1.83035e+08	1.84684e+08	1.78806e+08	9	8	8
AAH13296.1	Ribosomal protein s6 [OS=Homo sapiens]	0	189.488	48	13	158	2	249	28.7	10.9	347.28	13	Pf01092	6194	RPS6	9		IL-5 Signaling Pathway; Human Thyroid Stimulating Hormone (TSH) signaling pathway; Leptin signaling pathway; Follicle Stimulating Hormone (FSH) signaling pathway; Prolactin Signaling Pathway; Interleukin-11 Signaling Pathway; Oncostatin M Signaling Pathway; Brain-Derived Neurotrophic Factor (BDNF) signaling pathway; Kit receptor signaling pathway; VEGFA-VEGFR2 Signaling Pathway; Cytoplasmic Ribos…			13	12	0.98	1.085	1.133	0.87434	0.984352	0.791171	21.1	26.79	24	97.7	103.4	98.9	5.91	3.19	10.57	9.60726e+08	7.45634e+08	8.746e+08	9.59084e+08	7.91188e+08	8.50711e+08	9.65193e+08	7.66685e+08	8.358e+08	14	14	13
AAB61466.1	P21-Arc [OS=Homo sapiens]	0	53.497	48	7	43	7	178	20.5	8.59	110.92	7	Pf04062	10094	ARPC3	12		Pathogenic Escherichia coli infection			1	0	1.102	1.217	1.116	0.869879	0.772162	0.835089	22.58	20.16	20.61	111	97.1	91.9	3.6	8.57	14.31	4.49768e+07	3.82209e+07	4.46271e+07	3.30506e+07	3.24714e+07	3.63693e+07	26854874	3.36135e+07	3.4295e+07	7	7	7
BAD92708.1	ribosomal protein L12 variant, partial [OS=Homo sapiens]	0	109.83	48	9	110	2	197	21.5	10.1	349.42	9	Pf00298, Pf03946	100130447	RPL12P16	2					0	7	1.009	0.982	0.973	0.968349	0.854522	0.883272	24.85	22.43	22.12	96.9	102.9	100.2	5.64	1.02	5.96	1.97022e+08	1.53691e+08	1.76084e+08	1.82524e+08	1.63248e+08	1.71878e+08	1.92502e+08	1.68572e+08	1.71822e+08	9	9	9
Q9UMY4.3	RecName: Full=Sorting nexin-12 [OS=Homo sapiens]	0	28.297	48	7	31	6	172	19.7	7.87	32.09	7	Pf00787	29934	SNX12	X			Endocytosis		1	0	1.011	1.083	1.072	0.950479	0.987276	0.93111	19.28	29.72	27.11	106.5	101.7	91.8	5.48	13.01	8.97	4.38628e+07	3.44219e+07	3.87505e+07	3.94692e+07	2.66941e+07	3.39747e+07	3.43463e+07	3.17437e+07	2.79457e+07	6	6	6
P30044.4	RecName: Full=Peroxiredoxin-5, mitochondrial; AltName: Full=Alu corepressor 1; AltName: Full=Antioxidant enzyme B166; Short=AOEB166; AltName: Full=Liver tissue 2D-page spot 71B; AltName: Full=PLP; AltName: Full=Peroxiredoxin V; Short=Prx-V; AltName: Full=Peroxisomal antioxidant enzyme; AltName: Full=TPx type VI; AltName: Full=Thioredoxin peroxidase PMP20; Flags: Precursor [OS=Homo sapiens]	0	58.118	48	7	31	7	214	22.1	8.7	73.55	7	Pf00578, Pf08534	25824	PRDX5	11	ENSG00000126432.13	Selenium Micronutrient Network	Peroxisome	Detoxification of Reactive Oxygen Species	5	0	0.882	0.766	0.887	0.533387	0.176842	0.57692	43.99	37.92	39.81	71.9	102.4	125.7	35.26	22.21	24	3.91671e+07	1.96719e+07	2.07154e+07	4.1626e+07	2.64912e+07	2.58068e+07	4.9349e+07	3.06061e+07	3.53095e+07	6	5	6
NP_001013269.1	4F2 cell-surface antigen heavy chain isoform f [OS=Homo sapiens]	0	224.263	48	19	158	19	529	57.9	5.35	527.21	19	Pf00128	6520	SLC3A2	11	ENSG00000168003.16				0	0	0.746	0.962	1.279	0.00112884	0.805793	0.318773	26.02	33.62	27.09	88.8	116.6	94.6	11	10.42	3.67	3.06861e+08	2.17948e+08	2.49127e+08	3.71553e+08	2.66649e+08	3.00265e+08	2.57552e+08	236532204	2.50206e+08	16	16	18
AAG39280.1	MSTP029 [OS=Homo sapiens]	0	116.689	48	16	78	16	475	51.4	9.41	197.85	16	Pf00108, Pf00109, Pf02803	3032	HADHB	2		Fatty Acid Beta Oxidation			1	0	1.055	1.013	0.955	0.966759	0.914951	0.83583	33.33	33.28	31.45	98.9	92.9	108.1	14.84	18.99	7.16	6.57748e+07	4.33445e+07	5.10895e+07	6.21505e+07	3.83888e+07	4.40727e+07	5.09371e+07	5.75465e+07	5.26604e+07	14	13	14
NP_005795.2	ATP-dependent RNA helicase DDX39A [OS=Homo sapiens]	0	158.777	48	17	150	6	427	49.1	5.68	333.81	17	Pf00270, Pf00271, Pf14617	10212	DDX39A	19	ENSG00000123136.14			Cleavage of Growing Transcript in the Termination Region ; Transport of Mature mRNA derived from an Intron-Containing Transcript; mRNA 3'-end processing	9	0	0.916	0.994	1.055	0.594682	0.88775	0.962481	22.95	32.48	28.14	104.3	109	86.6	17.18	3.3	22.31	7.06643e+07	7.46215e+07	5.77153e+07	7.25041e+07	60915742	6.30463e+07	5.40247e+07	5.99025e+07	3.76755e+07	4	4	4
EAW93399.1	hCG1782414 [OS=Homo sapiens]	0	49.305	48	7	52	7	160	18.5	10.49	93.99	7	Pf01157	100131205	RPL21P28	1					0	0	0.923	1.383	1.321	0.602814	0.373609	0.213349	43.32	39.75	37.71	105	109.6	85.4	5.23	3.43	4.14	2.13409e+08	1.73906e+08	1.83031e+08	1.95526e+08	1.68162e+08	1.90019e+08	1.49244e+08	1.3721e+08	1.47357e+08	7	7	7
EAW56827.1	heterogeneous nuclear ribonucleoprotein L, isoform CRA_b [OS=Homo sapiens]	0	262.111	47	21	159	20	590	64.2	8.22	439.27	21	Pf00076, Pf13893, Pf14259	3191	HNRNPL	19		mRNA Processing			1	1	1.11	0.892	0.839	0.754446	0.602276	0.346097	30.18	37.62	30.52	95.2	86.9	117.8	0.95	5.93	1.95	3.00241e+08	2.57228e+08	2.82907e+08	2.31709e+08	2.26659e+08	2.37311e+08	3.38963e+08	3.43825e+08	3.30293e+08	18	18	19
AAA60288.1	Ribosomal protein s6 [OS=Homo sapiens]	0	167.66	47	12	143	1	249	28.7	10.9	314.84	12	Pf01092	6194	RPS6	9		IL-5 Signaling Pathway; Human Thyroid Stimulating Hormone (TSH) signaling pathway; Leptin signaling pathway; Follicle Stimulating Hormone (FSH) signaling pathway; Prolactin Signaling Pathway; Interleukin-11 Signaling Pathway; Oncostatin M Signaling Pathway; Brain-Derived Neurotrophic Factor (BDNF) signaling pathway; Kit receptor signaling pathway; VEGFA-VEGFR2 Signaling Pathway; Cytoplasmic Ribos…			13	0	1.344	1.145	0.791	0.604515	0.924934	0.208445	17.52	10.69	26.96	114.6	85.3	100.1	4.21	22.84	14.39		4.05147e+06	4.15136e+06	2.2394e+06	2.76391e+06	3.31612e+06	3380393	4339418	3.52424e+06		1	1
EAW79789.1	hCG1777176, isoform CRA_b [OS=Homo sapiens]	0	66.196	47	9	100	1	152	17.7	10.86	176.78	9	Pf00416	100131863	RPS18P5	3					0	0	0.958	1.226	1.28	0.839068	0.753401	0.31652	32.97	29.02	5.01	101.2	112.4	86.4	26.26	13.44	13.62	65641180	34667456	44786608	49287572	34194928	46483808	29826032	36345572	37852268	1	1	1
AAA35922.1	G protein beta subunit [OS=Homo sapiens]	0	108.697	47	12	91	9	340	37.3	6.18	216.57	12	Pf00400	2783	GNB2	7		Corticotropin-releasing hormone signaling pathway; Myometrial Relaxation and Contraction Pathways; G Protein Signaling Pathways; Calcium Regulation in the Cardiac Cell			4	3	0.996	1.099	1.102	0.925362	0.968415	0.875036	26.03	24.96	23.26	105	101.1	93.9	3.88	11.02	4.3	1.1716e+08	9.49256e+07	1.0542e+08	1.20255e+08	8.81368e+07	9.21258e+07	9.72628e+07	8.95062e+07	8.7252e+07	9	9	10
AAQ18036.1	Transformation-related protein 14 [OS=Homo sapiens]	0	90.288	47	10	39	10	394	42.8	5.82	91.79	10	Pf00561, Pf03096, Pf12697	10397	NDRG1	8		VEGFA-VEGFR2 Signaling Pathway			1	0	0.592	0.73	1.211	1.17649e-05	0.106377	0.542674	35.71	35.16	37.35	76.5	117.8	105.7	19.7	39.05	25.12	3.50332e+07	2.17515e+07	2.44164e+07	6.93435e+07	3.26445e+07	3.41504e+07	4.49004e+07	3.20715e+07	2.69957e+07	7	7	7
XP_005268405.1	PREDICTED: glucosamine-6-phosphate isomerase 1 isoform X1 [OS=Homo sapiens]	0	112.511	47	10	51	10	318	36.1	7.61	189.34	10	Pf01182	10007	GNPDA1	5					0	0	0.952	0.888	0.923	0.818333	0.590423	0.72241	32.71	35.39	18.02	93.3	100.7	106	21.48	13.49	8.18	4.84185e+07	2.89521e+07	3.31741e+07	4.23639e+07	2.86891e+07	3.29087e+07	3.65522e+07	3.77757e+07	3.1867e+07	9	9	9
AAA61298.1	transfer RNA-Trp synthetase [OS=Homo sapiens]	0	184.926	47	13	126	13	471	53.1	6.11	379.33	13	Pf00458, Pf00579	7453	WARS	14		Photodynamic therapy-induced unfolded protein response; Tryptophan metabolism			2	0	0.875	0.682	0.795	0.270488	0.0432778	0.174199	25.43	42.89	31.82	94.4	93.2	112.3	4.12	18.06	20.77	1.33299e+08	1.10866e+08	1.16652e+08	1.57124e+08	1.03398e+08	1.06773e+08	1.94246e+08	1.36281e+08	1.33069e+08	12	12	12
ABD14420.1	eukaryotic translation elongation factor 1 gamma, partial [OS=Homo sapiens]	0	42.325	47	3	54	1	87	9.6	6.77	131.79	3	Pf02798, Pf13409, Pf13417	1937	EEF1G	11		Translation Factors			1	0	0.929	0.874	0.98	0.802135	0.536752	0.897247	7.61	6.8	11.99	93.4	99.9	106.8	4.2	9.91	7.51	12366486	9929721	11203056	11506364	1.04089e+07	12790994	1.1491e+07	13090158	12083343	1	1	1
EAW80221.1	myosin ID, isoform CRA_a [OS=Homo sapiens]	0	222.287	47	35	164	35	1021	117.7	9.41	333.48	35	Pf00063, Pf06017	4642	MYO1D	17					0	0	1.277	1.317	1.03	0.0608511	0.527322	0.997409	23.46	29.2	18.82	125.5	91.2	83.3	3.87	3.41	3.38	2.03458e+08	1.70341e+08	2.00166e+08	1.45945e+08	1.21898e+08	1.26835e+08	1.2032e+08	1.26153e+08	1.2102e+08	31	31	33
AAV38549.1	protein phosphatase 1, catalytic subunit, beta isoform [OS=Homo sapiens]	0	131.836	47	13	96	5	327	37.1	6.19	238.25	13	Pf00149	5500	PPP1CB	2		G13 Signaling Pathway			1	0	1.092	0.982	0.868	0.881607	0.854118	0.491092	23.17	31.52	16.06	102.2	89.3	108.5	9.17	7.3	28.5	5.49454e+07	4.48472e+07	4.34207e+07	4.22038e+07	4.07207e+07	3.73813e+07	55643085	3.02968e+07	4.88066e+07	5	5	5
AAB02546.1	Gu protein, partial [OS=Homo sapiens]	0	287.529	47	34	165	33	801	89.2	9.32	372.54	34	Pf00270, Pf00271, Pf08152, Pf14617	9188	DDX21	10					0	1	0.955	0.937	0.994	0.784281	0.753401	0.929397	29.96	31.36	28.42	102	100.5	97.5	1.66	7.66	8.32	1.4609e+08	1.25886e+08	1.34206e+08	1.51954e+08	1.16922e+08	1.23888e+08	1.44242e+08	1.21523e+08	1.23405e+08	28	30	30
CAG33182.1	ATOX1 [OS=Homo sapiens]	0	50.622	47	3	34	3	68	7.4	7.24	72.45	3	Pf00403	475	ATOX1	5					0	0	0.992	0.992	1.029	0.915175	0.88306	0.995721	23.54	18.73	38.44	101.4	92	106.6	12.88	9.91	6.93	69965026	4.8522e+07	5.44226e+07	4.88938e+07	5.00522e+07	44305402	5.54899e+07	4.96475e+07	5.65668e+07	3	3	3
XP_005260640.1	PREDICTED: mRNA export factor isoform X3 [OS=Homo sapiens]	0	83.735	47	11	46	11	406	45	8.12	119.21	11	Pf00400	8480	RAE1	20					0	0	1.059	1.064	1.002	0.949488	0.988452	0.94838	28.99	25.2	22.9	109.8	93.4	96.8	7.1	7.72	6.67	66002586	5.02103e+07	5.71024e+07	5.13405e+07	3.85726e+07	4.46372e+07	4.51911e+07	5.06171e+07	4.74829e+07	9	10	10
NP_001025189.1	adenine phosphoribosyltransferase isoform b [OS=Homo sapiens]	0	39.103	47	5	28	5	134	14.5	7.34	37.64	5	Pf00156	353	APRT	16	ENSG00000198931.10				0	0	1.169	1.03	0.854	0.579406	0.948728	0.418525	23.32	25.09	27.92	97.8	94.3	107.9	10.56	13.51	4.04	8.23105e+07	59905512	6.56745e+07	6.95651e+07	4.64527e+07	5.81447e+07	7.02291e+07	7.09147e+07	6.49653e+07	5	5	5
NP_079472.1	GrpE protein homolog 1, mitochondrial precursor [OS=Homo sapiens]	0	45.945	47	6	29	6	217	24.3	8.12	41.98	6	Pf01025	80273	GRPEL1	4	ENSG00000109519.12			Mitochondrial protein import; Metabolism of proteins	2	0	0.991	1.219	1.362	0.915175	0.768555	0.137668	27.42	40.78	41.8	102.2	89.1	108.7	18.39	15.11	8.09	2.82705e+07	2.29595e+07	1.86082e+07	2.58247e+07	1.89143e+07	1.78122e+07	2.30488e+07	2.52434e+07	2.63273e+07	5	6	5
NP_001291417.1	mitochondrial import inner membrane translocase subunit Tim9 isoform b [OS=Homo sapiens]	0	12.238	47	2	11	2	66	7.6	5.06	27.25	2	Pf02953	26520	TIMM9	14	ENSG00000100575.13				0	0	1.047	1.015	1.061	0.99773	0.91118	0.974964	24.15	23.58	34.9	103.2	102.5	94.4	12.73	24.45	27.27	5.19336e+06	3.82376e+06	3.86697e+06	5.94895e+06	3.4114e+06	3.79487e+06	4.73003e+06	3.61436e+06	2.63442e+06	2	2	2
NP_001753.1	t-complex protein 1 subunit zeta isoform a [OS=Homo sapiens]	0	217.277	47	22	186	22	531	58	6.68	316.11	22	Pf00118, Pf05504	908	CCT6A	7	ENSG00000146731.10			Prefoldin mediated transfer of substrate to CCT/TriC; Cooperation of PDCL (PhLP1) and TRiC/CCT in G-protein beta folding; Association of TriC/CCT with target proteins during biosynthesis; Formation of tubulin folding intermediates by CCT/TriC; Folding of actin by CCT/TriC	9	0	0.946	0.983	1.021	0.73576	0.85749	0.982272	22.61	25.95	21.57	98.4	101.5	100.1	3.63	1.64	5.37	3.72436e+08	3.06697e+08	3.31178e+08	3.48032e+08	2.95546e+08	3.16167e+08	3.48202e+08	3.06551e+08	3.19965e+08	21	20	20
AAA60236.1	Ubiquinone-binding protein [OS=Homo sapiens]	0	14.533	47	4	9	4	111	13.5	8.78	20.07	4	Pf02271	7381	UQCRB	8		Electron Transport Chain			1	0	0.94	1.496	1.585	0.839147	0.252873	0.0151821	32.43	35.36	63.07	118.1	122.5	59.3	9.49	24.24	36.97	5.268e+06	4.90602e+06	6.01634e+06	7.44423e+06	4.80639e+06	4.34016e+06	2597877	1.95484e+06	3.95907e+06	3	3	3
NP_002070.1	Aspartate aminotransferase, cytoplasmic [OS=Homo sapiens]	0	101.194	47	12	56	12	413	46.2	7.01	132.89	12	Pf00155	2805	GOT1	10	ENSG00000120053.10	Alanine and aspartate metabolism; Trans-sulfuration pathway; Amino Acid metabolism; Glycolysis and Gluconeogenesis	Alanine, aspartate and glutamate metabolism; Arginine biosynthesis; Cysteine and methionine metabolism; Biosynthesis of amino acids; Carbon metabolism; Phenylalanine, tyrosine and tryptophan biosynthesis; Arginine and proline metabolism; 2-Oxocarboxylic acid metabolism; Metabolic pathways; Phenylalanine metabolism; Tyrosine metabolism	Gluconeogenesis; Amino acid synthesis and interconversion (transamination); Methionine salvage pathway	24	0	1.042	0.938	0.916	0.993345	0.755163	0.699067	16.2	25.76	23.72	101.3	96.4	102.2	6.35	11.18	9.07	6.62534e+07	5.10452e+07	5.82145e+07	6.32486e+07	4.46478e+07	5.08962e+07	6.28781e+07	5.57996e+07	5.10672e+07	11	11	11
NP_002856.1	Ras-related protein Rab-2A isoform a [OS=Homo sapiens]	0	59.281	47	8	37	8	212	23.5	6.54	99.34	8	Pf00009, Pf00025, Pf00071, Pf01926, Pf04670, Pf08477	5862	RAB2A	8	ENSG00000104388.14	Focal Adhesion-PI3K-Akt-mTOR-signaling pathway	AMPK signaling pathway	Golgi Cisternae Pericentriolar Stack Reorganization; RAB geranylgeranylation	10	0	0.872	0.946	1.007	0.549596	0.779515	0.957491	27.2	29.17	23.42	92	113.4	94.6	9.17	8.51	17.58	1.85029e+07	1.41219e+07	1.48125e+07	18063196	1.64329e+07	1.96532e+07	1.53054e+07	15366500	1.09154e+07	8	7	7
NP_919415.2	vesicle-associated membrane protein-associated protein A isoform 2 [OS=Homo sapiens]	0	111.679	47	11	96	10	249	27.9	8.62	167.03	11	Pf00635	9218	VAPA	18	ENSG00000101558.13	Exercise-induced Circadian Regulation	Tight junction	Neutrophil degranulation; Sphingolipid de novo biosynthesis	9	1	1	1.159	1.049	0.937132	0.880326	0.976519	21.82	25.32	21.42	106.6	112.3	81.1	2.29	2.53	12.4	1.34918e+08	1.12863e+08	1.23685e+08	1.31558e+08	1.13266e+08	1.16047e+08	9.12604e+07	8.72648e+07	1.07906e+08	10	10	10
EAW99816.1	hypothetical protein FLJ14668, isoform CRA_b [OS=Homo sapiens]	0	74.239	47	6	53	6	161	18	8.25	139.67	6	Pf05811	84908	FAM136A	2					0	0	0.979	1.107	1.475	0.872027	0.961785	0.0317285	31.21	96.06	64.15	122.4	131.3	46.3	11.33	11.1	13.79	9.20512e+07	1.00641e+08	9.65554e+07	9.16044e+07	1.0037e+08	9.51558e+07	4.28007e+07	3.23172e+07	3.44789e+07	5	5	5
AFD36924.1	MHC class I antigen, partial [OS=Homo sapiens]	0	56.883	46	9	49	1	181	20.9	6.7	77.34	9	Pf00129								0	3	0.648	1.084	1.49	3.55318e-05	0.985012	0.0255914	15.59	40.31	28.6	84.3	157.9	57.8	5.22	27.02	28.77	4.61861e+07	3.7826e+07	3.95675e+07	95680715	6.69156e+07	50869922	41342928	2.41934e+07	2.65827e+07	2	3	3
BAG51639.1	unnamed protein product [OS=Homo sapiens]	0	26.814	46	3	10	3	153	17	6.02	29.16	3	Pf04699	81873	ARPC5L	9		Pathogenic Escherichia coli infection	Bacterial invasion of epithelial cells; Endocytosis; Fc gamma R-mediated phagocytosis; Pathogenic Escherichia coli infection; Shigellosis; Salmonella infection; Regulation of actin cytoskeleton		8	0	1.14	0.912	0.911	0.876209	0.678643	0.679571	23.93	19.18	23.71	103.2	88.6	108.2	7.53	20.73	10.53	6.65044e+06	6.21022e+06	7.33505e+06	5532291	5.0335e+06	7.35144e+06	5.71006e+06	6728845	6736142	2	2	2
EAW55544.1	histone 1, H4e [OS=Homo sapiens]	0	186.889	46	16	210	16	138	15.3	11.66	569.67	16	Pf00125, Pf02969, Pf15630	8367	HIST1H4E	6					0	0	1.193	1.048	0.839	0.323271	0.969763	0.346239	27.57	28.19	31.7	106.8	86.2	106.9	6.4	14.13	9.23	1.24957e+09	9.59734e+08	1.12579e+09	1.09241e+09	7.33758e+08	8.34399e+08	1.18332e+09	1.07072e+09	9.56326e+08	15	15	16
BAB79460.1	ribosomal protein L14 [OS=Homo sapiens]	0	104.883	46	12	106	12	220	23.8	10.93	165.97	12	Pf01929	9045	RPL14	3		Cytoplasmic Ribosomal Proteins			1	0	0.948	1.056	1.118	0.75285	0.98095	0.833487	24.45	25.2	22.65	101	105.9	93.1	1.26	1.13	4.2	2.54678e+08	2.25463e+08	2.47958e+08	2.57472e+08	2.2079e+08	2.36246e+08	2.19217e+08	2.08763e+08	2.25003e+08	10	10	10
EAW52359.1	ribosomal protein L18, isoform CRA_b [OS=Homo sapiens]	0	66.88	46	12	92	1	164	18.7	11.59	178.76	12	Pf00828	6141	RPL18	19	ENSG00000063177.12	Cytoplasmic Ribosomal Proteins			1	0	1.254	0.978	0.677	0.420225	0.845267	0.00738313	9.11	7.86	22.24	106.6	85.7	107.7	3.72	11.66	15.55	33891568	31244380	34577924	27309204	23748390	20451452	42161196	32632472	31032922	1	1	1
NP_005554.1	stathmin isoform a [OS=Homo sapiens]	0	43.84	46	8	45	8	149	17.3	5.97	56.54	8	Pf00836, Pf09726	3925	STMN1	1	ENSG00000117632.22	Regulation of Microtubule Cytoskeleton; Retinoblastoma (RB) in Cancer; Rac1/Pak1/p38/MMP-2 pathway; MAPK Signaling Pathway; EGF/EGFR Signaling Pathway	MAPK signaling pathway; MicroRNAs in cancer		7	0	1.174	1.117	1.029	0.422853	0.944697	0.995658	20.76	28.74	22.84	110.4	97.3	92.3	13.25	10.5	7.23	1.81239e+08	2.03462e+08	2.15497e+08	1.68745e+08	1.82697e+08	1.74532e+08	1.54994e+08	1.7376e+08	1.7007e+08	8	8	7
AAD17527.1	Leucine aminopeptidase [OS=Homo sapiens]	0	122.076	46	16	68	16	519	56	7.69	159.49	16	Pf00883, Pf02789	51056	LAP3	4					0	0	0.95	1.072	1.042	0.80006	0.999611	0.985052	28.47	26.14	27.38	126.3	99.9	73.9	16.13	14.04	17.95	6.60614e+07	5.25482e+07	4.53249e+07	5.48225e+07	3.70922e+07	4.15121e+07	3.35588e+07	2.32691e+07	31531908	16	14	14
AAA60279.1	Ribosomal protein L26 [OS=Homo sapiens]	0	51.828	46	9	52	9	145	17.3	10.55	51.41	9	Pf00467	6154	RPL26	17		Cytoplasmic Ribosomal Proteins			1	0	1.059	1.196	1.188	0.915175	0.803372	0.61932	17.72	17.07	17.78	105.1	104.5	90.4	1.51	6.03	3.27	2.82179e+08	2.41861e+08	2.71044e+08	2.63633e+08	2.40529e+08	2.25708e+08	2.28572e+08	2.09959e+08	2.17339e+08	9	9	9
NP_005150.1	actin, alpha cardiac muscle 1 precursor [OS=Homo sapiens]	0	382.329	46	20	728	6	377	42	5.39	1396.65	20	Pf00022	70	ACTC1	15	ENSG00000159251.6	Cardiac Progenitor Differentiation; Myometrial Relaxation and Contraction Pathways; Striated Muscle Contraction	Dilated cardiomyopathy; Cardiac muscle contraction; Hypertrophic cardiomyopathy (HCM); Adrenergic signaling in cardiomyocytes	Striated Muscle Contraction	9	0	1.105	1.111	0.772	0.769519	0.955242	0.110775	57.56	71.28	51.81	129.2	83.5	87.3	33.8	8.03	31.39	5.34029e+08	2.31921e+08	3.72149e+08	2.51677e+08	1.88059e+08	2.20817e+08	2.30812e+08	3.86446e+08	2.37102e+08	4	5	4
NP_002559.2	Polyadenylate-binding protein 1 [OS=Homo sapiens]	0	246.843	46	29	225	20	636	70.6	9.5	465.81	29	Pf00076, Pf00658, Pf13893, Pf14259	26986	PABPC1	8	ENSG00000070756.15	Translation Factors; Endoderm Differentiation	RNA transport; mRNA surveillance pathway; RNA degradation	AUF1 (hnRNP D0) binds and destabilizes mRNA; L13a-mediated translational silencing of Ceruloplasmin expression; Regulation of expression of SLITs and ROBOs; Nonsense Mediated Decay (NMD) independent of the Exon Junction Complex (EJC); Translation initiation complex formation; Nonsense Mediated Decay (NMD) enhanced by the Exon Junction Complex (EJC); Deadenylation of mRNA	24	9	1.1	1.084	0.992	0.789862	0.985514	0.924192	19.39	26.26	16.27	107.3	97.2	95.5	4.91	3.02	0.99	5.47584e+08	4.33738e+08	4.91043e+08	4.5612e+08	3.76794e+08	4.08304e+08	4.17294e+08	4.16809e+08	4.12006e+08	27	27	26
EAX05823.1	annexin A3, isoform CRA_b [OS=Homo sapiens]	0	135.803	46	16	138	16	352	39.8	7.18	316.78	16	Pf00191	306	ANXA3	4		Prostaglandin Synthesis and Regulation			1	0	0.924	0.824	0.881	0.604515	0.350194	0.549767	28.94	26.75	21.96	90.1	96.7	113.2	13.54	13.37	4.52	1.98992e+08	1.37851e+08	1.51354e+08	1.95754e+08	1.34303e+08	1.4914e+08	1.92515e+08	1.80719e+08	1.711e+08	14	14	15
NP_001258522.1	protein phosphatase methylesterase 1 isoform b [OS=Homo sapiens]	0	106.066	46	13	108	13	400	43.8	5.85	280.58	13	Pf00561, Pf12695, Pf12697	51400	PPME1	11	ENSG00000214517.9				0	0	1.18	1.164	0.985	0.389134	0.869094	0.908466	46.91	58.72	48.83	117.7	95.2	87.1	37.37	34.74	37.94	74847490	1.39882e+08	1.51798e+08	6.24474e+07	1.12232e+08	1.12806e+08	5.1941e+07	1.06706e+08	1.12364e+08	12	13	13
CAG47015.1	G22P1 [OS=Homo sapiens]	0	313.139	46	29	255	1	609	69.8	6.64	562.91	29	Pf02037, Pf02735, Pf03730, Pf03731	2547	XRCC6	22					0	0	0.955	1.222	1.263	0.869879	0.761517	0.366816	30.15	29.54	20.89	97.6	113	89.4	25.76	14.66	18.41	7510620	7311731	1.14185e+07	9.12023e+06	6.48302e+06	9199685	5.65903e+06	8061772	6.87523e+06	1	1	1
NP_001288160.1	high mobility group protein B3 isoform b [OS=Homo sapiens]	0	83.58	46	10	58	10	220	25.5	9.06	121.5	10	Pf00505, Pf09011	3149	HMGB3	X					0	0	1.043	1.071	1.066	0.980794	0.999203	0.941941	22.72	33.35	25.67	102.4	95.3	102.3	4.81	4.93	7.2	8.64114e+07	7.0631e+07	8.44536e+07	8.18431e+07	6.63522e+07	6.94521e+07	8.38671e+07	7.78735e+07	70651694	9	9	9
NP_006232.1	protein phosphatase inhibitor 2 isoform 2 [OS=Homo sapiens]	0	87.66	46	9	55	9	205	23	4.74	97.29	9	Pf04979	5504	PPP1R2	3	ENSG00000184203.7				0	0	1.346	1.216	0.885	0.0246863	0.776003	0.566159	22.87	21.77	26.03	112.9	92.2	94.9	17.53	11.3	7.2	6.31751e+07	7.4435e+07	8.42438e+07	54959413	6.00957e+07	6.07371e+07	5.89427e+07	6.46938e+07	6.58064e+07	6	8	8
NP_002122.1	high mobility group protein HMG-I/HMG-Y isoform b [OS=Homo sapiens]	0	38.902	46	4	56	1	96	10.7	10.32	113.5	4		3159	HMGA1	6	ENSG00000137309.19	Adipogenesis; Preimplantation Embryo; Senescence and Autophagy in Cancer			3	0	1.233	1.264	1.017	0.286357	0.667206	0.976794	27.24	45.25	51.94	122.7	102.6	74.7	22.86	23.07	42.05	96171089	68741274	57278213	73319741	54323341	4.23331e+07	86435467	43073104	42968999	1	1	1
NP_055205.2	staphylococcal nuclease domain-containing protein 1 [OS=Homo sapiens]	0	345.879	46	32	245	32	910	101.9	7.17	642.44	32	Pf00565, Pf00567	27044	SND1	7	ENSG00000197157.10		Epstein-Barr virus infection; Viral carcinogenesis	Signaling by BRAF and RAF fusions	6	0	0.936	0.913	0.968	0.667685	0.678643	0.878768	26.29	25.45	22.55	103	95.3	101.7	9.2	3.51	5.75	2.90039e+08	2.52659e+08	2.33454e+08	2.6521e+08	2.20773e+08	2.30282e+08	2.6393e+08	2.33369e+08	2.56e+08	31	30	30
BAA25818.1	ribosomal protein S11, partial [OS=Homo sapiens]	0	45.943	46	4	56	4	83	9.9	10.68	147.36	4	Pf00366	6205	RPS11	19		Cytoplasmic Ribosomal Proteins			1	0	1.166	1.207	1.027	0.470151	0.79448	0.993203	15.23	18.79	15.76	102.9	97.8	99.3	4.26	5.32	9.55	1.98658e+08	188188675	1.92858e+08	197786546	1.59138e+08	1.66823e+08	2.05569e+08	167886981	1.75533e+08	4	4	4
XP_005265952.1	PREDICTED: heterogeneous nuclear ribonucleoprotein H isoform X1 [OS=Homo sapiens]	0	179.142	46	15	151	9	472	51.2	6.8	393.46	15	Pf00076, Pf08080, Pf14259	3187	HNRNPH1	5; CHR_HG30_PATCH	ENSG00000169045.17; ENSG00000284254.1	Mecp2 and Associated Rett Syndrome; mRNA Processing			2	6	1.059	1.028	0.98	0.915849	0.94478	0.895798	30.09	34.48	26.02	111.6	94.2	94.3	3.09	9.47	2.77	4.15928e+08	3.43036e+08	3.7637e+08	3.5944e+08	2.636e+08	2.91757e+08	3.23079e+08	3.01662e+08	2.99934e+08	14	14	14
EAW71815.1	ribosomal protein S4, X-linked, isoform CRA_a [OS=Homo sapiens]	0	229.41	46	21	218	21	385	43.4	9.95	528.18	21	Pf00900, Pf08071	6191	RPS4X	X		Cytoplasmic Ribosomal Proteins			1	0	1.104	1.184	1.09	0.775657	0.828189	0.89087	32.71	33.39	34.42	109.8	99.6	90.6	5.8	5.79	5.65	6.31306e+08	5.01315e+08	5.40963e+08	5.27559e+08	4.13212e+08	4.54441e+08	4.67455e+08	4.09972e+08	4.2428e+08	19	20	20
NP_060090.2	interleukin enhancer-binding factor 3 isoform d [OS=Homo sapiens]	0	294.476	46	28	208	26	898	95.7	8.81	434.22	28	Pf00035, Pf07528, Pf14709	3609	ILF3	19	ENSG00000129351.17				0	2	1.101	1.15	1.056	0.789592	0.890905	0.961568	26.38	30.15	26.77	103.6	101.1	95.3	2.08	1.56	4.59	3.7604e+08	3.15705e+08	3.54621e+08	3.49989e+08	3.00425e+08	3.1497e+08	3.259e+08	2.91668e+08	3.07683e+08	26	25	26
XP_011511565.1	PREDICTED: GMP synthase [glutamine-hydrolyzing] isoform X1 [OS=Homo sapiens]	0	203.78	46	22	136	3	699	77.4	6.98	352.32	22	Pf00117, Pf00733, Pf00958, Pf01171, Pf02540, Pf03054, Pf06508, Pf07722	8833	GMPS	3					0	19	1.084	1.095	1.017	0.854054	0.971016	0.976794	20.28	18.93	16.96	106.8	97.5	95.7	1.96	4.93	1.9	1.48276e+08	1.3038e+08	1.46049e+08	1.24407e+08	1.12392e+08	1.26947e+08	1.19191e+08	1.20754e+08	1.19863e+08	18	17	18
AAT78421.1	Galphai2 protein [OS=Homo sapiens]	0	80.057	46	11	49	8	366	41.5	5.99	141.86	11	Pf00025, Pf00503	2771	GNAI2	3		Human Thyroid Stimulating Hormone (TSH) signaling pathway; Corticotropin-releasing hormone signaling pathway; Signal Transduction of S1P Receptor; G Protein Signaling Pathways; Calcium Regulation in the Cardiac Cell			5	3	1.116	1.152	1.036	0.824687	0.890905	0.996631	24.88	23.24	20.44	112	96.5	91.4	5.56	5.12	5.33	50915790	4.82264e+07	4.72423e+07	4.12589e+07	3.34886e+07	3.90778e+07	3.5099e+07	3.74815e+07	3.77336e+07	9	9	9
XP_016885242.1	PREDICTED: spermine synthase isoform X1 [OS=Homo sapiens]	0	67.641	46	9	53	9	369	41.4	4.97	148.58	9	Pf01564	6611	SMS	X		Urea cycle and metabolism of amino groups			1	0	1.14	1.058	1.022	0.802135	0.983721	0.983244	32.11	24.54	40.34	105.8	98.3	95.9	12.67	12.57	10.07	2.15518e+07	2.32136e+07	2.03641e+07	1.88397e+07	1.55168e+07	2.08006e+07	1.79792e+07	1.64472e+07	1.98613e+07	9	8	8
NP_005262.1	glutamate dehydrogenase 1, mitochondrial isoform a precursor [OS=Homo sapiens]	0	138.754	46	19	103	19	558	61.4	7.8	214.18	19	Pf00208, Pf02812	2746	GLUD1	10	ENSG00000148672.8	Amino Acid metabolism; Urea cycle and metabolism of amino groups	Nitrogen metabolism; Carbon metabolism; D-Glutamine and D-glutamate metabolism; Alanine, aspartate and glutamate metabolism; Arginine biosynthesis; Metabolic pathways; Proximal tubule bicarbonate reclamation	Transcriptional activation of mitochondrial biogenesis; Amino acid synthesis and interconversion (transamination)	15	0	0.889	0.923	1.058	0.365911	0.712107	0.957112	22.46	23.09	16.89	95.6	99.4	104.9	9.64	18.16	3.61	1.26066e+08	9.14565e+07	1.05228e+08	1.4587e+08	9.43269e+07	1.00494e+08	1.18679e+08	1.09698e+08	1.0822e+08	15	16	16
AAF18437.1	CHORD containing protein-1 [OS=Homo sapiens]	0	146.054	45	11	77	11	332	37.4	7.71	255.77	11	Pf04968, Pf04969	26973	CHORDC1	11					0	0	1.158	1.139	1.128	0.654662	0.910767	0.802072	22.21	39.95	32.93	85.6	72.9	141.5	2.84	5.18	40.02	5.65802e+07	5.20039e+07	5.4044e+07	4.55976e+07	4.3563e+07	4.2051e+07	1.0542e+08	8.4913e+07	4.2778e+07	9	8	7
Q99873.2	RecName: Full=Protein arginine N-methyltransferase 1; AltName: Full=Histone-arginine N-methyltransferase PRMT1; AltName: Full=Interferon receptor 1-bound protein 4 [OS=Homo sapiens]	0	115.767	45	13	93	13	361	41.5	5.43	204.78	13	Pf05175, Pf06325, Pf08241, Pf12847, Pf13649, Pf13847	3276	PRMT1	19		Energy Metabolism; mRNA Processing; Tryptophan metabolism; Interferon type I signaling pathways	FoxO signaling pathway; Glucagon signaling pathway	TP53 Regulates Transcription of Genes Involved in G2 Cell Cycle Arrest; RUNX1 regulates genes involved in megakaryocyte differentiation and platelet function; RMTs methylate histone arginines	17	0	1.051	1.101	1.077	0.948849	0.967812	0.916228	24.96	28.78	24.56	105.1	98	97	11.88	14.62	1.66	1.31236e+08	9.48333e+07	1.01102e+08	1.12504e+08	7.3915e+07	8.8309e+07	89858081	9.04287e+07	9.01575e+07	12	13	12
ALQ33840.1	vasodilator-stimulated phosphoprotein isoform 2, partial [OS=Homo sapiens]	0	193.232	45	15	115	15	328	35.4	8.94	399.67	15	Pf00568	7408	VASP	19		Integrin-mediated Cell Adhesion; Focal Adhesion			2	0	1.01	0.913	0.903	0.966759	0.678643	0.646037	28.51	44.1	30.49	88.8	95.5	115.7	2.23	8.55	2.62	7.65167e+07	6.64639e+07	6.9717e+07	6.68718e+07	6.88842e+07	7.14102e+07	9.12719e+07	8.57315e+07	8.93213e+07	14	13	12
CAA36839.1	Calmodulin [OS=Homo sapiens]	0	103.598	45	7	166	7	152	17.2	4.21	332.03	7	Pf00036, Pf08726, Pf12763, Pf13202, Pf13405, Pf13499, Pf13833, Pf14658	808	CALM3	19		Myometrial Relaxation and Contraction Pathways; Glycogen Metabolism; Calcium Regulation in the Cardiac Cell			3	0	1.085	0.952	0.856	0.851493	0.79448	0.42954	28.72	31.42	32.99	93.7	105.5	100.9	10.52	11.36	6.81	4.18457e+08	4.19633e+08	4.90431e+08	4.19814e+08	4.5589e+08	4.71979e+08	5.01484e+08	4.66853e+08	4.2581e+08	7	7	7
NP_055037.1	NADH dehydrogenase [ubiquinone] 1 alpha subcomplex subunit 8 isoform 1 [OS=Homo sapiens]	0	46.724	45	5	33	5	172	20.1	7.65	76.55	5	Pf06747	4702	NDUFA8	9	ENSG00000119421.6	Electron Transport Chain; Oxidative phosphorylation	Alzheimer's disease; Non-alcoholic fatty liver disease (NAFLD); Huntington's disease; Metabolic pathways; Oxidative phosphorylation; Parkinson's disease	Complex I biogenesis	13	0	1.161	1.459	1.205	0.7537	0.234442	0.564669	29.29	36.8	28.27	117.2	93	89.8	8.99	15.8	8.19	2.44403e+07	1.78158e+07	2.16313e+07	2.16318e+07	1.49053e+07	1.51308e+07	1.39132e+07	1.5801e+07	1.56241e+07	5	5	5
EAW93951.1	chromosome 7 open reading frame 24, isoform CRA_b [OS=Homo sapiens]	0	41.296	45	6	26	6	190	21.3	5.14	55.14	6	Pf06094, Pf13772	79017	GGCT	7					0	0	0.853	0.878	1.043	0.347057	0.547459	0.98281	26.11	17.54	26.59	72.5	120.9	106.6	9.02	24.85	8.07	2.47626e+07	2.4717e+07	2.80583e+07	2.89366e+07	4.18707e+07	4.11548e+07	4.26301e+07	3.75299e+07	3.54933e+07	6	6	6
NP_061185.1	Protein RCC2 [OS=Homo sapiens]	0	131.6	45	16	96	16	522	56	8.78	209.55	16	Pf00415, Pf13540	55920	RCC2	1; CHR_HG2095_PATCH	ENSG00000281540.2; ENSG00000179051.13			Amplification of signal from unattached kinetochores via a MAD2 inhibitory signal; Separation of Sister Chromatids; Resolution of Sister Chromatid Cohesion; RHO GTPases Activate Formins	16	0	1.028	0.966	0.916	0.99773	0.817089	0.700026	21.3	24.92	20.82	105.6	90.6	103.8	8.45	12.11	2.93	1.1591e+08	1.0191e+08	9.50368e+07	1.09811e+08	8.20642e+07	8.07431e+07	1.02544e+08	1.02773e+08	1.05716e+08	15	15	15
NP_001188306.1	alpha-aminoadipic semialdehyde dehydrogenase isoform 2 [OS=Homo sapiens]	0	84.788	45	14	44	14	511	55.3	6.86	90.1	14	Pf00171	501	ALDH7A1	5					0	0	0.958	1.155	1.095	0.80006	0.88943	0.883272	30.39	42.67	23.98	116.2	93.1	90.6	15.52	19.84	6.45	6.28143e+07	6.32154e+07	8.12379e+07	5.45557e+07	4.32138e+07	6.62848e+07	4.68996e+07	5.09398e+07	5.15592e+07	13	13	13
NP_001032411.1	ubiquitin carboxyl-terminal hydrolase 14 isoform b [OS=Homo sapiens]	0	114.461	45	17	58	17	459	52.4	5.78	111	17	Pf00443, Pf13423	9097	USP14	18	ENSG00000101557.14				0	0	0.976	0.93	0.903	0.874964	0.733259	0.648116	35.36	30.17	23.91	85	96.2	118.7	6.81	9.16	10.04	5.0549e+07	4.04229e+07	4.2032e+07	5.52389e+07	4.3207e+07	4.28432e+07	6.26477e+07	5.83355e+07	5.00033e+07	11	10	11
AAH13918.1	Eukaryotic translation elongation factor 1 gamma [OS=Homo sapiens]	0	184.412	45	17	209	15	437	50.1	6.67	613.28	17	Pf00043, Pf00647, Pf02798, Pf13409, Pf13410, Pf13417, Pf14497	1937	EEF1G	11		Translation Factors			1	2	0.952	0.9	0.973	0.769251	0.632194	0.883272	25.19	23.13	22.17	92.8	103	104.2	1.9	5.07	4.52	5.11863e+08	4.3033e+08	4.79209e+08	5.42175e+08	4.30507e+08	4.88899e+08	5.45115e+08	4.87987e+08	5.07599e+08	16	15	15
EAW88064.1	ribosomal protein L7a, isoform CRA_d, partial [OS=Homo sapiens]	0	179.822	45	21	219	21	313	35	11.08	394.09	21	Pf01248	6130	RPL7A	9		Cytoplasmic Ribosomal Proteins			1	0	1.004	1.075	1.059	0.952688	0.995561	0.955973	18.34	22.53	17.93	97.5	101	101.5	4.89	2.95	4.69	8.21616e+08	7.1345e+08	7.14051e+08	7.60794e+08	6.97941e+08	7.46308e+08	8.38989e+08	7.53142e+08	7.61271e+08	18	18	20
NP_001015509.1	peptidyl-tRNA hydrolase 2, mitochondrial isoform a [OS=Homo sapiens]	0	44.499	45	5	36	5	180	19.3	8.73	106.7	5	Pf01981	51651	PTRH2	17	ENSG00000141378.14				0	0	0.8	1	1.352	0.160055	0.89225	0.152756	26.3	49.52	31.94	99.7	118.6	81.7	7.74	4.39	4.69	2.72185e+07	2.03565e+07	2.38603e+07	2.95516e+07	2.46531e+07	2.51171e+07	1.8752e+07	2.00041e+07	1.84285e+07	5	5	5
NP_002120.1	High mobility group protein B2 [OS=Homo sapiens]	0	208.419	45	15	200	10	209	24	7.81	395.68	15	Pf00505, Pf09011	3148	HMGB2	4	ENSG00000164104.11	Retinoblastoma (RB) in Cancer; Ectoderm Differentiation		Activation of DNA fragmentation factor	7	0	1.209	1.313	1.058	0.246399	0.536752	0.958075	16.7	19.83	25.52	119.8	94.9	85.3	4.7	8.27	14.13	2.98268e+08	2.61474e+08	2.61299e+08	2.45595e+08	1.94849e+08	1.93606e+08	1.95506e+08	2.04299e+08	1.53291e+08	9	10	9
NP_001900.1	cathepsin D preproprotein [OS=Homo sapiens]	0	109.504	45	12	95	12	412	44.5	6.54	215.26	12	Pf00026, Pf07966, Pf14541, Pf14543	1509	CTSD	11	ENSG00000117984.13	Prolactin Signaling Pathway	Sphingolipid signaling pathway; Lysosome; Apoptosis; Tuberculosis	Collagen degradation; Metabolism of Angiotensinogen to Angiotensins; Neutrophil degranulation; MHC class II antigen presentation	16	0	1.038	1.069	1.001	0.984659	0.996014	0.944891	36.05	32.75	35.95	97.6	99.9	102.5	18.92	14.08	7.47	1.5004e+08	9.45845e+07	1.05527e+08	1.27094e+08	8.4696e+07	9.92516e+07	1.12562e+08	9.51224e+07	1.04527e+08	11	11	12
BAF82705.1	unnamed protein product [OS=Homo sapiens]	0	422.681	45	48	303	48	1394	157.8	6.13	748.34	48	Pf12854, Pf13041, Pf13812	10128	LRPPRC	2					0	0	1.002	1.256	1.226	0.946493	0.683772	0.495856	23.84	35.7	30	105.5	108.4	86.1	9.13	6.84	12.54	3.6338e+08	2.65627e+08	3.0711e+08	3.268e+08	2.5019e+08	2.89766e+08	2.06307e+08	2.60215e+08	2.36282e+08	45	46	45
NP_001003701.1	ATP synthase-coupling factor 6, mitochondrial isoform b precursor [OS=Homo sapiens]	0	19.828	45	3	9	3	116	13.4	9.07	36.15	3	Pf05511	522	ATP5J	21	ENSG00000154723.12	Electron Transport Chain; Oxidative phosphorylation			2	0	0.886	1.091	1.228	0.791269	0.999203	0.617656	11.16	6.38	11.33	92.3	96.3	111.5	6.25	8.97	37.14	2.96232e+06	2.38229e+06	2.93363e+06	2.89494e+06	2.54872e+06	3.13111e+06	3.29394e+06	5.03525e+06	2.4319e+06	1	1	1
AAF29104.1	HSPC140 [OS=Homo sapiens]	0	66.144	45	10	59	1	346	38.4	5.12	122.98	10	Pf00899	10055	SAE1	19					0	0		0.01	0.01		1.62313e-16	1.7785e-16						300												838379
AAH09806.1	methylenetetrahydrofolate dehydrogenase (NADP+ dependent) 1, methenyltetrahydrofolate cyclohydrolase, formyltetrahydrofolate synthetase [OS=Homo sapiens]	0	236.441	45	32	170	1	935	101.5	7.18	403.78	32	Pf00763, Pf01268, Pf02882	4522	MTHFD1	14		Folate Metabolism; One Carbon Metabolism; Trans-sulfuration and one carbon metabolism			3	0	0.411	100	100	0.0642091	1.62313e-16	1.7785e-16	257.27			87.3	212.7		123.07	2.51		26490.4		362450	234464	198466					1		1
NP_150597.1	28S ribosomal protein S36, mitochondrial [OS=Homo sapiens]	0	31.831	45	3	22	3	103	11.5	9.99	36.23	3		92259	MRPS36	5; CHR_HSCHR5_2_CTG1_1	ENSG00000278461.4; ENSG00000134056.11			Mitochondrial translation initiation; Mitochondrial translation elongation; Mitochondrial translation termination	6	0	1.088	1.669	1.417	0.914839	0.0493735	0.0715482	22.22	17.63	16.7	124.5	102.3	73.2	8.93	12.04	8.94	2.38242e+07	2.04363e+07	1.91404e+07	2.20293e+07	1.57155e+07	1.67673e+07	1.40266e+07	1.2413e+07	1.14297e+07	1	2	2
NP_001289978.1	myosin regulatory light chain 12A isoform 2 [OS=Homo sapiens]	0	34.219	45	5	40	5	177	20.4	4.75	128.88	5	Pf00036, Pf13202, Pf13405, Pf13833	10627	MYL12A	18	ENSG00000101608.12				0	0	1.103	0.958	0.834	0.778428	0.801912	0.323452	26.32	16.88	14.89	96	95.1	108.8	4.74	4.61	1.09	8.66739e+07	7.89823e+07	9.04468e+07	8.18781e+07	7.38926e+07	8.30565e+07	9.43786e+07	9.19755e+07	9.3232e+07	5	5	5
AAD44488.1	p47 [OS=Homo sapiens]	0	95.118	45	12	70	1	370	40.5	5.14	151.97	12	Pf00789, Pf08059, Pf14555	55968	NSFL1C	20			Protein processing in endoplasmic reticulum		1	0	0.93	0.941	0.993	0.867352	0.787792	0.910009	5.05	5.24	3.61	96.5	100.9	102.5	5.57	6.49	1.7	2.95935e+06	2878546	2.90896e+06	2.99104e+06	2.64264e+06	3.1091e+06	2.96069e+06		2.95036e+06	1	1	1
NP_006796.1	Heterogeneous nuclear ribonucleoprotein A0 [OS=Homo sapiens]	0	104.332	45	8	65	8	305	30.8	9.29	177.55	8	Pf00076, Pf13893, Pf14259	10949	HNRNPA0	5	ENSG00000177733.6			mRNA Splicing - Major Pathway	4	0	0.948	1.037	1.036	0.750385	0.958519	0.996631	38.61	60.71	38.03	109	102.2	88.8	5.29	3.58	4.57	1.07918e+08	9.08334e+07	9.22443e+07	9.60656e+07	7.85434e+07	8.51316e+07	7.80563e+07	7.09274e+07	7.65942e+07	6	6	6
XP_005262724.1	PREDICTED: UDP-glucose 6-dehydrogenase isoform X1 [OS=Homo sapiens]	0	109.573	45	14	72	14	507	56.4	6.92	164.46	14	Pf00984, Pf03720, Pf03721	7358	UGDH	4					0	0	0.959	0.977	0.982	0.840343	0.844928	0.899353	48.23	44.76	29.02	91.3	104.5	104.2	8.04	15.7	13.82	5.20887e+07	3.8728e+07	4.54465e+07	4.07561e+07	4.89363e+07	4.77671e+07	6.29068e+07	4.85901e+07	4.89259e+07	14	12	12
XP_016882602.1	PREDICTED: 40S ribosomal protein S19 isoform X1 [OS=Homo sapiens]	0	72.019	45	11	82	11	193	21	10.3	112.3	11	Pf01090	6223	RPS19	19		Cytoplasmic Ribosomal Proteins			1	0	1.001	1.115	1.121	0.943144	0.949683	0.823516	28.35	34.17	18.55	117.9	97.1	85	7.01	10.23	2.88	2.62501e+08	2.30595e+08	2.20866e+08	2.34055e+08	1.69037e+08	1.88475e+08	1.74192e+08	1.62432e+08	1.69628e+08	11	10	10
BAH13430.1	unnamed protein product [OS=Homo sapiens]	0	88.666	45	10	73	10	238	26.7	5.08	176.7	10	Pf00036, Pf13405, Pf13499	4637	MYL6	12	ENSG00000092841.18	Focal Adhesion			1	0	0.997	1.012	1.022	0.927139	0.91118	0.983748	33.06	30.1	28.54	99.6	103.3	97.1	10.03	9.55	8.1	2.68688e+08	2.77984e+08	3.07674e+08	2.62362e+08	2.73364e+08	2.88057e+08	2.53042e+08	2.79965e+08	2.8825e+08	10	11	10
EAW64946.1	hCG2002013, isoform CRA_a [OS=Homo sapiens]	0	306.836	45	23	225	22	584	63.5	8.41	610.54	23	Pf00478, Pf00571, Pf00977, Pf01070, Pf03060	3615	IMPDH2	3					0	1	1.033	1.152	1.061	0.993345	0.890905	0.949511	23.83	32.52	24.09	100.7	105.5	93.9	7.9	3.55	6.5	4.20375e+08	3.22447e+08	3.47582e+08	3.63781e+08	3.03292e+08	3.43716e+08	3.49342e+08	3.03397e+08	3.08369e+08	23	23	23
AAA35564.1	alternative [OS=Homo sapiens]	0	89.291	45	14	117	13	292	32	5.91	251.78	14	Pf00076, Pf13893, Pf14259	6426	SRSF1	17		mRNA Processing			1	1	1.073	1.011	0.956	0.881607	0.91118	0.83934	25.1	27.56	33.89	104.8	94.9	100.2	5.54	4.84	1.57	1.45199e+08	1.22557e+08	1.23586e+08	1.27691e+08	1.04841e+08	1.07883e+08	1.26194e+08	1.19968e+08	1.20148e+08	14	14	13
NP_002622.2	6-phosphogluconate dehydrogenase, decarboxylating isoform 1 [OS=Homo sapiens]	0	113.325	45	17	115	17	483	53.1	7.23	254.36	17	Pf00393, Pf03446	5226	PGD	1	ENSG00000142657.20	Pentose Phosphate Pathway; NRF2 pathway	Pentose phosphate pathway; Carbon metabolism; Metabolic pathways; Glutathione metabolism	Pentose phosphate pathway (hexose monophosphate shunt)	9	0	0.88	1.028	1.139	0.307474	0.944762	0.769893	25.4	29.85	22.05	88.9	112.1	99	3.36	4.38	4.51	1.37958e+08	1.24766e+08	1.40104e+08	1.64372e+08	1.57117e+08	1.57285e+08	1.37917e+08	1.47725e+08	1.42596e+08	16	15	16
NP_003008.1	Serine/arginine-rich splicing factor 3 [OS=Homo sapiens]	0	88.51	45	7	93	7	164	19.3	11.65	272.55	7	Pf00076, Pf13893, Pf14259	6428	SRSF3	6	ENSG00000112081.16	mRNA Processing	Spliceosome; Herpes simplex infection	Cleavage of Growing Transcript in the Termination Region ; Transport of Mature mRNA derived from an Intron-Containing Transcript; mRNA 3'-end processing; mRNA Splicing - Major Pathway	14	0	1.016	1.048	1.08	0.986795	0.970661	0.911442	33.85	34.91	35.14	105.4	101.9	92.8	3.34	4.64	4.1	2.10915e+08	1.73439e+08	1.89646e+08	1.81614e+08	1.66991e+08	1.6094e+08	1.61863e+08	1.68848e+08	1.55319e+08	7	7	7
NP_808210.2	small nuclear ribonucleoprotein Sm D2 isoform 2 [OS=Homo sapiens]	0	50.755	44	6	49	6	108	12.4	9.89	99.41	6	Pf01423	6633	SNRPD2	19	ENSG00000125743.10	mRNA Processing			1	0	0.983	1.2	1.144	0.881607	0.801912	0.751759	43.97	37.42	21.98	120.2	96.8	83	3.94	4.55	7.07	1.13337e+08	9.85645e+07	1.00253e+08	9.16106e+07	7.50198e+07	7.80609e+07	7.46595e+07	7.03369e+07	6.3189e+07	6	6	6
AAH07909.1	FASN protein [OS=Homo sapiens]	0	136.496	44	14	93	1	439	48.3	5.58	236.27	14	Pf00975	2194	FASN	17		SREBF and miR33 in cholesterol and lipid homeostasis; Liver X Receptor Pathway; Fatty Acid Biosynthesis			3	0	1.034	100	100	0.995328	1.62313e-16	1.7785e-16	40.47			152.5	147.5		50.78	46.72			2.00631e+06	1.02901e+06		1.77458e+06	944648					1	1
NP_066272.1	PDZ and LIM domain protein 1 [OS=Homo sapiens]	0	65.807	44	9	41	9	329	36	7.02	90.83	9	Pf00412, Pf00595, Pf13180	9124	PDLIM1	10	ENSG00000107438.8				0	0	1.028	1.049	1.016	0.993164	0.970674	0.975582	22.69	27.13	26.4	118.2	95.7	86.1	13.58	9.9	10.25	2.70423e+07	3.10464e+07	3.05178e+07	2.55898e+07	2.14648e+07	1.95536e+07	1.85671e+07	2.22748e+07	2.09846e+07	8	9	8
AAP97139.1	p47 [OS=Homo sapiens]	0	102.416	44	12	70	1	372	40.9	5.1	152.29	12	Pf00789, Pf08059, Pf14555	55968	NSFL1C	20					0	10	1.157	1.138	1.05	0.629191	0.91118	0.974446	18.82	38.12	32	116.4	101	82.6	2.42	8.33	4.63	7.11203e+07	6.19448e+07	6.46642e+07	5.78633e+07	5.59734e+07	5.02125e+07	5.00093e+07	4.53916e+07	4.48531e+07	9	9	8
EAW58717.1	hCG27283 [OS=Homo sapiens]	0	49.254	44	4	40	4	115	13	10.7	77.69	4	Pf01283								0	0	1.038	0.951	0.897	0.99773	0.793715	0.618817	48.08	32.95	54.1	96.2	101.8	102	9.46	15.43	13.96	7.35765e+07	5.64652e+07	5.83027e+07	6.85055e+07	5.64564e+07	4.68416e+07	7.45675e+07	5.55623e+07	6.14627e+07	3	3	3
BAD97328.1	tyrosyl-tRNA synthetase variant, partial [OS=Homo sapiens]	0	124.385	44	20	82	20	528	59.1	7.21	190.93	20	Pf00579, Pf01588	8565	YARS	1					0	0	0.782	0.83	0.945	0.0207079	0.371831	0.800436	33.33	38.46	27.2	80.4	107.5	112.1	6.45	10.08	2.82	6.98579e+07	5.63265e+07	5.84346e+07	8.76284e+07	6.27789e+07	7.52249e+07	8.5706e+07	8.11099e+07	7.88692e+07	18	18	17
XP_005259725.1	PREDICTED: far upstream element-binding protein 2 isoform X1 [OS=Homo sapiens]	0	226.415	44	23	166	22	747	76.6	7.33	372.69	23	Pf00013, Pf07650, Pf09005, Pf13014	8570	KHSRP	19					0	1	1.105	1.302	1.187	0.769519	0.567694	0.624608	20.5	33.19	25.3	115.1	99.5	85.3	4.07	3.83	2.55	2.43665e+08	2.13964e+08	2.16099e+08	1.98075e+08	1.85532e+08	1.83764e+08	1.66913e+08	1.56202e+08	1.61793e+08	22	21	21
P11586.3	RecName: Full=C-1-tetrahydrofolate synthase, cytoplasmic; Short=C1-THF synthase; Includes: RecName: Full=Methylenetetrahydrofolate dehydrogenase; Includes: RecName: Full=Methenyltetrahydrofolate cyclohydrolase; Includes: RecName: Full=Formyltetrahydrofolate synthetase; Contains: RecName: Full=C-1-tetrahydrofolate synthase, cytoplasmic, N-terminally processed [OS=Homo sapiens]	0	240.789	44	32	177	1	935	101.5	7.3	460.85	32	Pf00763, Pf01268, Pf02882	4522	MTHFD1	14		Folate Metabolism; One Carbon Metabolism; Trans-sulfuration and one carbon metabolism	One carbon pool by folate; Metabolic pathways	Metabolism of folate and pterines	9	31	0.979	1.007	1.071	0.870876	0.905161	0.931669	26.74	28.81	20.81	98.8	105.5	95.7	2.31	1.72	2.83	2.79357e+08	2.55367e+08	2.72871e+08	2.89894e+08	2.5292e+08	2.60361e+08	2.63228e+08	2.43776e+08	2.49116e+08	29	30	29
BAA11226.1	26S proteasome subunit p97 [OS=Homo sapiens]	0	290.22	44	33	194	33	908	100.1	5.2	426.84	33	Pf01851	5708	PSMD2	3		Proteasome Degradation; TNF alpha Signaling Pathway; Parkin-Ubiquitin Proteasomal System pathway			3	0	1.133	1.239	1.067	0.63985	0.723166	0.938691	26.12	30.31	26.48	117.6	101.2	81.2	7.37	3.45	6.68	3.40745e+08	3.34579e+08	3.72241e+08	3.02108e+08	2.71936e+08	2.99943e+08	2.31641e+08	2.38812e+08	2.57018e+08	31	31	29
NP_004528.1	nucleosome assembly protein 1-like 1 isoform 1 [OS=Homo sapiens]	0	227.882	44	14	149	12	391	45.3	4.46	456.23	14	Pf00956	4673	NAP1L1	12	ENSG00000187109.13				0	2	1.008	1.151	1.209	0.966759	0.890905	0.550913	18.62	24.03	21.34	103	105	92	6.95	7.32	8.39	1.75546e+08	1.34709e+08	1.50215e+08	1.37375e+08	1.32937e+08	1.47338e+08	1.12385e+08	1.28313e+08	1.26453e+08	12	11	12
EAW77774.1	ribosomal protein L4, isoform CRA_b [OS=Homo sapiens]	0	256.139	44	23	218	3	477	52.9	10.96	542.91	23	Pf00573, Pf14374	6124	RPL4	15		Cytoplasmic Ribosomal Proteins			1	21	0.997	0.948	1.002	0.928032	0.781832	0.94838	26.79	33.56	27.22	96.3	95.3	108.4	14.05	9.08	0.57	5.11637e+08	3.61412e+08	3.76792e+08	4.44978e+08	3.32274e+08	3.56966e+08	4.31083e+08	4.17694e+08	4.17125e+08	24	21	21
CAG33032.1	SNRPF [OS=Homo sapiens]	0	26.512	44	3	26	1	86	9.7	4.67	76.38	3	Pf01423	6636	SNRPF	12		mRNA Processing			1	0	1.772	2.357	1.33	2.59259e-05	2.88383e-05	0.195217	41.23	8.85	35.94	159	72.1	68.9	29.73	24.04	32.6	4.16219e+07	2.10786e+07	4.19162e+07	17746674	1.2812e+07	2.17266e+07	8.89915e+06	1.6899e+07	1.61652e+07	1	1	1
BAG51833.1	unnamed protein product [OS=Homo sapiens]	0	111.034	44	12	52	2	356	38.7	8.41	184.17	12	Pf00441, Pf08028	37	ACADVL	17		Fatty Acid Beta Oxidation; Mitochondrial LC-Fatty Acid Beta-Oxidation			2	0	0.01	0.01	1.023	2.97569e-16	1.62313e-16	0.936501			28.13		151.7	148.3		26.36						355670	257932			312573
NP_001269163.1	proteasome subunit alpha type-6 isoform c [OS=Homo sapiens]	0	77.614	44	9	71	9	227	25.3	7.11	159.92	9	Pf00227	5687	PSMA6	14	ENSG00000100902.10	Proteasome Degradation			1	0	1.082	1.025	0.907	0.869879	0.940341	0.664263	19.46	20.73	21.99	101.7	97.3	101	5.72	7.57	3.78	9.20623e+07	7.5123e+07	7.80575e+07	7.97332e+07	6.04389e+07	7.18272e+07	7.67961e+07	7.71683e+07	8.04428e+07	9	9	9
NP_788955.1	proteasome activator complex subunit 1 isoform 2 [OS=Homo sapiens]	0	61.033	44	11	57	11	250	28.6	6.71	77.11	11	Pf02251, Pf02252	5720	PSME1	14	ENSG00000092010.14	Proteasome Degradation			1	0	1.065	1.311	1.15	0.91973	0.541951	0.730408	27.85	44.3	49.6	112.8	94.6	92.6	3	11.4	17.07	7.71126e+07	6.75656e+07	7.72227e+07	7.30428e+07	5.23374e+07	5.65883e+07	6.9777e+07	5.73335e+07	4.82371e+07	10	10	10
AAH11885.1	Eukaryotic translation initiation factor 2A, 65kDa [OS=Homo sapiens]	0	134.325	44	15	107	15	585	64.9	8.97	237.87	15	Pf08662	83939	EIF2A	3		Photodynamic therapy-induced unfolded protein response; VEGFA-VEGFR2 Signaling Pathway			2	0	1.098	1.074	0.925	0.805782	0.996917	0.725824	23.38	28.84	30.25	107.6	95.3	97.1	3.78	1.92	6.44	9.85768e+07	8.32811e+07	8.67844e+07	8.1324e+07	6.86701e+07	73676358	7.92411e+07	6.94089e+07	7.73e+07	15	15	15
NP_036220.1	6-phosphogluconolactonase [OS=Homo sapiens]	0	35.907	44	7	27	7	258	27.5	6.05	48.55	7	Pf01182	25796	PGLS	19	ENSG00000130313.6	Pentose Phosphate Pathway	Carbon metabolism; Metabolic pathways; Pentose phosphate pathway	Pentose phosphate pathway (hexose monophosphate shunt)	7	0	1.06	0.857	0.948	0.968349	0.466085	0.812165	24.76	37.52	30.28	94.2	98.3	107.4	13.86	4.16	2.16	2.73556e+07	1.97015e+07	2.00101e+07	2.34626e+07	1.94209e+07	2.00925e+07	2.36859e+07	2.25788e+07	2.33889e+07	7	6	5
EAW98517.1	RAN, member RAS oncogene family, isoform CRA_c [OS=Homo sapiens]	0	185.547	44	14	134	14	233	26.2	7.01	359.4	14	Pf00025, Pf00071, Pf08477	5901	RAN	12	ENSG00000132341.11	Androgen receptor signaling pathway; miRNA Biogenesis			2	0	1.134	0.928	0.872	0.631982	0.72985	0.509799	37.85	38.28	35.28	99	97.5	103.5	11.29	9.71	3.72	6.5302e+08	4.69937e+08	5.14446e+08	5.76408e+08	439855031	4.45555e+08	5.35894e+08	5.1065e+08	4.84107e+08	14	13	13
BAG37895.1	unnamed protein product [OS=Homo sapiens]	0	93.291	44	8	62	7	240	26.8	4.67	130.4	8	Pf00855	3068	HDGF	1					0	1	1.028	0.94	0.854	0.99773	0.761687	0.4188	22.08	30.54	21.46	90.7	97.5	111.8	22.55	2.01	8.07	1.3508e+08	8.27406e+07	8.71611e+07	9.69224e+07	8.17361e+07	8.88448e+07	1.1412e+08	1.05333e+08	9.44765e+07	8	8	8
AAD43442.1	26S proteasome subunit P40.5 [OS=Homo sapiens]	0	91.579	44	13	47	13	376	42.9	5.81	96.05	13	Pf01399	5719	PSMD13	11		Proteasome Degradation; Parkin-Ubiquitin Proteasomal System pathway			2	0	1.022	1.057	1.01	0.985274	0.982744	0.962089	28	29.17	20.39	104	101.3	94.7	2.24	4.19	4.13	6.21398e+07	5.58011e+07	61671828	5.68801e+07	5.41489e+07	5.42855e+07	5.29078e+07	5.59488e+07	5.20899e+07	11	11	11
NP_001124182.1	U6 snRNA-associated Sm-like protein LSm5 isoform b [OS=Homo sapiens]	0	6.049	44	2	2	2	62	6.8	4.28	6.08	2	Pf01423	23658	LSM5	7	ENSG00000106355.9				0	0	1.286	1.254	0.975	0.881607	0.941066	0.883272	12.05	12.05	0	116.5	90.6	92.9	29.82			97623.8	145247	170800		106651				118819	1	1	1
EAW48944.1	hCG1640785, isoform CRA_a [OS=Homo sapiens]	0	37.272	44	7	55	7	124	13.6	9.99	60.7	7	Pf03297	401206	RPS25P6	5					0	0	1.091	1.183	1.072	0.83252	0.830899	0.93056	22.54	26.32	14.17	104.7	102.4	92.9	6.58	2.45	1.91	2.73263e+08	2.63575e+08	2.53848e+08	2.51328e+08	2.12055e+08	2.34767e+08	2.28158e+08	2.153e+08	2.17014e+08	7	7	7
XP_016884379.1	PREDICTED: ran-specific GTPase-activating protein isoform X1 [OS=Homo sapiens]	0	102.488	44	9	65	9	271	30.9	6.68	184.73	9	Pf00638	5902	RANBP1	22					0	0	1.082	0.932	0.88	0.856584	0.740977	0.546482	42.33	33.36	25.55	76.1	115.8	108.1	10.01	24.36	7.58	1.41704e+08	1.16751e+08	1.53843e+08	1.30172e+08	1.77935e+08	1.94463e+08	2.1055e+08	1.81636e+08	1.79911e+08	8	8	9
BAG61164.1	unnamed protein product [OS=Homo sapiens]	0	98.209	43	10	451	3	166	18	10.32	477.56	10	Pf00125, Pf00808	440689	HIST2H2BF	1					0	6	1.019	0.956	1.015	0.993345	0.80166	0.97383	35.16	41.94	43.92	95.5	103.5	101	11.56	11.7	6.8	9.81813e+08	1.07865e+09	1.03312e+09	1.08907e+09	1.17282e+09	1.02853e+09	9.83834e+08	1.03848e+09	1.09698e+09	9	8	8
AAV38495.1	Proteasome (Prosome, macropain) 26S subunit, non-ATPase, 10 [OS=Homo sapiens]	0	42.855	43	5	19	5	226	24.4	6.1	38.39	5	Pf00023, Pf12796, Pf13606, Pf13637, Pf13857	5716	PSMD10	X		Proteasome Degradation; Parkin-Ubiquitin Proteasomal System pathway			2	0	1.092	1.096	0.989	0.922201	0.970674	0.916228	31.89	27.46	24.87	106.1	98.3	95.6	24.81	1.3	11.73	1.76109e+07	9.95883e+06	11486055	10553593	9.04202e+06	9771657	9.62888e+06	9.82642e+06	1.16148e+07	5	4	5
AAH08435.1	Peroxiredoxin 3 [OS=Homo sapiens]	0	81.75	43	9	64	9	256	27.7	7.5	135.26	9	Pf00578, Pf08534, Pf10417, Pf13905	10935	PRDX3	10		Selenium Micronutrient Network			1	0	1.019	1.105	1.075	0.993345	0.965954	0.924192	22.67	35.09	26.31	105.1	98.7	96.1	6.94	12.99	9.5	1.04055e+08	8.00612e+07	8.87075e+07	1.00135e+08	6.92962e+07	7.65016e+07	6.78069e+07	7.98537e+07	7.64992e+07	9	9	9
EAW97549.1	small nuclear ribonucleoprotein polypeptide F, isoform CRA_b [OS=Homo sapiens]	0	12.741	43	3	14	1	67	7.7	4.41	32.34	3	Pf01423	6636	SNRPF	12		mRNA Processing			1	2	1.065	1.024	0.961	0.952688	0.939474	0.856352	15.35	13.87	13.56	102.6	96.6	100.8	49.66	8.31	1.49	15051027	4.00948e+07	42519597	4.29397e+07	34765048	3.3714e+07	4.04989e+07	4.04585e+07	3.90026e+07	2	3	3
NP_005057.1	splicing factor, proline- and glutamine-rich [OS=Homo sapiens]	0	328.428	43	28	227	27	707	76.1	9.44	520.97	28	Pf00076, Pf08075, Pf13893, Pf14259	6421	SFPQ	1	ENSG00000116560.10	mRNA Processing		PTK6 Regulates Proteins Involved in RNA Processing	5	0	1.023	1.079	1.129	0.99773	0.988613	0.799982	36.34	46.17	42.42	95.4	110.2	94.5	5.33	10.22	10.97	3.66032e+08	3.46067e+08	3.85233e+08	3.622e+08	3.84645e+08	3.99198e+08	3.61295e+08	2.91451e+08	3.53018e+08	24	26	25
NP_004388.2	Probable ATP-dependent RNA helicase DDX6 [OS=Homo sapiens]	0	115.102	43	13	68	13	483	54.4	8.66	130.58	13	Pf00270, Pf00271, Pf14617	1656	DDX6	11	ENSG00000110367.11		RNA degradation	mRNA decay by 5' to 3' exoribonuclease	4	0	1.054	0.965	0.927	0.968035	0.81608	0.73447	27.63	41.15	30.08	100.4	100.7	99	10.47	11.99	9.72	6.50148e+07	4.6828e+07	5.27817e+07	5.24356e+07	3.99503e+07	5.37947e+07	4.2639e+07	4.99421e+07	4.91016e+07	12	11	12
CAG33013.1	PTK9L [OS=Homo sapiens]	0	118.847	43	10	58	10	349	39.6	6.84	215.55	10	Pf00241	11344	TWF2	3					0	0	1.103	1.061	0.938	0.863892	0.987648	0.77959	25.86	40.47	31.36	102.8	100.2	96.9	7.49	11.18	1.29	4.22158e+07	4.10944e+07	4.64184e+07	3.56661e+07	3.78515e+07	4.07744e+07	4.0412e+07	4.06358e+07	3.975e+07	9	10	10
AAH00338.1	Psmd7 protein, partial [OS=Homo sapiens]	0	116.819	43	11	76	11	326	37.3	8.72	210.19	11	Pf01398, Pf13012	5713	PSMD7	16		Proteasome Degradation; Parkin-Ubiquitin Proteasomal System pathway			2	0	1.052	1.033	1.017	0.964248	0.953381	0.977212	29.74	26.15	21.94	104.6	100.3	95	8.76	2.51	5.24	8.13629e+07	5.96196e+07	7.06241e+07	6.4394e+07	5.91575e+07	6.21997e+07	5.98516e+07	6.09479e+07	6.45429e+07	11	10	10
NP_004334.1	Calreticulin precursor [OS=Homo sapiens]	0	165.317	43	14	165	14	417	48.1	4.44	440.28	14	Pf00262	811	CALR	19	ENSG00000179218.13	Androgen receptor signaling pathway; Photodynamic therapy-induced unfolded protein response; Calcium Regulation in the Cardiac Cell	Antigen processing and presentation; Protein processing in endoplasmic reticulum; Phagosome; Chagas disease (American trypanosomiasis); HTLV-I infection	Scavenging by Class F Receptors; Assembly of Viral Components at the Budding Site; ATF6 (ATF6-alpha) activates chaperone genes; Antigen Presentation: Folding, assembly and peptide loading of class I MHC; ER-Phagosome pathway; Calnexin/calreticulin cycle; Scavenging by Class A Receptors	32	0	1.279	1.156	0.964	0.0570967	0.885136	0.865051	27.42	40.51	43.77	114.6	87.9	97.5	6.31	14.27	4.14	3.46283e+08	2.78985e+08	2.90659e+08	2.84134e+08	1.91851e+08	2.13718e+08	245927213	2.45282e+08	2.58715e+08	14	14	14
CAG33214.1	PSMA3 [OS=Homo sapiens]	0	77.582	43	10	70	10	255	28.4	5.33	128.94	10	Pf00227, Pf10584	5684	PSMA3	14		Proteasome Degradation			1	0	1.125	1.169	1.025	0.669838	0.857829	0.990082	19.37	20.53	16.71	105.6	98.1	96.3	2.64	2.84	2.52	1.20777e+08	1.09728e+08	1.13582e+08	1.09201e+08	9.05403e+07	9.78802e+07	1.01412e+08	9.60273e+07	1.00149e+08	9	9	9
EAW53296.1	S100 calcium binding protein A13, isoform CRA_a, partial [OS=Homo sapiens]	0	15.526	43	3	8	3	51	5.8	4.72	17.93	3	Pf01023	6284	S100A13	1					0	0	1.646	1.611	0.878	0.0924748	0.100566	0.550913	48.88	74.54	124.12	125.2	82.4	92.4	9.49	15.85	11.77	5.49899e+06	4.02862e+06	5.15502e+06	3.35871e+06	2.23968e+06	3204250	3.6874e+06	4.17897e+06	3.297e+06	2	3	3
CAA77753.1	40 kDa protein kinase [OS=Homo sapiens]	0	68.644	43	9	39	7	348	40.4	7.15	123.54	9	Pf00069, Pf01636, Pf07714	5594	MAPK1	22		IL-5 Signaling Pathway; Osteopontin Signaling; Regulation of toll-like receptor signaling pathway; Physiological and Pathological Hypertrophy of the Heart; MicroRNAs in cardiomyocyte hypertrophy; Heart Development; Integrin-mediated Cell Adhesion; IL-1 signaling pathway; Integrated Breast Cancer Pathway; RANKL/RANK (Receptor activator of NFKB (ligand)) Signaling Pathway; Human Thyroid Stimulating…			56	2	1.051	1.187	1.083	0.986369	0.823082	0.904658	24.29	24.8	21.03	108.1	104.1	87.9	6.68	8.19	3.36	2.62597e+07	2.46037e+07	2.8504e+07	2.62907e+07	1.96969e+07	2.36667e+07	2.10486e+07	2.18747e+07	2.05168e+07	8	8	7
AAH37545.1	Poly (ADP-ribose) polymerase 1 [OS=Homo sapiens]	0	307.855	43	34	235	34	1014	113	8.88	424.82	34	Pf00533, Pf00644, Pf00645, Pf02877, Pf05406, Pf08063	142	PARP1	1		Corticotropin-releasing hormone signaling pathway; Fas Ligand (FasL) pathway and Stress induction of Heat Shock Proteins (HSP) regulation			2	0	1.041	1.05	1.002	0.974276	0.971923	0.94838	25.21	29.56	27.81	100.9	97.8	101.3	7.13	4	4.1	2.71299e+08	2.07444e+08	2.31705e+08	2.30106e+08	1.86317e+08	2.06297e+08	2.3193e+08	2.21173e+08	2.0805e+08	31	32	31
XP_016859678.1	PREDICTED: septin-2 isoform X1 [OS=Homo sapiens]	0	122.748	43	13	75	13	441	50.8	7.46	222.65	13	Pf00071, Pf00735, Pf01926, Pf13900	4735	SEPT2	2					0	0	1.099	1.192	1.087	0.818333	0.813619	0.897247	26.19	31.12	25.33	96.5	107	96.5	2.52	5.84	5.89	7.97931e+07	7.15079e+07	7.96773e+07	7.96316e+07	7.48723e+07	8.3001e+07	7.06488e+07	7.39278e+07	7.73337e+07	10	11	10
AAH68199.1	SLC25A5 protein, partial [OS=Homo sapiens]	0	172.991	43	20	183	8	323	35.3	9.82	352.58	20	Pf00153	292	SLC25A5	X		Electron Transport Chain	Parkinson's disease; Calcium signaling pathway; cGMP-PKG signaling pathway; Huntington's disease; HTLV-I infection		6	12	1.02	1.133	1.143	0.995115	0.917181	0.756472	38.16	23.89	34.61	100.3	93.9	105.9	18.95	13.24	11.91	7.36731e+08	4.83983e+08	4.98488e+08	5.90467e+08	4.05075e+08	4.52615e+08	4.8501e+08	6.02285e+08	5.24389e+08	18	18	17
BAD96916.1	proteasome 26S non-ATPase subunit 11 variant, partial [OS=Homo sapiens]	0	144.914	43	16	114	16	423	47.5	6.48	213.03	16	Pf01399	5717	PSMD11	17		Proteasome Degradation; Parkin-Ubiquitin Proteasomal System pathway			2	0	1.107	1.193	1.068	0.764005	0.81183	0.937525	22.05	22.67	21.81	121.2	96.9	81.8	10.39	6.67	4.86	3.54844e+08	2.81398e+08	2.73418e+08	2.65935e+08	2.12546e+08	217166979	2.00312e+08	1.87673e+08	2.05264e+08	16	16	15
AAC33433.1	histone macroH2A1.2 [OS=Homo sapiens]	0	181.506	43	14	157	12	372	39.6	9.79	469.72	14	Pf00125, Pf01661	9555	H2AFY	5					0	2	0.991	1.083	1.072	0.909994	0.98596	0.93111	22.65	22.59	21.88	108.1	101.3	90.5	6.27	6.86	8.55	2.53753e+08	2.12864e+08	2.12805e+08	2.23614e+08	1.71301e+08	1.99312e+08	1.76975e+08	1.8417e+08	2.0349e+08	14	13	14
AAA36399.1	Phosphatase 2a regulatory subunit [OS=Homo sapiens]	0	188.059	43	21	103	17	589	65.2	5.08	266.44	21	Pf02985, Pf13513, Pf13646	5518	PPP2R1A	19		Wnt Signaling Pathway and Pluripotency; Glycogen Metabolism			2	4	1.146	1.202	1.05	0.578103	0.80166	0.97383	25.91	28.03	21.24	117.3	95.8	86.8	3.24	2.94	5.45	2.45323e+08	2.00821e+08	2.24466e+08	1.88977e+08	1.56581e+08	1.68398e+08	1.7584e+08	1.56356e+08	1.56657e+08	19	20	20
AAV38639.1	ATP synthase, H+ transporting, mitochondrial F1 complex, O subunit (oligomycin sensitivity conferring protein) [OS=Homo sapiens]	0	45.67	43	7	29	7	213	23.3	9.99	53.81	7	Pf00213	539	ATP5O	21		Electron Transport Chain; Oxidative phosphorylation			2	0	1.003	1.261	1.255	0.952006	0.674484	0.393301	31.47	22.61	20.75	106.9	108.2	85	5.44	5.79	4.79	5.34359e+07	4.24747e+07	4.62828e+07	5.03004e+07	4.06824e+07	4.1764e+07	38481053	3.4958e+07	3.43175e+07	6	6	6
AAA36633.1	spermidine synthase [OS=Homo sapiens]	0	47.981	43	8	30	1	302	33.8	5.38	58.58	8	Pf01564, Pf13659, Pf13847	6723	SRM	1		Nucleotide Metabolism; Urea cycle and metabolism of amino groups			2	0	2.932	1.169	0.675	0.00539879	0.974789	0.153668	230.82	109.9	85.06	162.5	55.4	82.1	122.71	16.09	128.52		4.20165e+06	323769	366490	403977		595673	3.95427e+06	245438		1	1
NP_003744.1	Eukaryotic translation initiation factor 3 subunit D [OS=Homo sapiens]	0	135.121	43	16	103	16	548	63.9	6.05	266.07	16	Pf05091	8664	EIF3D	22	ENSG00000100353.17	Translation Factors	RNA transport	Formation of the ternary complex, and subsequently, the 43S complex; L13a-mediated translational silencing of Ceruloplasmin expression; Translation initiation complex formation; GTP hydrolysis and joining of the 60S ribosomal subunit; Formation of a pool of free 40S subunits; Ribosomal scanning and start codon recognition	13	0	0.975	0.981	0.995	0.859975	0.852301	0.931669	19.84	25.64	19.58	99.5	99.5	101	4.7	0.32	5.42	6.61955e+07	6.05681e+07	5.99599e+07	6.20406e+07	5.45901e+07	5.79147e+07	6.65914e+07	5.87852e+07	6.02019e+07	15	15	15
NP_006383.2	Nucleolar protein 56 [OS=Homo sapiens]	0	202.151	43	18	133	18	594	66	9.19	303.43	18	Pf01798, Pf08060, Pf08156	10528	NOP56	20	ENSG00000101361.16		Ribosome biogenesis in eukaryotes	Major pathway of rRNA processing in the nucleolus and cytosol; Association of TriC/CCT with target proteins during biosynthesis; rRNA modification in the nucleus and cytosol	10	0	0.952	0.962	0.979	0.769251	0.806559	0.894049	22.28	31.97	25.54	97.5	107.5	95.1	9.18	8.55	16.08	1.61198e+08	1.21155e+08	1.30409e+08	1.57789e+08	1.26225e+08	1.23429e+08	161680365	1.22107e+08	1.19533e+08	17	15	16
XP_016873329.1	PREDICTED: platelet-activating factor acetylhydrolase IB subunit beta isoform X1 [OS=Homo sapiens]	0	68.429	43	5	52	3	242	27.1	6.28	164.78	5	Pf00657, Pf13472	5049	PAFAH1B2	11					0	2	1.311	1.716	1.599	0.225507	0.0335005	0.00506053	30.81	65.09	68.14	128.3	94.1	77.6	8.09	10.51	24.25	2.60029e+07	1.96763e+07	2.47281e+07	2.11218e+07	1.53434e+07	1.66259e+07	9.56374e+06	1.41766e+07	1.51614e+07	5	5	5
NP_006641.1	complexin-2 [OS=Homo sapiens]	0	22.98	43	4	19	4	134	15.4	5.08	19.29	4	Pf05835	10814	CPLX2	5	ENSG00000145920.14	Synaptic Vesicle Pathway	Synaptic vesicle cycle		2	0	1.047	0.803	0.734	0.992434	0.280438	0.0443541	40.4	39.81	24.41	100.6	81.4	118	19.7	23.38	16.15	1.78787e+07	2.18035e+07	2.5013e+07	1.6828e+07	1.66724e+07	2.41681e+07	2.03468e+07	2.71082e+07	2.62353e+07	3	3	3
NP_001008709.1	serine/threonine-protein phosphatase PP1-alpha catalytic subunit isoform 3 [OS=Homo sapiens]	0	132.953	43	13	103	4	341	38.6	6.62	256.37	13	Pf00149	5499	PPP1CA	11	ENSG00000172531.14	Nicotine Activity on Dopaminergic Neurons; Common Pathways Underlying Drug Addiction			2	9	1.146	1.145	0.961	0.578803	0.899638	0.856139	24.35	36.41	24.25	103	92.1	104.9	5.57	10.82	2.84	1.34138e+08	1.05842e+08	1.16644e+08	9.31035e+07	9.05896e+07	1.07194e+08	1.09737e+08	1.12916e+08	1.12296e+08	12	12	12
AAH96170.1	Histone cluster 1, H1e [OS=Homo sapiens]	0	220.221	42	17	229	5	219	21.9	11.03	520.13	17	Pf00538	3008	HIST1H1E	6					0	12	1.074	0.99	0.944	0.878316	0.876994	0.800392	25.99	34.11	32.05	104.4	98.4	97.2	10.46	5.19	4.54	1.32825e+09	1.43118e+09	1.42222e+09	1.3271e+09	1.22047e+09	1.16336e+09	1.28283e+09	1.23787e+09	1.33702e+09	20	19	18
CAA43795.1	colligin [OS=Homo sapiens]	0	154.649	42	13	88	1	417	46.2	8.28	283.11	13	Pf00079	871	SERPINH1	11		Endochondral Ossification			1	0	1.428	0.769	0.613	0.166943	0.183971	0.000496203	25.17	24.38	30.32	100	70	130	22.52	28.34	31.4	8.28505e+06	10842840	1.21925e+07	5454057	7.17132e+06	9.13462e+06	8.28599e+06	14568873	15295127	1	1	1
BAD92985.1	spectrin, beta, non-erythrocytic 1 isoform 1 variant, partial [OS=Homo sapiens]	0	556.298	42	74	396	73	2377	276	5.53	900.44	74	Pf00169, Pf00307, Pf00435, Pf11971, Pf12128, Pf15410	6711	SPTBN1	2		TGF-beta Signaling Pathway			1	1	1.224	1.153	0.956	0.194516	0.890905	0.839222	25.88	30.62	28.84	112.9	95.2	91.9	3.62	0.59	6.27	4.43426e+08	4.09036e+08	4.51153e+08	3.68288e+08	3.25567e+08	3.45572e+08	3.23837e+08	3.59552e+08	3.41348e+08	66	65	67
NP_004716.1	mitotic checkpoint protein BUB3 isoform a [OS=Homo sapiens]	0	70.554	42	11	45	11	328	37.1	6.84	101.02	11	Pf00400, Pf04762	9184	BUB3	10	ENSG00000154473.17	Cell Cycle	HTLV-I infection; Cell cycle	Inactivation of APC/C via direct inhibition of the APC/C complex; Amplification of signal from unattached kinetochores via a MAD2 inhibitory signal; Separation of Sister Chromatids; Resolution of Sister Chromatid Cohesion; RHO GTPases Activate Formins; Cdc20:Phospho-APC/C mediated degradation of Cyclin A; APC-Cdc20 mediated degradation of Nek2A	29	0	1.065	1.086	1.072	0.92669	0.983413	0.929234	20.32	24.83	21.43	106.2	102.2	91.7	5.97	7.34	5.37	76469638	5.93502e+07	6.7527e+07	6.6603e+07	5.06333e+07	5.97009e+07	6.09865e+07	53946416	5.50001e+07	9	11	10
BAA03941.1	enoyl-CoA hydratase/3-hydroxyacyl-CoA dehydrogenase alpha-subunit of trifunctional protein [OS=Homo sapiens]	0	258.204	42	28	166	28	763	82.9	9.04	425.07	28	Pf00378, Pf00725, Pf02737	3030	HADHA	2		Fatty Acid Beta Oxidation; Mitochondrial LC-Fatty Acid Beta-Oxidation; Sudden Infant Death Syndrome (SIDS) Susceptibility Pathways			3	0	0.969	1.127	1.129	0.845482	0.926059	0.799982	35.5	30.74	32.94	105	104.5	90.5	3.78	12.04	7.84	2.1895e+08	1.77618e+08	1.97711e+08	2.26013e+08	1.70977e+08	1.65706e+08	1.57869e+08	1.79914e+08	1.60714e+08	26	27	27
NP_001184222.1	Dihydropyrimidinase-related protein 2 isoform 1 [OS=Homo sapiens]	0	237.451	42	19	145	8	677	73.5	6.35	443.29	19	Pf01979, Pf07969, Pf13147, Pf13594	1808	DPYSL2	8	ENSG00000092964.17	Regulation of Microtubule Cytoskeleton; Brain-Derived Neurotrophic Factor (BDNF) signaling pathway			2	11	1.013	0.975	0.971	0.980206	0.839232	0.883272	15.65	21.46	15.39	98	102.4	99.6	12.37	4.67	6.13	2.06242e+08	2.22511e+08	2.47048e+08	2.30776e+08	2.19913e+08	2.32084e+08	2.15828e+08	2.33595e+08	2.35552e+08	18	19	18
NP_060377.1	ragulator complex protein LAMTOR1 [OS=Homo sapiens]	0	27.056	42	4	20	4	161	17.7	5.15	46.94	4	Pf15454	55004	LAMTOR1	11	ENSG00000149357.9		mTOR signaling pathway	Energy dependent regulation of mTOR by LKB1-AMPK; Neutrophil degranulation; Regulation of PTEN gene transcription; mTORC1-mediated signalling; TP53 Regulates Metabolic Genes; Macroautophagy	19	0	0.949	1.083	1.126	0.856623	0.986889	0.804184	29.85	37.98	30.74	98.2	108.8	93	17.56	17.73	7.75	12343928	7.54435e+06	1.01737e+07	1.2374e+07	7.58253e+06	1.03526e+07	8.80054e+06	9.15837e+06	9973507	4	4	4
NP_003748.1	Eukaryotic translation initiation factor 3 subunit I [OS=Homo sapiens]	0	104.329	42	12	84	12	325	36.5	5.64	138.93	12	Pf00400	8668	EIF3I	1	ENSG00000084623.11	Translation Factors	RNA transport	Formation of the ternary complex, and subsequently, the 43S complex; L13a-mediated translational silencing of Ceruloplasmin expression; Translation initiation complex formation; GTP hydrolysis and joining of the 60S ribosomal subunit; Formation of a pool of free 40S subunits; Ribosomal scanning and start codon recognition	13	0	0.985	1.061	1.078	0.887638	0.986691	0.915509	15.89	31.5	26.71	103.1	106.8	90.1	0.44	5.4	8.61	1.52503e+08	1.33997e+08	1.44499e+08	1.54245e+08	1.30297e+08	1.285e+08	1.36149e+08	1.12634e+08	1.19396e+08	11	11	11
NP_036590.1	mitochondrial import inner membrane translocase subunit TIM13 [OS=Homo sapiens]	0	28.483	42	3	23	3	95	10.5	8.18	55.04	3	Pf02953	26517	TIMM13	19	ENSG00000099800.7			Mitochondrial protein import; Metabolism of proteins	2	0	1.079	1.154	1.061	0.915175	0.890519	0.94988	24.01	36.21	18.1	115.1	108.7	76.2	13.72	8.07	19.96	56245391	4.21029e+07	4.06871e+07	4.51721e+07	3.75587e+07	35675963	40477581	2.82824e+07	2.85677e+07	3	3	3
AAF67013.1	VAMP-associated 33 kDa protein [OS=Homo sapiens]	0	65.72	42	9	48	8	243	27.1	7.78	103.21	9	Pf00635, Pf00843	9217	VAPB	20					0	0	0.94	0.949	0.983	0.728913	0.786309	0.901824	26.44	25.57	16.53	105.5	95.5	98.9	16.61	15.35	4.12	7.98236e+07	5.86983e+07	5.43585e+07	6.90428e+07	4.48901e+07	5.30944e+07	6.1291e+07	5.68777e+07	55032560	8	7	7
BAD92832.1	DEAD box polypeptide 17 isoform p82 variant, partial [OS=Homo sapiens]	0	192.225	42	29	180	22	737	81	7.93	355.77	29	Pf00270, Pf00271	10521	DDX17	22					0	7	1.066	1.062	1.027	0.896708	0.988004	0.993203	27.27	33.2	26.95	110	98.3	91.7	6.24	3.92	1.43	2.9638e+08	2.88154e+08	3.14879e+08	2.92476e+08	2.37805e+08	2.57192e+08	2.48451e+08	2.48084e+08	2.48631e+08	26	28	29
NP_003783.1	Endothelial differentiation-related factor 1 isoform alpha [OS=Homo sapiens]	0	49.794	42	6	38	6	148	16.4	9.95	74.5	6	Pf01381, Pf08523, Pf12844, Pf13560	8721	EDF1	9	ENSG00000107223.12				0	0	1.015	0.973	0.998	0.966871	0.834567	0.938339	20.74	26.27	25.4	98.8	97.7	103.5	11.95	6.73	6.95	3.11554e+07	33354133	37022522	3.33579e+07	3.34614e+07	3.29478e+07	3.68539e+07	3.79834e+07	3.28228e+07	4	5	5
AAQ13495.1	FWP004 [OS=Homo sapiens]	0	69.196	42	11	113	11	203	23.6	11.02	178.72	11	Pf00572		RPL13AP25						0	0	0.98	1.15	1.161	0.87434	0.890905	0.705954	26.94	31.36	32.73	101.5	103.5	94.9	7.62	3.59	3.08	3.1929e+08	2.49261e+08	2.62929e+08	2.77317e+08	2.40051e+08	2.40232e+08	2.47682e+08	2.2921e+08	2.39074e+08	10	10	10
AAA85659.1	ribosomal protein S9 [OS=Homo sapiens]	0	67.282	42	13	95	13	194	22.6	10.74	189.63	13	Pf00163, Pf01479	6203	RPS9	19		Cytoplasmic Ribosomal Proteins			1	0	1.089	1.137	1.04	0.839068	0.91118	0.988869	23.53	23.95	18.52	108.8	95.8	95.4	4.84	4.79	3.7	3.61005e+08	2.89812e+08	3.15919e+08	2.97621e+08	2.4168e+08	2.53287e+08	2.8526e+08	2.6338e+08	2.59579e+08	13	13	13
BAD96302.1	PKCI-1-related HIT protein variant, partial [OS=Homo sapiens]	0	31.092	42	4	19	4	163	17.2	9.48	56.47	4	Pf01230, Pf11969	84681	HINT2	9					0	0	1.079	1.513	1.261	0.929844	0.162715	0.372412	34.44	59.18	58.73	145.7	138.6	15.7	26.04	21.03	102.49	1.21199e+07	1.65848e+07	1.95057e+07	1.17049e+07	1.48984e+07	1.63402e+07	1.8805e+06	9.43188e+06	1.67321e+06	3	4	4
AAA85336.1	Transmembrane protein [OS=Homo sapiens]	0	274.768	42	25	167	25	758	83.6	6.48	419.25	25	Pf07227, Pf09731	10989	IMMT	2					0	0	0.876	1.177	1.328	0.277914	0.83995	0.199304	35.15	42.5	32.38	97.9	107.1	95	5.46	6.12	6.78	1.58794e+08	1.33645e+08	1.35288e+08	1.7167e+08	1.3404e+08	1.45986e+08	1.26031e+08	1.41477e+08	1.32934e+08	22	22	22
AAH03667.1	ribosomal protein S27-like [OS=Homo sapiens]	0	21.511	42	4	26	1	84	9.5	9.11	38.99	4	Pf01667	51065	RPS27L	15					0	0	1.298	1.532	1.189	0.839068	0.627791	0.883272	14.96	13.87	6.95	124.3	94.6	81.1	17.86	6.75	7.05	1.04809e+06	1.21596e+06	1.41993e+06		917092	881501	765182	820054	856869	1	1	1
EAW99923.1	RAB1A, member RAS oncogene family, isoform CRA_f [OS=Homo sapiens]	0	74.845	42	9	40	4	257	28.1	8.57	119.26	9	Pf00009, Pf00025, Pf00071, Pf01926, Pf04670, Pf08477, Pf09439	5861	RAB1A	2					0	4	0.986	1.027	0.994	0.887638	0.941295	0.928564	27.55	22.19	33.49	100.8	104.6	94.6	7.75	10.5	4.25	9.80025e+07	7.57142e+07	8.09408e+07	9.66526e+07	6.91057e+07	7.84932e+07	7.49712e+07	7.89789e+07	7.28618e+07	7	7	6
EAW65344.1	ADP-ribosylation factor 4, partial [OS=Homo sapiens]	0	48.864	42	5	38	2	161	18.3	5.17	109.32	5	Pf00025, Pf00071, Pf00503, Pf01926, Pf04670, Pf08477, Pf09439	378	ARF4	3					0	0	1.054	0.802	0.779	0.975587	0.2753	0.127492	10.99	31.17	21.61	97.5	91.6	111	10.03	3.93	5.99	4.26977e+07	4.53415e+07	4.35183e+07	4.04953e+07	3.61674e+07	3.54529e+07	4.80498e+07	4.79786e+07	4.25126e+07	2	2	2
AAH66306.1	SMT3 suppressor of mif two 3 homolog 1 (S. cerevisiae) [OS=Homo sapiens]	0	29.133	42	3	37	3	101	11.5	5.29	70.47	3	Pf00240, Pf11976	7341	SUMO1	2		Androgen receptor signaling pathway; TP53 Network; TGF-beta Signaling Pathway; Exercise-induced Circadian Regulation			4	0	0.998	1.055	1.104	0.915175	0.979857	0.872333	20.61	20.06	18.36	105.3	102.2	92.5	12.18	10.91	13.43	3.464e+07	3.78797e+07	4.06955e+07	3.36888e+07	36736411	3.62866e+07	3.01289e+07	3.86711e+07	3.37048e+07	3	3	3
BAF84412.1	unnamed protein product [OS=Homo sapiens]	0	317.437	42	29	241	29	760	84.8	6.61	658.4	29	Pf02225, Pf04253, Pf04389	7037	TFRC	3					0	0	0.791	0.891	1.182	0.0139971	0.599255	0.64067	36.14	40.32	34.52	88.7	114.1	97.2	22.53	13.54	11.22	2.96374e+08	1.69019e+08	2.09112e+08	3.29233e+08	2.27205e+08	2.47035e+08	2.66368e+08	2.17696e+08	2.1312e+08	25	25	26
ACO54885.1	REG gamma-3 variant [OS=Homo sapiens]	0	49.492	42	8	52	6	231	26.9	5.94	94.44	8	Pf02251, Pf02252	10197	PSME3	17	ENSG00000131467.10	Proteasome Degradation			1	2	1.011	1.07	1.059	0.966759	0.997632	0.955478	19.92	17.88	14.8	103.5	99.6	96.9	4.8	8.76	5.12	9.1717e+07	7.42394e+07	79791300	7.09679e+07	6.74584e+07	7.83752e+07	6.71358e+07	7.18433e+07	7.16213e+07	8	8	8
BAG35060.1	unnamed protein product [OS=Homo sapiens]	0	131.036	42	8	380	2	130	14.1	11.06	557.35	8	Pf00125, Pf00808	8969	HIST1H2AG	6			Systemic lupus erythematosus; Alcoholism		2	6	0.996	0.955	0.946	0.923992	0.80014	0.802875	33.46	24.65	24.8	95.5	96.3	108.2	7.77	2.15	5.93	3.24547e+09	3.18308e+09	3.58426e+09	3.45592e+09	2.93048e+09	3.22626e+09	3.98392e+09	3.46846e+09	3.69964e+09	8	8	8
NP_003503.1	Histone H2A type 1-C [OS=Homo sapiens]	0	131.561	42	8	309	2	130	14.1	11.05	452.78	8	Pf00125, Pf00808	8334	HIST1H2AC	6	ENSG00000180573.9		Alcoholism; Systemic lupus erythematosus	SIRT1 negatively regulates rRNA expression; UCH proteinases; RMTs methylate histone arginines; Activation of anterior HOX genes in hindbrain development during early embryogenesis; NoRC negatively regulates rRNA expression; Meiotic synapsis; Transcriptional regulation by small RNAs; Meiotic recombination; PRC2 methylates histones and DNA; HDACs deacetylate histones; Formation of the beta-catenin:…	66	0	1.059	1.05	1.029	0.915175	0.971923	0.995721	33.76	13.67	24.11	99.2	106.2	94.6	10.09	2.77	4.87	2.88864e+08	3.08329e+08	3.00643e+08	3.06955e+08	2.84279e+08	2.9539e+08	2.77879e+08	2.67166e+08	2.90578e+08	2	2	2
NP_001287847.1	high mobility group protein HMGI-C isoform c [OS=Homo sapiens]	0	52.989	42	5	27	5	118	12.7	11.75	108.84	5		8091	HMGA2	12	ENSG00000149948.13	Mesodermal Commitment Pathway			1	0	1.034	1.183	1.213	0.99773	0.830899	0.537062	29.63	34.85	15.97	117.2	106.2	76.6	4.72	11.2	5.63	3.25117e+07	2.67486e+07	28140272	2.61116e+07	2.3028e+07	1.98607e+07	1.98918e+07	1.74857e+07	1.79443e+07	4	4	3
BAD92022.1	phosphoribosylglycinamide formyltransferase, phosphoribosylglycinamide synthetase, phosphoribosylaminoimidazole synthetase isoform 1 variant, partial [OS=Homo sapiens]	0	306.265	41	28	175	28	1046	112.1	7.36	516.46	28	Pf00551, Pf00586, Pf01071, Pf02222, Pf02655, Pf02769, Pf02843, Pf02844, Pf03435, Pf07478, Pf08442, Pf08443, Pf13535, Pf15632	2618	GART	21		Folate Metabolism; One Carbon Metabolism			2	0	0.988	0.996	0.974	0.898808	0.890905	0.883272	32.72	29.66	26.02	95.3	102.1	102.6	4.43	4.02	2.23	1.81285e+08	1.47603e+08	1.58779e+08	1.70383e+08	1.39194e+08	1.57882e+08	1.67425e+08	1.63987e+08	1.69196e+08	26	26	26
NP_001295155.1	40S ribosomal protein S15 isoform 1 [OS=Homo sapiens]	0	72.85	41	5	89	5	152	17.7	10.39	185.2	5	Pf00203	6209	RPS15	19	ENSG00000115268.9	Cytoplasmic Ribosomal Proteins			1	0	1.122	1.5	1.211	0.690511	0.175026	0.542674	20.33	28.2	35.58	114.5	101.3	84.2	17.57	5.68	5.94	1.92325e+08	1.19854e+08	1.45682e+08	1.3246e+08	1.12026e+08	1.09793e+08	1.03271e+08	1.01838e+08	1.115e+08	5	4	4
EAX05327.1	hCG1990955, isoform CRA_a, partial [OS=Homo sapiens]	0	24.675	41	4	32	4	121	13.2	10.01	67.08	4	Pf00164								0	0	1.071	1.108	1.181	0.881607	0.959223	0.644448	9.21	26.96	26.12	112.1	106.3	81.6	1.21	4.51	12.62	2.20127e+08	1.96487e+08	2.09615e+08	2.08285e+08	1.72698e+08	1.76794e+08	172658834	1.32254e+08	1.43858e+08	4	4	4
XP_016864369.1	PREDICTED: WD repeat-containing protein 1 isoform X1 [OS=Homo sapiens]	0	167.919	41	19	87	19	659	72	6.9	195.88	19	Pf00400	9948	WDR1	4		Hypertrophy Model			1	0	1.057	0.962	0.895	0.926282	0.806695	0.609636	21.75	25.93	24.91	93.9	95.1	111	5.09	5.31	2.89	9.72428e+07	9.19134e+07	1.01703e+08	9.63645e+07	88004141	9.92376e+07	1.14621e+08	1.18036e+08	1.11497e+08	15	15	16
NP_003925.1	Far upstream element-binding protein 3 [OS=Homo sapiens]	0	115.657	41	16	76	14	572	61.6	8.38	139.1	16	Pf00013, Pf07650, Pf13014	8939	FUBP3	9	ENSG00000107164.15				0	0	0.978	1.016	1.031	0.867352	0.917292	0.997979	18.11	21.81	19.1	102.7	102.5	94.9	2.68	3.99	11.69	6.64627e+07	5.6712e+07	6.50549e+07	6.23894e+07	5.20115e+07	5.95347e+07	6.65639e+07	5.54168e+07	5.19416e+07	12	13	13
EAW71676.1	spermidine synthase, isoform CRA_b [OS=Homo sapiens]	0	55.799	41	8	31	1	313	34.9	5.49	63.73	8	Pf01564	6723	SRM	1		Nucleotide Metabolism; Urea cycle and metabolism of amino groups			2	7	1.012	1.055	1.007	0.966728	0.9791	0.956313	36.34	36.39	27.36	96.6	104.5	98.9	2.38	22.83	1.15	3.45327e+07	2.87573e+07	3.18881e+07	3.41742e+07	1.96333e+07	32110373	3.16677e+07	3.06915e+07	3.11751e+07	7	7	6
EAW60315.1	ribosomal protein L3, isoform CRA_f [OS=Homo sapiens]	0	279.335	41	22	246	22	430	48.8	10.27	650.53	22	Pf00297	6122	RPL3	22		Cytoplasmic Ribosomal Proteins			1	0	1.031	1.112	1.115	0.995901	0.954045	0.836431	23.9	25.81	32.09	106.7	107.6	85.7	9.33	1.91	4.44	3.88694e+08	2.89402e+08	3.15716e+08	3.22574e+08	2.7661e+08	2.88076e+08	2.64365e+08	2.39227e+08	2.39385e+08	20	20	18
EAW87706.1	adenylate kinase 1, isoform CRA_a [OS=Homo sapiens]	0	44.417	41	8	27	8	249	27.3	8.1	51.11	8	Pf00406, Pf01712, Pf06414, Pf13207, Pf13238, Pf13671	203	AK1	9					0	0	1.272	1.353	1.05	0.344718	0.437605	0.975333	31.06	34.25	18.78	118.8	81.7	99.5	10.1	18.25	6.86	3.45567e+07	2.62422e+07	2.70839e+07	2.62825e+07	1.70182e+07	1.80276e+07	20537538	2.27099e+07	2.25722e+07	6	6	6
NP_075266.1	long-chain-fatty-acid--CoA ligase 4 isoform 2 [OS=Homo sapiens]	0	152.211	41	22	110	21	711	79.1	8.38	292.65	22	Pf00501	2182	ACSL4	X	ENSG00000068366.19	Fatty Acid Beta Oxidation; Fatty Acid Biosynthesis; Mitochondrial LC-Fatty Acid Beta-Oxidation; PPAR signaling pathway	Fatty acid degradation; Fatty acid biosynthesis; Fatty acid metabolism; Metabolic pathways; PPAR signaling pathway; Peroxisome; Adipocytokine signaling pathway	Synthesis of very long-chain fatty acyl-CoAs	16	1	0.967	1.148	1.147	0.839147	0.893222	0.742031	17.66	27.43	19.42	105.5	108.9	85.6	8.45	7.18	5.92	8.45297e+07	6.85672e+07	6.7744e+07	6.83753e+07	6.6884e+07	7.28737e+07	5.87048e+07	6.34348e+07	5.67545e+07	22	20	18
BAD97172.1	SAR1a gene homolog 2 variant, partial [OS=Homo sapiens]	0	28.829	41	5	21	2	198	22.4	6.11	20.82	5	Pf00025, Pf00503, Pf01926, Pf08477, Pf09439	51128	SAR1B	5					0	0	1.22	1.298		0.913343	0.893414		25.44	0		132.1	108.3	59.5	47.07	9.78		1.55058e+06	547761	826964		549549	667501		354063		2	1	1
CAA56074.1	translation initiation factor [OS=Homo sapiens]	0	143.422	41	21	99	17	411	46.8	6.47	181.05	21	Pf00270, Pf00271	9775	EIF4A3	17					0	0	1.012	0.982	1.004	0.976255	0.85531	0.949116	33.4	42.28	18.98	98.9	101.9	99.2	8.97	3.43	0.51	1.88763e+08	1.86483e+08	2.14183e+08	2.18158e+08	1.81395e+08	1.89944e+08	1.9726e+08	1.91933e+08	1.92435e+08	14	15	15
EAW76674.1	PDGFA associated protein 1, isoform CRA_a [OS=Homo sapiens]	0	115.899	41	12	74	12	184	20.6	8.88	192.16	12	Pf10252	11333	PDAP1	7					0	0	0.981	0.984	1.005	0.871974	0.862287	0.951278	25.55	21.62	22.64	100.9	103.9	95.2	4.66	1.09	9.56	8.67623e+07	7.00823e+07	7.59268e+07	7.7686e+07	6.83924e+07	7.08594e+07	8.02442e+07	6.58845e+07	6.77863e+07	12	11	11
NP_000393.4	Glucose-6-phosphate 1-dehydrogenase isoform a [OS=Homo sapiens]	0	138.113	41	15	77	15	545	62.4	8.05	158.51	15	Pf00479, Pf02781	2539	G6PD	X	ENSG00000160211.15	Glutathione metabolism; Pentose Phosphate Pathway; Cori Cycle; NRF2 pathway; ATM Signaling Network in Development and Disease; Sulfation Biotransformation Reaction			6	0	1.067	0.915	0.863	0.893823	0.683772	0.462047	32.83	29.59	35.12	96.2	97.2	106.6	9.99	9.26	5.68	1.21744e+08	8.98842e+07	9.757e+07	1.11671e+08	8.57952e+07	8.70302e+07	1.03628e+08	1.02908e+08	1.11741e+08	12	13	12
BAH12875.1	unnamed protein product [OS=Homo sapiens]	0	64.225	41	5	44	1	194	22.3	6.54	130.36	5	Pf01997	7247	TSN	2					0	0	0.895	1.122	1.254	0.653656	0.938359	0.399288	4.94	11.45	13.02	99.7	111.4	88.9	3.55	6.14	9.78	1.60913e+07	1.5029e+07	1.55267e+07	1.66088e+07	16390297	15934016	1.48925e+07	1.20086e+07	13049755	1	1	1
EAW76220.1	integrin beta 4 binding protein, isoform CRA_b [OS=Homo sapiens]	0	112.582	41	6	81	6	258	28.2	4.94	291.78	6	Pf01912	3692	EIF6	20		Translation Factors			1	0	0.93	0.873	0.905	0.647339	0.529789	0.658553	24.11	27.13	11.73	94.4	97.8	107.8	6.9	2.73	8.19	1.36688e+08	1.03971e+08	1.20802e+08	1.21084e+08	1.08793e+08	1.18575e+08	1.46276e+08	1.21783e+08	1.30186e+08	6	6	6
NP_001155901.1	programmed cell death 6-interacting protein isoform 2 [OS=Homo sapiens]	0	226.061	41	27	161	27	873	96.7	6.52	312.29	27	Pf03097, Pf08391, Pf13949	10015	PDCD6IP	3	ENSG00000170248.13				0	0	1.115	1.051	0.963	0.730212	0.972839	0.864291	21.33	23.8	17.69	107.8	97.5	94.8	2.81	1.4	5.22	203077268	1.71654e+08	1.82353e+08	1.64125e+08	1.47958e+08	1.55094e+08	1.4597e+08	1.56005e+08	1.56356e+08	26	26	26
NP_057018.1	Nucleolar protein 58 [OS=Homo sapiens]	0	158.065	41	21	113	21	529	59.5	8.92	246.56	21	Pf01798, Pf08060, Pf08156	51602	NOP58	2	ENSG00000055044.10		Ribosome biogenesis in eukaryotes	Major pathway of rRNA processing in the nucleolus and cytosol; rRNA modification in the nucleus and cytosol; SUMOylation of RNA binding proteins	11	0	0.949	0.948	0.969	0.756149	0.784329	0.883272	24.27	31.28	24.62	96.8	98	105.2	7	10.34	8.71	1.44708e+08	1.11717e+08	1.22515e+08	1.44434e+08	1.07735e+08	1.11341e+08	1.46716e+08	1.22237e+08	1.25638e+08	18	18	18
EAW98136.1	hCG2016250, isoform CRA_k [OS=Homo sapiens]	0	100.501	41	11	133	11	293	31.3	10.24	221.12	11	Pf00333, Pf03719	100130562	RPS2P5	12					0	0	0.969	0.981	1.054	0.844052	0.851995	0.965453	13.56	19.82	15.36	101	103.4	95.7	4.63	3.34	2.28	4.59006e+08	3.85492e+08	3.97318e+08	4.06459e+08	3.80741e+08	3.94314e+08	3.99761e+08	3.75958e+08	3.74805e+08	9	9	10
NP_061322.2	Matrin-3 isoform a [OS=Homo sapiens]	0	240.683	41	24	183	24	847	94.6	6.25	452.02	24	Pf00076, Pf13893, Pf14259	9782	MATR3	5	ENSG00000015479.18; ENSG00000280987.4				0	0	1.112	1.162	1.012	0.742775	0.874018	0.968156	19.26	31.25	20.57	114.5	99.5	86	5.58	10.55	7.01	2.64227e+08	2.22265e+08	2.24587e+08	2.37869e+08	1.82518e+08	1.79728e+08	1.88614e+08	160631295	1.71398e+08	22	20	21
BAD93059.1	ADP,ATP carrier protein, liver isoform T2 variant, partial [OS=Homo sapiens]	0	122.861	41	16	147	4	323	35.4	9.85	239.11	16	Pf00153	293	SLC25A6	X|Y		Electron Transport Chain			1	0	0.988	1	0.972	0.915175	0.89225	0.883272	24.13	27.48	25.85	107.6	94.3	98.2	16.49	14.82	10.03	3.07675e+07	2.21016e+07	2.11389e+07	2.61652e+07	1.82952e+07	1.86139e+07	2.12667e+07	2.39169e+07	1.96132e+07	3	3	3
NP_001243572.1	leukotriene A-4 hydrolase isoform 2 [OS=Homo sapiens]	0	132.039	41	15	96	1	587	66.8	6.7	220.68	15	Pf01433, Pf09127, Pf13485	4048	LTA4H	12	ENSG00000111144.9	Eicosanoid Synthesis			1	0	1.87	0.944	0.505	0.32247	0.831877	0.0069746	49.73	59.29	43.9	115.7	61.9	122.5	6.04	46.73	54.47	553493		572404	206101	359171		375172		822295	1		1
NP_734466.1	Histone H2A type 1-A [OS=Homo sapiens]	0	81.386	40	6	192	2	131	14.2	10.86	146.61	6	Pf00125, Pf00808	221613	HIST1H2AA	6	ENSG00000164508.4		Systemic lupus erythematosus; Alcoholism	HDACs deacetylate histones; HATs acetylate histones; UCH proteinases; Ub-specific processing proteases; RMTs methylate histone arginines; Metalloprotease DUBs	13	0	0.178	1.502	8.446	7.54243e-07	0.757249	1.7785e-16	28.6	117.17	140.64	41.2	231.4	27.4	26.78		170.82		92174.1	147089	676316			40228.7	76825.5	1.2435e+07		1	1
BAF31287.1	BAT1 protein [OS=Homo sapiens]	0	178.077	40	18	166	7	443	50.6	5.88	381.85	18	Pf00270, Pf00271, Pf14617	7919	DDX39B	6					0	11	1.037	1.018	0.99	0.985751	0.922527	0.917849	25.13	30.88	25.46	101.1	97.9	101	4.95	3.94	7.44	2.56508e+08	2.33895e+08	2.68775e+08	2.43916e+08	2.08145e+08	2.37789e+08	2.2695e+08	2.41354e+08	2.56309e+08	18	18	18
AAH14961.1	Cytidine monophosphate (UMP-CMP) kinase 1, cytosolic [OS=Homo sapiens]	0	45.163	40	7	46	1	228	25.9	8.21	93.46	7	Pf00406, Pf02223, Pf06414, Pf13207, Pf13238, Pf13671	51727	CMPK1	1					0	6	1.012	1.208	1.098	0.961381	0.792104	0.883272	31.34	26.61	27.32	107.2	101.9	90.8	15.96	21.38	25.48	3.72506e+07	2.3678e+07	3.29554e+07	3.41106e+07	1.94122e+07	2.87747e+07	2.93848e+07	2.65148e+07	1.705e+07	7	6	7
NP_001002032.1	jupiter microtubule associated homolog 1 isoform 2 [OS=Homo sapiens]	0	58.597	40	4	49	4	181	19.9	8.32	178.34	4		51155	HN1; JPT1	17	ENSG00000189159.15				0	0	1.356	1.21	0.92	0.00670162	0.787492	0.713226	18.44	21.73	21.63	119.1	86.1	94.7	4.19	5.53	7.41	1.34816e+08	109431285	1.28163e+08	8.71662e+07	8.53545e+07	8.5016e+07	1.00911e+08	9.67187e+07	8.52816e+07	4	4	4
BAD92522.1	activated RNA polymerase II transcription cofactor 4 variant, partial [OS=Homo sapiens]	0	69.564	40	4	49	4	134	15.1	9.38	166.96	4	Pf02229	10923	SUB1	5					0	0	1.214	1.39	1.168	0.487422	0.358916	0.687821	35.69	30.25	25.78	115.7	103.5	80.8	4.57	3.27	10.47	4.69499e+07	4.05216e+07	4.09343e+07	3.906e+07	3.2903e+07	3.71336e+07	2.98402e+07	2.9029e+07	3.45045e+07	4	4	4
CAG46536.1	PTK9 [OS=Homo sapiens]	0	80.153	40	11	47	11	350	40.3	6.81	122.31	11	Pf00241	5756	TWF1	12					0	0	1.051	1.056	0.985	0.976236	0.98163	0.907778	20.14	27.74	21.77	104.5	99.2	96.3	2.26	11.96	14.35	4.88413e+07	4.35738e+07	4.5292e+07	4.36027e+07	3.94723e+07	3.32063e+07	4.14337e+07	4.18317e+07	3.15774e+07	9	9	7
EAW54485.1	hCG2024613, isoform CRA_b [OS=Homo sapiens]	0	46.198	40	7	33	7	261	30	5.73	68.63	7	Pf00226								0	0	1.136	1.281	1.079	0.818333	0.621578	0.913684	20.29	18.66	22.8	119.2	95.2	85.6	5.94	15.59	3.57	3.87225e+07	3.19975e+07	3.2643e+07	3.29137e+07	2.1225e+07	2.55182e+07	2.42289e+07	2.23039e+07	2.35675e+07	5	6	7
BAD92062.1	poly(rC)-binding protein 2 isoform b variant, partial [OS=Homo sapiens]	0	105.471	40	10	142	6	373	39.5	7.06	298.55	10	Pf00013, Pf13014	5094	PCBP2	12		mRNA Processing			1	0	1.245	1.376	1.085	0.129327	0.388634	0.899483	19.16	26.67	28.42	119.4	95	85.6	8	10.96	2.49	2.65615e+08	1.97521e+08	2.35533e+08	2.15036e+08	1.52946e+08	1.72067e+08	1.57925e+08	1.60536e+08	1.61181e+08	6	6	6
EAW55043.1	ras-related C3 botulinum toxin substrate 1 (rho family, small GTP binding protein Rac1), isoform CRA_d [OS=Homo sapiens]	0	69.044	40	10	77	9	219	24.2	7.75	140.02	10	Pf00071, Pf08477	5879	RAC1	7		Androgen receptor signaling pathway; Regulation of toll-like receptor signaling pathway; Physiological and Pathological Hypertrophy of the Heart; MicroRNAs in cardiomyocyte hypertrophy; Integrin-mediated Cell Adhesion; RANKL/RANK (Receptor activator of NFKB (ligand)) Signaling Pathway; Leptin signaling pathway; TNF related weak inducer of apoptosis (TWEAK) Signaling Pathway; Prolactin Signaling P…			32	1	1.027	1.04	0.986	0.998907	0.96669	0.911442	20.93	20.76	13.23	101	100.4	98.6	11.35	5.33	2.25	2.63475e+08	1.92313e+08	2.04556e+08	2.20403e+08	1.8045e+08	1.84246e+08	2.00205e+08	1.87844e+08	192574646	10	10	10
EAW93310.1	glutamyl-prolyl-tRNA synthetase, isoform CRA_b [OS=Homo sapiens]	0	344.025	40	44	245	44	1522	171.5	7.33	557.49	44	Pf00458, Pf00587, Pf00749, Pf01406, Pf03129, Pf03950, Pf09180, Pf14497	2058	EPRS	1		Parkinsons Disease Pathway			1	0	0.997	0.941	0.95	0.928032	0.761863	0.821602	32.06	45.72	30.92	103.3	99.4	97.4	6.89	7.72	12.83	2.39332e+08	1.82088e+08	2.11211e+08	2.2629e+08	1.7221e+08	1.86687e+08	2.38732e+08	1.88123e+08	1.87848e+08	39	37	38
AAA86463.1	Csa-19 [OS=Homo sapiens]	0	132.354	40	12	128	12	217	24.8	9.94	282.82	12	Pf00687	4736	RPL10A	6		Cytoplasmic Ribosomal Proteins			1	0	1.056	1.11	1.052	0.928032	0.955678	0.970476	21.62	22.3	21.79	106.7	98.5	94.8	6.13	1.14	1.5	4.04555e+08	3.32503e+08	3.39757e+08	3.30699e+08	2.84584e+08	3.0719e+08	3.19351e+08	3.05417e+08	3.02339e+08	10	11	11
NP_001290203.1	ATP-citrate synthase isoform 3 [OS=Homo sapiens]	0	365.403	40	36	295	36	1155	126.1	8.18	676.05	36	Pf00285, Pf00549, Pf02629, Pf08442	47	ACLY	17		Fatty Acid Biosynthesis			1	0	0.881	0.97	1.116	0.314193	0.828463	0.835755	30.27	36.28	27.35	98.2	105.9	95.9	2.77	1.27	2.47	5.2252e+08	4.31663e+08	4.81235e+08	5.13788e+08	4.5073e+08	4.66191e+08	4.55365e+08	4.38568e+08	4.56993e+08	34	33	33
AAD27776.1	60S ribosomal protein L36 [OS=Homo sapiens]	0	56.002	40	9	44	9	105	12.2	11.5	86.03	9	Pf01158	25873	RPL36	19		Cytoplasmic Ribosomal Proteins			1	0	1.054	0.969	0.986	0.936179	0.823857	0.910293	21.27	18.74	19.16	101.9	98.6	99.5	13.36	8.2	3.81	1.58312e+08	1.08422e+08	1.23006e+08	1.31043e+08	9.80103e+07	1.09302e+08	118577128	1.1412e+08	1.07162e+08	9	8	9
BAG54178.1	unnamed protein product [OS=Homo sapiens]	0	67.907	40	7	34	2	328	36.1	5.35	108.08	7	Pf00557	10988	METAP2	12					0	0
AAA35484.1	26S protease (S4) regulatory subunit [OS=Homo sapiens]	0	183.648	40	17	120	16	440	49.2	5.96	289.97	17	Pf00004, Pf00910, Pf01078, Pf05496, Pf05673, Pf05729, Pf07724, Pf07726, Pf07728, Pf13191, Pf13401	5700	PSMC1	14		Proteasome Degradation; Parkin-Ubiquitin Proteasomal System pathway			2	0	1.134	1.182	1.044	0.632489	0.831328	0.981047	20.37	31.36	32.69	115.5	100.9	83.6	1.07	1.89	9.24	1.94218e+08	1.71618e+08	1.88396e+08	1.61451e+08	1.37848e+08	1.51231e+08	1.27858e+08	1.28398e+08	1.47024e+08	13	13	13
AAB60395.1	glycogen phosphorylase B [OS=Homo sapiens]	0	185.149	40	24	100	19	843	96.6	6.71	219.58	24	Pf00343	5834	PYGB	20		Glycogen Metabolism			1	5	0.941	0.787	0.814	0.713557	0.233469	0.238264	34.11	33.44	35.73	95.8	89.4	114.8	9.73	13.4	1.29	8.33225e+07	5.98944e+07	7.41625e+07	8.53699e+07	5.95615e+07	6.35663e+07	8.61551e+07	8.39906e+07	8.54328e+07	21	21	20
NP_001166925.1	pyruvate dehydrogenase E1 component subunit alpha, somatic form, mitochondrial isoform 2 precursor [OS=Homo sapiens]	0	76.168	40	8	40	6	428	47.5	8.54	139.8	8	Pf00676	5160	PDHA1	X	ENSG00000131828.13	TCA Cycle and Deficiency of Pyruvate Dehydrogenase complex (PDHc); Amino Acid metabolism; Acetylcholine Synthesis; Glycolysis and Gluconeogenesis			4	2	0.897	1.055	1.122	0.612812	0.980082	0.820977	37.01	43.17	38.89	98.6	123.5	77.9	18.33	9.96	20.36	2.49256e+07	1.82273e+07	1.63551e+07	2.76657e+07	1.99362e+07	2.28227e+07	1.07698e+07	1.48851e+07	1.56747e+07	7	7	6
AAI07805.1	PSMC3 protein, partial [OS=Homo sapiens]	0	116.546	40	16	94	16	491	55	5.52	210.56	16	Pf00004, Pf01078, Pf05496, Pf07724, Pf07728, Pf13191	5702	PSMC3	11		Proteasome Degradation; Parkin-Ubiquitin Proteasomal System pathway			2	0	1.215	1.193	1.016	0.263387	0.810015	0.975333	23.84	29.48	32.76	103.2	98.5	98.3	4.51	5.49	4.43	8.37354e+07	6.84597e+07	8.12611e+07	6.88207e+07	6.59171e+07	7.07808e+07	7.33763e+07	7.68699e+07	7.02579e+07	14	13	14
BAG35501.1	unnamed protein product [OS=Homo sapiens]	0	100.001	40	8	74	5	340	37.3	6.18	204.63	8	Pf00400	2782	GNB1	1		Nicotine Activity on Dopaminergic Neurons; Human Thyroid Stimulating Hormone (TSH) signaling pathway; Corticotropin-releasing hormone signaling pathway; Myometrial Relaxation and Contraction Pathways; G Protein Signaling Pathways; Calcium Regulation in the Cardiac Cell; Estrogen signaling pathway			7	0	0.946	1.169	1.227	0.789862	0.85749	0.490871	26.45	23.46	8.8	119	103.6	77.3	18.95	4	7.97	42848270	3.79343e+07	2.88554e+07	3.57055e+07	28988014	3.25279e+07	2.56204e+07	2.78707e+07	2.37092e+07	4	4	4
AAH53343.1	Karyopherin alpha 2 (RAG cohort 1, importin alpha 1) [OS=Homo sapiens]	0	143.37	40	14	109	14	529	57.8	5.4	340.47	14	Pf00514, Pf01749, Pf13513, Pf13646	3838	KPNA2	17					0	0	1.233	1.252	1.026	0.162229	0.694033	0.990741	32.97	37.57	30.63	114.6	105.7	79.7	5.34	11.2	15.41	1.56405e+08	1.25921e+08	1.34506e+08	1.06816e+08	1.17089e+08	1.16024e+08	7.9483e+07	9.04643e+07	1.05246e+08	13	13	13
EAW75996.1	topoisomerase (DNA) I, isoform CRA_b [OS=Homo sapiens]	0	212.613	40	26	147	26	768	91.2	9.23	318.5	26	Pf01028, Pf02919, Pf14370	7150	TOP1	20					0	0	1.01	0.917	0.893	0.972412	0.694033	0.601452	22.03	26.17	25.07	96.2	91.9	111.9	8.24	7.73	1.99	1.64937e+08	1.23521e+08	1.38671e+08	1.43323e+08	1.07849e+08	1.21668e+08	1.59396e+08	1.53357e+08	1.49014e+08	23	20	20
BAD96399.1	proteasome 26S non-ATPase subunit 12 isoform 1 variant, partial [OS=Homo sapiens]	0	115.172	39	17	62	17	456	52.9	7.36	179.23	17	Pf01399	5718	PSMD12	17		Proteasome Degradation; Parkin-Ubiquitin Proteasomal System pathway			2	0	1.075	1.092	0.984	0.908024	0.974904	0.906786	24.75	30.44	29.47	95.3	95.4	109.3	3.71	12.52	4.56	7.31998e+07	5.94872e+07	6.60449e+07	5.6972e+07	5.73882e+07	6.79857e+07	6.78238e+07	7.19711e+07	7.15301e+07	16	16	16
BAE06097.2	MYO1C variant protein [OS=Homo sapiens]	0	205.527	39	35	173	35	1063	121.6	9.42	371.87	35	Pf00063, Pf06017	4641	MYO1C	17		Insulin Signaling			1	0	1.096	1.049	0.936	0.811295	0.970674	0.769844	29.39	31.73	25.25	105.8	98.3	95.9	9.22	3.95	3.73	2.32741e+08	2.39241e+08	2.60793e+08	2.50488e+08	210016857	2.14798e+08	2.28583e+08	2.21533e+08	2.35596e+08	28	30	30
AAH18847.2	TALDO1 protein, partial [OS=Homo sapiens]	0	103.173	39	13	101	13	336	37.4	6.81	166.22	13	Pf00923	6888	TALDO1	11		Pentose Phosphate Pathway			1	0	1.072	1.103	1.005	0.881607	0.967473	0.950105	11.18	17.65	13.58	104.9	98.3	96.8	3.66	4.48	4.87	3.3417e+08	3.13526e+08	3.25642e+08	3.02163e+08	274666265	265643880	2.91204e+08	2.95181e+08	2.66006e+08	12	12	12
NP_057146.1	Mitotic spindle-associated MMXD complex subunit MIP18 [OS=Homo sapiens]	0	24.228	39	3	4	3	163	17.7	5.19	11.26	3	Pf01883	51647	FAM96B	16	ENSG00000166595.11			Cytosolic iron-sulfur cluster assembly	2	0	0.874	0.967	1.17	0.654985	0.818877	0.679571	26.39	33.28	34.15	106.1	138.3	55.6	41.96	42.3	14.86	4.09527e+06	8.89899e+06	7.20117e+06	4.22516e+06	8.15502e+06	9.95781e+06	2.93556e+06	3.58877e+06	3.8417e+06	3	3	3
XP_016862510.1	PREDICTED: protein SEC13 homolog isoform X4 [OS=Homo sapiens]	0	58.097	39	6	27	6	298	33.1	5.57	105.86	6	Pf00400	6396	SEC13	3					0	0	1.006	0.928	0.957	0.957769	0.728521	0.840881	24.24	29.09	37.18	103.9	94.6	101.5	4.73	14.64	7.94	20992418	1.73825e+07	1.81395e+07	2.11123e+07	1.41567e+07	1.58009e+07	2.0377e+07	1.73767e+07	1.7409e+07	5	5	5
BAH11971.1	unnamed protein product [OS=Homo sapiens]	0	261.875	39	33	233	26	1023	112.8	5.53	534.65	33	Pf00122, Pf00689, Pf00690, Pf00702, Pf08282, Pf12710, Pf13246	476	ATP1A1	1					0	7	0.951	1.146	1.129	0.762888	0.898925	0.799982	19.61	29.57	20	102.7	107.4	90	10.38	5.21	4.06	5.31715e+08	3.93046e+08	4.20513e+08	4.71395e+08	3.73085e+08	4.10516e+08	3.85057e+08	3.55905e+08	3.46775e+08	30	31	31
AAH31061.1	minichromosome maintenance complex component 4 [OS=Homo sapiens]	0	228.464	39	25	161	25	863	96.5	6.74	341.25	25	Pf00493, Pf07728, Pf14551	4173	MCM4	8		Cell Cycle; Gastric Cancer Network 1; Retinoblastoma (RB) in Cancer; G1 to S cell cycle control; DNA Replication			5	0	1.089	1.24	1.139	0.838411	0.721038	0.769845	25.33	31.98	29.04	108.5	103.5	88	12.58	5.94	18.35	1.83623e+08	2.05e+08	2.12365e+08	1.80971e+08	1.75812e+08	1.86851e+08	1.5385e+08	2.11825e+08	1.62432e+08	22	24	25
CAG33053.1	PSMD3 [OS=Homo sapiens]	0	143.225	39	18	90	18	534	60.9	8.44	185.21	18	Pf01399, Pf08375	5709	PSMD3	17		Proteasome Degradation; Parkin-Ubiquitin Proteasomal System pathway			2	0	1.165	1.168	0.981	0.508279	0.860169	0.897247	31.06	34.66	23.58	113.3	94	92.7	1.53	5.52	8.5	9.60592e+07	8.17059e+07	8.88053e+07	7.30594e+07	6.03673e+07	7.1299e+07	7.03138e+07	7.97017e+07	6.86202e+07	16	15	16
NP_001317604.1	proteasome subunit alpha type-4 isoform 4 [OS=Homo sapiens]	0	92.561	39	9	65	9	230	26.3	8.32	206.72	9	Pf00227	5685	PSMA4	15	ENSG00000041357.15	Proteasome Degradation; Exercise-induced Circadian Regulation			2	0	1.234	1.383	1.104	0.314232	0.373967	0.871685	35.26	35.1	25.51	111.4	99.3	89.3	5.05	7.39	1.56	6.94475e+07	5.48062e+07	6.26842e+07	6.01962e+07	4.55908e+07	5.13363e+07	4.75394e+07	4.79494e+07	4.74208e+07	9	9	9
NP_003306.3	DnaJ homolog subfamily C member 7 isoform 1 [OS=Homo sapiens]	0	129.215	39	13	49	13	494	56.4	6.96	109.41	13	Pf00226, Pf00515, Pf07719, Pf13414, Pf13424, Pf13431, Pf13432	7266	DNAJC7	17	ENSG00000168259.14	Constitutive Androstane Receptor Pathway		Regulation of HSF1-mediated heat shock response	5	0	1.124	1.246	1.129	0.839068	0.708664	0.799982	20.84	31.72	23.42	126.8	91.3	81.9	15.57	10.74	6.39	4.3977e+07	3.80756e+07	3.12991e+07	2.79279e+07	3.00353e+07	2.74012e+07	2.40973e+07	2.5423e+07	2.6642e+07	10	10	9
AAH09503.2	Gspt1 protein [OS=Homo sapiens]	0	175.352	39	15	108	15	633	68.4	5.33	276.84	15	Pf00009, Pf03143, Pf03144, Pf07145	2935	GSPT1	16					0	0	0.937	1.006	1.143	0.674959	0.905161	0.757648	26.8	36.71	31.63	99.9	105.6	94.5	13.54	9.23	3.92	1.4331e+08	9.75479e+07	1.11565e+08	1.28813e+08	9.39749e+07	1.08378e+08	1.04817e+08	9.50957e+07	9.9583e+07	13	13	13
NP_694546.1	26S proteasome regulatory subunit 6B isoform 2 [OS=Homo sapiens]	0	103.024	39	10	115	2	387	43.5	5.26	201.42	10	Pf00004, Pf00006, Pf00910, Pf01057, Pf01078, Pf05496, Pf07724, Pf07726, Pf07728, Pf13191	5704	PSMC4	19; CHR_HG2021_PATCH	ENSG00000281221.2; ENSG00000013275.7	Proteasome Degradation; Parkin-Ubiquitin Proteasomal System pathway			2	0	1.046	1.008	0.979	0.980794	0.90775	0.893623	11.35	12	10.5	102.4	95.3	102.3	4.19	2.28	15.53	7.74458e+07	6.40023e+07	6.77665e+07	6.419e+07	5.80294e+07	5.86944e+07	7.79139e+07	6.61039e+07	5.54143e+07	2	2	2
NP_055112.2	persulfide dioxygenase ETHE1, mitochondrial isoform 1 [OS=Homo sapiens]	0	51.034	39	6	39	6	254	27.9	6.83	106.78	6	Pf00753, Pf12706	23474	ETHE1	19	ENSG00000105755.7		Sulfur metabolism	Sulfide oxidation to sulfate	6	0	1.023	1.061	1.015	0.986795	0.986202	0.97383	22.21	25.91	10.3	105.5	99.2	95.3	5.81	2.11	5.11	2.61296e+07	2.52987e+07	2.74606e+07	2.53795e+07	2.24342e+07	2.44929e+07	2.40703e+07	2.31518e+07	2.5279e+07	5	6	6
NP_005310.1	Histone H1.2 [OS=Homo sapiens]	0	184.378	39	15	204	3	213	21.4	10.93	458.04	15	Pf00538	3006	HIST1H1C	6	ENSG00000187837.3			Formation of Senescence-Associated Heterochromatin Foci (SAHF); Activation of DNA fragmentation factor	10	0	1.004	0.729	0.728	0.952006	0.105051	0.0375409	19.63	20.45	12.33	99.1	84.9	116	14.86	14.16	6.97	8.57561e+07	9.90941e+07	1.05478e+08	8.46416e+07	9.63823e+07	8.29652e+07	106485467	1.187e+08	1.16463e+08	4	4	4
NP_001288172.1	rho GDP-dissociation inhibitor 1 isoform e [OS=Homo sapiens]	0	89.38	39	7	69	7	249	27.5	5.01	203.86	7	Pf02115	396	ARHGDIA	17					0	0	1.061	0.979	0.93	0.915175	0.846908	0.745786	15.99	16.24	19.39	101.6	95.4	103	3.93	0.88	3.94	1.15089e+08	108604359	1.1501e+08	1.08508e+08	93788480	99053092	1.13042e+08	114063420	1.04697e+08	7	7	7
BAG62522.1	unnamed protein product [OS=Homo sapiens]	0	77.158	39	9	63	9	201	22.4	8.53	168.72	9	Pf02221	10577	NPC2	14					0	0	1.239	1.139	0.912	0.244223	0.909302	0.683628	39.9	37.9	30.94	95.4	101.5	103	26.19	21.65	11.84	5.39156e+07	6.2997e+07	8.73322e+07	4.81766e+07	6.33342e+07	67077343	6.03137e+07	7.03018e+07	7.42006e+07	8	9	9
NP_003960.1	NEDD8-conjugating enzyme Ubc12 [OS=Homo sapiens]	0	39.366	39	7	42	7	183	20.9	7.69	76.05	7	Pf00179	9040	UBE2M	19	ENSG00000130725.7		Ubiquitin mediated proteolysis	TGF-beta receptor signaling activates SMADs; NIK-->noncanonical NF-kB signaling; Dectin-1 mediated noncanonical NF-kB signaling; Antigen processing: Ubiquitination & Proteasome degradation; Neddylation	19	0	0.919	0.957	1.016	0.623014	0.801912	0.975333	22.61	34.81	20.46	96.9	106.6	96.5	6.2	4.56	4.46	7.53242e+07	5.83048e+07	6.58998e+07	7.17555e+07	6.45884e+07	6.24569e+07	6.77804e+07	6.1038e+07	6.18481e+07	7	7	7
NP_005372.2	Nucleolin [OS=Homo sapiens]	0	518.465	39	34	494	34	710	76.6	4.7	1529.41	34	Pf00076, Pf13893, Pf14259	4691	NCL	2	ENSG00000115053.15	Pathogenic Escherichia coli infection; VEGFA-VEGFR2 Signaling Pathway	Pathogenic Escherichia coli infection	Major pathway of rRNA processing in the nucleolus and cytosol	7	0	0.917	0.818	0.909	0.570946	0.329902	0.672276	33.37	33.26	35.69	95.1	99.5	105.4	5.92	11.14	13.07	9.58498e+08	7.43164e+08	8.59815e+08	1.00424e+09	7.81088e+08	7.46016e+08	1.07863e+09	9.05046e+08	8.11689e+08	34	33	34
AAH03656.1	Minichromosome maintenance complex component 5 [OS=Homo sapiens]	0	148.221	39	20	157	20	734	82.3	8.46	320.51	20	Pf00493, Pf07515, Pf07728, Pf14551	4174	MCM5	22		Cell Cycle; G1 to S cell cycle control; DNA Replication			3	0	1.024	1.003	1.006	0.99773	0.899638	0.953552	18.91	21.06	18.78	79.3	76.2	144.5	5.4	10.97	44.29	1.43577e+08	1.39198e+08	1.47628e+08	1.17611e+08	1.23153e+08	1.3467e+08	2.60637e+08	3.64359e+08	1.38993e+08	18	19	19
BAD96889.1	phosphoribosyl pyrophosphate synthetase 1 variant, partial [OS=Homo sapiens]	0	85.958	39	8	72	5	318	34.8	6.79	173.56	8	Pf00156, Pf13793, Pf14572	5631	PRPS1	X		Nucleotide Metabolism			1	3	1.122	1.136	1.068	0.717575	0.91118	0.936501	21.33	26.46	28.53	111.9	101.1	87	2.33	8.04	2.19	9.38188e+07	8.49716e+07	8.85467e+07	8.94333e+07	6.99467e+07	7.12745e+07	6.66787e+07	6.80852e+07	6.53739e+07	8	8	8
O00410.4	RecName: Full=Importin-5; Short=Imp5; AltName: Full=Importin subunit beta-3; AltName: Full=Karyopherin beta-3; AltName: Full=Ran-binding protein 5; Short=RanBP5 [OS=Homo sapiens]	0	269.726	39	33	198	33	1097	123.6	4.94	443.69	33	Pf02985, Pf12755, Pf13513, Pf13646	3843	IPO5	13	ENSG00000065150.18			vRNP Assembly	6	0	1.094	1.191	1.02	0.818333	0.813686	0.981047	24.71	31.63	25.59	104.3	97.8	97.9	7.48	1.78	5.53	1.90838e+08	1.4362e+08	1.72757e+08	1.65154e+08	1.40215e+08	1.48892e+08	1.60813e+08	1.4173e+08	1.53059e+08	31	28	28
NP_001034933.1	acyl-CoA-binding domain-containing protein 7 [OS=Homo sapiens]	0	11.716	39	2	5	2	88	9.8	6.71	13.65	2	Pf00887	414149	ACBD7	10	ENSG00000176244.6			Mitochondrial Fatty Acid Beta-Oxidation	4	0	1.174	1.021	0.87	0.915175	0.91118	0.608323	12	24.06	21.96	107.1	94.8	98.1	25.47	28.14	10.89	1.37799e+06	1.30896e+06	849014	683696	1.05343e+06	1.06375e+06	1.09914e+06	1.13936e+06	1.31457e+06	1	1	1
EAX05872.1	heterogeneous nuclear ribonucleoprotein D (AU-rich element RNA binding protein 1, 37kDa), isoform CRA_a [OS=Homo sapiens]	0	235.673	38	17	194	15	377	40.8	6.7	428.73	17	Pf00076, Pf13893, Pf14259	3184	HNRNPD	4		mRNA Processing			1	2	1.06	1.026	0.921	0.915175	0.941066	0.717401	38.12	35.91	25.61	102.2	93.7	104.1	7.22	10.59	1.15	3.9452e+08	3.03369e+08	3.32847e+08	3.54683e+08	2.56455e+08	2.80203e+08	3.28247e+08	3.28274e+08	3.19609e+08	17	17	17
EAW91426.1	hCG2027326 [OS=Homo sapiens]	0	32.3	38	4	38	1	91	10.3	9.25	68.77	4	Pf01667								0	3	1.118	1.142	1.064	0.709586	0.905161	0.94838	12.9	37.75	37.95	115.1	103.8	81.1	7.56	3.94	14.01	3.14162e+08	2.38946e+08	2.65454e+08	2.5293e+08	2.08022e+08	2.18682e+08	2.26935e+08	1.74411e+08	1.76351e+08	4	3	4
AAQ15217.1	FP585 [OS=Homo sapiens]	0	83.134	38	13	70	13	346	37.4	7.17	113.59	13	Pf01012	2109	ETFB	19					0	0	0.929	1.048	1.12	0.6387	0.970674	0.824192	24.88	20.25	15.1	89.6	110.8	99.7	8.05	8.32	4.2	7.69362e+07	7.47442e+07	8.57424e+07	8.59321e+07	8.74139e+07	9.23722e+07	9.19228e+07	8.59454e+07	8.22503e+07	12	13	13
NP_036339.1	heterogeneous nuclear ribonucleoprotein H3 isoform a [OS=Homo sapiens]	0	99.548	38	8	73	8	346	36.9	6.87	187.46	8	Pf00076, Pf14259	3189	HNRNPH3	10	ENSG00000096746.17				0	0	1.091	1.036	0.978	0.870214	0.956994	0.893275	22.53	31	23	102.9	96.3	100.7	5.81	3.3	11.72	4.91897e+07	4.31612e+07	5.16976e+07	4.35076e+07	3.62906e+07	4.08762e+07	4.45267e+07	4.41157e+07	3.52814e+07	6	7	6
BAC16799.1	P53 [OS=Homo sapiens]	0	61.692	38	9	54	9	393	43.7	6.83	126.61	9	Pf00870, Pf07710, Pf08563	7157	TP53	17		miRNAs involved in DNA damage response; Fluoropyrimidine Activity; TP53 Network; Folate Metabolism; Apoptosis Modulation and Signaling; Cell Cycle; Gastric cancer network 2; Oncostatin M Signaling Pathway; Retinoblastoma (RB) in Cancer; Amyotrophic lateral sclerosis (ALS); Apoptosis; Bladder Cancer; Photodynamic therapy-induced HIF-1 survival signaling; TGF-beta Signaling Pathway; MAPK Signaling …			19	0	0.887	0.836	0.925	0.509237	0.390834	0.726523	21.71	25.72	18.99	91.1	104.3	104.6	15.81	23.24	5.46	2.90145e+07	3.46331e+07	3.53535e+07	5.59674e+07	3.22054e+07	3.71602e+07	3.82021e+07	3.85409e+07	4.12631e+07	7	7	8
NP_036335.1	Glyoxylate reductase/hydroxypyruvate reductase [OS=Homo sapiens]	0	70.051	38	7	42	7	328	35.6	7.39	115.02	7	Pf00389, Pf01488, Pf02826, Pf03446, Pf03807	9380	GRHPR	9	ENSG00000137106.17		Glycine, serine and threonine metabolism; Metabolic pathways; Glyoxylate and dicarboxylate metabolism; Pyruvate metabolism	Glyoxylate metabolism and glycine degradation	7	0	0.995	0.975	0.996	0.921621	0.837306	0.932861	18.19	25.48	17.76	88.7	105.6	105.7	16.05	1.77	2.44	4.17625e+07	2.98828e+07	4.49903e+07	4.54888e+07	4.10224e+07	4.36115e+07	4.58169e+07	4.36497e+07	4.54917e+07	7	6	7
AAC08964.1	Breakpoint cluster region protein 1 [OS=Homo sapiens]	0	52.911	38	7	36	7	138	15.5	6.54	87.68	7	Pf02961	8815	BANF1	11					0	0	1.212	1.242	0.95	0.471475	0.717927	0.822428	22.1	32.53	32.73	105.6	92.7	101.8	4.02	4.37	4.15	5.01513e+07	4.04276e+07	4.6299e+07	4.02581e+07	3.27707e+07	3.74882e+07	4.03252e+07	4.24191e+07	4.22717e+07	6	6	6
EAW97557.1	leukotriene A4 hydrolase, isoform CRA_a [OS=Homo sapiens]	0	128.98	38	16	104	2	610	69.1	6.27	239.88	16	Pf01433, Pf09127, Pf13485	4048	LTA4H	12		Eicosanoid Synthesis			1	13	0.885	1.013	1.108	0.349387	0.915469	0.859004	27.94	29.88	21.92	98.3	106.9	94.8	1.46	15.35	9.77	7.93384e+07	6.83829e+07	7.31669e+07	9.70327e+07	70290533	6.68227e+07	8.02251e+07	6.81357e+07	6.50933e+07	14	14	14
EAW60452.1	NHP2 non-histone chromosome protein 2-like 1 (S. cerevisiae), isoform CRA_b [OS=Homo sapiens]	0	21.301	38	2	22	2	73	8	7.87	59.23	2	Pf01248	4809	NHP2L1; SNU13	22		mRNA Processing			1	0	1.098	1.073	1.005	0.867628	0.998389	0.950105	36.94	26.22	29.42	104.3	96.2	99.5	17.91	50.79	18.91	66443491	4.29189e+07	4.70683e+07	59792757	16521986	3.98585e+07	5.51915e+07	42647052	37285482	2	2	2
NP_001655.1	transforming protein RhoA isoform 1 precursor [OS=Homo sapiens]	0	134.787	38	10	111	9	193	21.8	6.1	266	10	Pf00025, Pf00071, Pf08477	387	RHOA	3	ENSG00000067560.10	Androgen receptor signaling pathway; Physiological and Pathological Hypertrophy of the Heart; MicroRNAs in cardiomyocyte hypertrophy; Leptin signaling pathway; Pathogenic Escherichia coli infection; AGE/RAGE pathway; Corticotropin-releasing hormone signaling pathway; Spinal Cord Injury; Alpha 6 Beta 4 signaling pathway; Focal Adhesion; G Protein Signaling Pathways; Wnt Signaling Pathway Netpath; …	NOD-like receptor signaling pathway; Colorectal cancer; Leukocyte transendothelial migration; Endocytosis; Neurotrophin signaling pathway; mTOR signaling pathway; MicroRNAs in cancer; Wnt signaling pathway; Axon guidance; Tight junction; Tuberculosis; Bacterial invasion of epithelial cells; TGF-beta signaling pathway; Oxytocin signaling pathway; Regulation of actin cytoskeleton; cGMP-PKG signalin…	Rho GTPase cycle; Ovarian tumor domain proteases; G beta:gamma signalling through PI3Kgamma; RHO GTPases activate CIT; PCP/CE pathway; PI3K/AKT activation; SLIT2:ROBO1 increases RHOA activity; EPHA-mediated growth cone collapse; EPHB-mediated forward signaling; ERBB2 Regulates Cell Motility; Neutrophil degranulation; TGF-beta receptor signaling in EMT (epithelial to mesenchymal transition); Sema4…	111	1	0.881	1.011	1.151	0.311867	0.91118	0.727423	20.56	38.03	28.54	101.4	107.2	91.5	7.4	1.1	9.28	2.38173e+08	2.41042e+08	2.42834e+08	2.50253e+08	2.24184e+08	2.35772e+08	1.81248e+08	2.10904e+08	2.06609e+08	10	10	9
EAW80543.1	ubiquitin carboxyl-terminal esterase L3 (ubiquitin thiolesterase), isoform CRA_b [OS=Homo sapiens]	0	39.205	38	6	36	1	230	26.1	4.92	67.49	6	Pf01088	7347	UCHL3	13					0	0	1.869	2.079	1.114	0.000399674	0.00073046	0.839682	45.42	45.3	48.75	153.6	82.2	64.2	19.59	37.47	40.29	15100944	13625300	10151384	11321290	6.66435e+06	4.93747e+06	9948760	5.69882e+06	4.60459e+06	1	1	1
NP_005773.3	THO complex subunit 4 [OS=Homo sapiens]	0	58.876	38	5	53	1	264	27.5	11.05	179.05	5	Pf00076, Pf13893, Pf14259	10189	ALYREF	17	ENSG00000183684.7		RNA transport; Spliceosome; Herpes simplex infection; mRNA surveillance pathway		4	0	1.118	1.182	0.944	0.986795	0.968415	0.816087	56.17	14.53	23.33	116.4	90.3	93.3	41.38	22.51	6.64	470350	955734	1.07623e+06	679677	821820		807599	864841	755115	1	1	1
NP_004672.2	eukaryotic translation initiation factor 1A, Y-chromosomal isoform 1 [OS=Homo sapiens]	0	13.87	38	3	31	3	144	16.4	5.24	24.15	3	Pf01176	9086	EIF1AY	Y	ENSG00000198692.9	Translation Factors	RNA transport		2	0	0.831	1.033	1.285	0.502825	0.955036	0.300705	73.66	36.76	78.99	98.9	103.4	97.8	13.3	5.54	11.8	9.67713e+06	7.0036e+06	7.16279e+06	7.88434e+06	6.97818e+06	6.66574e+06	8.79078e+06	7.15618e+06	6.93568e+06	3	3	3
AAO18189.1	prothymosin alpha protein [OS=Homo sapiens]	0	52.202	38	6	113	6	110	12	3.8	221.67	6		5757	PTMA	2					0	0	1.449	1.207	0.83	0.000895335	0.793816	0.302228	60.82	57.46	44.67	102.9	83.5	113.6	3.8	4.54	26.2	8.59594e+07	6.96134e+07	7.95746e+07	6.80096e+07	5.60706e+07	5.77861e+07	9.02872e+07	8.35138e+07	5.19502e+07	5	6	5
BAD96777.1	ribosomal protein L4 variant, partial [OS=Homo sapiens]	0	205.527	38	18	157	2	427	47.7	11	446.78	18	Pf00573, Pf14374	6124	RPL4	15		Cytoplasmic Ribosomal Proteins			1	1	0.855	0.584	0.654	0.385254	0.002599	0.00322133	24.63	34.61	21.37	81.4	79.9	138.7	28.69	22.87	5.15	4.70127e+07	2.39958e+07	3.05139e+07	4.08095e+07	2.34724e+07	2.75197e+07	5.33692e+07	4.72068e+07	4.90276e+07	3	3	3
CAG38759.1	ANXA5 [OS=Homo sapiens]	0	107.224	38	13	121	13	320	35.9	5.05	250.85	13	Pf00191	308	ANXA5	4		Apoptosis-related network due to altered Notch3 in ovarian cancer; Prostaglandin Synthesis and Regulation			2	0	0.989	0.887	0.918	0.903538	0.585033	0.707718	29.27	23.46	29.85	94.3	100.3	105.4	8.62	5.71	9.74	1.11961e+08	1.12722e+08	1.24994e+08	1.18158e+08	1.15567e+08	1.19732e+08	1.12223e+08	1.31558e+08	1.29207e+08	12	13	13
XP_011533514.1	PREDICTED: ubiquitin carboxyl-terminal hydrolase isozyme L3 isoform X1 [OS=Homo sapiens]	0	53.017	38	7	46	2	294	33.2	6.47	116.35	7	Pf01088	7347	UCHL3	13					0	5	1.073	1.014	1.003	0.944055	0.91656	0.94838	19.09	15.73	20.69	112.6	97.9	89.5	5.03	11.28	9.85	4.1458e+07	3.35978e+07	35815054	3.76609e+07	2.76083e+07	2.86234e+07	3.0039e+07	2.75863e+07	2.40068e+07	5	6	5
AAF02218.1	proteasome activator PA28 beta [OS=Homo sapiens]	0	51.589	38	8	57	8	239	27.3	5.58	64.18	8	Pf02251, Pf02252	5721	PSME2	14		Proteasome Degradation			1	0	1.096	1.146	0.972	0.815044	0.89868	0.883272	16.28	24.68	27.12	87.7	80.8	131.5	2	3.47	4.2	1.24761e+08	1.13013e+08	1.19107e+08	1.15404e+08	9.53923e+07	1.00834e+08	1.73254e+08	169736616	1.56545e+08	7	7	7
BAG58215.1	unnamed protein product [OS=Homo sapiens]	0	111.329	38	15	86	15	415	45.3	9.03	191.21	15	Pf00266	29968	PSAT1	9		Trans-sulfuration and one carbon metabolism			1	0	0.728	0.818	1.126	0.00034121	0.328776	0.804764	27.61	35.53	34.3	81.2	105.7	113.1	15.08	22.94	8.18	1.21841e+08	8.2216e+07	9.05194e+07	1.65903e+08	97545230	1.08222e+08	1.38912e+08	1.17432e+08	1.18926e+08	15	14	13
NP_065174.1	Coronin-1B [OS=Homo sapiens]	0	81.159	38	15	63	15	489	54.2	5.88	95.09	15	Pf00400, Pf08953, Pf08954	57175	CORO1B	11	ENSG00000172725.13				0	0	1.048	1.046	1	0.966759	0.968604	0.943261	17.52	28.06	14.03	101.7	99.5	98.7	5.96	0.41	4.21	8.41415e+07	7.67971e+07	8.98261e+07	8.12271e+07	70980223	7.47253e+07	7.53985e+07	8.03915e+07	7.64438e+07	14	14	13
AAH51871.1	Chromosome 12 open reading frame 10 [OS=Homo sapiens]	0	85.741	38	9	53	9	376	42.5	6.84	155.03	9	Pf03690	60314	C12orf10	12					0	0	1.098	1.065	0.967	0.888058	0.989787	0.873716	14.7	26.98	21.47	89.6	81.1	129.3	20.59	5.26	13.89	2.70862e+07	16417523	1.88389e+07	1.68894e+07	1.36487e+07	1.59554e+07	2.63711e+07	3.25123e+07	2.55102e+07	7	7	7
NP_068733.1	Cofilin-2 isoform 1 [OS=Homo sapiens]	0	91.506	38	7	84	1	166	18.7	7.88	173.94	7	Pf00241	1073	CFL2	14	ENSG00000165410.14	Leptin signaling pathway; Regulation of Microtubule Cytoskeleton; Regulation of Actin Cytoskeleton; G13 Signaling Pathway	Axon guidance; Pertussis; Regulation of actin cytoskeleton; Fc gamma R-mediated phagocytosis		8	0
NP_057649.2	Cytochrome c oxidase assembly factor 4 homolog, mitochondrial [OS=Homo sapiens]	0	11.859	38	2	6	2	87	10.1	6.04	5.04	2	Pf06747	51287	COA4	11	ENSG00000181924.6			Mitochondrial protein import; Metabolism of proteins	2	0	0.903	0.785	0.968	0.855953	0.459995	0.853645	19.94	4.94	6.14	85	106.8	108.2	9.22	10.35	2.69	1.48733e+06	1.48977e+06	1.36666e+06	1.75759e+06	1558964	1.36259e+06	1.74349e+06	1.76177e+06	1.65757e+06	1	1	1
EAW89272.1	growth factor receptor-bound protein 2, isoform CRA_c [OS=Homo sapiens]	0	32.971	38	7	47	7	203	23.5	6.8	57.83	7	Pf00017, Pf00018, Pf07653, Pf14604	2885	GRB2	17		IL-5 Signaling Pathway; Integrin-mediated Cell Adhesion; Leptin signaling pathway; Prolactin Signaling Pathway; IL-9 Signaling Pathway; B Cell Receptor Signaling Pathway; TNF alpha Signaling Pathway; Interleukin-11 Signaling Pathway; Oncostatin M Signaling Pathway; Brain-Derived Neurotrophic Factor (BDNF) signaling pathway; IL-3 Signaling Pathway; Kit receptor signaling pathway; Focal Adhesion; S…			26	0	1.051	1.066	1.006	0.984053	0.992383	0.954316	17.29	34.59	23.47	108.2	98.1	93.7	1.2	4.57	7.24	4.38855e+07	3.86281e+07	4.26605e+07	3.95685e+07	3.16776e+07	3.49679e+07	3.21789e+07	3.45575e+07	3.61741e+07	7	7	7
NP_001348.2	Atp-dependent rna helicase a [OS=Homo sapiens]	0	336.581	38	38	254	38	1270	140.9	6.84	555.6	38	Pf00035, Pf00270, Pf00271, Pf04408, Pf07717	1660	DHX9	1	ENSG00000135829.16	mRNA Processing		TRAF6 mediated NF-kB activation; TAK1 activates NFkB by phosphorylation and activation of IKKs complex; RIP-mediated NFkB activation via ZBP1; Activated TLR4 signalling; Interleukin-1 family signaling; mRNA Splicing - Major Pathway; DEx/H-box helicases activate type I IFN and inflammatory cytokines production	34	0	1.091	1.153	1.064	0.831454	0.890905	0.94838	27.19	35.78	27.67	117.1	103.2	79.8	3.7	4.49	11.08	3.81909e+08	3.22113e+08	3.36729e+08	3.27437e+08	2.6809e+08	2.79474e+08	2.3141e+08	2.15949e+08	2.63755e+08	35	35	32
NP_006057.1	alcohol dehydrogenase [NADP(+)] [OS=Homo sapiens]	0	52.664	38	7	23	7	325	36.6	6.79	55.97	7	Pf00248	10327	AKR1A1	1	ENSG00000117448.13	Benzo(a)pyrene metabolism; Metapathway biotransformation	Glycerolipid metabolism; Pentose and glucuronate interconversions; Glycolysis / Gluconeogenesis; Metabolic pathways	Catabolism of glucuronate to xylulose-5-phosphate; Glutathione conjugation	12	0	0.906	0.853	0.941	0.654662	0.454237	0.793631	18.97	23.96	21.63	96.4	102	101.6	6.43	1.85	3.13	2.23547e+07	1.74081e+07	21197011	22892182	1.94253e+07	2.05949e+07	2.27141e+07	2.12391e+07	2.0836e+07	5	5	5
NP_008996.1	Hsp90 co-chaperone Cdc37 [OS=Homo sapiens]	0	84.66	38	10	57	10	378	44.4	5.25	102.94	10	Pf03234, Pf08564, Pf08565	11140	CDC37	19	ENSG00000105401.8	TNF alpha Signaling Pathway; Aryl Hydrocarbon Receptor; Aryl Hydrocarbon Receptor Pathway; Simplified Interaction Map Between LOXL4 and Oxidative Stress Pathway; Focal Adhesion-PI3K-Akt-mTOR-signaling pathway	PI3K-Akt signaling pathway	Downregulation of ERBB2 signaling; Constitutive Signaling by EGFRvIII; Constitutive Signaling by Ligand-Responsive EGFR Cancer Variants	17	0	0.983	1.072	1.179	0.881607	0.999611	0.652316	30.64	44.9	21.66	113.9	105.3	80.8	2.59	4.08	6.22	1.19632e+08	1.01577e+08	1.07873e+08	1.05043e+08	8.86788e+07	8.9785e+07	7.59757e+07	6.73114e+07	7.50791e+07	9	9	9
P05534.2	RecName: Full=HLA class I histocompatibility antigen, A-24 alpha chain; AltName: Full=Aw-24; AltName: Full=HLA class I histocompatibility antigen, A-9 alpha chain; AltName: Full=MHC class I antigen A*24; Flags: Precursor [OS=Homo sapiens]	0	130.913	38	10	77	1	365	40.7	6.34	210.9	10	Pf00129, Pf07654	3105	HLA-A	6		Proteasome Degradation; Allograft Rejection		Interferon alpha/beta signaling; ER-Phagosome pathway; Immunoregulatory interactions between a Lymphoid and a non-Lymphoid cell; Endosomal/Vacuolar pathway; Interferon gamma signaling; Antigen Presentation: Folding, assembly and peptide loading of class I MHC	14	8	0.556	0.778	1.589	4.788e-11	0.209816	0.00588845	28.15	49.81	39.33	77.1	134.5	88.4	16.29	12.07	19.4	6.99632e+07	5.10531e+07	4.80714e+07	1.1297e+08	8.41843e+07	8.32415e+07	8.04173e+07	6.05618e+07	5.4349e+07	8	8	8
NP_006344.1	High mobility group nucleosome-binding domain-containing protein 4 [OS=Homo sapiens]	0	82.918	38	3	37	3	90	9.5	10.48	135.35	3		10473	HMGN4	6	ENSG00000182952.4				0	0	0.805	1.016	1.164	0.0616411	0.91814	0.699039	58.73	51.55	30.99	103.8	133.6	62.6	15.95	26.5	31.43	4.39904e+07	5.30155e+07	5.19509e+07	4.82212e+07	7.29022e+07	6.14422e+07	3.03791e+07	29381009	4.88835e+07	2	3	3
BAD96692.1	Full-length cDNA 5-PRIME end of clone CS0DF013YM24 of Fetal brain of Homo sapiens (human) (Fragment) variant, partial [OS=Homo sapiens]	0	88.101	38	9	49	9	225	25.6	6.7	127.41	9	Pf01105	10972	TMED10	14		mRNA Processing			1	0	0.904	1.304	1.302	0.578803	0.562343	0.254881	24.49	35.67	24.4	107.4	119.2	73.3	16.25	6.52	19.94	5.50359e+07	3.83977e+07	3.85261e+07	5.01017e+07	4.02656e+07	4.09773e+07	2.76466e+07	2.73139e+07	1.86432e+07	7	8	7
Q86V81.3	RecName: Full=THO complex subunit 4; Short=Tho4; AltName: Full=Ally of AML-1 and LEF-1; AltName: Full=Aly/REF export factor; AltName: Full=Transcriptional coactivator Aly/REF; AltName: Full=bZIP-enhancing factor BEF [OS=Homo sapiens]	0	80.02	38	6	81	2	257	26.9	11.15	257.01	6	Pf00076, Pf13893, Pf14259	10189	ALYREF	17			Spliceosome; mRNA surveillance pathway; RNA transport; Herpes simplex infection	mRNA 3'-end processing; Transport of Mature mRNA Derived from an Intronless Transcript; mRNA Splicing - Major Pathway; Transport of the SLBP Dependant Mature mRNA; Cleavage of Growing Transcript in the Termination Region ; Transport of Mature mRNA derived from an Intron-Containing Transcript; Transport of the SLBP independent Mature mRNA	19	4	0.964	0.859	0.974	0.829034	0.472975	0.883272	11.52	25.92	22.94	97.7	100.9	101.4	1.97	4.33	0.65	1.06401e+08	9.54898e+07	1.04969e+08	1.03003e+08	9.83585e+07	9.85083e+07	1.03362e+08	1.0241e+08	1.01736e+08	5	5	5
NP_004757.1	Coatomer subunit beta' [OS=Homo sapiens]	0	115.947	38	19	63	19	906	102.4	5.27	158.12	19	Pf00400, Pf04053	9276	COPB2	3	ENSG00000184432.9			COPI-dependent Golgi-to-ER retrograde traffic; COPI-mediated anterograde transport	11	0	1.147	1.075	0.962	0.674959	0.996014	0.858553	27.24	33.95	24.62	116.5	97.2	86.3	6.65	3.53	9.51	6.96922e+07	5.40346e+07	6.60197e+07	5.1468e+07	4.81916e+07	5.05605e+07	4.74079e+07	4.58467e+07	5.37818e+07	18	16	18
AAA60053.1	Pyruvate dehydrogenase E1-beta subunit [OS=Homo sapiens]	0	52.743	38	10	49	10	359	39.2	6.65	95.25	10	Pf02779, Pf02780	5162	PDHB	3		Glycolysis and Gluconeogenesis			1	0	0.974	1.121	1.205	0.8735	0.939474	0.564669	32.35	26.95	27.7	106.5	115.7	77.7	8.34	3.94	18.8	2.90845e+07	2.57326e+07	3.20048e+07	3.01172e+07	2.59443e+07	2.95664e+07	1.73549e+07	2.44859e+07	1.9267e+07	9	9	9
AAP88736.1	MCM2 minichromosome maintenance deficient 2, mitotin (S. cerevisiae) [OS=Homo sapiens]	0	195.805	38	25	143	25	895	100.9	5.58	387.82	25	Pf00493, Pf01078, Pf07728, Pf12619, Pf14551	4171	MCM2	3		Cell Cycle; G1 to S cell cycle control; DNA Replication			3	0	1.102	1.187	1.093	0.785985	0.823082	0.88537	23.8	23.79	23.53	109.3	104.8	85.9	4.74	8.46	7.54	1.23322e+08	1.14598e+08	1.28604e+08	1.0204e+08	1.03876e+08	1.10153e+08	8.73285e+07	9.3119e+07	9.88218e+07	21	21	22
AAC78728.1	translation initiation factor eIF3 p44 subunit [OS=Homo sapiens]	0	73.625	38	8	58	8	320	35.7	6.43	156.02	8	Pf00076, Pf12353, Pf13893, Pf14259	8666	EIF3G	19		Translation Factors			1	0	1.26	1.296	1.141	0.232231	0.582172	0.764261	34.37	26.58	38.57	112.2	104.8	82.9	9.98	9.24	3.8	6.67406e+07	4.87101e+07	5.42201e+07	5.40085e+07	4.39848e+07	4.16103e+07	3.67909e+07	3.88285e+07	3.77806e+07	5	5	5
EAW64954.1	glutaminyl-tRNA synthetase, isoform CRA_b [OS=Homo sapiens]	0	119.478	37	20	96	20	793	89.6	7.34	200.98	20	Pf00749, Pf03950, Pf04557, Pf04558	5859	QARS	3					0	0	0.958	1.059	1.13	0.792331	0.984739	0.798516	32.04	28.49	29.06	109.4	111.1	79.5	11.47	9.6	17.17	7.7054e+07	8.40232e+07	8.77743e+07	7.56456e+07	7.73859e+07	8.43258e+07	5.03614e+07	6.05657e+07	6.94073e+07	21	21	21
AAH01052.1	RecQ protein-like (DNA helicase Q1-like) [OS=Homo sapiens]	0	173.759	37	19	117	19	649	73.4	8.07	274.84	19	Pf00270, Pf00271, Pf04851, Pf09382	5965	RECQL	12					0	0	0.966	0.979	1.074	0.830696	0.846908	0.924227	25.14	37.87	27.84	99.2	109.3	91.4	7.03	5.31	7.92	7.37359e+07	6.05322e+07	7.57025e+07	8.34199e+07	6.66461e+07	7.08631e+07	6.25496e+07	6.90535e+07	5.92197e+07	16	13	16
NP_803193.2	liprin-beta-1 isoform 2 [OS=Homo sapiens]	0	243.173	37	26	177	2	1011	114	5.55	410.97	26	Pf00536, Pf04111, Pf05483, Pf05911, Pf07647	8496	PPFIBP1	12					0	0	1.217	1.118	0.982	0.625733	0.943668	0.899483	27.96	19.55	24.35	105.5	93.1	101.4	9.66	29.53	10.33	13542186	1.42631e+07	1.37109e+07	7.48745e+06	1.05021e+07	1.2874e+07	1.10526e+07	1.25135e+07	1.32064e+07	2	2	2
NP_005313.1	Histone H1.5 [OS=Homo sapiens]	0	206.839	37	16	204	13	226	22.6	10.92	426.01	16	Pf00538	3009	HIST1H1B	6	ENSG00000184357.4			Formation of Senescence-Associated Heterochromatin Foci (SAHF); Activation of DNA fragmentation factor	10	0	0.99	1.037	0.995	0.90769	0.959211	0.931174	23.98	29.96	23.52	107	101.4	91.6	7.29	5.7	2.65	9.66116e+08	9.70128e+08	1.02739e+09	9.64407e+08	9.05168e+08	8.55255e+08	8.40937e+08	8.35203e+08	8.60706e+08	15	15	14
ABP48317.1	immunoglobulin lambda light chain variable region, partial [OS=Homo sapiens]	0.037	1.268	37	1	1	1	89	9.7	6.51	0	1									0	0	0.79	0.731	0.912	0.359189	0.107094	0.682696	14.45	17.17	9.08	82.1	103.9	114	17.78		8.65	4304016	5250674	4.48473e+06			5.21535e+06		5564547	6.24328e+06	1	1	1
XP_006715869.1	PREDICTED: septin-7 isoform X2 [OS=Homo sapiens]	0	116.312	37	13	80	12	448	52	8.73	190.57	13	Pf00735, Pf01926, Pf05368, Pf10211	989	SEPT7	7					0	1	1.022	1.003	0.989	0.995934	0.899069	0.916228	21.1	22.32	17.35	94.9	97.4	107.7	3.03	7	1.49	9.67516e+07	8.39367e+07	9.64456e+07	8.52995e+07	8.19067e+07	9.0946e+07	1.00717e+08	1.0144e+08	9.83285e+07	11	11	11
NP_004930.1	ATP-dependent RNA helicase DDX1 [OS=Homo sapiens]	0	190.147	37	18	109	18	740	82.4	7.23	310.35	18	Pf00270, Pf00271, Pf00622	1653	DDX1	2	ENSG00000079785.14	DDX1 as a regulatory component of the Drosha microprocessor; mRNA Processing		tRNA processing in the nucleus	5	0	1.112	1.189	1.054	0.744494	0.818325	0.967203	19.51	29	23.17	105.9	99.5	94.6	9.66	11.16	3.76	1.19092e+08	8.81403e+07	9.62487e+07	1.06468e+08	7.85181e+07	8.08287e+07	8.33234e+07	8.44893e+07	7.77923e+07	16	15	13
AAH87847.1	Unknown (protein for IMAGE:30389268), partial [OS=Homo sapiens]	0	120.829	37	13	84	2	465	50.4	7.85	230.31	13	Pf00009, Pf03144, Pf09173	255308	LOC255308	12					0	0	0.996	1.035	1.067	0.92923	0.956537	0.938386	10.56	18.94	14.17	102.2	100.4	97.3	5.38	7.59	18.98	2.47726e+07	2.10915e+07	2.11904e+07	2.43709e+07	1.95711e+07	1.94531e+07	2.2765e+07	2.07516e+07	1.51683e+07	3	3	3
AAH09744.1	CsdA protein [OS=Homo sapiens]	0	94.239	37	7	68	1	303	31.9	9.66	144.75	7	Pf00313	8531	CSDA; YBX3	12		RalA downstream regulated genes; Apoptosis-related network due to altered Notch3 in ovarian cancer			2	0	0.94	0.877	0.933	0.888058	0.728446	0.799982	50.15	78.79	83.44	93.6	99.6	106.8	66.36	69.36		498647	1.20514e+06		485426		1.3169e+06		853574		1	1
BAD92220.1	DEAD/H (Asp-Glu-Ala-Asp/His) box polypeptide 3 variant, partial [OS=Homo sapiens]	0	173.797	37	21	148	20	674	74.5	7.75	308.04	21	Pf00270, Pf00271, Pf04851	1654	DDX3X	X					0	0	1.118	1.271	1.099	0.710172	0.647414	0.883272	21.12	30.37	30.39	113.7	99	87.3	5.24	6.95	3.65	2.09233e+08	1.66105e+08	1.82838e+08	1.72956e+08	1.32586e+08	1.46351e+08	1.44227e+08	1.32234e+08	1.32464e+08	18	18	17
XP_016870502.1	PREDICTED: protein SET isoform X1 [OS=Homo sapiens]	0	130.882	37	12	135	12	309	35.8	4.45	336.69	12	Pf00956	6418	SET	9					0	0	1.065	1.129	1.156	0.89985	0.922527	0.719184	32.81	34.75	40.66	97.7	108.7	93.6	7.78	5.43	0.68	2.71833e+08	2.22706e+08	2.82506e+08	2.84175e+08	2.55565e+08	2.43276e+08	2.39571e+08	2.33789e+08	2.35196e+08	11	11	10
EAW62938.1	hCG24487, isoform CRA_a [OS=Homo sapiens]	0	147.632	37	12	102	12	282	32.2	9.95	236.38	12	Pf00237, Pf14975								0	0	1.005	0.985	0.934	0.954601	0.863163	0.764582	25.95	24.6	26.91	106.5	101.9	91.6	4.54	13.51	14.57	2.31022e+08	1.84236e+08	2.08952e+08	1.98091e+08	1.51454e+08	2.10023e+08	2.15192e+08	1.70676e+08	1.60075e+08	12	11	11
NP_001193469.1	F-actin-capping protein subunit beta isoform 2 [OS=Homo sapiens]	0	64.261	37	7	46	7	277	31.3	5.59	111.9	7	Pf01115	832	CAPZB	1	ENSG00000077549.17		Endocytosis	COPI-independent Golgi-to-ER retrograde traffic; COPI-mediated anterograde transport; MHC class II antigen presentation; HSP90 chaperone cycle for steroid hormone receptors (SHR); Factors involved in megakaryocyte development and platelet production	20	0	1.099	0.952	0.871	0.849924	0.79448	0.502331	22.5	12.45	23.6	105.2	97.4	97.5	6.82	11.95	2.8	6.37704e+07	6.29832e+07	6.81193e+07	6.24754e+07	6.65222e+07	5.71821e+07	5.84365e+07	6.02793e+07	5.95462e+07	7	7	7
BAG57019.1	unnamed protein product [OS=Homo sapiens]	0	196.281	37	20	103	10	701	75.2	8.88	287.27	20	Pf00441, Pf02770, Pf02771, Pf08028								0	10	1.149	1.266	1.145	0.563827	0.65844	0.748554	26.83	30.05	29.24	114.5	97.2	88.4	2.92	10.43	4.13	1.96428e+08	1.66178e+08	1.91616e+08	1.85113e+08	1.37542e+08	1.42723e+08	1.39619e+08	1.41178e+08	1.29075e+08	20	19	20
NP_004271.1	eukaryotic translation elongation factor 1 epsilon-1 isoform 1 [OS=Homo sapiens]	0	28.812	37	4	27	4	174	19.8	8.54	64.33	4	Pf00043, Pf13410, Pf14497	9521	EEF1E1	6	ENSG00000124802.11			Cytosolic tRNA aminoacylation; SeMet incorporation into proteins	8	0	0.82	0.847	1.05	0.46585	0.431767	0.97383	26.75	31.78	22.66	108.3	95.4	96.2	6.55	26.59	13.07	7.8988e+06	7.73271e+06	8.43139e+06	1.09193e+07	6.00249e+06	6.80337e+06	8.69694e+06	7.0982e+06	6.61868e+06	3	4	3
NP_689478.1	Transcription factor BTF3 homolog 4 isoform 1 [OS=Homo sapiens]	0	22.002	37	2	6	2	158	17.3	6.35	29.83	2	Pf01849	91408	BTF3L4	1	ENSG00000134717.17				0	0	0.803	0.859	1.072	0.364152	0.473434	0.930033	10.06	9.75	17.24	88	109.6	102.4	3.83	12.65	18.24	5083854	4.77538e+06	4.92043e+06	5040933	5683777	5.62865e+06	5552232	5.79939e+06	4011566	1	1	1
EAX07709.1	DnaJ (Hsp40) homolog, subfamily C, member 8, isoform CRA_c [OS=Homo sapiens]	0	50.5	37	8	31	8	278	32.6	8.98	56.45	8	Pf00226	22826	DNAJC8	1		mRNA Processing			1	0	1.14	1.175	1.012	0.811295	0.844928	0.967765	35.99	38.77	19.04	102.9	96.1	101	9.76	7.18	4.48	2.68919e+07	2.85103e+07	2.78872e+07	25488975	2.53905e+07	2.39136e+07	2.48716e+07	2.60028e+07	2.63984e+07	7	8	8
NP_001656.2	Rho-related GTP-binding protein RhoG precursor [OS=Homo sapiens]	0	34.73	37	4	26	3	191	21.3	8.12	78.84	4	Pf00025, Pf00071, Pf04670, Pf08477	391	RHOG	11	ENSG00000177105.9	Brain-Derived Neurotrophic Factor (BDNF) signaling pathway	Shigellosis; Bacterial invasion of epithelial cells; Salmonella infection	G alpha (12/13) signalling events; Neutrophil degranulation; RHO GTPases activate KTN1; GPVI-mediated activation cascade; Sema4D induced cell migration and growth-cone collapse; Rho GTPase cycle	23	0	1.008	1.051	1.014	0.966759	0.972839	0.973612	22.19	21.94	19.1	101.6	103.6	94.9	7.45	30.78	7.5	8.8244e+06	7.41303e+06	7.23891e+06	4.54254e+06	7.39703e+06	7.54823e+06	6.86038e+06	7.15293e+06	7742222	3	3	3
AAH00934.1	Eukaryotic translation initiation factor 2, subunit 2 beta, 38kDa [OS=Homo sapiens]	0	98.563	37	11	54	11	333	38.4	5.8	91.36	11	Pf01873, Pf04147	8894	EIF2S2	20		Translation Factors; Brain-Derived Neurotrophic Factor (BDNF) signaling pathway			2	0	1.024	1.012	0.934	0.994452	0.912841	0.764177	36.3	37.49	30.2	88.5	100	111.6	12.99	2.79	8.76	7.39945e+07	5.9579e+07	5.41455e+07	7.11305e+07	6.3605e+07	6.96942e+07	8.33999e+07	6.87153e+07	7.70908e+07	10	8	9
AAA58661.1	vacuolar H+-ATPase 56,000 subunit [OS=Homo sapiens]	0	125.851	37	16	87	16	511	56.5	5.81	199.35	16	Pf00006, Pf00306, Pf02874	526	ATP6V1B2	8					0	0	1.036	1.092	1.066	0.997968	0.974264	0.943261	21.55	24.68	15.18	82.9	91.7	125.4	22	10.99	1.83	7.80073e+07	5.34154e+07	4.78686e+07	6.26309e+07	5.58047e+07	7.0425e+07	8.45648e+07	8.34513e+07	8.5158e+07	13	13	11
BAG35595.1	unnamed protein product [OS=Homo sapiens]	0	60.538	37	7	20	7	227	26.2	8.82	48.14	7	Pf13869	11051	NUDT21	16		mRNA Processing			1	0	1.026	1.065	0.995	0.986795	0.989141	0.931583	32.58	33.92	34.83	109.6	92.4	98	25.29	12.54	4.05	2.92166e+07	1.53879e+07	2.61874e+07	2.61698e+07	1.81734e+07	2.02736e+07	2.26124e+07	2.22597e+07	2.36286e+07	7	6	7
NP_001026854.1	serine/arginine-rich splicing factor 7 isoform 1 [OS=Homo sapiens]	0	85.048	37	8	76	8	238	27.4	11.82	161.98	8	Pf00076, Pf13893, Pf14259	6432	SRSF7	2	ENSG00000115875.18	mRNA Processing	Herpes simplex infection; Spliceosome	Cleavage of Growing Transcript in the Termination Region ; Transport of Mature mRNA derived from an Intron-Containing Transcript; mRNA 3'-end processing; mRNA Splicing - Major Pathway; mRNA Splicing - Minor Pathway	15	0	1.006	1.001	1.012	0.959201	0.897068	0.96855	25.32	26	27.77	100	102.2	97.8	12.9	1.13	6.21	142565231	1.00534e+08	1.40031e+08	1.39063e+08	1.20077e+08	1.26188e+08	1.28272e+08	1.24202e+08	1.37811e+08	8	7	8
AAH20803.1	developmentally regulated GTP binding protein 1 [OS=Homo sapiens]	0	53.96	37	9	31	9	367	40.5	8.9	74.24	9	Pf00009, Pf01926, Pf02421, Pf02824	4733	DRG1	22					0	0	1.035	0.865	0.954	0.997968	0.497595	0.834822	37.19	38.32	16.88	94.3	95.6	110.1	21.12	3.79	15.16	3.27666e+07	2.02733e+07	2.18796e+07	2.21463e+07	1.83124e+07	2.08079e+07	2.18289e+07	2.89088e+07	2.4284e+07	8	6	6
NP_001349.2	Pre-mRNA-splicing factor ATP-dependent RNA helicase DHX15 [OS=Homo sapiens]	0	139.894	36	24	87	23	795	90.9	7.46	164.24	24	Pf00270, Pf00271, Pf04408, Pf07717, Pf13401	1665	DHX15	4	ENSG00000109606.12	mRNA Processing	Spliceosome	mRNA Splicing - Major Pathway	6	1	0.941	0.874	0.942	0.704126	0.535131	0.795016	32.62	30.89	18.3	67.1	108.5	124.4	26.28	15.9	9.19	1.16765e+08	6.98636e+07	6.90406e+07	1.21734e+08	1.17207e+08	8.99819e+07	1.36698e+08	1.18061e+08	1.40691e+08	20	18	17
ACO44579.1	MHC class I antigen, partial [OS=Homo sapiens]	0	45.839	36	8	37	0	181	21	6.4	73.85	8	Pf00129								0	0
EAW61131.1	drebrin-like, isoform CRA_c [OS=Homo sapiens]	0	107.012	36	13	73	1	491	54.5	5.29	182.93	13	Pf00018, Pf00241, Pf07653, Pf14604	28988	DBNL	7		T-Cell antigen Receptor (TCR) Signaling Pathway			1	0	0.19	0.01	0.055	2.59259e-05	1.62313e-16	1.7785e-16	0	53.7	53.7	2.9	15.5	281.6			36.97	45754.8					210530	2524816	5386449	3.92523e+06	1
AAD09340.1	NAD+-specific isocitrate dehydrogenase beta subunit isoform B [OS=Homo sapiens]	0	44.601	36	7	29	7	387	42.4	8.46	65.69	7	Pf00180								0	0	1.042	1.213	1.18	0.99773	0.779712	0.648471	34.7	39.96	35.72	112.2	107.4	80.4	1.31	16.21	12.58	1.33421e+07	1.15049e+07	1.23403e+07	1.44729e+07	9.25787e+06	1.10096e+07	1.03908e+07	8.5222e+06	7.98727e+06	6	7	7
AAA66064.1	Sorbitol dehydrogenase [OS=Homo sapiens]	0	90.713	36	9	39	9	357	38.3	7.97	133.77	9	Pf00107, Pf08240, Pf12847	6652	SORD	15					0	0	1.091	1.707	1.518	0.908024	0.0366891	0.0171281	38.14	78.86	90.73	120.9	108.8	70.3	14.97	25.37	18.71	2.37699e+07	1.69966e+07	1.697e+07	2.18015e+07	1.44522e+07	1.22225e+07	1.04281e+07	7.88715e+06	1.14529e+07	7	7	7
XP_016874205.1	PREDICTED: prostaglandin E synthase 3 isoform X1 [OS=Homo sapiens]	0	116.367	36	7	163	7	165	19.4	4.97	422.25	7	Pf04969	10728	PTGES3	12					0	0	0.984	1.043	0.987	0.882992	0.967473	0.912404	30.82	30.82	28.01	101.6	98.6	99.8	6.79	3.24	3.29	2.23923e+08	1.72829e+08	2.11256e+08	2.11061e+08	1.73598e+08	1.88367e+08	1.958e+08	1.97347e+08	2.03362e+08	7	7	7
AAH14546.1	ARP2 actin-related protein 2 homolog (Yeast) [OS=Homo sapiens]	0	102.078	36	13	73	1	394	44.7	6.74	170.34	13	Pf00022	10097	ACTR2	2					0	0	1.246	0.879	0.701	0.684423	0.549729	0.0164302	6.36	19.83	5.3	101.7	81.7	116.6	11.7		19.18	5676156	5.96386e+06	6764519		4523181		5152214	7.06369e+06	7262700	1	1	1
BAG35117.1	unnamed protein product [OS=Homo sapiens]	0	37.096	36	4	46	2	105	11.7	7.18	82.46	4	Pf00036, Pf01023, Pf13499	6282	S100A11	1					0	0	0.875	1.048	0.977	0.270493	0.970553	0.890209	15.9	60.13	29.5	111.5	94.6	93.9	4.53	24.31	11.5	193426936	1.56358e+08	184577992	2.15107e+08	1.20138e+08	1.4312e+08	1.72432e+08	146901472	1.33946e+08	2	2	2
AAX94767.1	MHC class I antigen [OS=Homo sapiens]	0	99.455	36	8	39	1	365	41	6.95	114.78	8	Pf00129, Pf07654	3105	HLA-A	6		Proteasome Degradation; Allograft Rejection			2	4	0.709	1.012	1.522	0.00196969	0.91118	0.0161537	31.93	22.43	33.71	87.6	119.4	93	2.5	22.36	16.03	4.34583e+07	37410581	42703082	7.92184e+07	4.73713e+07	5.16865e+07	5.01482e+07	3.56603e+07	4.1337e+07	3	2	2
BAD97000.1	acidic (leucine-rich) nuclear phosphoprotein 32 family, member A variant, partial [OS=Homo sapiens]	0	134.29	36	9	87	6	249	28.5	4.09	238.63	9	Pf12799, Pf13855, Pf14580	8125	ANP32A	15					0	3	1.238	1.213	1.034	0.174637	0.780636	0.997961	36.48	35.72	25.67	105.3	97.8	96.9	11.15	11.04	6.04	1.06505e+08	7.76578e+07	8.32417e+07	9.29935e+07	6.81294e+07	7.1239e+07	8.13621e+07	7.39028e+07	7.03289e+07	9	9	9
AAH07705.1	serine peptidase inhibitor, Kunitz type, 2 [OS=Homo sapiens]	0	40.419	36	7	34	7	252	28.2	8.29	66.03	7	Pf00014, Pf04306	10653	SPINT2	19					0	0	0.267	0.856	2.917	2.97569e-16	0.464684	1.87515e-14	31.45	31.94	31.74	47.1	192.6	60.3	20.49	9.76	19.75	2.62498e+07	16328597	1.77832e+07	8.33658e+07	6.32047e+07	6.45967e+07	30466210	21426594	21502146	6	4	6
AAH62437.1	cytochrome c oxidase subunit IV isoform 1 [OS=Homo sapiens]	0	37.446	36	7	42	7	169	19.6	9.51	60.98	7	Pf02936	1327	COX4I1	16		Electron Transport Chain			1	0	1.086	1.316	1.194	0.858713	0.529747	0.600424	24.3	29.55	24.88	117.2	100.8	82	10.15	10.42	15.89	1.0474e+08	8.36157e+07	8.10955e+07	88271003	6.79381e+07	6.68316e+07	5.41854e+07	7.26349e+07	6.00406e+07	7	7	7
CAB51168.1	Dyskerin [OS=Homo sapiens]	0	111.67	36	15	71	15	524	58.7	9.42	120.49	15	Pf01472, Pf01509, Pf08068	1736	DKC1	X					0	0	1.099	1.178	1.056	0.855953	0.838735	0.962089	26.79	39.99	40.66	110.1	97.6	92.3	20.05	14.34	13.14	6.97116e+07	4.70289e+07	4.51031e+07	5.44607e+07	3.6361e+07	4.16784e+07	4.84536e+07	3.6647e+07	4.04592e+07	14	14	14
NP_003124.1	signal recognition particle 9 kDa protein isoform 2 [OS=Homo sapiens]	0	33.557	36	3	15	3	86	10.1	7.97	47.58	3	Pf05486	6726; 653226	SRP9; SRP9P1	1; 10	ENSG00000143742.12		Protein export	SRP-dependent cotranslational protein targeting to membrane	4	0	0.994	1.084	1.032	0.921284	0.985514	0.998323	10.7	10.05	9.05	103.5	100.4	96.1	1.13	2.16	4.34	2.00256e+07	17145589	1.90186e+07	18530184	1.55748e+07	16940812	1.64929e+07	1.76206e+07	1.66581e+07	3	3	3
AAH02360.1	Elongation factor Tu GTP binding domain containing 2 [OS=Homo sapiens]	0	160.181	36	22	110	20	972	109.4	5	250.09	22	Pf00009, Pf00679, Pf03144, Pf03764, Pf14492	9343	EFTUD2	17		mRNA Processing			1	0	1.003	1.025	1.004	0.951115	0.939474	0.948564	20.9	33.41	31.94	74.7	110	115.4	10.62	3.27	5.86	1.29038e+08	9.24124e+07	1.05071e+08	1.60548e+08	1.34425e+08	1.39881e+08	1.64051e+08	1.43084e+08	1.53127e+08	19	18	18
EAW61129.1	drebrin-like, isoform CRA_a [OS=Homo sapiens]	0	113.964	36	13	79	1	500	55.3	5.29	197.46	13	Pf00018, Pf00241, Pf07653, Pf14604	28988	DBNL	7		T-Cell antigen Receptor (TCR) Signaling Pathway			1	11	0.984	0.88	0.941	0.903338	0.557394	0.789658	25.34	36.35	24.11	77	93.9	129.1	15.79	16.3	3.73	4.75739e+07	3.17012e+07	4.66695e+07	4.99674e+07	4.78259e+07	6.30682e+07	7.06969e+07	7.46567e+07	7.14503e+07	10	10	8
NP_115865.1	28S ribosomal protein S6, mitochondrial [OS=Homo sapiens]	0	22.413	36	3	17	3	125	14.2	9.26	31.27	3	Pf01250	64968	MRPS6	21	ENSG00000243927.5		Ribosome	Mitochondrial translation initiation; Mitochondrial translation elongation; Mitochondrial translation termination	7	0	0.891	1.697	1.823	0.686815	0.0402418	0.000107124	15.4	39.94	36.89	115.1	128.6	56.3	13.3	10.15	10.76	1.27854e+07	9.2093e+06	9.48829e+06	1.21738e+07	9.71844e+06	9.20818e+06	4.74613e+06	4.40365e+06	5.36027e+06	3	3	3
AAH00401.2	SF3B2 protein, partial [OS=Homo sapiens]	0	187.317	36	21	121	21	894	100	5.67	275.46	21	Pf02037, Pf04037, Pf04046	10992	SF3B2	11		mRNA Processing			1	0	1.14	1.249	1.069	0.604515	0.702553	0.934892	23.27	34.91	27.98	115.8	98	86.2	7.47	3.42	2.65	1.42935e+08	1.07523e+08	1.28778e+08	1.07855e+08	9.93287e+07	9.84088e+07	9.36021e+07	8.73148e+07	9.04115e+07	20	17	19
NP_620175.1	HIG1 domain family member 2A, mitochondrial [OS=Homo sapiens]	0.043	1.171	36	1	1	1	106	11.5	10.2	0	1	Pf04588	192286	HIGD2A	5	ENSG00000146066.2				0	0
NP_001670.1	sodium/potassium-transporting ATPase subunit beta-3 [OS=Homo sapiens]	0	70.338	36	7	54	7	279	31.5	8.35	116.21	7	Pf00287	483	ATP1B3	3	ENSG00000069849.10	Calcium Regulation in the Cardiac Cell	Protein digestion and absorption; Cardiac muscle contraction; Aldosterone-regulated sodium reabsorption; Thyroid hormone signaling pathway; cGMP-PKG signaling pathway; Gastric acid secretion; Thyroid hormone synthesis; cAMP signaling pathway; Insulin secretion; Salivary secretion; Proximal tubule bicarbonate reclamation; Carbohydrate digestion and absorption; Endocrine and other factor-regulated …	Ion homeostasis; Basigin interactions; Ion transport by P-type ATPases	27	0	1.076	1.24	1.109	0.870048	0.722307	0.857223	21.37	35.36	35.37	107.5	104.2	88.3	8.76	4.77	2.83	1.0833e+08	8.50409e+07	8.65851e+07	9.48203e+07	7.58591e+07	8.23848e+07	7.66009e+07	7.10932e+07	7.16407e+07	7	7	7
P29034.3	RecName: Full=Protein S100-A2; AltName: Full=CAN19; AltName: Full=Protein S-100L; AltName: Full=S100 calcium-binding protein A2 [OS=Homo sapiens]	0	51.178	36	5	43	5	98	11.1	4.78	87.56	5	Pf01023, Pf13499	6273	S100A2	1					0	0	1.008	1.052	0.923	0.966759	0.973451	0.72241	56.69	32.11	37.55	52.6	77.7	169.7	8.93	46.34	12.73	8.94537e+07	6.53303e+07	7.74019e+07	6.81266e+07	9.92568e+07	1.65745e+08	2.87823e+08	2.21531e+08	2.35404e+08	5	5	5
AAH00508.1	proteasome (prosome, macropain) subunit, beta type, 1 [OS=Homo sapiens]	0	63.473	36	5	53	5	241	26.4	8.13	166.04	5	Pf00227	5689	PSMB1	6		Proteasome Degradation			1	0	0.939	1.004	1.131	0.694818	0.902296	0.795334	14.09	19.01	26.29	104.5	104.4	91.1	3.05	8.69	6.33	2.79117e+08	257395876	2.79099e+08	2.76199e+08	2.52318e+08	2.25139e+08	2.46109e+08	2.31339e+08	2.11155e+08	5	5	5
AAC09385.1	eukaryotic translation elongation factor 1 alpha 1-like 14 [OS=Homo sapiens]	0	157.564	36	17	331	10	398	42.8	8.34	518.44	17	Pf00009, Pf03143, Pf03144								0	3	0.987	0.937	1.04	0.895962	0.753401	0.988609	33.54	49.27	36.94	84.4	103.5	112.1	4.03	6.67	8.5	8.8466e+08	7.5016e+08	8.8317e+08	1.06662e+09	8.19439e+08	9.46642e+08	1.24615e+09	1.05993e+09	1.04763e+09	9	11	10
NP_116126.3	Lamin-B2 [OS=Homo sapiens]	0	121.606	36	20	113	16	620	69.9	5.59	150.8	20	Pf00038, Pf00932, Pf01576, Pf12128	84823	LMNB2	19	ENSG00000176619.12	Gastric cancer network 2; Fas Ligand (FasL) pathway and Stress induction of Heat Shock Proteins (HSP) regulation	Apoptosis		3	0	0.967	0.933	0.988	0.839068	0.742092	0.913684	23.2	24.4	17.83	100.8	98.2	101.1	2.89	2.67	10.3	1.31053e+08	1.08872e+08	1.18415e+08	116609111	1.00193e+08	1.02568e+08	1.19312e+08	1.12863e+08	9.5149e+07	16	16	16
EAW78207.1	splicing factor, arginine/serine-rich 10 (transformer 2 homolog, Drosophila), isoform CRA_c, partial [OS=Homo sapiens]	0	58.194	36	8	39	8	289	33.7	11.25	78.12	8	Pf00076, Pf08777, Pf13893, Pf14259	6434	TRA2B	3		mRNA Processing			1	0	0.987	0.784	0.789	0.888058	0.224776	0.155971	31.94	45.83	27.29	99.2	88.8	112	9.77	9.63	11.3	5.03163e+07	3.74018e+07	4.03463e+07	4.22735e+07	3.1396e+07	3.34462e+07	4.87229e+07	4.36581e+07	3.77587e+07	6	6	6
AFR31791.1	eukaryotic translation initiation factor 3 [OS=Homo sapiens]	0	270.056	36	40	222	40	1382	166.4	6.79	444.9	40	Pf01399	8661	EIF3A	10		Translation Factors			1	0	1.047	1.053	1.018	0.956569	0.975509	0.977951	24.66	33.47	31.01	102.7	101.6	95.8	3.54	9.6	12.19	3.14477e+08	2.5602e+08	2.91904e+08	2.8601e+08	2.86063e+08	2.51887e+08	3.16105e+08	2.4764e+08	2.56807e+08	36	33	35
AAG02009.1	similar to Homo sapiens Hpast (HPAST) mRNA with GenBank Accession Number AF001434.1 [OS=Homo sapiens]	0	81.108	36	12	53	9	534	60.4	6.61	112.3	12	Pf00350, Pf01926, Pf12763	10938	EHD1	11		Insulin Signaling			1	3	1.036	1.29	1.244	0.99773	0.595507	0.432406	21.99	29.33	32.57	109.5	103.3	87.2	9.69	12.3	16.82	3.0944e+07	2.8606e+07	3.53981e+07	2.41568e+07	2.55052e+07	2.85602e+07	1.83593e+07	2.5098e+07	2.33823e+07	11	11	11
BAC11526.1	unnamed protein product [OS=Homo sapiens]	0	118.155	35	13	91	13	432	47.6	5.97	225.44	13	Pf00085, Pf13098, Pf13905	81567	TXNDC5	6					0	0	1.021	1.168	1.074	0.995115	0.859951	0.924615	18.5	41.07	29.99	112.6	100.9	86.6	4.85	3.49	6.14	1.23864e+08	1.12949e+08	1.29536e+08	1.15642e+08	9.55828e+07	1.00972e+08	9.60562e+07	8.97484e+07	8.266e+07	12	12	12
BAG61806.1	unnamed protein product [OS=Homo sapiens]	0	63.239	35	4	27	1	212	23.9	8.51	94.06	4	Pf00179	7332	UBE2L3	22		Parkin-Ubiquitin Proteasomal System pathway; Parkinsons Disease Pathway			2	0	3.416	2.166	0.914	0.000159361	0.0801373	0.74784	101.34	31.04	76.48	165.8	52.7	81.5	16.57	88.14	45.97	2.43942e+06	1.68386e+06	1.70375e+06	277441	1.0484e+06		873010	1.01599e+06	357391	1	1	1
CAA05770.1	Xeroderma Pigmentosum Group E Complementing protein [OS=Homo sapiens]	0	207.918	35	29	149	6	1140	126.8	5.26	295.48	29	Pf03178, Pf10433	1642	DDB1	11					0	21	1.073	1.098	1	0.881607	0.968604	0.941488	24.51	29.6	22.92	108.1	97.8	94.1	2.39	5.42	1.97	1.69255e+08	141149353	1.55324e+08	1.49031e+08	1.17519e+08	1.29146e+08	1.28862e+08	1.31347e+08	1.27563e+08	27	26	27
EAW95067.1	ribosomal protein L11, isoform CRA_a [OS=Homo sapiens]	0	53.281	35	5	68	2	133	15.1	8.87	173.14	5	Pf00281, Pf00673	6135	RPL11	1		Cytoplasmic Ribosomal Proteins			1	0	1.021	1.293	1.354	0.986795	0.590745	0.150432	24.76	59.07	43.05	104.4	108.1	87.4	2.87	9.79	7.76	6.73988e+07	6.1966e+07	6.43378e+07	6.59983e+07	5.81523e+07	5.15132e+07	5.81644e+07	4.91541e+07	5.08224e+07	3	3	3
EAW83322.1	hCG2013819 [OS=Homo sapiens]	0	37.285	35	4	70	2	102	11.3	8.81	156.17	4	Pf01023	729659	S100A11P1	7					0	2	0.792	0.435	0.421	0.0150592	9.97611e-07	6.99771e-11	67.9	148	128.68	60.1	77.1	162.8	14.48	7.06	47.59	1.19939e+08	1.00868e+08	1.42141e+08	1.36518e+08	1.37703e+08	1.34225e+08	1.47095e+08	4.13685e+08	2.91159e+08	3	4	2
BAF84522.1	unnamed protein product [OS=Homo sapiens]	0	48.653	35	6	27	6	315	35.1	6.83	66.69	6	Pf08925	28970	C11orf54	11					0	0	1.039	1.333	1.044	0.99773	0.484272	0.981047	38.51	48.85	59.61	107.3	102.9	89.8	3.9	22.81	3.08	1.54586e+07	1.34424e+07	1.3682e+07	1.80152e+07	1.21751e+07	1.06621e+07	1.1869e+07	1.19346e+07	1.11401e+07	6	6	6
EAW50259.1	hCG1994130, isoform CRA_d [OS=Homo sapiens]	0	83.337	35	11	87	3	296	33.9	9.55	157.65	11	Pf00410, Pf02453								0	8	1.019	1.065	1.031	0.993345	0.99117	0.997919	31.52	28.1	22.14	104.3	100.4	95.2	6.38	6.41	4.65	263019535	2.09509e+08	2.21381e+08	2.38862e+08	1.85883e+08	2.01472e+08	1.92767e+08	207301326	1.9617e+08	10	10	10
BAA04747.1	estrogen responsive finger protein [OS=Homo sapiens]	0	83.791	35	15	50	15	630	70.9	8.09	79.21	15	Pf00097, Pf00622, Pf01576, Pf13445, Pf13639, Pf13765, Pf13920, Pf13923, Pf14634, Pf15227	7706	TRIM25	17					0	0	0.918	1.038	1.128	0.653194	0.962109	0.801958	23.26	29.3	28.46	99	109.6	91.4	7.57	3.95	13.74	3.66948e+07	3.00249e+07	3.79508e+07	3.57573e+07	3.37088e+07	3.54251e+07	3.68778e+07	2.76346e+07	3.03489e+07	13	11	13
AAH49220.1	SLC9A3R1 protein, partial [OS=Homo sapiens]	0	50.154	35	9	35	9	428	45.8	7.18	68.37	9	Pf00595, Pf09007, Pf13180	9368	SLC9A3R1	17					0	0	1.27	1.511	1.179	0.24115	0.163718	0.651958	15.95	22.48	17.48	124.3	94.3	81.4	3.31	3.44	1.53	5.37366e+07	4.83011e+07	4.91707e+07	3.83199e+07	3.50498e+07	3.46317e+07	3.24866e+07	3.09574e+07	3.15109e+07	9	9	9
NP_006734.1	RNA-binding protein 3 [OS=Homo sapiens]	0	45.962	35	4	47	4	157	17.2	8.91	87.6	4	Pf00076, Pf13893, Pf14259	5935	RBM3	X	ENSG00000102317.17				0	0	1.262	1.575	1.233	0.180798	0.104513	0.468635	24.53	41.59	16.83	125.3	97.3	77.4	14.24	10.57	8.41	6.30365e+07	6.8397e+07	7.9366e+07	5.11574e+07	5.54696e+07	5.30503e+07	4.72111e+07	3.91219e+07	4.33226e+07	4	4	4
BAG36536.1	unnamed protein product [OS=Homo sapiens]	0	35.389	35	6	17	1	357	39.2	8.41	46.92	6	Pf00400	9410	SNRNP40	1		mRNA Processing			1	0	1.391	1.016	0.963	0.523276	0.91118	0.853055	5.39	8.14	47.27	111	79.8	109.2	0.82	21.34	26.69	3.98933e+06	3.42612e+06	3.76279e+06	3737599	2.26678e+06	2.48425e+06	3.59094e+06	3723780	2164479	1	1	1
AAH08751.1	calpain 1, (mu/I) large subunit [OS=Homo sapiens]	0	157.745	35	21	109	21	714	81.8	5.6	268.56	21	Pf00648, Pf01067, Pf13833	823	CAPN1	11		Integrin-mediated Cell Adhesion; Focal Adhesion			2	0	1.081	0.966	0.882	0.859156	0.817089	0.550913	24.66	33.88	24.4	95.7	96.3	108	1.71	6.15	7.01	1.40697e+08	1.22403e+08	1.37319e+08	1.33155e+08	1.08976e+08	1.30359e+08	1.29535e+08	1.44066e+08	1.42285e+08	19	19	19
AAD23914.1	ubiquitin-like protein activating enzyme [OS=Homo sapiens]	0	185.933	35	14	104	14	640	71.2	5.33	301.67	14	Pf00899, Pf02134, Pf10585, Pf14732	10054	UBA2	19					0	0	1.007	1.102	1.062	0.964658	0.967473	0.94838	24.92	34.84	25.68	106.8	103.6	89.5	2.14	3.46	6.41	1.40391e+08	1.19619e+08	1.35761e+08	1.28255e+08	1.12297e+08	1.11873e+08	1.18535e+08	1.06107e+08	1.02078e+08	14	14	13
CAL03468.1	immunoglobulin heavy chain variable region, partial [OS=Homo sapiens]	0.039	1.229	35	1	1	1	100	10.8	8.91	0	1	Pf07686								0	0
AAQ13428.1	citrate synthase [OS=Homo sapiens]	0	67.457	35	14	66	14	466	51.7	8.32	82.37	14	Pf00285	1431	CS	12		TCA Cycle			1	0	1.097	1.287	1.175	0.807142	0.604298	0.665704	22.43	16.89	13.29	111.5	103.6	84.9	3.08	6.9	0.66	2.31842e+08	1.9465e+08	2.07198e+08	2.12729e+08	1.70907e+08	1.72424e+08	1.56414e+08	1.54847e+08	1.5182e+08	14	14	14
BAF83616.1	unnamed protein product [OS=Homo sapiens]	0	85.979	35	12	29	12	635	72	8.25	62.34	12	Pf00017, Pf00069, Pf07714	6850	SYK	9		IL-5 Signaling Pathway; RANKL/RANK (Receptor activator of NFKB (ligand)) Signaling Pathway; B Cell Receptor Signaling Pathway; IL-3 Signaling Pathway; IL-2 Signaling Pathway			5	0	1.211	1.221	1.058	0.667685	0.76412	0.957462	70.64	84.19	82.68	131.9	89.4	78.7	53.14	83.6	86.65	3.23914e+07	1.16644e+07	1.37679e+07	2.87462e+07	5.32776e+06	8.57066e+06	2.83683e+07	7.81169e+06	6.08414e+06	11	8	7
AAB42010.1	Prt1 homolog [OS=Homo sapiens]	0	190.009	35	25	165	25	873	98.8	5.08	345.75	25	Pf00076, Pf08662, Pf13893, Pf14259	8662	EIF3B	7		Translation Factors			1	0	1.014	1.022	1.01	0.983571	0.933651	0.963395	18.89	30.8	25.08	104.8	101.4	93.7	1.75	4.96	5.09	1.64111e+08	1.40792e+08	1.58586e+08	1.62269e+08	1.30584e+08	1.38447e+08	1.46399e+08	1.30811e+08	1.31406e+08	21	23	22
NP_001129607.1	60S ribosomal protein L28 isoform 3 [OS=Homo sapiens]	0	51.318	35	8	45	8	169	19.1	10.83	85.29	8	Pf01778	6158	RPL28	19	ENSG00000108107.14	Cytoplasmic Ribosomal Proteins			1	0	0.971	1.081	1.001	0.854055	0.988452	0.947278	32.8	36.34	25	92.1	91.4	116.5	4.76	2.64	17.16	1.34906e+08	1.07301e+08	1.20508e+08	1.18433e+08	1.0143e+08	113067454	1.26075e+08	1.44749e+08	1.72653e+08	5	5	5
NP_004883.3	vesicle-trafficking protein SEC22b precursor [OS=Homo sapiens]	0	23.598	35	5	23	5	215	24.7	8.51	40.14	5	Pf00957, Pf13774	9554	SEC22B	1	ENSG00000265808.3		SNARE interactions in vesicular transport; Legionellosis; Phagosome		3	0	0.91	0.87	1.004	0.744494	0.517492	0.94848	18.93	27.13	24.67	105.1	114	81	10.78	8.84	5.19	1.38382e+07	9.99704e+06	1.10521e+07	1.35052e+07	1.00422e+07	1.10116e+07	7.59423e+06	8.09193e+06	8.14242e+06	5	5	4
NP_001243820.1	Sorcin isoform C [OS=Homo sapiens]	0	52.556	35	6	37	6	195	21.3	6	69.07	6	Pf00036, Pf13405, Pf13499, Pf13833	6717	SRI	7					0	0	0.968	0.863	0.884	0.84604	0.488638	0.564227	15.83	15.7	14.44	94.2	95.4	110.4	6.29	4.57	9.23	7.20616e+07	6.09155e+07	6.05027e+07	7.04641e+07	58277282	5.97651e+07	8.11764e+07	6.60934e+07	7.32561e+07	6	6	6
NP_006364.2	Synaptic vesicle membrane protein VAT-1 homolog [OS=Homo sapiens]	0	74.422	35	8	56	8	393	41.9	6.29	167.3	8	Pf00107, Pf08240, Pf13602	10493	VAT1	17	ENSG00000108828.15			Neutrophil degranulation	3	0	0.972	0.957	1.016	0.855953	0.801912	0.975333	16.19	17.65	20.5	96.5	102.5	100.9	4.78	3.09	2.37	6.64654e+07	6.37581e+07	6.73627e+07	7.08602e+07	5.93927e+07	6.66605e+07	6.64777e+07	6.69163e+07	6.78081e+07	7	7	8
NP_064535.1	GTP-binding protein SAR1a [OS=Homo sapiens]	0	29.954	35	5	24	2	198	22.4	6.68	23.89	5	Pf00025, Pf00071, Pf00503, Pf01926, Pf08477, Pf09439	56681	SAR1A	10	ENSG00000079332.14	Sterol Regulatory Element-Binding Proteins (SREBP) signalling	Legionellosis; Protein processing in endoplasmic reticulum		3	3	0.895	1.005	1.107	0.404598	0.9032	0.863955	23.68	13.32	25.8	98.5	102.4	99.1	7	5.42	1.17	1.79339e+08	1.59569e+08	1.93424e+08	1.85062e+08	1.45817e+08	1.65813e+08	1.70316e+08	1.65976e+08	1.62006e+08	4	4	5
NP_001005386.1	actin-related protein 2 isoform a [OS=Homo sapiens]	0	102.226	35	13	78	1	399	45.3	7.2	183.12	13	Pf00022	10097	ACTR2	2	ENSG00000138071.13	Association Between Physico-Chemical Features and Toxicity Associated Pathways; ESC Pluripotency Pathways			2	12	1.165	1.106	1.004	0.529625	0.962958	0.94848	28.73	27.81	21.3	101.4	98.8	99.9	3.11	11.36	26.1	7.75276e+07	6.92919e+07	7.82678e+07	5.93598e+07	6.3917e+07	6.74442e+07	4.38789e+07	7.05723e+07	7.05657e+07	11	12	12
CAA28571.1	unnamed protein product [OS=Homo sapiens]	0	39.083	35	5	28	5	244	25.8	7.37	77.75	5		5860	QDPR	4					0	0	1.154	1.112	1.035	0.833866	0.953458	0.997406	32.05	32.86	32.56	108	96.7	95.3	12.9	3.97	7.64	13781729	1.01903e+07	1.02003e+07	1.03348e+07	8.62063e+06	8.866e+06	9.6699e+06	8.20374e+06	9.21861e+06	4	4	4
NP_054779.1	malignant T-cell-amplified sequence 1 isoform 1 [OS=Homo sapiens]	0	35.426	35	4	26	4	181	20.5	8.82	58.4	4	Pf01472	28985	MCTS1	X	ENSG00000232119.7				0	0	1.033	1.069	1.046	0.997968	0.996014	0.979792	21.76	19.1	27.44	104.8	97.6	97.6	13.75	12.55	1.83	17406039	11626804	1.57839e+07	1.61945e+07	1.10281e+07	1.35008e+07	1.42508e+07	1.42316e+07	13620859	3	3	3
AAH12547.1	Eukaryotic translation initiation factor 4A, isoform 2 [OS=Homo sapiens]	0	143.02	35	16	166	2	408	46.5	5.48	409.33	16	Pf00270, Pf00271, Pf04851	1974	EIF4A2	3	ENSG00000156976.16	Translation Factors			1	0	1.018	1.235	1.224	0.974098	0.736462	0.500506	15.63	46.47	39.75	111.3	106.1	82.6	23.96	21.17	18.11	1.65148e+07	2.26367e+07	2.47306e+07	1.56977e+07	2.05047e+07	2.15629e+07	1.30677e+07	1.82539e+07	17246089	2	2	2
AAC03551.1	arsenite translocating atpase [OS=Homo sapiens]	0	33.979	35	7	22	7	348	38.8	4.91	48.84	7	Pf02374	439	ASNA1	19					0	0	0.905	0.887	0.928	0.754446	0.58621	0.73578	21.2	30.22	27.03	89.5	89.1	121.4	2.92	13.91	26.19	9.73096e+06	8.26207e+06	8.71425e+06	8.85175e+06	7.64947e+06	1.02817e+07	7.78764e+06	1.15782e+07	1.29991e+07	6	6	5
BAD96284.1	dendritic cell protein variant, partial [OS=Homo sapiens]	0	51.49	35	9	39	9	374	42.4	5.63	64.67	9	Pf01399	10480	EIF3M	11					0	0	1.186	1.011	0.818	0.662113	0.91118	0.251845	34.06	35.46	35.77	105.2	90.1	104.7	19.32	19.81	15.31	3.52368e+07	2.10246e+07	31640419	3.37005e+07	2.00064e+07	2.49053e+07	2.67933e+07	3.55571e+07	2.97275e+07	9	8	9
NP_008868.3	small ubiquitin-related modifier 2 isoform a precursor [OS=Homo sapiens]	0	49.535	35	3	44	2	95	10.9	5.5	68.08	3	Pf00240, Pf11976	6613	SUMO2	17	ENSG00000188612.11		RNA transport	SUMOylation of chromatin organization proteins; Formation of Incision Complex in GG-NER; SUMOylation of transcription factors; Processing of DNA double-strand break ends; SUMOylation of DNA replication proteins; SUMO is conjugated to E1 (UBA2:SAE1); SUMOylation of DNA damage response and repair proteins; SUMO is proteolytically processed; SUMO is transferred from E1 to E2 (UBE2I, UBC9); SUMOylati…	22	0	1.182	2.002	1.812	0.376735	0.00175764	0.00013246	27.73	16.25	34.81	131.2	111.8	56.9	13.74	9.77	3.37	1.95032e+08	2.19361e+08	2.36465e+08	1.99592e+08	203705535	1.80633e+08	9.94714e+07	9.70892e+07	1.02312e+08	2	2	2
AAC69625.1	u5 snRNP-specific 40 kDa protein [OS=Homo sapiens]	0	34.033	35	6	15	1	357	39.3	8.1	39.77	6	Pf00400	9410	SNRNP40	1		mRNA Processing			1	5	1.188	1	0.888	0.678954	0.89225	0.57695	30.69	35.86	18.96	101.6	92.3	106.1	19.9	5.58	1.37	1.91204e+07	1.13198e+07	1.43048e+07	1.41236e+07	1.12366e+07	11939382	1.44939e+07	1.39967e+07	1.428e+07	6	5	6
NP_001177966.1	26S proteasome non-ATPase regulatory subunit 1 isoform 2 [OS=Homo sapiens]	0	168.09	35	22	105	3	922	102.2	5.27	234.99	22	Pf01851, Pf13513, Pf13646	5707	PSMD1	2	ENSG00000173692.12	Proteasome Degradation; Parkin-Ubiquitin Proteasomal System pathway			2	17	1.15	1.111	0.911	0.558704	0.955136	0.678632	23.61	35.92	34.66	122	93.8	84.1	5.44	10.48	9.54	1.0084e+08	8.18012e+07	9.90601e+07	8.43147e+07	6.06279e+07	6.76149e+07	5.98531e+07	7.06649e+07	6.2267e+07	18	17	19
CAB66549.1	Hypothetical protein [OS=Homo sapiens]	0	28.497	35	4	16	4	182	20.4	6.79	34.24	4	Pf00149, Pf12850	51699	VPS29	12					0	0	1.008	1.076	0.989	0.961977	0.995256	0.916228	21.67	39.39	42.1	109.1	99.8	91.2	0.39	12.5	2.02	2.0207e+07	1.76684e+07	1.93268e+07	2.08299e+07	1.44788e+07	1.61445e+07	1.55684e+07	15140580	1.56112e+07	4	4	4
EAW92926.1	ribosomal protein L9, isoform CRA_a [OS=Homo sapiens]	0	68.782	35	6	93	2	136	15.3	9.44	258.53	6	Pf00347	6133	RPL9	4		Cytoplasmic Ribosomal Proteins			1	0	0.812	0.888	1.065	0.190153	0.589881	0.945631	21.48	15.84	19.14	88.1	106.9	105	2.82	4.31	6.81	2.76927e+07	2.29572e+07	2.51463e+07	3.02058e+07	2.48141e+07	2.84971e+07	2.9389e+07	2.54066e+07	28279571	2	2	2
BAA24361.1	hnRNP JKTBP [OS=Homo sapiens]	0	101.868	35	11	102	9	301	33.6	7.31	190.79	11	Pf00076, Pf13893, Pf14259	9987	HNRNPDL; HNRPDL	4	ENSG00000152795.17				0	0	1.089	1.049	0.967	0.872093	0.970938	0.875462	22.65	22.69	20.23	101.2	96.7	102.1	1.96	8.42	8.54	7.0389e+07	63890375	6.84755e+07	5.72847e+07	5.68175e+07	6.2672e+07	5.88019e+07	6.80248e+07	6.51627e+07	9	9	9
XP_011536806.1	PREDICTED: serine/threonine-protein phosphatase PP1-gamma catalytic subunit isoform X1 [OS=Homo sapiens]	0	124.948	35	11	97	2	362	41.4	6.07	258.8	11	Pf00149	5501	PPP1CC	12					0	0	1.297	4.351	3.355	0.573355	3.10618e-13	2.59563e-14	5.58	92.99	92.99	149.9	115.6	34.5	10.76	3.27	99.92	5833508	6.26904e+06	6.57082e+06	4858691	4.4001e+06	4.81119e+06	1.46409e+06	3.84914e+06	236491	1	1	1
NP_001135888.1	aminoacyl tRNA synthase complex-interacting multifunctional protein 1 isoform b precursor [OS=Homo sapiens]	0	83.858	35	8	43	8	336	37	8.65	109.89	8	Pf01588	9255	AIMP1	4	ENSG00000164022.16				0	0	0.937	0.91	0.97	0.759629	0.673056	0.883272	16.15	12.6	10.6	99.5	93.8	106.7	10.87	5.54	4.98	4.71709e+07	3.57225e+07	3.63183e+07	3.49769e+07	3.18162e+07	3.61421e+07	4.34836e+07	3.88051e+07	3.93213e+07	7	7	7
EAX03526.1	LSM2 homolog, U6 small nuclear RNA associated (S. cerevisiae), isoform CRA_b [OS=Homo sapiens]	0	19.606	35	3	16	3	113	12.7	5.86	47.92	3	Pf01423	57819	LSM2	6		mRNA Processing			1	0	0.803	0.706	0.866	0.218577	0.0704157	0.480096	67.28	54.68	36.9	64.9	108.2	126.9	56.18	6.38	17.99	11459073	6.7507e+06	2.1687e+07	1.68261e+07	1.57429e+07	1.77309e+07	2.63245e+07	2.01928e+07	1.8263e+07	3	3	3
CAB66585.1	Hypothetical protein [OS=Homo sapiens]	0	54.514	35	7	32	5	200	22.5	8.6	67.87	7	Pf00025, Pf00071, Pf04670, Pf08477	10890	RAB10	2					0	0	0.942	1.184	1.085	0.709083	0.828189	0.899802	27.69	18.36	41.75	101.8	108.9	89.3	12.13	9.19	11.12	1.06713e+08	8.01761e+07	7.99732e+07	1.033e+08	8.10168e+07	7.99927e+07	7.85588e+07	6.17733e+07	7.20901e+07	4	5	4
NP_055955.1	Tubulin--tyrosine ligase-like protein 12 [OS=Homo sapiens]	0	111.441	34	13	54	13	644	74.4	5.53	177.2	13	Pf03133	23170	TTLL12	22	ENSG00000100304.12			Carboxyterminal post-translational modifications of tubulin	3	0	0.956	0.945	1.003	0.833866	0.776009	0.94838	31.76	43.17	32.16	107.6	107.3	85	14.37	12.69	13.07	3.63487e+07	2.44698e+07	2.78029e+07	3.259e+07	2.24519e+07	2.5458e+07	2.12941e+07	1.91877e+07	2.4513e+07	11	10	10
NP_057185.1	60S ribosome subunit biogenesis protein NIP7 homolog isoform 1 [OS=Homo sapiens]	0	21.312	34	4	14	4	180	20.4	8.51	11.99	4	Pf03657	51388	NIP7	16	ENSG00000132603.13			Major pathway of rRNA processing in the nucleolus and cytosol	4	0	0.879	0.965	0.968	0.523276	0.817089	0.877458	31.93	43.77	29.15	105.9	101.8	92.3	15.02	21.79	15.92	30266675	1.96648e+07	2.41049e+07	3.19207e+07	2.01213e+07	2.0162e+07	2.51659e+07	1.99511e+07	1.80888e+07	4	4	4
BAG37620.1	unnamed protein product [OS=Homo sapiens]	0	178.253	34	18	100	1	700	80	5	272.86	18	Pf00648, Pf01067, Pf13833	824	CAPN2	1		Integrin-mediated Cell Adhesion; VEGFA-VEGFR2 Signaling Pathway			2	0	0.839	0.603	0.726	0.726404	0.0516891	0.095533	9.74	6.64	13.83	77.9	92.8	129.2	1.05	13.95	6.37		1.55711e+06	1.71877e+06	2.44484e+06	1.64994e+06	1.86762e+06	2870491	2570661			1	1
AAP20940.1	NAD(P)H dehydrogenase, quinone 1, partial [OS=Homo sapiens]	0	63.014	34	9	41	9	271	30.6	8.88	77.52	9	Pf02525, Pf03358	1728	NQO1	16		Dopamine metabolism; Aryl Hydrocarbon Receptor; Apoptosis-related network due to altered Notch3 in ovarian cancer; Transcriptional activation by NRF2; Photodynamic therapy-induced NFE2L2 (NRF2) survival signaling; Oxidative Stress			6	0	1.101	1.114	0.992	0.789592	0.950928	0.924192	15.33	24.25	23.55	104.9	98.8	96.3	4.01	6.55	7.6	1.13407e+08	1.04124e+08	1.04669e+08	1.04787e+08	8.80977e+07	8.53448e+07	1.01386e+08	9.39969e+07	8.47388e+07	8	9	9
AAH36452.1	KCNE1 protein [OS=Homo sapiens]	0.032	1.374	34	1	1	1	105	11.9	8.44	2.4	1	Pf02060	3753	KCNE1	21					0	0
AAH66307.1	Ras homolog enriched in brain [OS=Homo sapiens]	0	39.824	34	6	25	6	184	20.5	5.92	55.81	6	Pf00071, Pf01926, Pf08477	6009	RHEB	7		Follicle Stimulating Hormone (FSH) signaling pathway; Angiopoietin Like Protein 8 Regulatory Pathway; Insulin Signaling			3	0	1.249	1.522	1.097	0.453571	0.152	0.883272	22.46	27.62	25.7	138.8	114.2	47	9.89	6.52	4.99	32304284	2.68049e+07	2.52373e+07	2.37626e+07	2.17418e+07	2.02026e+07	9.81613e+06	8729772	9.31456e+06	5	5	5
EAW80126.1	TAF15 RNA polymerase II, TATA box binding protein (TBP)-associated factor, 68kDa, isoform CRA_c [OS=Homo sapiens]	0	108.667	34	10	62	9	603	63	7.96	142.93	10	Pf00076, Pf00641, Pf13893, Pf14259	8148	TAF15	17					0	1	1.03	0.915	0.857	0.993435	0.683772	0.434976	63.58	30.42	34.9	82.8	106.9	110.3	9.78	25.64	3.42	3.16527e+07	3.36255e+07	3.39604e+07	2.71095e+07	3.80899e+07	4.16169e+07	4.14132e+07	4.29918e+07	4.28538e+07	6	6	8
NP_996896.1	elongin-B isoform b [OS=Homo sapiens]	0	30.485	34	3	9	3	161	17.9	6.1	35.01	3	Pf00240	6923	TCEB2; ELOB	16	ENSG00000103363.14	Dual hijack model of Vif in HIV infection			1	0	1.106	1.026	0.969	0.881607	0.941075	0.882535	19	19.26	24.36	101	95.1	103.9	11.74	6.39	10.33	1.94455e+07	1.36709e+07	1.55338e+07	14481287	1.2551e+07	1.48797e+07	1.54981e+07	1.67639e+07	1.35253e+07	3	2	2
BAA14006.1	c-myc binding protein [OS=Homo sapiens]	0	17.842	34	4	5	4	167	18.6	5.91	11.81	4	Pf02996								0	0	1.213	1.299	1.015	0.710172	0.575518	0.973916	14.65	11.19	19.82	112	98.9	89.1	23.16	4.28	12.29	1.27678e+07	8.9312e+06	7.58335e+06	7.88338e+06	7.45785e+06	7.87659e+06	8490254	6.50668e+06	7.28868e+06	3	3	2
NP_004420.1	ephrin-B1 precursor [OS=Homo sapiens]	0	70.385	34	7	48	7	346	38	8.94	112.87	7	Pf00812	1947	EFNB1	X	ENSG00000090776.5		Axon guidance	EPH-ephrin mediated repulsion of cells; Ephrin signaling; EPHB-mediated forward signaling	7	0	1.075	1.012	1.024	0.936085	0.91118	0.987057	28.66	22.97	16.76	98.3	103	98.7	5.47	14.95	11.41	3.86397e+07	3.14608e+07	3.29644e+07	2.92119e+07	3.46622e+07	3.29165e+07	3.83361e+07	3.26532e+07	2.9839e+07	6	7	7
AAD02918.1	NADP-dependent isocitrate dehydrogenase [OS=Homo sapiens]	0	106.568	34	13	73	13	414	46.7	6.8	140.94	13	Pf00180	3417	IDH1	2		Glutathione metabolism			1	0	0.948	0.976	1.044	0.747439	0.840847	0.981047	21.68	36.48	25.54	105.5	101.9	92.6	5.03	8.45	7.78	1.17155e+08	1.11021e+08	1.22139e+08	1.31673e+08	1.01338e+08	1.04748e+08	1.15465e+08	1.00795e+08	9.7218e+07	12	13	13
AAB59457.1	voltage-dependent anion channel [OS=Homo sapiens]	0	63.661	34	9	57	9	294	31.6	7.56	108.98	9	Pf01459	7417	VDAC2	10					0	0	0.926	0.945	1.022	0.616136	0.775855	0.982577	25.32	26.13	24.7	93.6	100.9	105.6	14.41	16.61	1.7	1.17485e+08	8.26233e+07	8.59134e+07	1.22614e+08	7.95217e+07	8.90063e+07	9.82914e+07	98597637	9.469e+07	9	9	9
BAA02656.1	DnaJ protein homolog [OS=Homo sapiens]	0	142.543	34	7	85	7	397	44.8	7.11	279.98	7	Pf00226, Pf00684, Pf01556	3301	DNAJA1	9		Exercise-induced Circadian Regulation			1	0	1.247	1.319	1.121	0.122756	0.521712	0.821602	28.68	27.86	25.03	101.9	104.1	93.9	4.74	22.44	8.89	9.8489e+07	7.83508e+07	8.80481e+07	6.46715e+07	8.98765e+07	8.26331e+07	9.13575e+07	7.69581e+07	7.65432e+07	7	7	7
AAA20046.1	Ubiquinol-cytochrome c reductase core I protein [OS=Homo sapiens]	0	103.947	34	11	62	11	480	52.6	6.37	153.19	11	Pf00675, Pf05193, Pf08367	7384	UQCRC1	3		Electron Transport Chain			1	0	0.989	1.161	1.2	0.887638	0.875617	0.578272	22.73	20.97	21.47	103.7	107.6	88.7	7.46	9.86	9.61	9.01116e+07	7.01799e+07	7.46396e+07	9.23169e+07	6.83639e+07	7.26987e+07	5.8617e+07	6.94404e+07	6.15525e+07	11	11	11
XP_011539528.1	PREDICTED: D-3-phosphoglycerate dehydrogenase isoform X1 [OS=Homo sapiens]	0	132.684	34	17	110	17	607	64.7	6.87	219.54	17	Pf00389, Pf02826	26227	PHGDH	1		Trans-sulfuration and one carbon metabolism			1	0	0.809	0.789	0.967	0.0315809	0.239351	0.873716	33.51	42.19	27.68	105.3	94	100.7	27.55	20.22	10.21	2.02096e+08	2.30363e+08	1.43137e+08	2.34813e+08	1.48733e+08	1.547e+08	2.05311e+08	1.65958e+08	1.73005e+08	15	16	15
NP_001966.1	Gamma-enolase [OS=Homo sapiens]	0	95.721	34	10	253	6	434	47.2	5.03	585.6	10	Pf00113, Pf03952, Pf13378	2026	ENO2	12	ENSG00000111674.8	Glycolysis and Gluconeogenesis	RNA degradation; HIF-1 signaling pathway; Metabolic pathways; Glycolysis / Gluconeogenesis; Biosynthesis of amino acids; Carbon metabolism	Gluconeogenesis; Glycolysis	12	0	0.829	0.959	1.129	0.261264	0.801912	0.799982	18.11	24.12	15.7	92.9	110.2	97	2.38	16.7	11.18	21546381	1.83442e+07	2.09253e+07	29659068	2.10751e+07	1.99239e+07	2.34355e+07	2.02936e+07	18259175	5	5	5
NP_004544.1	NADH dehydrogenase [ubiquinone] iron-sulfur protein 6, mitochondrial precursor [OS=Homo sapiens]	0	25.277	34	3	12	3	124	13.7	8.28	25.4	3	Pf10276	4726	NDUFS6	5	ENSG00000145494.11	Electron Transport Chain; Oxidative phosphorylation	Alzheimer's disease; Oxidative phosphorylation; Huntington's disease; Metabolic pathways; Non-alcoholic fatty liver disease (NAFLD); Parkinson's disease	Complex I biogenesis	13	0	1.145	1.503	1.4	0.778428	0.171051	0.0897212	23.37	40.94	33.52	131.9	104.2	64	1.04	13.02	19.52	2.57098e+07	2.2262e+07	2.4717e+07	2.25644e+07	1.53897e+07	1.77103e+07	1.14794e+07	1.10681e+07	1.52952e+07	3	3	3
BAB69067.1	signal recognition particle 14kd [OS=Homo sapiens]	0	49.63	34	5	37	5	136	14.5	10.04	68.96	5	Pf02290	6727	SRP14	15					0	0	1.107	1.158	1.062	0.839147	0.88306	0.94838	39.18	39.85	25.91	109.4	100.3	90.3	11.77	19.97	4.68	80228164	5.71016e+07	6.29291e+07	6.44593e+07	3.76408e+07	5.29447e+07	5.0338e+07	5.14206e+07	4.6479e+07	5	5	5
XP_005271449.1	PREDICTED: hypoxia up-regulated protein 1 isoform X1 [OS=Homo sapiens]	0	217.95	34	23	128	23	1000	111.3	5.22	335.01	23	Pf00012	10525	HYOU1	11					0	0	0.897	0.789	0.902	0.422975	0.23871	0.642149	39.98	37.63	34.02	86.2	97	116.8	4.82	3.07	11.79	1.16708e+08	9.2514e+07	1.06304e+08	1.22171e+08	1.03885e+08	1.06556e+08	1.43052e+08	1.12196e+08	1.35853e+08	19	20	19
NP_005727.1	Alpha-centractin [OS=Homo sapiens]	0	43.911	34	6	25	3	376	42.6	6.64	78.46	6	Pf00022	10121	ACTR1A	10	ENSG00000138107.12			COPI-independent Golgi-to-ER retrograde traffic; Regulation of PLK1 Activity at G2/M Transition; AURKA Activation by TPX2; Anchoring of the basal body to the plasma membrane; Recruitment of NuMA to mitotic centrosomes; Recruitment of mitotic centrosome proteins and complexes; Loss of Nlp from mitotic centrosomes; COPI-mediated anterograde transport; MHC class II antigen presentation; HSP90 chaper…	33	3	1.11	1.083	0.966	0.869879	0.98686	0.873297	23.46	28.48	20.09	101	97.9	101	12.1	8.18	10.31	2.97892e+07	2.06657e+07	2.39841e+07	2.30255e+07	2.10475e+07	1.89559e+07	2.32494e+07	2.4491e+07	1.97739e+07	5	4	5
NP_001247421.1	radixin isoform 1 [OS=Homo sapiens]	0	140.188	34	19	179	8	604	71	6.71	297.8	19	Pf00373, Pf00769, Pf09379, Pf09380	5962	RDX	11	ENSG00000137710.14	Regulation of Actin Cytoskeleton			1	0	1.255	1.088	0.94	0.451433	0.981153	0.786559	23.49	44.21	38.34	112.2	85.7	102	5.22	4.89	10.22	2.45194e+07	2.02575e+07	2.09752e+07	1.79199e+07	1.43411e+07	1.5455e+07	1.94171e+07	1.64282e+07	19963175	6	6	6
AAX88940.1	unknown, partial [OS=Homo sapiens]	0	9.273	34	2	8	2	154	16.5	5.24	22.63	2	Pf01398, Pf14464	10213	PSMD14	2		Parkin-Ubiquitin Proteasomal System pathway			1	0	1.202	1.207	0.997	0.697446	0.79448	0.934883	14.66	11.67	21.61	115.3	91.4	93.2	2.6	12.58	8.43	1.40843e+07	1.1805e+07	1.27459e+07	9872375	8.84149e+06	1.14213e+07	1.14497e+07	9.62195e+06	9.78768e+06	2	2	2
XP_006721933.1	PREDICTED: integrin beta-4 isoform X6 [OS=Homo sapiens]	0	313.647	34	40	179	40	1787	198.8	6.16	416.36	40	Pf00041, Pf00362, Pf03160, Pf07965, Pf07974	3691	ITGB4	17		Integrin-mediated Cell Adhesion; Arrhythmogenic Right Ventricular Cardiomyopathy; Alpha 6 Beta 4 signaling pathway; Focal Adhesion; TGF-beta Signaling Pathway			5	0	1.019	0.794	0.79	0.993345	0.253635	0.157952	22.61	27.71	29.16	82.9	88.5	128.7	4.64	5.7	7.72	1.54926e+08	1.4841e+08	1.54605e+08	1.52387e+08	1.43355e+08	158374631	2.52227e+08	2.2812e+08	2.1029e+08	27	32	32
NP_004490.2	Heterogeneous nuclear ribonucleoprotein A/B isoform b [OS=Homo sapiens]	0	98.685	34	11	92	10	285	30.6	7.91	195.93	11	Pf00076, Pf08143, Pf13893, Pf14259	3182	HNRNPAB	5	ENSG00000197451.11	Preimplantation Embryo; mRNA Processing			2	0	1.035	1.198	1.099	0.989476	0.801912	0.883272	35.65	24.85	28.55	98.4	106.3	95.4	4.27	2.46	9.21	1.20112e+08	9.79444e+07	1.05555e+08	1.13961e+08	9.60971e+07	1.06381e+08	8.79401e+07	9.81311e+07	1.02672e+08	8	7	7
XP_016855583.1	PREDICTED: nuclear migration protein nudC isoform X1 [OS=Homo sapiens]	0	74.471	34	11	76	11	392	45.2	5.96	125.04	11	Pf04969, Pf14050	10726	NUDC	1					0	0	1.031	1.078	1.01	0.995934	0.991725	0.962355	14.58	25.21	23.06	109.7	100.2	90.1	4.83	9.74	7.48	2.09334e+08	1.65917e+08	1.90195e+08	1.97385e+08	1.5092e+08	1.52314e+08	1.67606e+08	1.42314e+08	1.47249e+08	10	10	10
CAI46271.1	Hypothetical protein [OS=Homo sapiens]	0	41.642	34	7	22	6	303	34.8	8.95	32.17	7	Pf00069, Pf01636, Pf07714, Pf14531	983	CDK1	10		Cell Cycle; Retinoblastoma (RB) in Cancer; ATM Signaling Pathway; TGF-beta Signaling Pathway; G1 to S cell cycle control			5	0	1.293	1.551	1.198	0.303245	0.124697	0.586634	28.1	34.01	18.23	121.7	96.5	81.8	16.66	9.5	3.05	3.04383e+07	2.63157e+07	2.11937e+07	2.24659e+07	1.6941e+07	2.15005e+07	1.90721e+07	17592587	1.81421e+07	5	6	6
XP_005253566.1	PREDICTED: liprin-beta-1 isoform X4 [OS=Homo sapiens]	0	222.642	34	26	168	2	1025	115.4	5.72	373.72	26	Pf00536, Pf04111, Pf05483, Pf05911, Pf07647	8496	PPFIBP1	12					0	22	1.091	1.104	1.034	0.831454	0.96713	0.997979	32.78	32.11	32.62	106.1	102.3	91.6	13.59	19.78	12.93	147693655	1.66456e+08	1.7741e+08	1.17647e+08	1.49448e+08	1.57092e+08	1.29295e+08	1.45446e+08	1.63132e+08	22	23	23
NP_002159.2	isocitrate dehydrogenase [NADP], mitochondrial isoform 1 precursor [OS=Homo sapiens]	0	55.427	34	11	45	11	452	50.9	8.69	60.18	11	Pf00180	3418	IDH2	15	ENSG00000182054.9	TCA Cycle	Carbon metabolism; 2-Oxocarboxylic acid metabolism; Peroxisome; Glutathione metabolism; Citrate cycle (TCA cycle); Metabolic pathways; Biosynthesis of amino acids	Transcriptional activation of mitochondrial biogenesis; Citric acid cycle (TCA cycle)	15	0	0.997	1.461	1.393	0.917914	0.230756	0.096341	30.84	32.68	40.25	122.4	103.3	74.2	4.7	22.63	15.02	3.28779e+07	2.7441e+07	3.27815e+07	3.63349e+07	2.28794e+07	2.24389e+07	1.55312e+07	1.7986e+07	2.04579e+07	9	10	10
AAC15854.1	ribosomal protein S13, partial [OS=Homo sapiens]	0	43.411	34	5	64	5	116	13.3	10.59	114.02	5	Pf00312, Pf08069	6207	RPS13	11		Cytoplasmic Ribosomal Proteins			1	0	1.043	1.225	1.144	0.970243	0.753401	0.751759	10.78	16.17	10.28	110.2	104.9	85	2.7	2.02	7.29	3.36002e+08	3.08024e+08	3.33764e+08	3.16131e+08	2.75982e+08	2.82476e+08	2.79609e+08	2.44575e+08	2.38351e+08	5	5	5
XP_016858330.1	PREDICTED: vesicle-associated membrane protein 3 isoform X1 [OS=Homo sapiens]	0	27.684	34	3	17	3	122	13.8	8.44	77.7	3	Pf00957	9341	VAMP3	1					0	0	1.29	1.19	0.945	0.583645	0.816852	0.802875	14.53	22.1	29.91	107.9	93.6	98.6	8.99	4.99	7.84	7.33758e+06	6.07862e+06	5.83031e+06	5.80233e+06	4.62177e+06	5.26748e+06	5.85556e+06	5.94534e+06	5.06587e+06	2	2	2
NP_001013685.1	Putative peptidyl-tRNA hydrolase PTRHD1 [OS=Homo sapiens]	0	31.461	34	3	13	3	140	15.8	9.1	53.75	3		391356	PTRHD1	2	ENSG00000184924.5				0	0	1.662	1.955	1.434	0.113253	0.0439111	0.229554	47.07	31.31	55.01	128.5	101.8	69.7	7.45	37.07	10.33	3.41814e+06	3.00863e+06	3.69728e+06	2.56584e+06	1.72452e+06	3.72985e+06	1.49196e+06	1.79604e+06	1.67482e+06	2	2	3
NP_003452.1	Zyxin [OS=Homo sapiens]	0	97.651	34	11	81	11	572	61.2	6.67	238.03	11	Pf00412	7791	ZYX	7	ENSG00000159840.15	Integrin-mediated Cell Adhesion; Focal Adhesion	Focal adhesion		3	0	1.175	0.871	0.808	0.55746	0.523519	0.218092	26.29	30.92	29.3	96.8	90.5	112.6	11.01	14.08	8.11	6.09553e+07	66366408	6.68603e+07	5.0115e+07	5.42855e+07	6.14952e+07	6.96769e+07	7.3875e+07	7.97204e+07	8	9	9
XP_016868887.1	PREDICTED: eukaryotic translation initiation factor 3 subunit E isoform X1 [OS=Homo sapiens]	0	70.926	34	15	65	15	480	55.9	6.74	84.26	15	Pf01399, Pf09440	3646	EIF3E	8		Translation Factors			1	0	1.047	1.033	0.981	0.968349	0.953602	0.897247	26.71	38.35	28.76	97.6	95.6	106.8	5.26	6.5	7.75	8.42855e+07	6.66752e+07	7.40347e+07	6.86896e+07	6.29489e+07	7.23242e+07	8.41585e+07	7.69542e+07	7.00809e+07	14	15	14
NP_077001.1	dCTP pyrophosphatase 1 [OS=Homo sapiens]	0	26.349	34	4	20	4	170	18.7	5.03	44.07	4		79077	DCTPP1	16	ENSG00000179958.8		Pyrimidine metabolism; Metabolic pathways	Interconversion of nucleotide di- and triphosphates	5	0	0.773	0.826	0.984	0.0890667	0.356278	0.905973	13.85	28.87	21.36	77.8	109.9	112.3	12.15	11.45	3.87	1.42131e+07	1.52746e+07	1.69521e+07	2.59793e+07	20385718	19149968	2.32447e+07	24132325	2.22779e+07	4	4	4
NP_001824.1	clathrin light chain A isoform a [OS=Homo sapiens]	0	53.957	33	8	43	8	218	23.6	4.53	92.74	8	Pf01086	1211	CLTA	9	ENSG00000122705.16	Synaptic Vesicle Pathway			1	0	1.012	1.113	1.059	0.978127	0.951643	0.956256	23.59	27.24	15.08	112.4	96	91.7	13.21	1.76	4.92	1.18252e+08	1.32241e+08	1.41142e+08	1.17695e+08	1.06902e+08	1.1072e+08	1.07183e+08	1.15817e+08	1.08638e+08	7	7	7
CAA07491.1	PBK1 protein [OS=Homo sapiens]	0	135.437	33	16	85	16	517	58.1	10.11	127.46	16	Pf00687	26156	RSL1D1	16		Senescence and Autophagy in Cancer			1	0	0.917	0.92	0.997	0.567853	0.703331	0.934736	21.76	25.61	18.46	93.8	110.9	95.3	10.48	9.54	14.78	1.25469e+08	8.99558e+07	1.02659e+08	1.32369e+08	1.05457e+08	1.01439e+08	1.25906e+08	9.42947e+07	9.83617e+07	15	14	12
XP_011533354.1	PREDICTED: general transcription factor IIF subunit 2 isoform X1 [OS=Homo sapiens]	0	30.473	33	6	23	6	275	30.9	9.29	37.9	6	Pf02270	2963	GTF2F2	13		Eukaryotic Transcription Initiation			1	0	1.015	1.136	1.172	0.972529	0.91118	0.674575	14.9	18.72	21.37	120.4	101.9	77.7	3.28	17.43	20.4	2.50213e+07	22194182	2.5292e+07	2.50215e+07	17732212	16532589	1.97056e+07	1.48042e+07	1.30008e+07	4	4	4
AEA35014.1	UBE2L3/KRAS fusion protein [OS=Homo sapiens]	0	90.042	33	7	42	4	296	34	8.1	106.95	7	Pf00071, Pf00179, Pf08477	3845	KRAS	12		IL-5 Signaling Pathway; RalA downstream regulated genes; TNF alpha Signaling Pathway; Oncostatin M Signaling Pathway; Extracellular vesicle-mediated signaling in recipient cells; G Protein Signaling Pathways; MAPK Signaling Pathway; MAPK Cascade; EGF/EGFR Signaling Pathway; Regulation of Actin Cytoskeleton; ErbB Signaling Pathway; DNA Damage Response (only ATM dependent); Serotonin Receptor 2 and…	Oxytocin signaling pathway; Endocrine resistance; Chronic myeloid leukemia; Long-term depression; Tight junction; Melanoma; ErbB signaling pathway; Estrogen signaling pathway; Rap1 signaling pathway; Thyroid cancer; FoxO signaling pathway; Proteoglycans in cancer; Serotonergic synapse; Glioma; Endometrial cancer; GnRH signaling pathway; Neurotrophin signaling pathway; Regulation of actin cytoskel…		77	3	1.242	1.361	1.017	0.348572	0.42089	0.976794	31.83	42.33	35.97	115	95.1	89.9	20.44	17.29	9.86	5.51815e+07	3.17302e+07	4.56722e+07	3.92494e+07	2.45561e+07	3.4686e+07	3.46126e+07	3.61463e+07	2.94749e+07	7	7	7
NP_001186600.1	calumenin isoform c precursor [OS=Homo sapiens]	0	51.505	33	6	24	6	323	38	4.63	31.25	6	Pf13499	813	CALU	7	ENSG00000128595.16	NOTCH1 regulation of human endothelial cell calcification			1	0	1.351	1.312	0.963	0.144553	0.539384	0.865051	50.21	30.8	31.88	114.4	90.8	94.8	4.36	11.56	15	3.33367e+07	3.07202e+07	3.06617e+07	2.98629e+07	2.18314e+07	2.25589e+07	1.94657e+07	2.49389e+07	2.50086e+07	6	6	5
EAW81759.1	dynein, cytoplasmic 1, heavy chain 1, isoform CRA_a, partial [OS=Homo sapiens]	0	817.992	33	117	583	1	4583	525.6	6.52	1337	117	Pf00769, Pf03028, Pf03915, Pf04156, Pf07246, Pf07728, Pf08385, Pf08393, Pf12774, Pf12775, Pf12777, Pf12780, Pf12781, Pf13173, Pf13207, Pf13401	1778	DYNC1H1	14					0	115	1.031	0.939	0.918	0.995801	0.759421	0.706355	26.47	28.77	24.59	95.8	94.7	109.5	0.82	1.77	3.27	6.19351e+08	5.33162e+08	5.79669e+08	5.68178e+08	4.97842e+08	5.43043e+08	6.12278e+08	6.30157e+08	6.34239e+08	108	104	108
NP_039268.1	N(G),N(G)-dimethylarginine dimethylaminohydrolase 2 [OS=Homo sapiens]	0	17.158	33	5	10	5	285	29.6	6.01	24.13	5	Pf02274	23564	DDAH2	6; CHR_HSCHR6_MHC_MANN_CTG1; CHR_HSCHR6_MHC_DBB_CTG1; CHR_HSCHR6_MHC_SSTO_CTG1; CHR_HSCHR6_MHC_MCF_CTG1; CHR_HSCHR6_MHC_QBL_CTG1; CHR_HSCHR6_MHC_COX_CTG1	ENSG00000233076.6; ENSG00000227317.6; ENSG00000213722.8; ENSG00000228128.6; ENSG00000225635.7; ENSG00000206395.8; ENSG00000226634.6			eNOS activation	4	0	1.299	0.877	0.664	0.638166	0.594299	0.0187959	23.81	16.59	24.99	136.1	100.2	63.7	38.45	52.81	14.81	2.27255e+06	4.47375e+06	4573027	4.18603e+06	2922996	1117068	2.07539e+06	2.57435e+06	1.97451e+06	1	2	2
EAW79783.1	ribosomal protein L24, isoform CRA_d [OS=Homo sapiens]	0	58.739	33	8	67	8	168	19.4	11.3	113.13	8	Pf01246	6152	RPL24	3		Cytoplasmic Ribosomal Proteins			1	0	0.877	0.939	1.062	0.282526	0.760093	0.94838	36.1	27.19	16.31	99.7	101.7	98.7	8.85	1.34	1.94	2.04564e+08	1.58093e+08	1.6406e+08	1.71623e+08	1.52301e+08	1.63499e+08	1.65013e+08	1.57914e+08	1.62903e+08	7	6	6
NP_006749.1	splicing factor U2AF 35 kDa subunit isoform a [OS=Homo sapiens]	0	72.973	33	7	50	5	240	27.9	8.81	113.87	7	Pf00076, Pf00642, Pf13893	7307; 102724594	U2AF1; LOC102724594; U2AF1L5	21	ENSG00000160201.11; ENSG00000275895.6	mRNA Processing	Shigellosis; Spliceosome	Cleavage of Growing Transcript in the Termination Region ; Transport of Mature mRNA derived from an Intron-Containing Transcript; mRNA 3'-end processing; mRNA Splicing - Major Pathway	14	3	1.127	1.223	0.998	0.662113	0.759587	0.938339	29.8	24.36	27.08	110.3	88.7	101	6.05	11.01	5.41	9.74376e+07	9.13542e+07	1.04425e+08	9.43178e+07	6.81502e+07	7.33669e+07	8.82209e+07	9.45896e+07	8.54192e+07	6	6	6
BAD96696.1	proteasome alpha 2 subunit variant, partial [OS=Homo sapiens]	0	79.057	33	6	48	6	234	25.8	7.94	147.16	6	Pf00227, Pf10584	5683	PSMA2	7		Proteasome Degradation			1	0	0.959	0.882	0.954	0.839019	0.565816	0.834243	16.83	13.55	13.33	75.5	80	144.6	14.2	8.12	5.23	4.23756e+07	2.83776e+07	3.29301e+07	3.45602e+07	2.67988e+07	33177216	6.11538e+07	5.93576e+07	6.47122e+07	6	4	5
AQN67632.1	Talin-1 [OS=Homo sapiens]	0	420.049	33	55	264	55	2558	271.3	6.11	667.9	55	Pf00373, Pf01608, Pf02174, Pf08913, Pf09141, Pf09379	7094	TLN1	9		Integrin-mediated Cell Adhesion; Focal Adhesion			2	0	1.106	1.11	1.023	0.769251	0.956254	0.985052	19.87	21.74	20.06	103.5	100.5	96	3.35	10.86	8.38	2.57809e+08	2.36989e+08	2.42254e+08	1.9448e+08	2.08101e+08	2.18159e+08	1.93603e+08	2.23224e+08	2.14091e+08	46	44	44
EAW96076.1	calpastatin, isoform CRA_l [OS=Homo sapiens]	0	172.326	33	19	97	19	836	90.1	5.36	211.77	19	Pf00748	831	CAST	5					0	0	1.261	1.299	0.956	0.216515	0.573503	0.83934	30.01	47.36	46.23	110.9	87.8	101.3	0.84	9.97	14.31	6.82561e+07	5.87038e+07	6.47502e+07	6.00092e+07	4.45131e+07	4.70025e+07	6.44801e+07	5.61867e+07	4.69826e+07	16	16	15
BAG70088.1	annexin I [OS=Homo sapiens]	0	37.729	33	7	25	7	346	38.7	7.02	65.67	7	Pf00191	301	ANXA1	9		VEGFA-VEGFR2 Signaling Pathway; Prostaglandin Synthesis and Regulation			2	0	0.914	0.693	0.879	0.723483	0.054777	0.537097	43	52.73	61.09	89.4	94.1	116.5	51.39	56.94	61.5	4742619	1.24441e+07	1.48585e+07	4.22253e+06	1.23817e+07	1.57932e+07	3.85825e+06	1.81983e+07	1.66391e+07	3	5	6
AAB67716.1	Tubulin folding cofactor B [OS=Homo sapiens]	0	63.178	33	6	38	6	244	27.4	5.24	84.95	6	Pf01302, Pf14560	1155	TBCB	19					0	0	1.207	1.195	1.132	0.604515	0.804553	0.795016	25.39	37.75	25.46	118.2	92.3	89.4	8.97	4.39	17.57	2.11833e+07	2.15409e+07	2.37495e+07	1.81164e+07	1.60358e+07	1.56345e+07	1.32383e+07	1.68385e+07	18349408	6	5	6
Q9P2E9.4	RecName: Full=Ribosome-binding protein 1; AltName: Full=180 kDa ribosome receptor homolog; Short=RRp; AltName: Full=ES/130-related protein; AltName: Full=Ribosome receptor protein [OS=Homo sapiens]	0	174.113	33	22	104	21	1410	152.4	8.6	295.37	22	Pf03276, Pf04156, Pf05104, Pf09606, Pf12128, Pf13779	6238	RRBP1	20		Ectoderm Differentiation	Protein processing in endoplasmic reticulum		2	1	1.362	1.256	0.999	0.0251777	0.683262	0.939231	23.61	33.01	29.31	128	95.5	76.5	10.35	9.23	15.17	8.89173e+07	66976385	6.95147e+07	5.57741e+07	4.71763e+07	4.32546e+07	5.2815e+07	4.13343e+07	3.89862e+07	18	17	19
XP_011541031.1	PREDICTED: tripartite motif-containing protein 29 isoform X1 [OS=Homo sapiens]	0	138.944	33	17	82	17	622	69.3	7.64	192.73	17	Pf00643, Pf03938	23650	TRIM29	11					0	0	0.962	0.892	0.904	0.810406	0.600605	0.650127	21.41	40.28	31.47	90.9	102.3	106.8	3.76	7.72	11.6	8.51411e+07	7.29172e+07	7.51421e+07	7.7932e+07	7.90475e+07	8.19839e+07	9.31465e+07	7.31628e+07	8.79465e+07	14	14	15
AAH66326.1	ribosomal protein L27A [OS=Homo sapiens]	0	63.172	33	6	67	6	148	16.5	11	187.15	6	Pf00828	6157	RPL27A	11		Cytoplasmic Ribosomal Proteins			1	0	1.084	1.124	0.987	0.852424	0.933651	0.912404	21.93	28.23	30.09	94	100.7	105.3	17.35	5.84	4.94	1.72099e+08	113871954	1.21263e+08	1.25772e+08	1.23762e+08	1.21928e+08	1.43741e+08	1.31776e+08	1.2712e+08	6	6	6
EAW86739.1	transcription elongation factor A (SII), 1, isoform CRA_a [OS=Homo sapiens]	0	57.118	33	10	42	10	287	32.2	8.38	63.13	10	Pf01096, Pf07500, Pf08711	6917	TCEA1	8					0	0	0.916	0.975	1.019	0.679639	0.837544	0.979821	24.49	29.44	18.83	105.5	96.5	98.1	9.44	7.67	5.62	2.64886e+07	2.75035e+07	2.96022e+07	2.68176e+07	2.66219e+07	2.45823e+07	28698766	26155077	2.50247e+07	10	10	10
AAI05803.1	FTH1 protein, partial [OS=Homo sapiens]	0	54.11	33	4	29	4	245	27.8	6.95	73.83	4	Pf00210	2495	FTH1	11					0	0	0.813	0.723	0.459	0.157668	0.0933562	5.64936e-09	82.97	66.33	105.55	82.1	110.7	107.1	54.84	46.59	5.3	11170912	2.87289e+07	3.94558e+07	1.87112e+07	4.6925e+07	3.86924e+07	3.84838e+07	3.87312e+07	4.14261e+07	3	3	3
NP_005442.2	PDZ and LIM domain protein 7 isoform 1 [OS=Homo sapiens]	0	55.603	33	8	28	8	457	49.8	8.41	61.07	8	Pf00412, Pf00595	9260	PDLIM7	5	ENSG00000196923.13	EBV LMP1 signaling		RET signaling	4	0	1.056	0.885	0.786	0.984013	0.579249	0.14711	26.57	28.52	19.76	102.4	92	105.6	6.92	5.3	8.45	3.39164e+07	2.86492e+07	2.81364e+07	3.02053e+07	2.43286e+07	2.54721e+07	3.11692e+07	3.02459e+07	34805904	7	7	7
AAA52344.1	elongation factor 1 alpha, partial [OS=Homo sapiens]	0	84.875	33	6	278	1	227	24.2	9.58	758.29	6	Pf03143, Pf03144	1915	EEF1A1	6		Translation Factors			1	0
NP_005906.2	DNA replication licensing factor MCM6 [OS=Homo sapiens]	0	215.635	33	22	155	22	821	92.8	5.41	383.73	22	Pf00493, Pf01078, Pf07728, Pf14551	4175	MCM6	2	ENSG00000076003.4	Cell Cycle; Retinoblastoma (RB) in Cancer; G1 to S cell cycle control; DNA Replication	DNA replication; Cell cycle	M/G1 Transition; Assembly of the pre-replicative complex; Unwinding of DNA; Regulation of DNA replication; Activation of ATR in response to replication stress; Activation of the pre-replicative complex; Orc1 removal from chromatin; Removal of licensing factors from origins	26	0	1.014	1.077	1.078	0.981527	0.994333	0.916228	24.87	29.08	19.16	105.6	103.6	90.8	6.1	3.44	8.37	2.00652e+08	1.93222e+08	2.1372e+08	1.92358e+08	1.79224e+08	1.89413e+08	1.60562e+08	1.71634e+08	1.84748e+08	21	21	21
AAC08434.1	endobrevin [OS=Homo sapiens]	0	28.285	33	3	19	3	100	11.4	6.54	34.77	3	Pf00957	8673	VAMP8	2					0	0	0.926	1.337	1.35	0.747439	0.473968	0.157337	24.81	20.9	30.33	113.3	110.8	75.9	7.87	12.22	6.76	2.28947e+07	1.73297e+07	1.92327e+07	2.10837e+07	1.44789e+07	1.7282e+07	1.39882e+07	1.22448e+07	1.21057e+07	3	3	3
AAH28386.1	Ribosomal RNA processing 1 homolog B (S. cerevisiae) [OS=Homo sapiens]	0	89.26	33	13	34	13	758	84.4	9.76	78.79	13	Pf05997	23076	RRP1B	21					0	0	0.934	0.956	0.981	0.762888	0.801912	0.897247	28.9	31.88	24.09	104	96.4	99.6	20.18	13.82	10.21	3.24266e+07	1.88393e+07	2.53335e+07	2.88379e+07	1.97904e+07	2.15711e+07	2.74429e+07	2.2303e+07	2.28986e+07	12	10	12
XP_011515885.1	PREDICTED: ubiquitin-conjugating enzyme E2 variant 2 isoform X1 [OS=Homo sapiens]	0	25.305	33	3	18	1	173	19.5	4.88	55.77	3	Pf00179	7336	UBE2V2	8					0	0	1.045	1.108	1.079	0.999478	0.993874	0.99584	4.4	11.96	18.06	104.3	101.6	94.1	5.46	4.59	13.48	1.51942e+06	1412130	1.60937e+06	1.36718e+06	1.2991e+06	1.37523e+06	1531380	1.31663e+06	1.13653e+06	1	1	1
NP_001073027.1	heterogeneous nuclear ribonucleoprotein U-like protein 2 [OS=Homo sapiens]	0	198.395	33	20	123	20	747	85.1	4.91	308.26	20	Pf00622, Pf02037, Pf08433, Pf13671	221092	HNRNPUL2	11	ENSG00000214753.2				0	0	0.948	0.865	0.915	0.747599	0.497906	0.697459	32.26	33.97	25.89	104.6	90.9	104.6	8.2	12.34	2.79	9.7952e+07	1.0019e+08	9.77744e+07	1.01071e+08	7.38047e+07	7.47653e+07	9.32653e+07	9.29293e+07	9.57925e+07	18	18	19
EAW81764.1	dynein, cytoplasmic 1, heavy chain 1, isoform CRA_f [OS=Homo sapiens]	0	812.843	33	116	574	1	4649	532.5	6.42	1320.12	116	Pf00769, Pf03028, Pf03915, Pf04156, Pf07246, Pf07728, Pf08385, Pf08393, Pf12774, Pf12775, Pf12777, Pf12780, Pf12781, Pf13173, Pf13207, Pf13401	1778	DYNC1H1	14					0	0	1.756	100	100	0.403749	1.62313e-16	1.7785e-16	16.77			191.2	108.8		14.14			551405	402752	582762	295204						1	1	1
AAF29081.1	HSPC117 [OS=Homo sapiens]	0	108.796	33	10	66	10	505	55.2	7.08	156.7	10	Pf01139	51493	C22orf28; RTCB	22					0	0	1.154	1.328	1.086	0.583645	0.495101	0.898105	19.34	29.76	23.3	106.4	104.3	89.3	11.88	5.21	2.46	9.35536e+07	7.14197e+07	7.01952e+07	8.18534e+07	6.53188e+07	6.99152e+07	65800698	6.18979e+07	61295907	10	9	8
NP_006005.2	EKC/KEOPS complex subunit LAGE3 [OS=Homo sapiens]	0	50.986	33	2	11	2	143	14.8	8.63	35.82	2	Pf09341	8270	LAGE3	X	ENSG00000196976.7			tRNA modification in the nucleus and cytosol	3	0	1.316	1.703	1.597	0.562323	0.0901321	0.0211699	17.58	23.33	41.6	128.4	120.8	50.7	9.79	18.11	24.11	5.07773e+06	5.05877e+06	4.56159e+06	4.49282e+06	4.91806e+06	3.65743e+06	1.78416e+06	1.80982e+06	2.62104e+06	2	2	2
NP_009210.1	Splicing factor U2AF 65 kDa subunit isoform a [OS=Homo sapiens]	0	67.311	33	8	31	8	475	53.5	9.09	98.9	8	Pf00076, Pf13893, Pf14259	11338	U2AF2	19	ENSG00000063244.12	mRNA Processing	Spliceosome	Cleavage of Growing Transcript in the Termination Region ; Transport of Mature mRNA derived from an Intron-Containing Transcript; mRNA 3'-end processing; mRNA Splicing - Major Pathway	13	0	1.101	0.988	0.938	0.855953	0.871922	0.778126	44.6	59.33	34.06	115.7	100.2	84.1	8	6.54	12.83	5.77801e+07	4.72129e+07	4.67299e+07	4.47087e+07	34698246	4.08457e+07	3.62126e+07	3.32103e+07	4.20244e+07	7	7	7
XP_011540695.1	PREDICTED: far upstream element-binding protein 1 isoform X4 [OS=Homo sapiens]	0	133.839	33	16	104	14	667	69.8	7.84	226.59	16	Pf00013, Pf07650, Pf13014	8880	FUBP1	1					0	1	1.217	1.422	1.128	0.248241	0.298377	0.800436	27.72	36.95	37.98	120.6	100.4	78.9	3.85	12.72	10.2	9.85197e+07	82406281	8.66329e+07	7.96217e+07	6.48177e+07	5.72677e+07	6.61863e+07	5.57099e+07	5.33745e+07	13	13	13
P25205.3	RecName: Full=DNA replication licensing factor MCM3; AltName: Full=DNA polymerase alpha holoenzyme-associated protein P1; AltName: Full=P1-MCM3; AltName: Full=RLF subunit beta; AltName: Full=p102 [OS=Homo sapiens]	0	156.994	33	22	107	22	808	90.9	5.77	244.65	22	Pf00493, Pf01078, Pf07728, Pf14551	4172	MCM3	6	ENSG00000112118.18	Cell Cycle; Retinoblastoma (RB) in Cancer; G1 to S cell cycle control; DNA Replication	DNA replication; Cell cycle	M/G1 Transition; Assembly of the pre-replicative complex; Unwinding of DNA; Regulation of DNA replication; Activation of ATR in response to replication stress; Activation of the pre-replicative complex; Orc1 removal from chromatin; Removal of licensing factors from origins	26	0	1.162	1.175	1.066	0.490074	0.845009	0.941131	25.83	28.88	21.86	113.5	98.4	88.1	3.32	0.95	6.09	1.34447e+08	1.25028e+08	1.29616e+08	1.10301e+08	9.75349e+07	1.04257e+08	1.07787e+08	9.49496e+07	9.4831e+07	19	20	19
AAV38522.1	Proteasome (prosome, macropain) subunit, alpha type, 5 [OS=Homo sapiens]	0	64.566	33	6	49	6	241	26.4	4.79	134.86	6	Pf00227, Pf10584	5686	PSMA5	1		Proteasome Degradation			1	0	0.979	1.031	1.015	0.878178	0.951005	0.97383	49.69	42.54	23.45	108.1	95.6	96.3	9.95	6.2	5.95	8.77499e+07	6.78835e+07	6.85373e+07	6.88872e+07	5.3373e+07	5.99714e+07	5.76682e+07	6.25043e+07	6.25388e+07	6	6	6
AAH50036.1	CSNK2A1 protein [OS=Homo sapiens]	0	89.127	33	9	54	8	397	45.9	7.96	123.27	9	Pf00069, Pf01636, Pf07714	1457	CSNK2A1	20		TNF alpha Signaling Pathway; Brain-Derived Neurotrophic Factor (BDNF) signaling pathway			2	1	1.095	1.176	1.07	0.867352	0.842552	0.933317	15.97	33.55	31.53	93.9	114.1	92.1	6.76	20.25	5.49	4.26131e+07	4.25719e+07	4.41092e+07	3.76235e+07	4.65737e+07	5.20113e+07	3.97186e+07	4.11135e+07	4.3126e+07	8	9	8
BAA07918.1	proteasome subunit p112 [OS=Homo sapiens]	0	151.867	33	20	94	1	953	105.8	5.39	224.67	20	Pf01851, Pf13513, Pf13646	5707	PSMD1	2		Proteasome Degradation; Parkin-Ubiquitin Proteasomal System pathway			2	0	1.45	1.141	0.788	0.617479	0.985012	0.32867	31.65	85.7	31.53	113	88	99	40.57	12.01	93.84	2.90659e+06	1.32359e+06	1.43855e+06	1109852	1.09651e+06	911458	5554982	1.19626e+06	1.18951e+06	1	1	1
BAF83660.1	unnamed protein product [OS=Homo sapiens]	0	167.845	33	17	107	17	645	72.8	5.1	256.01	17	Pf00085, Pf01216, Pf13098, Pf13848, Pf13905	9601	PDIA4	7					0	0	1.076	1.118	0.988	0.870048	0.942759	0.913684	24.51	35.56	23.13	104.4	100.1	95.6	2.82	5.98	4.46	1.42606e+08	1.3173e+08	1.39555e+08	1.30447e+08	1.27599e+08	1.22924e+08	1.1745e+08	1.2141e+08	1.24904e+08	16	17	17
AAH01446.1	dipeptidyl-peptidase 3 [OS=Homo sapiens]	0	114.591	33	12	57	12	737	82.5	5.1	167.89	12	Pf03571	10072	DPP3	11					0	0	1.134	1.071	0.997	0.785985	0.99814	0.93419	29.55	32.46	21.68	112.8	96.2	90.9	11.43	2.52	6.32	5.22194e+07	4.05932e+07	3.94423e+07	3.72901e+07	3.27306e+07	3.3109e+07	3.28234e+07	3.38053e+07	3.61758e+07	11	11	10
EAW92250.1	ribosomal protein L35a, isoform CRA_c [OS=Homo sapiens]	0	23.161	33	6	37	6	144	16	11.19	14.59	6	Pf01247	6165	RPL35A	3		Cytoplasmic Ribosomal Proteins			1	0	1.039	0.922	0.886	0.980794	0.709581	0.56855	26.57	35.1	28.92	93.2	100.5	106.3	11.49	11.32	8.64	9.28686e+07	8.25444e+07	1.07878e+08	8.66037e+07	9.51276e+07	8.88797e+07	9.91853e+07	8.58218e+07	1.00986e+08	6	6	6
AAA59553.1	Microtubule-associated protein 4 [OS=Homo sapiens]	0	204.024	33	19	118	19	1152	121.1	5.45	290.89	19	Pf00418	4134	MAP4	3					0	0	1.204	1.021	0.869	0.268877	0.932127	0.492842	28.06	32.48	26.23	102.8	92.2	105	7.6	8.68	3.52	9.12041e+07	9.08812e+07	9.93205e+07	7.53979e+07	7.73285e+07	8.14546e+07	9.30252e+07	9.5969e+07	9.68888e+07	16	15	14
AAV74413.1	Nucleostemin [OS=Homo sapiens]	0	67.634	33	13	49	1	549	61.9	9.06	82.62	13	Pf01926, Pf02421, Pf08701	26354	GNL3	3					0	0	1.276	0.789	0.592	0.769251	0.385088	0.00355396	33.24	17.72	33.24	102.7	67.7	129.6	26.27	31.49	24.27	1.44848e+06	2.17035e+06	2.10843e+06	1.06716e+06	1.73623e+06	1.27583e+06	2.57944e+06	2.84342e+06	1.71618e+06	1	1	1
NP_003680.2	aflatoxin B1 aldehyde reductase member 2 isoform 1 [OS=Homo sapiens]	0	67.757	33	7	34	7	359	39.6	7.17	94.14	7	Pf00248	8574	AKR7A2	1	ENSG00000053371.12	Aflatoxin B1 metabolism; Metapathway biotransformation	Metabolism of xenobiotics by cytochrome P450	Aflatoxin activation and detoxification	6	0	0.99	1.053	0.986	0.908024	0.97494	0.911175	27.12	34.9	34.09	118.8	104.6	76.6	3.02	19.99	2.95	3.54295e+07	2.91374e+07	3.24365e+07	3.85603e+07	2.47933e+07	2.52439e+07	2.12582e+07	1.9744e+07	1.97321e+07	7	7	7
AAD34069.1	CGI-74 protein [OS=Homo sapiens]	0	94.183	33	13	84	9	402	47.6	10.05	150.31	13	Pf03194	51631	LUC7L2	7					0	4	0.992	1.022	1.05	0.903538	0.933651	0.975333	15.61	19.73	20.51	97	103.5	99.5	3.06	3.8	7.17	8.17342e+07	7.56228e+07	7.86601e+07	83749635	7.29424e+07	7.24405e+07	8.13796e+07	7.67063e+07	6.87603e+07	11	11	10
NP_001681.2	V-type proton ATPase catalytic subunit A [OS=Homo sapiens]	0	123.918	33	16	75	16	617	68.3	5.52	154.55	16	Pf00006, Pf00306, Pf02874	523	ATP6V1A	3	ENSG00000114573.9		mTOR signaling pathway; Rheumatoid arthritis; Vibrio cholerae infection; Collecting duct acid secretion; Metabolic pathways; Oxidative phosphorylation; Phagosome; Synaptic vesicle cycle; Epithelial cell signaling in Helicobacter pylori infection	Transferrin endocytosis and recycling; ROS, RNS production in phagocytes; Ion channel transport; Insulin receptor recycling	20	0	1.133	1.146	1	0.740764	0.898925	0.943261	32.21	34.61	33.34	111.2	94.5	94.4	17.39	10.57	3.99	9.15397e+07	5.89723e+07	6.62188e+07	6.29208e+07	4.47727e+07	5.16888e+07	5.45119e+07	56659090	5.21736e+07	15	14	14
NP_057439.2	probable ATP-dependent RNA helicase DDX47 isoform 1 [OS=Homo sapiens]	0	70.285	33	9	49	9	455	50.6	9.1	142.24	9	Pf00270, Pf00271	51202	DDX47	12	ENSG00000213782.7			Major pathway of rRNA processing in the nucleolus and cytosol; rRNA modification in the nucleus and cytosol	5	0	0.936	1.063	1.152	0.754003	0.988452	0.727423	36.64	34.56	26.3	109.9	102.3	87.7	13.53	7.24	14.45	3.063e+07	3.47111e+07	3.63491e+07	3.28041e+07	2.93909e+07	3.47359e+07	2.46746e+07	2.75526e+07	3.20021e+07	9	9	9
BAD92457.1	26S proteasome-associated pad1 homolog variant, partial [OS=Homo sapiens]	0	27.612	33	3	15	3	163	18.9	7.01	29.99	3	Pf13012	10213	PSMD14	2		Parkin-Ubiquitin Proteasomal System pathway			1	0	1.063	1.081	1.035	0.935829	0.988452	0.997406	21.54	15.11	16.31	99.5	105.5	95	23.74	2.24	8.55	6.54481e+07	3.5124e+07	5.10563e+07	5.35807e+07	4.63404e+07	5.11935e+07	4.72457e+07	4.1686e+07	4.91174e+07	3	2	2
XP_011532966.1	PREDICTED: calnexin isoform X2 [OS=Homo sapiens]	0	197.967	33	19	139	19	646	73.4	4.65	386.78	19	Pf00262	821	CANX	5					0	0	0.904	0.874	0.955	0.473702	0.533548	0.835755	34.43	40.53	33.93	91.3	104.8	103.9	17.97	14.66	17.49	1.86523e+08	1.18508e+08	1.34437e+08	1.83062e+08	1.20665e+08	1.41794e+08	1.48415e+08	1.90534e+08	1.38926e+08	16	16	16
AAF25683.1	over-expressed breast tumor protein [OS=Homo sapiens]	0	9.344	32	2	18	2	74	8	6.62	19.46	2	Pf15184	100188893	TOMM6	6					0	0	0.925	0.867	1.018	0.75678	0.504547	0.977765	15.09	22.78	27.44	91.8	99.8	108.4	6.92	8.95	25.07	1.9905e+07	1.65169e+07	1.64603e+07	1.93484e+07	1.74554e+07	1.55555e+07	2.05658e+07	2.18679e+07	1.30668e+07	2	2	2
CAE45922.1	Hypothetical protein [OS=Homo sapiens]	0	98.965	32	15	71	15	552	61.6	5.85	125.54	15	Pf00928	372	ARCN1	11					0	0	1.276	1.338	1.013	0.132155	0.470752	0.970476	30.36	34.85	37.06	98.7	82.1	119.2	2.83	11.49	3.45	8.0303e+07	6.64612e+07	7.31071e+07	6.0193e+07	5.20597e+07	6.72415e+07	8.56735e+07	8.38589e+07	7.84159e+07	12	11	12
NP_008950.1	Ubiquitin-conjugating enzyme E2 C isoform 1 [OS=Homo sapiens]	0	23.571	32	4	16	4	179	19.6	7.37	39.59	4	Pf00179, Pf05743	11065	UBE2C	20	ENSG00000175063.16	Gastric Cancer Network 1; Gastric cancer network 2	Ubiquitin mediated proteolysis	Inactivation of APC/C via direct inhibition of the APC/C complex; APC/C:Cdc20 mediated degradation of Cyclin B; Autodegradation of Cdh1 by Cdh1:APC/C; APC-Cdc20 mediated degradation of Nek2A; APC/C:Cdh1 mediated degradation of Cdc20 and other APC/C:Cdh1 targeted proteins in late mitosis/early G1; Antigen processing: Ubiquitination & Proteasome degradation; Phosphorylation of the APC/C; APC/C:Cdc2…	39	0	1.24	1.268	1.048	0.674959	0.654293	0.976794	25.69	30.72	31.16	122.4	77.6	100	1.12	39.64	38.03	8.68583e+06	7670778	8.43337e+06	5.13349e+06	4.59515e+06	9.09185e+06	3.94767e+06	6.47324e+06	8.62412e+06	4	4	4
CAA62690.1	de-ubiquitinase [OS=Homo sapiens]	0	158.43	32	21	136	21	858	95.7	5.03	336.19	21	Pf00443, Pf00627, Pf02148, Pf13423	8078	USP5	12					0	0	1.039	1.073	1.045	0.995934	0.997817	0.981047	19.89	19.75	17.96	103.1	99.6	97.3	11.45	2.9	2.83	7.87858e+07	5.60287e+07	6.26143e+07	6.09934e+07	5.05368e+07	5.55978e+07	5.97206e+07	5.61912e+07	5.50451e+07	20	18	19
BAH12223.1	unnamed protein product [OS=Homo sapiens]	0	110.435	32	10	110	10	352	38.6	8	253.52	10	Pf00056, Pf02866	4190	MDH1	2		Glycolysis and Gluconeogenesis			1	0	1.058	1.098	1.018	0.920468	0.968604	0.977951	21.31	25.91	17.56	102.5	108.9	88.6	4.48	3.08	9.72	264401417	2.13288e+08	2.33123e+08	2.45137e+08	2.15266e+08	2.15595e+08	1.95259e+08	2.20398e+08	1.82489e+08	10	10	10
BAD93092.1	Calpain 2, large [catalytic] subunit precursor variant, partial [OS=Homo sapiens]	0	168.547	32	18	98	1	729	83.1	5.06	263.81	18	Pf00648, Pf01067, Pf13833	824	CAPN2	1		Integrin-mediated Cell Adhesion; VEGFA-VEGFR2 Signaling Pathway	Protein processing in endoplasmic reticulum; Apoptosis; Focal adhesion; Alzheimer's disease		6	15	1.013	0.947	0.964	0.969209	0.779712	0.865051	30.62	34.9	24.39	100.2	100.9	98.9	16.11	3.49	7.17	1.00609e+08	6.50497e+07	7.62095e+07	77579121	6.35385e+07	7.04728e+07	8.07228e+07	7.14774e+07	6.85457e+07	15	15	16
BAC11324.1	unnamed protein product [OS=Homo sapiens]	0	111.135	32	9	93	9	408	44.9	8.65	225.7	9	Pf04774	26135	SERBP1	1		Apoptosis-related network due to altered Notch3 in ovarian cancer			1	0	1.133	1.114	0.994	0.637742	0.951005	0.930033	32.45	47	33.57	112.9	100.8	86.3	4.14	11.08	8.45	1.2321e+08	1.15736e+08	1.17576e+08	1.03901e+08	1.09396e+08	9.5667e+07	1.00492e+08	8.53135e+07	8.47668e+07	9	9	9
AAB24841.1	Tat binding protein 7, TBP-7=transcriptional activator [OS=Homo sapiens]	0	83.073	32	10	70	2	458	51.5	5.73	143.78	10	Pf00004, Pf00910, Pf01057, Pf01078, Pf07724, Pf07726, Pf07728, Pf13191								0	8	1.128	1.014	0.918	0.659094	0.916947	0.706234	21.09	31.5	31.92	119.3	102.2	78.5	4.17	5.64	10.96	1.0299e+08	8.88872e+07	9.04308e+07	8.19843e+07	7.5146e+07	7.10035e+07	6.16327e+07	5.65569e+07	6.93034e+07	10	10	10
EAW91364.1	ladinin 1, isoform CRA_b [OS=Homo sapiens]	0	81.975	32	12	47	1	517	57.1	9.6	104.47	12		3898	LAD1	1					0	0
AAH08801.1	Cold shock domain protein A [OS=Homo sapiens]	0	88.529	32	7	66	1	372	40	9.77	134.15	7	Pf00313	8531	CSDA; YBX3	12		RalA downstream regulated genes; Apoptosis-related network due to altered Notch3 in ovarian cancer			2	3	1.405	1.309	1.001	0.10292	0.544505	0.944831	24.18	18.53	23.41	120.9	86	93.1	18.8	11.35	11.06	2.04415e+07	1.56186e+07	1.32345e+07	1.35895e+07	1.04986e+07	1.00631e+07	1.26755e+07	1.03738e+07	1.27258e+07	2	2	2
AAB82560.1	STE20-like kinase 3 [OS=Homo sapiens]	0	46.155	32	9	20	5	431	47.9	5.43	43.8	9	Pf00069, Pf07714	8428	STK24	13					0	4	1.055	1.068	0.98	0.983602	0.995561	0.897247	20.49	23.08	21.11	99.7	96.6	103.7	8.36	6.7	7.71	3.82611e+07	3.03086e+07	3.07896e+07	3.16474e+07	2.77041e+07	3.28665e+07	2.97394e+07	3.25853e+07	3.36557e+07	7	7	7
NP_001484.1	Rab GDP dissociation inhibitor alpha [OS=Homo sapiens]	0	68.903	32	9	48	3	447	50.6	5.14	74.19	9	Pf00996	2664	GDI1	X	ENSG00000203879.11	Integrated Breast Cancer Pathway		RAB GEFs exchange GTP for GDP on RABs; Rho GTPase cycle	8	0	1.448	0.737	0.603	0.460956	0.214372	0.00374348	23.34	36.95	52.46	106.2	57.8	136	70.79	79.03	21.39	8.0212e+06	2.45846e+06	2.29323e+06	1.44106e+06	1.2108e+06	4.60226e+06	4.47718e+06	2.95717e+06	3.22773e+06	2	2	1
CAG46781.1	Rab6A [OS=Homo sapiens]	0	31.041	32	6	28	5	208	23.5	5.38	45.19	6	Pf00025, Pf00071, Pf02421, Pf04670, Pf08477, Pf09439	5870	RAB6A	11					0	0	0.893	0.902	1.03	0.584216	0.644717	0.997406	26.6	22.4	22.59	108.8	107	84.2	21.87	20.58	26.74	3.42495e+07	2.67212e+07	2.0827e+07	3.21745e+07	2.48168e+07	1.96073e+07	3.26229e+07	2.00405e+07	2.12031e+07	5	5	5
NP_001186731.1	60S ribosomal protein L11 isoform 2 [OS=Homo sapiens]	0	45.512	32	6	50	3	177	20.1	9.6	124.2	6	Pf00281, Pf00673	6135	RPL11	1		Cytoplasmic Ribosomal Proteins			1	3	1.034	0.98	0.982	0.993345	0.849313	0.898388	20.58	21.09	14.86	99	99.3	101.7	7.85	5.1	2.47	9.50616e+07	89912145	83585615	8.36445e+07	8.11289e+07	83086557	9.21592e+07	8.59732e+07	8.73959e+07	5	5	5
AAC27674.1	eIF-3 p110 subunit [OS=Homo sapiens]	0	164.56	32	23	128	23	913	105.3	5.72	259.67	23	Pf01399, Pf05470	8663	EIF3C	16		Translation Factors			1	0	1.101	1.152	1.08	0.789592	0.890905	0.911442	21.31	32.08	26.85	119	93.5	87.5	4.35	3.37	1.75	1.73675e+08	1.4239e+08	1.51823e+08	1.17347e+08	1.05752e+08	1.16365e+08	1.13733e+08	1.08171e+08	1.0734e+08	21	20	21
O43169.2	RecName: Full=Cytochrome b5 type B; AltName: Full=Cytochrome b5 outer mitochondrial membrane isoform; Flags: Precursor [OS=Homo sapiens]	0	64.451	32	3	56	3	146	16.3	4.97	281.11	3	Pf00173	80777	CYB5B	16	ENSG00000103018.16	Oxidation by Cytochrome P450		Phase I - Functionalization of compounds	4	0	0.686	0.794	1.036	0.0016907	0.254395	0.995257	27.39	39.18	33.25	68.1	115.7	116.2	15.66	5.49	42.56	2.81054e+07	2.43242e+07	3.44905e+07	4.22153e+07	3.93874e+07	4.37038e+07	1.96255e+07	4.91065e+07	4.29703e+07	3	3	3
EAX11058.1	alkylglycerone phosphate synthase, isoform CRA_b [OS=Homo sapiens]	0	65.782	32	11	52	11	684	75.3	7.5	143.67	11	Pf01565, Pf02913	8540	AGPS	2		Triacylglyceride Synthesis			1	0	1.053	1.28	1.169	0.984186	0.622954	0.680668	26.09	40.07	36.57	97.8	112.7	89.5	7.54	12.07	11.82	2.0941e+07	1.75542e+07	2.20549e+07	2.26735e+07	2.06557e+07	1.73033e+07	1.67263e+07	2.04495e+07	1.71569e+07	8	10	10
BAG58917.1	unnamed protein product [OS=Homo sapiens]	0	104.422	32	13	80	13	535	60.1	4.42	161.66	13	Pf07915, Pf12999, Pf13015	5589	PRKCSH	19					0	0	1.09	0.968	0.874	0.834645	0.822988	0.518356	24.15	31.26	20.79	117.4	84.7	97.9	7.06	4.61	8.51	1.21637e+08	9.23781e+07	1.06169e+08	8.02451e+07	6.42507e+07	7.03922e+07	7.81372e+07	9.08376e+07	8.35686e+07	12	12	10
BAD96691.1	epithelial protein lost in neoplasm beta variant, partial [OS=Homo sapiens]	0	102.781	32	15	60	15	759	85.2	6.84	137.59	15	Pf00412	51474	LIMA1	12					0	0	1.186	1.217	1.018	0.390402	0.772508	0.977951	32.26	37.57	30.62	117.5	90.9	91.6	11.28	5.08	2.87	1.14093e+08	8.80436e+07	86562999	7.5727e+07	6.43208e+07	6.35282e+07	7.23593e+07	7.34633e+07	6.89109e+07	12	12	12
EAW87021.1	transcription elongation factor B (SIII), polypeptide 1 (15kDa, elongin C), isoform CRA_b [OS=Homo sapiens]	0	18.247	32	2	10	2	84	8.9	5.76	22.64	2	Pf03931	6921	TCEB1; ELOC	8					0	0	1.064	1.165	1.052	0.972412	0.865522	0.970656	13.22	18.84	19.93	106.8	103.3	89.9	4.51	5.41	6.83	1.38528e+07	1.31662e+07	13400975	1.28397e+07	1.14909e+07	1.09576e+07	1.0945e+07	9699654	1.09994e+07	2	2	2
CAH18372.1	Hypothetical protein [OS=Homo sapiens]	0	10.094	32	2	11	2	140	15.5	8.72	16.41	2	Pf04667	2029	ENSA	1					0	0	2.534	3.034	1.13	1.3727e-07	8.00948e-09	0.798516	23.15	40.33	15.25	125	94.1	80.9	46.49	8.69	5.35	1.75121e+07	7.14369e+06	8.06513e+06	6.40015e+06	5.27828e+06	4.98974e+06	5.37155e+06	4.73301e+06	4925190	2	2	2
XP_005255285.3	PREDICTED: calcium-regulated heat stable protein 1 isoform X1 [OS=Homo sapiens]	0	13.34	32	2	10	2	168	18.1	8.85	24.98	2	Pf00313	23589	CARHSP1	16					0	0	1.27	1.137	0.896	0.685355	0.925073	0.637336	24.58	11.89	18.13	137.9	76.7	85.4	20.29	24.73	37.55	4.51326e+06	5.95355e+06	5432482	2989923	2.51117e+06	4.06617e+06	3.13629e+06	5.73504e+06	3172613	2	2	2
AAF31670.1	Tropomodulin 3 [OS=Homo sapiens]	0	42.128	32	8	35	8	352	39.6	5.19	89.9	8	Pf03250	29766	TMOD3	15					0	0	0.953	1.025	0.998	0.826021	0.941066	0.936138	23.84	30.31	18.07	101.6	87.4	111	2.81	25.83	28.73	2.70959e+07	2.50232e+07	2.64469e+07	1.59272e+07	1.97705e+07	2.52023e+07	1.61099e+07	2.74549e+07	2.74314e+07	8	8	7
AAH56155.1	Sf3b1 protein, partial [OS=Homo sapiens]	0	163.723	32	20	106	1	789	87.4	7.33	245.25	20	Pf08920, Pf12815	23451	SF3B1	2		mRNA Processing			1	0	0.965	0.985	1.036	0.874964	0.863961	0.996333	5.26	12.45	7.28	100.1	101.7	98.2	13.06	2.2	8.19	10583680	11783644	12621042	13156526	11091526	11770124	10722367	11755889	12272451	1	1	1
NP_001091868.1	coatomer subunit alpha isoform 1 [OS=Homo sapiens]	0	186.675	32	29	113	29	1233	139.2	7.59	263.29	29	Pf00400, Pf04053, Pf06957	1314	COPA	1	ENSG00000122218.14				0	0	0.995	0.939	0.961	0.917772	0.759859	0.856352	23.62	23.33	22.49	96.5	97.4	106	2.53	1.18	3.91	1.10489e+08	9.21369e+07	1.00699e+08	1.02697e+08	8.8302e+07	9.32955e+07	1.04309e+08	1.05107e+08	1.09592e+08	23	25	24
AAP20105.1	transformation-related gene 7 [OS=Homo sapiens]	0	29.784	32	3	16	2	175	19.8	6.64	55.56	3	Pf01105	222068	TMED4	7					0	0	0.755	0.474	0.954	0.241708	1.2819e-05	0.834591	104.64	62.12	54.41	90.8	81.3	128	28.32	9.93	28.85	7.83441e+06	3.8132e+06	6.68589e+06	5.79775e+06	5.20106e+06	6.42544e+06	5.35904e+06	8.95841e+06	9.29835e+06	2	2	2
AAP35590.1	dihydropyrimidinase-like 2 [OS=Homo sapiens]	0	147.851	32	12	87	1	619	67	6	287.92	12	Pf01979, Pf02815, Pf13594								0	0	1.643	1.156	0.703	0.46585	0.978758	0.149225	39.75	1.98	41.13	121.3	73.8	104.9	1.89	29.47		1.36755e+06		1.33359e+06	1.11e+06	695774	576013			1074117	1		1
NP_003923.2	hsc70-interacting protein isoform 1 [OS=Homo sapiens]	0	127.187	32	13	105	13	369	41.3	5.27	217.29	13	Pf00515, Pf13371, Pf13414, Pf13431, Pf13432	6767	ST13	22	ENSG00000100380.13			Regulation of HSF1-mediated heat shock response	4	0	1.132	1.062	0.949	0.647521	0.988004	0.814721	24.41	22.93	25.42	106.8	98.8	94.4	4.2	3.53	7.24	1.35002e+08	1.24176e+08	1.39346e+08	1.16767e+08	1.09236e+08	114842508	1.07862e+08	1.22181e+08	1.12606e+08	11	12	11
AAF09482.1	E2IG3 [OS=Homo sapiens]	0	76.411	32	13	50	1	560	63.5	9.54	87.23	13	Pf01926, Pf02421, Pf08701	26354	GNL3	3					0	11	0.88	0.799	0.906	0.502956	0.266976	0.660882	23.62	29.38	19.93	85.7	99.9	114.4	6.52	7.19	4.56	3.66005e+07	2.87194e+07	30979519	4.02642e+07	3.162e+07	3.2743e+07	4.29949e+07	3.85814e+07	3.93296e+07	10	11	11
NP_067038.1	regulation of nuclear pre-mRNA domain-containing protein 1B [OS=Homo sapiens]	0	63.589	32	9	25	5	326	36.9	5.97	58.88	9	Pf04818	58490	RPRD1B	20	ENSG00000101413.11			RNA polymerase II transcribes snRNA genes	3	4	1.047	0.877	0.876	0.993345	0.544746	0.528013	25.96	22.56	18.44	97.9	94.1	108	2.36	7.51	13.51	1.84352e+07	1.60916e+07	1.82279e+07	1.73481e+07	1.31251e+07	1.54533e+07	1.53571e+07	1.83397e+07	1.9558e+07	9	9	9
NP_002931.2	ATP-binding cassette sub-family E member 1 [OS=Homo sapiens]	0	95.761	32	14	63	14	599	67.3	8.34	94.68	14	Pf00005, Pf04068, Pf13304, Pf13671	6059	ABCE1	4	ENSG00000164163.10			Interferon alpha/beta signaling	4	0	1.028	1.035	0.969	0.99773	0.956094	0.881504	23.95	39.53	29.73	103	103.4	93.7	8.11	4.52	8.42	7.9437e+07	5.96514e+07	6.68959e+07	6.65211e+07	5.41858e+07	6.23129e+07	67859285	5.75269e+07	5.73924e+07	13	12	12
NP_005361.2	Ras-related protein Rab-8A [OS=Homo sapiens]	0	45.585	32	6	26	4	207	23.7	9.07	36.15	6	Pf00025, Pf00071, Pf08477	4218	RAB8A	19	ENSG00000167461.11	Focal Adhesion-PI3K-Akt-mTOR-signaling pathway	Pancreatic secretion; Endocytosis; AMPK signaling pathway	Translocation of GLUT4 to the plasma membrane; TBC/RABGAPs; VxPx cargo-targeting to cilium; Regulation of PLK1 Activity at G2/M Transition; Anchoring of the basal body to the plasma membrane; RAB GEFs exchange GTP for GDP on RABs; RAB geranylgeranylation	23	0	1.142	4.618	3.362	0.83252	1.62313e-16	1.7785e-16	30.66	95.83	92.6	140.4	123.6	36.1	15.54	8.51	50.82	1.69621e+07	1.31917e+07	1.17594e+07	1.33133e+07	1.09703e+07	1.04147e+07	3.57452e+06	2.40195e+06	6.40243e+06	3	3	2
AAA60080.1	Pgm1 [OS=Homo sapiens]	0	66.324	32	12	52	12	562	61.3	6.64	76.19	12	Pf00408, Pf02878, Pf02879, Pf02880	5236	PGM1	1		Glycogen Metabolism			1	0	1.15	1.196	1.029	0.772855	0.8028	0.995721	20.06	30	29.29	108.6	97.1	94.3	8.8	8.67	5.59	2.9654e+07	2.19554e+07	2.76441e+07	2.44875e+07	1.8935e+07	2.37469e+07	2.15538e+07	2.35789e+07	2.2659e+07	10	10	10
AAH23528.2	glutaredoxin 5 [OS=Homo sapiens]	0	32.937	32	3	36	1	157	16.6	6.79	122.4	3	Pf00462	51218	GLRX5	14					0	0	1.264	1.559	1.222	0.757995	0.323993	0.704293	21.79	28.69	17.81	121.7	96.2	82.1	21.88	13.2	15.65	4384051	2.97142e+06	2.70766e+06	2.532e+06	2.52397e+06	2.04753e+06	1.68356e+06	2.07238e+06	2.24258e+06	1	1	1
NP_006808.1	endoplasmic reticulum resident protein 29 isoform 1 precursor [OS=Homo sapiens]	0	47.028	32	7	47	7	261	29	7.31	105.13	7	Pf07749, Pf07912	10961	ERP29	12	ENSG00000089248.6		Protein processing in endoplasmic reticulum		1	0	0.973	0.906	0.962	0.867352	0.655806	0.860744	18.84	25.52	35.01	92.4	100.9	106.7	8.56	8.27	21.39	3.38716e+07	3.03483e+07	3.76092e+07	3.50243e+07	3.13021e+07	3.76974e+07	2.64588e+07	4.00036e+07	3.59502e+07	6	6	6
NP_001238968.1	ras-related protein Rab-5C isoform b [OS=Homo sapiens]	0	42.398	32	6	33	5	249	27	8.66	92.07	6	Pf00009, Pf00025, Pf00071, Pf04670, Pf08477	5878	RAB5C	17	ENSG00000108774.14				0	1	0.786	0.877	1.156	0.109345	0.542579	0.719275	43.46	38.43	44.18	92.4	106	101.6	1.66	11.1	14.6	25218834	2.13481e+07	2.33304e+07	2.46153e+07	2.67806e+07	2.45937e+07	2.21619e+07	2.89398e+07	2.41912e+07	5	6	6
CAD97673.1	hypothetical protein, partial [OS=Homo sapiens]	0	47.748	32	11	46	11	290	33.1	7.94	61.46	11	Pf00043, Pf00462, Pf02798, Pf13409, Pf13417, Pf14497	9446	GSTO1	10		Myometrial Relaxation and Contraction Pathways			1	0	1.132	1.076	0.879	0.681623	0.995256	0.537224	29.08	28.18	31.01	97.8	84.5	117.7	19.59	16.17	6.47	1.04164e+08	6.22866e+07	7.74772e+07	8.55804e+07	5.81328e+07	5.98982e+07	8.69597e+07	9.65762e+07	8.79571e+07	9	8	11
EAW68637.1	hCG1784554, isoform CRA_a [OS=Homo sapiens]	0	94.024	32	11	51	11	372	39.1	5.45	108.13	11	Pf01398, Pf13012	8665	EIF3F	11		Translation Factors			1	0	0.983	1.069	1.06	0.881607	0.996442	0.950105	22.79	24.7	16.31	109.5	105.6	84.9	5.62	7.5	11.65	6.98023e+07	5.48147e+07	6.52127e+07	6.23935e+07	4.78663e+07	57767184	4.80106e+07	4.80638e+07	5.73851e+07	9	9	9
CAG28558.1	CKS2, partial [OS=Homo sapiens]	0	4.867	32	1	1	1	79	9.8	7.72	3.04	1	Pf01111	1164	CKS2	9					0	0	100	1.531	0.01	2.97569e-16	0.73399	1.7785e-16		303.15		181.5		118.5	127.04			230090		11701.3					31379		1		1
BAD96908.1	coatomer protein complex, subunit zeta 1 variant, partial [OS=Homo sapiens]	0	45.53	32	4	24	4	177	20.3	4.88	78.69	4	Pf01217	22818	COPZ1	12					0	0	1.148	1.243	1.206	0.791269	0.716362	0.562752	43.53	47.06	39.6	111.3	100.3	88.4	6.36	3.4	3.8	2.15346e+07	1.75689e+07	18009121	1.64362e+07	1.54313e+07	1.5813e+07	1.4704e+07	1.43371e+07	1.52265e+07	4	4	3
BAG61570.1	unnamed protein product [OS=Homo sapiens]	0	159.455	32	24	119	1	1009	111.9	5.22	226.71	24	Pf03178, Pf10433	1642	DDB1	11					0	0	0.751	0.895	1.214	0.577566	0.753401	0.804184	69.53	67.49	18.12	75.8	123	101.3	73.08	25.3	29.73		1.54179e+06	534291	969728	1.40877e+06	1.41073e+06	751659	1.20198e+06	1.3593e+06		1	1
NP_009148.2	programmed cell death protein 10 [OS=Homo sapiens]	0	33.462	32	5	11	5	212	24.7	8.19	33.28	5	Pf06840	11235	PDCD10	3	ENSG00000114209.14				0	0	1.045	1.054	1.027	0.995115	0.976694	0.993203	14.51	31.63	33.9	101.7	94.6	103.7	10	14.09	8.83	2.28833e+07	1.64685e+07	1.90655e+07	1.99017e+07	1.31348e+07	16291833	1.88597e+07	1.58155e+07	1.83967e+07	5	4	5
XP_011517227.1	PREDICTED: niban-like protein 1 isoform X2 [OS=Homo sapiens]	0	119.899	32	14	75	14	776	87.5	6.05	189.89	14		64855	FAM129B	9					0	0	1.12	1.085	0.906	0.824933	0.983721	0.661139	36.19	40.21	29.38	92	79.6	128.4	8.2	3.53	18.54	5.65572e+07	4.22567e+07	4.78788e+07	4.22675e+07	3.45482e+07	3.80607e+07	4.69572e+07	6.34835e+07	6.53917e+07	13	13	12
BAH12514.1	unnamed protein product [OS=Homo sapiens]	0	38.451	32	6	40	6	130	15.1	10.37	91.75	6	Pf01198	6160	RPL31	2	ENSG00000071082.10	Cytoplasmic Ribosomal Proteins			1	0	1.208	1.128	0.895	0.289932	0.925073	0.609382	33.94	52.38	28.56	96.7	95	108.3	32.81	10.02	7.25	1.32689e+08	6.61198e+07	7.64126e+07	7.05864e+07	6.51607e+07	7.91847e+07	9.0983e+07	7.74297e+07	8.06539e+07	3	3	4
BAG34830.1	unnamed protein product [OS=Homo sapiens]	0	7.397	32	3	8	3	73	8.5	7.28	1.69	3	Pf00240	59286	UBL5	19					0	0	1.481	2.57	1.765	0.0443041	2.30213e-06	0.000316993	17.8	31.49	24.32	146.2	100.9	52.9	8.01	5.72	66.26	1.7926e+07	1.39743e+07	1.4626e+07	1.03466e+07	1.00269e+07	9.64043e+06	14469878	5.22647e+06	4.67281e+06	3	3	3
BAB11885.1	BSCv, partial [OS=Homo sapiens]	0	101.024	31	9	79	9	429	47.7	6.11	193.61	9	Pf03088, Pf08450	57136	APMAP	20					0	0	0.889	0.952	1.089	0.358704	0.79448	0.89419	27.16	29.97	20.82	100.7	103.2	96	5.73	3.97	4.59	8.74043e+07	7.20978e+07	7.39941e+07	8.44279e+07	6.87331e+07	7.38015e+07	6.84258e+07	7.10112e+07	7.29317e+07	9	9	8
NP_060713.1	septin-11 isoform 2 [OS=Homo sapiens]	0	60.308	31	10	56	5	429	49.4	6.81	109.03	10	Pf00735	55752	SEPT11	4	ENSG00000138758.11		Bacterial invasion of epithelial cells		1	4	1.166	1.109	0.978	0.724973	0.956537	0.893275	30.87	31.34	27.6	111.5	88.7	99.8	20.43	2.09	10.81	2.44977e+07	28726989	3.5268e+07	2.55333e+07	2.16036e+07	22839959	2.32118e+07	28186137	2.63732e+07	8	9	9
NP_057128.2	fumarylacetoacetate hydrolase domain-containing protein 2A [OS=Homo sapiens]	0	49.543	31	5	17	5	314	34.6	8.24	49.67	5	Pf01557	51011	FAHD2A	2	ENSG00000115042.9				0	0	1.305	1.192	0.876	0.402527	0.813643	0.528013	42.25	21.97	40.17	109.6	82.6	107.8	14.74	32.15	6.47	1.71392e+07	1.21695e+07	1.23515e+07	1.47897e+07	7.02142e+06	9.16858e+06	1.37842e+07	1.23721e+07	1.18401e+07	5	3	4
NP_001975.1	S-formylglutathione hydrolase [OS=Homo sapiens]	0	90.973	31	6	69	6	282	31.4	7.02	154.17	6	Pf00326, Pf00756, Pf05448, Pf12695, Pf12697	2098	ESD	13	ENSG00000139684.13	Phase I biotransformations, non P450	Carbon metabolism	Glutathione conjugation	6	0	0.943	0.906	0.901	0.77433	0.65487	0.639059	29.97	30.75	24.02	100.9	89.4	109.7	19.5	15.56	7.84	7.27934e+07	4.28388e+07	5.754e+07	6.49415e+07	4.35976e+07	4.68736e+07	6.06821e+07	6.17614e+07	5.25908e+07	6	6	6
AAH29482.1	Hypothetical protein HSPC152 [OS=Homo sapiens]	0	32.014	31	3	24	3	125	14.1	5.47	63.48	3	Pf03966	51504	TRMT112	11					0	0	1.213	1.363	1.121	0.551821	0.416004	0.822901	10.96	17.63	7.86	123	93.1	83.9	13.72	16.22	3.1	3.00863e+07	2.01888e+07	2.38598e+07	2.24262e+07	1.56947e+07	1.53594e+07	1.57716e+07	15043472	1.58831e+07	3	3	3
AAI39732.1	IQ motif containing GTPase activating protein 1 [OS=Homo sapiens]	0	319.212	31	42	224	39	1657	189.2	6.48	558.2	42	Pf00307, Pf00397, Pf00616, Pf03836, Pf11016	8826	IQGAP1	15		VEGFA-VEGFR2 Signaling Pathway; EGF/EGFR Signaling Pathway; Regulation of Actin Cytoskeleton; G13 Signaling Pathway			4	3	1.076	0.986	0.925	0.869879	0.865522	0.727108	24.81	29.94	22.91	106.9	94.1	99	6.49	4.03	3.77	1.95704e+08	1.93508e+08	2.05409e+08	1.74532e+08	1.65589e+08	1.66143e+08	1.80468e+08	1.90268e+08	1.79458e+08	37	38	35
AAC18038.1	antigen NY-CO-7 [OS=Homo sapiens]	0	70.819	31	8	27	8	303	34.8	5.74	79.12	8	Pf00515, Pf04564, Pf07719, Pf12895, Pf13414, Pf13424, Pf13432, Pf14559	10273	STUB1	16		Androgen receptor signaling pathway; Parkin-Ubiquitin Proteasomal System pathway			2	0	1.015	1.705	1.661	0.977274	0.0373907	0.0018594	27.53	35.84	32.76	124.8	109.9	65.3	15.48	7.3	18.97	2.27026e+07	2.13122e+07	1.703e+07	1.72609e+07	1.7523e+07	1.74455e+07	1.39365e+07	9.49079e+06	1.06389e+07	7	7	7
NP_004956.5	Non-histone chromosomal protein HMG-14 [OS=Homo sapiens]	0	13.719	31	2	6	2	100	10.7	9.6	11.49	2		3150	HMGN1	21	ENSG00000205581.10	ATM Signaling Network in Development and Disease; p38 MAPK Signaling Pathway	Herpes simplex infection	Dual incision in TC-NER; Formation of TC-NER Pre-Incision Complex; Gap-filling DNA repair synthesis and ligation in TC-NER	9	0	1.366	1.589	1.163	0.730212	0.523519	0.898105	28.78	16.17	16.17	128.3	94.5	77.2	15.79	25.78	7.31	1.7451e+06	1.43359e+06	1.21317e+06	1.13751e+06	1.05746e+06	667423	957744	846330		2	1	1
XP_011528279.1	PREDICTED: adenylosuccinate lyase isoform X1 [OS=Homo sapiens]	0	64.17	31	11	57	11	526	59.3	7.09	101.12	11	Pf00206, Pf10397	158	ADSL	22		Nucleotide Metabolism			1	0	1.209	1.232	0.947	0.594682	0.742351	0.808835	37.82	38.33	31.05	101.7	94.7	103.5	18.25	3.11	2.89	4.27993e+07	2.7861e+07	2.97725e+07	2.94127e+07	2.45147e+07	2.58086e+07	3.08936e+07	28584645	2.90885e+07	11	10	11
AAF65506.1	HDCMD47P [OS=Homo sapiens]	0	64.11	31	6	65	6	226	25.6	8.73	146.81	6	Pf01323	373156	GSTK1	7					0	0	1.04	0.993	0.982	0.997968	0.883937	0.899483	37.39	33.51	30.72	84.7	110.4	104.9	11.15	20.23	5.67	3.06378e+07	2.93634e+07	3.62708e+07	3.23999e+07	4.28945e+07	3.8227e+07	4.02028e+07	3.75552e+07	3.49159e+07	6	6	6
AAB58817.1	ladinin [OS=Homo sapiens]	0	73.406	31	12	48	1	517	57.1	9.67	102.72	12		3898	LAD1	1					0	11	0.821	0.922	1.054	0.212578	0.709551	0.967046	39.99	34.37	43.65	97.6	99	103.4	22.06	31.83	17.37	3.61677e+07	2.30595e+07	2.2947e+07	3.6996e+07	2.21149e+07	1.8521e+07	2.76331e+07	1.91728e+07	2.50752e+07	10	9	9
EAW98190.1	cytochrome c oxidase subunit VIa polypeptide 1, isoform CRA_a [OS=Homo sapiens]	0	24.425	31	2	10	2	152	16.8	10.83	8.57	2	Pf02046	1337	COX6A1	12		Electron Transport Chain			1	0	0.99	1.265	1.18	0.920468	0.663111	0.647752	18.89	22.23	17.47	105.9	110.4	83.7	22.44	7.76	11	1.55083e+07	2.03802e+07	1.60854e+07	1.66108e+07	1.29218e+07	1.58694e+07	1.22208e+07	1.20797e+07	1.43682e+07	1	1	1
NP_006301.3	puromycin-sensitive aminopeptidase isoform 1 [OS=Homo sapiens]	0	161.285	31	20	128	20	919	103.2	5.72	291	20	Pf01433, Pf11838, Pf13485	9520	NPEPPS	17	ENSG00000141279.15			Antigen processing: Ubiquitination & Proteasome degradation	4	0	0.981	1.064	1.027	0.877075	0.988452	0.993203	22.66	27.5	20.02	100.7	106.7	92.6	2.17	3.87	11.2	110485411	9.70755e+07	1.09209e+08	1.10734e+08	9.10926e+07	1.03427e+08	8.26789e+07	9.22825e+07	1.0077e+08	18	17	17
AAD34112.1	CGI-117 protein [OS=Homo sapiens]	0	18.608	31	5	10	5	178	21.1	9.94	9.41	5	Pf09420	51491	NOP16	5					0	0	0.998	0.882	0.899	0.921508	0.566427	0.629021	27.25	25.58	24.06	98.9	90.4	110.7	12.94	9.32	4.77	3.80169e+07	2.80659e+07	28131618	2.76294e+07	2.33575e+07	2.93765e+07	3.44488e+07	3.24828e+07	3.04691e+07	4	4	3
AAH14837.1	ribosomal protein L15 [OS=Homo sapiens]	0	51.231	31	7	70	7	204	24.1	11.62	131.84	7	Pf00827	6138	RPL15	3		Cytoplasmic Ribosomal Proteins			1	0	1.078	1.069	1.001	0.869879	0.996014	0.9462	24.12	21.32	27.48	110.8	99.4	89.7	3.76	8.19	5.9	3.01123e+08	2.68421e+08	271251892	2.85347e+08	2.22763e+08	2.2672e+08	2.44676e+08	2.19906e+08	2.13058e+08	7	7	6
CAG28590.1	NEDD8, partial [OS=Homo sapiens]	0	25.221	31	2	24	1	81	9.1	8.43	57.62	2	Pf00240, Pf11976	4738	NEDD8	14		EGF/EGFR Signaling Pathway			1	0	0.01	0.01	0.04	2.97569e-16	1.62313e-16	1.7785e-16			2.74		11.4	288.6			31.2						552104	8.06742e+06	1.47122e+07	1.43392e+07
AAC41689.1	protein PP4-X [OS=Homo sapiens]	0	60.228	31	9	43	9	321	36	5.87	80.62	9	Pf00191	307	ANXA4	2		Prostaglandin Synthesis and Regulation			1	0	1.062	1.19	1.086	0.961381	0.815839	0.898105	29.3	24.47	25.11	104.9	96	99.1	4.92	17.99	10.56	4.5255e+07	4.16466e+07	4.10576e+07	5.07247e+07	3.21046e+07	3.61037e+07	4.18564e+07	3.85397e+07	3.30046e+07	6	7	6
BAG70238.1	dual specificity phosphatase 3, partial [OS=Homo sapiens]	0	23.826	31	4	14	4	185	20.6	8.15	26.79	4	Pf00102, Pf00782	1845	DUSP3	17					0	0	1.031	1.09	1.028	0.995557	0.976787	0.994222	21.4	20.73	17.68	102.7	104.9	92.4	10.16	2.16	20.93	1.07673e+07	1.11841e+07	1.23449e+07	1.19501e+07	1.09363e+07	1.14047e+07	8.20933e+06	1.23328e+07	1.03205e+07	3	4	4
BAD97199.1	UV excision repair protein RAD23 homolog B variant, partial [OS=Homo sapiens]	0	121.11	31	8	76	8	409	43.1	4.88	173.17	8	Pf00240, Pf00627, Pf09280, Pf11976, Pf13881	5887	RAD23B	9					0	0	1.213	1.256	1.039	0.227849	0.684414	0.991702	27.35	27.64	25.77	112.9	93.6	93.5	11.55	10.65	8.81	1.37917e+08	9.64312e+07	1.12483e+08	1.02244e+08	7.24132e+07	8.56571e+07	9.34514e+07	7.72416e+07	8.79036e+07	8	8	8
[truncated: 2,859 more rows]
[truncated: 8 more columns]
